# Supplementary material for: Cobalt-catalyzed radical-mediated carbon–carbon scission via a radical-type migratory insertion
Source: Royal Society of Chemistry journal article supplement (doi:10.1039/d2sc05200h), 2023-01-01
Supplement: d2sc05200h1.pdf [file d2sc05200h1.pdf]

Supporting Information

**Cobalt-Catalyzed Radical-Mediated Carbon-Carbon Scission via a Radical-type Migratory Insertion**

Jian-Biao Liu,\* Xiao-Jun Liu, João C. A. Oliveira, De-Zhan Chen, and Lutz Ackermann\*

## Table of Contents

|                                                                                                              |     |
|--------------------------------------------------------------------------------------------------------------|-----|
| <b>1. Supplementary results for radical-type migratory insertion of alkenes into Co–C bonds</b> .....        | S3  |
| <b>1.1 Selected reactions</b> .....                                                                          | S3  |
| <b>1.2 Computational methods and theoretical backgrounds</b> .....                                           | S4  |
| <b>1.3 Influence of different methods on the free energy profiles, geometries and spin populations</b> ..... | S5  |
| <b>1.4 Potential involvement of an additional amide ligand</b> .....                                         | S10 |
| <b>1.5 Free energy profiles for various alkenes as well as cyclopentene and allene</b> .....                 | S15 |
| <b>2. Supplementary results for Co-catalyzed coupling reaction between benzamides and ACPs</b> .....         | S21 |
| <b>2.1 Computational details</b> .....                                                                       | S21 |
| <b>2.2 Results for the 1,2-insertion-<i>E</i></b> .....                                                      | S21 |
| <b>2.2.1 Free energy profiles for the 1,2-insertion-<i>E</i></b> .....                                       | S23 |
| <b>2.2.2 The potential roles of AgOAc</b> .....                                                              | S33 |
| <b>2.2.3 The competing pathway involving <math>\beta</math>-H elimination.</b> ....                          | S36 |
| <b>2.3 The side reaction pathways in 1,2-insertion-<i>E</i></b> .....                                        | S37 |
| <b>2.4 Results for the 1,2-insertion-<i>Z</i></b> .....                                                      | S38 |
| <b>2.5. Results for the 2,1-insertion-<i>Re</i></b> .....                                                    | S40 |
| <b>2.6. Results for the 2,1-insertion-<i>Si</i></b> .....                                                    | S41 |
| <b>3. Calculated energies and imaginary frequencies</b> .....                                                | S43 |
| <b>4. Cartesian coordinates of all optimized structures</b> .....                                            | S56 |

# 1. Supplementary results for radical-type migratory insertion of alkenes into Co–C bonds

## 1.1 Selected reactions

The detailed reaction conditions for cobalt-catalyzed aminoquinoline-directed coupling of  $sp^2$  C–H bonds with various alkenes are summarized in Scheme S1.

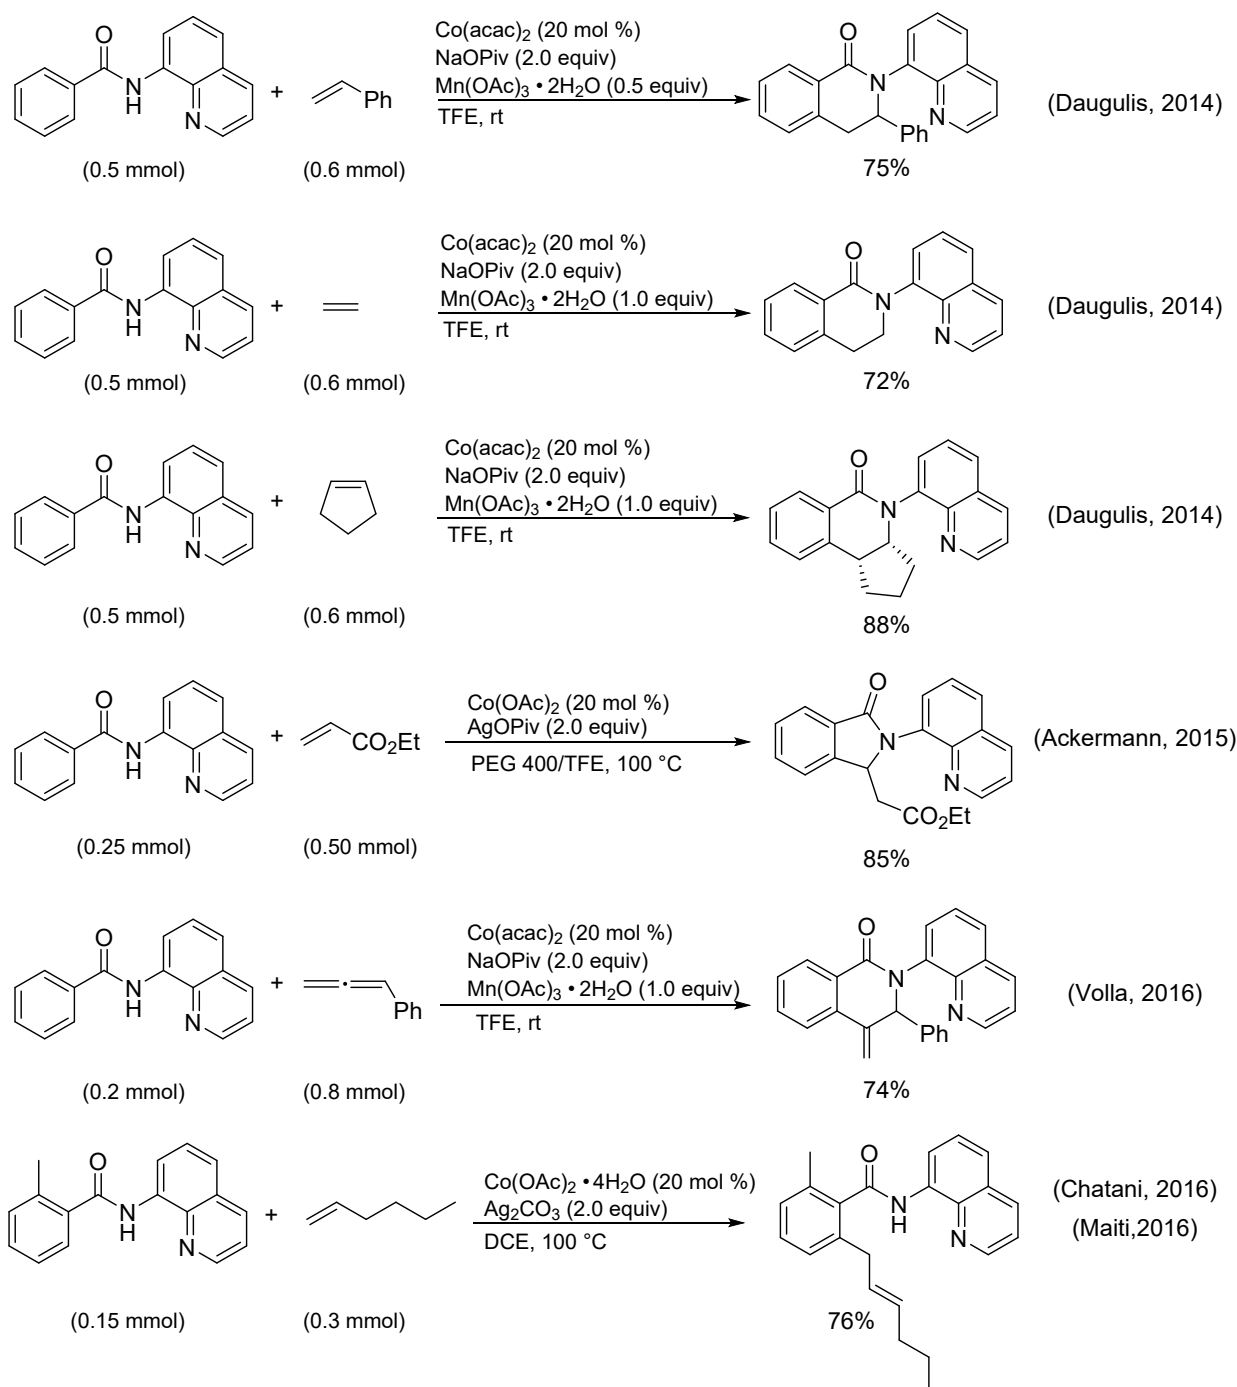

**Scheme S1.** Selected examples of cobalt-catalyzed aminoquinoline-directed coupling of  $sp^2$  C–H bonds with alkenes.

## 1.2 Computational methods and theoretical backgrounds

- Computational details

In this section, all the geometries of the intermediates and transition states for different alkene coupling partners were optimized by Gaussian 09<sup>[1]</sup> in 2,2,2-TriFluoroEthanol (TFE) solvent at the B3LYP<sup>[2]</sup>-D3(BJ)<sup>[3]</sup>/6-31G(d,p)/ECP10MDF(Co) level of theory with the corresponding Stuttgart/Dresden (SDD) effective core potential (ECP) on the transition metals. Frequency calculations were performed at the same theoretical level to verify the nature of the stationary points and to obtain the thermal Gibbs free energy corrections ( $\Delta G_{\text{corr}}$ ) at 298.15 K. Single point calculations at B3LYP-D3(BJ)/def2-TZVP<sup>[4]</sup> were carried out in the gas phase to obtain more accurate electronic energies. The solvent corrections ( $\Delta G_{\text{solv}}$ ) were obtained from the single-point energy difference between gas phase and solution calculations at B3LYP-D3(BJ)/def2-TZVP level. The continuum solvation model SMD<sup>[5]</sup> was utilized to consider the bulk solvent effects. The correction caused by the different standard states in the gas phase and in solution was added to the free energies of all species. Numerical integrations were performed with the ultrafine grid during the calculations.

The 3D diagrams of molecules and the spin density isosurface maps were prepared by CYLview<sup>[6]</sup> and GaussView5.0 respectively. The condensed local softness, atomic charges and spin densities were calculated by Multiwfn 3.8.<sup>[7]</sup>

- Electron spin density

In open-shell systems, the electron spin density is defined as the difference between the densities of electrons with spin  $\alpha$  and those with spin  $\beta$

$$\rho_s(\mathbf{r}) = \rho_\alpha(\mathbf{r}) - \rho_\beta(\mathbf{r}).$$

Information about spin density delocalization can be obtained from the analysis of the corresponding distributions in the spin density map or the computed atomic spin population. The Mulliken spin population analyses were used to calculate the atomic spin population.

- Nucleus-independent chemical shift (NICS)

To investigate the changes of aromaticity during the migratory insertion of ethylene into Co–C bonds, the nucleus-independent chemical shift (NICS)<sup>[8]</sup> values at the ring center NICS(0) were calculated at the B3LYP/def2-SVP level. The negative NICS values denote aromaticity.

- Spin Contamination

The deviation in the expectation value  $\langle \hat{S}^2 \rangle$  from the ideal values is usually used as a quantitative measure of spin contamination in an unrestricted Hartree-Fock wave function. Similarly, the  $\langle \hat{S}^2 \rangle$  values calculated for Kohn–Sham orbitals can be used as qualitative measures of spin contamination.<sup>[9]</sup> It should be noted that the single determinant of Kohn-Sham orbitals is spin-contaminated and this is allowed since this determinant is not the correct wave function for the system.<sup>[10]</sup> For current cobalt systems, the amount of spin contamination in the Kohn–Sham determinant is small in most cases. The  $\langle \hat{S}^2 \rangle$  values for the intermediate having significant diradical character are somewhat larger than the values expected for the triplet (2.0).

### 1.3 Influence of different methods on the free energy profiles, geometries and spin populations

To investigate the influences of different DFT methods on the calculated results, we optimized the **INT1**, **TS** and **INT2** in 2,2,2-TriFluoroEthanol (TFE) solvent by PBE0-D3(BJ),<sup>[11]</sup> M06<sup>[12]</sup> and  $\omega$ B97XD<sup>[13]</sup> functionals in conjunction with 6-31G(d,p)/ECP10MDF(Co) basis set (denoted as BS1) respectively.<sup>[14]</sup> Single point calculations at XC/def2-TZVPP were carried out in the gas phase to obtain more accurate electronic energies. The solvent corrections ( $\Delta G_{\text{solv}}$ ) were obtained from the single-point energy difference between gas phase and solution calculations at XC/def2-TZVPP level. The continuum solvation model SMD was utilized to consider the bulk solvent effects. The overall free energies at each functional can be summarized as

$$G_{\text{XC}} = \Delta G_{\text{corr, XC/BS1}} + \Delta G_{\text{solv, XC/BS2}} + E_{\text{XC/BS2}},$$

where XC represents B3LYP-D3(BJ), PBE0-D3(BJ), M06 or  $\omega$ B97XD, BS1 represents 6-31G(d,p)/ECP10MDF(Co) and BS2 represents def2-TZVPP.

The atomic spin populations calculated by different methods, using the wavefunction obtained from the B3LYP-D3(BJ)/6-31G(d,p)/SDD(Co) level, are listed in Table S1. The Mulliken, Lowdin, Becke and Hirshfeld methods provide similar spin population changes during the insertion process.

As shown in Figure S1, the B3LYP-D3(BJ), PBE0-D3(BJ), M06 and  $\omega$ B97XD functionals provide similar energy ordering of the spin states of **INT1** and **TS**. For the resulting insertion intermediate **INT2**, although deviations in the energy ordering of the singlet and quintet states were observed in these methods, the calculated results of these methods all reveal that the triplet is the most stable spin state.

The optimized structures and the calculated spin populations obtained by B3LYP-D3(BJ), PBE0-D3(BJ) and M06 methods are depicted in Figure S2. The three methods provide similar geometry changes and spin population changes during the migratory insertion of ethylene into Co–C bond.

The electronic energies and bond distances obtained by the PBE0-D3 and M06 methods along the minimum energy paths of the triplet and singlet states are given in Figure S3. The results of the two methods again demonstrate that the bond-making/breaking processes in the radical-type insertion is asynchronous, while the corresponding processes occur synchronously in the typical mechanism. The calculated NICS(0) along the minimum energy paths of the triplet and singlet states also demonstrate the substantial differences between the two insertion mechanisms (Figure S4).

**Table S1.** The atomic spin populations calculated by different methods, using the wavefunction obtained from the B3LYP-D3(BJ)/6-31G(d,p)/SDD(Co) level.

|                                                                                                                  | Mulliken method                                                          | Lowdin method                                                            | Becke method                                                             | Hirshfeld method                                                         |
|------------------------------------------------------------------------------------------------------------------|--------------------------------------------------------------------------|--------------------------------------------------------------------------|--------------------------------------------------------------------------|--------------------------------------------------------------------------|
| <p><b>INT1<sub>T</sub></b></p> 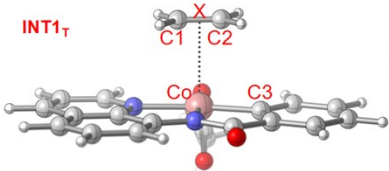 | <p>Spin populations:<br/>Co: 2.07; C3: -0.19</p>                         | <p>Spin populations:<br/>Co: 2.01; C3: -0.15</p>                         | <p>Spin populations:<br/>Co: 2.00; C3: -0.13</p>                         | <p>Spin populations:<br/>Co: 1.98; C3: -0.13</p>                         |
| <p><b>TS<sub>T</sub></b></p>    | <p>Spin populations:<br/>Co: 2.19; C3: -0.24<br/>C2: 0.11; C1: -0.30</p> | <p>Spin populations:<br/>Co: 2.13; C3: -0.19<br/>C2: 0.08; C1: -0.24</p> | <p>Spin populations:<br/>Co: 2.10; C3: -0.16<br/>C2: 0.06; C1: -0.20</p> | <p>Spin populations:<br/>Co: 2.10; C3: -0.15<br/>C2: 0.04; C1: -0.18</p> |
| <p><b>INT2<sub>T</sub></b></p>  | <p>Spin populations:<br/>Co: 2.42; C1: -0.55</p>                         | <p>Spin populations:<br/>Co: 2.36; C1: -0.47</p>                         | <p>Spin populations:<br/>Co: 2.31; C1: -0.38</p>                         | <p>Spin populations:<br/>Co: 2.32; C1: -0.37</p>                         |

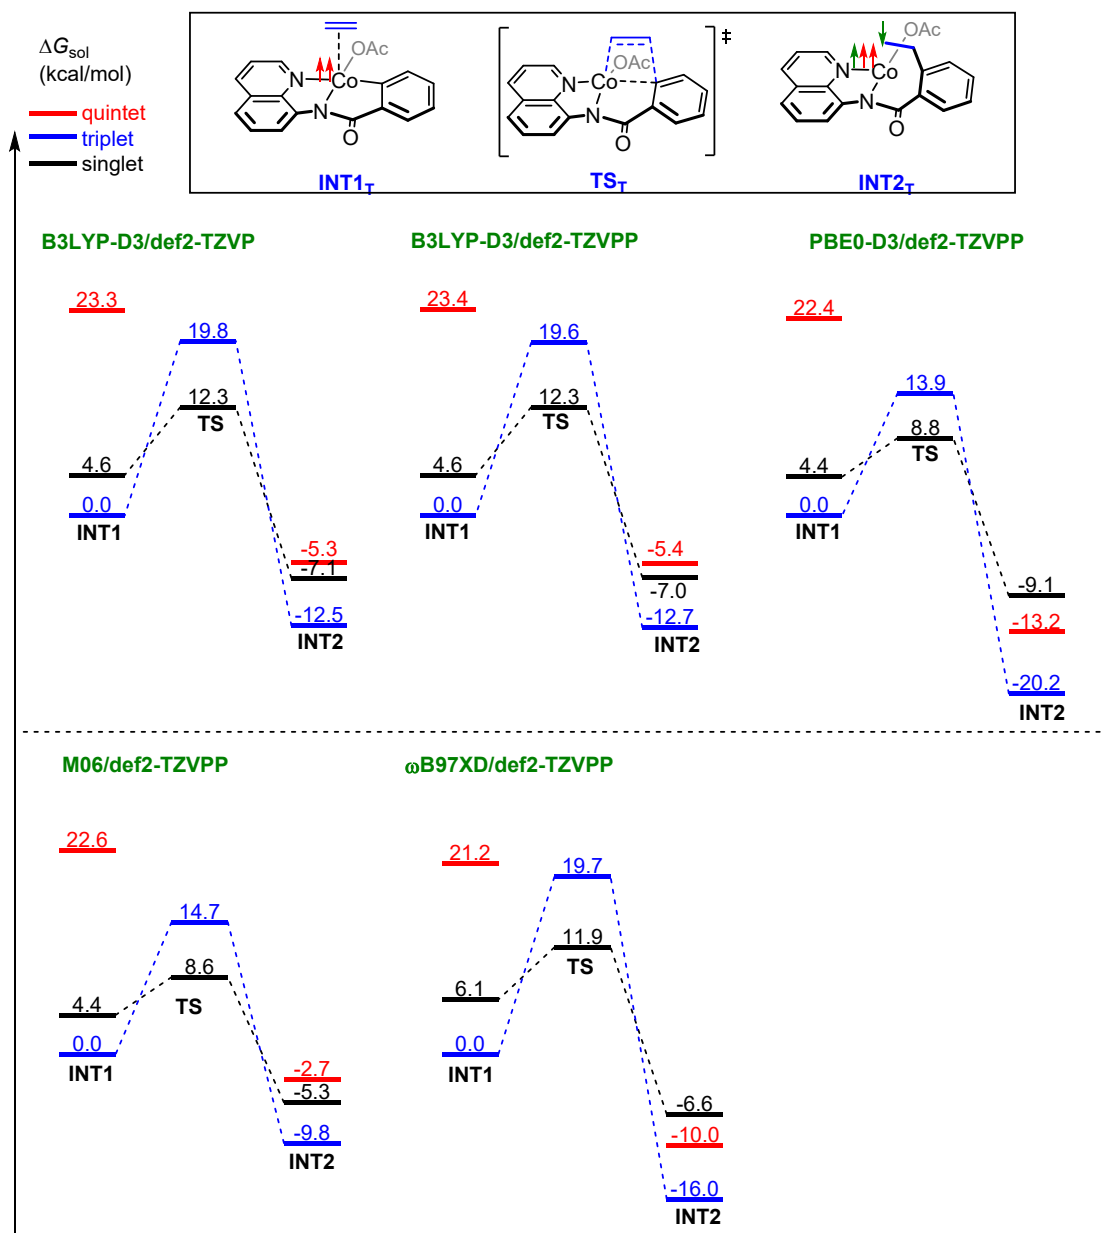

**Figure S1.** Free energy profiles for the migratory insertion of ethylene into Co–C bonds calculated at different levels. All energies are with respect to the  $\text{INT1}_T$ .

|                                                                                                              | SMD(TFE)/ <b>B3LYP-D3(BJ)</b> /<br>6-31G(d,p)/SDD                                                                       | SMD(TFE)/ <b>PBE0-D3(BJ)</b> /<br>6-31G(d,p)/SDD                                                                        | SMD(TFE)/ <b>M06</b> /<br>6-31G(d,p)/SDD                                                                                |
|--------------------------------------------------------------------------------------------------------------|-------------------------------------------------------------------------------------------------------------------------|-------------------------------------------------------------------------------------------------------------------------|-------------------------------------------------------------------------------------------------------------------------|
| <b>INT1<sub>T</sub></b><br>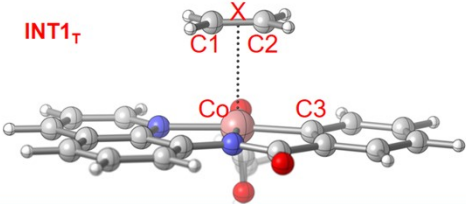 | <b>Bond lengths:</b><br>Co-X : 2.75Å (2.16Å)<br>C1-C2 : 1.34Å (1.36Å)<br>Co-C3 : 1.94Å (1.93Å)                          | <b>Bond lengths:</b><br>Co-X : 2.67Å (2.05Å)<br>C1-C2 : 1.34Å (1.37Å)<br>Co-C3 : 1.93Å (1.92Å)                          | <b>Bond lengths:</b><br>Co-X : 2.56Å (2.02Å)<br>C1-C2 : 1.34Å (1.37Å)<br>Co-C3 : 1.94Å (1.94Å)                          |
|                                                                                                              | <b>Spin populations:</b><br>Co: 2.07; C3: -0.19                                                                         | <b>Spin populations:</b><br>Co: 2.18; C3: -0.26                                                                         | <b>Spin populations:</b><br>Co: 2.02; C3: -0.18                                                                         |
| <b>TS<sub>T</sub></b><br>   | <b>Bond lengths:</b><br>Co-C1: 2.06Å (1.97Å)<br>C1-C2 : 1.41Å (1.42Å)<br>C2-C3 : 2.02Å (2.02Å)<br>Co-C3 : 2.10Å (2.02Å) | <b>Bond lengths:</b><br>Co-C1: 2.08Å (1.96Å)<br>C1-C2 : 1.40Å (1.41Å)<br>C2-C3 : 2.07Å (2.02Å)<br>Co-C3 : 2.07Å (1.98Å) | <b>Bond lengths:</b><br>Co-C1: 2.04Å (1.96Å)<br>C1-C2 : 1.41Å (1.41Å)<br>C2-C3 : 2.02Å (2.04Å)<br>Co-C3 : 2.03Å (1.98Å) |
|                                                                                                              | <b>Spin populations:</b><br>Co: 2.19; C3: -0.24<br>C2: 0.11; C1: -0.30                                                  | <b>Spin populations:</b><br>Co: 2.30; C3: -0.31<br>C2: 0.14; C1: -0.32                                                  | <b>Spin populations:</b><br>Co: 2.08; C3: -0.20<br>C2: 0.10; C1: -0.24                                                  |
| <b>INT2<sub>T</sub></b><br> | <b>Bond lengths:</b><br>Co-C1: 2.08Å (1.91Å)<br>C1-C2 : 1.51Å (1.53Å)<br>C2-C3 : 1.52Å (1.53Å)                          | <b>Bond lengths:</b><br>Co-C1: 2.09Å (1.90Å)<br>C1-C2 : 1.50Å (1.52Å)<br>C2-C3 : 1.51Å (1.52Å)                          | <b>Bond lengths:</b><br>Co-C1: 2.11Å (1.91Å)<br>C1-C2 : 1.50Å (1.51Å)<br>C2-C3 : 1.51Å (1.53Å)                          |
|                                                                                                              | <b>Spin populations:</b><br>Co: 2.42; C1: -0.55                                                                         | <b>Spin populations:</b><br>Co: 2.54; C1: -0.63                                                                         | <b>Spin populations:</b><br>Co: 2.54; C1: -0.65                                                                         |

**Figure S2.** The optimized structures and spin populations obtained by B3LYP-D3(BJ), PBE0-D3(BJ) and M06 methods respectively. The values for the singlets are given in parentheses.



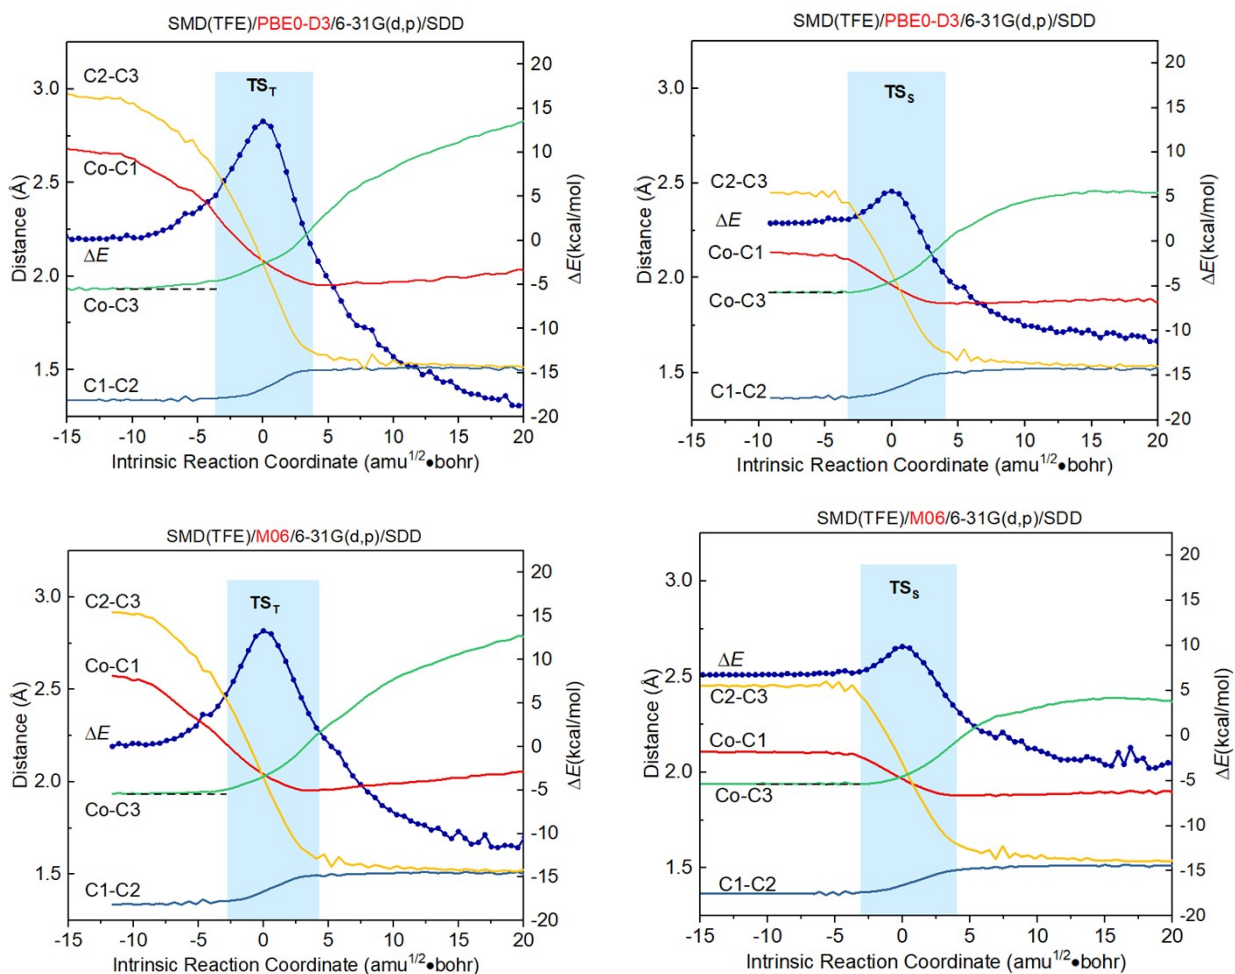

**Figure S3.** Electronic energies and bond distances obtained by the PBE0-D3 and M06 methods along minimum energy paths of the triplet and singlet states.

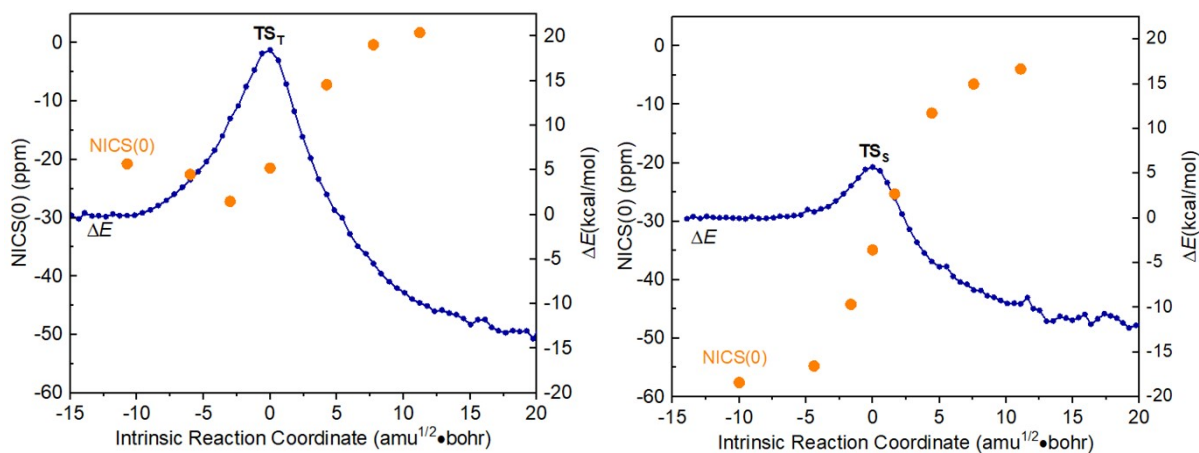

**Figure S4.** The calculated NICS(0) along the minimum energy paths of the triplet and singlet states.

#### 1.4 Potential involvement of an additional amide ligand

Previously, both experimental and computational studies demonstrated that an additional amide unit can coordinate with the metal center as a bis-chelating ligand.<sup>[15]</sup> The free energy profiles in the presence of one and two amide unit are given in Figures S5 and S6 respectively. In TFE solvent, the activation barrier for the C(sp<sup>2</sup>)-H activation in the presence of an additional amide is 5.3 kcal/mol lower than that with the coordination of OAc<sup>-</sup> (**TSD<sub>S</sub>** vs. **TSB<sub>S</sub>**). For the alkene-coordinated complexes, although **INT1\_AQ** is 4.3 kcal/mol more stable than **INT1**, the following migratory insertion of ethylene into Co-C bonds from **INT1** is both kinetically and thermodynamically more favorable (Figure S7). Furthermore, similar energy ordering of the intermediate and transition state and spin population changes were observed during the migratory insertion in the presence of an additional amide ligand (Figure S8).

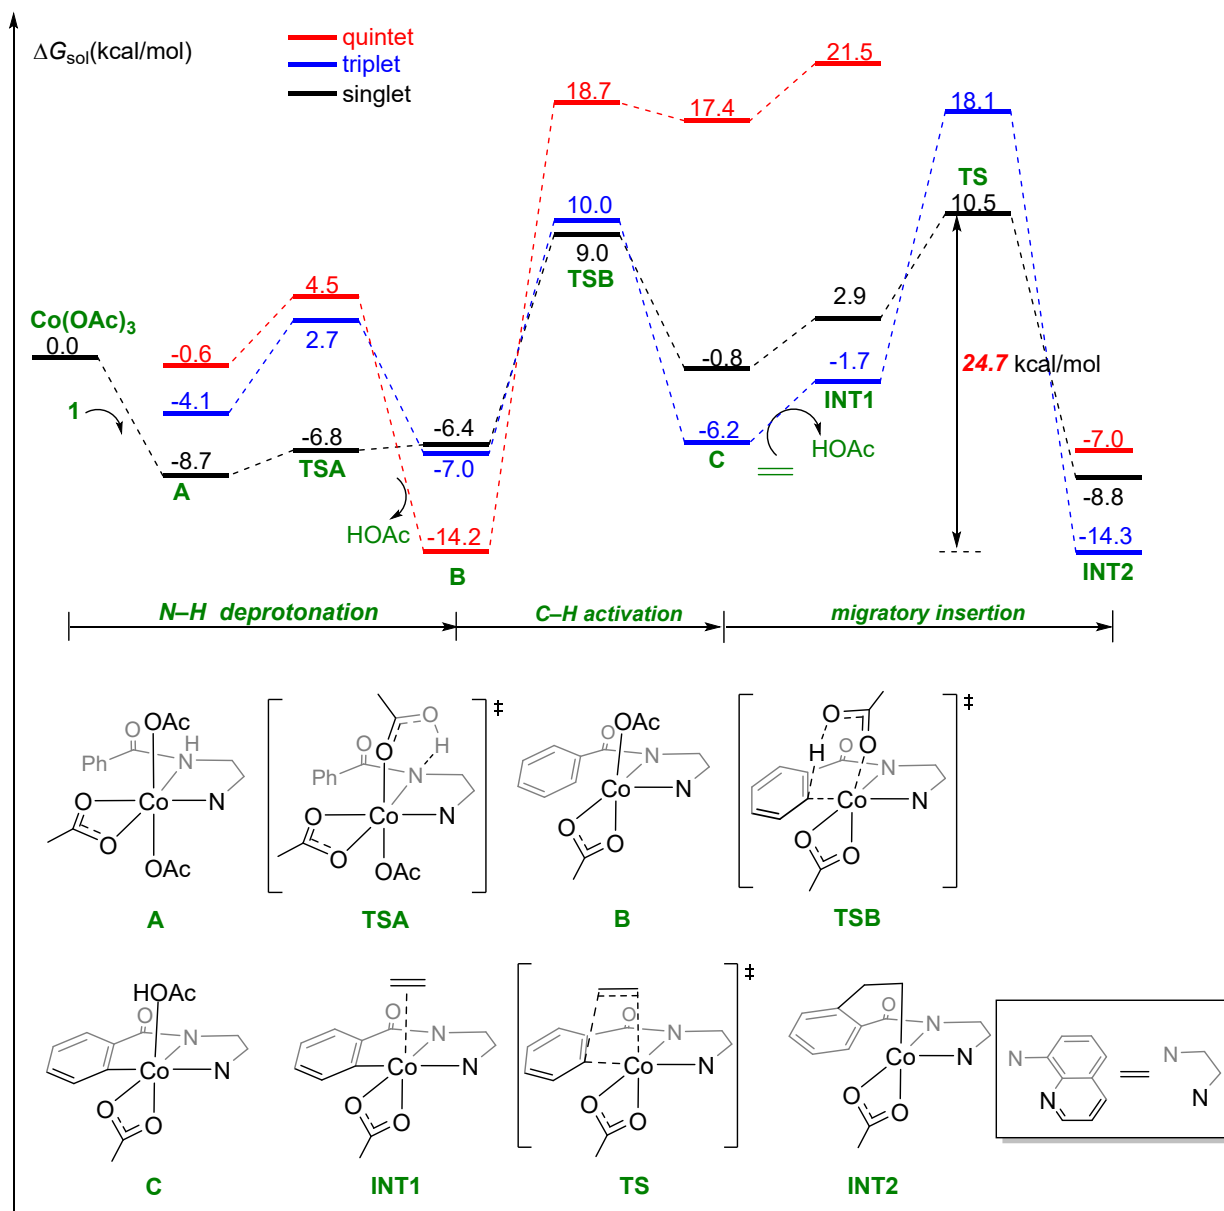

**Figure S5.** Free energy profiles for the N–H deprotonation, C–H activation and migratory insertion with the coordination of  $\text{OAc}^-$  at the SMD(TFE)/B3LYP-D3(BJ)/def2-TZVP//SMD(TFE)/B3LYP-D3(BJ)/6-31G(d,p)/SDD level. All energies are with respect to the  $\text{Co(OAc)}_3$ .

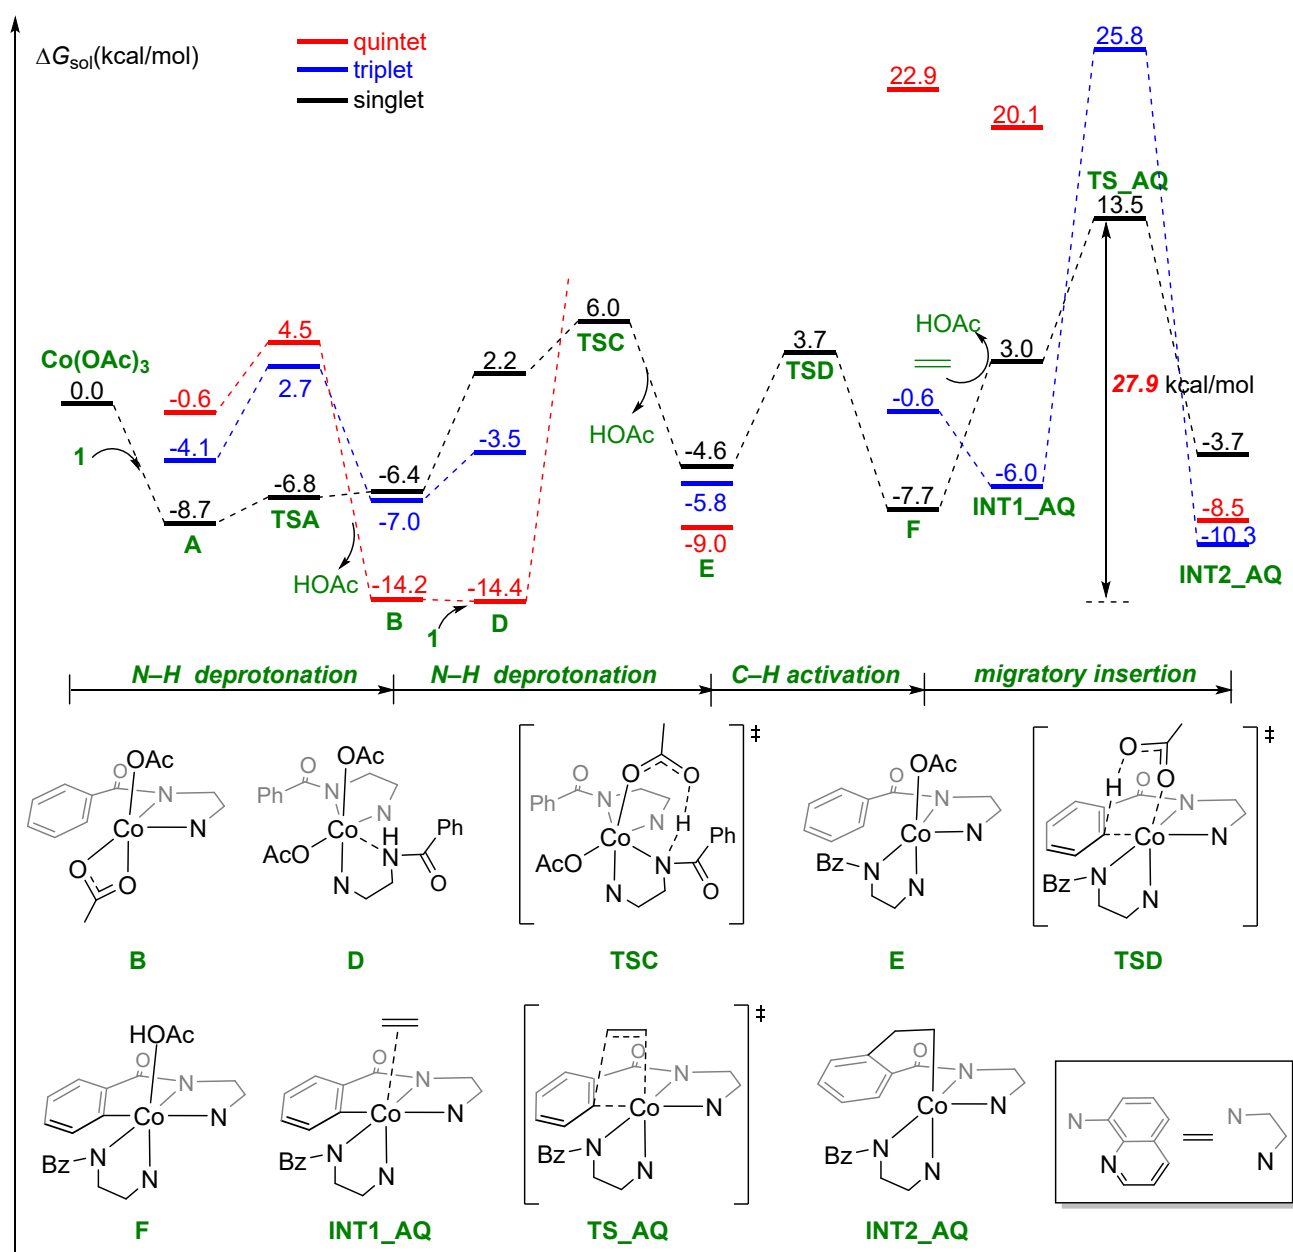

**Figure S6.** Free energy profiles for the N–H deprotonation, C–H activation and migratory insertion with an additional amide as a bis-chelating ligand at the SMD(TFE)/B3LYP-D3(BJ)/def2-TZVP//SMD(TFE)/B3LYP-D3(BJ)/6-31G(d,p)/SDD level. All energies are with respect to the  $\text{Co(OAc)}_3$ .

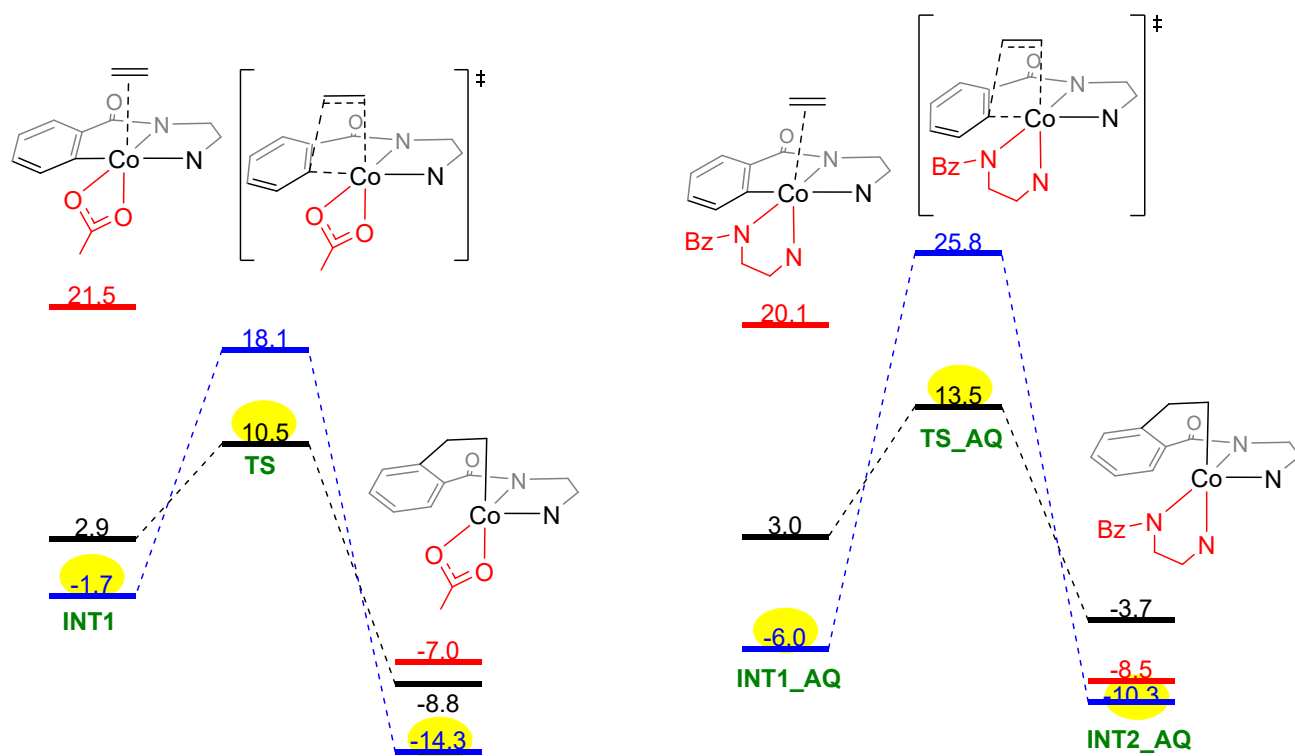

**Figure S7.** Free energy profiles for the migratory insertion of ethylene into Co–C bonds with  $\text{OAc}^-$  or an additional amide as the coordinating ligand. All energies are with respect to the  $\text{Co}(\text{OAc})_3$ .

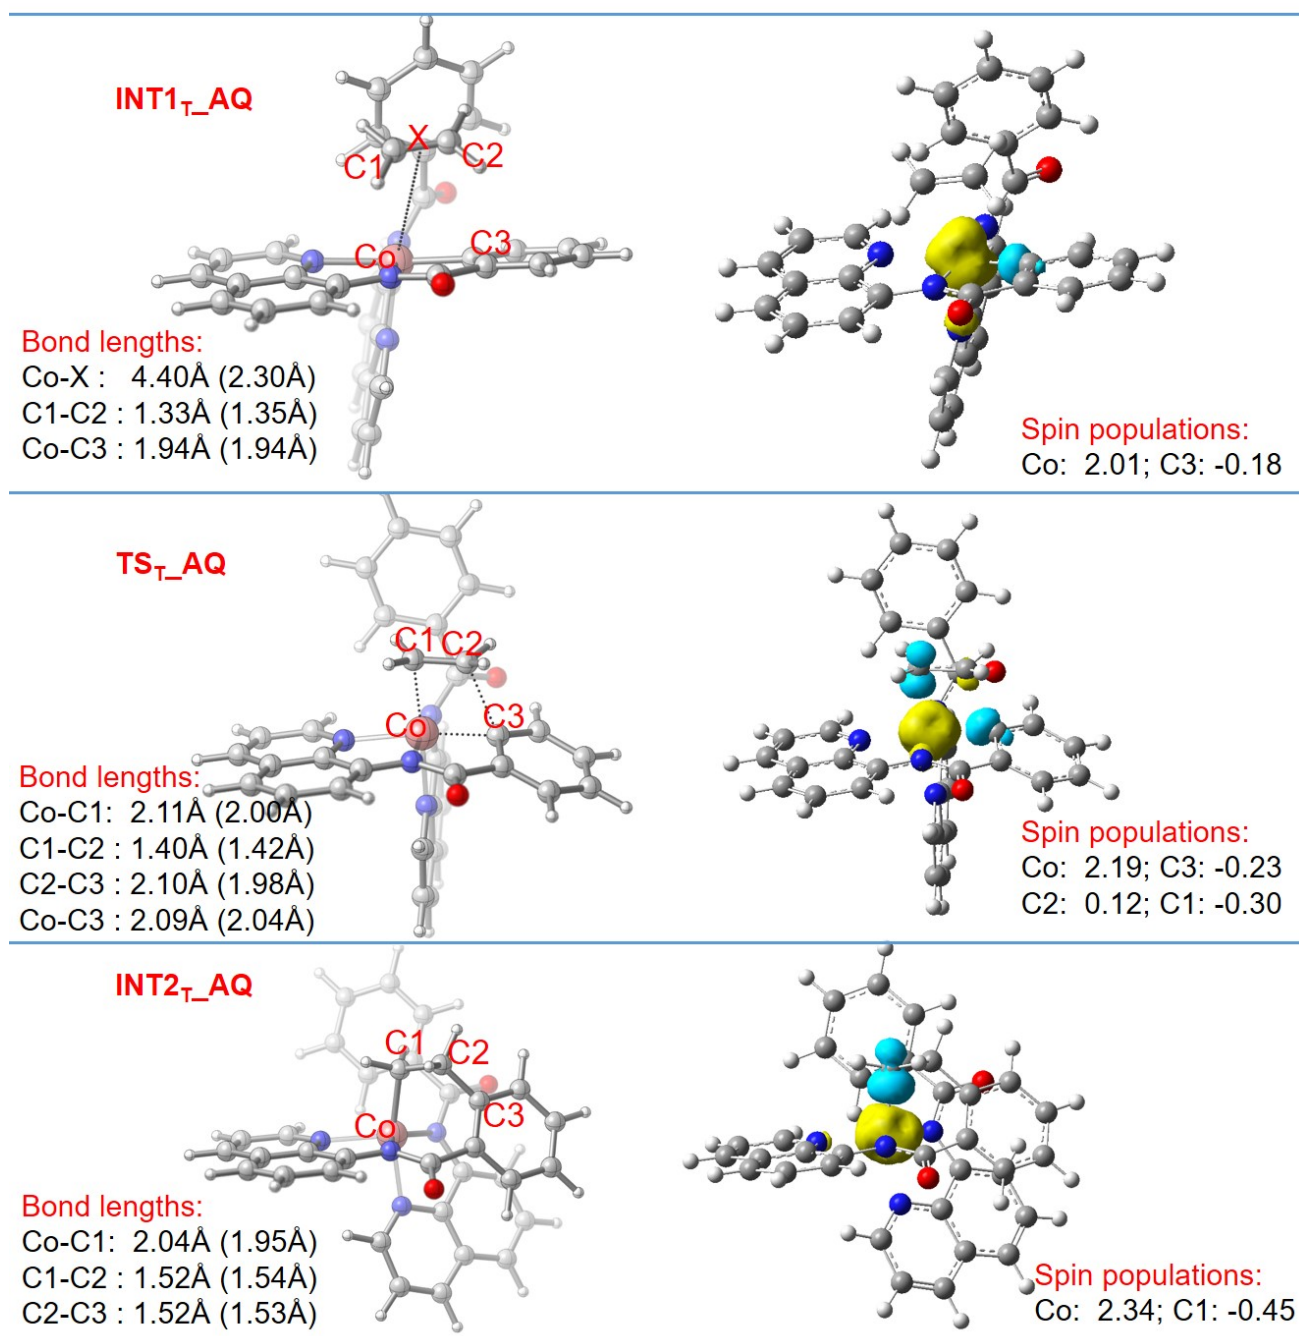

**Figure S8.** The optimized structures and the calculated spin populations in the presence of an additional amide as a bis-chelating ligand. The values for the singlets are given in parentheses.

## 1.5 Free energy profiles for various alkenes as well as cyclopentene and allene

The calculated free energy profiles for migratory insertion step of various monosubstituted alkenes are given in Figure S9. Compared to the results of ethylene, both **INT1** and **TS** exhibit same energy orderings for all the monosubstituted alkenes. The main difference for the alkenes lies in the relative stability of the resulting insertion intermediates. In the case of CO<sub>2</sub>Et, the triplet and quintet states of **INT2** are quite close in energy. Interestingly, the quintet insertion product becomes more stable for styrene. The calculated spin density indicates that the **INT2<sub>Q</sub>** of styrene is actually from quartet Co(II) ferromagnetically coupled with the carbon-centered radical (Figure S10). The calculated free energy profiles for migratory insertion step of cyclopentene and allene are given in Figure S11.

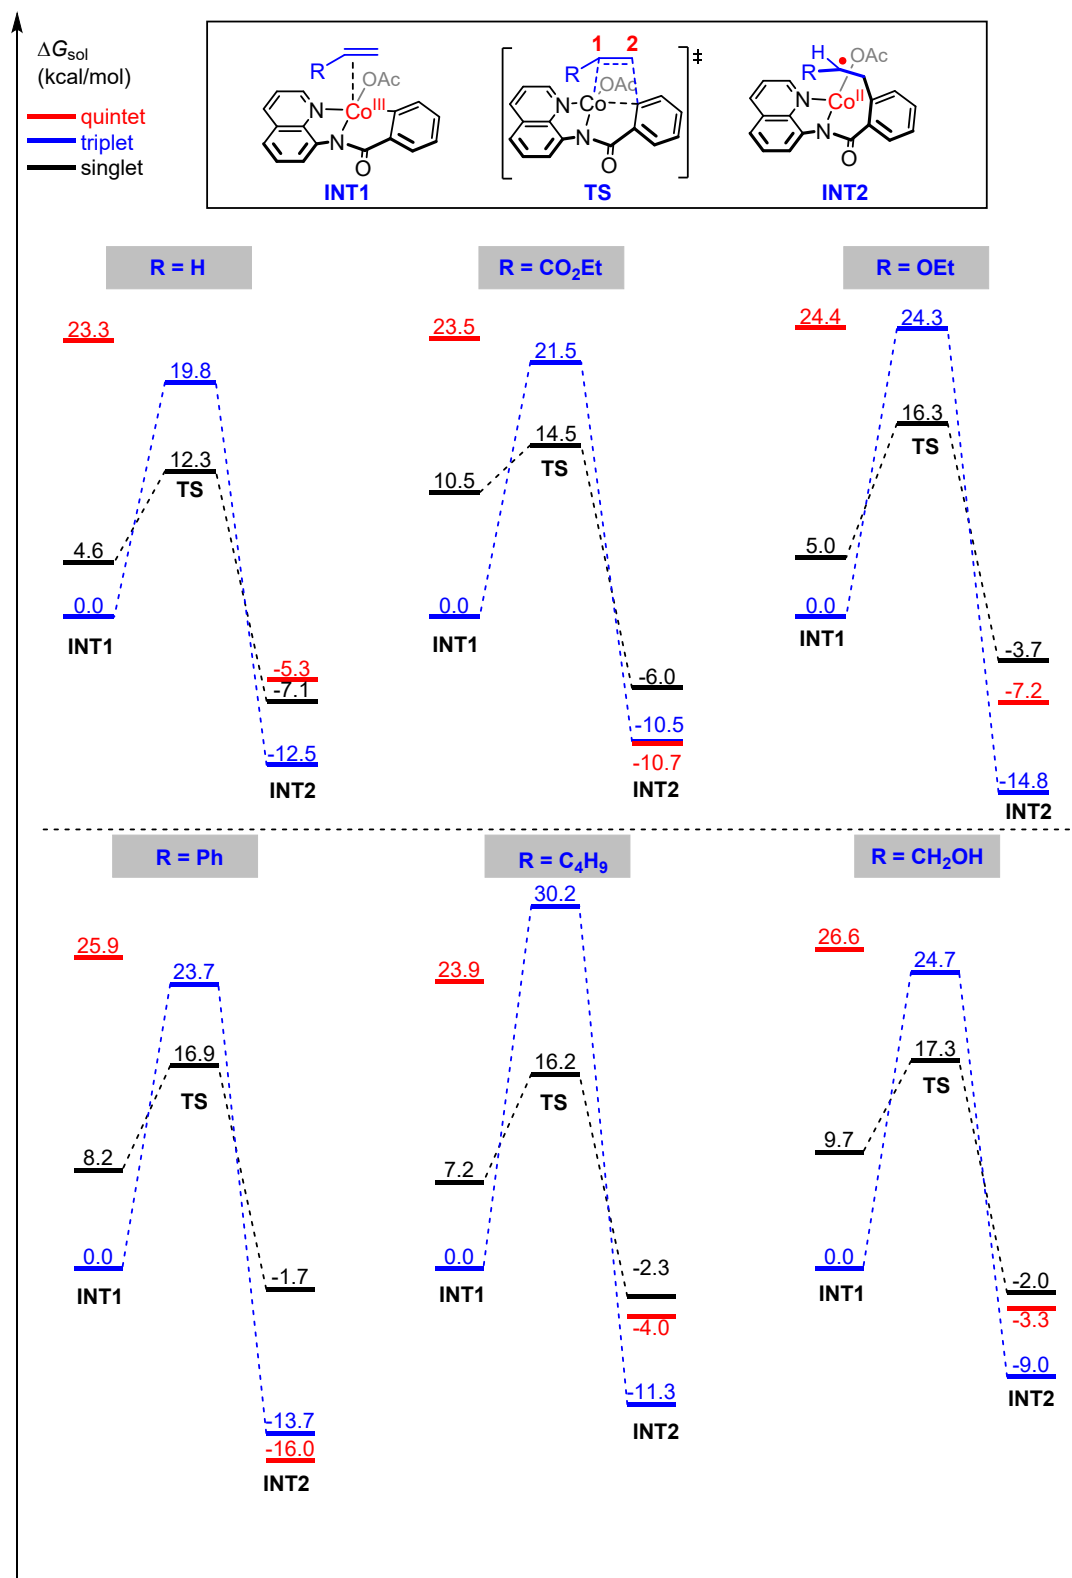

**Figure S9.** Free energy profiles for various monosubstituted alkenes at SMD(TFE)/B3LYP-D3(BJ)/def2-TZVP//SMD(TFE)/B3LYP-D3(BJ)/6-31G(d,p)/SDD level. All energies are with respect to the triplet of the corresponding INT1.



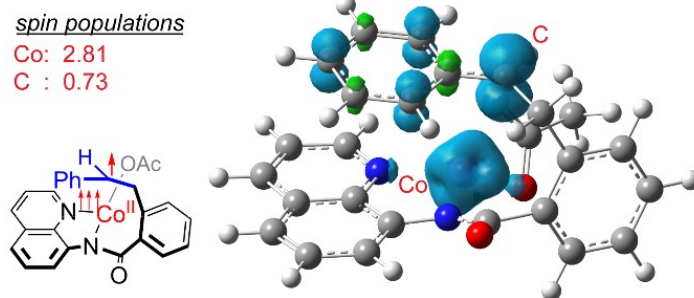

**Figure S10.** The spin density (isovalue=0.01) of INT2<sub>Q</sub> for styrene.

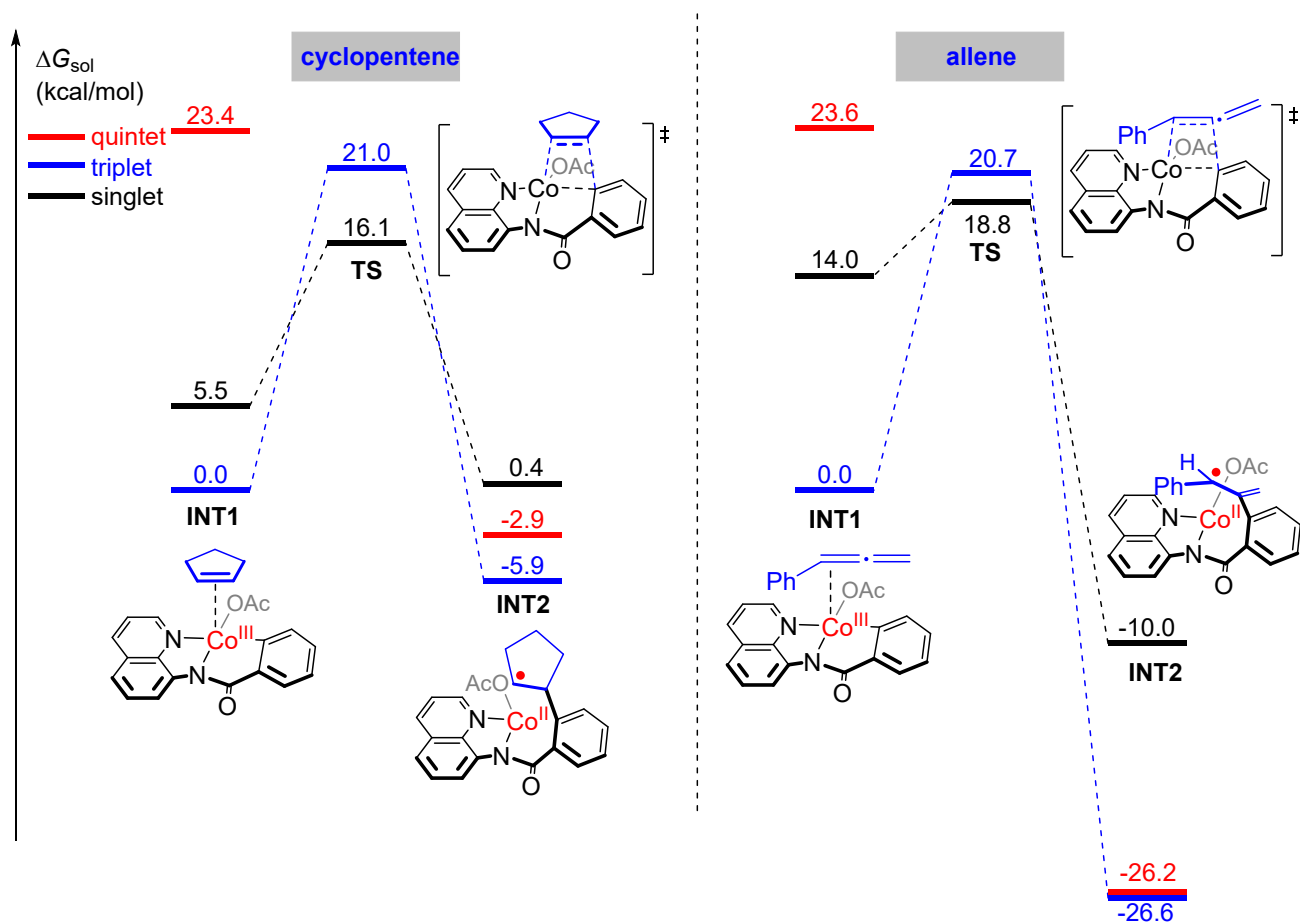

**Figure S11.** Free energy profiles for cyclopentene and allene at SMD(TFE)/B3LYP-D3(BJ)/def2-TZVP// SMD(TFE)/B3LYP-D3(BJ)/6-31G(d,p)/SDD level.

As shown in Figure S12, the activation free energy of the migratory insertion of different types of alkenes  $\Delta G^\ddagger(\text{TS}_S - \text{INT1}_T)$  can be separated into the energy difference between the singlet and triplet of INT1 and the activation free energy of the singlet surface using the following equation :

$$\Delta G^\ddagger(\text{TS}_S - \text{INT1}_T) = \Delta G^\circ(\text{INT1}_S - \text{INT1}_T) + \Delta G^\ddagger(\text{TS}_S - \text{INT1}_S).$$

Herein, we also investigated the possible factors influencing the two terms. As indicated in Figures S13 and S14, a linear correlation can be detected for several alkenes. The correlation of  $\Delta G^\ddagger(\text{TS}_S - \text{INT1}_S)$  with the HOMO energies of alkenes can be explained by the orbital interactions picture. For the alkenes with lower HOMO energies, the energy gap between  $\sigma_{\text{M-C}}$  and  $\pi_{\text{alkene}}$  (HOMO) becomes smaller, resulting in stronger orbital interactions.

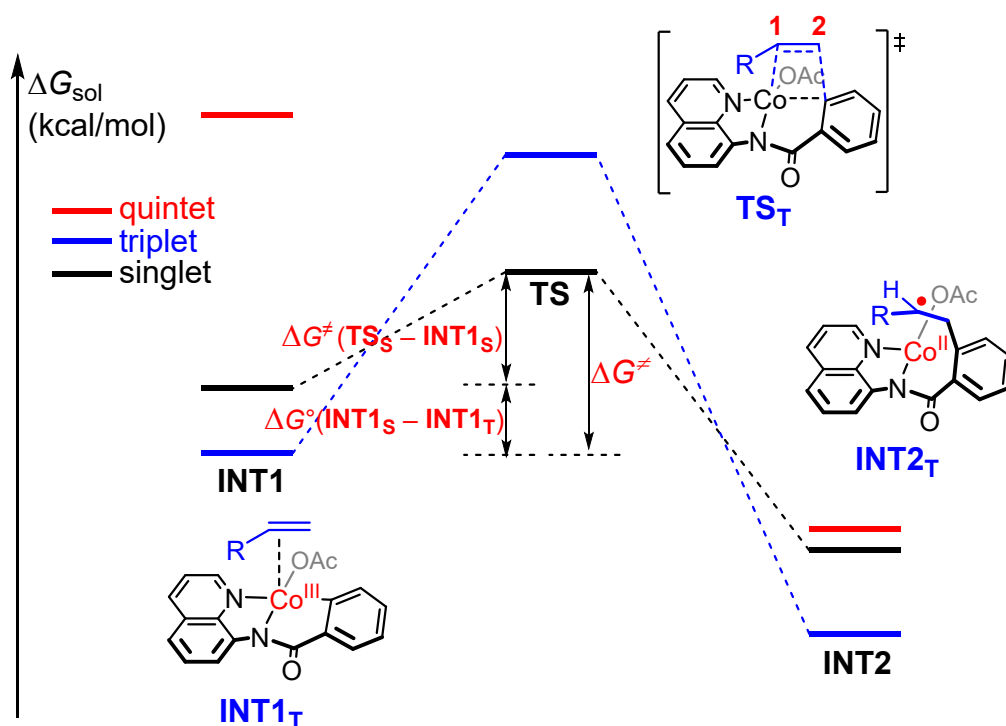

Figure S12. Free energy profiles for the migratory insertion.

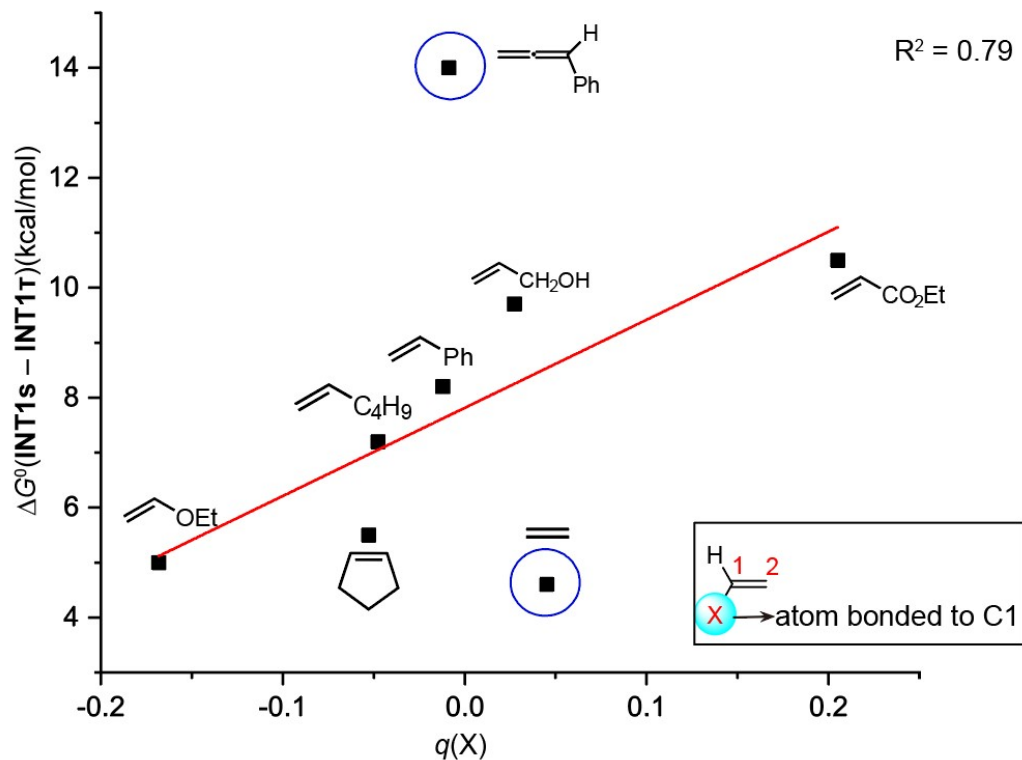

**Figure S13.** Correlation of  $\Delta G^\circ(\text{INT1}_s - \text{INT1}_T)$  with the Hirshfeld charges of the atom bonded to C1 of the different alkenes. It should be noted that the values for ethylene and allene were not included during the linear fitting.

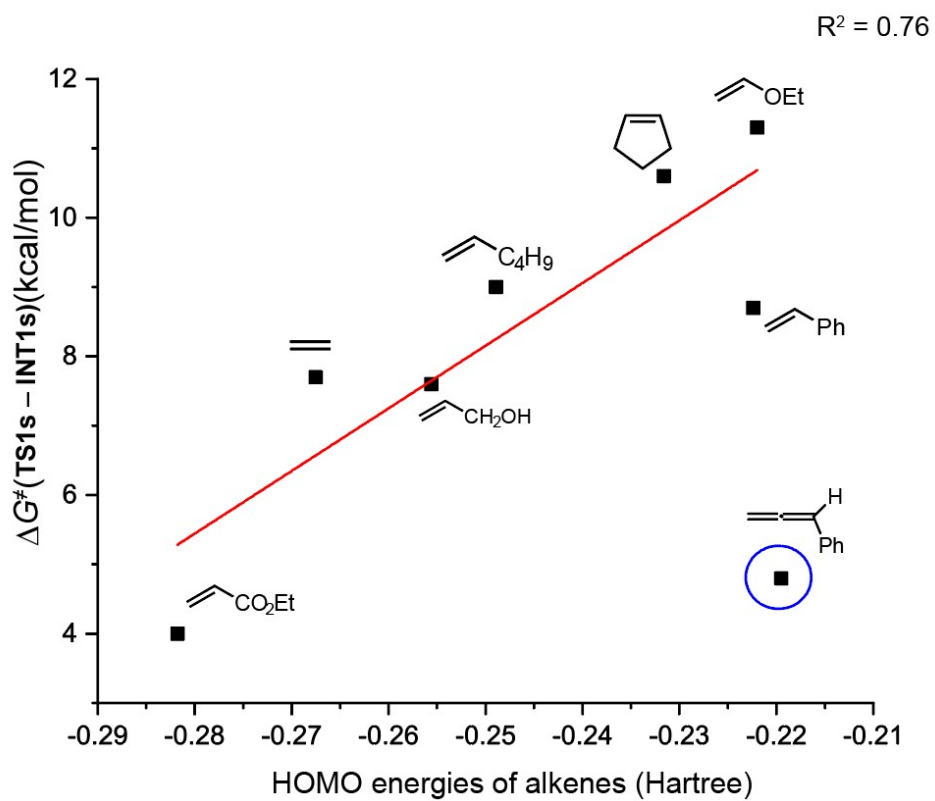

**Figure S14.** Correlation of  $\Delta G^\ddagger(\text{TS}_1\text{s} - \text{INT}_1\text{s})$  with the highest occupied molecular orbital (HOMO) energies of alkenes. It should be noted that the value for allene was not included during the linear fitting.

## 2. Supplementary results for Co-catalyzed coupling reaction between benzamides and ACPs

### 2.1 Computational details

In this section, all the geometries of the intermediates and transition states were optimized by Gaussian 09<sup>[1]</sup> in toluene at the B3LYP<sup>[2]</sup>-D3(BJ)<sup>[3]</sup>/6-31G(d,p)/ECP10MDF(Co) level of theory with the corresponding Stuttgart/Dresden (SDD) effective core potential (ECP) on the transition metals. Frequency calculations were performed at the same theoretical level to verify the nature of the stationary points and to obtain the thermal Gibbs free energy corrections ( $\Delta G_{\text{corr}}$ ) at 423.15 K. Single point calculations at B3LYP-D3(BJ)/def2-TZVP were carried out to obtain more accurate electronic energies. The continuum solvation model SMD was utilized to consider the bulk solvent effects. Numerical integrations were performed with the ultrafine grid during the calculations. During the calculations of the “broken symmetry” (BS) states, the Gaussian 09 procedure (Guess = Fragment = N) was employed. The minimum energy crossing points (MECPs) were searched via sobMECP, which is a modified version of Harvey’s MECP program by Tian Lu.<sup>[16]</sup>

### 2.2 Results for the 1,2-insertion-*E*

The notation “1,2-insertion-*E*” means that the alkene moiety in the intermediate generated by 1,2-insertion and  $\beta$ -C elimination is *E*-alkene (see Scheme S2 for details).

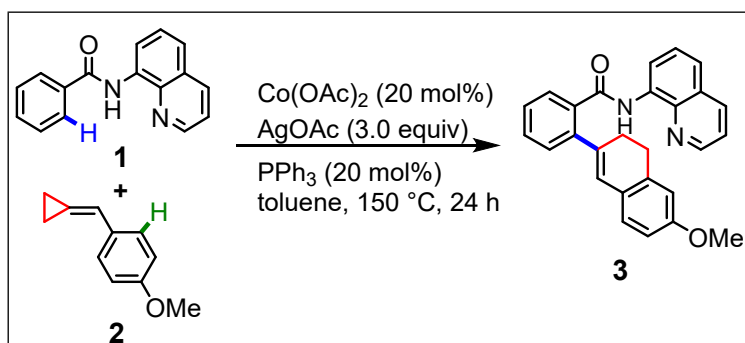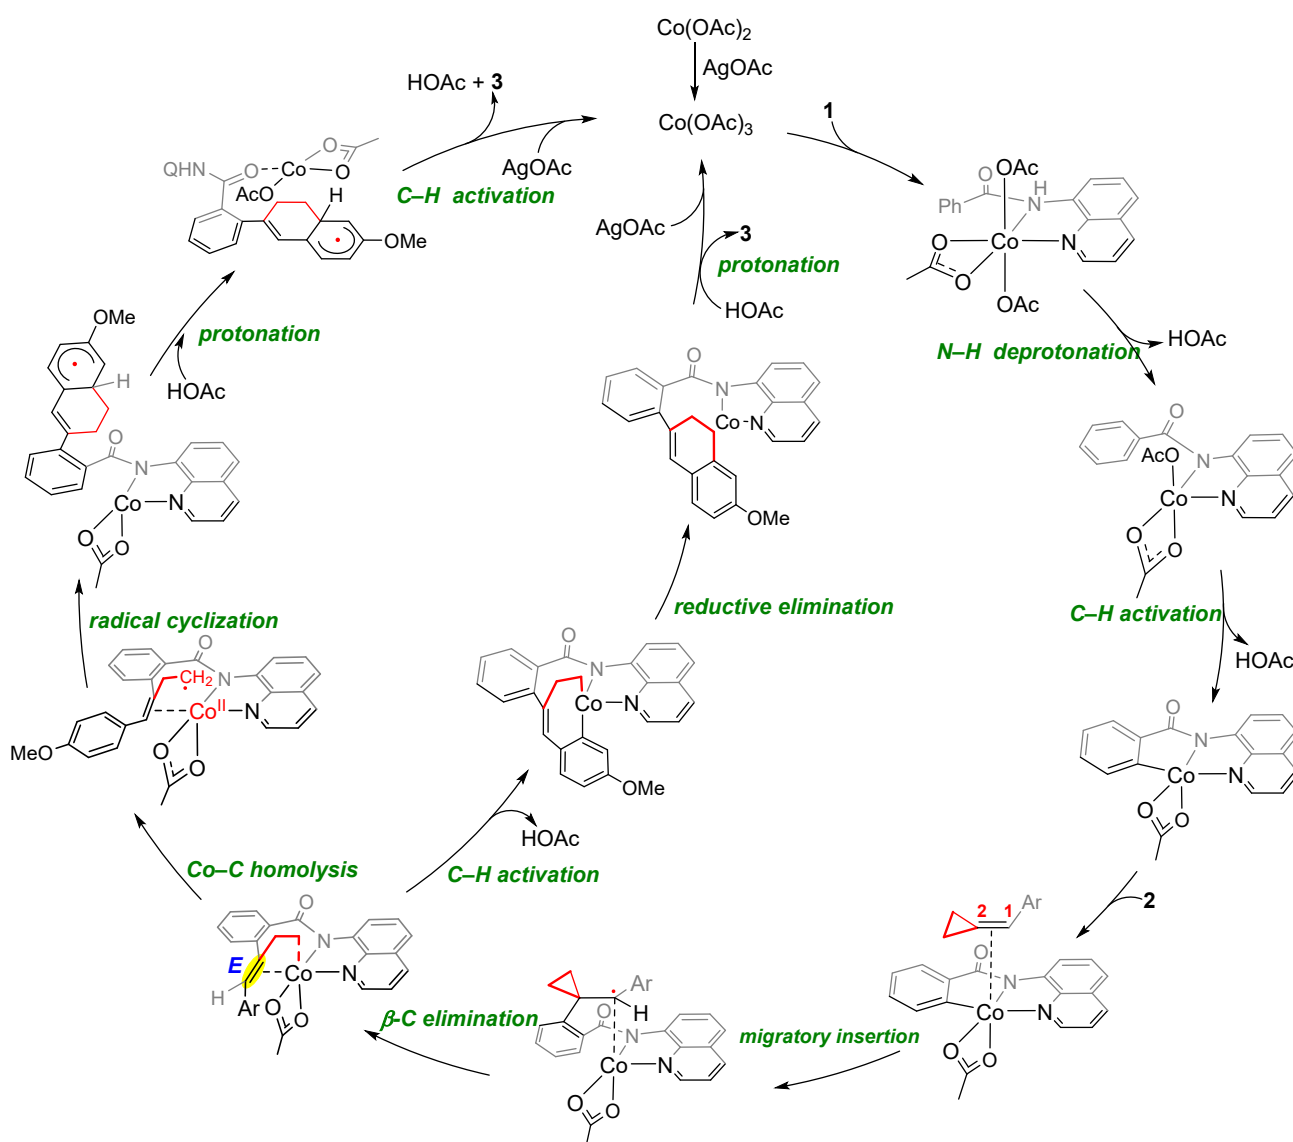

**Scheme S2.** Overall catalytic cycle for Co-catalyzed coupling reaction between benzamides and ACPs.

## 2.2.1 Free energy profiles for the 1,2-insertion-*E*

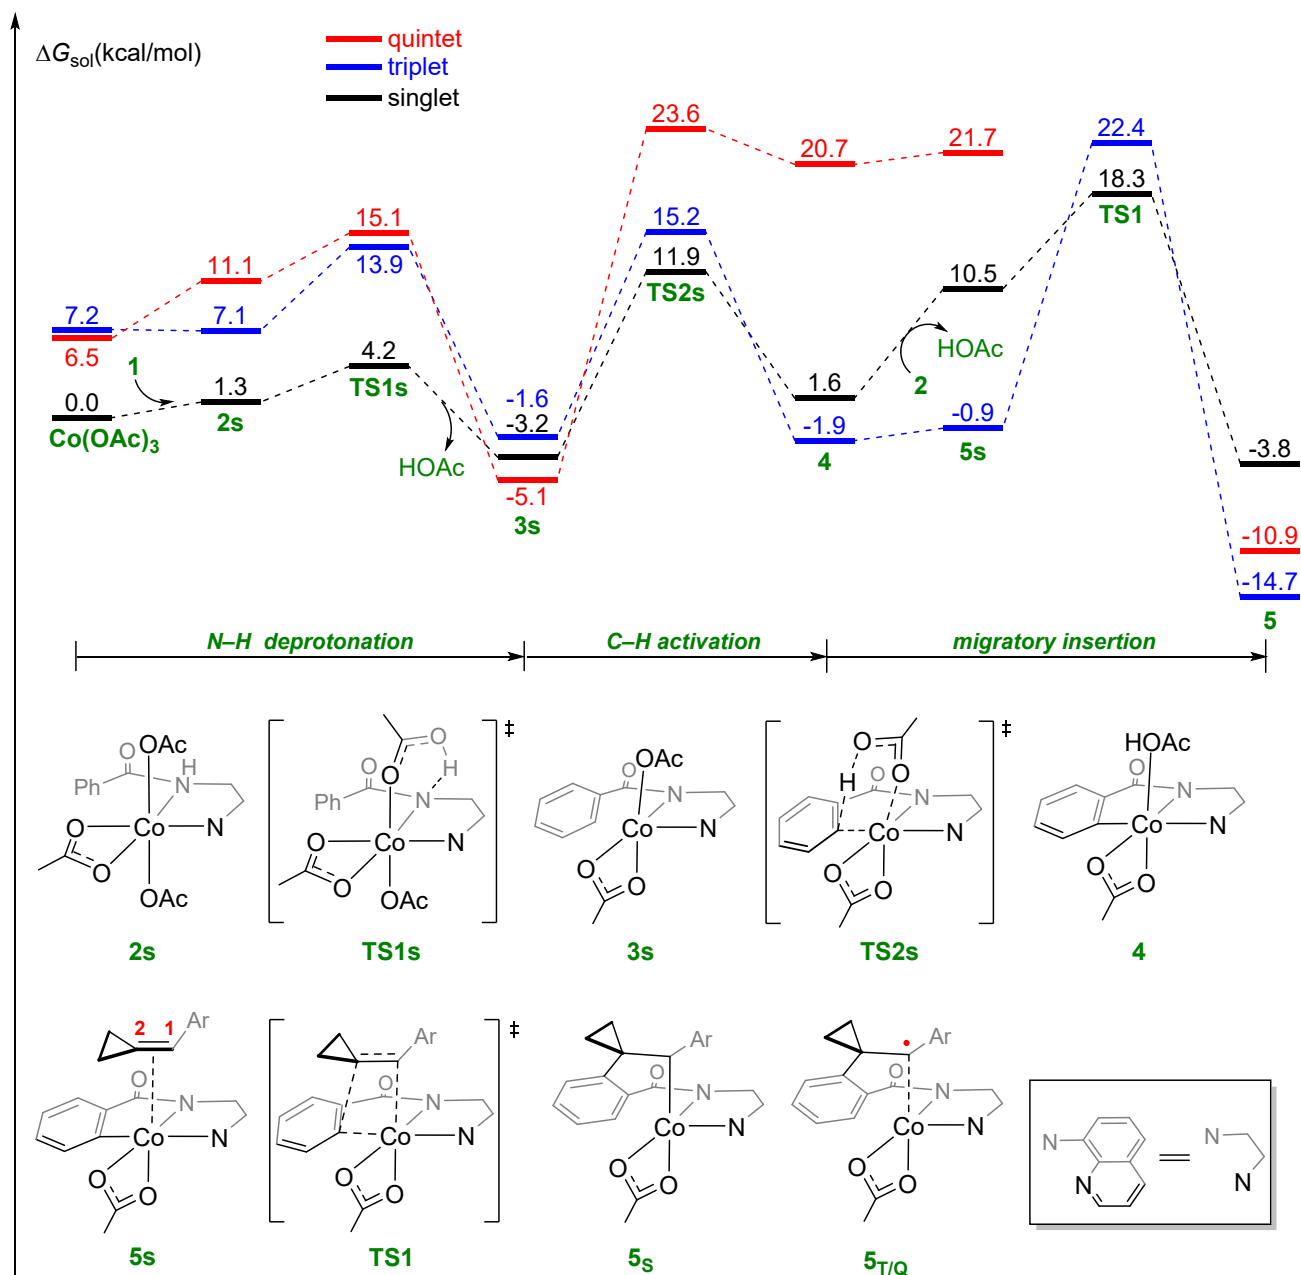

**Figure S15.** Free energy profiles for N-H deprotonation, first C-H activation and migratory insertion steps with the coordination of OAc<sup>-</sup> at SMD(toluene)/B3LYP-D3(BJ)/def2-TZVP//SMD(toluene)/B3LYP-D3(BJ)/6-31G(d,p)/SDD level.

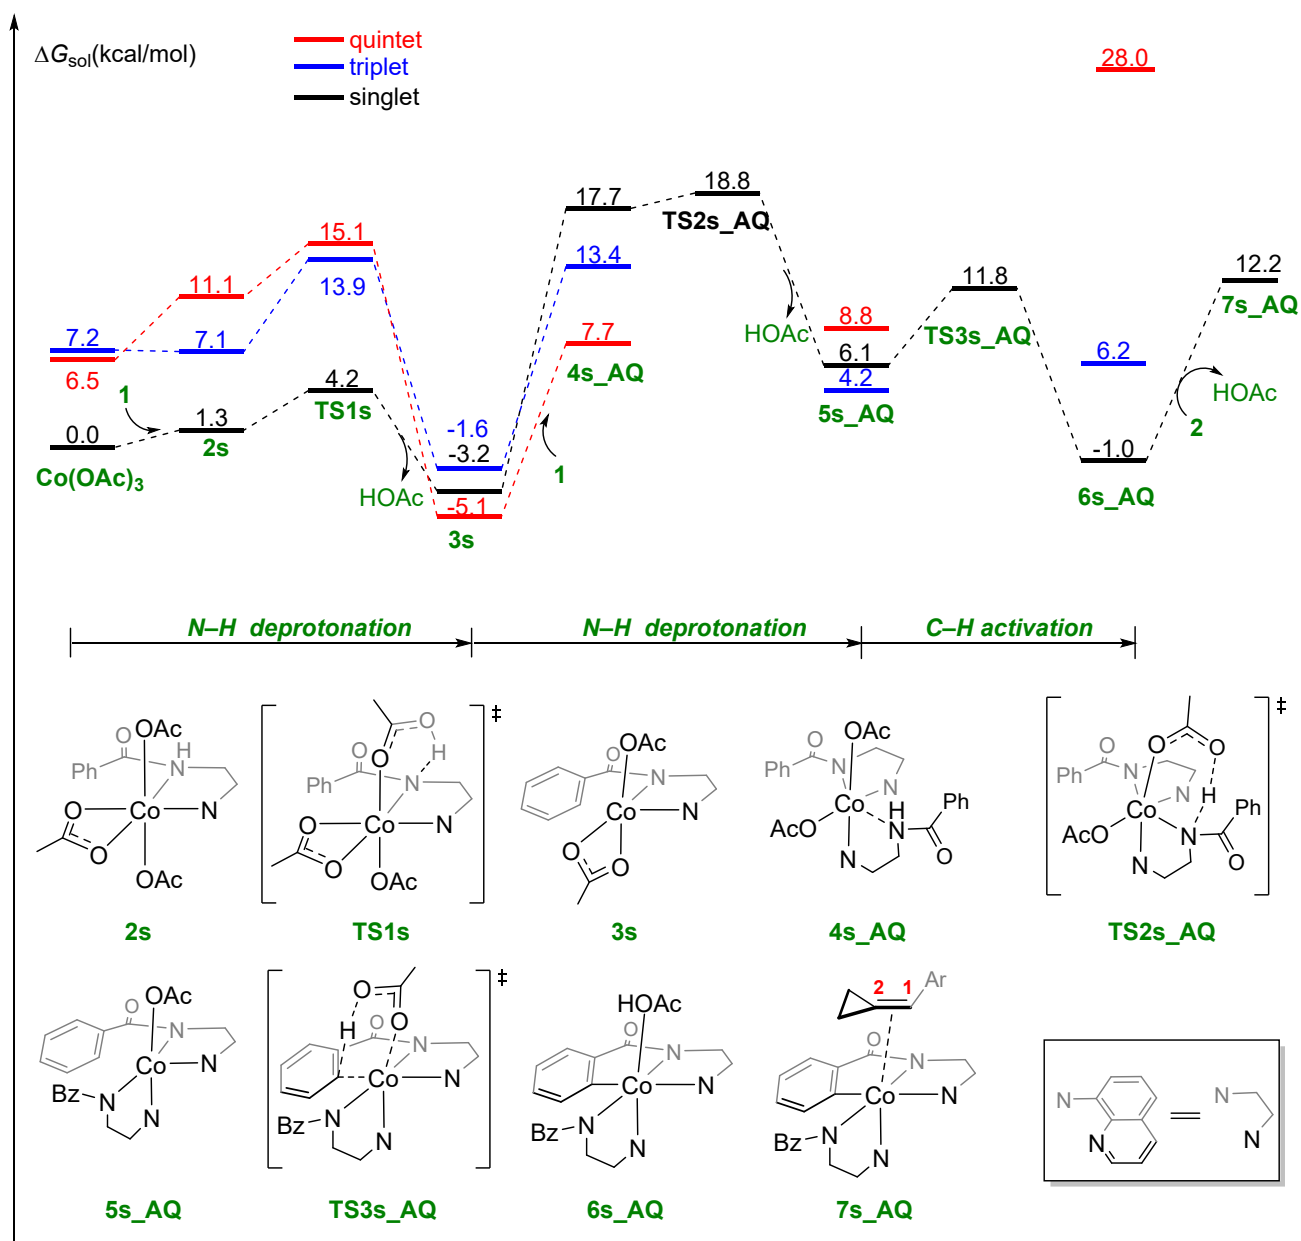

**Figure S16.** Free energy profiles for the N–H deprotonation and C–H activation with an additional amide as a bis-chelating ligand at SMD(toluene)/B3LYP-D3(BJ)/def2-TZVP//SMD(toluene)/B3LYP-D3(BJ)/6-31G(d,p)/SDD level.



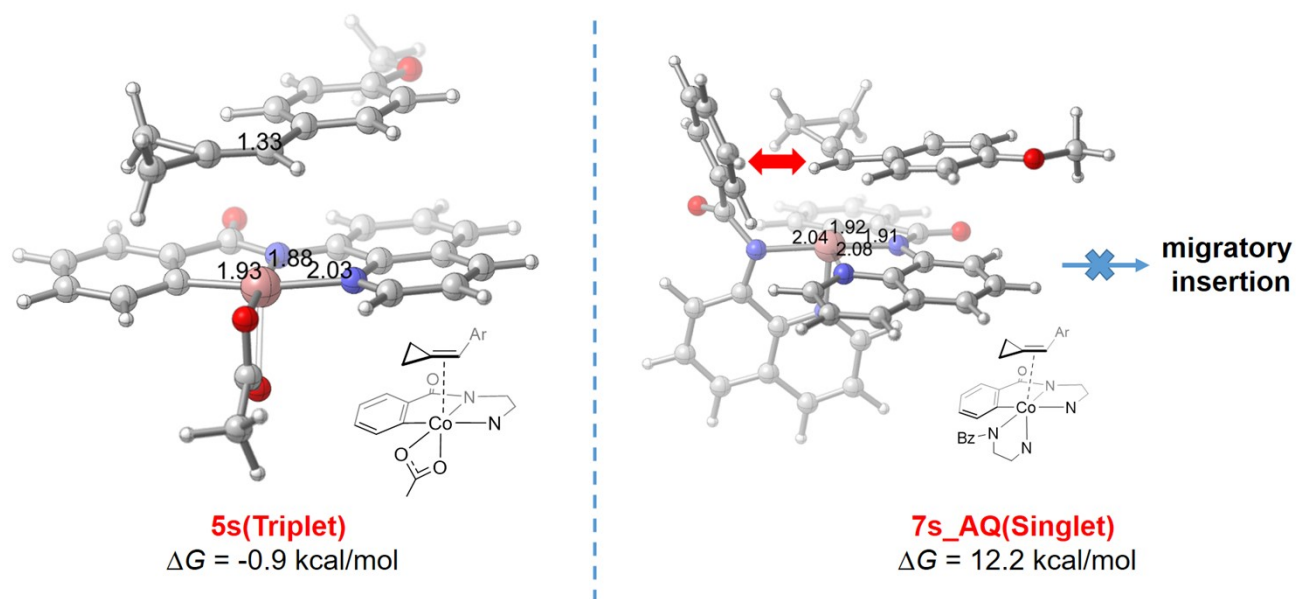

**Figure S17.** Optimized structures of the alkene-coordinated complexes with selected bond distances in Å.

In toluene solvent, as shown in Figures S15 and S16, the activation barrier for the C(sp<sup>2</sup>)-H activation in the presence of an additional amide is almost the same with that in the presence of OAc<sup>-</sup> (**TS3s\_AQ** vs. **TS2s**). However, the transition state of the second N-H deprotonation **TS2s\_AQ** is relatively high in energy. For the alkene-coordinated complexes, the **7s\_AQ(Singlet)** is 13.1 kcal/mol less stable than the counterpart **5s(Triplet)**. More importantly, our calculations indicate that migratory insertion of ACP cannot take place from such bis-ligated intermediate due to the significant steric repulsion between ACP and the additional amide unit (Figure S17).

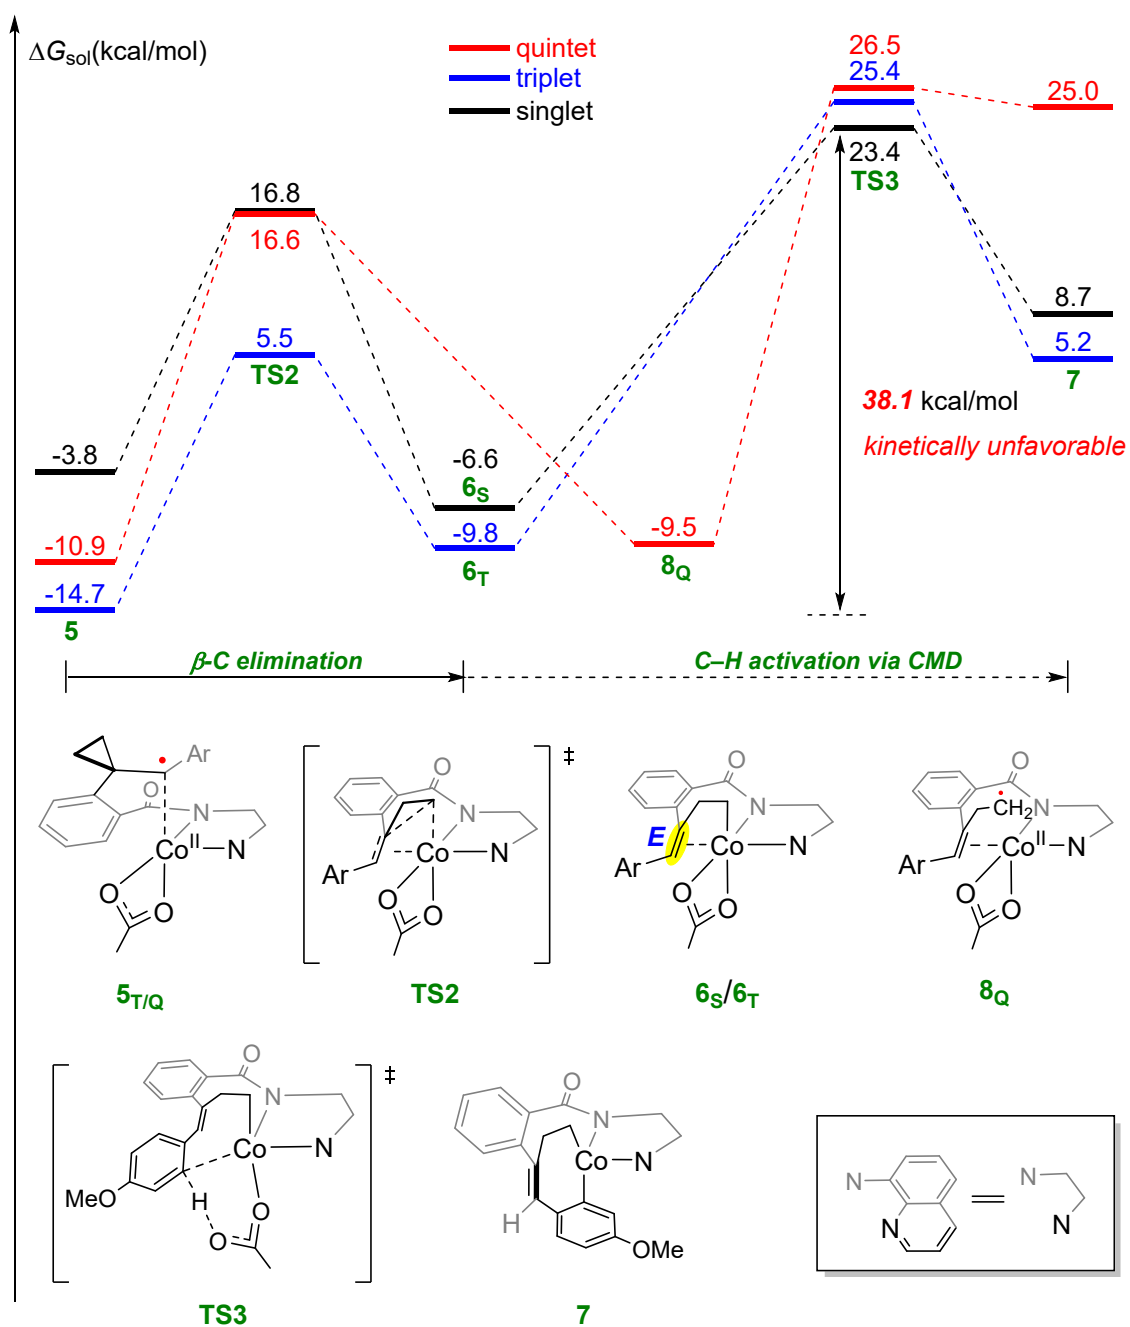

**Figure S18.** Free energy profiles for  $\beta\text{-C}$  elimination and the second C–H activation via CMD mechanism.

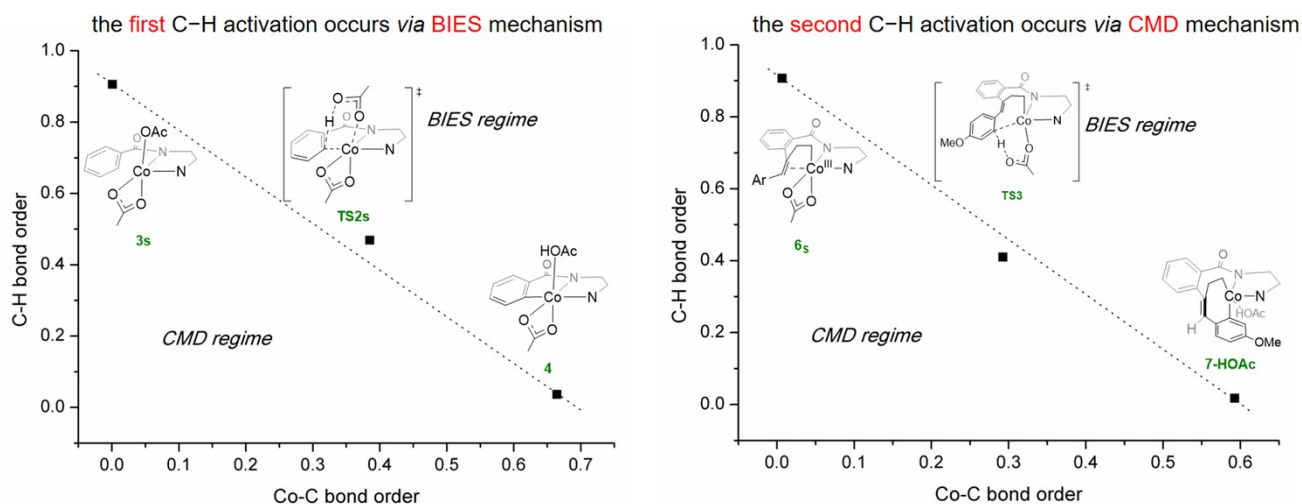

**Figure S19.** More O’Ferrall–Jencks plot for the first and the second C–H activation of the singlet PES.

A detailed Wiberg bond order analysis for both the first and second C–H activation was conducted. As seen from the More O’Ferrall–Jencks plot (Figure S19),<sup>[17]</sup> it became evident that the first C–H cleavage occurs *via* BIES mechanism, while the second C–H cleavage occurs *via* CMD mechanism. It should be noted that the CMD-type transition state **TS3** is kinetically unfavorable (see Figure S18).

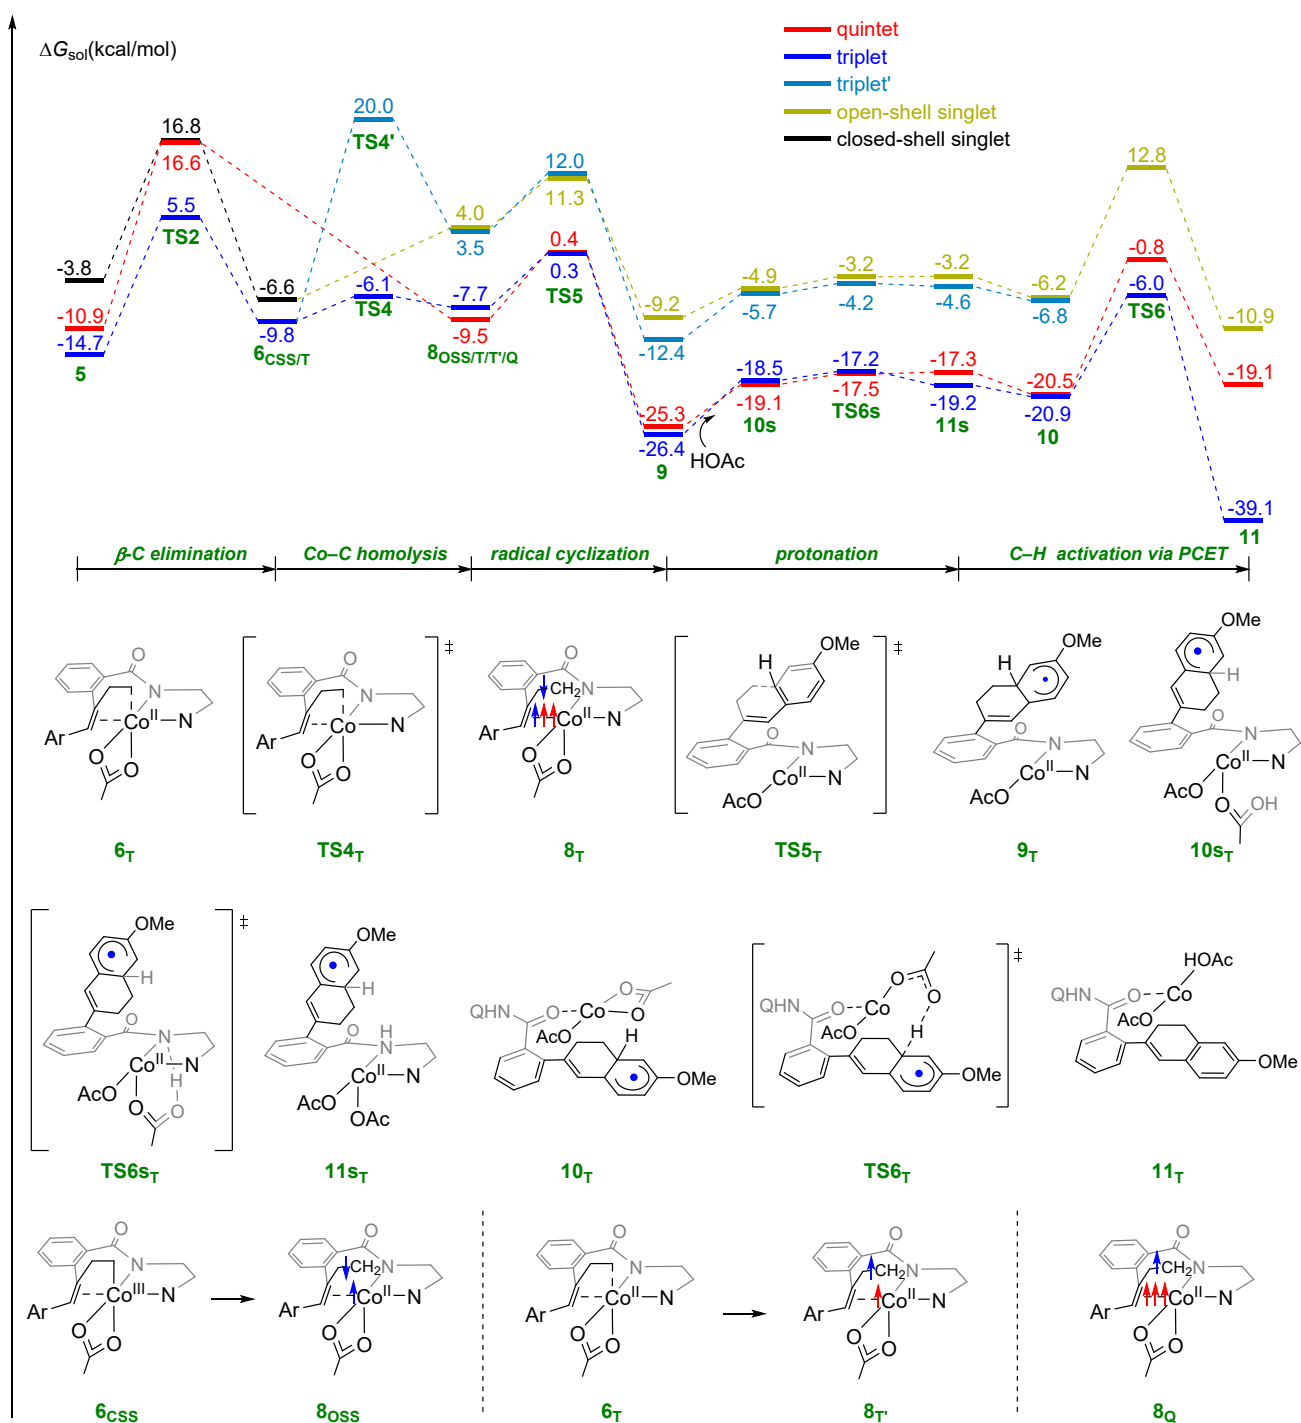

**Figure S20.** Free energy profiles for the favored C–H activation via PCET mechanism.

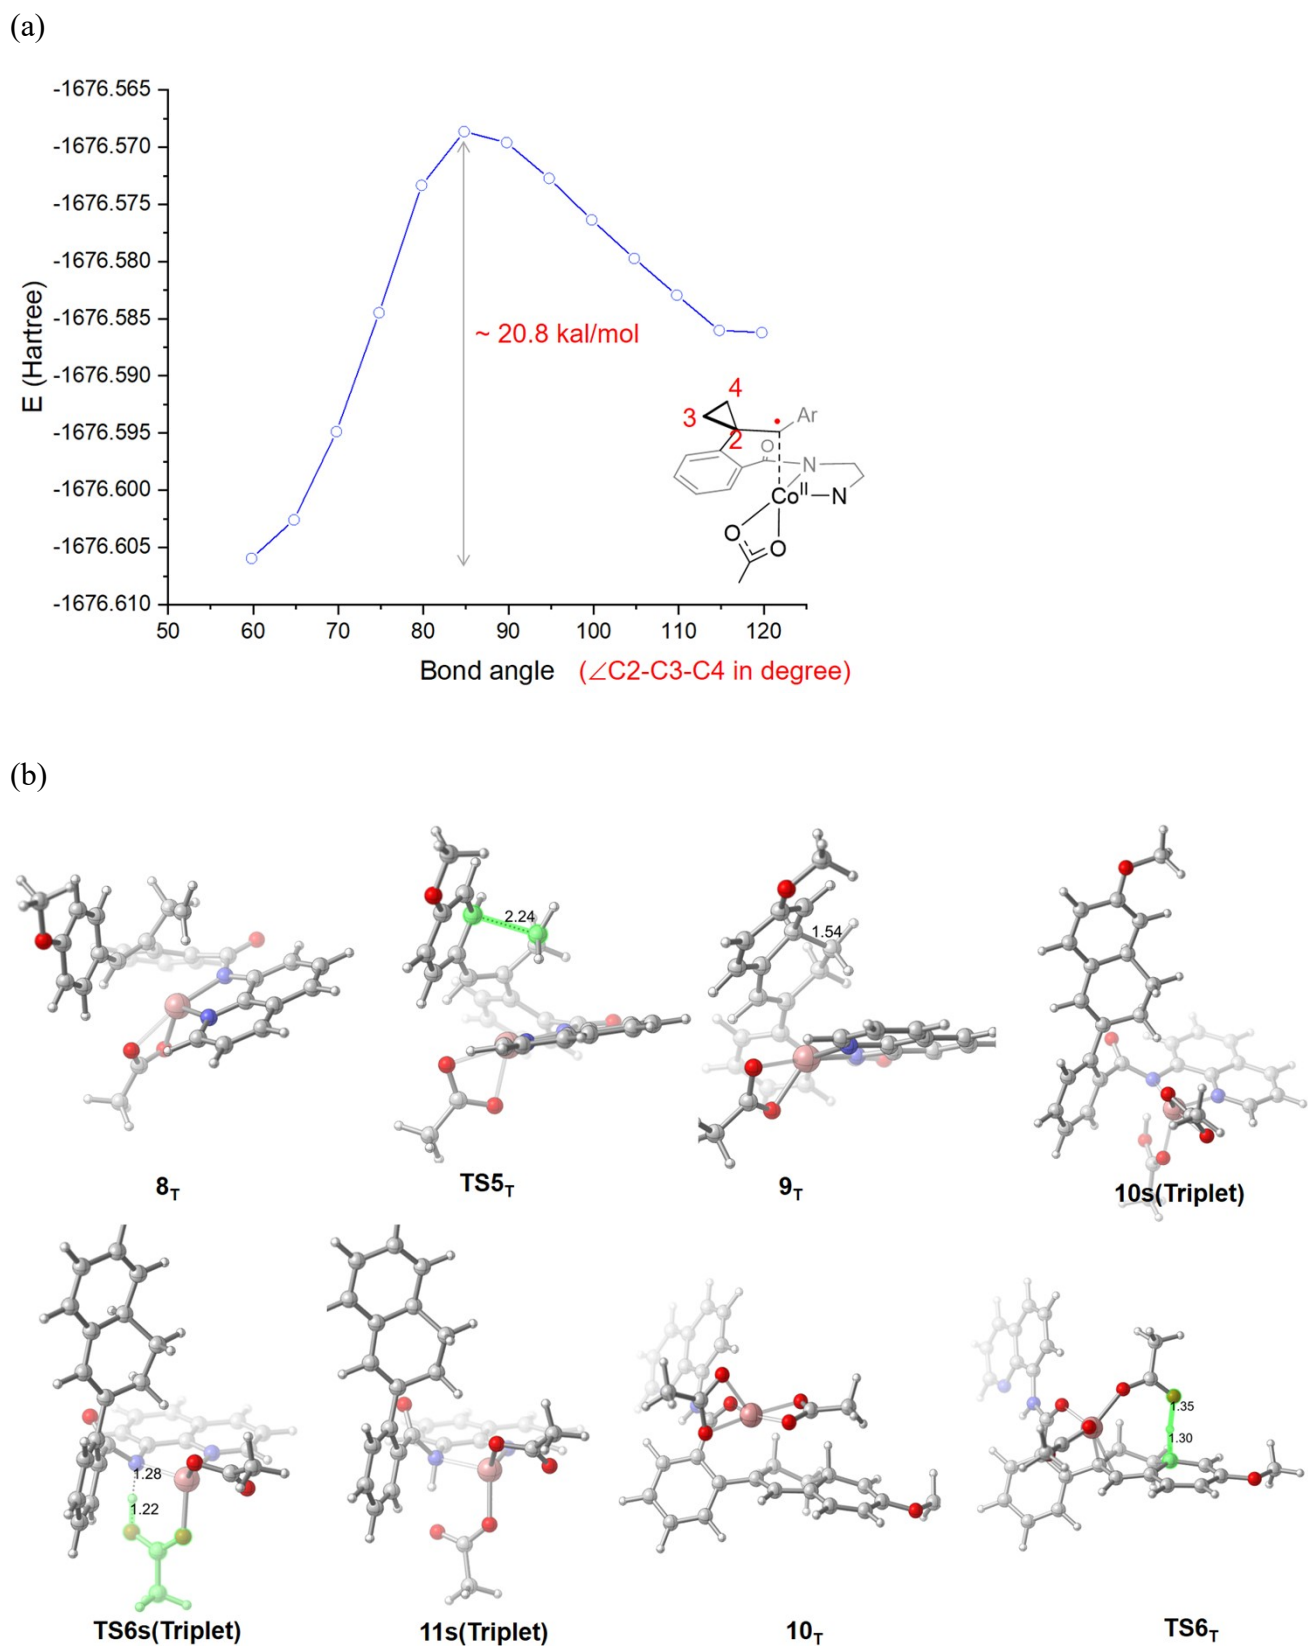

**Figure S21.** (a) The relaxed potential energy surface scan results at the B3LYP-D3(BJ)/6-31G\*/SDD(Co) level of theory for the direct carbon-carbon bond homolysis from  $5_T$ . (b) Optimized structures of the key transition states and intermediates with selected bond distances in Å.

We have also considered the direct occurrence of carbon-carbon bond homolysis in the three-membered ring from intermediate **5<sub>T</sub>**. However, we cannot locate the corresponding transition state, although the relaxed potential energy surface scans indicate there exists an energy maximum. The relaxed potential energy surface scan results with the bond angles as the scanning variable are given in Figure S21a.

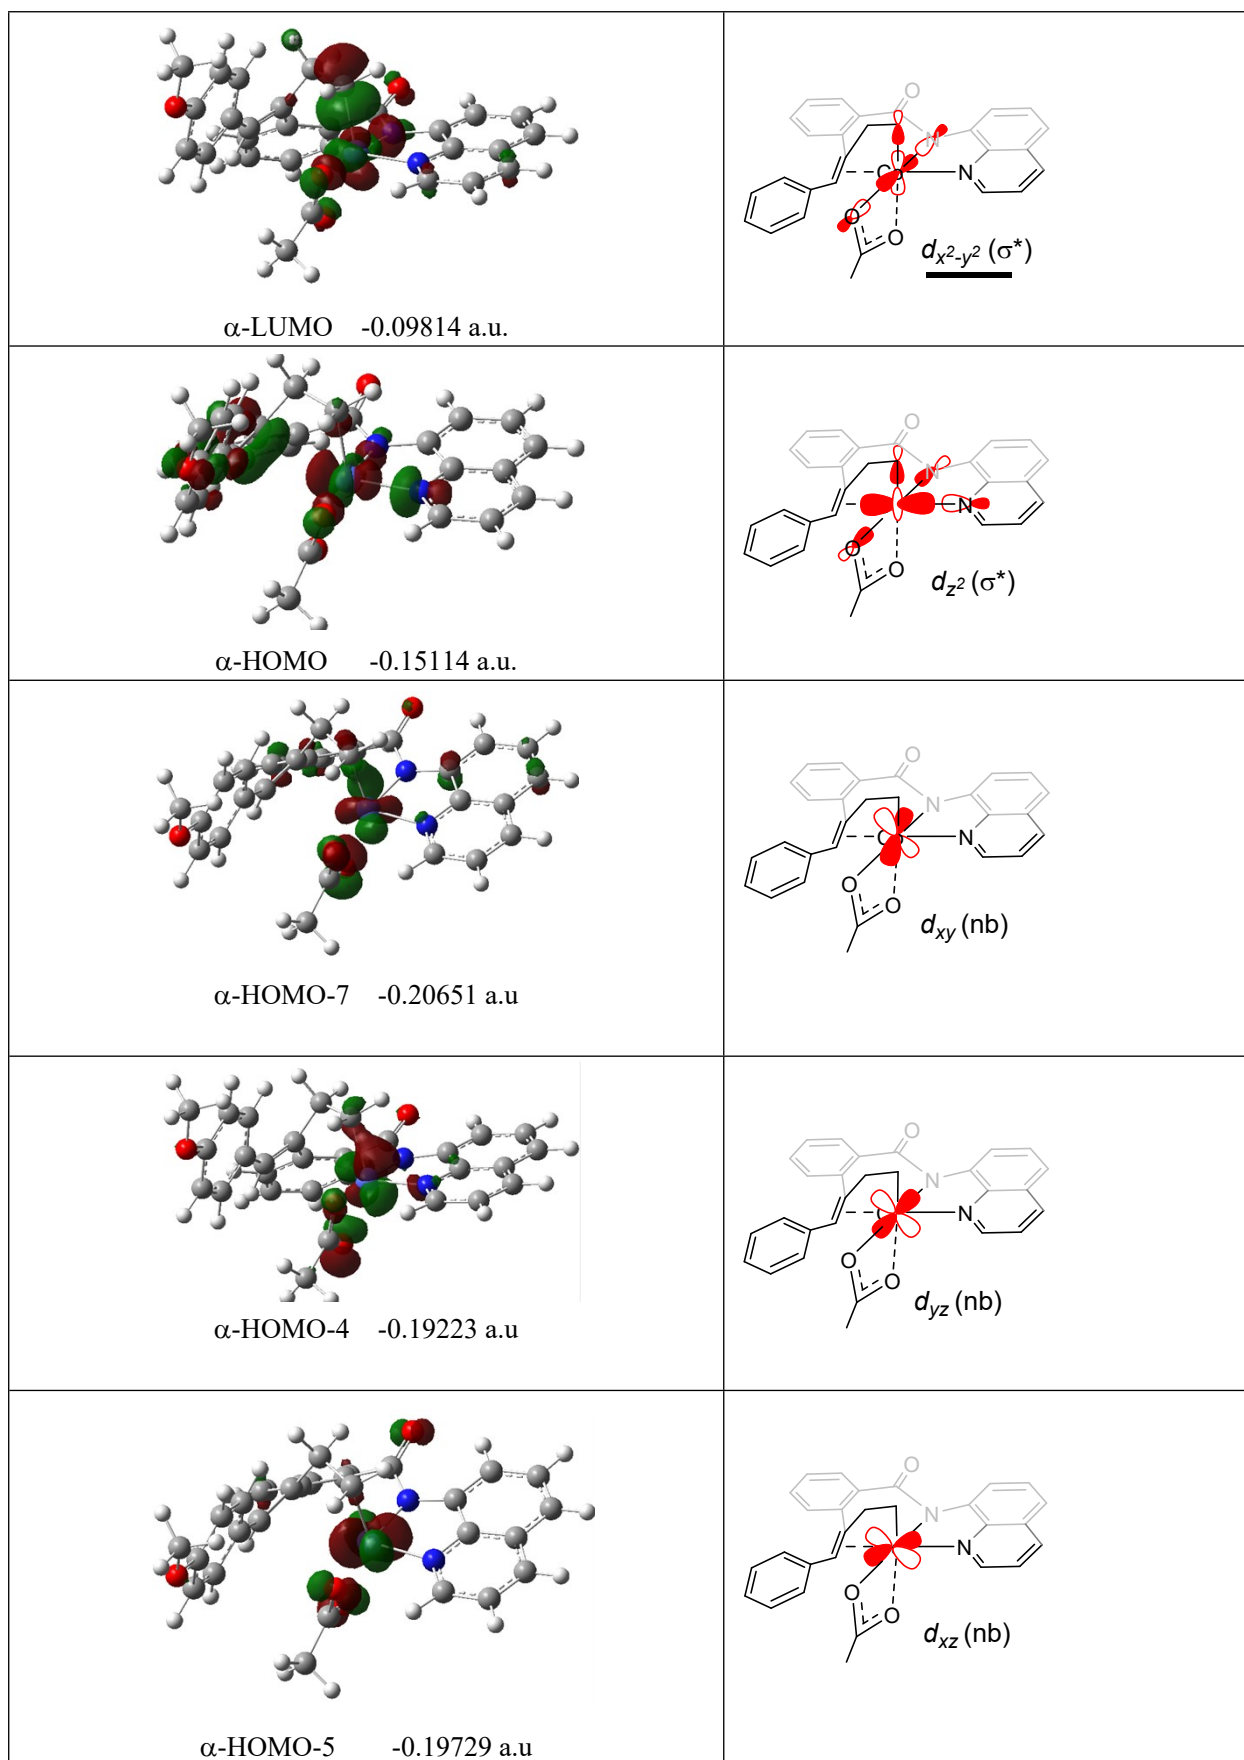

**Figure S22.** Molecular orbital iso-contour surfaces of  $6_T$  (isovalue = 0.05) calculated at the SMD(toluene)/BLYP-D3(BJ)/6-31G(d,p)/SDD(Co) level.

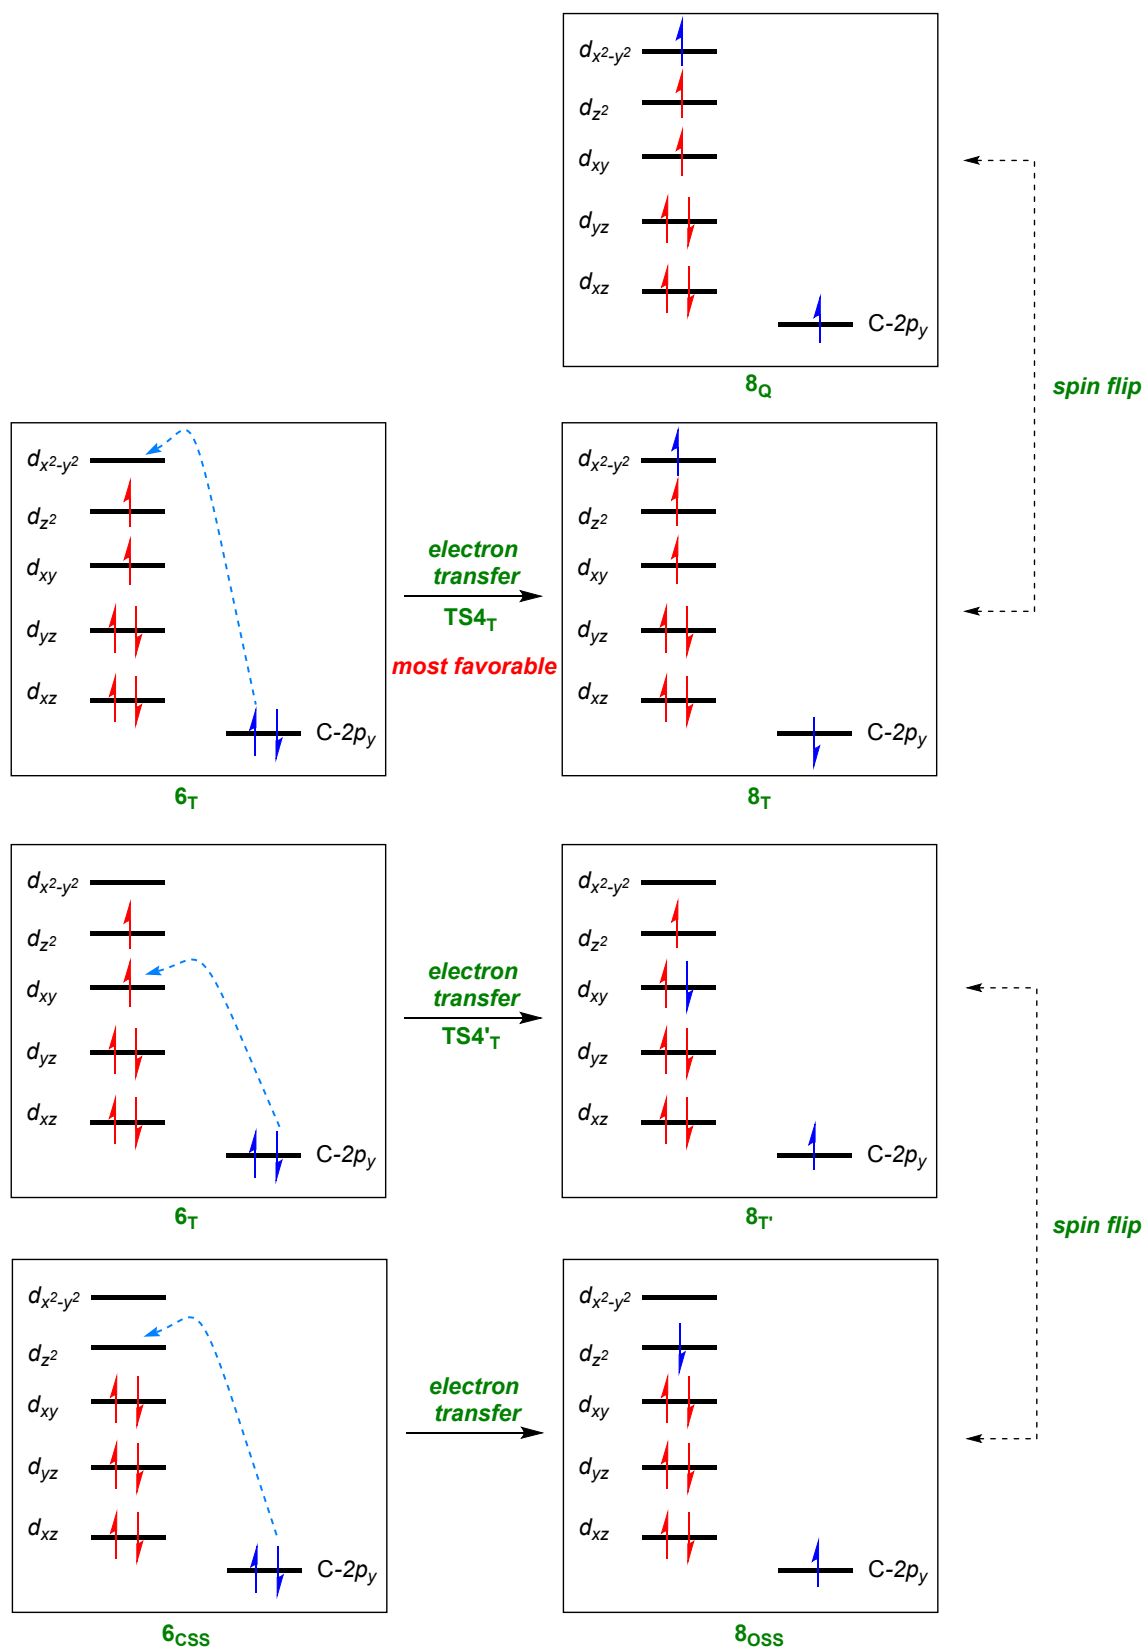

**Figure S23.** Schematic illustration of the electronic structure changes for the Co-C homolysis.



## 2.2.2 The potential roles of AgOAc

We first investigated the potential involvement of silver acetate during the migratory insertion. From complex **5s**, coordination of the AgOAc generates the stable intermediate **5s\_AgOAc**, which is exergonic by 9.4 kcal/mol for the triplet surface (Figure S24). The migratory insertion requires an energy barrier of 17.5 kcal/mol (**TS1\_AgOAc<sub>S</sub>** relative to **5s\_AgOAc<sub>T</sub>**), which is 1.7 kcal/mol lower than that from **5s** (19.2 kcal/mol, **TS1<sub>S</sub>** relative to **5s<sub>T</sub>** in Figure S15). The corresponding optimized structures and spin density contours are shown in Figure S25. The spin density changes are similar with the results without AgOAc. Attempts to locate the triplet and quintet for the intermediate **5\_AgOAc** were unsuccessful. Dissociation of one AgOAc from **5\_AgOAc** is endergonic by 3.2 kcal/mol.

It is noteworthy that attempts to locate the transition states of bimetallic activation modes for the subsequent C–H activation *via* CMD did not meet with success (Figure S26). Free energy profiles for the C(sp<sup>2</sup>)–H activation from Co(IV) intermediate are given in Figure S27.

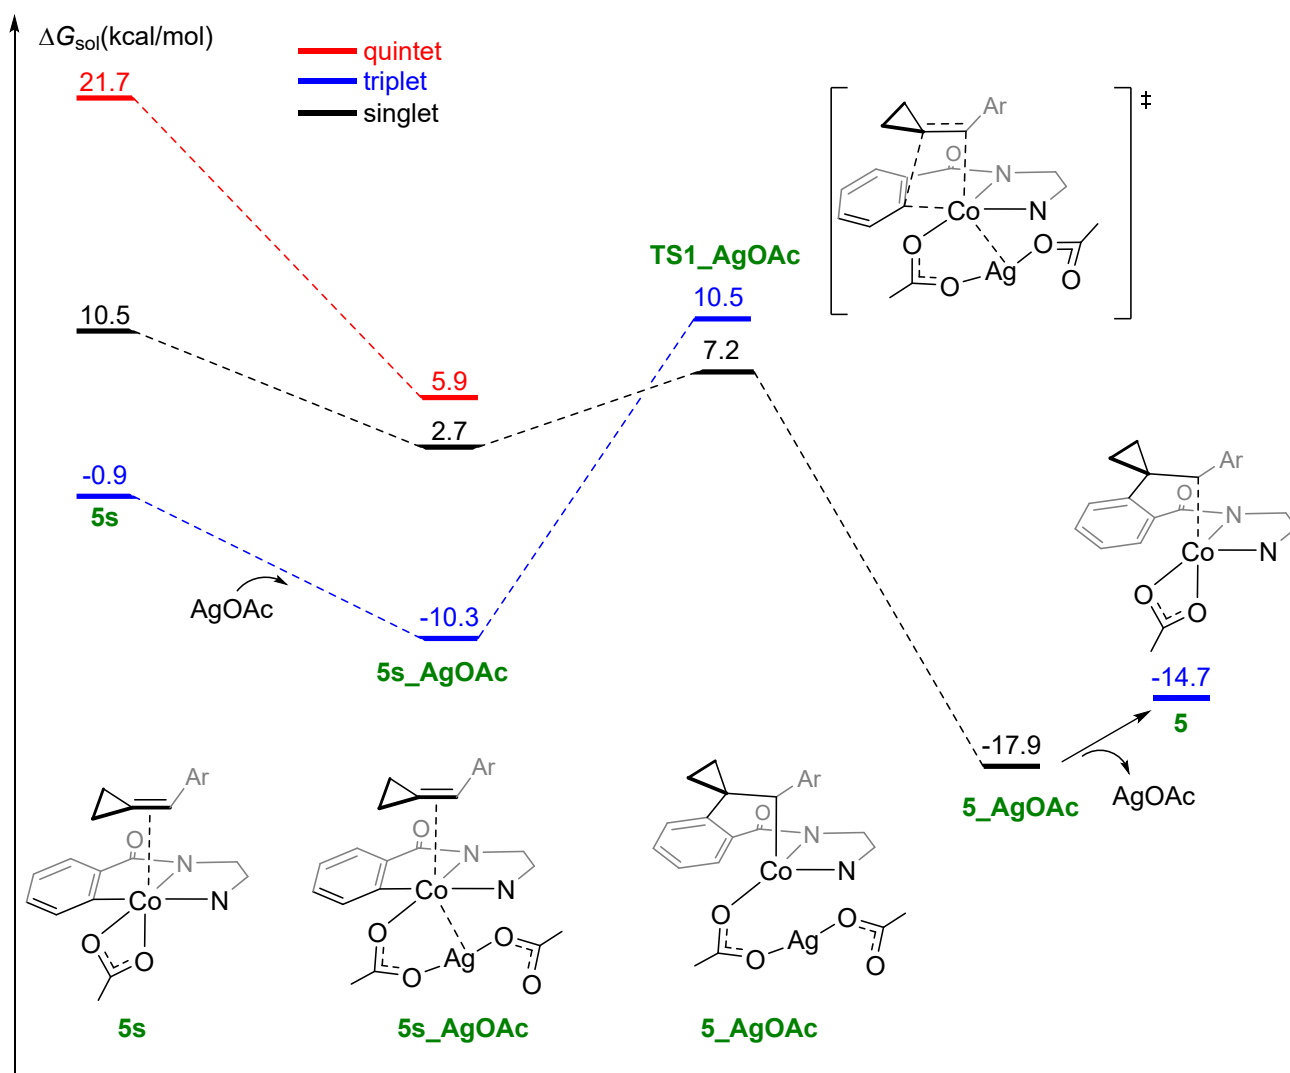

**Figure S24.** Free energy profiles for the migratory insertion from AgOAc-coordinated complex.

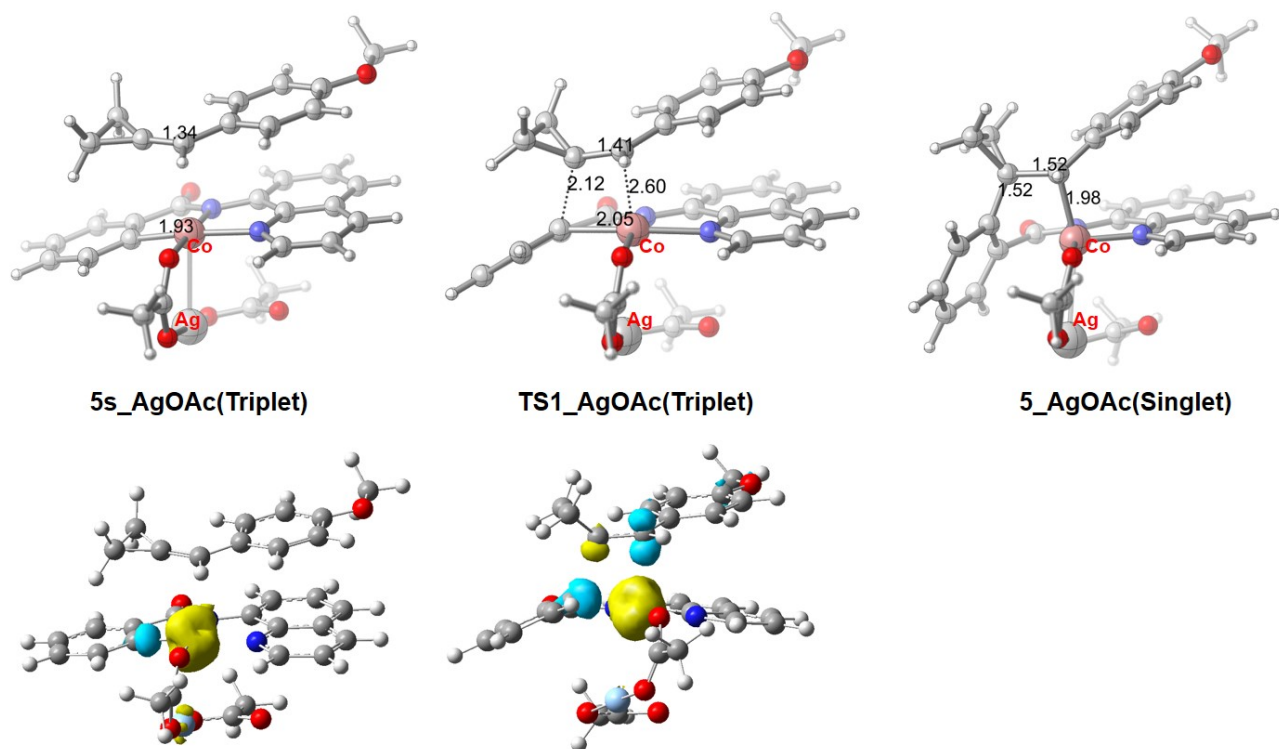

**Figure S25.** The corresponding optimized structures and spin density contours (isovalue=0.01; Yellow:  $\alpha$  spin density. Cyan:  $\beta$  spin density).

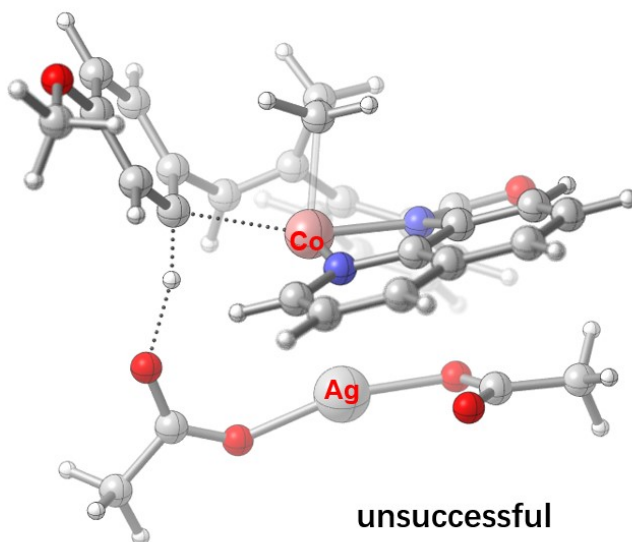

**Figure S26.** Attempts to locate the transition states of bimetallic activation modes for C-H activation did not meet with success

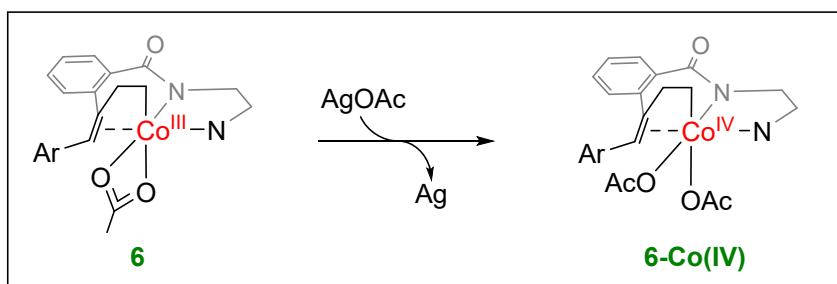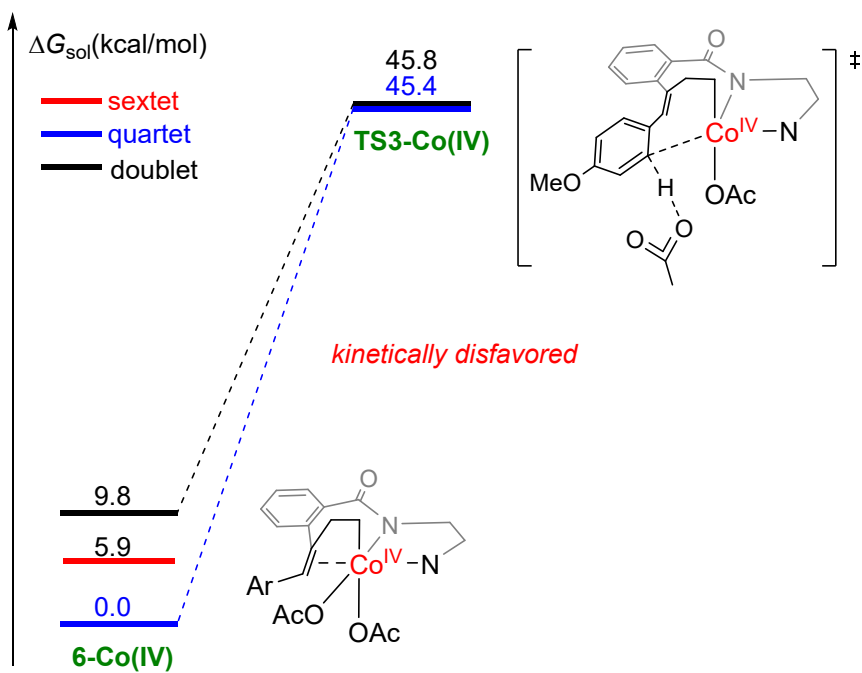

**Figure S27.** Free energy profiles for the  $\text{C}(\text{sp}^2)\text{-H}$  activation from  $\text{Co}(\text{IV})$  intermediate.

### 2.2.3 The competing pathway involving $\beta$ -H elimination

For the Rh(III)-catalyzed coupling of *N*-phenoxyacetamides and alkylidenecyclopropanes (ACPs), the reaction proceeds via sequential C–H activation, migratory insertion and  $\beta$ -C elimination to generate the Rh(III) homoallyl intermediate, from which  $\beta$ -H elimination may occur to produce the diene species (Scheme S3).<sup>[18]</sup> Herein, we also considered the  $\beta$ -H elimination from intermediate **6**. As shown in Figure S9, the  $\beta$ -H elimination from **6** is disfavored due to the relatively high energy barrier (34.8 kcal/mol for the triplet).

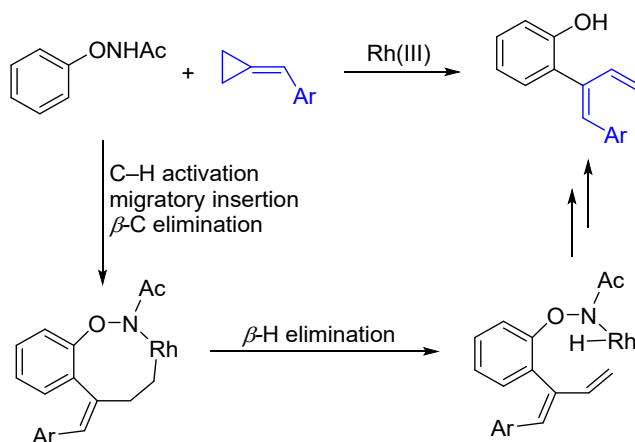

Scheme S3. Rh(III)-catalyzed ring scission via  $\beta$ -C/ $\beta$ -H elimination.

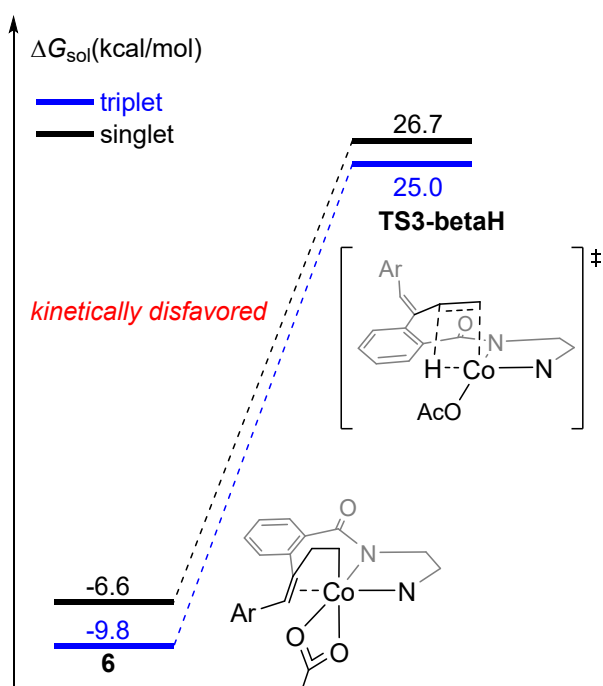

Figure S28. Free energy profiles for the  $\beta$ -H elimination from **6**.

### 2.3 The side reaction pathways in 1,2-insertion-*E*

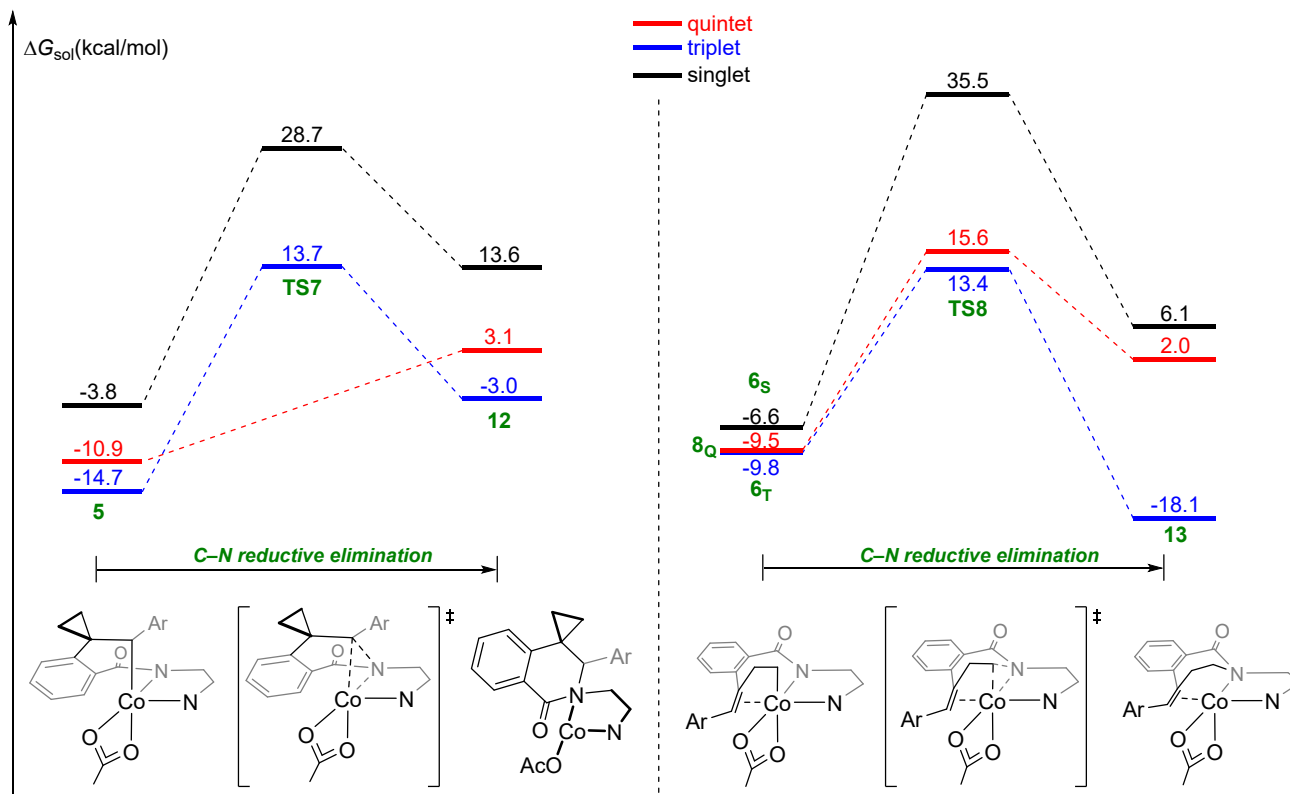

**Figure S29.** Free energy profiles for the C–N reductive elimination from intermediate **5** or **6**.

Compared to the results shown in Figure S20, the competing C–N reductive elimination from intermediate **5** or **6** in Figure S29 is kinetically unfavorable due to the relatively high energy barrier, in agreement with the experimental results that the corresponding products were not observed.

## 2.4 Results for the 1,2-insertion-Z

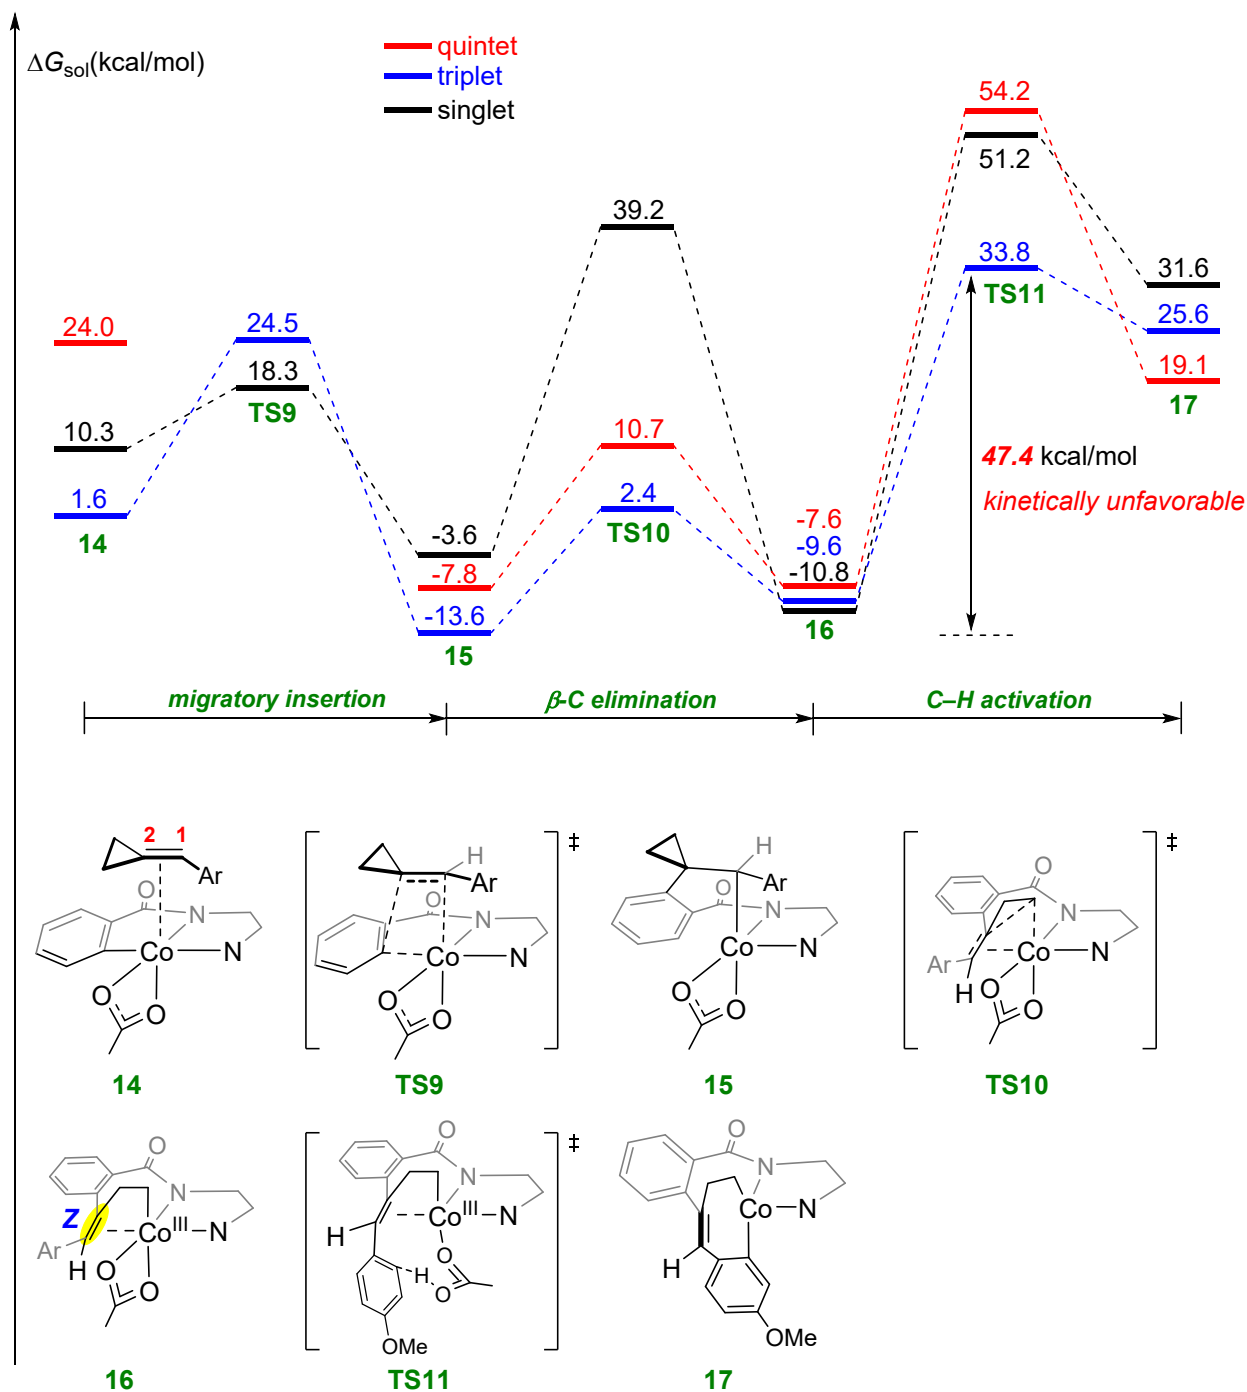

**Figure S30.** Free energy profiles for the 1,2-insertion-Z pathway.

In this case, the radical cyclization pathway is forbidden since the methylene connected with cobalt is *trans* to the aryl group. Therefore, we only considered the C-H activation via CMD in this 1,2-insertion-Z pathway. As shown in Figure S30, the second C-H activation via CMD in this pathway is kinetically unfavorable.

In 2019, Volla and coworkers reported the cobalt-catalyzed C–H activation and annulation of benzamides and alkylidenecyclopropanes under different reaction conditions (see Scheme S4).<sup>[19]</sup> The reductive elimination from the (cyclopropylmethyl)cobalt(III) occurs to afford the spiro-dihydroisoquinoline derivatives, in which the cyclopropyl ring was conserved. Herein, we also considered the possibility of reductive elimination from intermediate **15**. As shown in Figure S31, the energy barrier for the reductive elimination is 25.7 kcal/mol (**TS12<sub>T</sub>** relative to **15<sub>T</sub>**), which is 5.3 kcal/mol less favorable than the apparent activation energy of the PCET pathway (**TS6<sub>T</sub>** relative to **9<sub>T</sub>** in Figure S20). Taken together, the results in Figures S29 and S31 demonstrated that the reductive elimination from seven-membered cobaltacycle intermediate was kinetically unfavorable under the reaction conditions reported by Kwong and coworkers.

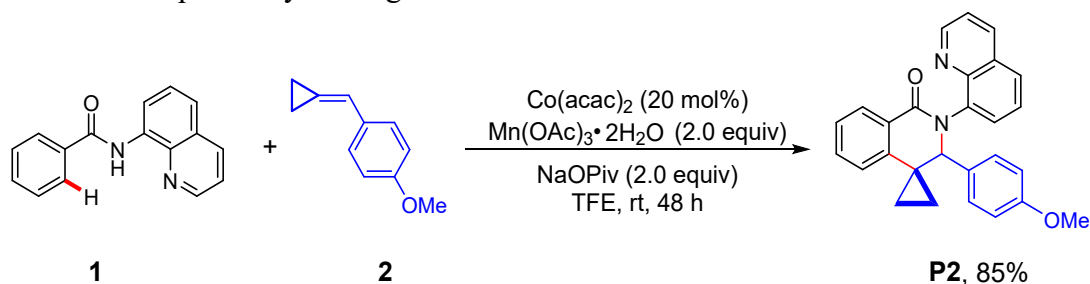

**Scheme S4.** Cobalt-catalyzed regioselective spirodihydroisoquinoline synthesis with conservation of the cyclopropyl ring.

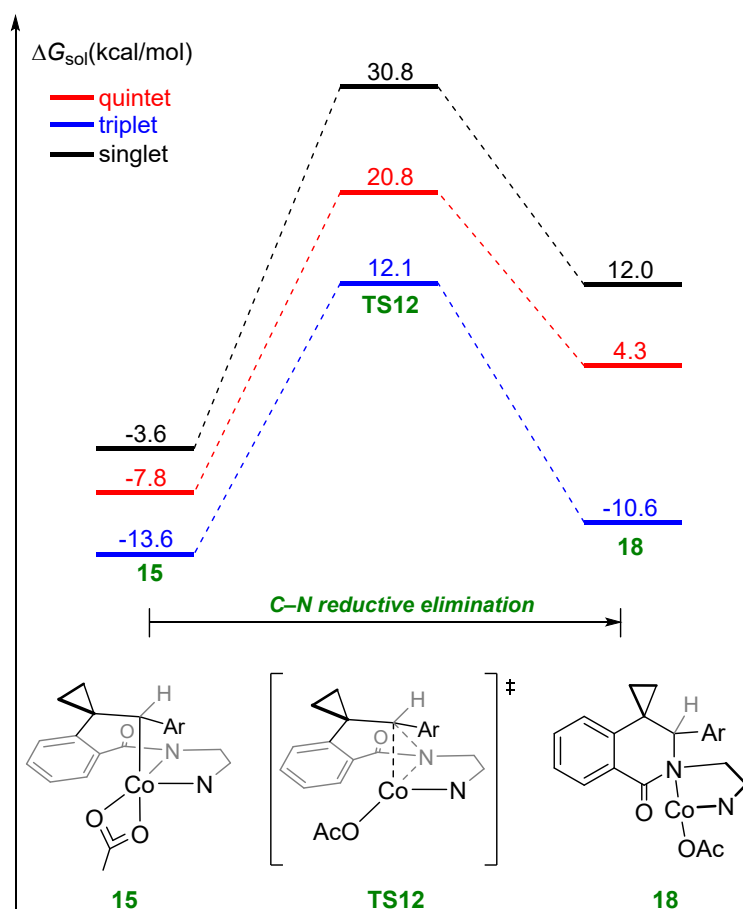

**Figure S31.** Free energy profiles for the C–N reductive elimination from intermediate **15**.

## 2.5. Results for the 2,1-insertion-*Re*

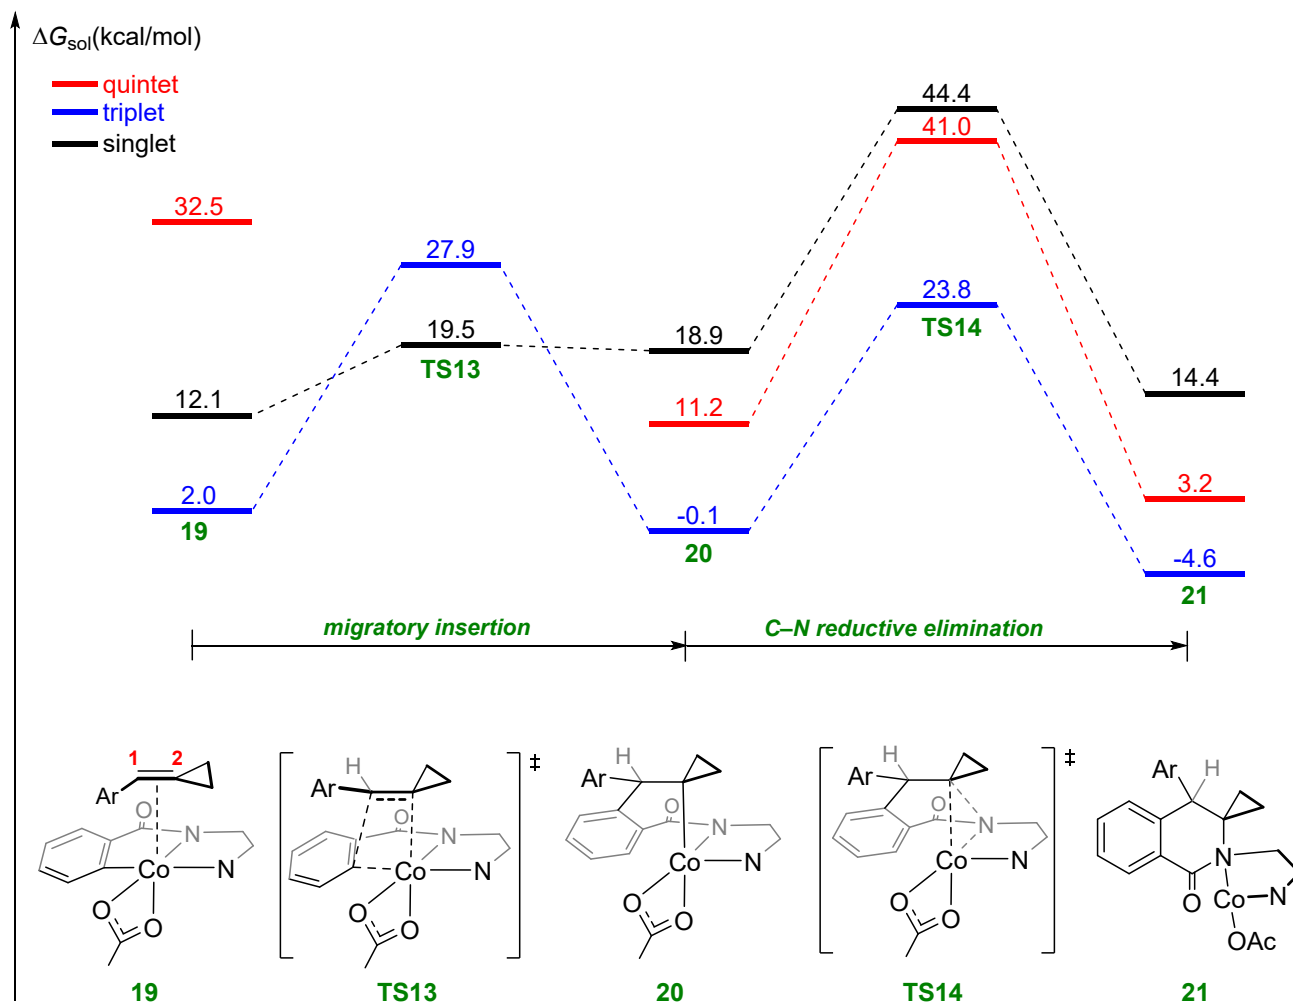

Figure S32. Free energy profiles for the 2,1-insertion-*Re* reaction pathway.





## References

- [1] M. J. Frisch, G. W. Trucks, H. B. Schlegel, G. E. Scuseria, M. A. Robb, J. R. Cheeseman, G. Scalmani, V. Barone, B. Mennucci, G. A. Petersson, H. Nakatsuji, M. Caricato, X. Li, H. P. Hratchian, A. F. Izmaylov, J. Bloino, G. Zheng, J. L. Sonnenberg, M. Hada, M. Ehara, K. Toyota, R. Fukuda, J. Hasegawa, M. Ishida, T. Nakajima, Y. Honda, O. Kitao, H. Nakai, T. Vreven, J. J. A. Montgomery, J. E. Peralta, F. Ogliaro, M. Bearpark, J. J. Heyd, E. Brothers, K. N. Kudin, V. N. Staroverov, R. Kobayashi, J. Normand, K. Raghavachari, A. Rendell, J. C. Burant, S. S. Iyengar, J. Tomasi, M. Cossi, N. Rega, J. M. Millam, M. Klene, J. E. Knox, J. B. Cross, V. Bakken, C. Adamo, J. Jaramillo, R. Gomperts, R. E. Stratmann, O. Yazyev, A. J. Austin, R. Cammi, C. Pomelli, J. W. Ochterski, R. L. Martin, K. Morokuma, V. G. Zakrzewski, G. A. Voth, P. Salvador, J. J. Dannenberg, S. Dapprich, A. D. Daniels, Farkas, J. B. Foresman, J. V. Ortiz, J. Cioslowski, D. J. Fox, Gaussian 09, Revision D.01, Gaussian, Inc., Wallingford CT, 2009
- [2] a) W. Yang, R. G. Parr, C. Lee, *Phys. Rev. B* **1988**, *37*, 785-789; b) A. D. Becke, *J. Chem. Phys.* **1993**, *98*, 5648-5652
- [3] S. Grimme, J. Antony, S. Ehrlich, H. Krieg, *J. Chem. Phys.* **2010**, *132*, 154104
- [4] a) F. Weigend, R. Ahlrichs, *Phys. Chem. Chem. Phys.* **2005**, *7*, 3297-3305; b) F. Weigend, *Phys. Chem. Chem. Phys.* **2006**, *8*, 1057-1065
- [5] A. V. Marenich, C. J. Cramer, D. G. Truhlar, *J. Phys. Chem. B* **2009**, *113*, 6378-6396
- [6] C. Y. Legault, CYLview, 1.0b, Université de Sherbrooke, Canada, 2009 (<http://www.cylview.org>).
- [7] T. Lu, F. Chen, *J. Comput. Chem.* **2012**, *33*, 580-592
- [8] a) P. V. R. Schleyer, C. Maerker, A. Dransfeld, H. Jiao, N. J. R. van Eikema Hommes, *J. Am. Chem. Soc.* **1996**, *118*, 6317-6318.; b) Z. Chen, C. S. Wannere, C. Corminboeuf, R. Puchta, P. V. R. Schleyer, *Chem. Rev.* **2005**, *105*, 3842-3888.
- [9] a) J. M. Wittbrodt, H. B. Schlegel, *J. Chem. Phys.* **1996**, *105*, 6574; b) A. S. Menon, L. Radom, *J. Phys. Chem. A* **2008**, *112*, 13225-13230.
- [10] J. A. Pople, P. M. Gill, N. C. Handy, *Int. J. Quantum Chem.* **1995**, *56*, 303-305.
- [11] a) M. Ernzerhof, G. E. Scuseria, *J. Chem. Phys.* **1999**, *110*, 5029; b) C. Adamo, V. Barone, *J. Chem. Phys.* **1999**, *110*, 6158.
- [12] a) Y. Zhao, D. G. Truhlar, *J. Chem. Phys.* **2006**, *125*, 194101; b) Y. Zhao, D. G. Truhlar, *Theor. Chem. Acc.* **2008**, *120*, 215-241
- [13] J. Chai, M. Head-Gordon, *Phys. Chem. Chem. Phys.* **2008**, *10*, 6615-6620
- [14] a) L. M. Lawson Daku, F. Aquilante, T. W. Robinson, A. Hauser, *J. Chem. Theory Comput.* **2012**, *8*, 4216-4231; b) J. Cirera, M. Via-Nadal, E. Ruiz, *Inorg. Chem.* **2018**, *57*, 14097-14105; c) M. Radoń, *Phys. Chem. Chem. Phys.* **2019**, *21*, 4854-4870; d) S. E. Neale, D. A. Pantazis, S. A. Macgregor, *Dalton T.* **2020**, *49*, 6478-6487
- [15] a) S. Maity, R. Kancherla, U. Dhawa, E. Hoque, S. Pimparkar, D. Maiti, *ACS Catal.* **2016**, *6*, 5493-5499. b) L. Xu, E. E. L. N. Liu, J. Bacsá, C. E. MacBeth, D. G. Musaev, *Chem. Sci.* **2020**, *11*, 6085-6096.
- [16] a) J. N. Harvey, M. Aschi, H. Schwarz, W. Koch, *Theor. Chem. Acc.* **1998**, *99*, 95-99; b) T. Lu, The sobMECP Program. Website: <http://sobereva.com/286>.
- [17] a) R. M. O'Ferrall, *J. Chem. Soc. B* **1970**, *0*, 274-277. (b) W. P. Jencks, *Chem. Rev.* **1972**, *72*, 705-718.
- [18] a) H. Zhang, S. Lin, H. Gao, K. Zhang, Y. Wang, Z. Zhou, W. Yi, *Commun. Chem.* **2021**, *4*, 81; b) G. Xu, Q. Chen, F. Wu, D. Bai, J. Chang, X. Li, *Org. Lett.* **2021**, *23*, 2927-2932
- [19] A. Dey, N. Thrimurtulu, C. M. R. Volla, *Org. Lett.* **2019**, *21*, 3871-3875.

### 3. Calculated energies and imaginary frequencies.

**Table S2.** Calculated energies and imaginary frequencies in Section 1.

| Stationary point          | Corrected thermal correction to Gibbs free energy at B3LYP-D3(BJ)/6-31G(d,p)/ECP10MDF(Co) (in a.u.) | Single-point energy including solvation energy at B3LYP-D3(BJ)/def2-TZVP (in a.u.) | Imaginary frequencies (in cm <sup>-1</sup> ) | $\langle \hat{S}^2 \rangle$ |
|---------------------------|-----------------------------------------------------------------------------------------------------|------------------------------------------------------------------------------------|----------------------------------------------|-----------------------------|
| <b>ethylene (R=H)</b>     |                                                                                                     |                                                                                    |                                              |                             |
| INT1 <sub>S</sub>         | 0.277841                                                                                            | -2490.999442                                                                       |                                              |                             |
| INT1 <sub>T</sub>         | 0.271616                                                                                            | -2491.000544                                                                       |                                              | 2.0924                      |
| INT1 <sub>Q</sub>         | 0.266355                                                                                            | -2490.958187                                                                       |                                              | 6.0345                      |
| TS <sub>S</sub>           | 0.280376                                                                                            | -2490.989751                                                                       | 313.69 <i>i</i>                              |                             |
| TS <sub>T</sub>           | 0.272796                                                                                            | -2490.970172                                                                       | 410.57 <i>i</i>                              | 2.2405                      |
| INT2 <sub>S</sub>         | 0.279856                                                                                            | -2491.020077                                                                       |                                              |                             |
| INT2 <sub>T</sub>         | 0.273675                                                                                            | -2491.022598                                                                       |                                              | 2.4502                      |
| INT2 <sub>Q</sub>         | 0.271122                                                                                            | -2491.008447                                                                       |                                              | 6.0099                      |
| <b>R=CO<sub>2</sub>Et</b> |                                                                                                     |                                                                                    |                                              |                             |
| INT1 <sub>S</sub>         | 0.343233                                                                                            | -2758.327085                                                                       |                                              |                             |
| INT1 <sub>T</sub>         | 0.337987                                                                                            | -2758.338526                                                                       |                                              | 2.0915                      |
| INT1 <sub>Q</sub>         | 0.333268                                                                                            | -2758.296357                                                                       |                                              | 6.0318                      |
| TS <sub>S</sub>           | 0.345013                                                                                            | -2758.322401                                                                       | 244.66 <i>i</i>                              |                             |
| TS <sub>T</sub>           | 0.336601                                                                                            | -2758.302815                                                                       | 437.63 <i>i</i>                              |                             |
| INT2 <sub>S</sub>         | 0.34557                                                                                             | -2758.355663                                                                       |                                              |                             |
| INT2 <sub>T</sub>         | 0.340059                                                                                            | -2758.357302                                                                       |                                              | 2.4694                      |
| INT2 <sub>Q</sub>         | 0.338117                                                                                            | -2758.355691                                                                       |                                              | 6.0126                      |
| <b>R=OEt</b>              |                                                                                                     |                                                                                    |                                              |                             |
| INT1 <sub>S</sub>         | 0.337296                                                                                            | -2644.923574                                                                       |                                              |                             |
| INT1 <sub>T</sub>         | 0.328126                                                                                            | -2644.922319                                                                       |                                              | 2.0903                      |
| INT1 <sub>Q</sub>         | 0.325122                                                                                            | -2644.880479                                                                       |                                              | 6.0332                      |

|                                     |          |              |                 |        |
|-------------------------------------|----------|--------------|-----------------|--------|
| TS <sub>S</sub>                     | 0.336001 | -2644.904269 | 315.70 <i>i</i> |        |
| TS <sub>T</sub>                     | 0.332042 | -2644.887505 | 236.33 <i>i</i> | 2.4862 |
| INT2 <sub>S</sub>                   | 0.338086 | -2644.938162 |                 |        |
| INT2 <sub>T</sub>                   | 0.330332 | -2644.948058 |                 | 2.5218 |
| INT2 <sub>Q</sub>                   | 0.329657 | -2644.935317 |                 | 6.0091 |
| <b>R=Ph</b>                         |          |              |                 |        |
| INT1 <sub>S</sub>                   | 0.355486 | -2722.178849 |                 |        |
| INT1 <sub>T</sub>                   | 0.349037 | -2722.185477 |                 | 2.0928 |
| INT1 <sub>Q</sub>                   | 0.346269 | -2722.141503 |                 | 6.0354 |
| TS <sub>S</sub>                     | 0.356866 | -2722.166422 | 310.61 <i>i</i> |        |
| TS <sub>T</sub>                     | 0.350225 | -2722.148883 | 424.30 <i>i</i> | 2.6136 |
| INT2 <sub>S</sub>                   | 0.35837  | -2722.19750  |                 |        |
| INT2 <sub>T</sub>                   | 0.350253 | -2722.208492 |                 | 2.8148 |
| INT2 <sub>Q</sub>                   | 0.346322 | -2722.208213 |                 | 6.0366 |
| <b>R=C<sub>4</sub>H<sub>9</sub></b> |          |              |                 |        |
| INT1 <sub>S</sub>                   | 0.384293 | -2648.341644 |                 |        |
| INT1 <sub>T</sub>                   | 0.376651 | -2648.34551  |                 | 2.0952 |
| INT1 <sub>Q</sub>                   | 0.371653 | -2648.302502 |                 | 6.0345 |
| TS <sub>S</sub>                     | 0.386224 | -2648.32919  | 305.87 <i>i</i> |        |
| TS <sub>T</sub>                     | 0.381772 | -2648.302438 | 346.85 <i>i</i> | 2.1565 |
| INT2 <sub>S</sub>                   | 0.386595 | -2648.359081 |                 |        |
| INT2 <sub>T</sub>                   | 0.379941 | -2648.366826 |                 | 2.4792 |
| INT2 <sub>Q</sub>                   | 0.377326 | -2648.352514 |                 | 6.0100 |
| <b>R=CH<sub>2</sub>OH</b>           |          |              |                 |        |
| INT1 <sub>S</sub>                   | 0.307294 | -2605.588209 |                 |        |
| INT1 <sub>T</sub>                   | 0.299099 | -2605.595546 |                 | 2.0945 |
| INT1 <sub>Q</sub>                   | 0.296947 | -2605.55108  |                 | 6.0347 |
| TS <sub>S</sub>                     | 0.310445 | -2605.579272 | 287.04 <i>i</i> |        |
| TS <sub>T</sub>                     | 0.302659 | -2605.559804 | 382.82 <i>i</i> | 2.2434 |

|                     |          |              |                  |        |
|---------------------|----------|--------------|------------------|--------|
| INT2 <sub>S</sub>   | 0.311716 | -2605.611337 |                  |        |
| INT2 <sub>T</sub>   | 0.304178 | -2605.614964 |                  | 2.4067 |
| INT2 <sub>Q</sub>   | 0.300970 | -2605.602678 |                  | 6.0103 |
| <b>cyclopentene</b> |          |              |                  |        |
| INT1 <sub>S</sub>   | 0.339908 | -2607.797996 |                  |        |
| INT1 <sub>T</sub>   | 0.334095 | -2607.800988 |                  | 2.0887 |
| INT1 <sub>Q</sub>   | 0.328663 | -2607.758248 |                  | 6.0339 |
| TS <sub>S</sub>     | 0.342364 | -2607.783643 | 320.87 <i>i</i>  |        |
| TS <sub>T</sub>     | 0.335548 | -2607.76895  | 273.82 <i>i</i>  | 2.2180 |
| INT2 <sub>S</sub>   | 0.345049 | -2607.81136  |                  |        |
| INT2 <sub>T</sub>   | 0.337967 | -2607.814234 |                  | 2.4134 |
| INT2 <sub>Q</sub>   | 0.331227 | -2607.802795 |                  | 6.0107 |
| <b>allene</b>       |          |              |                  |        |
| INT1 <sub>S</sub>   | 0.358217 | -2760.257285 |                  |        |
| INT1 <sub>T</sub>   | 0.350739 | -2760.272161 |                  | 2.0921 |
| INT1 <sub>Q</sub>   | 0.345301 | -2760.229053 |                  | 6.0321 |
| TS <sub>S</sub>     | 0.358221 | -2760.249624 | 228.75 <i>i</i>  |        |
| TS <sub>T</sub>     | 0.352026 | -2760.240465 | 246.33 <i>i</i>  | 2.4847 |
| INT2 <sub>S</sub>   | 0.360201 | -2760.297492 |                  |        |
| INT2 <sub>T</sub>   | 0.351456 | -2760.315243 |                  | 2.9722 |
| INT2 <sub>Q</sub>   | 0.351881 | -2760.315095 |                  | 6.0428 |
|                     |          |              |                  |        |
| A <sub>S</sub>      | 0.338957 | -2870.814344 |                  |        |
| A <sub>T</sub>      | 0.335299 | -2870.803437 |                  | 2.0583 |
| A <sub>Q</sub>      | 0.331688 | -2870.794197 |                  | 6.0096 |
| TSA <sub>S</sub>    | 0.335542 | -2870.807934 | 869.06 <i>i</i>  |        |
| TSA <sub>T</sub>    | 0.333069 | -2870.790320 | 1157.92 <i>i</i> | 2.0944 |
| TSA <sub>Q</sub>    | 0.328460 | -2870.782909 | 898.38 <i>i</i>  | 6.0098 |
| B <sub>S</sub>      | 0.283173 | -2641.589102 |                  |        |

|                            |                   |                     |                  |        |
|----------------------------|-------------------|---------------------|------------------|--------|
| <b>B<sub>T</sub></b>       | 0.27689           | -2641.583839        |                  | 2.0383 |
| <b>B<sub>Q</sub></b>       | 0.272289          | -2641.590722        |                  | 6.0366 |
| <b>TSB<sub>S</sub></b>     | 0.278689          | -2641.560074        | 1107.44 <i>i</i> |        |
| <b>TSB<sub>T</sub></b>     | 0.272451          | -2641.552227        | 899.72 <i>i</i>  | 2.0704 |
| <b>TSB<sub>Q</sub></b>     | 0.267889          | -2641.533858        | 733.66 <i>i</i>  | 6.0315 |
| <b>C<sub>S</sub></b>       | 0.284283          | -2641.581301        |                  |        |
| <b>C<sub>T</sub></b>       | 0.275173          | -2641.580827        |                  | 2.0898 |
| <b>C<sub>Q</sub></b>       | 0.273259          | -2641.541328        |                  | 6.0326 |
| <b>D<sub>S</sub></b>       | 0.514031          | -3443.678054        |                  |        |
| <b>D<sub>T</sub></b>       | 0.508829          | -3443.681966        |                  | 2.0499 |
| <b>D<sub>Q</sub></b>       | 0.501683          | -3443.692113        |                  | 6.0355 |
| <b>TSC<sub>S</sub></b>     | 0.509838          | -3443.667841        | 1154.68 <i>i</i> |        |
| <b>E<sub>S</sub></b>       | 0.456651          | -3214.465621        |                  |        |
| <b>E<sub>T</sub></b>       | 0.452002          | -3214.462983        |                  | 2.0515 |
| <b>E<sub>Q</sub></b>       | 0.445935          | -3214.461936        |                  | 6.0352 |
| <b>TSD<sub>S</sub></b>     | 0.453071          | -3214.448822        | 1170.75 <i>i</i> |        |
| <b>F<sub>S</sub></b>       | 0.457289          | -3214.471213        |                  |        |
| <b>F<sub>T</sub></b>       | 0.451386          | -3214.453954        |                  | 2.0996 |
| <b>F<sub>Q</sub></b>       | 0.447804          | -3214.412987        |                  | 6.0158 |
| <b>INT1_AQ<sub>S</sub></b> | 0.450921          | -3063.878191        |                  |        |
| <b>INT1_AQ<sub>T</sub></b> | 0.440915          | -3063.882628        |                  | 2.0759 |
| <b>INT1_AQ<sub>Q</sub></b> | 0.435487          | -3063.835609        |                  | 6.0141 |
| <b>TS_AQ<sub>S</sub></b>   | 0.452592          | -3063.863183        | 359.73 <i>i</i>  |        |
| <b>TS_AQ<sub>T</sub></b>   | 0.445511          | -3063.836481        | 381.92 <i>i</i>  | 2.2408 |
| <b>INT2_AQ<sub>S</sub></b> | 0.453037          | -3063.891046        |                  |        |
| <b>INT2_AQ<sub>T</sub></b> | 0.448159          | -3063.896653        |                  | 2.3108 |
| <b>INT2_AQ<sub>Q</sub></b> | 0.443034          | -3063.888780        |                  | 6.0124 |
|                            |                   |                     |                  |        |
| Stationary                 | Corrected thermal | Single-point energy | Imaginary        |        |

| point                 | correction to Gibbs free energy at B3LYP-D3(BJ)/6-31G(d,p)/ECP10MDF(Co) (in a.u.)                  | including solvation energy at B3LYP-D3(BJ)/def2-TZVPP (in a.u.)                    | frequencies (in cm <sup>-1</sup> )           |        |
|-----------------------|----------------------------------------------------------------------------------------------------|------------------------------------------------------------------------------------|----------------------------------------------|--------|
| <b>ethylene (R=H)</b> |                                                                                                    |                                                                                    |                                              |        |
| INT1 <sub>S</sub>     | 0.277841                                                                                           | -2491.008953                                                                       |                                              |        |
| INT1 <sub>T</sub>     | 0.271616                                                                                           | -2491.010029                                                                       |                                              | 2.0924 |
| INT1 <sub>Q</sub>     | 0.266355                                                                                           | -2490.967490                                                                       |                                              | 6.0345 |
| TS <sub>S</sub>       | 0.280376                                                                                           | -2490.999242                                                                       | 313.69 <i>i</i>                              |        |
| TS <sub>T</sub>       | 0.272796                                                                                           | -2490.979962                                                                       | 410.57 <i>i</i>                              | 2.2405 |
| INT2 <sub>S</sub>     | 0.279856                                                                                           | -2491.029353                                                                       |                                              |        |
| INT2 <sub>T</sub>     | 0.273675                                                                                           | -2491.032303                                                                       |                                              | 2.4502 |
| INT2 <sub>Q</sub>     | 0.271122                                                                                           | -2491.018175                                                                       |                                              | 6.0099 |
|                       |                                                                                                    |                                                                                    |                                              |        |
| Stationary point      | Corrected thermal correction to Gibbs free energy at PBE0-D3(BJ)/6-31G(d,p)/ECP10MDF(Co) (in a.u.) | Single-point energy including solvation energy at PBE0-D3(BJ)/def2-TZVPP (in a.u.) | Imaginary frequencies (in cm <sup>-1</sup> ) |        |
| <b>ethylene (R=H)</b> |                                                                                                    |                                                                                    |                                              |        |
| INT1 <sub>S</sub>     | 0.282696                                                                                           | -2489.396967                                                                       |                                              |        |
| INT1 <sub>T</sub>     | 0.275072                                                                                           | -2489.396369                                                                       |                                              | 2.1375 |
| INT1 <sub>Q</sub>     | 0.270028                                                                                           | -2489.355616                                                                       |                                              | 6.0477 |
| TS <sub>S</sub>       | 0.283743                                                                                           | -2489.391057                                                                       | 282.44 <i>i</i>                              |        |
| TS <sub>T</sub>       | 0.275674                                                                                           | -2489.374840                                                                       | 390.79 <i>i</i>                              | 2.3196 |
| INT2 <sub>S</sub>     | 0.282979                                                                                           | -2489.418813                                                                       |                                              |        |
| INT2 <sub>T</sub>     | 0.276708                                                                                           | -2489.430133                                                                       |                                              | 2.5439 |
| INT2 <sub>Q</sub>     | 0.274996                                                                                           | -2489.417280                                                                       |                                              | 6.0102 |
|                       |                                                                                                    |                                                                                    |                                              |        |
| Stationary point      | Corrected thermal correction to Gibbs free                                                         | Single-point energy including solvation energy                                     | Imaginary frequencies                        |        |

|                           | energy at M06/6-31G(d,p)/ECP10MDF(Co)<br>(in a.u.)                                                         | at M06/def2-TZVPP (in<br>a.u.)                                                         | (in cm <sup>-1</sup> )                             |        |
|---------------------------|------------------------------------------------------------------------------------------------------------|----------------------------------------------------------------------------------------|----------------------------------------------------|--------|
| <b>ethylene<br/>(R=H)</b> |                                                                                                            |                                                                                        |                                                    |        |
| INT1 <sub>S</sub>         | 0.278618                                                                                                   | -2490.030094                                                                           |                                                    |        |
| INT1 <sub>T</sub>         | 0.27114                                                                                                    | -2490.029609                                                                           |                                                    | 2.0844 |
| INT1 <sub>Q</sub>         | 0.268347                                                                                                   | -2489.990728                                                                           |                                                    | 6.0345 |
| TS <sub>S</sub>           | 0.279592                                                                                                   | -2490.024350                                                                           | 246.78 <i>i</i>                                    |        |
| TS <sub>T</sub>           | 0.273263                                                                                                   | -2490.008288                                                                           | 348.44 <i>i</i>                                    | 2.1690 |
| INT2 <sub>S</sub>         | 0.280196                                                                                                   | -2490.047167                                                                           |                                                    |        |
| INT2 <sub>T</sub>         | 0.274573                                                                                                   | -2490.048606                                                                           |                                                    | 2.5545 |
| INT2 <sub>Q</sub>         | 0.273432                                                                                                   | -2490.036137                                                                           |                                                    | 6.0172 |
|                           |                                                                                                            |                                                                                        |                                                    |        |
| Stationary<br>point       | Corrected thermal<br>correction to Gibbs free<br>energy at ωB97XD/6-<br>31G(d,p)/ECP10MDF(Co)<br>(in a.u.) | Single-point energy<br>including solvation energy<br>at ωB97XD/def2-TZVPP<br>(in a.u.) | Imaginary<br>frequencies<br>(in cm <sup>-1</sup> ) |        |
| <b>ethylene<br/>(R=H)</b> |                                                                                                            |                                                                                        |                                                    |        |
| INT1 <sub>S</sub>         | 0.28352                                                                                                    | -2490.506896                                                                           |                                                    |        |
| INT1 <sub>T</sub>         | 0.274313                                                                                                   | -2490.507394                                                                           |                                                    | 2.1806 |
| INT1 <sub>Q</sub>         | 0.265456                                                                                                   | -2490.464761                                                                           |                                                    | 6.0541 |
| TS <sub>S</sub>           | 0.284767                                                                                                   | -2490.498844                                                                           | 309.73 <i>i</i>                                    |        |
| TS <sub>T</sub>           | 0.276878                                                                                                   | -2490.478604                                                                           | 422.17 <i>i</i>                                    | 2.4207 |
| INT2 <sub>S</sub>         | 0.285027                                                                                                   | -2490.528602                                                                           |                                                    |        |
| INT2 <sub>T</sub>         | 0.277413                                                                                                   | -2490.536060                                                                           |                                                    | 2.6270 |
| INT2 <sub>Q</sub>         | 0.275592                                                                                                   | -2490.524600                                                                           |                                                    | 6.0099 |
|                           |                                                                                                            |                                                                                        |                                                    |        |



**Table S3.** Calculated energies and imaginary frequencies in Section 2.

| Stationary point             | Corrected thermal correction to Gibbs free energy at B3LYP-D3(BJ)/6-31G(d,p)/ECP10MDF(Co) (in a.u.) | Single-point energy including solvation energy at B3LYP-D3(BJ)/def2-TZVP (in a.u.) | Imaginary frequencies (in cm <sup>-1</sup> ) | $\langle \hat{S}^2 \rangle$ |
|------------------------------|-----------------------------------------------------------------------------------------------------|------------------------------------------------------------------------------------|----------------------------------------------|-----------------------------|
| <b>1</b>                     | 0.175195                                                                                            | -802.0801197                                                                       |                                              |                             |
| <b>2</b>                     | 0.139646                                                                                            | -501.7921931                                                                       |                                              |                             |
| <b>HOAc</b>                  | 0.020787                                                                                            | -229.2025157                                                                       |                                              |                             |
| <b>Co(OAc)<sub>3</sub>_S</b> | 0.087574                                                                                            | -2068.703606                                                                       |                                              |                             |
| <b>Co(OAc)<sub>3</sub>_T</b> | 0.080782                                                                                            | -2068.685336                                                                       |                                              |                             |
| <b>Co(OAc)<sub>3</sub>_Q</b> | 0.076228                                                                                            | -2068.68193                                                                        |                                              |                             |
| <b>2s_S</b>                  | 0.296006                                                                                            | -2870.810189                                                                       |                                              |                             |
| <b>2s_T</b>                  | 0.290521                                                                                            | -2870.79542                                                                        |                                              | 2.0509                      |
| <b>2s_Q</b>                  | 0.28613                                                                                             | -2870.784587                                                                       |                                              | 6.0106                      |
| <b>TS1s_S</b>                | 0.293956                                                                                            | -2870.803476                                                                       | 171.53 <i>i</i>                              |                             |
| <b>TS1s_T</b>                | 0.284495                                                                                            | -2870.778517                                                                       | 725.28 <i>i</i>                              | 2.0858                      |
| <b>TS1s_Q</b>                | 0.282027                                                                                            | -2870.774204                                                                       | 765.18 <i>i</i>                              | 6.0112                      |
| <b>3s_S</b>                  | 0.246128                                                                                            | -2641.590524                                                                       |                                              |                             |
| <b>3s_T</b>                  | 0.24008                                                                                             | -2641.581796                                                                       |                                              | 2.0417                      |
| <b>3s_Q</b>                  | 0.231221                                                                                            | -2641.578569                                                                       |                                              | 6.0405                      |
| <b>TS2s_S</b>                | 0.243208                                                                                            | -2641.563407                                                                       | 889.94 <i>i</i>                              |                             |
| <b>TS2s_T</b>                | 0.237329                                                                                            | -2641.552359                                                                       | 668.23 <i>i</i>                              | 2.0719                      |
| <b>TS2s_Q</b>                | 0.230406                                                                                            | -2641.532014                                                                       | 849.68 <i>i</i>                              | 6.0329                      |
| <b>4_S</b>                   | 0.247189                                                                                            | -2641.583897                                                                       |                                              |                             |
| <b>4_T</b>                   | 0.238198                                                                                            | -2641.580408                                                                       |                                              | 2.0845                      |
| <b>4_Q</b>                   | 0.231851                                                                                            | -2641.53811                                                                        |                                              | 6.0307                      |
| <b>5s_S</b>                  | 0.373972                                                                                            | -2914.16725224                                                                     |                                              |                             |
| <b>5s_T</b>                  | 0.362724                                                                                            | -2914.17413704                                                                     |                                              | 2.0859                      |
| <b>5s_Q</b>                  | 0.356751                                                                                            | -2914.13227560                                                                     |                                              | 6.0305                      |

|                    |          |                |                  |        |
|--------------------|----------|----------------|------------------|--------|
| <b>MECP1</b>       | 0.373332 | -2914.16636660 |                  |        |
| <b>TS1_S</b>       | 0.374164 | -2914.15504073 | 276.70 <i>i</i>  |        |
| <b>TS1_T</b>       | 0.365374 | -2914.13958240 | 402.70 <i>i</i>  | 2.4341 |
| <b>MECP2</b>       | 0.372843 | -2914.19053650 |                  |        |
| <b>5_S</b>         | 0.376128 | -2914.19216765 |                  |        |
| <b>5_T</b>         | 0.366269 | -2914.19970917 |                  | 2.6328 |
| <b>5_Q</b>         | 0.363259 | -2914.19069426 |                  | 6.0347 |
| <b>4s_AQ_S</b>     | 0.458896 | -3443.6700968  |                  |        |
| <b>4s_AQ_T</b>     | 0.451839 | -3443.6698974  |                  | 2.0489 |
| <b>4s_AQ_Q</b>     | 0.443044 | -3443.6702150  |                  | 6.0420 |
| <b>TS2s_AQ_S</b>   | 0.455781 | -3443.6651601  | 1098.36 <i>i</i> |        |
| <b>5s_AQ_S</b>     | 0.405915 | -3214.4586602  |                  |        |
| <b>5s_AQ_T</b>     | 0.40023  | -3214.4559216  |                  | 2.0566 |
| <b>5s_AQ_Q</b>     | 0.396284 | -3214.4446375  |                  | 6.0382 |
| <b>TS3s_AQ_S</b>   | 0.40706  | -3214.4507183  | 841.45 <i>i</i>  |        |
| <b>6s_AQ_S</b>     | 0.409404 | -3214.4734202  |                  |        |
| <b>6s_AQ_T</b>     | 0.401096 | -3214.4536140  |                  | 2.1015 |
| <b>6s_AQ_Q</b>     | 0.395863 | -3214.4137107  |                  | 6.0177 |
| <b>7s_AQ_S</b>     | 0.535096 | -3487.0488206  |                  |        |
| <b>5s_AgOAc_S</b>  | 0.403865 | -3289.8582187  |                  |        |
| <b>5s_AgOAc_T</b>  | 0.399388 | -3289.8744661  |                  | 2.0754 |
| <b>5s_AgOAc_Q</b>  | 0.389089 | -3289.8383568  |                  | 6.0407 |
| <b>TS1_AgOAc_S</b> | 0.406387 | -3289.8536729  | 199.28 <i>i</i>  |        |
| <b>TS1_AgOAc_T</b> | 0.399085 | -3289.84103100 | 429.27 <i>i</i>  | 2.3940 |
| <b>5_AgOAc_S</b>   | 0.408316 | -3289.89554680 |                  |        |
| <b>TS2_S</b>       | 0.374982 | -2914.15821894 | 115.87 <i>i</i>  |        |
| <b>TS2_T</b>       | 0.366985 | -2914.16830200 | 266.46 <i>i</i>  | 2.4674 |
| <b>TS2_Q</b>       | 0.361781 | -2914.14536129 | 497.41 <i>i</i>  | 6.0349 |
| <b>6_S</b>         | 0.376337 | -2914.19690278 |                  |        |

|                           |          |                |                  |        |
|---------------------------|----------|----------------|------------------|--------|
| <b>6_T</b>                | 0.365623 | -2914.19125863 |                  | 2.3508 |
| <b>8_Q</b>                | 0.359271 | -2914.18437906 |                  |        |
| <b>MECP3</b>              | 0.37186  | -2914.19174310 |                  |        |
| <b>TS3_S</b>              | 0.36921  | -2914.14198480 | 1218.73 <i>i</i> |        |
| <b>TS3_T</b>              | 0.363247 | -2914.13273734 | 846.40 <i>i</i>  | 2.3626 |
| <b>TS3_Q</b>              | 0.353762 | -2914.12151620 | 701.74 <i>i</i>  | 6.0151 |
| <b>MECP4</b>              | 0.320319 | -2684.93408690 |                  |        |
| <b>7_S</b>                | 0.323448 | -2684.94265164 |                  |        |
| <b>7_T</b>                | 0.313728 | -2684.93854796 |                  | 2.1626 |
| <b>7_Q</b>                | 0.313441 | -2684.90661796 |                  | 6.0135 |
| <b>TS3_betaH_S</b>        | 0.36633  | -2914.13380522 | 559.75 <i>i</i>  |        |
| <b>TS3_betaH_T</b>        | 0.357612 | -2914.12776138 | 762.39 <i>i</i>  |        |
| <b>6_Co(IV)_doublet</b>   | 0.415804 | -3142.73785968 |                  |        |
| <b>6_Co(IV)_quartet</b>   | 0.403678 | -3142.75354969 |                  |        |
| <b>6_Co(IV)_sextet</b>    | 0.393921 | -3142.74410530 |                  |        |
| <b>TS3_Co(IV)_doublet</b> | 0.407975 | -3142.68055466 | 885.58 <i>i</i>  |        |
| <b>TS3_Co(IV)_quartet</b> | 0.399436 | -3142.68115845 | 1032.77 <i>i</i> |        |
| <b>TS4_T</b>              | 0.362628 | -2914.18241890 | 76.35 <i>i</i>   | 2.9734 |
| <b>TS4'_T'</b>            | 0.364012 | -2914.14223252 | 129.60 <i>i</i>  |        |
| <b>8_OSS</b>              | 0.364605 | -2914.16829407 |                  |        |
| <b>8_T'</b>               | 0.363300 | -2914.16783821 |                  |        |
| <b>8_T</b>                | 0.361852 | -2914.18418150 |                  | 3.0121 |
| <b>TS5_OSS</b>            | 0.368299 | -2914.16039146 | 388.03 <i>i</i>  |        |
| <b>TS5_T'</b>             | 0.369447 | -2914.16033456 | 388.44 <i>i</i>  |        |
| <b>TS5_T</b>              | 0.364151 | -2914.17378310 | 389.21 <i>i</i>  | 3.0350 |
| <b>TS5_Q</b>              | 0.362520 | -2914.17191679 | 385.56 <i>i</i>  |        |
| <b>9_OSS</b>              | 0.376691 | -2914.20133379 |                  |        |
| <b>9_T'</b>               | 0.371876 | -2914.20168806 |                  |        |
| <b>9_T</b>                | 0.364943 | -2914.21713230 |                  | 3.0134 |

|                 |          |                |                  |        |
|-----------------|----------|----------------|------------------|--------|
| <b>9_Q</b>      | 0.366163 | -2914.21653491 |                  |        |
| <b>10s_OSS</b>  | 0.417789 | -3143.41263733 |                  | 1.3457 |
| <b>10s_T'</b>   | 0.416486 | -3143.41266133 |                  | 2.3479 |
| <b>10s_Q</b>    | 0.412435 | -3143.42987782 |                  | 6.0555 |
| <b>10s_T</b>    | 0.413479 | -3143.42994980 |                  | 3.0550 |
| <b>TS6s_OSS</b> | 0.413075 | -3143.40525988 | 1041.78 <i>i</i> | 1.3247 |
| <b>TS6s_T'</b>  | 0.411143 | -3143.40489706 | 1040.96 <i>i</i> | 2.3099 |
| <b>TS6s_Q</b>   | 0.409939 | -3143.42491866 | 1054.68 <i>i</i> | 6.0551 |
| <b>TS6s_T</b>   | 0.410547 | -3143.42494420 | 1055.11 <i>i</i> | 3.0548 |
| <b>11s_OSS</b>  | 0.416952 | -3143.40901077 |                  | 1.3913 |
| <b>11s_T'</b>   | 0.414297 | -3143.40869768 |                  | 2.2691 |
| <b>11s_Q</b>    | 0.413438 | -3143.42798897 |                  | 6.0549 |
| <b>11s_T</b>    | 0.412669 | -3143.43025030 |                  | 3.0544 |
| <b>10_OSS</b>   | 0.417563 | -3143.41452010 |                  | 1.3249 |
| <b>10_T'</b>    | 0.414984 | -3143.41276511 |                  | 2.3585 |
| <b>10_Q</b>     | 0.412790 | -3143.43247781 |                  | 6.0510 |
| <b>10_T</b>     | 0.412398 | -3143.43266970 |                  | 3.0390 |
| <b>TS6_OSS</b>  | 0.412613 | -3143.37924006 | 1458.22 <i>i</i> | 1.3702 |
| <b>TS6_Q</b>    | 0.408082 | -3143.39630403 | 1705.77 <i>i</i> | 6.0165 |
| <b>TS6_T</b>    | 0.411512 | -3143.40807248 | 1110.99 <i>i</i> | 2.6817 |
| <b>11_S</b>     | 0.423893 | -3143.42827798 |                  |        |
| <b>11_T</b>     | 0.415191 | -3143.46450336 |                  | 2.1039 |
| <b>11_Q</b>     | 0.414051 | -3143.43149050 |                  | 6.0207 |
| <b>TS7_S</b>    | 0.371718 | -2914.13608908 | 247.50 <i>i</i>  |        |
| <b>TS7_T</b>    | 0.362930 | -2914.15118340 | 666.67 <i>i</i>  | 2.5138 |
| <b>12_S</b>     | 0.371514 | -2914.15994742 |                  |        |
| <b>12_T</b>     | 0.367119 | -2914.18194580 |                  | 2.2935 |
| <b>12_Q</b>     | 0.365557 | -2914.17064150 |                  | 6.0254 |
| <b>TS8_S</b>    | 0.370416 | -2914.12395301 | 564.47 <i>i</i>  |        |

|               |          |                |                  |        |
|---------------|----------|----------------|------------------|--------|
| <b>TS8_T</b>  | 0.364082 | -2914.15277721 | 637.12 <i>i</i>  | 2.3935 |
| <b>TS8_Q</b>  | 0.361029 | -2914.14617970 | 846.84 <i>i</i>  | 6.0284 |
| <b>13_S</b>   | 0.374332 | -2914.17459961 |                  |        |
| <b>13_T</b>   | 0.370597 | -2914.20946695 |                  | 2.0841 |
| <b>13_Q</b>   | 0.368070 | -2914.17496823 |                  | 6.0276 |
| <b>14_S</b>   | 0.370523 | -2914.16414385 |                  |        |
| <b>14_T</b>   | 0.361418 | -2914.16898474 |                  | 2.0880 |
| <b>14_Q</b>   | 0.354961 | -2914.12670765 |                  | 6.0343 |
| <b>TS9_S</b>  | 0.373296 | -2914.15425201 | 264.09 <i>i</i>  |        |
| <b>TS9_T</b>  | 0.364768 | -2914.13578699 | 400.95 <i>i</i>  | 2.3902 |
| <b>15_S</b>   | 0.374143 | -2914.18991485 |                  |        |
| <b>15_T</b>   | 0.365640 | -2914.19741391 |                  | 2.5548 |
| <b>15_Q</b>   | 0.364166 | -2914.18665254 |                  | 6.0327 |
| <b>TS10_S</b> | 0.372973 | -2914.12062579 | 302.79 <i>i</i>  |        |
| <b>TS10_T</b> | 0.365367 | -2914.17158637 | 304.51 <i>i</i>  | 2.4866 |
| <b>TS10_Q</b> | 0.361236 | -2914.15421690 | 571.65 <i>i</i>  | 6.0411 |
| <b>16_S</b>   | 0.374231 | -2914.20147056 |                  |        |
| <b>16_T</b>   | 0.367587 | -2914.19287561 |                  | 2.3740 |
| <b>16_Q</b>   | 0.361042 | -2914.18318424 |                  | 6.0129 |
| <b>TS11_S</b> | 0.370056 | -2914.09855330 | 1274.41 <i>i</i> |        |
| <b>TS11_T</b> | 0.359380 | -2914.11561940 | 1533.78 <i>i</i> | 2.1401 |
| <b>TS11_Q</b> | 0.360739 | -2914.08441370 | 1447.47 <i>i</i> | 6.2928 |
| <b>17_S</b>   | 0.323431 | -2684.90612840 |                  |        |
| <b>17_T</b>   | 0.317324 | -2684.90956720 |                  | 2.0588 |
| <b>17_Q</b>   | 0.310579 | -2684.91328940 |                  | 6.0167 |
| <b>TS12_S</b> | 0.372387 | -2914.13332051 | 328.62 <i>i</i>  |        |
| <b>TS12_T</b> | 0.365135 | -2914.15582816 | 503.58 <i>i</i>  | 2.3914 |
| <b>TS12_Q</b> | 0.365496 | -2914.14241083 | 677.32 <i>i</i>  | 6.0258 |
| <b>18_S</b>   | 0.373808 | -2914.16478637 |                  |        |

|               |          |                |                 |        |
|---------------|----------|----------------|-----------------|--------|
| <b>18_T</b>   | 0.367173 | -2914.19417320 |                 | 2.1640 |
| <b>18_Q</b>   | 0.366090 | -2914.16934885 |                 | 6.0224 |
| <b>19_S</b>   | 0.371410 | -2914.16222403 |                 |        |
| <b>19_T</b>   | 0.366640 | -2914.17347940 |                 | 2.0882 |
| <b>19_Q</b>   | 0.363386 | -2914.12162173 |                 | 6.0346 |
| <b>TS13_S</b> | 0.373876 | -2914.15287921 | 246.93 <i>i</i> |        |
| <b>TS13_T</b> | 0.365639 | -2914.13121701 | 358.68 <i>i</i> | 2.1973 |
| <b>20_S</b>   | 0.375191 | -2914.15510099 |                 |        |
| <b>20_T</b>   | 0.365232 | -2914.17545392 |                 | 2.1893 |
| <b>20_Q</b>   | 0.362785 | -2914.15495612 |                 | 6.0108 |
| <b>TS14_S</b> | 0.372725 | -2914.11206823 | 437.27 <i>i</i> |        |
| <b>TS14_T</b> | 0.366974 | -2914.13916026 | 402.10 <i>i</i> | 2.1301 |
| <b>TS14_Q</b> | 0.366860 | -2914.11155427 | 610.24 <i>i</i> | 6.0309 |
| <b>21_S</b>   | 0.375076 | -2914.16220429 |                 |        |
| <b>21_T</b>   | 0.366262 | -2914.18368283 |                 | 2.1409 |
| <b>21_Q</b>   | 0.364072 | -2914.16898838 |                 | 6.0233 |
| <b>22_S</b>   | 0.370300 | -2914.16485728 |                 |        |
| <b>22_T</b>   | 0.368092 | -2914.17207433 |                 | 2.0899 |
| <b>22_Q</b>   | 0.359707 | -2914.12594603 |                 | 6.0138 |
| <b>TS15_S</b> | 0.373482 | -2914.15470376 | 285.95 <i>i</i> |        |
| <b>TS15_T</b> | 0.364846 | -2914.13298274 | 381.94 <i>i</i> | 2.1840 |
| <b>23_S</b>   | 0.373604 | -2914.15355831 |                 |        |
| <b>23_T</b>   | 0.365205 | -2914.17839024 |                 | 2.2164 |
| <b>23_Q</b>   | 0.362511 | -2914.15209481 |                 | 6.0116 |
| <b>TS16_S</b> | 0.372365 | -2914.11534295 | 427.66 <i>i</i> |        |
| <b>TS16_T</b> | 0.363984 | -2914.13673755 | 449.58 <i>i</i> | 2.2394 |
| <b>TS16_Q</b> | 0.365350 | -2914.11713371 | 556.47 <i>i</i> | 6.0305 |
| <b>24_S</b>   | 0.375423 | -2914.16929412 |                 |        |
| <b>24_T</b>   | 0.366380 | -2914.19031895 |                 | 2.1359 |

|      |          |                |  |        |
|------|----------|----------------|--|--------|
| 24_Q | 0.362991 | -2914.17428920 |  | 6.0233 |
|------|----------|----------------|--|--------|

#### 4. Cartesian coordinates of all optimized structures.

##### INT1\_H\_Q

|    |             |             |             |
|----|-------------|-------------|-------------|
| C  | 4.40081200  | -2.62115000 | -1.02786500 |
| C  | 3.50972100  | -3.59175400 | -1.51091600 |
| C  | 2.15064000  | -3.30618400 | -1.56802400 |
| C  | 1.69476000  | -2.04866800 | -1.13714100 |
| C  | 2.56508900  | -1.05093000 | -0.63529100 |
| C  | 3.93132600  | -1.37310300 | -0.60631600 |
| H  | 5.46394500  | -2.84681200 | -0.98277400 |
| H  | 3.88188900  | -4.55676400 | -1.84268400 |
| H  | 1.44150600  | -4.03685400 | -1.94748300 |
| H  | 4.64997700  | -0.64388200 | -0.23359800 |
| C  | 0.25057800  | -1.73916500 | -1.20076800 |
| O  | -0.62593400 | -2.56318400 | -1.48079800 |
| N  | -0.00481500 | -0.39341500 | -0.87812200 |
| C  | -1.15072000 | 0.25835300  | -1.12930500 |
| C  | -1.15537600 | 1.64150800  | -0.68018000 |
| C  | -2.31064600 | -0.23176800 | -1.78134900 |
| C  | -2.30057800 | 2.45559900  | -0.85819700 |
| C  | -3.42918700 | 0.58867600  | -1.95118900 |
| H  | -2.32150300 | -1.25331700 | -2.13263300 |
| C  | 0.01184300  | 3.36300000  | 0.33634500  |
| C  | -2.23736200 | 3.78750800  | -0.38795800 |
| C  | -3.44380100 | 1.90249400  | -1.50072700 |
| H  | -4.30623600 | 0.18401500  | -2.44571000 |
| C  | -1.07868500 | 4.23996500  | 0.21241300  |
| H  | 0.93762200  | 3.68382100  | 0.80356300  |
| H  | -3.09883700 | 4.43737100  | -0.50690600 |
| H  | -4.32193100 | 2.52556500  | -1.63809700 |
| H  | -0.99427200 | 5.25463900  | 0.58430300  |
| N  | -0.02532200 | 2.10596300  | -0.09950100 |
| Co | 1.58043700  | 0.62490600  | 0.06631800  |
| C  | 0.24560800  | 0.17950200  | 2.30393000  |
| C  | 1.09457200  | -0.85398800 | 2.20467000  |
| C  | 3.37358900  | 2.44373000  | -0.10213600 |
| O  | 2.95967900  | 1.86699400  | 0.97382000  |
| O  | 2.86157800  | 2.16017600  | -1.21745800 |
| C  | 4.48976900  | 3.45095000  | 0.01425800  |
| H  | 5.39451500  | 2.94579500  | 0.36924900  |
| H  | 4.69276000  | 3.92493700  | -0.94722500 |
| H  | 4.22654400  | 4.21125800  | 0.75608300  |
| H  | 0.53770100  | 1.11199200  | 2.78002900  |

|   |             |             |            |
|---|-------------|-------------|------------|
| H | 0.79417000  | -1.79715600 | 1.75867800 |
| H | 2.10557400  | -0.80051600 | 2.60015400 |
| H | -0.77591800 | 0.11344000  | 1.94119500 |

##### INT1\_H\_S

|    |             |             |             |
|----|-------------|-------------|-------------|
| C  | 4.43910900  | -2.36254100 | -0.42554600 |
| C  | 3.77638600  | -3.25297700 | -1.27833000 |
| C  | 2.44778100  | -3.01590800 | -1.62905900 |
| C  | 1.79535200  | -1.88912800 | -1.11952200 |
| C  | 2.45185000  | -0.99447600 | -0.25767700 |
| C  | 3.78117100  | -1.23665400 | 0.08710200  |
| H  | 5.47576700  | -2.54669200 | -0.15475800 |
| H  | 4.29666000  | -4.12397000 | -1.66595900 |
| H  | 1.91174300  | -3.68743500 | -2.29444100 |
| H  | 4.31224100  | -0.56040700 | 0.75157900  |
| C  | 0.39289400  | -1.54865500 | -1.47101400 |
| O  | -0.32381500 | -2.24546400 | -2.21603700 |
| N  | 0.03061800  | -0.37209700 | -0.88471900 |
| C  | -1.14153200 | 0.33193200  | -1.12445700 |
| C  | -1.14509300 | 1.64714200  | -0.56126300 |
| C  | -2.26584600 | -0.07640600 | -1.83678900 |
| C  | -2.24791700 | 2.52723600  | -0.72826600 |
| C  | -3.36378800 | 0.80063200  | -1.99503800 |
| H  | -2.29123900 | -1.06463700 | -2.27220700 |
| C  | 0.04262900  | 3.22580200  | 0.67692300  |
| C  | -2.14133700 | 3.81439400  | -0.14258700 |
| C  | -3.37241600 | 2.07374800  | -1.46432800 |
| H  | -4.22374300 | 0.44950100  | -2.55818500 |
| C  | -1.00248500 | 4.16300300  | 0.54991200  |
| H  | 0.94920800  | 3.46288500  | 1.22403600  |
| H  | -2.96415600 | 4.51519900  | -0.24941900 |
| H  | -4.22126700 | 2.73630400  | -1.59979100 |
| H  | -0.89444100 | 5.14099300  | 1.00504900  |
| N  | -0.03153200 | 2.01672300  | 0.14216400  |
| Co | 1.33520400  | 0.52963900  | 0.15169700  |
| C  | 0.26267700  | 0.15974100  | 2.08042500  |
| C  | 1.13545000  | -0.87502600 | 1.95012300  |
| C  | 3.06208000  | 2.01475500  | -0.35426800 |
| O  | 2.81161600  | 1.65613500  | 0.84723500  |
| O  | 2.30646000  | 1.49985400  | -1.25127600 |
| C  | 4.17918200  | 2.93875700  | -0.69613500 |
| H  | 5.10193600  | 2.35108000  | -0.76871300 |
| H  | 3.99508800  | 3.42257600  | -1.65686000 |
| H  | 4.30658000  | 3.68261900  | 0.09331800  |



H 0.53570900 1.05692400 2.62679600  
H 0.81332500 -1.83266100 1.55844300  
H 2.12510400 -0.83274000 2.39187200  
H -0.77813200 0.05385100 1.79462900

H 4.36629900 3.82971600 0.52498700  
H 0.35656900 1.10257000 2.64570900  
H 0.82977500 -1.80399700 1.70401700  
H 2.05961300 -0.69460700 2.52737700  
H -0.87305400 -0.00899500 1.82340100

INT1\_H\_T

C 4.38630600 -2.41028000 -0.56519300  
C 3.65869300 -3.39529800 -1.24399400  
C 2.33119000 -3.16132300 -1.60075600  
C 1.74645700 -1.93552500 -1.27227000  
C 2.47361000 -0.94690600 -0.59448900  
C 3.79915100 -1.18075000 -0.23723500  
H 5.41958000 -2.60019100 -0.28669000  
H 4.12962800 -4.34241100 -1.48975100  
H 1.74432400 -3.91152800 -2.12391000  
H 4.37566500 -0.43138600 0.29673200  
C 0.33744200 -1.59606400 -1.58473900  
O -0.45555300 -2.35474800 -2.16119400  
N 0.05494200 -0.32955300 -1.12959800  
C -1.17392800 0.32360400 -1.23580300  
C -1.17259600 1.64326200 -0.68755400  
C -2.35348900 -0.15048100 -1.79696700  
C -2.33434000 2.45835400 -0.70679500  
C -3.50996600 0.66602200 -1.81852200  
H -2.38258400 -1.14413100 -2.21977900  
C 0.07344600 3.29253900 0.39781800  
C -2.22774100 3.74802900 -0.13008100  
C -3.51892600 1.93939200 -1.29207600  
H -4.41312200 0.26383700 -2.26779400  
C -1.03198300 4.16301300 0.41858500  
H 1.02856800 3.57924600 0.82552300  
H -3.09629300 4.40008900 -0.12597800  
H -4.41306200 2.55405300 -1.31512100  
H -0.92656900 5.14424600 0.86695300  
N 0.00242700 2.08055500 -0.13633000  
Co 1.42583300 0.64616600 -0.25975300  
C 0.13627800 0.13746500 2.19799300  
C 1.05656800 -0.83256500 2.13307400  
C 3.36099900 2.18957500 -0.41131100  
O 2.83278600 1.69896600 0.65812000  
O 2.88099200 1.85820300 -1.52877000  
C 4.53700100 3.11247200 -0.28194400  
H 5.41998200 2.51853800 -0.02002000  
H 4.72416600 3.63437800 -1.22121200

TS\_H\_S

C -4.83223300 -1.62956000 0.24222000  
C -4.47030200 -2.38142700 1.36566700  
C -3.14732700 -2.37771400 1.80827600  
C -2.18837500 -1.63029700 1.12165400  
C -2.54153500 -0.88930900 -0.02686200  
C -3.87199300 -0.89495200 -0.45747300  
H -5.86440400 -1.62324600 -0.09655900  
H -5.22002300 -2.95985500 1.89703300  
H -2.84963200 -2.93005300 2.69481600  
H -4.15905900 -0.33740900 -1.34431900  
C -0.80107400 -1.48312800 1.64477000  
O -0.32218800 -2.21512700 2.53336800  
N -0.19312000 -0.42101200 1.05965700  
C 1.02907700 0.12750100 1.42173900  
C 1.26019000 1.40420200 0.82544500  
C 2.00451600 -0.39041400 2.26653800  
C 2.44450500 2.14403000 1.07776100  
C 3.18618500 0.34702700 2.51477900  
H 1.85337000 -1.35365400 2.73279100  
C 0.41361700 3.05918800 -0.58451700  
C 2.56515500 3.40546400 0.44125200  
C 3.41678700 1.58266800 1.94575600  
H 3.92998100 -0.08309300 3.17921700  
C 1.55601900 3.85899300 -0.38029200  
H -0.39447900 3.37973100 -1.23263000  
H 3.45620500 4.00295300 0.60999200  
H 4.32719500 2.13643200 2.15149400  
H 1.62214100 4.81923100 -0.87899800  
N 0.27381500 1.87878000 0.00159500  
Co -1.18793700 0.59779800 -0.18967900  
C -0.24250400 -0.18346200 -1.73307800  
C -1.32638200 -1.09323500 -1.62863500  
C -2.88311200 2.27096600 -0.11175500  
O -2.35562500 1.81576600 -1.19233700  
O -2.45616100 1.79220800 0.98477100  
C -3.97473700 3.29055100 -0.17082100  
H -4.91080600 2.78062000 -0.42687200

|   |             |             |             |
|---|-------------|-------------|-------------|
| H | -4.09320300 | 3.78330000  | 0.79546900  |
| H | -3.76438200 | 4.02462100  | -0.95250700 |
| H | -0.27751100 | 0.58751200  | -2.49850000 |
| H | -2.14247200 | -0.99493100 | -2.33549900 |
| H | -1.11319500 | -2.10959400 | -1.31683300 |
| H | 0.74940300  | -0.51144300 | -1.43832900 |

|   |             |             |             |
|---|-------------|-------------|-------------|
| H | 2.89229800  | 3.68587000  | -1.64557400 |
| H | 1.40990700  | 3.80104200  | -2.60358700 |
| H | 1.58485800  | 4.76048300  | -1.09839400 |
| H | -0.05645700 | 1.48645900  | 2.58965100  |
| H | 2.26415900  | 0.67125100  | 2.57096800  |
| H | 1.65806900  | -1.06070200 | 2.56014600  |
| H | -0.66941700 | -0.25554500 | 2.50187100  |

TS\_H\_T

|    |             |             |             |
|----|-------------|-------------|-------------|
| C  | 4.55039000  | -0.44282900 | -0.18688000 |
| C  | 4.39409900  | -1.74893000 | -0.66105200 |
| C  | 3.14565300  | -2.36903200 | -0.59726900 |
| C  | 2.05008100  | -1.69167200 | -0.05546200 |
| C  | 2.22494900  | -0.39196700 | 0.46422700  |
| C  | 3.47089200  | 0.23178000  | 0.39085400  |
| H  | 5.51716800  | 0.04829500  | -0.24982800 |
| H  | 5.23993300  | -2.27508300 | -1.09304800 |
| H  | 2.99421500  | -3.36804300 | -0.99598700 |
| H  | 3.60532900  | 1.23221600  | 0.79140400  |
| C  | 0.67474000  | -2.27454800 | -0.14886400 |
| O  | 0.47695200  | -3.49507400 | -0.31293600 |
| N  | -0.25068900 | -1.28628700 | -0.09101000 |
| C  | -1.62516700 | -1.42739800 | -0.20168300 |
| C  | -2.34364700 | -0.18695900 | -0.09599700 |
| C  | -2.36083000 | -2.59064400 | -0.40363100 |
| C  | -3.76104800 | -0.14617100 | -0.19815000 |
| C  | -3.77108800 | -2.54304800 | -0.50138500 |
| H  | -1.84191800 | -3.53512900 | -0.48888800 |
| C  | -2.22757200 | 2.12776000  | 0.21666900  |
| C  | -4.38671300 | 1.12048700  | -0.08729100 |
| C  | -4.46927900 | -1.35896400 | -0.40456300 |
| H  | -4.30928500 | -3.47309900 | -0.65968300 |
| C  | -3.62554900 | 2.25206500  | 0.11328300  |
| H  | -1.59197600 | 2.99007200  | 0.38797300  |
| H  | -5.46840900 | 1.18426100  | -0.16201700 |
| H  | -5.55136800 | -1.33260100 | -0.48472000 |
| H  | -4.07960900 | 3.23253100  | 0.20055300  |
| N  | -1.61496700 | 0.95584100  | 0.11225300  |
| Co | 0.36043700  | 0.56792000  | 0.30492600  |
| C  | 0.14503200  | 0.44615200  | 2.35265900  |
| C  | 1.47754900  | -0.02356800 | 2.30113000  |
| C  | 1.23977500  | 2.66051600  | -0.79442500 |
| O  | 0.94618700  | 2.78126100  | 0.43021000  |
| O  | 1.08799000  | 1.52358400  | -1.36828100 |
| C  | 1.80461000  | 3.80844200  | -1.58458400 |

INT2\_H\_Q

|    |             |             |             |
|----|-------------|-------------|-------------|
| C  | 5.13482500  | -1.58684500 | -0.03061700 |
| C  | 5.03651800  | -1.06997500 | -1.32478000 |
| C  | 3.77975200  | -0.86230400 | -1.88690400 |
| C  | 2.61141700  | -1.12984000 | -1.15897900 |
| C  | 2.70471400  | -1.66784500 | 0.13969400  |
| C  | 3.97662100  | -1.89171900 | 0.68293600  |
| H  | 6.10897200  | -1.76375000 | 0.41612300  |
| H  | 5.93223500  | -0.83763600 | -1.89313000 |
| H  | 3.68901400  | -0.47539600 | -2.89761900 |
| H  | 4.05247300  | -2.31733500 | 1.68042000  |
| C  | 1.30153400  | -0.86243600 | -1.85602300 |
| O  | 1.11430300  | -1.38822700 | -2.97198800 |
| N  | 0.45846200  | -0.01827100 | -1.20809000 |
| C  | -0.82379000 | 0.27957400  | -1.68308300 |
| C  | -1.49528800 | 1.35306900  | -1.00262800 |
| C  | -1.52037400 | -0.35610700 | -2.70846000 |
| C  | -2.81311000 | 1.75281900  | -1.36652400 |
| C  | -2.83010500 | 0.04237200  | -3.06192600 |
| H  | -1.04645700 | -1.16249100 | -3.24690000 |
| C  | -1.39492500 | 2.98539100  | 0.66852000  |
| C  | -3.39404100 | 2.82477400  | -0.64498800 |
| C  | -3.47678900 | 1.07367400  | -2.41926000 |
| H  | -3.32792300 | -0.48708200 | -3.86928700 |
| C  | -2.69105900 | 3.44125400  | 0.36735700  |
| H  | -0.80534800 | 3.44182800  | 1.45722300  |
| H  | -4.39765100 | 3.15015700  | -0.90344300 |
| H  | -4.47985100 | 1.37886500  | -2.69995900 |
| H  | -3.11390800 | 4.26347500  | 0.93325400  |
| N  | -0.82560300 | 1.98446700  | 0.00865100  |
| Co | 1.02169300  | 1.13007900  | 0.37516500  |
| C  | 1.08992400  | -0.83326100 | 1.86057800  |
| C  | 1.47885000  | -1.97954400 | 0.97735100  |
| C  | 2.79863800  | 2.66053000  | 1.19176200  |
| O  | 1.72212600  | 2.59710900  | 1.86522300  |
| O  | 2.89915100  | 1.97770000  | 0.11321900  |

|   |            |             |            |   |             |             |             |
|---|------------|-------------|------------|---|-------------|-------------|-------------|
| C | 3.95882200 | 3.48917100  | 1.66481300 | O | 2.52174500  | 2.25056900  | -0.53670600 |
| H | 4.62242100 | 2.84697800  | 2.25602500 | C | 3.73401300  | 3.40148200  | 1.21803600  |
| H | 4.52795400 | 3.87514000  | 0.81661700 | H | 4.63477900  | 2.84360500  | 1.49916900  |
| H | 3.61524700 | 4.30750400  | 2.30022400 | H | 3.99610000  | 4.13103900  | 0.45014700  |
| H | 1.86498400 | -0.35058900 | 2.45516500 | H | 3.35728400  | 3.90461500  | 2.11197900  |
| H | 1.70373600 | -2.85603900 | 1.60803700 | H | 0.64910900  | -0.31854200 | 2.36149500  |
| H | 0.63419100 | -2.26522500 | 0.34406000 | H | 1.57439300  | -2.48899900 | 1.87879900  |
| H | 0.07493800 | -0.78610600 | 2.25111300 | H | 0.74150000  | -2.57804700 | 0.32441900  |
|   |            |             |            | H | -0.62314100 | -0.86564500 | 1.21606300  |

INT2\_H\_S

|    |             |             |             |
|----|-------------|-------------|-------------|
| C  | 4.97762500  | -1.00695000 | 0.37102800  |
| C  | 4.99904500  | -0.78703000 | -1.01171800 |
| C  | 3.82476700  | -0.89829900 | -1.74822000 |
| C  | 2.61598300  | -1.21572100 | -1.11143300 |
| C  | 2.59011300  | -1.48563400 | 0.28024900  |
| C  | 3.79028800  | -1.36548700 | 1.00203700  |
| H  | 5.89135400  | -0.91523100 | 0.95047900  |
| H  | 5.92811100  | -0.52268600 | -1.50748200 |
| H  | 3.82218700  | -0.71632000 | -2.81868300 |
| H  | 3.78185000  | -1.57273300 | 2.06861900  |
| C  | 1.34331600  | -1.14014600 | -1.91751200 |
| O  | 1.18274900  | -1.74102300 | -2.99466600 |
| N  | 0.49324600  | -0.27942300 | -1.32409900 |
| C  | -0.75632900 | 0.13370800  | -1.75714200 |
| C  | -1.27995400 | 1.17776200  | -0.94047300 |
| C  | -1.51575700 | -0.31197300 | -2.83025400 |
| C  | -2.54715800 | 1.76117200  | -1.18734400 |
| C  | -2.78211500 | 0.26995100  | -3.07960200 |
| H  | -1.13439800 | -1.09521500 | -3.47145600 |
| C  | -0.89089300 | 2.56433900  | 0.90460700  |
| C  | -2.96071400 | 2.79682100  | -0.31177800 |
| C  | -3.29915700 | 1.27767000  | -2.29035000 |
| H  | -3.35772800 | -0.09441500 | -3.92531200 |
| C  | -2.13800300 | 3.19327500  | 0.72162600  |
| H  | -0.21705300 | 2.84690500  | 1.70486700  |
| H  | -3.92521700 | 3.27121000  | -0.46606700 |
| H  | -4.27031000 | 1.71361500  | -2.50087300 |
| H  | -2.42968700 | 3.98400200  | 1.40313000  |
| N  | -0.48299400 | 1.59464900  | 0.09561900  |
| Co | 1.13660300  | 0.64903300  | 0.18694900  |
| C  | 0.44681800  | -0.69887400 | 1.35548700  |
| C  | 1.30275800  | -1.91327800 | 0.98694800  |
| C  | 2.71668700  | 2.43000500  | 0.69919900  |
| O  | 2.03547900  | 1.72414800  | 1.53916300  |

INT2\_H\_T

|    |             |             |             |
|----|-------------|-------------|-------------|
| C  | 5.12307000  | -1.89713400 | -0.08766700 |
| C  | 5.07165200  | -1.48011100 | -1.41997200 |
| C  | 3.84198400  | -1.17210800 | -1.99637900 |
| C  | 2.66065700  | -1.24164700 | -1.24519000 |
| C  | 2.70428500  | -1.68115900 | 0.09358300  |
| C  | 3.94619400  | -2.00471300 | 0.65319100  |
| H  | 6.07520200  | -2.15000800 | 0.36968200  |
| H  | 5.98204200  | -1.40375100 | -2.00685600 |
| H  | 3.78298800  | -0.86517200 | -3.03623800 |
| H  | 3.98385000  | -2.35449700 | 1.68155700  |
| C  | 1.37447400  | -0.90566400 | -1.95023700 |
| O  | 1.15612200  | -1.41431700 | -3.06645300 |
| N  | 0.57029100  | -0.02081500 | -1.30297200 |
| C  | -0.73344400 | 0.28558500  | -1.71731200 |
| C  | -1.39089700 | 1.32857500  | -0.97780900 |
| C  | -1.45800700 | -0.33048800 | -2.73413300 |
| C  | -2.72664400 | 1.71883300  | -1.28059800 |
| C  | -2.78562100 | 0.05949900  | -3.02557200 |
| H  | -0.99353900 | -1.11313900 | -3.31415800 |
| C  | -1.24936800 | 2.90213300  | 0.74100500  |
| C  | -3.29460700 | 2.75853100  | -0.50312500 |
| C  | -3.42053900 | 1.06179400  | -2.32787000 |
| H  | -3.30675900 | -0.45367000 | -3.82854700 |
| C  | -2.56189700 | 3.35068200  | 0.50271500  |
| H  | -0.63501000 | 3.33748200  | 1.52265000  |
| H  | -4.31160300 | 3.07712500  | -0.71295400 |
| H  | -4.43828000 | 1.35884600  | -2.56038900 |
| H  | -2.97379300 | 4.14838500  | 1.11047400  |
| N  | -0.69199900 | 1.93203700  | 0.02945100  |
| Co | 1.20479200  | 1.08341300  | 0.19388000  |
| C  | 1.07457100  | -0.46841000 | 1.56520200  |
| C  | 1.44533100  | -1.78516800 | 0.93149600  |
| C  | 2.67859500  | 2.78232500  | 1.24387800  |

|              |             |             |             |              |             |             |             |
|--------------|-------------|-------------|-------------|--------------|-------------|-------------|-------------|
| O            | 1.66909700  | 2.35037900  | 1.88419900  | C            | 1.65946300  | 3.16808400  | -0.69076600 |
| O            | 2.91092400  | 2.30164300  | 0.08130100  | O            | 1.38530000  | 2.86527200  | 0.52086300  |
| C            | 3.60030100  | 3.80378300  | 1.84531600  | O            | 1.63875100  | 2.26309600  | -1.58454900 |
| H            | 4.41710500  | 3.27771900  | 2.35339500  | C            | 1.97476600  | 4.59530100  | -1.04601500 |
| H            | 4.03478900  | 4.43368600  | 1.06619800  | H            | 2.68373200  | 5.01086900  | -0.32461000 |
| H            | 3.07300600  | 4.41397800  | 2.58098700  | H            | 2.37766900  | 4.67007800  | -2.05705100 |
| H            | 1.79727600  | -0.08175600 | 2.28387000  | H            | 1.05305500  | 5.18454500  | -0.98219300 |
| H            | 1.62007900  | -2.51134900 | 1.73956300  | H            | -1.04355200 | 1.20097200  | 3.04503200  |
| H            | 0.61313200  | -2.16391600 | 0.33295200  | H            | 1.56001600  | -0.46014600 | 2.99462400  |
| H            | 0.03749200  | -0.35953700 | 1.88682900  | H            | 1.36908000  | 1.28122500  | 3.61103800  |
| INT1_CO2Et_Q |             |             |             | C            | -0.99074700 | -0.84598300 | 2.26268800  |
| C            | 4.80072200  | -1.31959500 | 0.95829400  | O            | -0.38211600 | -1.84983000 | 1.91199800  |
| C            | 4.70347600  | -2.40695600 | 0.07758000  | O            | -2.32080800 | -0.71144900 | 2.14273500  |
| C            | 3.56910900  | -2.55263300 | -0.71332500 | C            | -3.04649800 | -1.85256900 | 1.60874900  |
| C            | 2.54214200  | -1.59944000 | -0.62215400 | C            | -4.51919600 | -1.51515000 | 1.66662300  |
| C            | 2.61608700  | -0.48646600 | 0.24836700  | H            | -2.80281000 | -2.73012700 | 2.21422100  |
| C            | 3.76505600  | -0.38378100 | 1.04780400  | H            | -2.70584000 | -2.03495000 | 0.58703800  |
| H            | 5.68919000  | -1.20785200 | 1.57544000  | H            | -5.09710400 | -2.34184600 | 1.24203900  |
| H            | 5.50729100  | -3.13533100 | 0.02135500  | H            | -4.84505300 | -1.36080000 | 2.69994700  |
| H            | 3.46231500  | -3.39755000 | -1.38792600 | H            | -4.73787200 | -0.61087200 | 1.09254300  |
| H            | 3.86908500  | 0.44485200  | 1.74644700  | INT1_CO2Et_S |             |             |             |
| C            | 1.31077800  | -1.77043500 | -1.42742700 | C            | 4.99603500  | -0.51991900 | 0.53453900  |
| O            | 1.13693300  | -2.68645700 | -2.23770100 | C            | 4.95274400  | -1.75943600 | -0.11400000 |
| N            | 0.37025200  | -0.76772400 | -1.14972400 | C            | 3.73905600  | -2.24572900 | -0.59925400 |
| C            | -0.94449800 | -0.82874400 | -1.45510900 | C            | 2.57851100  | -1.48650800 | -0.42468900 |
| C            | -1.71348700 | 0.28570800  | -0.94055400 | C            | 2.61245400  | -0.24806100 | 0.23664000  |
| C            | -1.63237100 | -1.83607100 | -2.16613700 | C            | 3.82989800  | 0.23549300  | 0.71434700  |
| C            | -3.10756300 | 0.37599400  | -1.17491300 | H            | 5.94360700  | -0.13935100 | 0.90727400  |
| C            | -3.01292100 | -1.73333700 | -2.38652000 | H            | 5.86312300  | -2.33756800 | -0.24210400 |
| H            | -1.07717200 | -2.67829800 | -2.55244600 | H            | 3.67886300  | -3.19957100 | -1.11635100 |
| C            | -1.71282000 | 2.23735300  | 0.31028200  | H            | 3.88298300  | 1.19097700  | 1.22914900  |
| C            | -3.79275600 | 1.48325900  | -0.62323000 | C            | 1.25836100  | -1.90784800 | -0.95950400 |
| C            | -3.74753800 | -0.65627400 | -1.91497700 | O            | 1.06574900  | -2.98312500 | -1.55827300 |
| H            | -3.51251700 | -2.51851900 | -2.94464900 | N            | 0.32570800  | -0.94147400 | -0.72823400 |
| C            | -3.09280000 | 2.41532600  | 0.11705300  | C            | -0.97514000 | -0.92634000 | -1.21138000 |
| H            | -1.12942100 | 2.94665200  | 0.88732000  | C            | -1.67439700 | 0.28882400  | -0.93024800 |
| H            | -4.86171800 | 1.58325700  | -0.78467500 | C            | -1.65307300 | -1.92313200 | -1.90727200 |
| H            | -4.81556300 | -0.58936300 | -2.09570500 | C            | -3.01437800 | 0.49439800  | -1.35321000 |
| H            | -3.58707900 | 3.27398400  | 0.55668100  | C            | -2.98807100 | -1.71535600 | -2.32509100 |
| N            | -1.04605100 | 1.20404200  | -0.19906200 | H            | -1.15376200 | -2.85548500 | -2.12532800 |
| Co           | 1.06369300  | 0.82169600  | -0.02830400 | C            | -1.58247800 | 2.37911700  | 0.09909300  |
| C            | -0.38206800 | 0.36014700  | 2.86486600  | C            | -3.61612000 | 1.73195600  | -1.01134000 |
| C            | 0.91877400  | 0.39695500  | 3.17123700  | C            | -3.66760400 | -0.54285500 | -2.06603900 |

|              |             |             |             |            |             |             |             |
|--------------|-------------|-------------|-------------|------------|-------------|-------------|-------------|
| H            | -3.48599300 | -2.51494300 | -2.86584500 | N          | 0.26557500  | -0.93062700 | -1.01395100 |
| C            | -2.90530000 | 2.66770300  | -0.29166900 | C          | -1.08808200 | -0.89757800 | -1.35423300 |
| H            | -0.99563000 | 3.08829100  | 0.67364200  | C          | -1.73604900 | 0.32998700  | -1.01624400 |
| H            | -4.63970300 | 1.92597800  | -1.31802100 | C          | -1.84682500 | -1.89049700 | -1.96163100 |
| H            | -4.69247100 | -0.39969300 | -2.39289100 | C          | -3.11301800 | 0.54487000  | -1.28244700 |
| H            | -3.34377800 | 3.61937400  | -0.01377800 | C          | -3.22007800 | -1.67243400 | -2.23084700 |
| N            | -0.99424000 | 1.23494700  | -0.21375700 | H          | -1.38590000 | -2.83103400 | -2.22544800 |
| Co           | 0.87618200  | 0.61167900  | 0.20043700  | C          | -1.50965700 | 2.43112700  | -0.02205800 |
| C            | -0.14354900 | 0.04366600  | 2.20512700  | C          | -3.66249000 | 1.78615100  | -0.87666000 |
| C            | 1.15949700  | -0.31935000 | 2.35477700  | C          | -3.85405300 | -0.49222800 | -1.90660000 |
| C            | 1.79698800  | 2.63563800  | -0.47098600 | H          | -3.78180300 | -2.47105600 | -2.70595300 |
| O            | 1.53593800  | 2.39458900  | 0.75651600  | C          | -2.86834300 | 2.72082000  | -0.24452900 |
| O            | 1.52054400  | 1.68196900  | -1.28321300 | H          | -0.84875000 | 3.13923100  | 0.46700800  |
| C            | 2.41102500  | 3.91155600  | -0.92832200 | H          | -4.71354800 | 1.98588700  | -1.06302100 |
| H            | 3.49312500  | 3.85061400  | -0.76303200 | H          | -4.90853600 | -0.34128000 | -2.11349800 |
| H            | 2.22401400  | 4.06694600  | -1.99205500 | H          | -3.26890100 | 3.67318300  | 0.08308100  |
| H            | 2.02066800  | 4.74561100  | -0.34080700 | N          | -0.96708400 | 1.28216800  | -0.40276400 |
| H            | -0.48558500 | 1.04127400  | 2.45669100  | Co         | 0.94163600  | 0.63844800  | -0.20224500 |
| H            | 1.45221600  | -1.35881000 | 2.26519000  | C          | -0.10371000 | 0.03557300  | 2.76990400  |
| H            | 1.89051700  | 0.38247300  | 2.73636100  | C          | 1.18248700  | -0.30646000 | 2.90498500  |
| C            | -1.18957800 | -0.98752400 | 1.95799600  | C          | 2.05652900  | 2.84679100  | -0.43503000 |
| O            | -0.96890800 | -2.17503200 | 1.78066400  | O          | 1.58738900  | 2.29672000  | 0.63494200  |
| O            | -2.41126100 | -0.44527300 | 1.97060200  | O          | 1.98879100  | 2.21529400  | -1.52237600 |
| C            | -3.52102600 | -1.34699900 | 1.69349200  | C          | 2.68504100  | 4.20535800  | -0.32950500 |
| C            | -4.79396400 | -0.54218900 | 1.81664600  | H          | 3.66420500  | 4.10044300  | 0.15135000  |
| H            | -3.48203800 | -2.17145400 | 2.41051500  | H          | 2.81837800  | 4.64650100  | -1.31806200 |
| H            | -3.38199100 | -1.75099900 | 0.68735800  | H          | 2.07256100  | 4.85666100  | 0.29922000  |
| H            | -5.65042700 | -1.18626200 | 1.59455500  | H          | -0.47405500 | 1.02100800  | 3.03330600  |
| H            | -4.91210500 | -0.14873100 | 2.83100200  | H          | 1.52585500  | -1.30044800 | 2.63595900  |
| H            | -4.79868800 | 0.29400500  | 1.11233800  | H          | 1.91614400  | 0.39238600  | 3.29281900  |
|              |             |             |             | C          | -1.08680800 | -0.92716500 | 2.22708700  |
| INT1_CO2Et_T |             |             |             | O          | -0.83086300 | -2.06303100 | 1.84752800  |
| C            | 4.86111200  | -0.88931100 | 0.51760600  | O          | -2.32142400 | -0.40085400 | 2.19957000  |
| C            | 4.70838800  | -2.19374900 | 0.03290200  | C          | -3.38916100 | -1.27511900 | 1.74040500  |
| C            | 3.48835700  | -2.60211000 | -0.50585500 | C          | -4.68591300 | -0.51137300 | 1.88241600  |
| C            | 2.43071500  | -1.69106900 | -0.55490300 | H          | -3.37799900 | -2.18127200 | 2.35300300  |
| C            | 2.58235300  | -0.38374200 | -0.07131500 | H          | -3.18688200 | -1.55758000 | 0.70522800  |
| C            | 3.79854400  | 0.02366400  | 0.47032500  | H          | -5.51199100 | -1.12861000 | 1.51598700  |
| H            | 5.81409100  | -0.57953300 | 0.93831900  | H          | -4.88007300 | -0.26095500 | 2.93000300  |
| H            | 5.54195500  | -2.88822500 | 0.07900700  | H          | -4.66168700 | 0.41364700  | 1.30025400  |
| H            | 3.34469000  | -3.61127400 | -0.88238100 |            |             |             |             |
| H            | 3.92948500  | 1.02777200  | 0.86230600  | TS_CO2Et_S |             |             |             |
| C            | 1.08829900  | -2.03058600 | -1.08969200 | C          | 4.95860800  | -0.44581400 | 0.39055100  |
| O            | 0.77027200  | -3.14436100 | -1.52783400 |            |             |             |             |

|    |             |             |             |            |             |             |             |
|----|-------------|-------------|-------------|------------|-------------|-------------|-------------|
| C  | 4.91058700  | -1.63054100 | -0.35252100 | C          | -3.41907500 | -1.18486600 | 1.85625000  |
| C  | 3.67875400  | -2.16926000 | -0.72473400 | C          | -4.65130600 | -0.31537000 | 1.96179600  |
| C  | 2.49863500  | -1.52923300 | -0.34065200 | H          | -3.38292600 | -1.94432000 | 2.64217500  |
| C  | 2.54063200  | -0.35319500 | 0.43526100  | H          | -3.34879500 | -1.68357700 | 0.88571800  |
| C  | 3.77897400  | 0.18677900  | 0.79209900  | H          | -5.54455800 | -0.93562800 | 1.83866400  |
| H  | 5.91781100  | -0.01815900 | 0.66833300  | H          | -4.70303600 | 0.17314700  | 2.93986700  |
| H  | 5.83152500  | -2.12385800 | -0.64831500 | H          | -4.65496500 | 0.45401700  | 1.18474200  |
| H  | 3.61765200  | -3.06848500 | -1.33073400 |            |             |             |             |
| H  | 3.82844300  | 1.08984000  | 1.39378600  | TS_CO2Et_T |             |             |             |
| C  | 1.17381600  | -1.97760000 | -0.85053300 | C          | 4.93050000  | -0.67957800 | 0.21497200  |
| O  | 0.99181900  | -3.07327700 | -1.41465500 | C          | 4.78856800  | -1.88921800 | -0.47693100 |
| N  | 0.24931700  | -1.00053600 | -0.67331200 | C          | 3.51726400  | -2.39343200 | -0.75281000 |
| C  | -1.05065600 | -1.00248700 | -1.15851700 | C          | 2.38073800  | -1.70123600 | -0.32727400 |
| C  | -1.71409400 | 0.24655800  | -0.96825000 | C          | 2.53357400  | -0.52248000 | 0.43195700  |
| C  | -1.75488100 | -2.03409800 | -1.76966000 | C          | 3.80454000  | 0.00131700  | 0.68152600  |
| C  | -3.05294300 | 0.45489100  | -1.38752200 | H          | 5.91998600  | -0.27736700 | 0.41096600  |
| C  | -3.09005200 | -1.82482100 | -2.18852800 | H          | 5.66701900  | -2.42247500 | -0.81814700 |
| H  | -1.27915600 | -2.99227600 | -1.91979500 | H          | 3.38669900  | -3.30385800 | -1.33197400 |
| C  | -1.54978600 | 2.40524500  | -0.09791200 | H          | 3.91564700  | 0.91465600  | 1.25872600  |
| C  | -3.61677400 | 1.73079600  | -1.13340700 | C          | 1.01887600  | -2.10474600 | -0.80222800 |
| C  | -3.73801900 | -0.61930700 | -2.01133000 | O          | 0.76009600  | -3.26672100 | -1.16998700 |
| H  | -3.61434600 | -2.64961800 | -2.66209100 | N          | 0.19272100  | -1.02675800 | -0.81494100 |
| C  | -2.86990600 | 2.69732500  | -0.49514500 | C          | -1.14077000 | -1.02318300 | -1.21206700 |
| H  | -0.93814200 | 3.13627200  | 0.41915700  | C          | -1.80627200 | 0.22806700  | -0.99685400 |
| H  | -4.63926200 | 1.93010900  | -1.44004500 | C          | -1.87297800 | -2.06834200 | -1.76466700 |
| H  | -4.76292800 | -0.47684500 | -2.33824500 | C          | -3.17132300 | 0.40857400  | -1.35584300 |
| H  | -3.27848000 | 3.67879200  | -0.28354300 | C          | -3.23470700 | -1.88267200 | -2.11386000 |
| N  | -0.99605700 | 1.22570600  | -0.33596900 | H          | -1.39624700 | -3.02237000 | -1.92670100 |
| Co | 0.77829900  | 0.59227700  | 0.20152100  | C          | -1.65916800 | 2.41696200  | -0.17605500 |
| C  | 0.02818300  | 0.09645100  | 2.02104200  | C          | -3.74801600 | 1.67895900  | -1.10879500 |
| C  | 1.36239600  | -0.34225400 | 2.15559100  | C          | -3.88008000 | -0.67985600 | -1.92313300 |
| C  | 1.84151300  | 2.57968500  | -0.47741500 | H          | -3.77314200 | -2.72334600 | -2.54285700 |
| O  | 1.43605900  | 2.36867100  | 0.72219500  | C          | -2.99426100 | 2.67887600  | -0.52549000 |
| O  | 1.63709900  | 1.63736300  | -1.31137500 | H          | -1.03597600 | 3.16646800  | 0.29951900  |
| C  | 2.54285600  | 3.84134900  | -0.85132000 | H          | -4.78535200 | 1.84890000  | -1.37892400 |
| H  | 3.59341800  | 3.75335400  | -0.55027300 | H          | -4.92093000 | -0.54812500 | -2.19760800 |
| H  | 2.49753900  | 3.99961700  | -1.93001700 | H          | -3.41525500 | 3.66030400  | -0.32439200 |
| H  | 2.10458300  | 4.68847700  | -0.31863800 | N          | -1.09281400 | 1.24278500  | -0.41235000 |
| H  | -0.25461600 | 1.07603000  | 2.39279700  | Co         | 0.79017400  | 0.65218300  | 0.05580600  |
| H  | 2.05975400  | 0.30217400  | 2.67512800  | C          | 0.21016800  | 0.06432500  | 2.10659200  |
| H  | 1.53772200  | -1.40761800 | 2.24560700  | C          | 1.53648300  | -0.42068200 | 2.21019300  |
| C  | -1.05996500 | -0.90500800 | 1.96544600  | C          | 1.99277500  | 2.85947000  | -0.40995500 |
| O  | -0.90773900 | -2.11696200 | 1.89545900  | O          | 1.47683800  | 2.74576900  | 0.73916200  |
| O  | -2.26462600 | -0.31335200 | 2.00038400  | O          | 1.91304000  | 1.88644100  | -1.24561400 |

|              |             |             |             |              |             |             |             |
|--------------|-------------|-------------|-------------|--------------|-------------|-------------|-------------|
| C            | 2.74475000  | 4.09919400  | -0.80440900 | H            | -5.32077900 | 1.95304900  | -0.58592000 |
| H            | 3.80682500  | 3.95029300  | -0.57219700 | H            | -5.38594800 | -0.36878200 | -1.56390700 |
| H            | 2.65881200  | 4.27851800  | -1.87813700 | H            | -3.96232400 | 3.82451000  | 0.37103200  |
| H            | 2.38468200  | 4.96195400  | -0.24287100 | N            | -1.47460700 | 1.65978800  | -0.27776100 |
| H            | -0.02097400 | 1.08126800  | 2.40508200  | Co           | 0.52841200  | 1.20544700  | -0.16389200 |
| H            | 2.25844900  | 0.22957700  | 2.68638500  | C            | 0.87440100  | -1.68233800 | 1.80392700  |
| H            | 1.66578800  | -1.48669000 | 2.36285700  | C            | 1.95142000  | -2.51350900 | 1.19612600  |
| C            | -0.91753400 | -0.88482900 | 2.02235200  | C            | 2.52665000  | 2.40676800  | 0.57538300  |
| O            | -0.80633700 | -2.09860400 | 1.91576400  | O            | 1.94671800  | 1.56859300  | 1.34815600  |
| O            | -2.09738700 | -0.24702400 | 2.08937600  | O            | 2.01101600  | 2.65182100  | -0.56837400 |
| C            | -3.28788000 | -1.07550900 | 1.96123400  | C            | 3.81298800  | 3.05773700  | 0.98956300  |
| C            | -4.48336400 | -0.16791200 | 2.12747000  | H            | 4.63660700  | 2.39240500  | 0.70664200  |
| H            | -3.25480100 | -1.85378000 | 2.72752700  | H            | 3.94696900  | 4.01178800  | 0.47660600  |
| H            | -3.26420000 | -1.55472700 | 0.97713100  | H            | 3.84233600  | 3.19595100  | 2.07229500  |
| H            | -5.40180500 | -0.75152500 | 2.01626800  | H            | 1.13851800  | -0.78252800 | 2.34874500  |
| H            | -4.48827000 | 0.29635600  | 3.11861300  | H            | 2.61344900  | -2.89468900 | 1.98432800  |
| H            | -4.48233400 | 0.62351200  | 1.36985700  | H            | 1.50797600  | -3.37239200 | 0.68541900  |
| INT2_CO2Et_Q |             |             |             | C            | -0.52401800 | -1.99071100 | 1.63244600  |
| C            | 4.83723400  | -0.50483600 | -0.32296100 | O            | -0.96862000 | -3.00610300 | 1.09291400  |
| C            | 4.26368600  | -0.03000200 | -1.50300700 | O            | -1.32592100 | -1.02214600 | 2.14259400  |
| C            | 2.94637700  | -0.37067000 | -1.81555200 | C            | -2.75313900 | -1.27229900 | 2.08099800  |
| C            | 2.20237000  | -1.18756800 | -0.95762100 | C            | -3.44652600 | -0.05872200 | 2.65846500  |
| C            | 2.78020400  | -1.67915100 | 0.22883200  | H            | -2.96973500 | -2.17839100 | 2.65628100  |
| C            | 4.09551400  | -1.32086200 | 0.53500000  | H            | -3.03810200 | -1.45146700 | 1.04227500  |
| H            | 5.85946900  | -0.24128700 | -0.06771700 | H            | -4.53057000 | -0.20164600 | 2.61042300  |
| H            | 4.83284800  | 0.60723800  | -2.17307500 | H            | -3.16465800 | 0.09242400  | 3.70535500  |
| H            | 2.48476500  | 0.00802100  | -2.72314400 | H            | -3.19519600 | 0.84300700  | 2.09401900  |
| H            | 4.54065800  | -1.68199700 | 1.45811500  | INT2_CO2Et_S |             |             |             |
| C            | 0.76851400  | -1.51576000 | -1.29499000 | C            | -4.77183900 | -0.33438000 | 0.75412300  |
| O            | 0.47916300  | -2.65128000 | -1.71575400 | C            | -4.84255200 | 0.67141100  | -0.21739100 |
| N            | -0.07481100 | -0.48140400 | -1.06167800 | C            | -3.76597500 | 1.53223900  | -0.40261900 |
| C            | -1.45858900 | -0.54694000 | -1.24149800 | C            | -2.60631100 | 1.39231400  | 0.37241000  |
| C            | -2.18455600 | 0.62058100  | -0.81742500 | C            | -2.54046100 | 0.40892600  | 1.39143000  |
| C            | -2.19441900 | -1.60817300 | -1.76140400 | C            | -3.64028600 | -0.45125100 | 1.55559200  |
| C            | -3.60157700 | 0.68923800  | -0.93972900 | H            | -5.60706500 | -1.01360000 | 0.89536500  |
| C            | -3.60199800 | -1.53487200 | -1.87157700 | H            | -5.73095700 | 0.77306800  | -0.83315900 |
| H            | -1.67599200 | -2.50145800 | -2.07402400 | H            | -3.79687700 | 2.30321000  | -1.16651900 |
| C            | -2.10230500 | 2.75684200  | 0.12809500  | H            | -3.60250900 | -1.20470000 | 2.33750200  |
| C            | -4.24070100 | 1.87504300  | -0.50179900 | C            | -1.39593900 | 2.20167100  | -0.01147000 |
| C            | -4.30535800 | -0.41936000 | -1.47567700 | O            | -1.42293700 | 3.43552700  | -0.15661000 |
| H            | -4.13169000 | -2.39015500 | -2.28081300 | N            | -0.35456800 | 1.37689200  | -0.25055700 |
| C            | -3.49717700 | 2.90813200  | 0.02638900  | C            | 0.91617700  | 1.72396300  | -0.68663800 |
| H            | -1.48260900 | 3.54216600  | 0.55002800  | C            | 1.70490000  | 0.57846900  | -0.99035800 |

|              |             |             |             |    |             |             |             |
|--------------|-------------|-------------|-------------|----|-------------|-------------|-------------|
| C            | 1.48792100  | 2.97883400  | -0.84065800 | C  | -4.05556000 | -0.15580900 | 1.57348600  |
| C            | 3.04733400  | 0.68163500  | -1.43119800 | H  | -6.05449600 | -0.66438800 | 0.95632100  |
| C            | 2.82913800  | 3.08658200  | -1.28153600 | H  | -5.92126200 | 0.64235200  | -1.16022200 |
| H            | 0.90859800  | 3.86529200  | -0.62206200 | H  | -3.83794500 | 1.89060600  | -1.70353300 |
| C            | 1.75589200  | -1.76259500 | -1.07133100 | H  | -4.12251900 | -0.70444700 | 2.50909800  |
| C            | 3.73230700  | -0.53041500 | -1.69738400 | C  | -1.56398700 | 2.01422100  | -0.33075500 |
| C            | 3.60242400  | 1.98074000  | -1.57165700 | O  | -1.66990900 | 3.20841900  | -0.66608800 |
| H            | 3.25499900  | 4.07938900  | -1.39149000 | N  | -0.41383600 | 1.29172000  | -0.33408000 |
| C            | 3.08798100  | -1.73815500 | -1.52643600 | C  | 0.85100300  | 1.84493700  | -0.53555400 |
| H            | 1.22230500  | -2.69011000 | -0.90281100 | C  | 1.88622600  | 0.89420500  | -0.81237600 |
| H            | 4.76387700  | -0.49558700 | -2.03422200 | C  | 1.20984400  | 3.18630300  | -0.45275100 |
| H            | 4.62795600  | 2.08474800  | -1.91046700 | C  | 3.23368900  | 1.30101100  | -1.01625100 |
| H            | 3.58960500  | -2.67802600 | -1.72497300 | C  | 2.55170400  | 3.58614000  | -0.64957000 |
| N            | 1.09638400  | -0.63903100 | -0.82012400 | H  | 0.45383800  | 3.92948200  | -0.24565300 |
| Co           | -0.66007700 | -0.48578000 | -0.16668600 | C  | 2.42980400  | -1.35026100 | -1.12478800 |
| C            | -0.23168300 | -0.57200900 | 1.73861300  | C  | 4.18235100  | 0.28366800  | -1.29007000 |
| C            | -1.33902200 | 0.29977900  | 2.32777600  | C  | 3.55213600  | 2.68011400  | -0.92877600 |
| C            | -1.75096100 | -2.17088600 | -1.53039000 | H  | 2.78861000  | 4.64354900  | -0.57704500 |
| O            | -1.18495000 | -2.36173400 | -0.38641400 | C  | 3.78384500  | -1.03479300 | -1.35138800 |
| O            | -1.70493800 | -1.00464900 | -2.02546500 | H  | 2.07773500  | -2.37707100 | -1.14794500 |
| C            | -2.45864900 | -3.30343600 | -2.20549800 | H  | 5.22120400  | 0.55852000  | -1.44810100 |
| H            | -3.43596400 | -3.43732800 | -1.72770000 | H  | 4.57808600  | 2.99986700  | -1.08128300 |
| H            | -2.60856000 | -3.08649700 | -3.26421000 | H  | 4.48990800  | -1.83059200 | -1.55915000 |
| H            | -1.89245700 | -4.22965400 | -2.07978500 | N  | 1.52452100  | -0.41888300 | -0.86309500 |
| H            | -0.35838700 | -1.63792600 | 1.93583200  | Co | -0.47246600 | -0.68709800 | -0.31452200 |
| H            | -1.67977300 | -0.11806200 | 3.28119100  | C  | -0.65364600 | -0.53645600 | 1.80637200  |
| H            | -0.93945600 | 1.29676800  | 2.52563000  | C  | -1.69019800 | 0.47942700  | 2.21626200  |
| C            | 1.14413000  | -0.12834700 | 2.05995900  | C  | -1.11748500 | -2.57883100 | -1.73183900 |
| O            | 1.48301800  | 1.02000600  | 2.32429700  | O  | -0.93330800 | -2.61568000 | -0.45330200 |
| O            | 2.03085900  | -1.14319800 | 1.99974000  | O  | -0.97433900 | -1.47169900 | -2.32439400 |
| C            | 3.42838300  | -0.78975300 | 2.16933500  | C  | -1.46769200 | -3.84189800 | -2.45778400 |
| C            | 4.22948600  | -2.06958700 | 2.08259000  | H  | -2.28086900 | -4.35606700 | -1.93796100 |
| H            | 3.55062300  | -0.29654300 | 3.13791800  | H  | -1.75260500 | -3.62960600 | -3.48903800 |
| H            | 3.70270800  | -0.07993000 | 1.38359000  | H  | -0.59619400 | -4.50586200 | -2.45104600 |
| H            | 5.29287300  | -1.84253800 | 2.20812200  | H  | -0.95419800 | -1.58005500 | 1.90080600  |
| H            | 3.93215200  | -2.77054300 | 2.86891300  | H  | -2.04987500 | 0.21223100  | 3.21910300  |
| H            | 4.09287900  | -2.55251400 | 1.11066400  | H  | -1.21868100 | 1.46194500  | 2.29175600  |
| INT2_CO2Et_T |             |             |             | C  | 0.74908000  | -0.27619300 | 2.18544000  |
| C            | -5.14597800 | -0.12602100 | 0.70280900  | O  | 1.20334400  | 0.81789600  | 2.49870400  |
| C            | -5.07245000 | 0.60708400  | -0.48396400 | O  | 1.50115100  | -1.39235200 | 2.11112000  |
| C            | -3.90519800 | 1.30257600  | -0.79313600 | C  | 2.92699100  | -1.22364900 | 2.33593800  |
| C            | -2.79601700 | 1.24403300  | 0.05970300  | C  | 3.57195500  | -2.58028400 | 2.16638200  |
| C            | -2.87104300 | 0.52289100  | 1.26847500  | H  | 3.07412000  | -0.82208000 | 3.34256500  |
|              |             |             |             | H  | 3.30540100  | -0.49512000 | 1.61341100  |



|            |             |             |             |            |             |             |             |
|------------|-------------|-------------|-------------|------------|-------------|-------------|-------------|
| H          | 4.65123500  | -2.49053100 | 2.32435900  | H          | -0.89810400 | 0.94953300  | 2.62479700  |
| H          | 3.17529800  | -3.29596700 | 2.89322700  | H          | 1.27414400  | -1.20138600 | 2.14121200  |
| H          | 3.40325300  | -2.97214300 | 1.15914100  | H          | 1.50679900  | 0.54112900  | 2.76356700  |
| INT1_OEt_Q |             |             |             | O          | -1.32914600 | -0.95977600 | 1.93161300  |
| C          | 5.26595900  | -0.83855400 | -0.09443200 | C          | -2.76616900 | -0.81872500 | 2.10638700  |
| C          | 4.98374900  | -2.18174400 | -0.38206300 | C          | -3.28630000 | 0.57938500  | 2.37267300  |
| C          | 3.66532500  | -2.57840700 | -0.58004500 | H          | -3.03896700 | -1.49063200 | 2.92719100  |
| C          | 2.63930000  | -1.62431500 | -0.48204100 | H          | -3.19009600 | -1.21823600 | 1.18254100  |
| C          | 2.88937200  | -0.26503800 | -0.18274100 | H          | -4.37980900 | 0.52690200  | 2.37068000  |
| C          | 4.23207100  | 0.10088700  | -0.00695300 | H          | -2.97551200 | 0.96238800  | 3.34894200  |
| H          | 6.29722800  | -0.52991600 | 0.06223300  | H          | -2.98504500 | 1.28886000  | 1.59927700  |
| H          | 5.79075200  | -2.90509500 | -0.45611400 | INT1_OEt_S |             |             |             |
| H          | 3.42236400  | -3.61038200 | -0.81860000 | C          | 5.07261300  | -0.59428000 | 0.48929000  |
| H          | 4.48575300  | 1.13592800  | 0.22060300  | C          | 4.95602000  | -1.87024600 | -0.07419400 |
| C          | 1.23473700  | -2.03832100 | -0.70319600 | C          | 3.71366700  | -2.31471400 | -0.52729600 |
| O          | 0.88273800  | -3.21067500 | -0.87553300 | C          | 2.60222100  | -1.47522400 | -0.40803400 |
| N          | 0.36062300  | -0.94006200 | -0.68848200 | C          | 2.70578500  | -0.19150200 | 0.15918000  |
| C          | -0.93617800 | -0.97743200 | -1.05058100 | C          | 3.95403600  | 0.24248500  | 0.60764100  |
| C          | -1.60940000 | 0.30590100  | -0.95859300 | H          | 6.04172600  | -0.24828400 | 0.84092300  |
| C          | -1.68669700 | -2.08540900 | -1.50991500 | H          | 5.82993700  | -2.50979900 | -0.15852400 |
| C          | -2.97153300 | 0.44003300  | -1.32642900 | H          | 3.59514600  | -3.29939200 | -0.97220400 |
| C          | -3.03650200 | -1.93860600 | -1.84999900 | H          | 4.06897400  | 1.22894700  | 1.05013300  |
| H          | -1.20491900 | -3.04902700 | -1.58343400 | C          | 1.24819300  | -1.86858400 | -0.87914000 |
| C          | -1.44823500 | 2.55432800  | -0.42658700 | O          | 0.99164600  | -2.96761000 | -1.41167900 |
| C          | -3.55265900 | 1.72554600  | -1.23169200 | N          | 0.36222700  | -0.85640900 | -0.66108500 |
| C          | -3.68013100 | -0.71199400 | -1.76803600 | C          | -0.96052300 | -0.82001600 | -1.06950000 |
| H          | -3.58815600 | -2.80947000 | -2.18925500 | C          | -1.60640000 | 0.43578800  | -0.82195800 |
| C          | -2.78731200 | 2.78469000  | -0.78398400 | C          | -1.70694300 | -1.82758200 | -1.67649300 |
| H          | -0.82543300 | 3.35894900  | -0.04980200 | C          | -2.95489000 | 0.66883400  | -1.20787600 |
| H          | -4.59316700 | 1.86301100  | -1.50942200 | C          | -3.05316100 | -1.59565500 | -2.04043600 |
| H          | -4.72563800 | -0.61335200 | -2.04231400 | H          | -1.24808400 | -2.78638600 | -1.86895700 |
| H          | -3.20007300 | 3.78315800  | -0.69671000 | C          | -1.38994200 | 2.58807900  | 0.04627200  |
| N          | -0.87720800 | 1.35512800  | -0.51622200 | C          | -3.48990900 | 1.95509800  | -0.94195900 |
| Co         | 1.14751200  | 0.81980200  | 0.08395500  | C          | -3.67762400 | -0.38406800 | -1.82457300 |
| C          | -0.47696500 | -0.00907200 | 2.33624100  | H          | -3.60400500 | -2.40524300 | -2.51076200 |
| C          | 0.85840500  | -0.22254800 | 2.35051700  | C          | -2.71055100 | 2.91084900  | -0.32701200 |
| C          | 1.95403800  | 3.23615800  | -0.27050700 | H          | -0.75336400 | 3.30934600  | 0.54847900  |
| O          | 1.61436900  | 2.70796600  | 0.85217800  | H          | -4.51539600 | 2.17168100  | -1.22668100 |
| O          | 1.84091000  | 2.58816200  | -1.34524000 | H          | -4.70915000 | -0.21979800 | -2.11928500 |
| C          | 2.51775700  | 4.63585200  | -0.26161400 | H          | -3.09532700 | 3.90169200  | -0.11326800 |
| H          | 3.54119300  | 4.60128400  | 0.12921900  | N          | -0.86315700 | 1.39557000  | -0.19067500 |
| H          | 2.53830000  | 5.05613200  | -1.26853900 | Co         | 1.02286000  | 0.72061100  | 0.14685600  |
| H          | 1.93189300  | 5.27662600  | 0.40305800  | C          | -0.46234800 | 0.02129500  | 2.23308300  |

C 0.91448600 -0.01199200 2.16709300  
 C 1.95377000 2.71803400 -0.66190800  
 O 1.75921400 2.51457300 0.58584500  
 O 1.61243800 1.76760200 -1.44546800  
 C 2.57015100 3.97988900 -1.16718600  
 H 3.64874200 3.94120800 -0.97615100  
 H 2.40162900 4.08854300 -2.23959800  
 H 2.16126700 4.83705000 -0.62636100  
 H -0.99525500 0.94620400 2.42931400  
 H 1.39919800 -0.98108900 2.18499800  
 H 1.44435000 0.81985200 2.61929300  
 O -1.16576600 -1.06964200 2.05721200  
 C -2.63241900 -1.06636700 2.01915100  
 C -3.30385000 0.21118100 2.46721200  
 H -2.90467200 -1.90370700 2.66487300  
 H -2.89436500 -1.32236500 0.99097300  
 H -4.38391400 0.03711100 2.43091600  
 H -3.03883200 0.47236000 3.49647200  
 H -3.08451500 1.05563300 1.81086700

INT1\_OEt\_T

C 5.05235100 -0.62609100 0.38072700  
 C 4.93187400 -1.93543700 -0.10079000  
 C 3.69771900 -2.40181500 -0.55258900  
 C 2.59348900 -1.54620900 -0.51617500  
 C 2.71092400 -0.23521700 -0.03122300  
 C 3.94384200 0.23078400 0.41836100  
 H 6.01697800 -0.26846400 0.73153400  
 H 5.80091100 -2.58632600 -0.12141900  
 H 3.57833400 -3.41406500 -0.92964700  
 H 4.05320100 1.24173700 0.80019600  
 C 1.23796400 -1.94743700 -0.96576100  
 O 0.94772000 -3.07396100 -1.39701600  
 N 0.37288100 -0.88939400 -0.82557800  
 C -0.98420300 -0.89137100 -1.14260500  
 C -1.62677200 0.36811600 -0.92612200  
 C -1.75391400 -1.94218500 -1.62736900  
 C -3.00274700 0.56196900 -1.21795600  
 C -3.12917200 -1.74996700 -1.90359100  
 H -1.29694800 -2.90685400 -1.79302000  
 C -1.38119100 2.57219200 -0.19871200  
 C -3.53795800 1.85228800 -0.98177600  
 C -3.75358600 -0.53563500 -1.71453500  
 H -3.69943600 -2.59432500 -2.27935500

C -2.73143700 2.85310600 -0.48074600  
 H -0.71888700 3.32704100 0.21205600  
 H -4.58597600 2.03863600 -1.19725100  
 H -4.80738400 -0.40143100 -1.93634000  
 H -3.11777000 3.84783700 -0.29041200  
 N -0.85253500 1.37505100 -0.41475000  
 Co 1.03771100 0.72446700 -0.08399800  
 C -0.44833800 -0.00781200 2.31325200  
 C 0.89968400 -0.10237000 2.33437000  
 C 2.08142500 2.91290000 -0.67464200  
 O 1.70683200 2.49992600 0.48917700  
 O 1.94307800 2.15105500 -1.66722000  
 C 2.68780300 4.28191600 -0.79176000  
 H 3.69095100 4.26025300 -0.35136600  
 H 2.76250400 4.58306200 -1.83746600  
 H 2.09300700 5.00678200 -0.22963700  
 H -0.95106500 0.94195100 2.46282500  
 H 1.39514900 -1.06262500 2.25283200  
 H 1.48328200 0.76295300 2.62519800  
 O -1.21212300 -1.08845800 2.10857700  
 C -2.66427100 -1.00133300 2.04404700  
 C -3.28347600 0.31334000 2.47086700  
 H -3.01211900 -1.81363300 2.68819700  
 H -2.93884000 -1.24477700 1.01513600  
 H -4.37033200 0.19785400 2.40869200  
 H -3.03008700 0.56854500 3.50469600  
 H -3.00311000 1.14299300 1.81789800

TS\_OEt\_S

C 4.94577500 -0.47233900 0.30191900  
 C 4.91112700 -1.60914800 -0.51344700  
 C 3.68369600 -2.14542800 -0.90234400  
 C 2.49634700 -1.55264000 -0.46763000  
 C 2.52526000 -0.42333100 0.37738400  
 C 3.76064100 0.11093100 0.75613800  
 H 5.90009200 -0.04423500 0.59573500  
 H 5.83677600 -2.06594600 -0.85027800  
 H 3.62961800 -3.00694200 -1.56168900  
 H 3.80196600 0.97393900 1.41449900  
 C 1.17399600 -1.99387500 -0.99158400  
 O 1.00300000 -3.06730600 -1.60369900  
 N 0.24357100 -1.03596200 -0.76309400  
 C -1.04498500 -1.00876900 -1.27268700  
 C -1.68655800 0.25360000 -1.08861500

|          |             |             |             |    |             |             |             |
|----------|-------------|-------------|-------------|----|-------------|-------------|-------------|
| C        | -1.74822900 | -2.01353400 | -1.92785300 | H  | 5.53736200  | -2.23154400 | -1.00844200 |
| C        | -2.99728300 | 0.50419100  | -1.57206700 | H  | 3.28715900  | -3.31878000 | -1.02116500 |
| C        | -3.05949000 | -1.76636300 | -2.39826000 | H  | 3.79679100  | 1.30372500  | 0.71660600  |
| H        | -1.28684400 | -2.97887000 | -2.07969900 | C  | 0.93531300  | -2.24033900 | -0.37537500 |
| C        | -1.49150200 | 2.41167700  | -0.22582500 | O  | 0.77516500  | -3.47093500 | -0.51248300 |
| C        | -3.53197700 | 1.79785800  | -1.34700300 | N  | -0.00325000 | -1.26969900 | -0.47196900 |
| C        | -3.68240800 | -0.54585900 | -2.23700300 | C  | -1.35294900 | -1.45438200 | -0.71699800 |
| H        | -3.58367900 | -2.57136300 | -2.90524200 | C  | -2.12764400 | -0.23829800 | -0.69985900 |
| C        | -2.78223500 | 2.74436700  | -0.68293300 | C  | -2.02119600 | -2.64273100 | -0.99295600 |
| H        | -0.87989100 | 3.12665900  | 0.31319800  | C  | -3.52323500 | -0.25361600 | -0.97263300 |
| H        | -4.53258000 | 2.02826600  | -1.70073400 | C  | -3.40996100 | -2.64903200 | -1.25203700 |
| H        | -4.68627700 | -0.37166100 | -2.61073200 | H  | -1.46355100 | -3.56845600 | -1.01106400 |
| H        | -3.16683800 | 3.74046900  | -0.49583700 | C  | -2.13605600 | 2.07295800  | -0.39399500 |
| N        | -0.96626100 | 1.21128300  | -0.42639900 | C  | -4.20241500 | 0.99038200  | -0.94774500 |
| Co       | 0.77822700  | 0.53893600  | 0.15041300  | C  | -4.15925700 | -1.49016000 | -1.25021600 |
| C        | -0.03109000 | -0.03419800 | 1.88805300  | H  | -3.89252200 | -3.59801900 | -1.46472200 |
| C        | 1.32257700  | -0.44987100 | 1.99830100  | C  | -3.51333300 | 2.15110500  | -0.66419600 |
| C        | 1.88767800  | 2.60136900  | -0.38380900 | H  | -1.55743300 | 2.96351500  | -0.14217600 |
| O        | 1.41950100  | 2.27882300  | 0.77149300  | H  | -5.26771900 | 1.01567200  | -1.14732800 |
| O        | 1.74665100  | 1.76689000  | -1.32710200 | H  | -5.22364800 | -1.50527200 | -1.45866000 |
| C        | 2.60067300  | 3.90429900  | -0.56550800 | H  | -4.01013700 | 3.11428900  | -0.63770600 |
| H        | 3.62863600  | 3.79009300  | -0.20187400 | N  | -1.46838100 | 0.92577200  | -0.41314400 |
| H        | 2.63020300  | 4.18144400  | -1.62056100 | Co | 0.52514100  | 0.59765200  | -0.01538800 |
| H        | 2.11759000  | 4.68770900  | 0.02336200  | C  | 0.23031700  | 0.30764900  | 2.07012900  |
| H        | -0.33740800 | 0.90717100  | 2.34032400  | C  | 1.67406300  | 0.11654200  | 1.90824000  |
| H        | 1.97884100  | 0.19373200  | 2.57108800  | C  | 1.33070200  | 2.80544500  | -0.88599800 |
| H        | 1.49269800  | -1.51534800 | 2.10781300  | O  | 0.94235300  | 2.76393900  | 0.32161900  |
| O        | -1.01173400 | -0.99889300 | 1.81833400  | O  | 1.31582700  | 1.73616900  | -1.59005200 |
| C        | -2.15402900 | -0.77673900 | 2.67517200  | C  | 1.85333300  | 4.08244700  | -1.48323100 |
| C        | -3.13127100 | 0.24616100  | 2.12523300  | H  | 2.94139100  | 4.11053900  | -1.35075700 |
| H        | -1.79940500 | -0.49146600 | 3.67318900  | H  | 1.64085300  | 4.12289000  | -2.55789700 |
| H        | -2.62702200 | -1.75905100 | 2.75182300  | H  | 1.42264200  | 4.94979500  | -0.97888900 |
| H        | -3.98506300 | 0.32836800  | 2.80670800  | H  | -0.20269300 | 1.28560300  | 2.24263000  |
| H        | -2.67596700 | 1.23616400  | 2.03704100  | H  | 2.23792800  | 1.01506100  | 2.14551800  |
| H        | -3.50311700 | -0.05950700 | 1.14431400  | H  | 2.01796400  | -0.78372400 | 2.40851300  |
|          |             |             |             | O  | -0.49903100 | -0.79597100 | 2.42224400  |
| TS_OEt_T |             |             |             | C  | -1.71279400 | -0.57848000 | 3.18546700  |
| C        | 4.79491000  | -0.37842100 | -0.18447300 | H  | -2.37831100 | -1.41031400 | 2.90803900  |
| C        | 4.67086700  | -1.69750000 | -0.63472000 | H  | -1.44943800 | -0.68280600 | 4.24883100  |
| C        | 3.42006900  | -2.31360400 | -0.62646800 | C  | -2.39984600 | 0.76178200  | 2.92439000  |
| C        | 2.29157700  | -1.63862000 | -0.16017100 | H  | -3.30847200 | 0.77771100  | 3.53541700  |
| C        | 2.42776900  | -0.32547800 | 0.36071900  | H  | -1.76711300 | 1.62369700  | 3.22555800  |
| C        | 3.68431800  | 0.29607100  | 0.32752900  | H  | -2.68880000 | 0.86994300  | 1.86538100  |
| H        | 5.76054100  | 0.11741700  | -0.21345400 |    |             |             |             |

INT2\_OEt\_Q

|    |             |             |             |
|----|-------------|-------------|-------------|
| C  | 4.74943600  | 0.02516000  | -1.05754400 |
| C  | 4.79097600  | 0.72801800  | 0.14884600  |
| C  | 3.66130000  | 1.41885500  | 0.58197400  |
| C  | 2.47672000  | 1.38946000  | -0.16395300 |
| C  | 2.43649200  | 0.70885100  | -1.39677400 |
| C  | 3.58509300  | 0.03217900  | -1.82595400 |
| H  | 5.62596900  | -0.51234400 | -1.40754700 |
| H  | 5.69828700  | 0.74053800  | 0.74548800  |
| H  | 3.68083000  | 1.97313400  | 1.51600500  |
| H  | 3.56453000  | -0.48484400 | -2.78203600 |
| C  | 1.27609800  | 2.10974700  | 0.39548300  |
| O  | 1.36101000  | 3.33055600  | 0.63782400  |
| N  | 0.20984700  | 1.30531800  | 0.62242100  |
| C  | -1.03839200 | 1.78216100  | 1.02905500  |
| C  | -1.96200200 | 0.77464000  | 1.47631400  |
| C  | -1.49013400 | 3.09883900  | 1.00507500  |
| C  | -3.28303600 | 1.11456600  | 1.88636400  |
| C  | -2.80629600 | 3.42760000  | 1.40328600  |
| H  | -0.82062900 | 3.88087100  | 0.67807700  |
| C  | -2.34131300 | -1.48984400 | 1.90874800  |
| C  | -4.12318700 | 0.06032900  | 2.32304500  |
| C  | -3.69489600 | 2.47075300  | 1.84038600  |
| H  | -3.11258000 | 4.46894400  | 1.36086600  |
| C  | -3.65544300 | -1.23587700 | 2.34221500  |
| H  | -1.93889400 | -2.49795100 | 1.89259600  |
| H  | -5.13567000 | 0.29139200  | 2.64151000  |
| H  | -4.70189400 | 2.73074300  | 2.15100700  |
| H  | -4.27767100 | -2.05907800 | 2.67455600  |
| N  | -1.53246400 | -0.52423700 | 1.49348800  |
| Co | 0.30927400  | -0.72254500 | 0.57009300  |
| C  | 0.35654000  | -0.53471600 | -2.06591600 |
| C  | 1.19443300  | 0.69544800  | -2.26430500 |
| C  | 1.67996900  | -2.70675800 | 1.15655700  |
| O  | 0.55035300  | -2.88137400 | 0.59251400  |
| O  | 2.06780000  | -1.51762800 | 1.41394000  |
| C  | 2.55967900  | -3.88031100 | 1.48380300  |
| H  | 3.07413900  | -4.19619700 | 0.56884900  |
| H  | 3.30830500  | -3.61032200 | 2.23040100  |
| H  | 1.95571500  | -4.71993900 | 1.83598700  |
| H  | 0.82109600  | -1.51943200 | -2.16351600 |
| H  | 1.50001700  | 0.75691900  | -3.32149700 |
| H  | 0.57333300  | 1.57461400  | -2.06843900 |
| O  | -0.90244800 | -0.41605400 | -2.57954800 |

|   |             |             |             |
|---|-------------|-------------|-------------|
| C | -1.64187400 | -1.63603000 | -2.79898700 |
| C | -2.28533500 | -2.15556100 | -1.52659000 |
| H | -0.96934700 | -2.38143800 | -3.24045300 |
| H | -2.39896600 | -1.37094100 | -3.54148300 |
| H | -2.91082500 | -3.02320500 | -1.76285300 |
| H | -1.52963900 | -2.46683000 | -0.80240200 |
| H | -2.91849300 | -1.38813200 | -1.07098200 |

INT2\_OEt\_S

|    |             |             |             |
|----|-------------|-------------|-------------|
| C  | 4.60177200  | -0.44444500 | -0.65824000 |
| C  | 4.73295100  | 0.61661900  | 0.24589700  |
| C  | 3.69970000  | 1.53635500  | 0.39205300  |
| C  | 2.52170700  | 1.40214600  | -0.35516100 |
| C  | 2.39771600  | 0.36340000  | -1.31282400 |
| C  | 3.45555000  | -0.55521300 | -1.43877100 |
| H  | 5.40292000  | -1.16895600 | -0.76751600 |
| H  | 5.63563900  | 0.71599000  | 0.84092700  |
| H  | 3.77782200  | 2.35061400  | 1.10588100  |
| H  | 3.37240000  | -1.35050900 | -2.17426900 |
| C  | 1.34431600  | 2.27241600  | 0.00344000  |
| O  | 1.41739300  | 3.50910700  | 0.11753100  |
| N  | 0.28546100  | 1.47998200  | 0.25922500  |
| C  | -0.96475400 | 1.84832200  | 0.72837300  |
| C  | -1.73581700 | 0.71819100  | 1.12960800  |
| C  | -1.52559500 | 3.11158200  | 0.85670600  |
| C  | -3.04586900 | 0.85163800  | 1.65338800  |
| C  | -2.83684600 | 3.24650300  | 1.37306300  |
| H  | -0.95755600 | 3.98525500  | 0.56691200  |
| C  | -1.77648700 | -1.60994900 | 1.35785500  |
| C  | -3.71217200 | -0.34091100 | 2.03430700  |
| C  | -3.58959000 | 2.15828400  | 1.76620800  |
| H  | -3.25464600 | 4.24488200  | 1.46228200  |
| C  | -3.07800600 | -1.55747900 | 1.89436200  |
| H  | -1.25033200 | -2.54678100 | 1.21998800  |
| H  | -4.71828700 | -0.28235500 | 2.43868800  |
| H  | -4.59056900 | 2.28269700  | 2.16636800  |
| H  | -3.56329600 | -2.48297400 | 2.18199900  |
| N  | -1.13645700 | -0.50792200 | 0.98619800  |
| Co | 0.58163000  | -0.38862100 | 0.21882100  |
| C  | 0.04449300  | -0.51538100 | -1.62282500 |
| C  | 1.19322300  | 0.27108300  | -2.24823400 |
| C  | 1.72229100  | -2.17204600 | 1.50356200  |
| O  | 1.05624400  | -2.26435500 | 0.39956700  |
| O  | 1.80388800  | -1.05922100 | 2.08714300  |

|            |             |             |             |           |             |             |             |
|------------|-------------|-------------|-------------|-----------|-------------|-------------|-------------|
| C          | 2.40517600  | -3.40300600 | 2.02859600  | H         | -4.29669100 | -2.12024200 | 2.15637100  |
| H          | 3.29164300  | -3.59990500 | 1.41488400  | N         | -1.52719000 | -0.52861100 | 1.11527800  |
| H          | 2.71532200  | -3.26025300 | 3.06486500  | Co        | 0.40163200  | -0.66312100 | 0.32998600  |
| H          | 1.74268700  | -4.26870500 | 1.94543500  | C         | 0.20157800  | -0.50225500 | -1.78064600 |
| H          | 0.11377500  | -1.59172400 | -1.80391200 | C         | 1.14755900  | 0.56606200  | -2.28640500 |
| H          | 1.50865000  | -0.19789700 | -3.18700200 | C         | 1.55112500  | -2.51888000 | 1.61166700  |
| H          | 0.83123500  | 1.27604700  | -2.47995500 | O         | 1.30602700  | -2.44058300 | 0.34383000  |
| O          | -1.16315500 | 0.01813400  | -2.05984200 | O         | 1.20899900  | -1.58029500 | 2.37509600  |
| C          | -2.37408500 | -0.75174700 | -1.93045500 | C         | 2.24722500  | -3.75203800 | 2.11987000  |
| C          | -2.24218600 | -2.23954700 | -2.20805100 | H         | 3.22096900  | -3.84719400 | 1.62845800  |
| H          | -3.05407100 | -0.29347800 | -2.65433500 | H         | 2.38335200  | -3.70673500 | 3.20108400  |
| H          | -2.79903100 | -0.58850100 | -0.93567700 | H         | 1.65926900  | -4.63712600 | 1.85651400  |
| H          | -3.24719400 | -2.67400000 | -2.22854700 | H         | 0.52452600  | -1.53499900 | -1.94017400 |
| H          | -1.77100100 | -2.42467700 | -3.17909500 | H         | 1.36940400  | 0.35050600  | -3.34028100 |
| H          | -1.67279100 | -2.76064500 | -1.43342600 | H         | 0.62287500  | 1.52484100  | -2.25484300 |
| INT2_OEt_T |             |             |             | O         | -1.07786600 | -0.22667100 | -2.14623700 |
| C          | 4.78868800  | 0.03734100  | -1.27433200 | C         | -2.12820100 | -1.22639600 | -2.05575800 |
| C          | 4.87614400  | 0.79055000  | -0.10117500 | C         | -1.67486200 | -2.66738900 | -1.94741700 |
| C          | 3.75328000  | 1.47031100  | 0.36712300  | H         | -2.72060300 | -1.07341500 | -2.96202700 |
| C          | 2.53118800  | 1.37975600  | -0.31056400 | H         | -2.74641700 | -0.94792800 | -1.19796800 |
| C          | 2.44236400  | 0.64061300  | -1.50821200 | H         | -2.57054600 | -3.29660100 | -1.93233300 |
| C          | 3.58299400  | -0.02320500 | -1.97416900 | H         | -1.06443400 | -2.96883200 | -2.80443200 |
| H          | 5.65993900  | -0.49026300 | -1.65118100 | H         | -1.11501400 | -2.86038100 | -1.02843100 |
| H          | 5.81443600  | 0.85215200  | 0.44198800  | INT1_Ph_Q |             |             |             |
| H          | 3.80899000  | 2.06932200  | 1.27126300  | C         | 4.86331700  | -1.67855300 | -0.22128900 |
| H          | 3.52280300  | -0.58386100 | -2.90326300 | C         | 4.34040500  | -2.90267800 | -0.66576200 |
| C          | 1.34517100  | 2.10838000  | 0.26965300  | C         | 2.97527100  | -3.02057900 | -0.90055800 |
| O          | 1.45692100  | 3.31496100  | 0.56617100  | C         | 2.14295800  | -1.90959700 | -0.68346100 |
| N          | 0.25739700  | 1.32396800  | 0.45979600  | C         | 2.63730700  | -0.66354100 | -0.22761800 |
| C          | -0.97239700 | 1.79417500  | 0.92012700  | C         | 4.02255500  | -0.58028800 | -0.01504800 |
| C          | -1.92329300 | 0.77015000  | 1.25552700  | H         | 5.93131800  | -1.58910000 | -0.03531300 |
| C          | -1.37825200 | 3.11875600  | 1.05815900  | H         | 5.00035300  | -3.74964500 | -0.82962500 |
| C          | -3.22755600 | 1.09697100  | 1.72374600  | H         | 2.54777700  | -3.95431000 | -1.25561800 |
| C          | -2.67858800 | 3.43570600  | 1.51418400  | H         | 4.45982500  | 0.35412800  | 0.33520400  |
| H          | -0.68406300 | 3.91128800  | 0.82075800  | C         | 0.69099200  | -2.02369400 | -0.93663000 |
| C          | -2.35224600 | -1.51471700 | 1.43576300  | O         | 0.11271600  | -3.07846900 | -1.21807600 |
| C          | -4.09206500 | 0.02062600  | 2.04673100  | N         | 0.04461200  | -0.78583800 | -0.78677800 |
| C          | -3.59388700 | 2.46128700  | 1.84659400  | C         | -1.19388400 | -0.50107300 | -1.21356600 |
| H          | -2.95049100 | 4.48341000  | 1.60550900  | C         | -1.64742300 | 0.83302300  | -0.85891700 |
| C          | -3.65726400 | -1.27975300 | 1.91119300  | C         | -2.07423500 | -1.32917400 | -1.95344700 |
| H          | -1.97539700 | -2.52485200 | 1.30624800  | C         | -2.95074400 | 1.26751400  | -1.20246700 |
| H          | -5.09442100 | 0.23807100  | 2.40430400  | C         | -3.34986300 | -0.87536500 | -2.29941200 |
| H          | -4.58729700 | 2.71518600  | 2.20285200  | H         | -1.75101800 | -2.32241500 | -2.22890500 |

|           |             |             |             |    |             |             |             |
|-----------|-------------|-------------|-------------|----|-------------|-------------|-------------|
| C         | -1.17203500 | 2.82852200  | 0.21161400  | H  | 2.95651500  | -3.44926500 | -1.57108300 |
| C         | -3.34372800 | 2.55629000  | -0.77721900 | H  | 4.08144200  | 0.59166300  | 1.11804300  |
| C         | -3.79719500 | 0.38732600  | -1.93325800 | C  | 0.83935300  | -1.73274500 | -1.19516500 |
| H         | -4.00662200 | -1.53334500 | -2.85893900 | O  | 0.41434200  | -2.69779000 | -1.86046300 |
| C         | -2.45409700 | 3.33357900  | -0.06019300 | N  | 0.12246100  | -0.63298000 | -0.83206700 |
| H         | -0.44323700 | 3.41373900  | 0.76298500  | C  | -1.17951200 | -0.34046200 | -1.20540100 |
| H         | -4.33980000 | 2.91727000  | -1.01447200 | C  | -1.65193300 | 0.91361400  | -0.70251200 |
| H         | -4.79604600 | 0.71926200  | -2.19820700 | C  | -2.05079500 | -1.10531000 | -1.97512100 |
| H         | -2.72333400 | 4.32411200  | 0.28823500  | C  | -2.96346400 | 1.38274600  | -0.98371300 |
| N         | -0.77886200 | 1.61882100  | -0.18267300 | C  | -3.35605100 | -0.63611700 | -2.24830500 |
| Co        | 1.15898600  | 0.70490200  | 0.19049800  | H  | -1.72561800 | -2.06329200 | -2.35277400 |
| C         | -0.26735000 | -0.04168500 | 2.49357000  | C  | -1.16503100 | 2.78347000  | 0.60036500  |
| C         | 1.02867600  | -0.40980800 | 2.57103800  | C  | -3.33737200 | 2.62841700  | -0.42109800 |
| C         | 2.26934900  | 3.02717900  | -0.06478900 | C  | -3.81816700 | 0.57459400  | -1.77614400 |
| O         | 1.93262100  | 2.42339300  | 1.02299900  | H  | -4.01023200 | -1.26161800 | -2.84890800 |
| O         | 2.05884000  | 2.50034900  | -1.18760800 | C  | -2.44389300 | 3.32563800  | 0.36376900  |
| C         | 2.91282000  | 4.38675800  | 0.05754300  | H  | -0.43912600 | 3.29903700  | 1.22081800  |
| H         | 3.79507500  | 4.31926000  | 0.70191400  | H  | -4.33332500 | 3.01816700  | -0.61059700 |
| H         | 3.19863000  | 4.77735400  | -0.92020800 | H  | -4.82405500 | 0.91894900  | -1.99408900 |
| H         | 2.21069300  | 5.07754300  | 0.53649900  | H  | -2.70648800 | 4.27855500  | 0.80924900  |
| H         | -0.52764800 | 0.98225100  | 2.75637100  | N  | -0.78844700 | 1.62209900  | 0.08565300  |
| H         | 1.36507600  | -1.41682400 | 2.34889800  | Co | 0.98041200  | 0.65550500  | 0.25167300  |
| H         | 1.77781400  | 0.28289400  | 2.94073300  | C  | -0.28524100 | -0.17439500 | 2.23514000  |
| C         | -1.39794000 | -0.88223300 | 2.07769300  | C  | 1.04491400  | -0.47704600 | 2.27370500  |
| C         | -2.65947800 | -0.28550700 | 1.91959900  | C  | 2.18096100  | 2.60080900  | -0.19548900 |
| C         | -1.26027700 | -2.24985400 | 1.77903100  | O  | 1.95194100  | 2.21867300  | 1.00182300  |
| C         | -3.74952600 | -1.02528100 | 1.46157600  | O  | 1.71248400  | 1.83956300  | -1.11436500 |
| H         | -2.77490100 | 0.77276500  | 2.13765000  | C  | 2.96737300  | 3.82641600  | -0.50940400 |
| C         | -2.34543500 | -2.98627100 | 1.31566300  | H  | 4.03294300  | 3.58671200  | -0.41485000 |
| H         | -0.29668000 | -2.73577000 | 1.89047300  | H  | 2.76883800  | 4.15924800  | -1.52940100 |
| C         | -3.59475000 | -2.37709900 | 1.15280800  | H  | 2.72998800  | 4.61622900  | 0.20703000  |
| H         | -4.71334800 | -0.54215800 | 1.33216200  | H  | -0.59529900 | 0.80619800  | 2.58597400  |
| H         | -2.21650300 | -4.03667100 | 1.07212100  | H  | 1.40602200  | -1.47909600 | 2.08190600  |
| H         | -4.43785700 | -2.95322000 | 0.78321500  | H  | 1.74603000  | 0.21231600  | 2.73007100  |
| INT1_Ph_S |             |             |             | C  | -1.37310500 | -1.07508400 | 1.84768700  |
| C         | 4.81630300  | -1.23518300 | 0.23960700  | C  | -2.68545100 | -0.57416900 | 1.83811000  |
| C         | 4.51424200  | -2.37958600 | -0.50749100 | C  | -1.14800700 | -2.40062100 | 1.43351800  |
| C         | 3.21691800  | -2.57364200 | -0.98221100 | C  | -3.74838300 | -1.37054600 | 1.41645500  |
| C         | 2.23574300  | -1.61912400 | -0.69971200 | H  | -2.86091100 | 0.45356300  | 2.14350700  |
| C         | 2.52609900  | -0.47335000 | 0.06178000  | C  | -2.20770800 | -3.19151100 | 1.00473600  |
| C         | 3.82718700  | -0.28456800 | 0.52729800  | H  | -0.14221000 | -2.80597200 | 1.42555800  |
| H         | 5.82900300  | -1.08290900 | 0.60488300  | C  | -3.51020000 | -2.67894300 | 0.99280600  |
| H         | 5.28883300  | -3.11111300 | -0.71848500 | H  | -4.75583200 | -0.96646400 | 1.40415400  |
|           |             |             |             | H  | -2.02076600 | -4.20833600 | 0.67315500  |

H -4.33381700 -3.29841100 0.65035200

INT1\_Ph\_T

C 4.58563400 -1.64826100 0.16137700

C 4.13454600 -2.83810100 -0.42242900

C 2.83204300 -2.92661800 -0.91364900

C 1.99425200 -1.81323800 -0.81599300

C 2.44304400 -0.62150400 -0.22927900

C 3.74205600 -0.53346800 0.26437200

H 5.60120700 -1.58748500 0.54362700

H 4.80060600 -3.69314200 -0.48969000

H 2.45712800 -3.84161900 -1.36427200

H 4.10233900 0.37594700 0.73571000

C 0.58585500 -1.80951600 -1.28327500

O 0.01391300 -2.78549300 -1.78964200

N 0.02365600 -0.57716600 -1.04922300

C -1.30753500 -0.23343200 -1.28995500

C -1.68825900 1.02498000 -0.73250800

C -2.26556400 -0.95720600 -1.98703800

C -3.01356200 1.51967300 -0.84832000

C -3.58249800 -0.45438500 -2.11668800

H -2.00556100 -1.91272400 -2.41760300

C -1.01102100 2.87647800 0.51722600

C -3.29775100 2.75515200 -0.21769100

C -3.96647900 0.74707100 -1.56249500

H -4.30690800 -1.04963000 -2.66445400

C -2.30505400 3.42677800 0.46692100

H -0.19983500 3.37752500 1.03523600

H -4.30339000 3.16109300 -0.27663700

H -4.98298600 1.11454200 -1.65935800

H -2.50043000 4.37077000 0.96265100

N -0.71707200 1.72177200 -0.06608100

Co 1.04692700 0.71552800 -0.12559100

C -0.23316000 -0.26934200 2.64473000

C 1.05266000 -0.61862700 2.81149700

C 2.54281100 2.67741600 -0.16254800

O 2.06300000 2.08232900 0.87580800

O 2.25916900 2.21786000 -1.30290100

C 3.43140800 3.87051500 0.02827500

H 4.39547200 3.52996700 0.42222400

H 3.59306200 4.38803100 -0.91805100

H 2.99286500 4.55042200 0.76347000

H -0.54395100 0.72586600 2.95962400

H 1.43836000 -1.59346900 2.53030400

H 1.76264000 0.07529700 3.25045500

C -1.30125800 -1.09221000 2.06024100

C -2.60410900 -0.56985400 2.00421500

C -1.06958900 -2.37069400 1.52112500

C -3.64891000 -1.30378300 1.44279800

H -2.79117700 0.42491000 2.40020000

C -2.10825600 -3.09753500 0.94793200

H -0.06894500 -2.79029000 1.53131200

C -3.40410500 -2.57052500 0.91156400

H -4.64808700 -0.88021700 1.40675700

H -1.90601400 -4.07431000 0.51849700

H -4.21138400 -3.13913300 0.45952800

TS\_Ph\_S

C 4.82102600 -1.03642400 0.15346600

C 4.59126200 -2.06777000 -0.76382300

C 3.28674400 -2.37063400 -1.15461500

C 2.21587100 -1.65315300 -0.61841600

C 2.43712400 -0.63656100 0.33663100

C 3.75081500 -0.33186700 0.70905800

H 5.83702000 -0.78727500 0.44651300

H 5.42706300 -2.62172900 -1.18037400

H 3.08596500 -3.14048300 -1.89408600

H 3.94082000 0.44400400 1.44513600

C 0.83263300 -1.83007100 -1.14341000

O 0.47742200 -2.81434000 -1.82191700

N 0.07863700 -0.74928200 -0.83157700

C -1.22003300 -0.50240400 -1.24702500

C -1.68667700 0.78987900 -0.85998900

C -2.08907400 -1.33389200 -1.94364900

C -2.99491800 1.23880700 -1.17621100

C -3.39422800 -0.88643700 -2.25582300

H -1.76442100 -2.32198700 -2.23605700

C -1.18110200 2.76200000 0.27758800

C -3.35897400 2.53170800 -0.72473700

C -3.85143500 0.36370800 -1.89288500

H -4.05203800 -1.55994400 -2.79745900

C -2.45685600 3.28802500 -0.00707900

H -0.45369500 3.31975600 0.85687100

H -4.35270400 2.91125500 -0.94373000

H -4.85640000 0.68974100 -2.14104300

H -2.71130300 4.27791900 0.35427900

N -0.81290600 1.55915100 -0.14044800

Co 0.84496000 0.59972000 0.25443200

|         |             |             |             |           |             |             |             |
|---------|-------------|-------------|-------------|-----------|-------------|-------------|-------------|
| C       | 0.01769200  | -0.09533200 | 1.97392800  | C         | -1.35181300 | 2.77918200  | 0.08320500  |
| C       | 1.32216700  | -0.66657700 | 2.00208500  | C         | -3.55936700 | 2.38651200  | -0.76984100 |
| C       | 2.21509100  | 2.51357500  | -0.09751900 | C         | -4.02379800 | 0.15521100  | -1.79861600 |
| O       | 1.74788300  | 2.15595300  | 1.04523500  | H         | -4.20535500 | -1.81361400 | -2.60309200 |
| O       | 1.91045400  | 1.78837000  | -1.09571500 | C         | -2.66394200 | 3.23654100  | -0.14533200 |
| C       | 3.10446100  | 3.70849500  | -0.21757700 | H         | -0.61020900 | 3.39483800  | 0.58130900  |
| H       | 4.11449200  | 3.42068800  | 0.09704100  | H         | -4.58374500 | 2.70167900  | -0.94164300 |
| H       | 3.14289200  | 4.05647000  | -1.25104200 | H         | -5.05386700 | 0.43535300  | -1.99149000 |
| H       | 2.75743500  | 4.50637800  | 0.44342100  | H         | -2.95449800 | 4.22257100  | 0.18724500  |
| H       | -0.10345500 | 0.85556800  | 2.48797900  | N         | -0.95937400 | 1.57892400  | -0.30902800 |
| H       | 2.06157600  | -0.15145000 | 2.60347500  | Co        | 0.85241400  | 0.66714100  | 0.07689800  |
| H       | 1.41204600  | -1.74620000 | 2.01786600  | C         | 0.19891600  | 0.01578400  | 2.16469800  |
| C       | -1.22370900 | -0.88163600 | 1.84955500  | C         | 1.52002400  | -0.55562300 | 2.09058600  |
| C       | -2.45499800 | -0.22401400 | 2.00842800  | C         | 2.35511700  | 2.78729100  | -0.11605700 |
| C       | -1.23602000 | -2.25130900 | 1.53281700  | O         | 1.74760800  | 2.52875000  | 0.98156800  |
| C       | -3.66016600 | -0.90191200 | 1.83156800  | O         | 2.25603700  | 1.99601300  | -1.12228700 |
| H       | -2.46050200 | 0.83559200  | 2.24889400  | C         | 3.22399200  | 4.00363000  | -0.21131100 |
| C       | -2.43919700 | -2.92906900 | 1.35648500  | H         | 4.20656600  | 3.77501800  | 0.25767600  |
| H       | -0.30325800 | -2.78808800 | 1.39727800  | H         | 3.39803600  | 4.27782000  | -1.26495600 |
| C       | -3.65766200 | -2.25733000 | 1.49808600  | H         | 2.76654100  | 4.83668300  | 0.35085900  |
| H       | -4.59953500 | -0.36867600 | 1.94549700  | H         | 0.10815500  | 1.04600700  | 2.49746000  |
| H       | -2.42693600 | -3.98477400 | 1.10117000  | H         | 2.29771700  | 0.04206900  | 2.55260300  |
| H       | -4.59419000 | -2.78696900 | 1.35044300  | H         | 1.60678500  | -1.62232300 | 2.26734200  |
| TS_Ph_T |             |             |             | C         | -1.03960400 | -0.73512800 | 2.01417600  |
| C       | 4.80377000  | -1.23715900 | -0.04712200 | C         | -2.27468500 | -0.06851200 | 2.13704800  |
| C       | 4.46717800  | -2.32957800 | -0.84991100 | C         | -1.04409900 | -2.11702900 | 1.72650900  |
| C       | 3.13021000  | -2.61321200 | -1.12618200 | C         | -3.47580700 | -0.75508700 | 1.98232800  |
| C       | 2.10928100  | -1.83272100 | -0.56815000 | H         | -2.28117900 | 1.00201400  | 2.34491100  |
| C       | 2.45983800  | -0.80224500 | 0.32912400  | C         | -2.24093400 | -2.79874200 | 1.56697200  |
| C       | 3.79532000  | -0.47592500 | 0.56016900  | H         | -0.10677800 | -2.65218100 | 1.60940400  |
| H       | 5.84607800  | -0.98997100 | 0.13593000  | C         | -3.46349800 | -2.12170400 | 1.69578700  |
| H       | 5.25434300  | -2.94204600 | -1.29028100 | H         | -4.41937500 | -0.23068200 | 2.07344700  |
| H       | 2.85865700  | -3.41243400 | -1.80290500 | H         | -2.23211500 | -3.86306900 | 1.33574200  |
| H       | 4.05819200  | 0.33935200  | 1.22952700  | H         | -4.40017600 | -2.65944000 | 1.57097600  |
| C       | 0.69565600  | -1.98702900 | -1.06279100 | INT2_Ph_Q |             |             |             |
| O       | 0.27813100  | -3.06045200 | -1.54100600 | C         | 4.83262000  | -0.80186700 | -0.19620300 |
| N       | 0.02341200  | -0.81625100 | -0.96289200 | C         | 4.27517000  | -1.15730500 | -1.42587500 |
| C       | -1.31079000 | -0.59328900 | -1.29238500 | C         | 2.95663200  | -1.60899500 | -1.47893800 |
| C       | -1.80914700 | 0.71401900  | -0.93111100 | C         | 2.19326400  | -1.71675900 | -0.31021600 |
| C       | -2.20528300 | -1.47427600 | -1.88940900 | C         | 2.75364700  | -1.37592400 | 0.93577000  |
| C       | -3.15312500 | 1.09362500  | -1.18171400 | C         | 4.07465000  | -0.91352600 | 0.97051200  |
| C       | -3.54499900 | -1.08965400 | -2.13744700 | H         | 5.85693000  | -0.44434900 | -0.14334800 |
| H       | -1.86187100 | -2.46292600 | -2.15842000 | H         | 4.85975300  | -1.07903300 | -2.33761700 |



|    |             |             |             |           |             |             |             |
|----|-------------|-------------|-------------|-----------|-------------|-------------|-------------|
| H  | 2.50622200  | -1.87049000 | -2.43256200 | H         | -4.05269300 | 0.82593100  | 2.36323100  |
| H  | 4.51072100  | -0.63906800 | 1.92774700  |           |             |             |             |
| C  | 0.75124400  | -2.15610400 | -0.40990700 | INT2_Ph_S |             |             |             |
| O  | 0.42679800  | -3.31260400 | -0.07216700 | C         | 4.72366500  | -0.48196000 | 0.79102500  |
| N  | -0.06222700 | -1.17067100 | -0.85313000 | C         | 4.71452500  | -1.10812500 | -0.46171800 |
| C  | -1.44583700 | -1.31968200 | -0.98683600 | C         | 3.55080200  | -1.71021400 | -0.92790400 |
| C  | -2.19345400 | -0.09302900 | -1.03360800 | C         | 2.38262600  | -1.68398000 | -0.15351500 |
| C  | -2.15773900 | -2.51053900 | -1.07110800 | C         | 2.39186700  | -1.09924800 | 1.13940900  |
| C  | -3.61252500 | -0.09983400 | -1.14644400 | C         | 3.58110300  | -0.49384400 | 1.58468000  |
| C  | -3.56744200 | -2.51077500 | -1.19111000 | H         | 5.62877600  | -0.00409700 | 1.15329500  |
| H  | -1.62412900 | -3.44855400 | -1.02628100 | H         | 5.61151800  | -1.11536700 | -1.07340700 |
| C  | -2.15106800 | 2.23949700  | -0.91374100 | H         | 3.52229900  | -2.18122700 | -1.90577400 |
| C  | -4.27492200 | 1.15218500  | -1.14545700 | H         | 3.60115800  | -0.04624500 | 2.57445200  |
| C  | -4.29387100 | -1.34176300 | -1.22611200 | C         | 1.09272300  | -2.15151300 | -0.78111400 |
| H  | -4.08024500 | -3.46644800 | -1.25039100 | O         | 0.95000500  | -3.27029900 | -1.30477100 |
| C  | -3.55100400 | 2.31877500  | -1.02572400 | N         | 0.20518600  | -1.13990300 | -0.74143100 |
| H  | -1.54294600 | 3.13318200  | -0.81103100 | C         | -1.09069600 | -1.10607000 | -1.23046400 |
| H  | -5.35754100 | 1.17604800  | -1.23065200 | C         | -1.66041900 | 0.19509800  | -1.12176800 |
| H  | -5.37614400 | -1.34885300 | -1.30885900 | C         | -1.86842000 | -2.13120700 | -1.74890800 |
| H  | -4.03479200 | 3.28874600  | -1.01320900 | C         | -2.99609200 | 0.46344000  | -1.50707600 |
| N  | -1.50304000 | 1.08245300  | -0.92650200 | C         | -3.20632000 | -1.86720000 | -2.12854400 |
| Co | 0.52858100  | 0.75448500  | -0.72500000 | H         | -1.45539800 | -3.12639400 | -1.84524100 |
| C  | 1.20024100  | -0.12159600 | 2.41564500  | C         | -1.30080500 | 2.40901400  | -0.46166600 |
| C  | 1.92689500  | -1.41831300 | 2.21321900  | C         | -3.45600300 | 1.79515000  | -1.35070400 |
| C  | 2.26546000  | 2.51281300  | -0.71371300 | C         | -3.77137100 | -0.61272000 | -2.01382500 |
| O  | 1.40274100  | 2.51305300  | 0.22175100  | H         | -3.80162200 | -2.68672900 | -2.52003100 |
| O  | 2.13904300  | 1.67219100  | -1.67097800 | C         | -2.60932300 | 2.75950000  | -0.84587700 |
| C  | 3.44690100  | 3.43870900  | -0.68334300 | H         | -0.61677000 | 3.13010100  | -0.03051200 |
| H  | 4.29877700  | 2.88780400  | -0.26726300 | H         | -4.47522900 | 2.04294300  | -1.63153000 |
| H  | 3.71250100  | 3.75418300  | -1.69481800 | H         | -4.79878900 | -0.43075900 | -2.31195400 |
| H  | 3.24819100  | 4.30570600  | -0.05129900 | H         | -2.93457200 | 3.78577000  | -0.72037200 |
| H  | 1.82875100  | 0.75759800  | 2.54019300  | N         | -0.85124500 | 1.16811600  | -0.59465700 |
| H  | 2.60959400  | -1.58396800 | 3.05720400  | Co        | 0.80528700  | 0.48649100  | -0.00219600 |
| H  | 1.24063600  | -2.26608400 | 2.18577700  | C         | 0.21560600  | 0.00213000  | 1.80097900  |
| C  | -0.19854700 | 0.08315100  | 2.41703300  | C         | 1.17106800  | -1.16435200 | 2.05752400  |
| C  | -0.70814800 | 1.40568800  | 2.60388700  | C         | 2.24856100  | 2.37253800  | -0.62455100 |
| C  | -1.15357200 | -0.96008200 | 2.23050600  | O         | 1.61115200  | 2.20046700  | 0.48503700  |
| C  | -2.06916400 | 1.66392900  | 2.58621400  | O         | 2.11160600  | 1.51866600  | -1.54460100 |
| H  | -0.00111000 | 2.21788100  | 2.74733000  | C         | 3.15627600  | 3.55882700  | -0.76533900 |
| C  | -2.51338800 | -0.68692300 | 2.21637600  | H         | 4.08989000  | 3.34763700  | -0.23116400 |
| H  | -0.81677400 | -1.97637600 | 2.06111400  | H         | 3.38521400  | 3.74567700  | -1.81574800 |
| C  | -2.98709100 | 0.62098100  | 2.38946000  | H         | 2.70103300  | 4.44207300  | -0.31036900 |
| H  | -2.42545600 | 2.68179800  | 2.71914700  | H         | 0.54349200  | 0.90243400  | 2.32802300  |
| H  | -3.21742900 | -1.49662100 | 2.04745100  | H         | 1.51775700  | -1.14331300 | 3.09708000  |

|           |             |             |             |             |             |             |             |
|-----------|-------------|-------------|-------------|-------------|-------------|-------------|-------------|
| H         | 0.66964000  | -2.12150300 | 1.90441600  | C           | 0.50864400  | -0.20941700 | 2.09200100  |
| C         | -1.24165900 | -0.20455000 | 1.97785200  | C           | 1.32553600  | -1.47453600 | 2.02300100  |
| C         | -2.04453600 | 0.89899500  | 2.32562800  | C           | 2.40576300  | 2.42430200  | -0.80790500 |
| C         | -1.88635200 | -1.42830500 | 1.72477000  | O           | 2.04329800  | 2.22236900  | 0.41185300  |
| C         | -3.43190900 | 0.79713500  | 2.38259200  | O           | 1.77596300  | 1.85634900  | -1.74513400 |
| H         | -1.56413000 | 1.85267900  | 2.52855300  | C           | 3.60567600  | 3.28835300  | -1.07676000 |
| C         | -3.27557400 | -1.53477000 | 1.78758400  | H           | 4.50521400  | 2.69583900  | -0.87255300 |
| H         | -1.30600500 | -2.30055800 | 1.44569900  | H           | 3.62695700  | 3.61350400  | -2.11805400 |
| C         | -4.05699100 | -0.42251500 | 2.10661600  | H           | 3.61385600  | 4.15159200  | -0.40676500 |
| H         | -4.02639300 | 1.66948600  | 2.63965700  | H           | 1.05384000  | 0.66668600  | 2.44540100  |
| H         | -3.74907900 | -2.48873400 | 1.57343400  | H           | 1.67943800  | -1.70800000 | 3.03743100  |
| H         | -5.13933600 | -0.50484000 | 2.14395000  | H           | 0.71504700  | -2.32012900 | 1.70081300  |
|           |             |             |             | C           | -0.91997200 | -0.14933300 | 2.21719600  |
|           |             |             |             | C           | -1.53089800 | 1.09484400  | 2.53219700  |
| INT2_Ph_T |             |             |             | C           | -1.76865100 | -1.25949700 | 1.97057500  |
| C         | 4.85327400  | -0.69360200 | 0.77223900  | C           | -2.91089400 | 1.22673400  | 2.56579400  |
| C         | 4.73985100  | -0.96193700 | -0.59417600 | H           | -0.89418900 | 1.95372100  | 2.72709300  |
| C         | 3.52747000  | -1.41917300 | -1.10953700 | C           | -3.14955800 | -1.11915700 | 2.01034500  |
| C         | 2.41807800  | -1.58100900 | -0.27204800 | H           | -1.33922400 | -2.22347500 | 1.72581000  |
| C         | 2.52962900  | -1.32746800 | 1.10941600  | C           | -3.73030500 | 0.12230500  | 2.29648700  |
| C         | 3.75797100  | -0.88808900 | 1.61511200  | H           | -3.35601100 | 2.19034300  | 2.79533000  |
| H         | 5.79548700  | -0.34225500 | 1.18256200  | H           | -3.78121600 | -1.97731900 | 1.80177700  |
| H         | 5.59117600  | -0.81984400 | -1.25316300 | H           | -4.81064400 | 0.22860600  | 2.311159200 |
| H         | 3.42547100  | -1.63441800 | -2.16945400 |             |             |             |             |
| H         | 3.85239900  | -0.69569900 | 2.68074100  | INT1_C4H9_Q |             |             |             |
| C         | 1.09872600  | -1.98759200 | -0.88115400 | C           | -4.66330500 | -2.20030500 | 0.12020600  |
| O         | 0.98382600  | -3.09917300 | -1.43674500 | C           | -4.08290000 | -3.24957600 | 0.84863100  |
| N         | 0.16193400  | -1.02142800 | -0.77618600 | C           | -2.75164600 | -3.15883900 | 1.23972300  |
| C         | -1.16780300 | -1.16674100 | -1.15933200 | C           | -2.01329700 | -2.01475600 | 0.89490000  |
| C         | -1.93764500 | 0.04495300  | -1.11799800 | C           | -2.56431100 | -0.94375800 | 0.15062100  |
| C         | -1.82784800 | -2.34115200 | -1.50977500 | C           | -3.91392200 | -1.06696200 | -0.21365700 |
| C         | -3.32577600 | 0.04840200  | -1.43048400 | H           | -5.70435000 | -2.27428600 | -0.18627900 |
| C         | -3.21125900 | -2.33382400 | -1.79979900 | H           | -4.67274600 | -4.12341000 | 1.10993100  |
| H         | -1.27298800 | -3.26730900 | -1.54974900 | H           | -2.28268100 | -3.95260800 | 1.81495300  |
| C         | -1.95346300 | 2.33553900  | -0.69245300 | H           | -4.39435800 | -0.27315300 | -0.78472700 |
| C         | -4.00513600 | 1.29069400  | -1.36644700 | C           | -0.60061700 | -1.89905000 | 1.31194600  |
| C         | -3.95787400 | -1.17580600 | -1.76767000 | O           | 0.06639000  | -2.81674000 | 1.80098800  |
| H         | -3.68957800 | -3.27498600 | -2.05585000 | N           | -0.09430200 | -0.61545000 | 1.04870800  |
| C         | -3.32237700 | 2.43224700  | -1.00862600 | C           | 0.99524200  | -0.08162200 | 1.61977900  |
| H         | -1.38776200 | 3.20939200  | -0.38286100 | C           | 1.33818600  | 1.23758000  | 1.11683300  |
| H         | -5.06566100 | 1.32542000  | -1.59884200 | C           | 1.80958000  | -0.64051800 | 2.63525200  |
| H         | -5.01887800 | -1.18028000 | -1.99684400 | C           | 2.47993700  | 1.92106600  | 1.60160600  |
| H         | -3.81754100 | 3.39503700  | -0.95200300 | C           | 2.92658700  | 0.05399500  | 3.10844300  |
| N         | -1.29250800 | 1.18844800  | -0.74338900 | H           | 1.56446400  | -1.61736100 | 3.02703800  |
| Co        | 0.65767300  | 0.80325300  | -0.07097700 |             |             |             |             |

|             |             |             |             |    |             |             |             |
|-------------|-------------|-------------|-------------|----|-------------|-------------|-------------|
| C           | 0.82082800  | 2.95814300  | -0.34082600 | H  | 5.55545900  | 1.79965200  | -0.92955800 |
| C           | 2.76829800  | 3.18863500  | 1.04564500  | H  | 5.35223200  | 2.91247400  | 1.27957000  |
| C           | 3.27274800  | 1.30319300  | 2.60944000  | H  | 3.26397200  | 2.61118200  | 2.63014900  |
| H           | 3.53827400  | -0.40046600 | 3.88094800  | H  | 3.70691200  | 0.41863500  | -1.82130300 |
| C           | 1.93867100  | 3.70406900  | 0.06905900  | C  | 1.08335400  | 1.09776300  | 1.90859300  |
| H           | 0.14874300  | 3.33294200  | -1.10602100 | O  | 0.84428800  | 1.57660900  | 3.03502900  |
| H           | 3.63817800  | 3.73860900  | 1.39145200  | N  | 0.27095800  | 0.25777600  | 1.20692600  |
| H           | 4.14823500  | 1.82540700  | 2.98211800  | C  | -0.89124700 | -0.33593300 | 1.67677300  |
| H           | 2.13082800  | 4.67049800  | -0.38290500 | C  | -1.44157800 | -1.30705800 | 0.78086000  |
| N           | 0.52675200  | 1.76500700  | 0.17122500  | C  | -1.55668000 | -0.10432600 | 2.87730200  |
| Co          | -1.16450900 | 0.48450900  | -0.38359400 | C  | -2.62663600 | -2.02489700 | 1.09643200  |
| C           | 0.76480700  | -0.60463000 | -2.13045500 | C  | -2.73499600 | -0.82204100 | 3.18712800  |
| C           | -0.43155700 | -1.20812900 | -2.24304000 | H  | -1.16663700 | 0.62742300  | 3.56947000  |
| C           | -2.55269300 | 2.58537600  | -0.95316000 | C  | -1.23641100 | -2.37516500 | -1.28063200 |
| O           | -1.92581800 | 1.81111300  | -1.77034300 | C  | -3.09102800 | -2.95852700 | 0.13562200  |
| O           | -2.50971200 | 2.38059100  | 0.28731400  | C  | -3.27093700 | -1.76282100 | 2.33268500  |
| C           | -3.33814100 | 3.73570800  | -1.53332700 | H  | -3.22736200 | -0.61573400 | 4.13318900  |
| H           | -4.13207800 | 3.34289500  | -2.17735800 | C  | -2.39915200 | -3.13514000 | -1.04272200 |
| H           | -3.77828000 | 4.34904100  | -0.74566300 | H  | -0.67034200 | -2.48320100 | -2.20003800 |
| H           | -2.68327900 | 4.34984900  | -2.15955500 | H  | -3.99446300 | -3.52534500 | 0.34117500  |
| H           | 0.92839200  | 0.34040000  | -2.64977700 | H  | -4.17639800 | -2.30508500 | 2.58569300  |
| H           | -0.62497800 | -2.16712300 | -1.77023400 | H  | -2.73321600 | -3.84173700 | -1.79403500 |
| H           | -1.22045600 | -0.79904700 | -2.86793100 | N  | -0.78035100 | -1.49579500 | -0.40160200 |
| C           | 1.94482200  | -1.17408600 | -1.40165000 | Co | 0.88175300  | -0.34877500 | -0.47882500 |
| C           | 3.04658600  | -1.64392100 | -2.36751500 | C  | -0.72882100 | 0.97492400  | -1.71277500 |
| H           | 1.62679300  | -2.00974200 | -0.76772000 | C  | 0.49205800  | 1.57442300  | -1.65858600 |
| H           | 2.37346500  | -0.41066900 | -0.74067200 | C  | 2.18361700  | -2.15682100 | -1.16490200 |
| C           | 4.28143500  | -2.16952300 | -1.63054900 | O  | 1.68915200  | -1.33017300 | -2.00467400 |
| H           | 2.64286400  | -2.42866600 | -3.02071700 | O  | 1.91673300  | -1.91790200 | 0.06555400  |
| H           | 3.33721300  | -0.81153800 | -3.02292400 | C  | 3.04454300  | -3.30026800 | -1.57787700 |
| C           | 5.38027000  | -2.65113800 | -2.57862200 | H  | 4.07094400  | -2.93353100 | -1.69630700 |
| H           | 4.67545500  | -1.37702900 | -0.97980500 | H  | 3.03658300  | -4.08044500 | -0.81474800 |
| H           | 3.98119200  | -2.99110200 | -0.96627100 | H  | 2.70810300  | -3.69618200 | -2.53854800 |
| H           | 6.25181900  | -3.02031200 | -2.02680400 | H  | -0.91056200 | 0.23930800  | -2.49411700 |
| H           | 5.02134800  | -3.46624400 | -3.21815200 | H  | 0.66464900  | 2.41017200  | -0.98850800 |
| H           | 5.72001900  | -1.84095300 | -3.23479200 | H  | 1.23927500  | 1.39243600  | -2.42268700 |
|             |             |             |             | C  | -1.92134500 | 1.43150400  | -0.92899500 |
|             |             |             |             | C  | -2.78343100 | 2.38649600  | -1.77849300 |
|             |             |             |             | H  | -1.59792200 | 1.94282800  | -0.01698900 |
|             |             |             |             | H  | -2.53713400 | 0.57642400  | -0.63584300 |
|             |             |             |             | C  | -4.04370200 | 2.83868200  | -1.03571700 |
|             |             |             |             | H  | -2.18303000 | 3.26152700  | -2.05880000 |
|             |             |             |             | H  | -3.06802900 | 1.88770000  | -2.71462700 |
|             |             |             |             | C  | -4.90622700 | 3.79298800  | -1.86250000 |
|             |             |             |             |    |             |             |             |
| INT1_C4H9_S |             |             |             |    |             |             |             |
| C           | 4.64758500  | 1.67606100  | -0.34423800 |    |             |             |             |
| C           | 4.53562800  | 2.30408500  | 0.90184100  |    |             |             |             |
| C           | 3.37404300  | 2.14169800  | 1.65617400  |    |             |             |             |
| C           | 2.33506100  | 1.35363200  | 1.15154800  |    |             |             |             |
| C           | 2.43418600  | 0.72787400  | -0.10271900 |    |             |             |             |
| C           | 3.60132900  | 0.89204600  | -0.84860500 |    |             |             |             |

|                |             |             |             |           |             |             |             |
|----------------|-------------|-------------|-------------|-----------|-------------|-------------|-------------|
| H              | -4.63284900 | 1.95498400  | -0.75640700 | H         | 3.39982900  | 4.47034600  | -0.42258300 |
| H              | -3.75174700 | 3.32470100  | -0.09525000 | H         | 2.16768900  | 4.71774400  | 0.85463300  |
| H              | -5.80061600 | 4.10220000  | -1.31054100 | H         | -0.95568800 | 1.03090400  | 2.71991400  |
| H              | -4.34936900 | 4.69897300  | -2.12934000 | H         | 0.15434900  | -1.74180300 | 1.98043600  |
| H              | -5.23668900 | 3.32037200  | -2.79505300 | H         | 1.01555300  | -0.38615800 | 2.90213000  |
|                |             |             |             | C         | -2.26480600 | -0.39013300 | 1.65497700  |
| INT1_C4H9_T.sp |             |             |             | C         | -3.38410900 | -0.58234100 | 2.69264100  |
| C              | 4.73891800  | -1.09654700 | 1.40724500  | H         | -2.12169000 | -1.31697400 | 1.08666700  |
| C              | 4.70515300  | -2.35900800 | 0.80266100  | H         | -2.58766600 | 0.38014400  | 0.94406700  |
| C              | 3.63110400  | -2.71446400 | -0.01230200 | C         | -4.72835100 | -0.93206700 | 2.04904500  |
| C              | 2.60055100  | -1.79318700 | -0.21618200 | H         | -3.09275900 | -1.37327400 | 3.39640800  |
| C              | 2.63426700  | -0.52797100 | 0.38498900  | H         | -3.49106900 | 0.33672100  | 3.28528100  |
| C              | 3.70446000  | -0.17338600 | 1.20214500  | C         | -5.84625600 | -1.12284400 | 3.07493600  |
| H              | 5.57710900  | -0.82689900 | 2.04436500  | H         | -5.00543100 | -0.13729000 | 1.34306600  |
| H              | 5.51593300  | -3.06131400 | 0.97169900  | H         | -4.61500800 | -1.84682800 | 1.45165400  |
| H              | 3.57870800  | -3.69010400 | -0.48796400 | H         | -6.79711400 | -1.37184300 | 2.59094900  |
| H              | 3.74257400  | 0.79773900  | 1.68637000  | H         | -5.60672900 | -1.93242000 | 3.77461900  |
| C              | 1.40372700  | -2.08025800 | -1.04302900 | H         | -6.00118100 | -0.21148100 | 3.66475700  |
| O              | 1.18950500  | -3.15923100 | -1.61422200 |           |             |             |             |
| N              | 0.57907000  | -0.98041400 | -1.06192500 | TS_C4H9_S |             |             |             |
| C              | -0.68003200 | -0.91192500 | -1.66160300 | C         | 4.64150600  | 1.32057400  | 0.01780200  |
| C              | -1.32773000 | 0.35182100  | -1.50120400 | C         | 4.57262500  | 1.59172100  | 1.38900900  |
| C              | -1.35624200 | -1.90986100 | -2.35269900 | C         | 3.35086300  | 1.49344100  | 2.05426700  |
| C              | -2.62817600 | 0.59149900  | -2.01762000 | C         | 2.19997900  | 1.13802200  | 1.34727700  |
| C              | -2.65063600 | -1.66579600 | -2.87197800 | C         | 2.25522800  | 0.89612500  | -0.04268900 |
| H              | -0.89162400 | -2.87549000 | -2.48801800 | C         | 3.48917500  | 0.98552400  | -0.69616300 |
| C              | -1.20705400 | 2.49102700  | -0.57357300 | H         | 5.59439900  | 1.38194600  | -0.50030700 |
| C              | -3.19561000 | 1.86588200  | -1.77200800 | H         | 5.46991800  | 1.86617400  | 1.93542400  |
| C              | -3.28603800 | -0.45313600 | -2.71776200 | H         | 3.27832000  | 1.66232600  | 3.12475400  |
| H              | -3.14978000 | -2.47072600 | -3.40316800 | H         | 3.55051500  | 0.80873700  | -1.76619400 |
| C              | -2.49063000 | 2.80999500  | -1.05429400 | C         | 0.92241600  | 0.85194400  | 2.05736800  |
| H              | -0.62669200 | 3.20101400  | 0.00631400  | O         | 0.70529200  | 1.18834000  | 3.23872700  |
| H              | -4.19067200 | 2.08395500  | -2.14861500 | N         | 0.10075100  | 0.12542200  | 1.26154400  |
| H              | -4.28145100 | -0.28189200 | -3.11464300 | C         | -1.07950600 | -0.49088100 | 1.64891900  |
| H              | -2.90678900 | 3.78937100  | -0.84792700 | C         | -1.58515600 | -1.38590400 | 0.65783700  |
| N              | -0.64884300 | 1.30835400  | -0.79457400 | C         | -1.79571400 | -0.34767100 | 2.83201400  |
| Co             | 1.09131100  | 0.55551100  | -0.07263800 | C         | -2.78612300 | -2.11612000 | 0.85122400  |
| C              | -0.97155800 | 0.02982400  | 2.28650300  | C         | -2.99047200 | -1.08052800 | 3.02594100  |
| C              | 0.12638500  | -0.73216000 | 2.38396000  | H         | -1.43553500 | 0.32325600  | 3.59882600  |
| C              | 2.30609200  | 2.71098800  | 0.13376100  | C         | -1.26534600 | -2.29050700 | -1.46846400 |
| O              | 1.54758500  | 2.14599500  | 1.01264500  | C         | -3.19984900 | -2.96829300 | -0.20393400 |
| O              | 2.50616200  | 2.12186700  | -0.96164200 | C         | -3.48787100 | -1.94543700 | 2.07288900  |
| C              | 2.92737800  | 4.03746800  | 0.45990800  | H         | -3.52793500 | -0.94825600 | 3.96047800  |
| H              | 3.68176900  | 3.89260500  | 1.24095300  | C         | -2.44366500 | -3.05506900 | -1.35277000 |

|           |             |             |             |    |             |             |             |
|-----------|-------------|-------------|-------------|----|-------------|-------------|-------------|
| H         | -0.64983700 | -2.32701400 | -2.36047200 | O  | 0.50452000  | 1.81523900  | 2.96510800  |
| H         | -4.11426800 | -3.54389300 | -0.09461400 | N  | 0.10836400  | 0.19707000  | 1.32497500  |
| H         | -4.40646700 | -2.49898600 | 2.23906500  | C  | -1.13009600 | -0.27776800 | 1.73025600  |
| H         | -2.73777700 | -3.69692600 | -2.17540900 | C  | -1.67730400 | -1.24430900 | 0.82512300  |
| N         | -0.85350200 | -1.49090000 | -0.49520300 | C  | -1.86336900 | 0.06244000  | 2.85851500  |
| Co        | 0.69976000  | -0.31132400 | -0.48177500 | C  | -2.93685200 | -1.84987700 | 1.08049900  |
| C         | -0.37202600 | 1.09255700  | -1.40337500 | C  | -3.11377500 | -0.54724600 | 3.11367600  |
| C         | 0.86470300  | 1.76814600  | -1.18923000 | H  | -1.47034800 | 0.79390200  | 3.55305700  |
| C         | 2.14156100  | -1.95786900 | -1.44560100 | C  | -1.42393100 | -2.41801800 | -1.16530100 |
| O         | 1.49455000  | -1.06671400 | -2.10993100 | C  | -3.41435500 | -2.78721200 | 0.13667600  |
| O         | 1.99313900  | -1.96512400 | -0.18501300 | C  | -3.65086400 | -1.48329300 | 2.25464000  |
| C         | 3.05498800  | -2.90937000 | -2.15069600 | H  | -3.65881000 | -0.26238900 | 4.01245300  |
| H         | 3.99111700  | -2.38581100 | -2.37774900 | C  | -2.65651700 | -3.07595100 | -0.97839900 |
| H         | 3.27659200  | -3.77040000 | -1.51813200 | H  | -0.80892500 | -2.60815000 | -2.04296400 |
| H         | 2.60994000  | -3.23202300 | -3.09514900 | H  | -4.36699600 | -3.27466600 | 0.30334900  |
| H         | -0.50116800 | 0.63348300  | -2.38389600 | H  | -4.61034900 | -1.94709900 | 2.45499800  |
| H         | 1.54244800  | 1.86115500  | -2.02976100 | H  | -2.98876900 | -3.78697100 | -1.72143700 |
| H         | 0.85125100  | 2.62490300  | -0.52233000 | N  | -0.94327400 | -1.53684200 | -0.29583800 |
| C         | -1.64768200 | 1.60504600  | -0.78131100 | Co | 0.76006200  | -0.46932000 | -0.41737400 |
| C         | -2.27044000 | 2.72797000  | -1.62795600 | C  | -0.21365300 | 0.83782500  | -1.58940500 |
| H         | -1.44882100 | 1.98075100  | 0.22736800  | C  | 1.06917800  | 1.39716100  | -1.46053400 |
| H         | -2.37749600 | 0.79354900  | -0.68646900 | C  | 2.08182700  | -2.23868800 | -1.34264000 |
| C         | -3.58298300 | 3.24992600  | -1.03712000 | O  | 1.41009900  | -1.50837600 | -2.13270300 |
| H         | -1.55253800 | 3.55480100  | -1.71773700 | O  | 2.01489100  | -1.95423400 | -0.09828300 |
| H         | -2.44884700 | 2.35964300  | -2.64773100 | C  | 2.96217000  | -3.35382800 | -1.83302200 |
| C         | -4.20826000 | 4.36962700  | -1.87025500 | H  | 3.96202000  | -2.94619600 | -2.01667100 |
| H         | -4.29308900 | 2.41665700  | -0.94700800 | H  | 3.04343200  | -4.13857200 | -1.07842200 |
| H         | -3.39979000 | 3.60899900  | -0.01532600 | H  | 2.57671700  | -3.76094400 | -2.77172200 |
| H         | -5.14493700 | 4.72435800  | -1.42613400 | H  | -0.39438700 | 0.18399500  | -2.43897300 |
| H         | -3.53123500 | 5.22850000  | -1.94979500 | H  | 1.77660400  | 1.22810700  | -2.26173000 |
| H         | -4.43059600 | 4.02829300  | -2.88832400 | H  | 1.12539100  | 2.38049300  | -1.00208200 |
|           |             |             |             | C  | -1.43280500 | 1.53941800  | -1.03846400 |
| TS_C4H9_T |             |             |             | C  | -2.02008100 | 2.54656200  | -2.04712400 |
| C         | 4.68313000  | 1.21930800  | 0.13789700  | H  | -1.17270900 | 2.07048300  | -0.11799700 |
| C         | 4.51751600  | 1.76670400  | 1.41845700  | H  | -2.21031700 | 0.81110700  | -0.78813100 |
| C         | 3.24178300  | 1.80046500  | 1.98703100  | C  | -3.29026300 | 3.21899000  | -1.51386600 |
| C         | 2.14308400  | 1.29324500  | 1.28437600  | H  | -1.26547600 | 3.31369600  | -2.28141000 |
| C         | 2.30192100  | 0.76100300  | -0.01149300 | H  | -2.24409600 | 2.03154400  | -2.99078100 |
| C         | 3.58160700  | 0.73503500  | -0.57819900 | C  | -3.91090500 | 4.21982600  | -2.49131400 |
| H         | 5.67121500  | 1.17927000  | -0.30904700 | H  | -4.02787300 | 2.43602000  | -1.27057100 |
| H         | 5.37323800  | 2.15000100  | 1.96274200  | H  | -3.05896600 | 3.72080800  | -0.56478900 |
| H         | 3.08790400  | 2.18950800  | 2.98548100  | H  | -4.81494200 | 4.67067600  | -2.07356600 |
| H         | 3.72658300  | 0.35247400  | -1.58245500 | H  | -3.21034300 | 5.03026900  | -2.72163300 |
| C         | 0.82378900  | 1.15829400  | 1.95375800  | H  | -4.18059500 | 3.73112900  | -3.43240700 |

## INT2\_C4H9\_Q

|    |             |             |             |
|----|-------------|-------------|-------------|
| C  | -4.74226300 | 0.97994500  | -0.84521700 |
| C  | -4.69490100 | -0.34185100 | -1.29454300 |
| C  | -3.48210400 | -0.88056000 | -1.72037100 |
| C  | -2.30735100 | -0.12030400 | -1.66945400 |
| C  | -2.35084200 | 1.22157600  | -1.24025600 |
| C  | -3.58086900 | 1.75310000  | -0.83324400 |
| H  | -5.68346100 | 1.41255600  | -0.51822200 |
| H  | -5.59703900 | -0.94593300 | -1.31861200 |
| H  | -3.43250200 | -1.90451300 | -2.08012600 |
| H  | -3.62468000 | 2.78999200  | -0.50940300 |
| C  | -1.01858300 | -0.76640900 | -2.11294600 |
| O  | -0.89975700 | -1.13372500 | -3.29898000 |
| N  | -0.10883100 | -0.89938000 | -1.11892600 |
| C  | 1.20466900  | -1.32841000 | -1.32067000 |
| C  | 1.98690100  | -1.48989400 | -0.12355700 |
| C  | 1.83868700  | -1.57277400 | -2.53629900 |
| C  | 3.35655300  | -1.87592500 | -0.18407800 |
| C  | 3.19859600  | -1.95628100 | -2.58766000 |
| H  | 1.27624800  | -1.46766000 | -3.45218100 |
| C  | 2.05740100  | -1.37326200 | 2.20982200  |
| C  | 4.05503300  | -2.00191900 | 1.04242400  |
| C  | 3.95557600  | -2.11021400 | -1.44798100 |
| H  | 3.64735700  | -2.13230400 | -3.56114600 |
| C  | 3.41223200  | -1.75228400 | 2.23556100  |
| H  | 1.51261600  | -1.16468900 | 3.12574000  |
| H  | 5.10057300  | -2.29592500 | 1.02472100  |
| H  | 4.99872200  | -2.40647800 | -1.49450800 |
| H  | 3.92561500  | -1.84032800 | 3.18626700  |
| N  | 1.37714700  | -1.25291900 | 1.07768400  |
| Co | -0.57437800 | -0.57917900 | 0.82116900  |
| C  | -0.42578900 | 2.02043600  | 0.15742200  |
| C  | -1.09912400 | 2.07943800  | -1.18265600 |
| C  | -2.20573700 | -0.79028700 | 2.66762900  |
| O  | -1.15123400 | -0.10220400 | 2.86017400  |
| O  | -2.37009500 | -1.36812300 | 1.53871400  |
| C  | -3.26294200 | -0.89008100 | 3.72988800  |
| H  | -3.93359100 | -0.02832700 | 3.63129500  |
| H  | -3.85202600 | -1.80070200 | 3.60690900  |
| H  | -2.81181000 | -0.85712200 | 4.72381200  |
| H  | -1.05200800 | 2.22106600  | 1.02752100  |
| H  | -1.38469200 | 3.11937800  | -1.41105000 |
| H  | -0.39069700 | 1.77788200  | -1.96141100 |

|   |            |            |             |
|---|------------|------------|-------------|
| C | 1.05254800 | 2.18623600 | 0.29715300  |
| C | 1.52617700 | 3.65156100 | 0.14758200  |
| H | 1.56438200 | 1.57994800 | -0.46259400 |
| H | 1.37931500 | 1.81686300 | 1.27783100  |
| C | 3.04290700 | 3.78918400 | 0.30645300  |
| H | 1.22228000 | 4.03194600 | -0.83637700 |
| H | 1.01770400 | 4.27375000 | 0.89604500  |
| C | 3.52919100 | 5.23257000 | 0.16847600  |
| H | 3.33856200 | 3.39285000 | 1.28741700  |
| H | 3.54098800 | 3.15856700 | -0.44249200 |
| H | 4.61644400 | 5.30138600 | 0.28591800  |
| H | 3.27369600 | 5.64411100 | -0.81517400 |
| H | 3.07091000 | 5.87847500 | 0.92682500  |

## INT2\_C4H9\_S

|   |             |             |             |
|---|-------------|-------------|-------------|
| C | 4.42624500  | 1.37090300  | 0.12325400  |
| C | 4.52535300  | 0.49182900  | 1.20918500  |
| C | 3.39097900  | 0.16989600  | 1.94578700  |
| C | 2.14371500  | 0.71077100  | 1.59964700  |
| C | 2.03806300  | 1.63908900  | 0.53172400  |
| C | 3.20130100  | 1.94685900  | -0.19723100 |
| H | 5.30926200  | 1.61876800  | -0.45797100 |
| H | 5.48408700  | 0.05412800  | 1.47019300  |
| H | 3.44848500  | -0.52514000 | 2.77799100  |
| H | 3.13204000  | 2.66006400  | -1.01396400 |
| C | 0.91846500  | 0.15812300  | 2.28551800  |
| O | 0.80029900  | 0.08557400  | 3.52152800  |
| N | 0.06989300  | -0.30859700 | 1.34920600  |
| C | -1.11416700 | -1.00548900 | 1.52796100  |
| C | -1.61143100 | -1.52527800 | 0.29693500  |
| C | -1.83986300 | -1.23960300 | 2.68732200  |
| C | -2.82494600 | -2.25224800 | 0.22433600  |
| C | -3.04944100 | -1.97281900 | 2.61839300  |
| H | -1.47953100 | -0.86226700 | 3.63490700  |
| C | -1.24733700 | -1.71029000 | -2.00658200 |
| C | -3.22635800 | -2.70875200 | -1.05664200 |
| C | -3.54381200 | -2.47009300 | 1.42943800  |
| H | -3.60040700 | -2.14370400 | 3.53847700  |
| C | -2.44187100 | -2.44095600 | -2.15892300 |
| H | -0.60838100 | -1.47239000 | -2.84889100 |
| H | -4.15230300 | -3.26695500 | -1.15726700 |
| H | -4.47303900 | -3.02965400 | 1.39827900  |
| H | -2.72634100 | -2.77845100 | -3.14890500 |
| N | -0.85247700 | -1.27358100 | -0.81755200 |

Co 0.67752500 -0.24925400 -0.43434700  
 C -0.13823300 1.47618400 -0.75309800  
 C 0.71494000 2.32443500 0.19709400  
 C 2.31119500 -1.39778600 -1.87072700  
 O 1.55347100 -0.39646600 -2.17247000  
 O 2.20468900 -1.92242600 -0.72798100  
 C 3.31848500 -1.87102200 -2.87779200  
 H 4.18872500 -1.20562800 -2.83558000  
 H 3.64259500 -2.88786000 -2.65008500  
 H 2.90326900 -1.81876100 -3.88719600  
 H 0.15200400 1.64444100 -1.79749500  
 H 0.93584800 3.30320400 -0.24334400  
 H 0.16122300 2.50017700 1.12481100  
 C -1.63542300 1.64390700 -0.57375400  
 C -2.11572900 3.07826500 -0.85269000  
 H -1.92064900 1.37219400 0.44978100  
 H -2.17107000 0.96296800 -1.24549200  
 C -3.63146600 3.23198200 -0.69564600  
 H -1.61159200 3.77701400 -0.17231400  
 H -1.82155400 3.36990600 -1.87080400  
 C -4.11753200 4.65934800 -0.95149400  
 H -4.13756900 2.54097100 -1.38356900  
 H -3.92030200 2.92170700 0.31792400  
 H -5.20376100 4.74109900 -0.83285400  
 H -3.65258700 5.36591400 -0.25357000  
 H -3.86799900 4.98636500 -1.96798800

INT2\_C4H9\_T

C -4.90211600 0.94224200 -0.55230200  
 C -4.88283100 -0.34215700 -1.10175900  
 C -3.68600000 -0.86562500 -1.58645800  
 C -2.49790800 -0.12857100 -1.49867700  
 C -2.51497800 1.17664900 -0.96734200  
 C -3.72858200 1.69516200 -0.50064100  
 H -5.83114500 1.36245000 -0.17815900  
 H -5.79487800 -0.92892600 -1.15679300  
 H -3.65693600 -1.85725700 -2.02811000  
 H -3.75004600 2.70591600 -0.10156000  
 C -1.23544500 -0.76597500 -2.01590700  
 O -1.24289100 -1.28642500 -3.14921700  
 N -0.19550400 -0.75539000 -1.14357800  
 C 1.08436300 -1.21671500 -1.46368600  
 C 1.99116400 -1.30936900 -0.35349500  
 C 1.57512400 -1.55393000 -2.72210100

C 3.33664900 -1.73984200 -0.52920800  
 C 2.91482200 -1.97430700 -2.89082100  
 H 0.91987200 -1.50034000 -3.57822300  
 C 2.29905800 -1.03932800 1.94153400  
 C 4.15511900 -1.80367700 0.62657000  
 C 3.78853400 -2.07458100 -1.83092000  
 H 3.25153400 -2.22600500 -3.89243100  
 C 3.64116500 -1.45904000 1.85770400  
 H 1.85685200 -0.75391500 2.89193200  
 H 5.18710600 -2.12707400 0.52476000  
 H 4.81369200 -2.40289800 -1.97047400  
 H 4.24607100 -1.50095300 2.75643400  
 N 1.51399100 -0.96705100 0.87757500  
 Co -0.46695500 -0.33132400 0.77663200  
 C -0.42585500 1.73463900 0.33722000  
 C -1.25246200 2.00806900 -0.89916900  
 C -1.49746700 -1.42610300 2.80427900  
 O -1.33839300 -0.16668300 2.54514100  
 O -1.11621100 -2.28792000 1.97309300  
 C -2.12972300 -1.80078800 4.11610200  
 H -3.08610800 -1.28070000 4.22621100  
 H -2.28173500 -2.87893000 4.18096500  
 H -1.48050000 -1.47210300 4.93470000  
 H -0.95165500 1.98785000 1.26359200  
 H -1.53357700 3.07074500 -0.89037600  
 H -0.63829000 1.84766900 -1.79049600  
 C 1.02161700 2.15018000 0.31356100  
 C 1.18345500 3.68390100 0.22675000  
 H 1.52722600 1.68924800 -0.54350200  
 H 1.52731800 1.79950000 1.21993500  
 C 2.65352500 4.11041600 0.27183200  
 H 0.72441100 4.04958700 -0.69998100  
 H 0.63782600 4.15386000 1.05589200  
 C 2.83199900 5.62670900 0.18223200  
 H 3.10818400 3.73918300 1.20007400  
 H 3.19400000 3.62547000 -0.55213500  
 H 3.89066800 5.90677800 0.21642700  
 H 2.41317200 6.01990000 -0.75163300  
 H 2.32590500 6.13424900 1.01198800

INT1\_CH2OH\_Q

C -4.80639600 -1.73155600 0.27888600  
 C -4.38301500 -2.58973000 1.30543700  
 C -3.08315100 -2.49276500 1.78896200

C -2.21637900 -1.53597600 1.23513700  
 C -2.60857000 -0.66474400 0.19073000  
 C -3.93230700 -0.78159300 -0.25945700  
 H -5.82319800 -1.81151100 -0.09909200  
 H -5.07022800 -3.32000100 1.72277600  
 H -2.73553700 -3.13678100 2.59225200  
 H -4.29046300 -0.13497100 -1.05978500  
 C -0.83558700 -1.41315000 1.74661300  
 O -0.30830700 -2.19635900 2.54282000  
 N -0.17731500 -0.30519900 1.18596100  
 C 0.91766200 0.28499300 1.69293500  
 C 1.43507700 1.36798500 0.87495000  
 C 1.58171000 -0.00860700 2.90811200  
 C 2.59510300 2.07929700 1.26715400  
 C 2.71935600 0.71225900 3.28444500  
 H 1.20463100 -0.80481200 3.53419200  
 C 1.21066400 2.62641400 -1.05494300  
 C 3.05332800 3.10577100 0.40936000  
 C 3.23203200 1.73033100 2.49119100  
 H 3.21246500 0.46365800 4.21850400  
 C 2.36195900 3.37426100 -0.75588800  
 H 0.63803700 2.81585100 -1.95736100  
 H 3.94187600 3.66905200 0.67748400  
 H 4.12038100 2.27517400 2.79459900  
 H 2.68584400 4.15192300 -1.43813000  
 N 0.76010000 1.65646300 -0.26262800  
 Co -1.04503300 0.47472100 -0.54721800  
 C 0.69297100 -1.13853800 -1.90793300  
 C -0.54586900 -1.65523900 -1.95075500  
 C -2.20576800 2.50098100 -1.59634500  
 O -1.68289900 1.51134600 -2.23161100  
 O -2.15634000 2.54809900 -0.33795000  
 C -2.86686500 3.59346300 -2.39827800  
 H -3.64858400 3.16115700 -3.03093800  
 H -3.29844700 4.35443300 -1.74648000  
 H -2.12698400 4.05448200 -3.06108200  
 H 0.98150100 -0.35260600 -2.60477000  
 H -0.83783000 -2.46925400 -1.29363900  
 H -1.27914000 -1.32112800 -2.67877100  
 C 1.77444300 -1.64563300 -0.99894900  
 H 1.35271400 -2.33428300 -0.25292000  
 H 2.24278200 -0.81086300 -0.46248200  
 O 2.74944900 -2.30060900 -1.82008800  
 H 3.55263000 -2.40311200 -1.28977900

INT1\_CH2OH\_S

C -4.61904500 -1.67243600 -0.34722300  
 C -4.50931100 -2.29500500 0.90176800  
 C -3.34545800 -2.13751200 1.65325300  
 C -2.30024900 -1.36164600 1.14226400  
 C -2.39771000 -0.74335400 -0.11525800  
 C -3.56748200 -0.90042700 -0.85830700  
 H -5.52899400 -1.79140300 -0.93016400  
 H -5.33006800 -2.89452600 1.28454100  
 H -3.23780500 -2.60062900 2.63044600  
 H -3.67055900 -0.43193700 -1.83342200  
 C -1.05102400 -1.10264800 1.90155000  
 O -0.82025900 -1.56643600 3.03525200  
 N -0.23160700 -0.27217100 1.19530100  
 C 0.91335800 0.34535900 1.67921700  
 C 1.45976900 1.32015100 0.78524200  
 C 1.56353500 0.13466900 2.89181700  
 C 2.62650600 2.06174600 1.11304200  
 C 2.72280800 0.87724600 3.21488400  
 H 1.17586900 -0.59825500 3.58416100  
 C 1.26346100 2.37253900 -1.28581200  
 C 3.08738700 2.99776000 0.15279400  
 C 3.25538400 1.82076600 2.36138700  
 H 3.20286100 0.68810400 4.17073600  
 C 2.40965800 3.15383500 -1.03657800  
 H 0.70791800 2.46607300 -2.21314300  
 H 3.97654400 3.58329500 0.36762600  
 H 4.14642200 2.38169600 2.62456500  
 H 2.74154700 3.86164200 -1.78774500  
 N 0.81038300 1.49182100 -0.40665900  
 Co -0.84098100 0.33573600 -0.49141400  
 C 0.67683400 -0.98448600 -1.71205600  
 C -0.53510000 -1.60031100 -1.71486300  
 C -2.15347100 2.14012300 -1.15728700  
 O -1.65800100 1.32218400 -2.00495400  
 O -1.87978700 1.89015000 0.06996300  
 C -3.02146200 3.28208900 -1.55671300  
 H -4.04567500 2.90983000 -1.67712500  
 H -3.01688600 4.05416300 -0.78547600  
 H -2.68898700 3.68953300 -2.51395300  
 H 0.90447100 -0.24378000 -2.47467000  
 H -0.72144000 -2.45119900 -1.06837500  
 H -1.27399900 -1.38794700 -2.47901200



|              |             |             |             |            |             |             |             |
|--------------|-------------|-------------|-------------|------------|-------------|-------------|-------------|
| C            | 1.84013900  | -1.49317200 | -0.90289800 | H          | -3.47229200 | 4.29023500  | -1.60002400 |
| H            | 1.47959900  | -2.07100000 | -0.04251200 | H          | -2.60210200 | 3.66530100  | -3.03890000 |
| H            | 2.45498600  | -0.66584800 | -0.53553900 | H          | 1.19262900  | -0.45639800 | -2.45646500 |
| O            | 2.60478900  | -2.31446600 | -1.79477500 | H          | -0.79540500 | -2.57756700 | -1.43101600 |
| H            | 3.47363600  | -2.44682500 | -1.38864600 | H          | -1.07661600 | -1.33993000 | -2.77999000 |
| INT1_CH2OH_T |             |             |             | C          | 1.78106100  | -1.80741700 | -0.81862800 |
| C            | -4.63067500 | -1.63195100 | -0.15758900 | H          | 1.29584000  | -2.58577700 | -0.21137900 |
| C            | -4.37995600 | -2.46374100 | 0.94015600  | H          | 2.09086100  | -1.00043800 | -0.14227400 |
| C            | -3.20325100 | -2.31716800 | 1.67441000  | O          | 2.92660400  | -2.32433000 | -1.51026400 |
| C            | -2.28851100 | -1.33058800 | 1.29850200  | H          | 3.62688600  | -2.45338900 | -0.85483200 |
| C            | -2.53789600 | -0.49652100 | 0.19994500  | TS_CH2OH_S |             |             |             |
| C            | -3.71054400 | -0.64452500 | -0.53590400 | C          | 4.63625300  | 1.33210000  | 0.02095600  |
| H            | -5.54783400 | -1.75450800 | -0.72765800 | C          | 4.55996200  | 1.61669400  | 1.38899800  |
| H            | -5.10247700 | -3.22575900 | 1.21674100  | C          | 3.33658700  | 1.51712000  | 2.05118900  |
| H            | -2.98340500 | -2.95504300 | 2.52625400  | C          | 2.19122900  | 1.14600900  | 1.34299800  |
| H            | -3.91398600 | -0.01968500 | -1.40031100 | C          | 2.25500100  | 0.88947700  | -0.04300300 |
| C            | -0.99969800 | -1.10594800 | 1.99752900  | C          | 3.48906100  | 0.98062200  | -0.69429400 |
| O            | -0.60294300 | -1.76943200 | 2.96592100  | H          | 5.59075000  | 1.39475300  | -0.49398900 |
| N            | -0.32333900 | -0.06742900 | 1.40138300  | H          | 5.45333200  | 1.90296200  | 1.93572200  |
| C            | 0.93378100  | 0.41071300  | 1.77414400  | H          | 3.25846600  | 1.69709000  | 3.11942400  |
| C            | 1.43974600  | 1.43067300  | 0.91058900  | H          | 3.55603300  | 0.79257800  | -1.76195800 |
| C            | 1.72144700  | 0.01022200  | 2.84625900  | C          | 0.91219200  | 0.85927000  | 2.04892200  |
| C            | 2.70914600  | 2.02694200  | 1.12852900  | O          | 0.68819500  | 1.20042400  | 3.22686100  |
| C            | 2.98616800  | 0.60864900  | 3.06292200  | N          | 0.09339400  | 0.12691100  | 1.25297800  |
| H            | 1.36631100  | -0.76377800 | 3.51063500  | C          | -1.07850600 | -0.50427900 | 1.64570000  |
| C            | 1.06532100  | 2.71715100  | -1.00098900 | C          | -1.58598700 | -1.39449700 | 0.65141300  |
| C            | 3.12291300  | 3.01933000  | 0.20620000  | C          | -1.78237000 | -0.38205200 | 2.83859900  |
| C            | 3.48297300  | 1.59309400  | 2.23675100  | C          | -2.77630600 | -2.14037500 | 0.85086600  |
| H            | 3.57454300  | 0.27047700  | 3.91067700  | C          | -2.96643500 | -1.13047300 | 3.03851400  |
| C            | 2.30671200  | 3.36252000  | -0.85165600 | H          | -1.42081100 | 0.28378500  | 3.60898000  |
| H            | 0.40050300  | 2.95226600  | -1.82556100 | C          | -1.27987100 | -2.27494500 | -1.48773100 |
| H            | 4.08712300  | 3.50021900  | 0.34236100  | C          | -3.19222600 | -2.98648200 | -0.20827700 |
| H            | 4.45488900  | 2.04218100  | 2.41386800  | C          | -3.46566100 | -1.99053800 | 2.08216700  |
| H            | 2.60291500  | 4.11601700  | -1.57230900 | H          | -3.49402200 | -1.01430200 | 3.98077200  |
| N            | 0.64874200  | 1.78939500  | -0.14888300 | C          | -2.44848700 | -3.05328200 | -1.36644400 |
| Co           | -1.07053900 | 0.72219200  | -0.15156000 | H          | -0.67408900 | -2.29720700 | -2.38677400 |
| C            | 0.82264900  | -1.27566200 | -1.84030100 | H          | -4.09842700 | -3.57409700 | -0.09437500 |
| C            | -0.41074100 | -1.75451200 | -2.02843400 | H          | -4.37591900 | -2.55620400 | 2.25318600  |
| C            | -2.43309800 | 2.44167000  | -1.29056700 | H          | -2.74478400 | -3.69028700 | -2.19203400 |
| O            | -1.74461600 | 1.50028700  | -1.84098500 | N          | -0.86597400 | -1.48147200 | -0.51034100 |
| O            | -2.45641300 | 2.50970600  | -0.03153900 | Co         | 0.69002800  | -0.30196600 | -0.49291700 |
| C            | -3.19453100 | 3.39681900  | -2.16098100 | C          | -0.37516600 | 1.10510400  | -1.41079600 |
| H            | -4.10639100 | 2.89852700  | -2.50954800 | C          | 0.85796700  | 1.78336400  | -1.21655300 |

|            |             |             |             |              |             |             |             |
|------------|-------------|-------------|-------------|--------------|-------------|-------------|-------------|
| C          | 2.11643300  | -1.95291800 | -1.43863600 | H            | -2.92335100 | -3.67000900 | -2.12641700 |
| O          | 1.48820300  | -1.06120600 | -2.11857900 | N            | -0.93521700 | -1.53262200 | -0.47016500 |
| O          | 1.95069000  | -1.93578900 | -0.17846900 | Co           | 0.71988000  | -0.36826700 | -0.49434500 |
| C          | 3.02102600  | -2.93075600 | -2.11532900 | C            | -0.28416500 | 1.16573600  | -1.50149600 |
| H          | 3.96532200  | -2.42504700 | -2.34844200 | C            | 0.94095700  | 1.83548600  | -1.28499400 |
| H          | 3.22608500  | -3.78008900 | -1.46180600 | C            | 2.17479400  | -2.01244200 | -1.72991800 |
| H          | 2.57652700  | -3.26817200 | -3.05486900 | O            | 1.46440700  | -1.26072300 | -2.45916300 |
| H          | -0.53850500 | 0.65027500  | -2.38716700 | O            | 2.12807200  | -1.87714200 | -0.45573500 |
| H          | 1.53999400  | 1.85528400  | -2.05535300 | C            | 3.10449800  | -3.03155200 | -2.32746600 |
| H          | 0.86380500  | 2.63716600  | -0.54671300 | H            | 4.10883500  | -2.59508100 | -2.38061900 |
| C          | -1.62780600 | 1.62460500  | -0.75760400 | H            | 3.15722800  | -3.92081200 | -1.69504100 |
| H          | -1.40725100 | 2.01369800  | 0.24368000  | H            | 2.78706800  | -3.29969600 | -3.33678400 |
| H          | -2.37879600 | 0.83118900  | -0.66244500 | H            | -0.42365100 | 0.64072200  | -2.44454400 |
| O          | -2.12725900 | 2.67116300  | -1.60649500 | H            | 1.65144000  | 1.86181700  | -2.10232200 |
| H          | -2.98091100 | 2.95227100  | -1.24598700 | H            | 0.92683000  | 2.71137000  | -0.64457400 |
| TS_CH2OH_T |             |             |             | C            | -1.54245500 | 1.63486200  | -0.81888800 |
| C          | 4.63058600  | 1.39575900  | 0.14938800  | H            | -1.31279200 | 2.01160200  | 0.18551300  |
| C          | 4.49857700  | 1.71204300  | 1.50496700  | H            | -2.26768500 | 0.81873000  | -0.72726700 |
| C          | 3.25069300  | 1.62140500  | 2.12145200  | O            | -2.07621900 | 2.68021500  | -1.64495900 |
| C          | 2.12853800  | 1.22521800  | 1.38759100  | H            | -2.94902200 | 2.90777600  | -1.29178500 |
| C          | 2.25765800  | 0.96275900  | 0.00808000  | INT2_CH2OH_Q |             |             |             |
| C          | 3.50959600  | 1.03568600  | -0.60378300 | C            | 4.65684700  | -0.81363100 | -0.13482100 |
| H          | 5.60373000  | 1.44524700  | -0.33054600 | C            | 4.21150900  | -1.14585200 | -1.41632400 |
| H          | 5.36920700  | 2.00913000  | 2.08163000  | C            | 2.89018400  | -1.54740600 | -1.60272400 |
| H          | 3.13396100  | 1.81550200  | 3.18381800  | C            | 1.99818200  | -1.58836600 | -0.52419000 |
| H          | 3.61210300  | 0.83093700  | -1.66532000 | C            | 2.44842100  | -1.28813100 | 0.77605500  |
| C          | 0.84452300  | 0.91388400  | 2.08838300  | C            | 3.78283700  | -0.90075200 | 0.94911300  |
| O          | 0.56528300  | 1.37317600  | 3.21277600  | H            | 5.68610700  | -0.50471400 | 0.02355900  |
| N          | 0.11924600  | 0.03452200  | 1.35270100  | H            | 4.89002000  | -1.09657200 | -2.26279200 |
| C          | -1.07107000 | -0.57137600 | 1.72522300  | H            | 2.53159600  | -1.81205300 | -2.59344900 |
| C          | -1.61675900 | -1.43434300 | 0.71540500  | H            | 4.13926100  | -0.67581900 | 1.95124400  |
| C          | -1.76564100 | -0.44941700 | 2.92370200  | C            | 0.57004600  | -1.98355300 | -0.79948400 |
| C          | -2.82731300 | -2.14707700 | 0.93047800  | O            | 0.33347500  | -3.11597000 | -1.26564600 |
| C          | -2.96810700 | -1.16459700 | 3.13334000  | N            | -0.32967700 | -1.00642900 | -0.53020600 |
| H          | -1.37589700 | 0.19737700  | 3.69718200  | C            | -1.71181000 | -1.18839200 | -0.61710400 |
| C          | -1.40120000 | -2.30334500 | -1.44403700 | C            | -2.49714600 | 0.00906200  | -0.47980800 |
| C          | -3.29545000 | -2.96888700 | -0.12466400 | C            | -2.40049600 | -2.38759400 | -0.78287300 |
| C          | -3.49868100 | -1.99766500 | 2.17236000  | C            | -3.92040500 | -0.03290400 | -0.51208100 |
| H          | -3.48020400 | -1.04601100 | 4.08377900  | C            | -3.81355300 | -2.42144200 | -0.81386900 |
| C          | -2.58590700 | -3.04995300 | -1.30373100 | H            | -1.84087200 | -3.30428200 | -0.89493100 |
| H          | -0.81784000 | -2.33140500 | -2.35805200 | C            | -2.51033000 | 2.32754100  | -0.17832300 |
| H          | -4.21704700 | -3.52788200 | 0.00902000  | C            | -4.61419400 | 1.19409900  | -0.36772700 |
| H          | -4.42107200 | -2.54318100 | 2.34437300  | C            | -4.57269200 | -1.28005900 | -0.68507500 |

|              |             |             |             |              |             |             |             |
|--------------|-------------|-------------|-------------|--------------|-------------|-------------|-------------|
| H            | -4.30268300 | -3.38228200 | -0.94620000 | C            | 3.01969000  | -1.99869800 | -2.60985000 |
| C            | -3.91616700 | 2.37066900  | -0.20070000 | H            | 1.43310100  | -0.90174700 | -3.61256500 |
| H            | -1.92050600 | 3.23022000  | -0.05021400 | C            | 1.28027700  | -1.71041100 | 2.03701900  |
| H            | -5.70023100 | 1.19064400  | -0.39135900 | C            | 3.24313700  | -2.71829900 | 1.06424300  |
| H            | -5.65722700 | -1.31276900 | -0.71428000 | C            | 3.53090500  | -2.48890300 | -1.42530300 |
| H            | -4.42460800 | 3.32140100  | -0.08760900 | H            | 3.55845300  | -2.17273300 | -3.53652400 |
| N            | -1.83413000 | 1.19411100  | -0.31575800 | C            | 2.47299000  | -2.44582800 | 2.17556800  |
| Co           | 0.21718800  | 0.92569400  | -0.23496600 | H            | 0.65319000  | -1.46780800 | 2.88653900  |
| C            | 0.82997400  | -0.06708500 | 2.25557200  | H            | 4.16807400  | -3.27994500 | 1.15455100  |
| C            | 1.52207600  | -1.36501100 | 1.97573700  | H            | 4.46061900  | -3.04798500 | -1.40287800 |
| C            | 1.84360200  | 2.72623600  | -0.72551200 | H            | 2.76738700  | -2.78328800 | 3.16256900  |
| O            | 0.98271500  | 2.91397800  | 0.19497900  | N            | 0.87297400  | -1.27597600 | 0.85072800  |
| O            | 1.80293500  | 1.63883400  | -1.39754200 | Co           | -0.67482200 | -0.27967200 | 0.48529800  |
| C            | 2.92285200  | 3.73605500  | -0.99078800 | C            | 0.09153300  | 1.46457600  | 0.79452900  |
| H            | 3.80514800  | 3.45691100  | -0.40256000 | C            | -0.69479300 | 2.31712100  | -0.20795200 |
| H            | 3.20400900  | 3.73089000  | -2.04589200 | C            | -2.24759900 | -1.47743300 | 1.89795500  |
| H            | 2.60464000  | 4.73385500  | -0.68343800 | O            | -1.52295100 | -0.45932100 | 2.22441600  |
| H            | 1.43498300  | 0.83726400  | 2.29385300  | O            | -2.12326100 | -1.95628400 | 0.73460100  |
| H            | 2.11839900  | -1.65957900 | 2.85364100  | C            | -3.21992700 | -2.03033000 | 2.89573700  |
| H            | 0.77497000  | -2.15375300 | 1.83693000  | H            | -4.05295000 | -1.32656200 | 3.00268800  |
| C            | -0.54329200 | -0.05751100 | 2.83342100  | H            | -3.60561700 | -2.99549600 | 2.56456000  |
| H            | -1.22782700 | -0.61366100 | 2.17602800  | H            | -2.73829900 | -2.12764300 | 3.87253600  |
| H            | -0.91994600 | 0.97086600  | 2.92354200  | H            | -0.23720400 | 1.65974900  | 1.82232000  |
| O            | -0.50948000 | -0.70005300 | 4.12707200  | H            | -0.88222800 | 3.31625300  | 0.20010100  |
| H            | -1.42267700 | -0.92583200 | 4.35768900  | H            | -0.10233800 | 2.44398000  | -1.11942900 |
|              |             |             |             | C            | 1.58852200  | 1.62580600  | 0.68160600  |
| INT2_CH2OH_S |             |             |             | H            | 1.93136200  | 1.33875300  | -0.32145000 |
| C            | -4.44400300 | 1.53764100  | -0.22390600 | H            | 2.10562100  | 0.99293600  | 1.41470200  |
| C            | -4.55263600 | 0.62879500  | -1.28357300 | O            | 1.90063000  | 3.01010700  | 0.92260800  |
| C            | -3.41200300 | 0.23052500  | -1.97222200 | H            | 2.84292900  | 3.13139200  | 0.73762600  |
| C            | -2.15281800 | 0.72667100  | -1.60505600 |              |             |             |             |
| C            | -2.03504900 | 1.68234000  | -0.56520700 | INT2_CH2OH_T |             |             |             |
| C            | -3.20228500 | 2.06472000  | 0.11846500  | C            | -4.48202000 | 2.12040000  | -0.83573700 |
| H            | -5.33122600 | 1.84676300  | 0.32053900  | C            | -4.61807600 | 0.99464500  | -1.65184700 |
| H            | -5.52289000 | 0.22919000  | -1.56252900 | C            | -3.48213400 | 0.29894400  | -2.05943300 |
| H            | -3.47644900 | -0.48522300 | -2.78614000 | C            | -2.20895900 | 0.69846100  | -1.63210400 |
| H            | -3.12462300 | 2.80090300  | 0.91389500  | C            | -2.06350200 | 1.84505800  | -0.82579200 |
| C            | -0.93541000 | 0.12540600  | -2.25696400 | C            | -3.21310600 | 2.54399000  | -0.43969300 |
| O            | -0.81308100 | 0.02089900  | -3.49056400 | H            | -5.36049200 | 2.67554000  | -0.51988600 |
| N            | -0.09089100 | -0.33498600 | -1.31102900 | H            | -5.60162800 | 0.66604900  | -1.97405000 |
| C            | 1.09521800  | -1.02866600 | -1.49996900 | H            | -3.56951200 | -0.56802400 | -2.70728900 |
| C            | 1.61372800  | -1.53649400 | -0.27366200 | H            | -3.10538100 | 3.43654700  | 0.17101300  |
| C            | 1.80712100  | -1.26972100 | -2.66710900 | C            | -1.02859600 | -0.10293600 | -2.11073700 |
| C            | 2.82753600  | -2.26458800 | -0.21270000 | O            | -0.95242700 | -0.39521400 | -3.31990000 |

|                     |             |             |             |    |             |             |             |
|---------------------|-------------|-------------|-------------|----|-------------|-------------|-------------|
| N                   | -0.15572200 | -0.48717200 | -1.14233600 | H  | 5.50556200  | -2.61464300 | -0.43152700 |
| C                   | 1.04808400  | -1.14717800 | -1.40938300 | H  | 3.22907200  | -3.61326700 | -0.20066000 |
| C                   | 1.73216700  | -1.65292800 | -0.25320900 | H  | 3.78884700  | 1.32730200  | -0.35808600 |
| C                   | 1.66023300  | -1.33013000 | -2.64629600 | C  | 0.89616100  | -2.27403800 | 0.01493800  |
| C                   | 2.98106100  | -2.32674400 | -0.36363300 | O  | 0.67382000  | -3.48138400 | 0.15533900  |
| C                   | 2.90417100  | -1.99512600 | -2.74945700 | N  | -0.10110800 | -1.28327500 | 0.00057300  |
| H                   | 1.17325800  | -0.96732500 | -3.53858000 | C  | -1.41630300 | -1.50808100 | -0.15823800 |
| C                   | 1.71345600  | -1.91105500 | 2.06414800  | C  | -2.22794000 | -0.30315200 | -0.11996500 |
| C                   | 3.57557100  | -2.79429900 | 0.83533100  | C  | -2.07407300 | -2.74513200 | -0.37020000 |
| C                   | 3.56220000  | -2.49185200 | -1.64618100 | C  | -3.63608900 | -0.37470700 | -0.25208700 |
| H                   | 3.34161300  | -2.11440500 | -3.73647600 | C  | -3.46497200 | -2.79528000 | -0.50419200 |
| C                   | 2.94595100  | -2.59233500 | 2.04447200  | H  | -1.48572500 | -3.65023100 | -0.41244700 |
| H                   | 1.18569000  | -1.72642100 | 2.99558700  | C  | -2.28116000 | 2.00348100  | 0.08255700  |
| H                   | 4.52911900  | -3.31188500 | 0.78384700  | C  | -4.36189700 | 0.83756000  | -0.19536300 |
| H                   | 4.51391000  | -3.00571000 | -1.73746200 | C  | -4.24413300 | -1.64779900 | -0.44174500 |
| H                   | 3.37884900  | -2.94226400 | 2.97480500  | H  | -3.94239000 | -3.75760800 | -0.65730100 |
| N                   | 1.13904900  | -1.46094500 | 0.95876700  | C  | -3.68183300 | 2.02755500  | -0.02459100 |
| Co                  | -0.66442600 | -0.43066900 | 0.76952500  | H  | -1.71364900 | 2.91947700  | 0.21160400  |
| C                   | -0.18909000 | 1.58513800  | 0.84310600  | H  | -5.44330000 | 0.81730400  | -0.28985400 |
| C                   | -0.69721500 | 2.31637300  | -0.38044500 | H  | -5.32326500 | -1.70428600 | -0.54363900 |
| C                   | -2.22410500 | -1.67475700 | 2.24939900  | H  | -4.20544300 | 2.97549500  | 0.02238000  |
| O                   | -1.80387600 | -0.45865900 | 2.39238900  | N  | -1.57791800 | 0.87418100  | 0.03476400  |
| O                   | -1.81054300 | -2.35082500 | 1.27041800  | Co | 0.57195200  | 0.70110700  | 0.21211600  |
| C                   | -3.18199700 | -2.22673100 | 3.26447000  | C  | 0.91421000  | 2.95153800  | -0.97429000 |
| H                   | -4.05928800 | -1.57570600 | 3.33019900  | O  | 0.99960000  | 2.74299600  | 0.29184300  |
| H                   | -3.48853100 | -3.23922300 | 2.99910500  | O  | 0.62401200  | 2.01023300  | -1.76075300 |
| H                   | -2.70126800 | -2.23197300 | 4.24826700  | C  | 1.17566300  | 4.34665000  | -1.48538600 |
| H                   | -0.79888000 | 1.76867700  | 1.73343800  | H  | 2.20598100  | 4.63174200  | -1.24768400 |
| H                   | -0.75280200 | 3.38535200  | -0.13423700 | H  | 1.02060000  | 4.40685800  | -2.56366300 |
| H                   | 0.02923900  | 2.21284500  | -1.19229500 | H  | 0.51425900  | 5.05407800  | -0.97523200 |
| C                   | 1.29485900  | 1.68340500  | 1.10118000  | C  | 0.76597100  | 2.43549000  | 3.51488100  |
| H                   | 1.85451400  | 1.29933300  | 0.23751200  | C  | 1.87102300  | 1.36108200  | 3.31288800  |
| H                   | 1.57447700  | 1.09465400  | 1.98398300  | C  | 1.12245600  | 0.16544300  | 2.77447500  |
| O                   | 1.59393100  | 3.07283700  | 1.31066100  | C  | -0.21135100 | 0.34201700  | 2.81765200  |
| H                   | 2.55182000  | 3.14473100  | 1.43365300  | C  | -0.58976700 | 1.68624000  | 3.38936800  |
|                     |             |             |             | H  | 0.84183000  | 3.19419500  | 2.73363400  |
|                     |             |             |             | H  | 2.36098200  | 1.09152900  | 4.25865700  |
|                     |             |             |             | H  | 2.66547300  | 1.69425100  | 2.63526200  |
|                     |             |             |             | H  | 1.61701100  | -0.75824000 | 2.49639200  |
|                     |             |             |             | H  | -0.94531800 | -0.41693900 | 2.56849700  |
|                     |             |             |             | H  | -1.07415000 | 1.54409400  | 4.36545700  |
|                     |             |             |             | H  | -1.31227200 | 2.22156500  | 2.76272300  |
|                     |             |             |             | H  | 0.86292800  | 2.94372000  | 4.47762300  |
|                     |             |             |             |    |             |             |             |
| INT1_cyclopentene_Q |             |             |             |    |             |             |             |
| C                   | 4.76938500  | -0.58091300 | -0.40502000 |    |             |             |             |
| C                   | 4.62955400  | -1.97658200 | -0.35861300 |    |             |             |             |
| C                   | 3.36349900  | -2.53534200 | -0.22630300 |    |             |             |             |
| C                   | 2.24584000  | -1.68858700 | -0.13313100 |    |             |             |             |
| C                   | 2.35355800  | -0.27780100 | -0.16581600 |    |             |             |             |
| C                   | 3.64603400  | 0.24778900  | -0.32124100 |    |             |             |             |
| H                   | 5.76131500  | -0.14577600 | -0.50510900 |    |             |             |             |

|                     |             |             |             |                     |             |             |             |
|---------------------|-------------|-------------|-------------|---------------------|-------------|-------------|-------------|
| INT1_cyclopentene_S |             |             |             | H                   | 2.15444000  | 0.55348600  | 4.31437200  |
| C                   | 4.62578700  | -0.01982200 | 0.02473800  | H                   | 2.85645500  | 1.13094400  | 2.80682300  |
| C                   | 4.63892900  | -1.38119200 | -0.29916500 | H                   | 1.32717200  | -1.05339200 | 2.42825600  |
| C                   | 3.43663900  | -2.08338000 | -0.38436800 | H                   | -1.12680000 | -0.26742500 | 2.43177700  |
| C                   | 2.23469700  | -1.41398700 | -0.13650100 | H                   | -0.90454400 | 1.57506800  | 4.26583600  |
| C                   | 2.21202500  | -0.05098800 | 0.20743200  | H                   | -1.06935700 | 2.42243300  | 2.73460300  |
| C                   | 3.41804000  | 0.64624600  | 0.27554000  | H                   | 1.18986500  | 2.76275200  | 4.38277700  |
| H                   | 5.56252700  | 0.52909700  | 0.08290200  | INT1_cyclopentene_T |             |             |             |
| H                   | 5.58166600  | -1.88622400 | -0.48840900 | C                   | 4.60316400  | -0.08198000 | 0.01654900  |
| H                   | 3.41696700  | -3.13819400 | -0.64563400 | C                   | 4.62977300  | -1.46989300 | -0.16483500 |
| H                   | 3.43190400  | 1.70439100  | 0.52224800  | C                   | 3.43647400  | -2.18260300 | -0.28222500 |
| C                   | 0.91055500  | -2.08065000 | -0.24079600 | C                   | 2.22413900  | -1.49202700 | -0.21274400 |
| O                   | 0.76046800  | -3.28214300 | -0.53843100 | C                   | 2.19514100  | -0.10277300 | -0.02565900 |
| N                   | -0.08903700 | -1.18829300 | 0.01351200  | C                   | 3.38600400  | 0.61064500  | 0.08399600  |
| C                   | -1.44893200 | -1.41453300 | -0.14599900 | H                   | 5.53664500  | 0.46731000  | 0.10671000  |
| C                   | -2.24590300 | -0.23040000 | -0.03445900 | H                   | 5.58154400  | -1.99038500 | -0.21435700 |
| C                   | -2.09989900 | -2.61786300 | -0.40553900 | H                   | 3.43191800  | -3.26014800 | -0.42311900 |
| C                   | -3.65702300 | -0.26487500 | -0.19690100 | H                   | 3.38152100  | 1.68703800  | 0.22711000  |
| C                   | -3.50500200 | -2.64745800 | -0.55914300 | C                   | 0.90071200  | -2.15615700 | -0.30568900 |
| H                   | -1.52317500 | -3.52686200 | -0.49516000 | O                   | 0.73855800  | -3.37691000 | -0.45263200 |
| C                   | -2.25157100 | 2.07434500  | 0.31178600  | N                   | -0.09667900 | -1.21750900 | -0.19298200 |
| C                   | -4.35005700 | 0.96795000  | -0.08673400 | C                   | -1.46815500 | -1.46996100 | -0.21637900 |
| C                   | -4.28051800 | -1.51068800 | -0.46272700 | C                   | -2.27071400 | -0.29027800 | -0.12590000 |
| H                   | -3.97872500 | -3.60362100 | -0.76233000 | C                   | -2.11665200 | -2.69545200 | -0.31447600 |
| C                   | -3.65217300 | 2.12982100  | 0.15804800  | C                   | -3.68853300 | -0.35096600 | -0.14187100 |
| H                   | -1.67086000 | 2.96998900  | 0.50554100  | C                   | -3.53096200 | -2.75316600 | -0.32931000 |
| H                   | -5.42988100 | 0.98114300  | -0.20281300 | H                   | -1.53579400 | -3.60368700 | -0.38280900 |
| H                   | -5.35783500 | -1.54966600 | -0.58873800 | C                   | -2.28418100 | 2.03613700  | 0.06905300  |
| H                   | -4.15651300 | 3.08610400  | 0.23943000  | C                   | -4.38851500 | 0.87776700  | -0.04632300 |
| N                   | -1.58039800 | 0.93638700  | 0.22869300  | C                   | -4.31285000 | -1.62110500 | -0.24764200 |
| Co                  | 0.41022300  | 0.60149500  | 0.36889100  | H                   | -4.00336800 | -3.72777200 | -0.40844400 |
| C                   | 0.87115700  | 2.43048600  | -1.01072200 | C                   | -3.69177000 | 2.06360900  | 0.05578400  |
| O                   | 0.90491400  | 2.53435200  | 0.26069900  | H                   | -1.69928100 | 2.94621900  | 0.15079400  |
| O                   | 0.57723900  | 1.26731800  | -1.46083800 | H                   | -5.47451800 | 0.87064900  | -0.05506300 |
| C                   | 1.18394500  | 3.57237800  | -1.91563300 | H                   | -5.39638200 | -1.68078600 | -0.26111300 |
| H                   | 2.27367300  | 3.66631000  | -1.98962500 | H                   | -4.20435200 | 3.01591200  | 0.12869700  |
| H                   | 0.77607900  | 3.39637000  | -2.91224700 | N                   | -1.60418400 | 0.90108300  | -0.01494400 |
| H                   | 0.78883500  | 4.50040300  | -1.49586600 | Co                  | 0.39907400  | 0.59819600  | 0.04819000  |
| C                   | 1.03096500  | 2.23412400  | 3.43995500  | C                   | 0.95311900  | 2.66959300  | -1.21449700 |
| C                   | 1.90920200  | 0.96431900  | 3.32445800  | O                   | 0.85030600  | 2.51267900  | 0.06320600  |
| C                   | 1.01532800  | -0.03860300 | 2.63805900  | O                   | 0.78011400  | 1.67630300  | -1.96697900 |
| C                   | -0.28218600 | 0.38077400  | 2.62893600  | C                   | 1.28813700  | 4.03487700  | -1.74130500 |
| C                   | -0.42714600 | 1.73187300  | 3.28826000  | H                   | 2.30479000  | 4.29547600  | -1.42775900 |
| H                   | 1.27038100  | 2.92181000  | 2.62669400  |                     |             |             |             |

|                   |             |             |             |                   |             |             |             |
|-------------------|-------------|-------------|-------------|-------------------|-------------|-------------|-------------|
| H                 | 1.22670900  | 4.05577000  | -2.82990700 | H                 | 3.58550700  | -3.67667000 | -0.48700900 |
| H                 | 0.60838400  | 4.77592400  | -1.31100800 | N                 | 1.53324700  | -1.04081100 | -0.19711500 |
| C                 | 1.10808900  | 2.17374300  | 3.38994400  | Co                | -0.29134600 | -0.36383700 | -0.02023300 |
| C                 | 1.89238600  | 0.83633700  | 3.38314800  | C                 | -1.13132200 | -1.74003100 | -1.78972300 |
| C                 | 0.91032200  | -0.14231300 | 2.78863700  | O                 | -1.13365400 | -2.07604900 | -0.55121300 |
| C                 | -0.33292500 | 0.36846600  | 2.72831900  | O                 | -0.64189500 | -0.60607700 | -2.08560800 |
| C                 | -0.38700300 | 1.77912100  | 3.26489700  | C                 | -1.72250400 | -2.64928600 | -2.82083600 |
| H                 | 1.39951300  | 2.76830500  | 2.52006000  | H                 | -2.81472700 | -2.57595200 | -2.76348000 |
| H                 | 2.15554900  | 0.51151400  | 4.40016400  | H                 | -1.39966000 | -2.35905000 | -3.82189300 |
| H                 | 2.82937800  | 0.89306400  | 2.81971500  | H                 | -1.44284900 | -3.68569000 | -2.61517600 |
| H                 | 1.17512100  | -1.16209800 | 2.53163300  | C                 | -2.02034100 | -2.03329200 | 2.43000800  |
| H                 | -1.21891600 | -0.18888200 | 2.44481100  | C                 | -2.44216900 | -0.56589600 | 2.61634400  |
| H                 | -0.89470200 | 1.78257500  | 4.24002200  | C                 | -1.33493400 | 0.23359600  | 1.95594700  |
| H                 | -0.95266000 | 2.45853300  | 2.61761100  | C                 | -0.14844100 | -0.57359300 | 1.93794500  |
| H                 | 1.30905900  | 2.77192000  | 4.28240700  | C                 | -0.47682700 | -1.97288700 | 2.44073500  |
| TS_cyclopentene_S |             |             |             | H                 | -2.37712400 | -2.40433200 | 1.46644100  |
| C                 | -4.22360000 | 1.09427500  | -0.78938400 | H                 | -2.37999400 | -0.29409300 | 3.68044600  |
| C                 | -3.88155600 | 2.41175400  | -1.11435500 | H                 | -3.45183500 | -0.33092100 | 2.27910400  |
| C                 | -2.58997200 | 2.87805500  | -0.86422700 | H                 | -1.24995600 | 1.28981300  | 2.18013500  |
| C                 | -1.65236000 | 2.02892200  | -0.27544200 | H                 | 0.80161600  | -0.12608900 | 2.21514500  |
| C                 | -1.99953400 | 0.70938500  | 0.09457100  | H                 | -0.09745600 | -2.06883400 | 3.46762600  |
| C                 | -3.29099400 | 0.24942700  | -0.18206100 | H                 | -0.01027200 | -2.76934500 | 1.85277500  |
| H                 | -5.22227900 | 0.72493000  | -1.00523000 | H                 | -2.42246500 | -2.68277700 | 3.21206400  |
| H                 | -4.61632500 | 3.06589300  | -1.57415200 | TS_cyclopentene_T |             |             |             |
| H                 | -2.29122600 | 3.88427100  | -1.14344800 | C                 | -4.28538600 | 0.87643200  | -0.71870000 |
| H                 | -3.57546100 | -0.76650700 | 0.07199700  | C                 | -4.06035100 | 2.24653100  | -0.88459200 |
| C                 | -0.22157600 | 2.43012300  | -0.14147300 | C                 | -2.81533400 | 2.79105000  | -0.56700600 |
| O                 | 0.17178900  | 3.60968000  | -0.24045700 | C                 | -1.79791900 | 1.96708800  | -0.07867700 |
| N                 | 0.55386200  | 1.33139800  | 0.03363200  | C                 | -2.04634200 | 0.59915100  | 0.13582400  |
| C                 | 1.94072500  | 1.29301300  | 0.02285100  | C                 | -3.28303000 | 0.05121000  | -0.19585200 |
| C                 | 2.45718900  | -0.03291400 | -0.10310400 | H                 | -5.24626800 | 0.44590800  | -0.98681500 |
| C                 | 2.84421400  | 2.34632600  | 0.11060100  | H                 | -4.84808600 | 2.88301800  | -1.27636400 |
| C                 | 3.85219100  | -0.29028100 | -0.13749300 | H                 | -2.60547100 | 3.84531200  | -0.72513700 |
| C                 | 4.23472900  | 2.08732900  | 0.07952500  | H                 | -3.47658100 | -1.00695900 | -0.04992000 |
| H                 | 2.47882600  | 3.35967500  | 0.19922700  | C                 | -0.40056600 | 2.47217200  | 0.08515500  |
| C                 | 1.93767300  | -2.29553500 | -0.32995000 | O                 | -0.12966700 | 3.68548700  | 0.19054400  |
| C                 | 4.25565400  | -1.64274200 | -0.27683600 | N                 | 0.46471700  | 1.42972300  | 0.03878200  |
| C                 | 4.74301900  | 0.81012300  | -0.04021500 | C                 | 1.84801000  | 1.49282500  | 0.05273700  |
| H                 | 4.91626500  | 2.92987600  | 0.15238700  | C                 | 2.48568100  | 0.21169400  | -0.08070200 |
| C                 | 3.30518000  | -2.63524000 | -0.37687100 | C                 | 2.66115600  | 2.61685400  | 0.16300800  |
| H                 | 1.16302400  | -3.05064400 | -0.40086300 | C                 | 3.90232300  | 0.09446300  | -0.10855700 |
| H                 | 5.31472500  | -1.88144200 | -0.30561700 | C                 | 4.06959400  | 2.49181500  | 0.13975200  |
| H                 | 5.81298300  | 0.63026100  | -0.06621600 | H                 | 2.20448200  | 3.59172200  | 0.26100100  |

|                     |             |             |             |                     |             |             |             |
|---------------------|-------------|-------------|-------------|---------------------|-------------|-------------|-------------|
| C                   | 2.21638700  | -2.09685300 | -0.32551200 | O                   | 0.08016500  | -2.86757300 | 0.51762900  |
| C                   | 4.44597100  | -1.20568000 | -0.25858200 | N                   | -0.62624100 | -0.86489500 | -0.44351000 |
| C                   | 4.69108700  | 1.26893800  | 0.00661900  | C                   | -2.00322200 | -1.11190800 | -0.43477000 |
| H                   | 4.66941000  | 3.39319000  | 0.22640200  | C                   | -2.83393100 | 0.03829500  | -0.67035700 |
| C                   | 3.60943300  | -2.29503500 | -0.37218400 | C                   | -2.64055300 | -2.33318500 | -0.23713500 |
| H                   | 1.52347800  | -2.92729700 | -0.40714600 | C                   | -4.25366100 | -0.07178000 | -0.69837800 |
| H                   | 5.52490400  | -1.32802400 | -0.28494800 | C                   | -4.05084000 | -2.43470400 | -0.26762800 |
| H                   | 5.77287300  | 1.18438600  | -0.01616200 | H                   | -2.04402900 | -3.21450600 | -0.05421300 |
| H                   | 3.99973800  | -3.29929800 | -0.49186000 | C                   | -2.94468400 | 2.33792600  | -1.07663100 |
| N                   | 1.67931300  | -0.89296400 | -0.18512300 | C                   | -4.99847800 | 1.11094600  | -0.93065900 |
| Co                  | -0.28443500 | -0.41178200 | -0.04224000 | C                   | -4.85427500 | -1.33941900 | -0.49114400 |
| C                   | -0.97998800 | -1.80303700 | -1.99452700 | H                   | -4.50103100 | -3.41031500 | -0.10853800 |
| O                   | -0.91519300 | -2.39150400 | -0.87517900 | C                   | -4.35047200 | 2.31222000  | -1.11905300 |
| O                   | -0.69950700 | -0.55670500 | -2.05974500 | H                   | -2.39643600 | 3.26385500  | -1.22199700 |
| C                   | -1.42321100 | -2.53311000 | -3.23192600 | H                   | -6.08291800 | 1.05393500  | -0.95646100 |
| H                   | -2.51572700 | -2.46671500 | -3.29836900 | H                   | -5.93629200 | -1.42307900 | -0.51079300 |
| H                   | -0.99767900 | -2.07490600 | -4.12702200 | H                   | -4.89669900 | 3.23120400  | -1.29835200 |
| H                   | -1.14745600 | -3.58821400 | -3.17529400 | N                   | -2.21986900 | 1.24736200  | -0.86103300 |
| C                   | -1.94609400 | -2.43527100 | 2.24069700  | Co                  | -0.16064600 | 1.06277000  | -0.77479200 |
| C                   | -2.46320400 | -1.03642300 | 2.62157500  | C                   | 1.68987200  | 2.65028900  | -0.97972900 |
| C                   | -1.37565800 | -0.10676400 | 2.13132400  | O                   | 1.14489200  | 2.45162300  | 0.15701200  |
| C                   | -0.17735300 | -0.82389200 | 2.03765300  | O                   | 1.21208400  | 2.05905700  | -2.00911700 |
| C                   | -0.41084500 | -2.29415400 | 2.32600300  | C                   | 2.90787900  | 3.51777900  | -1.10259800 |
| H                   | -2.23199500 | -2.66274200 | 1.21001600  | H                   | 3.78961000  | 2.87782300  | -0.98130100 |
| H                   | -2.46766100 | -0.91431700 | 3.71497700  | H                   | 2.95427100  | 3.98115500  | -2.09003500 |
| H                   | -3.46829300 | -0.80791400 | 2.26360000  | H                   | 2.92344000  | 4.27753100  | -0.31902800 |
| H                   | -1.36561200 | 0.93655800  | 2.42267100  | C                   | 2.41624900  | 0.98959900  | 3.94458700  |
| H                   | 0.77966900  | -0.35115100 | 2.23479100  | C                   | 2.53495100  | -0.53133700 | 3.73008100  |
| H                   | -0.04857900 | -2.49681200 | 3.34432600  | C                   | 1.65273300  | -0.83591500 | 2.49622900  |
| H                   | 0.12728300  | -2.96973900 | 1.65465300  | C                   | 0.58338900  | 0.22633500  | 2.60172600  |
| H                   | -2.34210100 | -3.22345300 | 2.88533800  | C                   | 0.95090300  | 1.30644500  | 3.56943200  |
| INT2_cyclopentene_Q |             |             |             | H                   | 3.09060800  | 1.52360600  | 3.26663800  |
| C                   | 4.25959000  | -0.11303800 | -0.26010500 | H                   | 2.10302700  | -1.05304400 | 4.59169100  |
| C                   | 3.59969200  | -0.56257600 | -1.40282200 | H                   | 3.56603800  | -0.88002300 | 3.62620100  |
| C                   | 2.31704400  | -1.09764900 | -1.28020100 | H                   | 1.21660100  | -1.83943400 | 2.56705400  |
| C                   | 1.69986900  | -1.19419100 | -0.02801600 | H                   | -0.34848600 | 0.19315300  | 2.04930400  |
| C                   | 2.36533400  | -0.75841600 | 1.13829500  | H                   | 0.30447400  | 1.26990400  | 4.46356100  |
| C                   | 3.64523500  | -0.21106700 | 0.99138300  | H                   | 0.82900900  | 2.31605800  | 3.15265000  |
| H                   | 5.25667500  | 0.31150600  | -0.33566900 | H                   | 2.66901800  | 1.29105800  | 4.96548400  |
| H                   | 4.07193200  | -0.49389400 | -2.37813300 | INT2_cyclopentene_S |             |             |             |
| H                   | 1.78067100  | -1.43700600 | -2.16215600 | C                   | 4.30948600  | -0.11873500 | -0.19904700 |
| H                   | 4.18233600  | 0.14669300  | 1.86205600  | C                   | 3.98627400  | -0.98414800 | -1.24906800 |
| C                   | 0.29234400  | -1.73626700 | 0.03832300  | C                   | 2.79478600  | -1.69888900 | -1.20604700 |





|   |             |             |            |
|---|-------------|-------------|------------|
| C | 1.43380700  | -0.73243700 | 2.29886000 |
| C | 0.20682600  | 0.18264400  | 2.12943300 |
| C | 0.37684700  | 1.42612900  | 2.99899200 |
| H | 2.49851700  | 1.83800200  | 2.78515900 |
| H | 1.58092500  | -0.57328800 | 4.44148300 |
| H | 3.15504500  | -0.41806500 | 3.66609900 |
| H | 1.08920400  | -1.75802900 | 2.46759400 |
| H | -0.75937600 | -0.31149900 | 2.20296400 |
| H | -0.33165700 | 1.35000200  | 3.83551300 |
| H | 0.14099700  | 2.36332700  | 2.48150000 |
| H | 1.95940700  | 1.85366400  | 4.46923300 |

INT1\_allene\_Q

|    |             |             |             |
|----|-------------|-------------|-------------|
| C  | 4.73888100  | -1.49307800 | -0.59120800 |
| C  | 4.20870900  | -2.70554300 | -1.06113700 |
| C  | 2.84297900  | -2.81483300 | -1.29044800 |
| C  | 2.01023500  | -1.71002200 | -1.03779600 |
| C  | 2.50948700  | -0.47693000 | -0.54449300 |
| C  | 3.90048400  | -0.40232100 | -0.34942100 |
| H  | 5.80877500  | -1.40983100 | -0.41406700 |
| H  | 4.86533600  | -3.54977200 | -1.25071700 |
| H  | 2.41326400  | -3.73841200 | -1.66776300 |
| H  | 4.34064400  | 0.52384500  | 0.01931600  |
| C  | 0.55729500  | -1.83769400 | -1.30426300 |
| O  | 0.02056500  | -2.87872500 | -1.69715900 |
| N  | -0.13280500 | -0.64470500 | -1.03584500 |
| C  | -1.43326700 | -0.42119600 | -1.26746500 |
| C  | -1.91442100 | 0.85424000  | -0.75722500 |
| C  | -2.36022100 | -1.26455000 | -1.93235800 |
| C  | -3.27693400 | 1.21541900  | -0.89254100 |
| C  | -3.69487600 | -0.87712700 | -2.07730600 |
| H  | -2.01725800 | -2.21419900 | -2.31519200 |
| C  | -1.42563600 | 2.80832400  | 0.38461000  |
| C  | -3.68904300 | 2.44277700  | -0.32651100 |
| C  | -4.16124600 | 0.32699200  | -1.56759800 |
| H  | -4.38189400 | -1.54289900 | -2.58921600 |
| C  | -2.76161900 | 3.23690000  | 0.32065100  |
| H  | -0.66686900 | 3.41011900  | 0.87544000  |
| H  | -4.72921600 | 2.74409500  | -0.40374500 |
| H  | -5.20479100 | 0.60628500  | -1.67338900 |
| H  | -3.04339400 | 4.18127500  | 0.77210800  |
| N  | -1.01552700 | 1.65589200  | -0.14094800 |
| Co | 1.01262800  | 0.85283100  | -0.11837700 |
| C  | -0.08285900 | -0.13221400 | 2.67094300  |

|   |             |             |             |
|---|-------------|-------------|-------------|
| C | 2.06556900  | 3.15308900  | -0.21039000 |
| O | 1.94063800  | 2.49749700  | 0.88327900  |
| O | 1.61071400  | 2.67527600  | -1.29263600 |
| C | 2.78918200  | 4.47534300  | -0.19631500 |
| H | 3.86752600  | 4.28466400  | -0.14806300 |
| H | 2.57433800  | 5.04890000  | -1.09967600 |
| H | 2.51278300  | 5.04968200  | 0.69168300  |
| H | -0.43794200 | 0.86882400  | 2.91499300  |
| C | -1.08874200 | -1.07089800 | 2.14417600  |
| C | -2.42392200 | -0.65259900 | 2.03715600  |
| C | -0.74693000 | -2.36326200 | 1.71091500  |
| C | -3.39506400 | -1.50495100 | 1.51246000  |
| H | -2.69352300 | 0.35073100  | 2.35577000  |
| C | -1.71555100 | -3.20957400 | 1.18009900  |
| H | 0.28643000  | -2.69089100 | 1.77737700  |
| C | -3.04464900 | -2.78494300 | 1.07891500  |
| H | -4.42192900 | -1.16242100 | 1.42684000  |
| H | -1.43170400 | -4.19835500 | 0.83220900  |
| H | -3.79766500 | -3.44395200 | 0.65738000  |
| C | 1.19299300  | -0.40790000 | 2.85234700  |
| C | 2.44809100  | -0.70178800 | 3.05415400  |
| H | 2.78944600  | -1.09908300 | 4.00975400  |
| H | 3.19612800  | -0.56570600 | 2.27509800  |

INT1\_allene\_S

|   |             |             |             |
|---|-------------|-------------|-------------|
| C | 4.77947700  | -1.05761700 | -0.24640400 |
| C | 4.44099200  | -2.22076100 | -0.94724500 |
| C | 3.11042200  | -2.45791700 | -1.29163900 |
| C | 2.13195100  | -1.53312900 | -0.91570100 |
| C | 2.45421400  | -0.38505400 | -0.17339600 |
| C | 3.79195100  | -0.14043300 | 0.13937200  |
| H | 5.81922400  | -0.86320200 | 0.00461800  |
| H | 5.21431000  | -2.92757900 | -1.23347800 |
| H | 2.82284600  | -3.33982100 | -1.85793300 |
| H | 4.07697300  | 0.74918400  | 0.69490400  |
| C | 0.70994100  | -1.65714000 | -1.32778600 |
| O | 0.25219100  | -2.62336400 | -1.96774900 |
| N | 0.01438700  | -0.55379800 | -0.93423300 |
| C | -1.30655100 | -0.26706700 | -1.23785600 |
| C | -1.77054100 | 0.96212200  | -0.67093900 |
| C | -2.20090300 | -1.01656600 | -1.99589400 |
| C | -3.09961200 | 1.42167700  | -0.87487300 |
| C | -3.52354500 | -0.55749900 | -2.19146900 |
| H | -1.88162100 | -1.95587100 | -2.42199400 |

|               |             |             |             |    |             |             |             |
|---------------|-------------|-------------|-------------|----|-------------|-------------|-------------|
| C             | -1.24835600 | 2.79161200  | 0.67462000  | H  | 4.90410900  | -3.35208400 | -1.07127100 |
| C             | -3.46255000 | 2.64241800  | -0.25352100 | H  | 2.49707200  | -3.65542400 | -1.69932600 |
| C             | -3.97956400 | 0.62844400  | -1.65471100 | H  | 4.06897700  | 0.65497800  | 0.26145200  |
| H             | -4.19658500 | -1.17077400 | -2.78376600 | C  | 0.51886900  | -1.74565200 | -1.43180700 |
| C             | -2.54257400 | 3.32478200  | 0.51359800  | O  | -0.03245500 | -2.74956100 | -1.90411900 |
| H             | -0.50272500 | 3.29443400  | 1.28218400  | N  | -0.09167200 | -0.54725500 | -1.14981700 |
| H             | -4.47068900 | 3.02476800  | -0.38449600 | C  | -1.44842700 | -0.26547300 | -1.31622100 |
| H             | -4.99905300 | 0.96511400  | -1.81340400 | C  | -1.85352700 | 0.97543600  | -0.73772200 |
| H             | -2.79580900 | 4.25849200  | 1.00303000  | C  | -2.41002500 | -1.03383200 | -1.95844600 |
| N             | -0.88130500 | 1.65389400  | 0.10309100  | C  | -3.20329100 | 1.41203900  | -0.78413500 |
| Co            | 0.90515100  | 0.70069300  | 0.16700000  | C  | -3.75268800 | -0.58941200 | -2.01778400 |
| C             | -0.24707600 | -0.22582000 | 2.14423900  | H  | -2.13337100 | -1.97999000 | -2.39910800 |
| C             | 2.05746000  | 2.68373500  | -0.20051400 | C  | -1.19621400 | 2.85025700  | 0.48716800  |
| O             | 1.88260700  | 2.22442500  | 0.97859300  | C  | -3.50838600 | 2.63438200  | -0.13805200 |
| O             | 1.56529300  | 1.96696700  | -1.14415400 | C  | -4.15820700 | 0.59668900  | -1.44624700 |
| C             | 2.80904100  | 3.93897400  | -0.47545200 | H  | -4.47893200 | -1.21825300 | -2.52399500 |
| H             | 3.87506300  | 3.69301700  | -0.54750800 | C  | -2.51261600 | 3.34662500  | 0.49927900  |
| H             | 2.48709400  | 4.37709600  | -1.42186000 | H  | -0.38653200 | 3.38119000  | 0.97673300  |
| H             | 2.67200700  | 4.64622500  | 0.34509800  | H  | -4.53200100 | 2.99714000  | -0.14624200 |
| H             | -0.57488800 | 0.75858700  | 2.47117200  | H  | -5.19331900 | 0.91970300  | -1.48929300 |
| C             | -1.30232500 | -1.16949200 | 1.74812600  | H  | -2.72304000 | 4.28065700  | 1.00752400  |
| C             | -2.63678500 | -0.73692100 | 1.77297900  | N  | -0.88064200 | 1.71171800  | -0.11674500 |
| C             | -1.00837600 | -2.47425800 | 1.32061500  | Co | 0.91328100  | 0.77748200  | -0.25057200 |
| C             | -3.66208100 | -1.59166900 | 1.37163900  | C  | -0.08840100 | -0.27758300 | 2.58320400  |
| H             | -2.86134600 | 0.27588100  | 2.09471000  | C  | 2.28776300  | 2.82017200  | -0.14257000 |
| C             | -2.03145800 | -3.31947200 | 0.90545900  | O  | 1.88687700  | 2.10501900  | 0.85229900  |
| H             | 0.02369600  | -2.80884000 | 1.29387400  | O  | 1.97946700  | 2.44938000  | -1.30940800 |
| C             | -3.36050400 | -2.88053100 | 0.92836000  | C  | 3.12252000  | 4.03844900  | 0.11744300  |
| H             | -4.69080900 | -1.24545700 | 1.38829700  | H  | 4.15295000  | 3.71889100  | 0.31119200  |
| H             | -1.79484600 | -4.32040400 | 0.55757900  | H  | 3.11643800  | 4.70060300  | -0.74955900 |
| H             | -4.15593700 | -3.54167100 | 0.59752900  | H  | 2.76138100  | 4.56473900  | 1.00407300  |
| C             | 1.04846900  | -0.52953100 | 2.28952100  | H  | -0.37049600 | 0.74323500  | 2.84083500  |
| C             | 2.16613400  | -0.96110300 | 2.81201900  | C  | -1.15773300 | -1.13339700 | 2.04049400  |
| H             | 2.14181200  | -1.33841300 | 3.83461000  | C  | -2.47679200 | -0.65462100 | 2.02780700  |
| H             | 3.11642100  | -0.96507600 | 2.29341500  | C  | -0.89427300 | -2.40911100 | 1.51370400  |
|               |             |             |             | C  | -3.51298800 | -1.44059200 | 1.52335000  |
| INT1_allene_T |             |             |             | H  | -2.68400700 | 0.33968500  | 2.41422300  |
| C             | 4.62270900  | -1.32711000 | -0.38525100 | C  | -1.92609900 | -3.18479300 | 0.99421100  |
| C             | 4.19276400  | -2.54474900 | -0.92513800 | H  | 0.12667100  | -2.77917100 | 1.50012500  |
| C             | 2.85435500  | -2.72024500 | -1.27675800 | C  | -3.24148500 | -2.70709100 | 1.00384400  |
| C             | 1.95874600  | -1.66694700 | -1.08009100 | H  | -4.52835600 | -1.05581700 | 1.52090900  |
| C             | 2.38264000  | -0.45065500 | -0.52617900 | H  | -1.70415000 | -4.16080000 | 0.57286400  |
| C             | 3.72005700  | -0.27361400 | -0.17963100 | H  | -4.04469400 | -3.31336100 | 0.59578300  |
| H             | 5.66730800  | -1.19615200 | -0.11570600 | C  | 1.15827400  | -0.65284500 | 2.78523300  |

|             |             |             |             |
|-------------|-------------|-------------|-------------|
| C           | 2.37933100  | -1.05016100 | 3.01581300  |
| H           | 2.66038700  | -1.48205900 | 3.97609600  |
| H           | 3.15883700  | -0.96665800 | 2.26077300  |
| TS_allene_S |             |             |             |
| C           | 4.90829100  | -0.51612700 | 0.36930400  |
| C           | 3.72361100  | 0.10396200  | 0.77251800  |
| C           | 2.50164100  | -0.34799400 | 0.26617900  |
| C           | 2.47823100  | -1.41684600 | -0.65160700 |
| C           | 3.66342100  | -2.04466800 | -1.04072500 |
| C           | 4.87902800  | -1.59658100 | -0.52301700 |
| H           | 5.85906500  | -0.16540000 | 0.76098900  |
| H           | 3.75140700  | 0.91969100  | 1.48827600  |
| H           | 3.62236400  | -2.86495800 | -1.75153200 |
| H           | 5.80562400  | -2.08053500 | -0.81697600 |
| C           | 1.15708500  | -1.77652000 | -1.23704900 |
| O           | 0.97152900  | -2.78093400 | -1.95187100 |
| N           | 0.23320000  | -0.83522800 | -0.91637300 |
| C           | -1.07073800 | -0.76497100 | -1.38040000 |
| C           | -1.72143600 | 0.45456000  | -1.02283400 |
| C           | -1.79163400 | -1.70988300 | -2.10137200 |
| C           | -3.07496800 | 0.70597600  | -1.36564600 |
| C           | -3.14054500 | -1.45678500 | -2.44250700 |
| H           | -1.32089600 | -2.64072200 | -2.38336000 |
| C           | -1.51430000 | 2.50850700  | 0.06203600  |
| C           | -3.62565200 | 1.94390700  | -0.94845200 |
| C           | -3.78331800 | -0.28818300 | -2.08880200 |
| H           | -3.68153400 | -2.21789300 | -2.99729600 |
| C           | -2.84799400 | 2.84132800  | -0.24896400 |
| H           | -0.88024500 | 3.17977800  | 0.63090200  |
| H           | -4.66074600 | 2.17149400  | -1.18551100 |
| H           | -4.82016800 | -0.11197500 | -2.35658200 |
| H           | -3.24399100 | 3.79530300  | 0.08009000  |
| N           | -0.97727300 | 1.35682200  | -0.31147100 |
| Co          | 0.79250000  | 0.62321900  | 0.15259100  |
| O           | 1.49409000  | 2.31572100  | 0.87837500  |
| O           | 1.66939300  | 1.85779100  | -1.23985900 |
| C           | 1.16567900  | -0.75288200 | 1.85034500  |
| C           | 1.78239500  | -1.79157800 | 2.38190200  |
| H           | 2.66659100  | -2.26578500 | 1.97733300  |
| C           | 0.00612200  | 0.00314400  | 1.94978400  |
| H           | 1.36941200  | -2.18677700 | 3.31014000  |
| C           | -1.34608500 | -0.58892300 | 1.90523800  |
| C           | -2.44000300 | 0.21583600  | 2.26492900  |

|   |             |             |             |
|---|-------------|-------------|-------------|
| C | -1.58427600 | -1.90518900 | 1.48021400  |
| C | -3.74148300 | -0.27059600 | 2.17047200  |
| H | -2.26154300 | 1.23351700  | 2.59905800  |
| C | -2.88675500 | -2.38933000 | 1.38485400  |
| H | -0.74863500 | -2.53690600 | 1.19896200  |
| C | -3.97075300 | -1.57301900 | 1.71926900  |
| H | -4.57665900 | 0.36902300  | 2.44055800  |
| H | -3.05675500 | -3.40436800 | 1.03802700  |
| H | -4.98528400 | -1.95056300 | 1.63280000  |
| C | 1.89326000  | 2.67336600  | -0.28788500 |
| C | 2.61413100  | 3.96434800  | -0.49474100 |
| H | 2.18723000  | 4.74165200  | 0.14342100  |
| H | 3.66282200  | 3.82410600  | -0.20733200 |
| H | 2.57304300  | 4.26285400  | -1.54351800 |
| H | 0.07209100  | 0.96062500  | 2.46507600  |

|             |             |             |             |
|-------------|-------------|-------------|-------------|
| TS_allene_T |             |             |             |
| C           | 4.87596300  | -0.61754100 | 0.31690900  |
| C           | 3.71101200  | 0.00625900  | 0.75660800  |
| C           | 2.46383600  | -0.44626400 | 0.29116900  |
| C           | 2.39352200  | -1.50863700 | -0.64871700 |
| C           | 3.56555400  | -2.14536300 | -1.05076900 |
| C           | 4.80001900  | -1.70742400 | -0.56204300 |
| H           | 5.84256500  | -0.27833100 | 0.67734300  |
| H           | 3.75416800  | 0.82205900  | 1.47125900  |
| H           | 3.50492600  | -2.96144200 | -1.76462200 |
| H           | 5.71098100  | -2.20662900 | -0.87845800 |
| C           | 1.06604600  | -1.85935100 | -1.24767000 |
| O           | 0.87198500  | -2.93903600 | -1.84218300 |
| N           | 0.18855200  | -0.84256100 | -1.06795900 |
| C           | -1.14880900 | -0.82557000 | -1.42756500 |
| C           | -1.84129800 | 0.37929500  | -1.05062300 |
| C           | -1.87761800 | -1.82851600 | -2.05761700 |
| C           | -3.23310000 | 0.52921400  | -1.29766100 |
| C           | -3.26164000 | -1.67033200 | -2.29798900 |
| H           | -1.37520600 | -2.74004300 | -2.34951100 |
| C           | -1.72039400 | 2.48162500  | -0.03974400 |
| C           | -3.84160800 | 1.74043000  | -0.88497300 |
| C           | -3.93870500 | -0.52803100 | -1.92962700 |
| H           | -3.79776800 | -2.48016700 | -2.78418500 |
| C           | -3.08895000 | 2.71723800  | -0.26946700 |
| H           | -1.09767500 | 3.21192500  | 0.46691800  |
| H           | -4.90436600 | 1.88352100  | -1.05781600 |
| H           | -5.00163900 | -0.41596200 | -2.11871100 |

|               |             |             |             |               |             |             |             |
|---------------|-------------|-------------|-------------|---------------|-------------|-------------|-------------|
| H             | -3.53063300 | 3.65302000  | 0.05386400  | C             | 1.81382600  | 3.01103900  | -0.22585000 |
| N             | -1.12420200 | 1.35937700  | -0.41445900 | C             | 3.50781500  | 0.91968600  | -1.05386200 |
| Co            | 0.77077300  | 0.71409300  | 0.00575800  | C             | 3.21586400  | 3.18540200  | -0.28630200 |
| O             | 1.42874000  | 2.66748800  | 0.81062600  | H             | 1.18552600  | 3.82604600  | 0.10098100  |
| O             | 1.76569200  | 2.06705300  | -1.27638500 | C             | 2.29736800  | -1.49219900 | -1.67153400 |
| C             | 1.44203100  | -0.75683500 | 1.72639200  | C             | 4.29711000  | -0.19082500 | -1.44215400 |
| C             | 1.97461100  | -1.81174900 | 2.33793100  | C             | 4.05919200  | 2.17440500  | -0.68878500 |
| H             | 2.82463200  | -2.35822000 | 1.94810100  | H             | 3.62719800  | 4.14931000  | -0.00041000 |
| C             | 0.26066400  | 0.02242100  | 1.96577900  | C             | 3.69922800  | -1.39513600 | -1.74213600 |
| H             | 1.55704900  | -2.13493400 | 3.29083600  | H             | 1.78502200  | -2.42200600 | -1.89906900 |
| C             | -1.08340600 | -0.53217900 | 1.99962100  | H             | 5.37668400  | -0.07943700 | -1.48588900 |
| C             | -2.14606300 | 0.28993900  | 2.43355400  | H             | 5.13488400  | 2.31374600  | -0.72792600 |
| C             | -1.37438300 | -1.84250500 | 1.56593500  | H             | 4.28182200  | -2.26379000 | -2.02675000 |
| C             | -3.45499000 | -0.17497500 | 2.41324300  | N             | 1.53210900  | -0.46404900 | -1.32998000 |
| H             | -1.92908900 | 1.30157800  | 2.76326100  | Co            | -0.51057900 | -0.43394200 | -1.08539700 |
| C             | -2.68661700 | -2.30173100 | 1.54771100  | C             | -0.75754500 | -0.91103700 | 2.07261000  |
| H             | -0.57073800 | -2.48119700 | 1.21709900  | C             | -2.31596700 | -2.03973400 | -1.56522000 |
| C             | -3.73263300 | -1.47036800 | 1.96101700  | O             | -1.36745400 | -2.37295600 | -0.77894700 |
| H             | -4.26295800 | 0.47305300  | 2.73909800  | O             | -2.25475100 | -0.91630300 | -2.17167600 |
| H             | -2.89803800 | -3.30626800 | 1.19411700  | C             | -3.51642100 | -2.92474800 | -1.73626300 |
| H             | -4.75711500 | -1.82869800 | 1.93088500  | H             | -4.28298600 | -2.59383900 | -1.02569400 |
| C             | 1.87904500  | 2.93585600  | -0.34679500 | H             | -3.92481000 | -2.82901300 | -2.74447200 |
| C             | 2.57388300  | 4.24155500  | -0.61684400 | H             | -3.26775100 | -3.96512600 | -1.51970900 |
| H             | 2.19042100  | 5.02466800  | 0.04055900  | H             | -1.45708500 | -1.68973100 | 1.78148600  |
| H             | 3.64314700  | 4.11291400  | -0.41074300 | C             | 0.61845700  | -1.30603800 | 2.08311200  |
| H             | 2.46038800  | 4.53169400  | -1.66339800 | C             | 0.92191900  | -2.68405600 | 1.90312700  |
| H             | 0.38845600  | 1.01641400  | 2.39249900  | C             | 1.70993500  | -0.39823000 | 2.13223500  |
|               |             |             |             | C             | 2.23211500  | -3.12528400 | 1.78474900  |
| INT2_allene_Q |             |             |             | H             | 0.10147200  | -3.39395200 | 1.84283200  |
| C             | -4.78549800 | 0.20399700  | 0.62699100  | C             | 3.01819500  | -0.84930300 | 2.01142400  |
| C             | -4.69654400 | 1.16353000  | -0.38503200 | H             | 1.52159400  | 0.66480000  | 2.20767100  |
| C             | -3.50737800 | 1.86818100  | -0.56759700 | C             | 3.29281200  | -2.21085300 | 1.83801100  |
| C             | -2.39805800 | 1.60513100  | 0.24293400  | H             | 2.43342100  | -4.18323900 | 1.64172800  |
| C             | -2.49431800 | 0.66661500  | 1.29063000  | H             | 3.83214600  | -0.13062800 | 2.02917700  |
| C             | -3.69402500 | -0.03529700 | 1.46300500  | H             | 4.31755500  | -2.55366400 | 1.73264600  |
| H             | -5.70887300 | -0.34838900 | 0.77491200  | C             | -1.30295000 | 0.41395200  | 2.16594600  |
| H             | -5.54737700 | 1.35697800  | -1.03140500 | C             | -0.80378900 | 1.42937200  | 2.92205500  |
| H             | -3.42109600 | 2.60542200  | -1.36094400 | H             | 0.03135600  | 1.28320700  | 3.59753500  |
| H             | -3.77347800 | -0.76438200 | 2.26452200  | H             | -1.26265700 | 2.41239200  | 2.90507900  |
| C             | -1.08763900 | 2.29858000  | -0.03668300 |               |             |             |             |
| O             | -0.99073700 | 3.52740100  | 0.14862100  | INT2_allene_S |             |             |             |
| N             | -0.12628200 | 1.45457500  | -0.48345500 | C             | 4.78307000  | -0.52168900 | 0.60107600  |
| C             | 1.22376400  | 1.79784000  | -0.57135400 | C             | 4.77430700  | -0.82876300 | -0.76529900 |
| C             | 2.09683400  | 0.73882700  | -1.00414200 | C             | 3.60922800  | -1.29119400 | -1.36893700 |

|    |             |             |             |               |             |             |             |
|----|-------------|-------------|-------------|---------------|-------------|-------------|-------------|
| C  | 2.43714300  | -1.44288200 | -0.61611200 | H             | -4.02287900 | 0.84892600  | 3.05904900  |
| C  | 2.44708100  | -1.17463000 | 0.77689700  | H             | -3.63227200 | -2.82630100 | 0.85687500  |
| C  | 3.63473100  | -0.70473900 | 1.36576400  | H             | -5.07142400 | -1.14694100 | 1.99979400  |
| H  | 5.69154600  | -0.15618600 | 1.06981500  | C             | 1.23111300  | -1.46080600 | 1.61912700  |
| H  | 5.67509000  | -0.69785400 | -1.35712400 | C             | 1.10418400  | -2.64866200 | 2.22137400  |
| H  | 3.58658100  | -1.51967600 | -2.43011300 | H             | 0.23600100  | -2.88925500 | 2.82722800  |
| H  | 3.64798300  | -0.50590800 | 2.43303700  | H             | 1.87302100  | -3.41047600 | 2.12428300  |
| C  | 1.14989500  | -1.77628000 | -1.32883400 |               |             |             |             |
| O  | 1.02961600  | -2.75415000 | -2.08696300 | INT2_allene_T |             |             |             |
| N  | 0.23521000  | -0.82253700 | -1.06742500 | C             | -4.97872700 | 0.06406900  | 0.88593100  |
| C  | -1.07168300 | -0.74103000 | -1.52317300 | C             | -5.00602200 | 0.89062200  | -0.24065400 |
| C  | -1.70954800 | 0.45660800  | -1.08929300 | C             | -3.85884600 | 1.58740200  | -0.61674900 |
| C  | -1.80566100 | -1.64766400 | -2.27469100 | C             | -2.67131000 | 1.44345100  | 0.11011200  |
| C  | -3.06815600 | 0.73197800  | -1.37858100 | C             | -2.64802700 | 0.63256700  | 1.26214700  |
| C  | -3.16427100 | -1.37568100 | -2.56424800 | C             | -3.80831000 | -0.05586200 | 1.63599800  |
| H  | -1.34264100 | -2.56196600 | -2.62028100 | H             | -5.87055500 | -0.47782900 | 1.18675700  |
| C  | -1.46031200 | 2.44867500  | 0.11075900  | H             | -5.91777700 | 0.99209200  | -0.82166500 |
| C  | -3.59934800 | 1.94822900  | -0.88081500 | H             | -3.86923200 | 2.23623800  | -1.48782000 |
| C  | -3.79519600 | -0.22623700 | -2.13223200 | H             | -3.79183500 | -0.67984400 | 2.52513400  |
| H  | -3.72231200 | -2.10446400 | -3.14452100 | C             | -1.43891300 | 2.19115000  | -0.33874700 |
| C  | -2.79684300 | 2.80254100  | -0.15440500 | O             | -1.49220900 | 3.43427300  | -0.41947100 |
| H  | -0.80813100 | 3.07687900  | 0.70522400  | N             | -0.37880300 | 1.39603000  | -0.62551700 |
| H  | -4.63873300 | 2.19449800  | -1.07602500 | C             | 0.92219300  | 1.87657000  | -0.79316500 |
| H  | -4.83818100 | -0.03698800 | -2.36434500 | C             | 1.92979700  | 0.87149800  | -1.01380400 |
| H  | -3.17760100 | 3.73885600  | 0.23674500  | C             | 1.34845400  | 3.19975400  | -0.70490400 |
| N  | -0.94477400 | 1.31370100  | -0.34298400 | C             | 3.30644000  | 1.22099100  | -1.11527200 |
| Co | 0.76686900  | 0.61939900  | 0.02385100  | C             | 2.71682300  | 3.53771500  | -0.81339900 |
| C  | 0.24413300  | -0.33614300 | 1.67441000  | H             | 0.61574600  | 3.97626600  | -0.54505600 |
| C  | 2.01799000  | 2.70510700  | -0.18032700 | C             | 2.42485100  | -1.40013800 | -1.24552300 |
| O  | 1.48309700  | 2.21827600  | 0.88888500  | C             | 4.23779000  | 0.16762400  | -1.29194000 |
| O  | 1.88060300  | 2.07037400  | -1.26553100 | C             | 3.68799800  | 2.58305700  | -1.01392700 |
| C  | 2.79739400  | 3.98238400  | -0.08873600 | H             | 2.99645000  | 4.58423500  | -0.73142400 |
| H  | 3.74237100  | 3.78178500  | 0.42860200  | C             | 3.80367700  | -1.13783800 | -1.35341700 |
| H  | 3.00952100  | 4.37850500  | -1.08271800 | H             | 2.03966400  | -2.41383400 | -1.28623600 |
| H  | 2.24323800  | 4.71612800  | 0.50304300  | H             | 5.29450300  | 0.40743700  | -1.36840300 |
| H  | 0.57074800  | 0.43949300  | 2.37590100  | H             | 4.73781500  | 2.84770200  | -1.09203400 |
| C  | -1.19893400 | -0.63905400 | 1.83558400  | H             | 4.49717100  | -1.96168200 | -1.47752100 |
| C  | -2.02508800 | 0.28912200  | 2.49404600  | N             | 1.53065300  | -0.43498900 | -1.08942600 |
| C  | -1.80552900 | -1.77083500 | 1.26110700  | Co            | -0.52200900 | -0.60017400 | -0.80739400 |
| C  | -3.40583900 | 0.11143200  | 2.55339100  | C             | -0.68503200 | -0.74513200 | 1.88417400  |
| H  | -1.57262200 | 1.16947400  | 2.94309000  | C             | -1.53717300 | -2.66624300 | -1.73027900 |
| C  | -3.18607600 | -1.95177300 | 1.32179800  | O             | -0.64758300 | -2.78798000 | -0.83232400 |
| H  | -1.19237700 | -2.50069300 | 0.74610800  | O             | -1.89123300 | -1.48847000 | -2.09282600 |
| C  | -3.99478100 | -1.00897000 | 1.96103300  | C             | -2.14145100 | -3.86971500 | -2.39552000 |

|     |             |             |             |     |             |             |             |
|-----|-------------|-------------|-------------|-----|-------------|-------------|-------------|
| H   | -2.08010400 | -4.74387900 | -1.74484700 | C   | 4.16535000  | -2.28665900 | -0.70840100 |
| H   | -3.17868800 | -3.67298700 | -2.67521200 | H   | 3.60744800  | -3.77667400 | -2.13938300 |
| H   | -1.57710600 | -4.07902900 | -3.31200200 | C   | 4.09662600  | 0.60281800  | 1.66263000  |
| H   | -1.30257100 | -1.59267800 | 1.59049500  | H   | 2.32484300  | 1.80874100  | 2.04203300  |
| C   | 0.71033300  | -1.03680300 | 2.09056200  | H   | 5.63526300  | -0.74588400 | 1.00913100  |
| C   | 1.12212500  | -2.39433100 | 2.08319800  | H   | 5.20803800  | -2.58470500 | -0.66146800 |
| C   | 1.71701800  | -0.04207000 | 2.17729900  | H   | 4.72938300  | 1.18455200  | 2.32257400  |
| C   | 2.46377600  | -2.73847800 | 2.17818700  | N   | 1.91297900  | 0.27929700  | 0.73383000  |
| H   | 0.36618300  | -3.16878200 | 1.99022500  | Co  | 0.05659800  | 1.03831900  | 0.20494800  |
| C   | 3.05777900  | -0.39474100 | 2.26654700  | O   | -0.40100100 | 0.44072000  | -3.02808100 |
| H   | 1.44610500  | 1.00399600  | 2.11221900  | O   | 0.82386800  | 1.53666100  | -1.49520800 |
| C   | 3.44169000  | -1.74053900 | 2.27169400  | C   | 0.34201500  | 1.37991500  | -2.70197800 |
| H   | 2.75387000  | -3.78510600 | 2.16985900  | O   | -1.66949000 | 2.31191800  | -0.43368800 |
| H   | 3.81277800  | 0.38468200  | 2.30899300  | O   | -0.00512800 | 3.01178000  | 0.81639500  |
| H   | 4.49216600  | -2.00846300 | 2.33152800  | C   | -1.12006400 | 3.24791700  | 0.21720700  |
| C   | -1.38146400 | 0.49762300  | 2.05746000  | O   | -0.96283800 | 0.19642600  | 1.54111900  |
| C   | -0.98527300 | 1.53321100  | 2.84789400  | O   | 0.09445200  | 0.96042700  | 3.37559800  |
| H   | -0.11116900 | 1.47117700  | 3.48542600  | C   | -0.70788900 | 0.19834200  | 2.83861700  |
| H   | -1.57510300 | 2.44263500  | 2.89937900  | C   | -1.48981600 | -0.84865800 | 3.59280800  |
| A_Q |             |             |             | H   | -1.13610600 | -1.83762300 | 3.28209100  |
| C   | -4.19412900 | -0.85539400 | -1.33177700 | H   | -1.35335700 | -0.72882400 | 4.66838300  |
| C   | -5.02656400 | -1.69169200 | -0.58473300 | H   | -2.55044900 | -0.78527100 | 3.33372400  |
| C   | -4.47169800 | -2.60965500 | 0.31149000  | C   | -1.74096300 | 4.60785600  | 0.32586600  |
| C   | -3.09054300 | -2.68564400 | 0.46089700  | H   | -0.98098500 | 5.37867200  | 0.17386500  |
| C   | -2.24930800 | -1.84713100 | -0.28649800 | H   | -2.55001300 | 4.72212900  | -0.39667600 |
| C   | -2.80955100 | -0.92907400 | -1.18770300 | H   | -2.14125600 | 4.72809800  | 1.33877000  |
| H   | -4.62219000 | -0.14197400 | -2.02923100 | C   | 0.76057400  | 2.44144100  | -3.68557200 |
| H   | -6.10451000 | -1.62943500 | -0.70118300 | H   | 0.27033300  | 3.38218500  | -3.41031100 |
| H   | -5.11533800 | -3.26267400 | 0.89290700  | H   | 1.84051900  | 2.60370800  | -3.62884200 |
| H   | -2.64607400 | -3.38972900 | 1.15525800  | H   | 0.47089400  | 2.16324300  | -4.69970000 |
| H   | -2.18620300 | -0.26851700 | -1.77895500 | A_S |             |             |             |
| C   | -0.78817300 | -1.97226900 | -0.04385900 | C   | 4.24367400  | -0.87645100 | 1.43513000  |
| N   | 0.07077900  | -1.13658100 | -0.78020300 | C   | 5.12702000  | -1.31447600 | 0.44692300  |
| H   | -0.26873900 | -0.78071200 | -1.68917700 | C   | 4.63596800  | -1.91551700 | -0.71677900 |
| O   | -0.32246200 | -2.74793700 | 0.78703400  | C   | 3.26615800  | -2.07974700 | -0.88656000 |
| C   | 1.45912000  | -1.51422100 | -0.79636700 | C   | 2.37265800  | -1.63147000 | 0.10085300  |
| C   | 2.36326100  | -0.79886400 | 0.02498600  | C   | 2.86839700  | -1.02563600 | 1.26511900  |
| C   | 1.91304800  | -2.56508200 | -1.56247500 | H   | 4.62415800  | -0.41348600 | 2.34024200  |
| C   | 3.73004500  | -1.19595700 | 0.08617600  | H   | 6.19719200  | -1.18824700 | 0.58189900  |
| C   | 3.27456600  | -2.94641600 | -1.52545800 | H   | 5.32146100  | -2.25396900 | -1.48746300 |
| H   | 1.21055400  | -3.10927200 | -2.18564100 | H   | 2.86923800  | -2.54302300 | -1.78300800 |
| C   | 2.74173000  | 0.95547200  | 1.51866100  | H   | 2.20036800  | -0.67152100 | 2.04097500  |
| C   | 4.58974500  | -0.46098000 | 0.94007000  | C   | 0.93291300  | -1.84266200 | -0.16256100 |

|     |             |             |             |    |             |             |             |
|-----|-------------|-------------|-------------|----|-------------|-------------|-------------|
| N   | -0.00498400 | -1.05471800 | 0.60525900  | C  | -5.05560600 | -1.59729000 | -0.64669600 |
| H   | 0.28195500  | -0.84307300 | 1.59674700  | C  | -4.51445300 | -2.47205000 | 0.29974200  |
| O   | 0.51476000  | -2.62053500 | -1.00348300 | C  | -3.13445300 | -2.56722300 | 0.44744100  |
| C   | -1.36634700 | -1.55153000 | 0.57667800  | C  | -2.28015400 | -1.78895900 | -0.34923500 |
| C   | -2.32239900 | -0.68983200 | 0.00981000  | C  | -2.82698900 | -0.91401900 | -1.30015900 |
| C   | -1.74749200 | -2.77825800 | 1.06768600  | H  | -4.62800200 | -0.14333400 | -2.18100700 |
| C   | -3.68796200 | -1.07090900 | -0.07318800 | H  | -6.13263900 | -1.52174600 | -0.76373200 |
| C   | -3.10596800 | -3.17098300 | 0.99104800  | H  | -5.16773800 | -3.07815300 | 0.91988600  |
| H   | -1.00856700 | -3.44278700 | 1.50300100  | H  | -2.70060700 | -3.24203000 | 1.17652000  |
| C   | -2.74716000 | 1.39480000  | -0.94450000 | H  | -2.19504400 | -0.29841900 | -1.92927900 |
| C   | -4.58617900 | -0.13460300 | -0.64348300 | C  | -0.81992400 | -1.94373000 | -0.11617500 |
| C   | -4.05673000 | -2.34433100 | 0.43028700  | N  | 0.05158400  | -1.13579700 | -0.85734600 |
| H   | -3.39326100 | -4.14179200 | 1.38082700  | H  | -0.28082700 | -0.71851400 | -1.73829600 |
| C   | -4.11711600 | 1.08732100  | -1.07361100 | O  | -0.36679200 | -2.72537500 | 0.71800500  |
| H   | -2.34867300 | 2.35151200  | -1.25684400 | C  | 1.43677200  | -1.51046700 | -0.85104900 |
| H   | -5.63830700 | -0.38894400 | -0.72717900 | C  | 2.31644900  | -0.77980000 | -0.01917300 |
| H   | -5.09614300 | -2.65112200 | 0.37160000  | C  | 1.91576000  | -2.56460500 | -1.59634800 |
| H   | -4.77996700 | 1.82735800  | -1.50625600 | C  | 3.68835700  | -1.15229500 | 0.06845700  |
| N   | -1.89060200 | 0.52776100  | -0.43102800 | C  | 3.28068600  | -2.92981800 | -1.52801400 |
| Co  | -0.05522300 | 0.88642900  | -0.03778000 | H  | 1.23130000  | -3.12170100 | -2.22791600 |
| O   | 0.25540100  | -0.01935300 | 3.03324600  | C  | 2.65042500  | 1.01353400  | 1.44632600  |
| O   | -0.65831900 | 1.53083400  | 1.66542100  | C  | 4.52683800  | -0.38639100 | 0.91536400  |
| C   | -0.36421000 | 1.04827800  | 2.82913300  | C  | 4.14887000  | -2.24801800 | -0.70486000 |
| O   | 1.72771200  | 1.64073900  | 0.33361700  | H  | 3.63523600  | -3.76320600 | -2.12521600 |
| O   | 0.09970300  | 2.73411100  | -0.56336000 | C  | 4.00992400  | 0.68725700  | 1.60489500  |
| C   | 1.31779800  | 2.74404800  | -0.15980400 | H  | 2.21408000  | 1.87074900  | 1.94309200  |
| O   | 0.62489400  | 0.26949800  | -1.67549100 | H  | 5.57606300  | -0.65199600 | 1.00114300  |
| O   | -0.75976700 | 1.26977300  | -3.15698200 | H  | 5.19474600  | -2.53047100 | -0.63765200 |
| C   | 0.13893900  | 0.47333200  | -2.87036000 | H  | 4.62549700  | 1.29858800  | 2.25400600  |
| C   | 0.80397300  | -0.40436200 | -3.91334900 | N  | 1.84328000  | 0.29694300  | 0.67631900  |
| H   | 0.54088700  | -1.44944400 | -3.71704400 | Co | 0.08027200  | 1.02696300  | 0.18718700  |
| H   | 0.47459000  | -0.12532300 | -4.91555300 | O  | -0.36844500 | 0.67725300  | -2.94437400 |
| H   | 1.89209700  | -0.32126000 | -3.83925100 | O  | 0.89921500  | 1.68863000  | -1.37777900 |
| C   | 2.18860200  | 3.94156100  | -0.29760900 | C  | 0.46069200  | 1.53258800  | -2.59801900 |
| H   | 1.58640400  | 4.85190400  | -0.28478000 | O  | -1.53701600 | 1.98757100  | -0.29795500 |
| H   | 2.93376500  | 3.95732400  | 0.50026800  | O  | -0.17048500 | 3.11282000  | 0.99047300  |
| H   | 2.70953400  | 3.87896600  | -1.26019100 | C  | -1.26223600 | 3.06327700  | 0.36286000  |
| C   | -0.83040300 | 1.89594500  | 3.98942400  | O  | -0.86883600 | 0.28891400  | 1.60277600  |
| H   | -0.25674200 | 2.82895800  | 4.00208700  | O  | 0.43755000  | 0.65652000  | 3.40283300  |
| H   | -1.88453400 | 2.15784700  | 3.86234000  | C  | -0.49824500 | 0.08304300  | 2.84699400  |
| H   | -0.68518000 | 1.36760400  | 4.93254700  | C  | -1.35554900 | -0.95007200 | 3.54475000  |
| A_T |             |             |             | H  | -1.03901300 | -1.94222800 | 3.20542200  |
| C   | -4.21067000 | -0.82228900 | -1.44380000 | H  | -1.22512700 | -0.87917500 | 4.62583900  |
|     |             |             |             | H  | -2.40781600 | -0.82800600 | 3.27741200  |

|   |             |            |             |
|---|-------------|------------|-------------|
| C | -2.26231600 | 4.17787600 | 0.36773500  |
| H | -1.81373900 | 5.09188100 | 0.75865800  |
| H | -2.64615300 | 4.34089000 | -0.64253100 |
| H | -3.10494700 | 3.88687300 | 1.00476900  |
| C | 1.05861500  | 2.50463000 | -3.58566300 |
| H | 0.59874600  | 3.48669000 | -3.42704100 |
| H | 2.13345300  | 2.60967900 | -3.41782300 |
| H | 0.86286500  | 2.17586100 | -4.60717600 |

TSA\_Q

|    |             |             |             |
|----|-------------|-------------|-------------|
| C  | -4.14930400 | -1.04263600 | -1.44098300 |
| C  | -4.92648400 | -1.50161500 | -0.37610700 |
| C  | -4.31600800 | -2.13419900 | 0.71124600  |
| C  | -2.93507500 | -2.30662800 | 0.72889500  |
| C  | -2.14694900 | -1.82758000 | -0.32891300 |
| C  | -2.76309500 | -1.19637400 | -1.41743000 |
| H  | -4.62121100 | -0.56099200 | -2.29208300 |
| H  | -6.00439100 | -1.36981300 | -0.39332300 |
| H  | -4.91682700 | -2.49303500 | 1.54157500  |
| H  | -2.44892100 | -2.79929100 | 1.56407100  |
| H  | -2.17545000 | -0.83099800 | -2.25048800 |
| C  | -0.67262200 | -2.03422600 | -0.22344500 |
| N  | 0.14418000  | -1.05204000 | -0.78340300 |
| H  | -0.13698500 | -0.44756700 | -1.93398000 |
| O  | -0.22068700 | -3.00203300 | 0.39520500  |
| C  | 1.54479600  | -1.33323200 | -0.79421200 |
| C  | 2.41765900  | -0.38675000 | -0.19886200 |
| C  | 2.08809300  | -2.44185600 | -1.41529300 |
| C  | 3.82980000  | -0.57192200 | -0.24320800 |
| C  | 3.48722400  | -2.63738200 | -1.45304100 |
| H  | 1.42868800  | -3.16750700 | -1.87888500 |
| C  | 2.64732800  | 1.62276800  | 0.97134000  |
| C  | 4.63702400  | 0.42375100  | 0.36194100  |
| C  | 4.34863200  | -1.72501100 | -0.88238600 |
| H  | 3.88027100  | -3.52021800 | -1.94709100 |
| C  | 4.05143700  | 1.51601900  | 0.96410100  |
| H  | 2.14731000  | 2.46649600  | 1.43441700  |
| H  | 5.71702800  | 0.31208700  | 0.34110700  |
| H  | 5.42361000  | -1.87145000 | -0.91489200 |
| H  | 4.64527800  | 2.29250900  | 1.43201200  |
| N  | 1.87180100  | 0.70510700  | 0.41362900  |
| Co | -0.19177100 | 0.82695400  | 0.31757400  |
| O  | -0.18923200 | 0.17762500  | -2.91711800 |
| O  | 0.21608300  | 1.84633600  | -1.47237600 |

|   |             |             |             |
|---|-------------|-------------|-------------|
| C | 0.05090700  | 1.41204300  | -2.64649000 |
| O | -2.13141600 | 1.58360800  | -0.01609700 |
| O | -0.61971100 | 2.78680500  | 1.00661900  |
| C | -1.81565700 | 2.67046500  | 0.57537300  |
| O | -0.52667400 | -0.13924000 | 1.87324200  |
| O | 0.82985700  | 0.77746000  | 3.41240700  |
| C | 0.19237300  | -0.18149200 | 2.98863600  |
| C | 0.13594900  | -1.52181100 | 3.67557500  |
| H | 0.50883300  | -2.29042100 | 2.99122400  |
| H | 0.72995800  | -1.50918100 | 4.59028200  |
| H | -0.90446000 | -1.76942700 | 3.90875300  |
| C | -2.82478500 | 3.75567200  | 0.78424100  |
| H | -2.33185400 | 4.72165200  | 0.90565300  |
| H | -3.52933500 | 3.78346900  | -0.04957700 |
| H | -3.38548200 | 3.53139200  | 1.69928800  |
| C | 0.10218600  | 2.36966900  | -3.79814200 |
| H | 0.66236200  | 3.26549600  | -3.52747200 |
| H | 0.53799000  | 1.88809600  | -4.67578500 |
| H | -0.92679500 | 2.65894300  | -4.04297300 |

TSA\_S

|   |             |             |             |
|---|-------------|-------------|-------------|
| C | 4.18100500  | -1.57078900 | 0.83503300  |
| C | 5.01635800  | -1.21888200 | -0.22702600 |
| C | 4.48319900  | -1.04918600 | -1.50814200 |
| C | 3.12026700  | -1.23240800 | -1.72311500 |
| C | 2.27402600  | -1.56151600 | -0.65364700 |
| C | 2.81170000  | -1.73411300 | 0.62842100  |
| H | 4.59479600  | -1.71597000 | 1.82842300  |
| H | 6.08023800  | -1.07986100 | -0.05844700 |
| H | 5.12960300  | -0.77570300 | -2.33664600 |
| H | 2.69321500  | -1.10353100 | -2.71200600 |
| H | 2.17718000  | -2.00439500 | 1.46325800  |
| C | 0.82660100  | -1.71571600 | -0.96180900 |
| N | -0.08652200 | -1.26457500 | 0.01521800  |
| H | 0.11755600  | -1.51236200 | 1.29680500  |
| O | 0.45706500  | -2.17518900 | -2.03950600 |
| C | -1.46280800 | -1.58594900 | -0.22238200 |
| C | -2.37362400 | -0.52646000 | -0.03078800 |
| C | -1.95376300 | -2.84307500 | -0.51330700 |
| C | -3.77798600 | -0.72420300 | -0.11389000 |
| C | -3.34986600 | -3.05056900 | -0.62193000 |
| H | -1.27189600 | -3.67364900 | -0.65265700 |
| C | -2.63014300 | 1.73654500  | 0.48830100  |
| C | -4.60373500 | 0.40097500  | 0.13247100  |



|       |             |             |             |     |             |             |             |
|-------|-------------|-------------|-------------|-----|-------------|-------------|-------------|
| C     | -4.24989500 | -2.02402800 | -0.42521200 | N   | -0.23984100 | -1.03072700 | 0.62228500  |
| H     | -3.71041300 | -4.04731400 | -0.85527300 | H   | -0.22437500 | -0.51632600 | 1.80025300  |
| C     | -4.03335000 | 1.61743600  | 0.43967100  | O   | 0.48220900  | -3.00241700 | -0.34302800 |
| H     | -2.14607600 | 2.67860700  | 0.71522000  | C   | -1.61031100 | -1.42803900 | 0.45836100  |
| H     | -5.68253400 | 0.28961100  | 0.08066800  | C   | -2.49703200 | -0.40606000 | 0.04507400  |
| H     | -5.31909600 | -2.19449100 | -0.49968400 | C   | -2.12516200 | -2.66130500 | 0.80719200  |
| H     | -4.63993700 | 2.49295000  | 0.63920600  | C   | -3.89955600 | -0.62790100 | -0.01282200 |
| N     | -1.84411900 | 0.69890600  | 0.25342700  | C   | -3.51955100 | -2.89418000 | 0.73673900  |
| Co    | 0.05661900  | 0.74899600  | 0.28514100  | H   | -1.46763100 | -3.45073700 | 1.14753000  |
| O     | 0.13648500  | -1.57642600 | 2.46483300  | C   | -2.72686900 | 1.79574800  | -0.68701200 |
| O     | 0.00201800  | 0.65288400  | 2.22602200  | C   | -4.70902700 | 0.45800600  | -0.43085200 |
| C     | 0.07940700  | -0.38715000 | 2.94278100  | C   | -4.39628200 | -1.90775500 | 0.34056500  |
| O     | 1.98647000  | 1.23426200  | 0.43745500  | H   | -3.89547200 | -3.87397700 | 1.01343600  |
| O     | 0.35706100  | 2.64517400  | 0.53707700  | C   | -4.12806700 | 1.66393100  | -0.75939100 |
| C     | 1.62518300  | 2.44991600  | 0.56051400  | H   | -2.22874600 | 2.72268900  | -0.95223200 |
| O     | 0.23422000  | 0.85927900  | -1.57260100 | H   | -5.78515200 | 0.32456300  | -0.48828400 |
| O     | -1.19544000 | 2.55106300  | -2.04374100 | H   | -5.46469900 | -2.09254400 | 0.29328700  |
| C     | -0.41661400 | 1.65477700  | -2.38031900 | H   | -4.72374600 | 2.51027400  | -1.08115200 |
| C     | -0.10198900 | 1.36157700  | -3.83519600 | N   | -1.95042500 | 0.79461300  | -0.30302600 |
| H     | -0.28844300 | 0.30407500  | -4.04608400 | Co  | 0.10601300  | 0.78030600  | -0.29193800 |
| H     | -0.70875400 | 1.98847300  | -4.49048400 | O   | -0.39697600 | 0.09703600  | 2.83086500  |
| H     | 0.95946000  | 1.55190100  | -4.02491900 | O   | 0.10714300  | 1.78549600  | 1.44952100  |
| C     | 2.59229200  | 3.57442000  | 0.68146500  | C   | -0.23468000 | 1.34333300  | 2.58941500  |
| H     | 2.18227000  | 4.35732300  | 1.32316300  | O   | 2.42768400  | 2.29732400  | -0.40642400 |
| H     | 3.54578500  | 3.21362900  | 1.07087900  | O   | 0.31883300  | 2.43105600  | -1.14405300 |
| H     | 2.75464400  | 3.99675100  | -0.31711200 | C   | 1.54314100  | 2.89585300  | -1.02835700 |
| C     | 0.13875300  | -0.23100000 | 4.43056300  | O   | 1.08372100  | -0.10178100 | -1.64630200 |
| H     | -0.25635100 | 0.73927300  | 4.73275600  | O   | -0.72901800 | -0.86813700 | -2.73803900 |
| H     | -0.40788100 | -1.04229700 | 4.91564700  | C   | 0.49369500  | -0.79398100 | -2.59063700 |
| H     | 1.18926100  | -0.29824200 | 4.73691700  | C   | 1.45731100  | -1.54994300 | -3.47742300 |
| TSA_T |             |             |             | H   | 1.53704000  | -2.57006900 | -3.08476000 |
| C     | 3.87703400  | -0.41777800 | 1.82406600  | H   | 1.06174900  | -1.60331100 | -4.49407700 |
| C     | 4.86864500  | -1.05313600 | 1.07566400  | H   | 2.45080600  | -1.09872900 | -3.47568800 |
| C     | 4.51336200  | -1.99750700 | 0.10716000  | C   | 1.76482400  | 4.21708800  | -1.72025300 |
| C     | 3.17342000  | -2.29397400 | -0.11620300 | H   | 1.05569900  | 4.95833900  | -1.33928600 |
| C     | 2.16893300  | -1.64355700 | 0.61976300  | H   | 2.78726300  | 4.55978500  | -1.55575000 |
| C     | 2.53216400  | -0.70779800 | 1.59811400  | H   | 1.57987600  | 4.10180500  | -2.79306400 |
| H     | 4.14694800  | 0.30422300  | 2.58846600  | C   | -0.46714900 | 2.32497000  | 3.69602400  |
| H     | 5.91474300  | -0.81817700 | 1.24818000  | H   | -1.45295300 | 2.78016100  | 3.54493600  |
| H     | 5.28169000  | -2.49729400 | -0.47470200 | H   | -0.44828200 | 1.82742500  | 4.66613500  |
| H     | 2.88738600  | -3.01802200 | -0.87037600 | H   | 0.28017300  | 3.12034200  | 3.65235700  |
| H     | 1.78534700  | -0.22498200 | 2.21006900  | B_Q |             |             |             |
| C     | 0.76167200  | -1.97760000 | 0.27013000  | C   | 3.53800500  | -0.26384600 | -2.06022500 |

|    |             |             |             |     |             |                         |
|----|-------------|-------------|-------------|-----|-------------|-------------------------|
| C  | 4.80533700  | -0.51089000 | -1.52589700 |     |             |                         |
| C  | 4.93584500  | -1.07438100 | -0.25209700 | B_S |             |                         |
| C  | 3.80077600  | -1.38612400 | 0.48916600  | C   | 3.79409700  | 0.06602900 -1.92525700  |
| C  | 2.52668600  | -1.13018800 | -0.03984700 | C   | 4.92065100  | -0.24073400 -1.15859000 |
| C  | 2.39836700  | -0.57131000 | -1.32085800 | C   | 4.80021200  | -1.07952700 -0.04603700 |
| H  | 3.43804700  | 0.17055900  | -3.05003300 | C   | 3.55696900  | -1.60399400 0.29880100  |
| H  | 5.69267200  | -0.26523900 | -2.10190700 | C   | 2.41864100  | -1.26903400 -0.44675500 |
| H  | 5.92190700  | -1.26572300 | 0.15971300  | C   | 2.54463800  | -0.44245800 -1.56934400 |
| H  | 3.88386000  | -1.82000300 | 1.47994000  | H   | 3.88812200  | 0.70034700 -2.80199900  |
| H  | 1.41474800  | -0.37477200 | -1.73151100 | H   | 5.89105700  | 0.16395100 -1.43135900  |
| C  | 1.34177300  | -1.46173900 | 0.78060800  | H   | 5.67558700  | -1.32486700 0.54826500  |
| N  | 0.10684800  | -1.00243600 | 0.28660200  | H   | 3.45309700  | -2.26296800 1.15518200  |
| O  | 1.40825300  | -2.02242400 | 1.87301600  | H   | 1.66925600  | -0.20416800 -2.16099400 |
| C  | -0.95975100 | -1.79089500 | 0.16016500  | C   | 1.10793500  | -1.87394300 -0.06014700 |
| C  | -2.20690700 | -1.12273600 | -0.17245500 | N   | -0.01001700 | -1.09219000 -0.19006300 |
| C  | -0.96428500 | -3.20729300 | 0.27719500  | O   | 1.08690300  | -3.05963400 0.31904100  |
| C  | -3.38745100 | -1.87436500 | -0.37740100 | C   | -1.29038000 | -1.65907000 -0.21600200 |
| C  | -2.13911100 | -3.92909300 | 0.07575500  | C   | -2.34516100 | -0.70215400 -0.19643000 |
| H  | -0.04220500 | -3.72104300 | 0.52093900  | C   | -1.65175500 | -2.99848400 -0.34602700 |
| C  | -3.30052700 | 0.87574800  | -0.58504900 | C   | -3.71303800 | -1.06886800 -0.31443700 |
| C  | -4.56426200 | -1.16351800 | -0.70693000 | C   | -3.01134300 | -3.36788300 -0.46507000 |
| C  | -3.33396000 | -3.29214000 | -0.24675900 | H   | -0.89022500 | -3.76276400 -0.36248000 |
| H  | -2.11708200 | -5.00990600 | 0.16623300  | C   | -2.88578400 | 1.57102500 -0.03645300  |
| C  | -4.51762700 | 0.21298800  | -0.81325000 | C   | -4.66920300 | -0.02388700 -0.28957200 |
| H  | -3.22593200 | 1.95655900  | -0.65048300 | C   | -4.03265000 | -2.44215100 -0.45044300 |
| H  | -5.48871800 | -1.70831300 | -0.87156200 | H   | -3.24544600 | -4.42331400 -0.56900200 |
| H  | -4.24005100 | -3.86730800 | -0.40791800 | C   | -4.25829400 | 1.28426400 -0.15418000  |
| H  | -5.40038100 | 0.78941600  | -1.06501000 | H   | -2.52730600 | 2.58537600 0.08603300   |
| N  | -2.18004700 | 0.22498600  | -0.27483100 | H   | -5.72336000 | -0.26928400 -0.37770700 |
| Co | -0.27780400 | 1.09443200  | 0.16679200  | H   | -5.07203500 | -2.74108500 -0.53778300 |
| O  | 1.53052000  | 1.74237600  | 1.13007000  | H   | -4.96853200 | 2.10252100 -0.13077300  |
| O  | -0.14846500 | 1.03092700  | 2.36787100  | N   | -1.97479300 | 0.60615400 -0.06147100  |
| C  | 1.05684400  | 1.43092300  | 2.27274500  | Co  | -0.10262300 | 0.80098200 0.23693500   |
| O  | -0.10576000 | 1.74968900  | -1.87390100 | O   | 1.67138500  | 0.95013100 1.09808800   |
| O  | -0.81375400 | 3.16391800  | -0.33919200 | O   | -0.14401400 | 0.38850000 2.11758200   |
| C  | -0.51198900 | 2.91580600  | -1.54994400 | C   | 1.11993600  | 0.61326000 2.19720700   |
| C  | -0.60104600 | 3.99769400  | -2.59342800 | O   | 0.18348300  | 1.62777700 -1.50252600  |
| H  | -0.87314300 | 3.57558100  | -3.56344900 | O   | -0.19298500 | 2.76890500 0.28968800   |
| H  | -1.32026000 | 4.76343300  | -2.29633200 | C   | 0.07625100  | 2.78413300 -0.96246900  |
| H  | 0.38415600  | 4.46828800  | -2.69257100 | C   | 0.28210300  | 4.04432100 -1.72430500  |
| C  | 1.94391600  | 1.45701100  | 3.48790700  | H   | 0.04145500  | 3.89306000 -2.77817300  |
| H  | 2.72027400  | 2.21832800  | 3.38887800  | H   | -0.32497900 | 4.84501500 -1.29734200  |
| H  | 1.35854200  | 1.62290700  | 4.39454200  | H   | 1.33825300  | 4.32717900 -1.64309700  |
| H  | 2.43047700  | 0.47725600  | 3.56696500  | C   | 1.88325000  | 0.43913400 3.46039000   |

H 2.69549300 1.16735600 3.51048400  
H 1.22262400 0.53279000 4.32385000  
H 2.32140900 -0.56593100 3.45536400

B\_T

C 3.54290800 -0.51786400 -2.16860800  
C 4.77151600 -0.79951500 -1.56520400  
C 4.81384800 -1.36852300 -0.28812200  
C 3.62950500 -1.65380900 0.38426100  
C 2.39500700 -1.35354000 -0.21025700  
C 2.35485600 -0.78877600 -1.49309800  
H 3.51121900 -0.08602600 -3.16420800  
H 5.69625500 -0.57905200 -2.09043200  
H 5.76903600 -1.58716800 0.17948400  
H 3.64479300 -2.09563100 1.37507900  
H 1.39968500 -0.56883000 -1.95533000  
C 1.15678500 -1.67839900 0.53440100  
N -0.01874400 -1.00983600 0.13739400  
O 1.14285400 -2.49590500 1.45434000  
C -1.22118100 -1.70963000 0.06038800  
C -2.34704100 -0.87129500 -0.15075400  
C -1.42008200 -3.08630900 0.08225000  
C -3.64951600 -1.39034200 -0.34332700  
C -2.71911400 -3.61180600 -0.10279400  
H -0.58707800 -3.75926200 0.24040300  
C -3.07925700 1.33277500 -0.35064300  
C -4.68907500 -0.45180300 -0.54882500  
C -3.81676200 -2.80051000 -0.31182800  
H -2.84596900 -4.68954300 -0.07914300  
C -4.40184500 0.89871600 -0.55280600  
H -2.82019300 2.38466100 -0.33792600  
H -5.70472300 -0.80444800 -0.70043100  
H -4.80754600 -3.22057400 -0.44982000  
H -5.17803600 1.63932700 -0.70661000  
N -2.08731200 0.46882800 -0.15794700  
Co -0.21338800 0.84201600 0.20972400  
O 1.59138700 1.17508200 0.83961900  
O 0.12183000 1.04591300 2.46345900  
C 1.31589600 1.21791400 2.10052000  
O 0.20649200 1.89452500 -1.79978900  
O -0.50185300 2.76755500 0.08366600  
C -0.13157500 2.91463600 -1.14651100  
C -0.11632200 4.29627800 -1.72911500  
H 0.09650000 4.25927400 -2.79817100

H -1.07938600 4.78380500 -1.55224600  
H 0.65366200 4.88830800 -1.22317700  
C 2.44064900 1.44324600 3.06535900  
H 2.97950800 2.35631400 2.79537100  
H 2.06479900 1.51724400 4.08630600  
H 3.14425200 0.60773500 2.98764500

TSB\_Q

C -4.44809600 0.74219200 -1.10273400  
C -4.14077500 2.09591200 -1.29198200  
C -2.91506900 2.59197800 -0.85949000  
C -1.99395300 1.72743700 -0.24671300  
C -2.28500100 0.35780900 -0.01375400  
C -3.53391800 -0.10074100 -0.46691100  
H -5.40373200 0.35419800 -1.44602800  
H -4.85233500 2.75405000 -1.78197200  
H -2.65145400 3.63397900 -1.01586000  
H -3.80529300 -1.14212700 -0.30108800  
C -0.65505900 2.27579000 0.09366700  
O -0.44720600 3.46912800 0.32287700  
N 0.33616500 1.28254500 0.05819000  
C 1.66092200 1.50624700 0.02288400  
C 2.46172700 0.31135000 -0.20020800  
C 2.34003700 2.74533400 0.15426100  
C 3.87339000 0.38937300 -0.27066600  
C 3.73401800 2.79930900 0.09344600  
H 1.76138200 3.64244000 0.31803700  
C 2.48805500 -1.97160900 -0.59739900  
C 4.58538900 -0.80815900 -0.51274800  
C 4.49974600 1.65744600 -0.11190800  
H 4.22756700 3.75835000 0.21059300  
C 3.89017300 -1.99052400 -0.67746800  
H 1.90496400 -2.87975300 -0.71857600  
H 5.66911600 -0.78236900 -0.57117700  
H 5.58232600 1.71830300 -0.16147400  
H 4.40359500 -2.92598300 -0.86769400  
N 1.80009500 -0.85588600 -0.36700700  
Co -0.31253700 -0.68834900 -0.01958300  
C -1.09364300 -2.46300200 -1.62392600  
O -1.06728200 -2.65751300 -0.36024900  
O -0.65720000 -1.37089300 -2.10257800  
C -0.87908200 -0.90880800 2.83038500  
O -2.06847400 -0.57994900 2.44019700  
O 0.10641500 -0.92730500 2.05224500

C -1.68994500 -3.50943100 -2.52763300  
H -2.77004600 -3.33190000 -2.59361500  
H -1.26935700 -3.44003200 -3.53283800  
H -1.53477400 -4.50983300 -2.11775300  
C -0.72848700 -1.26807600 4.27959400  
H -1.40272800 -2.09644800 4.51839000  
H 0.30119500 -1.54877000 4.50211400  
H -1.02520500 -0.41390600 4.89646000  
H -2.03615600 -0.25067600 1.32889300

TSB\_S

C 4.51490500 -0.09323300 -0.61678600  
C 4.39165200 -1.36437700 -1.18983100  
C 3.18908300 -2.06867500 -1.09822600  
C 2.11137600 -1.49273700 -0.42870000  
C 2.22076900 -0.22107900 0.18052100  
C 3.43582900 0.47446900 0.06163400  
H 5.45415700 0.44644900 -0.69518400  
H 5.23455900 -1.80300600 -1.71585800  
H 3.07479700 -3.04402900 -1.56138900  
H 3.54415200 1.44887200 0.53052200  
C 0.76572900 -2.13626900 -0.43673900  
O 0.57953200 -3.33078000 -0.73225800  
N -0.20094400 -1.22562600 -0.14926300  
C -1.57131600 -1.42545400 -0.27550100  
C -2.31149200 -0.20697000 -0.32296600  
C -2.26917900 -2.62306600 -0.36853000  
C -3.72308600 -0.19319300 -0.46574200  
C -3.67785400 -2.60952100 -0.50457800  
H -1.73266900 -3.56063900 -0.33954900  
C -2.19889300 2.12572300 -0.27729600  
C -4.35314800 1.07598800 -0.51779000  
C -4.40153600 -1.43625500 -0.55518300  
H -4.19601300 -3.56150100 -0.57262700  
C -3.59678700 2.22466900 -0.42892700  
H -1.57397300 3.00730400 -0.18631400  
H -5.43218900 1.12873700 -0.62837400  
H -5.48101900 -1.44458800 -0.66613000  
H -4.05366700 3.20687300 -0.46613800  
N -1.58932300 0.95158400 -0.23263200  
Co 0.29939600 0.57576500 0.11629600  
C 1.05902000 2.28116700 -1.27813700  
O 0.89751100 2.45959000 -0.02129600  
O 0.75797500 1.11216000 -1.70743900

C 0.48926100 0.17134700 2.90686000  
O 1.67782300 -0.23191500 2.72173000  
O -0.26621800 0.54781200 1.95258700  
C 1.60578300 3.33534200 -2.17516600  
H 2.69700500 3.22945400 -2.19777300  
H 1.22451100 3.20658400 -3.18998300  
H 1.35927200 4.32663100 -1.79022100  
C -0.07628400 0.17886700 4.29667900  
H -0.87676500 0.91512000 4.38158800  
H -0.49123200 -0.81518200 4.49944900  
H 0.71250700 0.37715100 5.02442600  
H 1.84428400 -0.15927700 1.43350700

TSB\_T

C -4.47269800 0.27396000 -0.67502400  
C -4.31666700 1.57733200 -1.16558400  
C -3.11204700 2.26448200 -0.99818200  
C -2.06477300 1.63608500 -0.33099200  
C -2.21238300 0.33392600 0.20278000  
C -3.42428200 -0.34943500 -0.00167400  
H -5.41460700 -0.24670400 -0.81811700  
H -5.13785000 2.05412100 -1.69236600  
H -2.97382000 3.26247700 -1.40232700  
H -3.55004500 -1.35144900 0.39798300  
C -0.70955800 2.24754800 -0.25467100  
O -0.47609100 3.44427300 -0.45202800  
N 0.23481300 1.28016100 -0.00412700  
C 1.61964500 1.47048200 -0.08826500  
C 2.33010400 0.25525700 -0.28914100  
C 2.33749400 2.65343100 -0.00646000  
C 3.74122600 0.22384000 -0.41206500  
C 3.74955100 2.62545000 -0.12218000  
H 1.82248900 3.59140600 0.14513900  
C 2.15541100 -2.05765400 -0.56410500  
C 4.34013600 -1.04252700 -0.62637400  
C 4.44675000 1.45279400 -0.32126400  
H 4.28884500 3.56504000 -0.05195900  
C 3.55245400 -2.17247000 -0.70388500  
H 1.50284600 -2.92274400 -0.60452400  
H 5.41909500 -1.11016000 -0.72861600  
H 5.52804200 1.45066600 -0.41305700  
H 3.98560800 -3.15252800 -0.86662500  
N 1.57517600 -0.88305500 -0.36956800  
Co -0.32022900 -0.50937400 0.05441900

C -1.21085200 -2.25942700 -1.63663500  
 O -0.89954000 -2.29008500 -0.37338600  
 O -1.06492000 -1.21812900 -2.30689000  
 C -0.48547300 -0.49608300 2.95462600  
 O -1.57478800 0.13056700 2.75266600  
 O 0.24337900 -0.94325900 2.01229700  
 C -1.76545500 -3.53125000 -2.21876200  
 H -2.75581700 -3.71487100 -1.78780000  
 H -1.85202100 -3.45079400 -3.30307600  
 H -1.12619100 -4.37757700 -1.95212900  
 C -0.01824000 -0.69602300 4.37157000  
 H 0.34857300 -1.71746500 4.50047000  
 H 0.81906000 -0.01415000 4.55827100  
 H -0.81768100 -0.48469500 5.08262200  
 H -1.79454100 0.17204500 1.40355700

C\_Q

C -4.41589900 0.70441200 -1.25533600  
 C -4.28476800 2.08566200 -1.05812000  
 C -3.06434000 2.60931700 -0.64254300  
 C -1.98483100 1.74031800 -0.42099900  
 C -2.08328500 0.33815800 -0.60035000  
 C -3.32741100 -0.14780400 -1.03609300  
 H -5.37155300 0.29671400 -1.57660600  
 H -5.13059200 2.74378900 -1.23470400  
 H -2.93574900 3.67866400 -0.49952700  
 H -2.47627200 -0.41261000 1.33357600  
 H -3.46391300 -1.21813900 -1.18664500  
 C -0.67585200 2.29771800 -0.00845100  
 O -0.50025800 3.47334900 0.32871100  
 N 0.33231400 1.32362700 -0.03374600  
 C 1.65341000 1.57591500 -0.05700400  
 C 2.48232500 0.38366500 -0.07457700  
 C 2.29880500 2.83488400 -0.10402300  
 C 3.89487600 0.48539000 -0.10652200  
 C 3.69484000 2.91582000 -0.13414400  
 H 1.69809100 3.73307400 -0.10185400  
 C 2.56518200 -1.93057600 -0.10921900  
 C 4.63747800 -0.71808500 -0.12693700  
 C 4.48987500 1.77797000 -0.12994400  
 H 4.16269300 3.89460200 -0.16077100  
 C 3.97042000 -1.92733200 -0.12502200  
 H 2.00663900 -2.86175100 -0.11672300  
 H 5.72220700 -0.67544100 -0.14843000

H 5.57212100 1.85787000 -0.15265700  
 H 4.50773800 -2.86858700 -0.14272100  
 N 1.84596700 -0.81143800 -0.08419000  
 Co -0.31697300 -0.67210300 -0.07643800  
 C -1.32365700 -0.75107000 2.81016400  
 O -2.53928100 -0.60349500 2.30128100  
 O -0.29760500 -0.69168800 2.12390600  
 C -0.66460500 -2.75375200 -1.51992600  
 O -0.88109800 -2.68980100 -0.25548700  
 O -0.19542900 -1.75915500 -2.13887400  
 C -1.31314200 -0.99775100 4.28409400  
 H -0.28793500 -1.08309300 4.64246900  
 H -1.82805000 -0.17913400 4.79587400  
 H -1.86362400 -1.91983200 4.49708500  
 C -1.00893800 -4.03089200 -2.24559200  
 H -2.09911400 -4.13483100 -2.28450000  
 H -0.61497200 -4.02282500 -3.26318100  
 H -0.61572000 -4.89191600 -1.69750100

C\_S

C -4.54786300 -0.01644800 -0.52443000  
 C -4.54530400 1.35406600 -0.80663400  
 C -3.34095300 2.05710500 -0.83687700  
 C -2.14721600 1.37427800 -0.58654600  
 C -2.13387800 -0.00687200 -0.30361200  
 C -3.34867000 -0.69746400 -0.27430100  
 H -5.48942000 -0.55885200 -0.49769600  
 H -5.48173400 1.87011300 -0.99703200  
 H -3.31497200 3.12233800 -1.04937100  
 H -2.20015400 0.62999200 1.59630000  
 H -3.37090100 -1.76246500 -0.05907000  
 C -0.81814900 2.04964200 -0.57936900  
 O -0.66299400 3.26643500 -0.79823600  
 N 0.16464400 1.14836000 -0.30666300  
 C 1.52826700 1.40320000 -0.25194900  
 C 2.32905800 0.22623400 -0.09763100  
 C 2.17752300 2.63165800 -0.32862600  
 C 3.74628200 0.29725700 -0.02315400  
 C 3.58813800 2.69629100 -0.25192600  
 H 1.59666400 3.53480500 -0.44795300  
 C 2.34375300 -2.09492600 0.10696400  
 C 4.44673000 -0.92722000 0.12451300  
 C 4.36913000 1.56931800 -0.10309600  
 H 4.06134300 3.67204900 -0.31429300

|    |             |             |             |
|----|-------------|-------------|-------------|
| C  | 3.75171700  | -2.11501200 | 0.18690900  |
| H  | 1.76271600  | -3.01069600 | 0.15361800  |
| H  | 5.53110900  | -0.91299800 | 0.18568600  |
| H  | 5.45101600  | 1.63593200  | -0.04738100 |
| H  | 4.26370700  | -3.06424700 | 0.29798100  |
| N  | 1.66470800  | -0.96745000 | -0.02865400 |
| Co | -0.33947800 | -0.66456200 | -0.09526400 |
| C  | -0.85876000 | -0.02907600 | 2.75772100  |
| O  | -1.95406600 | 0.66622100  | 2.55086300  |
| O  | -0.21789200 | -0.59819300 | 1.85748600  |
| C  | -0.69507300 | -2.42008000 | -1.57807400 |
| O  | -0.81587200 | -2.58352800 | -0.31710500 |
| O  | -0.37727700 | -1.23428800 | -1.94930800 |
| C  | -0.41332800 | -0.08016500 | 4.17975600  |
| H  | 0.41492000  | -0.77881900 | 4.29006700  |
| H  | -0.09366600 | 0.92387800  | 4.47955100  |
| H  | -1.25198700 | -0.36809800 | 4.81923600  |
| C  | -0.94166800 | -3.51434800 | -2.55816200 |
| H  | -2.01690400 | -3.55267100 | -2.76921500 |
| H  | -0.40890300 | -3.31993200 | -3.49061200 |
| H  | -0.63982200 | -4.47406100 | -2.13338400 |

C\_T

|   |             |             |             |
|---|-------------|-------------|-------------|
| C | -4.53505200 | 0.20245800  | -0.76134200 |
| C | -4.49158300 | 1.59409400  | -0.90170600 |
| C | -3.27257400 | 2.26853200  | -0.82926600 |
| C | -2.10352300 | 1.53433700  | -0.61937000 |
| C | -2.14030500 | 0.13665700  | -0.48578400 |
| C | -3.36044200 | -0.53461800 | -0.55527000 |
| H | -5.48921900 | -0.31503200 | -0.81227500 |
| H | -5.41082600 | 2.14968800  | -1.06130700 |
| H | -3.21644800 | 3.34923700  | -0.92651500 |
| H | -2.11952100 | 0.37459800  | 1.65173000  |
| H | -3.40915500 | -1.61411400 | -0.44755700 |
| C | -0.76055500 | 2.15661600  | -0.49306900 |
| O | -0.54801100 | 3.37549100  | -0.56492600 |
| N | 0.18455400  | 1.18310800  | -0.28170400 |
| C | 1.55155800  | 1.39792700  | -0.09666400 |
| C | 2.32111800  | 0.19454800  | -0.05349900 |
| C | 2.21903400  | 2.60824200  | 0.04367500  |
| C | 3.73003700  | 0.21873400  | 0.11641600  |
| C | 3.62378100  | 2.62935200  | 0.21879600  |
| H | 1.66222000  | 3.53367100  | 0.01544600  |
| C | 2.28352400  | -2.13580600 | -0.15860200 |

|    |             |             |             |
|----|-------------|-------------|-------------|
| C  | 4.39899800  | -1.03054800 | 0.13714500  |
| C  | 4.37591200  | 1.47517400  | 0.25430000  |
| H  | 4.11299700  | 3.59293100  | 0.32619500  |
| C  | 3.68157600  | -2.20002200 | -0.00113200 |
| H  | 1.68254900  | -3.03379700 | -0.25927400 |
| H  | 5.47759700  | -1.05203900 | 0.26304500  |
| H  | 5.45264300  | 1.50716300  | 0.38675900  |
| H  | 4.17053800  | -3.16741600 | 0.01183900  |
| N  | 1.63359800  | -0.98169200 | -0.18380500 |
| Co | -0.36963900 | -0.63231500 | -0.24606400 |
| C  | -0.75253700 | -0.13363700 | 2.86244700  |
| O  | -1.86512400 | 0.53711300  | 2.58605800  |
| O  | -0.16246000 | -0.82294600 | 2.02693700  |
| C  | -0.90837300 | -2.61417900 | -1.69066600 |
| O  | -0.87845800 | -2.51859500 | -0.40029800 |
| O  | -0.64974200 | -1.60428500 | -2.39022500 |
| C  | -0.28148100 | 0.04080200  | 4.27000700  |
| H  | 0.54652300  | -0.63746100 | 4.47330700  |
| H  | 0.04949300  | 1.07679900  | 4.40230900  |
| H  | -1.10560300 | -0.13649200 | 4.96619200  |
| C  | -1.27276700 | -3.94130900 | -2.29300200 |
| H  | -2.33408800 | -4.13560700 | -2.10266000 |
| H  | -1.09429200 | -3.93882300 | -3.36893900 |
| H  | -0.69858300 | -4.74021900 | -1.81583000 |

D\_Q

|   |            |             |             |
|---|------------|-------------|-------------|
| C | 2.72585600 | -0.01949000 | 3.64835200  |
| C | 3.66987400 | 0.98465900  | 3.87775900  |
| C | 4.53920300 | 1.38318200  | 2.85614200  |
| C | 4.46075900 | 0.78349500  | 1.60268500  |
| C | 3.49740800 | -0.20675200 | 1.36394800  |
| C | 2.63592600 | -0.61357500 | 2.39155300  |
| H | 2.05519800 | -0.33101300 | 4.44291800  |
| H | 3.72962500 | 1.45849900  | 4.85315300  |
| H | 5.27035800 | 2.16476600  | 3.03816600  |
| H | 5.11268000 | 1.09365100  | 0.79319200  |
| H | 1.89448700 | -1.37996400 | 2.20077300  |
| C | 3.38381000 | -0.77604600 | 0.00375400  |
| N | 2.11020800 | -1.27012300 | -0.34208500 |
| O | 4.29724500 | -0.75437900 | -0.81784400 |
| C | 1.94625500 | -2.45114600 | -0.93528900 |
| C | 0.62596700 | -2.70891700 | -1.48537700 |
| C | 2.93473500 | -3.46911000 | -1.04434900 |
| C | 0.35215600 | -3.93623800 | -2.13540700 |

|    |             |             |             |     |             |             |             |
|----|-------------|-------------|-------------|-----|-------------|-------------|-------------|
| C  | 2.63740100  | -4.67744100 | -1.66863600 | C   | -2.26142900 | 3.91960700  | -0.04869600 |
| H  | 3.92085300  | -3.29606100 | -0.63085100 | C   | -0.69595200 | 3.56528400  | -2.33934600 |
| C  | -1.48577400 | -1.89179900 | -1.93137600 | C   | -1.88328500 | 5.03737800  | -0.82697100 |
| C  | -0.93763400 | -4.10658200 | -2.68860700 | H   | -2.89833300 | 4.05255400  | 0.81997700  |
| C  | 1.37769300  | -4.92159100 | -2.21067800 | C   | 0.19831900  | 1.02723200  | -2.90038800 |
| H  | 3.40448000  | -5.44190100 | -1.73330400 | C   | 0.06829000  | 3.33524800  | -3.51147700 |
| C  | -1.85327000 | -3.07726400 | -2.59131900 | C   | -1.13467900 | 4.86183800  | -1.96725800 |
| H  | -2.17227300 | -1.05584100 | -1.85998600 | H   | -2.21529800 | 6.02768000  | -0.53265000 |
| H  | -1.18593600 | -5.03596300 | -3.19180400 | C   | 0.48662400  | 2.06209700  | -3.81290000 |
| H  | 1.16159100  | -5.86650300 | -2.69900600 | H   | 0.59052500  | 0.02897100  | -3.07016400 |
| H  | -2.84724100 | -3.16464700 | -3.01515700 | H   | 0.31186500  | 4.17549500  | -4.15514300 |
| N  | -0.28658700 | -1.72136000 | -1.37942100 | H   | -0.86745300 | 5.70410800  | -2.59832000 |
| Co | 0.36005800  | -0.01100100 | -0.12944300 | H   | 1.06412900  | 1.84475200  | -4.70419000 |
| O  | -0.49291700 | -1.07229400 | 1.38888800  | N   | -0.50695900 | 1.19952300  | -1.79060400 |
| O  | -0.93503500 | 0.66501500  | 2.75175000  |     |             |             |             |
| C  | -0.76771500 | -0.55777300 | 2.53857800  | D_S |             |             |             |
| O  | 1.00834000  | 1.71385400  | 0.68585900  | C   | 2.10543100  | -1.85446900 | -3.79652200 |
| O  | 2.54844000  | 1.97520000  | -0.92806300 | C   | 3.08356900  | -2.84075200 | -3.64732100 |
| C  | 1.93118600  | 2.38180200  | 0.07743600  | C   | 4.00844700  | -2.75602500 | -2.60091300 |
| C  | 2.22344700  | 3.74999300  | 0.66333600  | C   | 3.94754900  | -1.69517600 | -1.70080800 |
| H  | 2.41671200  | 3.66294700  | 1.73663500  | C   | 2.94196500  | -0.72622400 | -1.82346600 |
| H  | 3.07892900  | 4.21415500  | 0.16936600  | C   | 2.03643600  | -0.79959200 | -2.88787000 |
| H  | 1.34126700  | 4.38790000  | 0.53769200  | H   | 1.39667100  | -1.90676100 | -4.61779400 |
| C  | -0.88541900 | -1.54980200 | 3.67865900  | H   | 3.13153500  | -3.66972200 | -4.34765400 |
| H  | -1.22385700 | -1.05974700 | 4.59282500  | H   | 4.77372600  | -3.51833700 | -2.48841400 |
| H  | -1.58514500 | -2.34452700 | 3.40461400  | H   | 4.65348300  | -1.62308100 | -0.88067000 |
| H  | 0.08907900  | -2.01818800 | 3.85548400  | H   | 1.28493300  | -0.02835600 | -2.99130700 |
| C  | -4.37940100 | -1.02092700 | 3.14674400  | C   | 2.91660900  | 0.42323800  | -0.87459800 |
| C  | -4.70573900 | -2.29422300 | 2.67526800  | N   | 1.70086300  | 1.04500500  | -0.62735100 |
| C  | -4.55914700 | -2.59389900 | 1.31782700  | O   | 3.98297600  | 0.85416600  | -0.41210100 |
| C  | -4.08369800 | -1.62474500 | 0.43752000  | C   | 1.65369700  | 2.43001700  | -0.55671900 |
| C  | -3.71938000 | -0.35707800 | 0.91203200  | C   | 0.43054800  | 2.96456800  | -0.06708800 |
| C  | -3.88424000 | -0.05523300 | 2.27070000  | C   | 2.63044000  | 3.33359300  | -0.97882600 |
| H  | -4.51011600 | -0.77793400 | 4.19679300  | C   | 0.20761900  | 4.36875900  | 0.01584700  |
| H  | -5.08296900 | -3.04747600 | 3.36071600  | C   | 2.39738900  | 4.72228300  | -0.92377600 |
| H  | -4.82157100 | -3.57957400 | 0.94525700  | H   | 3.57939800  | 2.97000300  | -1.34872700 |
| H  | -3.99018300 | -1.84507500 | -0.61944700 | C   | -1.62304900 | 2.49558400  | 0.91456100  |
| H  | -3.63672700 | 0.93230600  | 2.64207300  | C   | -1.02090900 | 4.79952600  | 0.57337300  |
| C  | -3.21421700 | 0.65456700  | -0.06638500 | C   | 1.21837100  | 5.24956900  | -0.43690000 |
| N  | -2.30862100 | 1.54901600  | 0.40930400  | H   | 3.18262100  | 5.38826500  | -1.26977500 |
| H  | -1.85113800 | 1.37234600  | 1.31597400  | C   | -1.92059400 | 3.86719600  | 1.03309600  |
| O  | -3.62041100 | 0.67061100  | -1.24016600 | H   | -2.31015500 | 1.76653400  | 1.31014800  |
| C  | -1.85709200 | 2.64386600  | -0.38217700 | H   | -1.22784100 | 5.86305700  | 0.64721800  |
| C  | -1.01628700 | 2.44236000  | -1.51638500 | H   | 1.05448400  | 6.32063600  | -0.38155900 |

|    |             |             |             |     |             |             |             |
|----|-------------|-------------|-------------|-----|-------------|-------------|-------------|
| H  | -2.85963000 | 4.15734100  | 1.49029000  | H   | 1.95703600  | -0.65615800 | 5.48306100  |
| N  | -0.50444900 | 2.05679300  | 0.35538100  | H   | 0.25807900  | -2.53761800 | 5.60150700  |
| Co | 0.10459900  | 0.19640700  | 0.07761800  | H   | 2.95176500  | 1.21284200  | 4.14588600  |
| O  | -0.69494200 | 0.27781100  | -1.65994800 | N   | 0.66589600  | 0.17584000  | 1.92771100  |
| O  | -1.29235000 | -1.88718200 | -1.91918500 |     |             |             |             |
| C  | -1.17804800 | -0.72256100 | -2.33517600 | D_T |             |             |             |
| O  | 0.77678900  | -1.57328700 | -0.13050200 | C   | -2.30420900 | -0.55797900 | 3.94809800  |
| O  | 2.61989600  | -1.70943900 | 1.18442500  | C   | -3.16886100 | -1.64176400 | 4.12232400  |
| C  | 1.74728800  | -2.20637600 | 0.46368100  | C   | -4.07953700 | -1.98226500 | 3.11630500  |
| C  | 1.70479700  | -3.69859600 | 0.19125700  | C   | -4.11976100 | -1.24633100 | 1.93440400  |
| H  | 1.51114700  | -3.88839800 | -0.86710200 | C   | -3.22859100 | -0.18234300 | 1.74272300  |
| H  | 2.64243200  | -4.16822700 | 0.49323300  | C   | -2.33307400 | 0.16933500  | 2.76006900  |
| H  | 0.88092300  | -4.13641600 | 0.76671900  | H   | -1.60455300 | -0.28469200 | 4.73215700  |
| C  | -1.65907000 | -0.34250800 | -3.71990100 | H   | -3.13784200 | -2.21856100 | 5.04213300  |
| H  | -1.93801200 | -1.23384300 | -4.28359600 | H   | -4.75320300 | -2.82265400 | 3.25431000  |
| H  | -2.53352400 | 0.30969900  | -3.62306400 | H   | -4.81248200 | -1.50599000 | 1.14076800  |
| H  | -0.88677000 | 0.21656000  | -4.25570800 | H   | -1.66464500 | 1.00807600  | 2.61053300  |
| C  | -4.82176900 | -1.70526100 | -2.09830700 | C   | -3.28061500 | 0.58684500  | 0.47039800  |
| C  | -5.43540200 | -0.52061700 | -2.51069600 | N   | -2.08936700 | 1.16174600  | 0.03688000  |
| C  | -5.20437700 | 0.66998500  | -1.81527600 | O   | -4.35023200 | 0.73809000  | -0.13036800 |
| C  | -4.36505000 | 0.67498000  | -0.70420800 | C   | -2.11038800 | 2.40643900  | -0.59887300 |
| C  | -3.71891500 | -0.50734500 | -0.31303800 | C   | -0.87633100 | 2.76548400  | -1.20110700 |
| C  | -3.95265300 | -1.70026500 | -1.00891500 | C   | -3.14072700 | 3.34026500  | -0.63095700 |
| H  | -5.01316900 | -2.63277200 | -2.62860100 | C   | -0.67026300 | 4.02304600  | -1.82622900 |
| H  | -6.09816900 | -0.52522200 | -3.37091500 | C   | -2.94143000 | 4.59750100  | -1.24627900 |
| H  | -5.68445800 | 1.59032900  | -2.13287800 | H   | -4.09997400 | 3.11090800  | -0.18668400 |
| H  | -4.19277200 | 1.59148900  | -0.15027500 | C   | 1.28623900  | 2.04638200  | -1.71453900 |
| H  | -3.47263000 | -2.61876000 | -0.69178100 | C   | 0.60354600  | 4.25322500  | -2.40184000 |
| C  | -2.86781800 | -0.47468400 | 0.90149900  | C   | -1.74404200 | 4.94865600  | -1.83568200 |
| N  | -1.54731200 | -1.01331600 | 0.81125400  | H   | -3.76800900 | 5.30175300  | -1.25048200 |
| H  | -1.42909100 | -1.65430200 | 0.00532400  | C   | 1.56992000  | 3.27129800  | -2.34854400 |
| O  | -3.24622600 | 0.03535900  | 1.94669000  | H   | 2.01273800  | 1.24429000  | -1.68653300 |
| C  | -1.03138800 | -1.50595700 | 2.07603600  | H   | 0.80293000  | 5.20352600  | -2.88809500 |
| C  | 0.05365700  | -0.81078000 | 2.65368600  | H   | -1.60904700 | 5.91571200  | -2.30874700 |
| C  | -1.60947100 | -2.56276700 | 2.74021300  | H   | 2.54877500  | 3.41592600  | -2.79097100 |
| C  | 0.51771700  | -1.16962100 | 3.94852700  | N   | 0.10657100  | 1.82027000  | -1.15425700 |
| C  | -1.12744200 | -2.95002900 | 4.01296100  | Co  | -0.42751800 | 0.19644300  | -0.21295000 |
| H  | -2.44784000 | -3.08513200 | 2.29043100  | O   | 0.63723100  | 0.94572000  | 1.28617500  |
| C  | 1.66270700  | 0.86490900  | 2.45794900  | O   | 1.12806800  | -0.82220900 | 2.60130100  |
| C  | 1.58456300  | -0.41247900 | 4.49283000  | C   | 0.97666800  | 0.39983200  | 2.41287000  |
| C  | -0.09910500 | -2.25911000 | 4.61515200  | O   | -0.89717300 | -1.44373500 | 0.56623800  |
| H  | -1.59215300 | -3.78932300 | 4.51927400  | O   | -2.49468700 | -1.92359500 | -0.94919700 |
| C  | 2.13570500  | 0.61341000  | 3.76002000  | C   | -1.76475200 | -2.23892200 | -0.00272500 |
| H  | 2.13301100  | 1.61449400  | 1.83484000  | C   | -1.77573300 | -3.62732100 | 0.59630800  |



|       |             |             |             |    |             |             |             |
|-------|-------------|-------------|-------------|----|-------------|-------------|-------------|
| H     | -1.67456400 | -3.58027500 | 1.68264300  | C  | -3.21685000 | 0.44558700  | 1.51850000  |
| H     | -2.69492700 | -4.14780800 | 0.32269900  | C  | -2.46459500 | 0.59266300  | 2.69005000  |
| H     | -0.91790000 | -4.18252400 | 0.19961300  | H  | -2.30864100 | 0.12160500  | 4.78424900  |
| C     | 1.21381200  | 1.38795000  | 3.53525400  | H  | -4.39819500 | -1.22498100 | 4.81954100  |
| H     | 1.57918300  | 0.87861300  | 4.42797200  | H  | -5.74874200 | -1.47323500 | 2.74745400  |
| H     | 1.94128500  | 2.13884300  | 3.21357300  | H  | -4.99467500 | -0.38537300 | 0.64137500  |
| H     | 0.27998800  | 1.91186900  | 3.76532000  | H  | -1.55144600 | 1.17263000  | 2.66090400  |
| C     | 4.69408300  | 0.52733900  | 2.96934300  | C  | -2.82715100 | 1.14199600  | 0.25908200  |
| C     | 5.02806400  | 1.84798400  | 2.66238900  | N  | -1.48502200 | 1.42614000  | 0.04997800  |
| C     | 4.76545400  | 2.35636600  | 1.38683900  | O  | -3.71262300 | 1.52718500  | -0.51952700 |
| C     | 4.16909900  | 1.54654300  | 0.42309600  | C  | -1.14476700 | 2.65646100  | -0.49488900 |
| C     | 3.80275800  | 0.23027400  | 0.73646100  | C  | 0.15972800  | 2.73768500  | -1.05448900 |
| C     | 4.07866200  | -0.27930000 | 2.01263500  | C  | -1.91649400 | 3.81914600  | -0.49205600 |
| H     | 4.91191100  | 0.12395300  | 3.95349800  | C  | 0.65045000  | 3.93650900  | -1.64634800 |
| H     | 5.49874000  | 2.47752400  | 3.41181400  | C  | -1.41149000 | 5.02003100  | -1.02957800 |
| H     | 5.03039400  | 3.38072000  | 1.14278300  | H  | -2.91826000 | 3.80144200  | -0.08254400 |
| H     | 3.97920200  | 1.92953600  | -0.57326500 | C  | 2.03968900  | 1.53904600  | -1.71841800 |
| H     | 3.82509200  | -1.30525800 | 2.25406400  | C  | 1.91589200  | 3.87436400  | -2.27955600 |
| C     | 3.16401500  | -0.60585400 | -0.32438400 | C  | -0.15839300 | 5.09703400  | -1.60511000 |
| N     | 2.25685000  | -1.52450900 | 0.09978000  | H  | -2.04351900 | 5.90283700  | -0.99819800 |
| H     | 1.87483000  | -1.45684700 | 1.05352000  | C  | 2.59017300  | 2.67637300  | -2.33821600 |
| O     | 3.45705800  | -0.46182800 | -1.52322200 | H  | 2.55611800  | 0.59398400  | -1.78316400 |
| C     | 1.71008600  | -2.48661700 | -0.79263500 | H  | 2.32630500  | 4.76965800  | -2.73693400 |
| C     | 0.77928600  | -2.13162000 | -1.81056700 | H  | 0.21028400  | 6.01893300  | -2.04228300 |
| C     | 2.14454800  | -3.79331500 | -0.69007400 | H  | 3.54250000  | 2.58226000  | -2.84691900 |
| C     | 0.42614100  | -3.12051500 | -2.78164800 | N  | 0.89140400  | 1.58042700  | -1.05448400 |
| C     | 1.71979300  | -4.78881500 | -1.59574700 | Co | -0.04224900 | 0.11916000  | -0.13119300 |
| H     | 2.85227600  | -4.03890800 | 0.09494000  | O  | 0.54467700  | 0.66151700  | 1.64353000  |
| C     | -0.54305100 | -0.55598300 | -2.91915500 | O  | 1.24097300  | -1.39115100 | 2.24144900  |
| C     | -0.39319100 | -2.73733000 | -3.87186300 | C  | 0.94154400  | -0.17680100 | 2.51037700  |
| C     | 0.89950900  | -4.44980500 | -2.64533000 | O  | -0.99688000 | -1.29240500 | 0.71977000  |
| H     | 2.07915200  | -5.80589300 | -1.48030800 | O  | -2.72659400 | -1.82804300 | -0.64559500 |
| C     | -0.83908400 | -1.44249600 | -3.96767900 | C  | -2.01650600 | -2.01175100 | 0.34896700  |
| H     | -0.97816100 | 0.43704200  | -2.91933400 | C  | -2.26633200 | -3.17231400 | 1.29460200  |
| H     | -0.65347500 | -3.47928200 | -4.62058100 | H  | -2.24267800 | -2.82819500 | 2.33154200  |
| H     | 0.60355200  | -5.18377000 | -3.38819000 | H  | -3.22679600 | -3.64218900 | 1.07709500  |
| H     | -1.45415700 | -1.10258600 | -4.79230200 | H  | -1.46548100 | -3.90970000 | 1.16864100  |
| N     | 0.21101900  | -0.87806000 | -1.87048500 | C  | 1.06897500  | 0.27265300  | 3.93400800  |
|       |             |             |             | H  | 0.24264700  | -0.16254700 | 4.50707200  |
| TSC_S |             |             |             | H  | 2.00606600  | -0.09893900 | 4.35472400  |
| C     | -2.89192400 | -0.00286300 | 3.87663300  | H  | 1.02139300  | 1.35943600  | 4.00375200  |
| C     | -4.07003400 | -0.75348000 | 3.89763700  | C  | 5.28869700  | -0.87092700 | 2.47486600  |
| C     | -4.83156500 | -0.89199700 | 2.73239300  | C  | 5.14649600  | 0.45365400  | 2.89590900  |
| C     | -4.41383900 | -0.28400700 | 1.55165400  | C  | 4.24736900  | 1.29559300  | 2.24038500  |

|     |             |             |             |   |             |             |             |
|-----|-------------|-------------|-------------|---|-------------|-------------|-------------|
| C   | 3.47364600  | 0.81749200  | 1.18129000  | H | 0.07256900  | -4.48887700 | -2.43287400 |
| C   | 3.60352600  | -0.51241500 | 0.76706300  | H | -1.16219400 | -2.58268600 | -1.40433100 |
| C   | 4.53260200  | -1.34766300 | 1.40651300  | C | 2.07339900  | 2.11175500  | 0.08790600  |
| H   | 5.99061700  | -1.53173300 | 2.97455500  | C | 1.33787200  | 3.34006000  | -0.28873600 |
| H   | 5.73819200  | 0.82832200  | 3.72581100  | C | 1.58912400  | 4.51735200  | 0.43184000  |
| H   | 4.14117600  | 2.33026900  | 2.55219200  | C | 0.40051800  | 3.34639200  | -1.33232000 |
| H   | 2.77377800  | 1.48211000  | 0.69698400  | C | 0.90419800  | 5.68617900  | 0.11558300  |
| H   | 4.64325400  | -2.37489400 | 1.07298400  | C | -0.28029200 | 4.51953400  | -1.64934600 |
| C   | 2.84870100  | -1.14491400 | -0.36914000 | C | -0.03196900 | 5.68804000  | -0.92414200 |
| N   | 1.45711300  | -1.33340600 | -0.23203200 | H | 0.20468800  | 2.43593600  | -1.88745800 |
| H   | 1.26382200  | -1.51255700 | 1.04361100  | H | 1.09232200  | 6.59412200  | 0.68009000  |
| O   | 3.48202000  | -1.58313100 | -1.32833500 | H | -1.00605500 | 4.52171700  | -2.45675100 |
| C   | 0.92220800  | -2.26490400 | -1.19156400 | H | -0.56830700 | 6.60045500  | -1.16767200 |
| C   | -0.06132800 | -1.77872500 | -2.08247700 | O | 3.00564300  | 2.10913400  | 0.88945900  |
| C   | 1.33842500  | -3.57475300 | -1.30566800 | H | 4.30802600  | 1.09025000  | -0.87120600 |
| C   | -0.55979800 | -2.58755500 | -3.13875800 | C | -2.70976600 | -1.45227000 | 0.77609600  |
| C   | 0.81589300  | -4.40522500 | -2.32549000 | C | -3.69094700 | -2.16008200 | 1.46453200  |
| H   | 2.08858600  | -3.96059400 | -0.62351500 | C | -5.03969600 | -2.14227600 | 1.04761900  |
| C   | -1.43347300 | 0.00970600  | -2.69305600 | C | -5.44389700 | -1.43155700 | -0.06175200 |
| C   | -1.50498000 | -1.99934900 | -4.01553600 | C | -4.48631800 | -0.68869100 | -0.79632400 |
| C   | -0.09538400 | -3.92312700 | -3.24075300 | C | -3.12402800 | -0.69024800 | -0.37220200 |
| H   | 1.16026100  | -5.43219200 | -2.39215900 | N | -2.17422700 | 0.02334100  | -1.05225600 |
| C   | -1.91499700 | -0.70122000 | -3.80939400 | C | -2.51098800 | 0.71866500  | -2.12661300 |
| H   | -1.80834300 | 0.99744500  | -2.45815400 | C | -3.83082100 | 0.76298900  | -2.62006100 |
| H   | -1.90041400 | -2.58440100 | -4.84032200 | C | -4.81209400 | 0.06713800  | -1.95115500 |
| H   | -0.47512600 | -4.55306100 | -4.03882100 | N | -1.35538100 | -1.39171200 | 1.11381000  |
| H   | -2.63382700 | -0.22263400 | -4.46405000 | H | -5.76807400 | -2.70822300 | 1.62149700  |
| N   | -0.54997900 | -0.51956400 | -1.86348400 | H | -6.48017200 | -1.42737700 | -0.38510400 |
|     |             |             |             | H | -5.84250200 | 0.08610400  | -2.29464000 |
| E_Q |             |             |             | H | -4.05203200 | 1.34694000  | -3.50651500 |
| C   | 2.43407900  | 0.00035700  | -0.97516100 | H | -1.71450600 | 1.26984900  | -2.61848500 |
| C   | 3.83756700  | 0.15973100  | -1.16015300 | C | -0.71812300 | -2.47847700 | 1.60933400  |
| C   | 4.60320000  | -0.86999200 | -1.70017800 | C | 0.76322000  | -2.30239800 | 1.81541400  |
| C   | 4.02682100  | -2.07607800 | -2.08991600 | C | 1.61520300  | -3.33801600 | 1.40720400  |
| C   | 2.62567100  | -2.28528800 | -1.95005100 | C | 1.31889200  | -1.12506800 | 2.33587000  |
| C   | 1.83012400  | -1.25632000 | -1.39108500 | C | 2.99809800  | -3.17071500 | 1.45283100  |
| N   | 0.50204600  | -1.38521100 | -1.20829300 | C | 2.70413300  | -0.96493000 | 2.39698600  |
| C   | -0.09391700 | -2.51756100 | -1.57818800 | C | 3.54660300  | -1.97958900 | 1.93945800  |
| C   | 0.60817600  | -3.58968900 | -2.15075700 | H | 0.67148800  | -0.32030300 | 2.66650300  |
| C   | 1.97386800  | -3.47913800 | -2.33099200 | H | 3.64975400  | -3.96405500 | 1.09816700  |
| N   | 1.59575400  | 0.91814300  | -0.49038100 | H | 3.11953600  | -0.03846400 | 2.78049600  |
| H   | 5.67124000  | -0.72427200 | -1.82216200 | H | 4.62419900  | -1.84632500 | 1.96283600  |
| H   | 4.63676500  | -2.86890900 | -2.51076300 | O | -1.22355900 | -3.60685200 | 1.81477400  |
| H   | 2.55259500  | -4.29253500 | -2.75740900 | H | -3.41129700 | -2.73556600 | 2.33650100  |

|     |             |             |             |     |             |             |             |
|-----|-------------|-------------|-------------|-----|-------------|-------------|-------------|
| Co  | -0.39113300 | 0.15771000  | 0.06961300  | C   | -2.41403600 | 4.58295400  | 0.97382800  |
| C   | -0.67988100 | 2.40446200  | 1.97714100  | C   | -2.08186900 | 3.32048900  | 1.53011000  |
| O   | -1.23054300 | 1.73175300  | 1.01821600  | C   | -1.27027100 | 2.44962500  | 0.76059900  |
| O   | 0.36053000  | 2.06461300  | 2.57156000  | N   | -0.91595200 | 1.21282500  | 1.23253600  |
| C   | -1.40568100 | 3.68184000  | 2.35806100  | C   | -1.26278700 | 0.82052800  | 2.44948900  |
| H   | 2.30992600  | 4.49569600  | 1.24175200  | C   | -2.04960200 | 1.64328800  | 3.27827500  |
| H   | 1.18354800  | -4.25440800 | 1.01845400  | C   | -2.47401700 | 2.87106900  | 2.81598700  |
| H   | -0.83148100 | 4.25708800  | 3.08635100  | N   | 0.08878800  | 1.83871600  | -1.05172500 |
| H   | -2.38286900 | 3.43026800  | 2.78540100  | H   | -2.17878800 | 5.89256300  | -0.69516900 |
| H   | -1.58456100 | 4.28760900  | 1.46508900  | H   | -3.03755700 | 5.26505500  | 1.54240800  |
|     |             |             |             | H   | -3.09657000 | 3.51035600  | 3.43456100  |
| E_S |             |             |             | H   | -2.31596200 | 1.28613400  | 4.26609900  |
| C   | 1.41308000  | -1.93217700 | 1.07640200  | H   | -0.91515100 | -0.15267000 | 2.77176100  |
| C   | 1.96337800  | -3.14507100 | 1.48195900  | C   | 1.05695700  | 2.08688900  | -1.97386000 |
| C   | 3.24880100  | -3.19361700 | 2.06592900  | C   | 2.00614300  | 0.94201400  | -2.15499700 |
| C   | 4.00458500  | -2.05813900 | 2.27461500  | C   | 3.37841800  | 1.21486500  | -2.14125200 |
| C   | 3.48027900  | -0.80031500 | 1.88606400  | C   | 1.56374100  | -0.39135300 | -2.16243200 |
| C   | 2.19983900  | -0.76376300 | 1.27092500  | C   | 4.29536600  | 0.16602200  | -2.07855100 |
| N   | 1.65327700  | 0.40956000  | 0.83156400  | C   | 2.48881300  | -1.43962800 | -2.09969600 |
| C   | 2.28878100  | 1.55789600  | 1.03100300  | C   | 3.85352100  | -1.16194800 | -2.04352700 |
| C   | 3.54759500  | 1.60641200  | 1.65564500  | H   | 0.50703500  | -0.62827900 | -2.30600700 |
| C   | 4.14710600  | 0.43550500  | 2.06684900  | H   | 5.35870300  | 0.38351900  | -2.04041100 |
| N   | 0.12638000  | -1.70287100 | 0.57401500  | H   | 2.13021700  | -2.46399600 | -2.08236000 |
| H   | 3.64145900  | -4.16179600 | 2.36231900  | H   | 4.57352400  | -1.97198800 | -1.97773800 |
| H   | 4.98856600  | -2.10763800 | 2.72908000  | O   | 1.23534800  | 3.17759100  | -2.54596300 |
| H   | 5.12722800  | 0.44646500  | 2.53414300  | H   | -0.70304000 | 4.38063900  | -1.97825800 |
| H   | 4.02969300  | 2.56783400  | 1.78900600  | Co  | -0.04930200 | 0.16754100  | -0.08813300 |
| H   | 1.80487600  | 2.46030100  | 0.67957800  | C   | -2.13726900 | -0.53489200 | -1.99257600 |
| C   | -0.54911500 | -2.75654800 | -0.01367800 | O   | -1.81290700 | -0.00153900 | -0.85513700 |
| C   | -2.03816300 | -2.77404200 | 0.08323200  | O   | -1.37309200 | -1.16050200 | -2.74396100 |
| C   | -2.76773600 | -3.47558900 | -0.88702700 | C   | -3.59076700 | -0.31208000 | -2.36177700 |
| C   | -2.71436900 | -2.17817700 | 1.15397800  | H   | -2.23689200 | -3.94008400 | -1.71079900 |
| C   | -4.15581300 | -3.55138800 | -0.80324000 | H   | 3.71586700  | 2.24630100  | -2.13453800 |
| C   | -4.10284900 | -2.26396300 | 1.24548800  | H   | -3.89185900 | -0.99911600 | -3.15413700 |
| C   | -4.82670200 | -2.94450000 | 0.26319900  | H   | -3.70757000 | 0.71769200  | -2.71902200 |
| H   | -2.14859600 | -1.66090700 | 1.91717000  | H   | -4.23376400 | -0.43886400 | -1.48812200 |
| H   | -4.71604600 | -4.08139700 | -1.56774600 |     |             |             |             |
| H   | -4.61837500 | -1.80286400 | 2.08284100  | E_T |             |             |             |
| H   | -5.90906700 | -3.00613400 | 0.33007500  | C   | -1.91581100 | 1.62416100  | 0.82508900  |
| O   | 0.02998400  | -3.70217400 | -0.57501600 | C   | -2.83914500 | 2.65883100  | 0.92867200  |
| H   | 1.40849700  | -4.06388200 | 1.34759100  | C   | -4.12930100 | 2.41410300  | 1.45677200  |
| C   | -0.74659400 | 2.81847400  | -0.51211700 | C   | -4.52086800 | 1.17002700  | 1.90450600  |
| C   | -1.08614300 | 4.06598900  | -1.01848400 | C   | -3.60285300 | 0.09088700  | 1.83174100  |
| C   | -1.92619800 | 4.92592700  | -0.26983500 | C   | -2.32641600 | 0.33813300  | 1.26626000  |

|   |             |             |             |       |             |             |             |
|---|-------------|-------------|-------------|-------|-------------|-------------|-------------|
| N | -1.40743400 | -0.65752000 | 1.11540300  | C     | -3.07942700 | 0.72993000  | -2.12884400 |
| C | -1.66000200 | -1.88194500 | 1.56633500  | C     | -4.34051000 | 0.22668400  | -1.80972900 |
| C | -2.88696100 | -2.19674000 | 2.17269800  | H     | -0.97912000 | 0.29943400  | -2.31814900 |
| C | -3.86119200 | -1.22418000 | 2.28462500  | H     | -5.46347300 | -1.51372100 | -1.20315800 |
| N | -0.57176900 | 1.68111900  | 0.42474800  | H     | -2.95558300 | 1.77213300  | -2.40699300 |
| H | -4.82421900 | 3.24665800  | 1.51151500  | H     | -5.21039500 | 0.87608100  | -1.83706500 |
| H | -5.51063600 | 1.00180700  | 2.31571200  | O     | -0.98364900 | -3.53795100 | -1.80027000 |
| H | -4.82784900 | -1.45570100 | 2.72168000  | H     | 1.37403700  | -3.78081400 | -2.35872900 |
| H | -3.05555900 | -3.20865300 | 2.52190700  | Co    | 0.12408500  | -0.09147000 | 0.07926100  |
| H | -0.89160200 | -2.63155200 | 1.42247600  | C     | 1.78692600  | 0.98489800  | -1.99760500 |
| C | -0.08454500 | 2.84150500  | -0.16767700 | O     | 1.71432000  | 0.44205100  | -0.82027800 |
| C | 1.34442700  | 3.17076300  | 0.08941200  | O     | 0.82024900  | 1.35256600  | -2.67986600 |
| C | 2.02023300  | 3.99598100  | -0.81974100 | C     | 3.20975200  | 1.11975100  | -2.50182100 |
| C | 2.01097400  | 2.70220700  | 1.22900000  | H     | 1.49479800  | 4.35254900  | -1.69919700 |
| C | 3.35742000  | 4.32227500  | -0.60649000 | H     | -3.46850000 | -2.99181900 | -1.10442400 |
| C | 3.34557300  | 3.03710200  | 1.44680100  | H     | 3.25586800  | 1.84541800  | -3.31551100 |
| C | 4.02294000  | 3.84070000  | 0.52526100  | H     | 3.53978800  | 0.14356700  | -2.87600100 |
| H | 1.47777800  | 2.07991700  | 1.93732300  | H     | 3.88161000  | 1.41505400  | -1.69316700 |
| H | 3.88347100  | 4.94634200  | -1.32264400 |       |             |             |             |
| H | 3.85734400  | 2.67058100  | 2.33174900  | TSD_S |             |             |             |
| H | 5.06611700  | 4.09446000  | 0.68990300  | C     | -1.05883900 | -1.99324000 | -1.36837800 |
| O | -0.78998700 | 3.59772900  | -0.84647300 | C     | -1.30743300 | -3.17185900 | -2.07009200 |
| H | -2.58095800 | 3.65619800  | 0.60248800  | C     | -2.55222000 | -3.39353700 | -2.69533700 |
| C | 1.35275700  | -2.48998500 | -0.65103100 | C     | -3.57331800 | -2.46601200 | -2.64302800 |
| C | 1.88029800  | -3.49812200 | -1.44569300 | C     | -3.36619500 | -1.25311900 | -1.94326300 |
| C | 3.06972700  | -4.16282800 | -1.06875900 | C     | -2.11032000 | -1.03755800 | -1.30843700 |
| C | 3.74350900  | -3.84294700 | 0.09085500  | N     | -1.85429000 | 0.10751700  | -0.60734300 |
| C | 3.24479700  | -2.81172000 | 0.92678100  | C     | -2.77216000 | 1.06105300  | -0.53236900 |
| C | 2.05383400  | -2.13514200 | 0.54492400  | C     | -4.03506200 | 0.92574900  | -1.14012200 |
| N | 1.53665700  | -1.12116000 | 1.29822000  | C     | -4.33452100 | -0.22446200 | -1.83405400 |
| C | 2.12626100  | -0.76655900 | 2.42699300  | N     | 0.15309100  | -1.59541500 | -0.79663500 |
| C | 3.29940600  | -1.39776800 | 2.89149500  | H     | -2.69964400 | -4.32534300 | -3.23370300 |
| C | 3.85972600  | -2.40613900 | 2.13872600  | H     | -4.52757700 | -2.64481800 | -3.12772000 |
| N | 0.18474500  | -1.75866600 | -0.90261200 | H     | -5.30373700 | -0.35595900 | -2.30595900 |
| H | 3.45171900  | -4.94672600 | -1.71581100 | H     | -4.75052300 | 1.73441500  | -1.04464300 |
| H | 4.64980500  | -4.36689900 | 0.37782900  | H     | -2.51628800 | 1.95452300  | 0.02054900  |
| H | 4.77123300  | -2.90125800 | 2.46079400  | C     | 1.00862000  | -2.57908800 | -0.36224100 |
| H | 3.74549300  | -1.07192000 | 3.82429100  | C     | 2.47016500  | -2.27280100 | -0.30146200 |
| H | 1.66944900  | 0.04439900  | 2.98542100  | C     | 3.25672300  | -2.93448200 | 0.65203500  |
| C | -0.91080100 | -2.33692500 | -1.48715400 | C     | 3.08599100  | -1.43137800 | -1.23524500 |
| C | -2.09304200 | -1.43804500 | -1.67616100 | C     | 4.63542700  | -2.73693600 | 0.68684200  |
| C | -3.36784000 | -1.95179900 | -1.39689300 | C     | 4.46817200  | -1.24847600 | -1.21343400 |
| C | -1.95772900 | -0.09954100 | -2.06584800 | C     | 5.24474200  | -1.89579900 | -0.24907100 |
| C | -4.48274600 | -1.11879000 | -1.45141500 | H     | 2.48272000  | -0.93100400 | -1.98166400 |

|    |             |             |             |     |             |                         |
|----|-------------|-------------|-------------|-----|-------------|-------------------------|
| H  | 5.23551500  | -3.23943500 | 1.43969300  |     |             |                         |
| H  | 4.93866200  | -0.60193500 | -1.94848400 | F_Q |             |                         |
| H  | 6.32045400  | -1.74703900 | -0.22734800 | C   | 2.60869300  | 0.42937600 -1.26819600  |
| O  | 0.64354200  | -3.73301600 | -0.06118600 | C   | 3.79385800  | 0.99554100 -1.73460000  |
| H  | -0.53774600 | -3.92875600 | -2.14174100 | C   | 4.86305600  | 0.18508400 -2.17425400  |
| C  | 0.08711600  | 2.89804900  | 0.47604200  | C   | 4.78814700  | -1.19216100 -2.15646700 |
| C  | 0.14878300  | 4.20523400  | 0.94496300  | C   | 3.60373400  | -1.81542100 -1.68781200 |
| C  | 0.63900300  | 5.23473700  | 0.10709100  | C   | 2.52381800  | -0.99887700 -1.25123600 |
| C  | 1.05134300  | 4.99615700  | -1.18754100 | N   | 1.36762300  | -1.54120000 -0.78477000 |
| C  | 0.99428700  | 3.67673800  | -1.70656500 | C   | 1.21911400  | -2.85748800 -0.73137400 |
| C  | 0.52847000  | 2.63849200  | -0.85851700 | C   | 2.23084000  | -3.73889700 -1.15524400 |
| N  | 0.45389600  | 1.34272800  | -1.29197000 | C   | 3.41858100  | -3.21869000 -1.62703900 |
| C  | 0.76592700  | 1.03405600  | -2.53941700 | N   | 1.45401800  | 1.11421400 -0.88738400  |
| C  | 1.22115700  | 2.01029200  | -3.44891300 | H   | 5.76427700  | 0.67107100 -2.53597400  |
| C  | 1.35003800  | 3.31723600  | -3.03163800 | H   | 5.61507400  | -1.80735900 -2.49663100 |
| N  | -0.38618600 | 1.76436700  | 1.12197800  | H   | 4.22188100  | -3.87295100 -1.95321600 |
| H  | 0.67951000  | 6.24471900  | 0.50426300  | H   | 2.06463800  | -4.80876800 -1.09923500 |
| H  | 1.41002400  | 5.80058600  | -1.82158600 | H   | 0.27716100  | -3.22212400 -0.33482900 |
| H  | 1.71134000  | 4.08427700  | -3.71023400 | C   | 1.54928200  | 2.42767300 -0.47991500  |
| H  | 1.47038000  | 1.71232600  | -4.46090300 | C   | 0.31246800  | 3.24978300 -0.61920200  |
| H  | 0.65760800  | -0.00604200 | -2.82383900 | C   | 0.06416100  | 4.26466600 0.31454900   |
| C  | -1.12037300 | 1.73087500  | 2.26114900  | C   | -0.58098500 | 3.04887300 -1.67807100  |
| C  | -1.61831800 | 0.34696900  | 2.51799600  | C   | -1.08889000 | 5.03988300 0.21366200   |
| C  | -2.75554600 | 0.12884600  | 3.29117700  | C   | -1.72375500 | 3.83920400 -1.79079700  |
| C  | -0.97548200 | -0.71487100 | 1.83535800  | C   | -1.98530300 | 4.82746100 -0.83905600  |
| C  | -3.28773000 | -1.16058000 | 3.37567400  | H   | -0.37511800 | 2.27689400 -2.40950500  |
| C  | -1.53470200 | -2.00051600 | 1.92923500  | H   | -1.29041000 | 5.80951000 0.95269500   |
| C  | -2.68230800 | -2.22106100 | 2.69327600  | H   | -2.41106700 | 3.68131900 -2.61667700  |
| H  | 0.31514800  | -0.78742900 | 2.07056100  | H   | -2.88244300 | 5.43449600 -0.91788800  |
| H  | -4.18063000 | -1.33842000 | 3.96802500  | O   | 2.57346700  | 2.93760600 0.00784600   |
| H  | -1.05583600 | -2.83359300 | 1.42316900  | H   | 3.89921400  | 2.07170400 -1.76701500  |
| H  | -3.10405600 | -3.21967800 | 2.76323500  | C   | -2.31748300 | -1.88196900 0.47695300  |
| O  | -1.42355000 | 2.71009300  | 2.97068600  | C   | -3.35560300 | -2.63211900 1.03165000  |
| H  | -0.18413800 | 4.43027400  | 1.94815800  | C   | -4.48565800 | -2.98935200 0.26232300  |
| Co | -0.07865900 | 0.14747900  | 0.16109500  | C   | -4.61427600 | -2.62904700 -1.06186200 |
| C  | 2.20381100  | -0.09290700 | 1.83372300  | C   | -3.58612900 | -1.86741900 -1.67326600 |
| O  | 1.76567300  | 0.35223200  | 0.73038100  | C   | -2.45224000 | -1.48671900 -0.89960200 |
| O  | 1.49997000  | -0.81926500 | 2.60640200  | N   | -1.44397800 | -0.74341300 -1.43973800 |
| C  | 3.59178900  | 0.29277400  | 2.25296200  | C   | -1.49024000 | -0.39188300 -2.71565300 |
| H  | -3.23116000 | 0.96454600  | 3.79575100  | C   | -2.56822800 | -0.73448200 -3.55570500 |
| H  | 2.77456600  | -3.59337800 | 1.36649100  | C   | -3.61476000 | -1.46006300 -3.03105000 |
| H  | 3.52246400  | 1.23546400  | 2.80866400  | N   | -1.14834500 | -1.45601700 1.08042600  |
| H  | 4.01986800  | -0.46649300 | 2.90799000  | H   | -5.26941000 | -3.57177000 0.73901700  |
| H  | 4.22397100  | 0.45009300  | 1.37884200  | H   | -5.48216800 | -2.91759500 -1.64660300 |

|     |             |             |             |    |             |             |             |
|-----|-------------|-------------|-------------|----|-------------|-------------|-------------|
| H   | -4.46712700 | -1.73388200 | -3.64645500 | C  | -2.24993900 | 1.41792100  | -0.89506000 |
| H   | -2.55928400 | -0.41894100 | -4.59297100 | C  | -3.10947900 | 0.20183700  | -1.03626900 |
| H   | -0.64824600 | 0.17885700  | -3.09454500 | C  | -4.31627800 | 0.14517900  | -0.32526100 |
| C   | -0.75602600 | -1.82590400 | 2.31702800  | C  | -2.79330600 | -0.82504900 | -1.93374900 |
| C   | 0.54403700  | -1.19200900 | 2.70961700  | C  | -5.17638600 | -0.93976400 | -0.48291800 |
| C   | 1.17167700  | -1.53332500 | 3.91269100  | C  | -3.66478200 | -1.89929400 | -2.10994000 |
| C   | 1.12949200  | -0.25057900 | 1.85566800  | C  | -4.85348200 | -1.96337100 | -1.37887100 |
| C   | 2.38804600  | -0.93904600 | 4.25167000  | H  | -1.86992900 | -0.77731300 | -2.49592000 |
| C   | 2.34836300  | 0.33967300  | 2.18686200  | H  | -6.09932000 | -0.98610200 | 0.08759600  |
| C   | 2.97519600  | -0.00509100 | 3.39380200  | H  | -3.41538200 | -2.68638600 | -2.81558000 |
| H   | -0.07076800 | 1.35178100  | 2.26938800  | H  | -5.52741600 | -2.80529600 | -1.50788600 |
| H   | 2.87972100  | -1.20304900 | 5.18372900  | O  | -2.82552600 | 2.51658100  | -0.74930600 |
| H   | 2.81483200  | 1.07206600  | 1.53396800  | H  | -1.55302400 | 3.53747700  | -2.44592900 |
| H   | 3.92120300  | 0.45951800  | 3.66053300  | C  | 1.85987500  | -2.17760500 | 0.60352900  |
| O   | -1.34225300 | -2.61048600 | 3.09879000  | C  | 2.62226900  | -3.21049300 | 1.14288000  |
| H   | -3.28540300 | -2.94433000 | 2.06309700  | C  | 3.16795600  | -4.20736500 | 0.30159300  |
| Co  | 0.04284500  | -0.09394100 | -0.03677100 | C  | 2.98834100  | -4.19457200 | -1.06594700 |
| C   | -1.76423300 | 1.90784200  | 1.60976600  | C  | 2.22504700  | -3.15530100 | -1.65749000 |
| O   | -1.63401200 | 1.30931000  | 0.54162400  | C  | 1.65050200  | -2.16535000 | -0.81464500 |
| O   | -0.82279600 | 1.92893000  | 2.54614500  | N  | 0.89364600  | -1.14421900 | -1.31951400 |
| C   | -3.01156800 | 2.63972600  | 1.99129000  | C  | 0.72877000  | -1.02931600 | -2.62649000 |
| H   | -3.59674600 | 1.99084400  | 2.65363400  | C  | 1.27317700  | -1.96008200 | -3.53548200 |
| H   | -2.77076000 | 3.55320700  | 2.53795100  | C  | 2.00398900  | -3.02319200 | -3.05257100 |
| H   | -3.59791400 | 2.86542400  | 1.10131400  | N  | 1.27821400  | -1.10569300 | 1.26066700  |
| H   | 0.70100100  | -2.26327700 | 4.56531800  | H  | 3.75439100  | -4.99983500 | 0.75778500  |
| H   | 0.76746900  | 4.42033900  | 1.12595700  | H  | 3.42536600  | -4.95970800 | -1.69975000 |
|     |             |             |             | H  | 2.42676500  | -3.76119300 | -3.72818600 |
|     |             |             |             | H  | 1.10285700  | -1.82644700 | -4.59793400 |
| F_S |             |             |             | H  | 0.15024200  | -0.17733700 | -2.96707100 |
| C   | -0.12382500 | 2.37448500  | -1.34137000 | C  | 1.32705300  | -0.84183000 | 2.59113000  |
| C   | -0.52395700 | 3.45793500  | -2.12357800 | C  | 0.55962000  | 0.39707100  | 2.89922200  |
| C   | 0.39687300  | 4.45489500  | -2.50728000 | C  | 0.49846300  | 0.92854100  | 4.18782600  |
| C   | 1.72326800  | 4.41205200  | -2.12780100 | C  | -0.11171500 | 1.00241900  | 1.81412700  |
| C   | 2.17751200  | 3.33124100  | -1.33455700 | C  | -0.23772100 | 2.09348100  | 4.41406400  |
| C   | 1.24472200  | 2.32581800  | -0.95147000 | C  | -0.83699600 | 2.17404100  | 2.05476600  |
| N   | 1.62526300  | 1.25773200  | -0.18729800 | C  | -0.89971400 | 2.71164500  | 3.35120100  |
| C   | 2.88503100  | 1.13708100  | 0.20958600  | H  | -1.93256500 | 0.15469800  | 2.08995000  |
| C   | 3.86549300  | 2.08801500  | -0.13290100 | H  | -0.29577500 | 2.51708900  | 5.41244000  |
| C   | 3.51662400  | 3.17845600  | -0.89632700 | H  | -1.36784100 | 2.67402600  | 1.25066400  |
| N   | -0.89137900 | 1.26565400  | -0.97483900 | H  | -1.47130600 | 3.61957500  | 3.52592300  |
| H   | 0.03970400  | 5.27711500  | -3.12076000 | O  | 1.92877600  | -1.51055800 | 3.45689600  |
| H   | 2.42379600  | 5.18556300  | -2.42520700 | H  | 2.79965800  | -3.23969000 | 2.20831800  |
| H   | 4.25360500  | 3.92698100  | -1.17166600 | Co | 0.19694200  | 0.03684900  | 0.17517600  |
| H   | 4.88107900  | 1.94081400  | 0.21639800  | C  | -2.06543700 | -1.56630700 | 1.30908900  |
| H   | 3.13013600  | 0.27395700  | 0.81282800  |    |             |             |             |

|     |             |             |             |           |             |             |             |
|-----|-------------|-------------|-------------|-----------|-------------|-------------|-------------|
| O   | -1.18036100 | -1.36332700 | 0.46736800  | C         | -1.60210700 | -2.16448100 | -0.88392000 |
| O   | -2.46900000 | -0.66758200 | 2.18378300  | N         | -0.74486100 | -1.22076800 | -1.38095500 |
| C   | -2.74090100 | -2.89177600 | 1.42047400  | C         | -0.57785700 | -1.10221700 | -2.68893300 |
| H   | -2.20108300 | -3.47864700 | 2.17347600  | C         | -1.29127800 | -1.89521400 | -3.60885500 |
| H   | -3.77361100 | -2.77377100 | 1.75012700  | C         | -2.18946500 | -2.82878600 | -3.13722900 |
| H   | -2.69277800 | -3.41387400 | 0.46558300  | N         | -0.82293300 | -1.42444700 | 1.21928500  |
| H   | 1.02345500  | 0.42825900  | 4.99720700  | H         | -3.98988300 | -4.77703500 | 0.66351400  |
| H   | -4.56376500 | 0.95119500  | 0.35775800  | H         | -3.84125000 | -4.58793000 | -1.80498000 |
| F_T |             |             |             | H         | -2.75964900 | -3.44830500 | -3.82344600 |
| C   | 2.47745300  | 0.79149700  | -1.22612000 | H         | -1.12574300 | -1.75536900 | -4.67111000 |
| C   | 3.44343300  | 1.52069700  | -1.91590400 | H         | 0.13966600  | -0.35853100 | -3.01801000 |
| C   | 4.73243900  | 0.99366000  | -2.14669700 | C         | -0.59524500 | -1.41518400 | 2.56182100  |
| C   | 5.10011400  | -0.25737200 | -1.69788500 | C         | 0.36656600  | -0.33427500 | 2.90304200  |
| C   | 4.15371400  | -1.04068400 | -0.99371800 | C         | 0.80188500  | -0.10109800 | 4.20890600  |
| C   | 2.84796200  | -0.51393000 | -0.76849100 | C         | 0.82152900  | 0.45965600  | 1.83360600  |
| N   | 1.90658600  | -1.22898800 | -0.09741900 | C         | 1.70107000  | 0.93656300  | 4.45439100  |
| C   | 2.18251900  | -2.43497600 | 0.36605000  | C         | 1.72685600  | 1.49268400  | 2.08270800  |
| C   | 3.44612700  | -3.03523200 | 0.18499400  | C         | 2.15665800  | 1.72910300  | 3.39661700  |
| C   | 4.42392400  | -2.33915500 | -0.49006900 | H         | -0.96102800 | 1.72735100  | 2.00202200  |
| N   | 1.14520900  | 1.18337300  | -1.02808300 | H         | 2.04565000  | 1.13097400  | 5.46574400  |
| H   | 5.44750600  | 1.60194400  | -2.69323200 | H         | 2.09794800  | 2.12500500  | 1.28340000  |
| H   | 6.09562700  | -0.65270700 | -1.87371200 | H         | 2.85446900  | 2.53950300  | 3.59006300  |
| H   | 5.40912000  | -2.77003100 | -0.64427900 | O         | -1.09835700 | -2.18243000 | 3.40376900  |
| H   | 3.62747300  | -4.02872600 | 0.57994600  | H         | -2.61259700 | -3.35210200 | 2.14270200  |
| H   | 1.38652900  | -2.94540000 | 0.89988500  | Co        | 0.09287300  | -0.12027900 | 0.11893400  |
| C   | 0.85268900  | 2.51873000  | -0.95431600 | C         | -2.62747300 | 1.43330100  | 1.14542100  |
| C   | -0.57615700 | 2.90861100  | -1.16086600 | O         | -2.13041000 | 0.78500600  | 0.23201000  |
| C   | -1.12498500 | 3.92110000  | -0.36337500 | O         | -1.90238600 | 1.96569400  | 2.13368800  |
| C   | -1.34650500 | 2.34038800  | -2.18207100 | C         | -4.09711600 | 1.67641900  | 1.29539000  |
| C   | -2.44670600 | 4.32063500  | -0.54982400 | H         | -4.48158400 | 0.99926700  | 2.06701400  |
| C   | -2.65993900 | 2.76106100  | -2.38802600 | H         | -4.28693500 | 2.70111400  | 1.62102800  |
| C   | -3.21695800 | 3.74060600  | -1.56322200 | H         | -4.60456700 | 1.47244500  | 0.35308100  |
| H   | -0.91372900 | 1.57600800  | -2.81543700 | H         | 0.43041300  | -0.73029800 | 5.01318400  |
| H   | -2.87674400 | 5.08536600  | 0.09023900  | H         | -0.51603100 | 4.37154400  | 0.41403900  |
| H   | -3.24933700 | 2.32040000  | -3.18684500 | INT1_AQ_Q |             |             |             |
| H   | -4.24506000 | 4.05754800  | -1.71220100 | C         | -2.90574100 | -0.25798900 | 0.89781600  |
| O   | 1.68445900  | 3.42149200  | -0.72994100 | C         | -4.15250700 | -0.04532800 | 1.47965200  |
| H   | 3.20601900  | 2.50922300  | -2.28489700 | C         | -5.25723900 | -0.86041000 | 1.14507500  |
| C   | -1.67354600 | -2.28800900 | 0.54035800  | C         | -5.15345800 | -1.88777300 | 0.23161900  |
| C   | -2.54198800 | -3.23624300 | 1.07081600  | C         | -3.90389800 | -2.14151300 | -0.38962200 |
| C   | -3.32040600 | -4.04969400 | 0.21349400  | C         | -2.79011300 | -1.32597300 | -0.04853100 |
| C   | -3.24589100 | -3.95021000 | -1.15933800 | N         | -1.56749400 | -1.52510000 | -0.61972800 |
| C   | -2.36770400 | -2.99895400 | -1.74124400 | C         | -1.39074700 | -2.49318700 | -1.51049500 |

|   |             |             |             |           |             |             |             |
|---|-------------|-------------|-------------|-----------|-------------|-------------|-------------|
| C | -2.43825500 | -3.34833500 | -1.89637800 | H         | -0.88068800 | 3.70975500  | -4.57474100 |
| C | -3.68841700 | -3.16974700 | -1.33977700 | H         | -2.48953900 | 2.11962700  | -0.91553800 |
| N | -1.71832400 | 0.42493500  | 1.17069000  | H         | -2.66517000 | 3.65353400  | -2.84827200 |
| H | -6.20945300 | -0.66299300 | 1.62821200  | O         | 2.54619400  | 0.45394900  | -3.17730000 |
| H | -6.00752800 | -2.50839400 | -0.01994800 | H         | 3.85453800  | -1.20319600 | -2.49127700 |
| H | -4.51879200 | -3.81015100 | -1.62258400 | Co        | -0.18670500 | -0.13032300 | -0.00570200 |
| H | -2.24939700 | -4.12838600 | -2.62487500 | H         | 1.10016400  | 2.19898300  | -4.36704700 |
| H | -0.39458900 | -2.58942700 | -1.93085900 | H         | -0.84477300 | 4.21032100  | 1.32096300  |
| C | -1.73316500 | 1.71054800  | 1.64755100  | C         | 3.58341700  | 2.03391900  | -0.18562900 |
| C | -0.40404900 | 2.24753000  | 2.08023500  | C         | 2.93278300  | 3.02668300  | -0.79046700 |
| C | -0.11209300 | 3.59626100  | 1.83451700  | H         | 3.65021900  | 1.96836300  | 0.89741100  |
| C | 0.52934000  | 1.45163500  | 2.75901100  | H         | 4.06774700  | 1.24424900  | -0.75416500 |
| C | 1.10947600  | 4.13294200  | 2.23583600  | H         | 2.86525300  | 3.08150300  | -1.87388300 |
| C | 1.74685500  | 1.99402600  | 3.17145900  | H         | 2.44028900  | 3.81624500  | -0.22882100 |
| C | 2.04150200  | 3.33280300  | 2.90489400  |           |             |             |             |
| H | 0.28947800  | 0.41999900  | 2.98290800  |           |             |             |             |
| H | 1.33552000  | 5.17515400  | 2.03124300  | INT1_AQ_S |             |             |             |
| H | 2.46017100  | 1.37315000  | 3.70541600  | C         | -1.37800300 | -1.43129200 | 1.54793200  |
| H | 2.99121300  | 3.75399000  | 3.22093800  | C         | -2.32683700 | -2.01786300 | 2.38671400  |
| O | -2.73404800 | 2.44727100  | 1.68728200  | C         | -1.95262200 | -2.97112100 | 3.35484100  |
| H | -4.27765300 | 0.75105800  | 2.20004900  | C         | -0.64139700 | -3.37024700 | 3.51896800  |
| C | 2.44985300  | -1.28262100 | -0.87798700 | C         | 0.35749200  | -2.80387300 | 2.69224100  |
| C | 3.62424300  | -1.65041800 | -1.53588400 | C         | -0.02582500 | -1.84251800 | 1.71258900  |
| C | 4.50616700  | -2.59971100 | -0.97021700 | N         | 0.89682200  | -1.26750400 | 0.88307400  |
| C | 4.25193800  | -3.20739600 | 0.24018100  | C         | 2.17895400  | -1.59139800 | 0.98871000  |
| C | 3.07007700  | -2.86883700 | 0.94751800  | C         | 2.63484700  | -2.52526900 | 1.93841300  |
| C | 2.18470700  | -1.90223100 | 0.39109300  | C         | 1.73289000  | -3.13211300 | 2.78111000  |
| N | 1.04185900  | -1.53238700 | 1.03701900  | N         | -1.59486300 | -0.39507600 | 0.63633400  |
| C | 0.71791300  | -2.10194700 | 2.19050200  | H         | -2.72752900 | -3.39556200 | 3.98677000  |
| C | 1.53022200  | -3.07282200 | 2.80548100  | H         | -0.36004400 | -4.10474500 | 4.26644000  |
| C | 2.70446900  | -3.44694100 | 2.18841700  | H         | 2.05825200  | -3.86029500 | 3.51804100  |
| N | 1.47274500  | -0.39464100 | -1.28916900 | H         | 3.69434800  | -2.75029500 | 1.98138900  |
| H | 5.40796100  | -2.85442800 | -1.52011900 | H         | 2.87178200  | -1.11257700 | 0.31217900  |
| H | 4.93226600  | -3.94100800 | 0.66103500  | C         | -2.86736400 | -0.26396200 | 0.13151200  |
| H | 3.35774100  | -4.18901000 | 2.63851900  | C         | -3.35297500 | 1.10672600  | -0.22245300 |
| H | 1.22240900  | -3.50635700 | 3.75031300  | C         | -4.18324400 | 1.27542200  | -1.33972500 |
| H | -0.21444800 | -1.78327300 | 2.64666700  | C         | -3.09221000 | 2.20245300  | 0.60977000  |
| C | 1.58941400  | 0.40659800  | -2.37298400 | C         | -4.69343000 | 2.53281800  | -1.65306000 |
| C | 0.40686200  | 1.30991700  | -2.53578300 | C         | -3.62735400 | 3.45664000  | 0.31249500  |
| C | 0.30775500  | 2.18516200  | -3.62397300 | C         | -4.41492900 | 3.62700500  | -0.82761100 |
| C | -0.59533900 | 1.28944700  | -1.56553500 | H         | -2.48295800 | 2.06731700  | 1.49379800  |
| C | -0.79938400 | 3.02724700  | -3.73354700 | H         | -5.31328900 | 2.66066500  | -2.53551200 |
| C | -1.70549700 | 2.12264000  | -1.66744700 | H         | -3.42634300 | 4.29831800  | 0.96863000  |
| C | -1.80385300 | 2.99582300  | -2.76145700 | H         | -4.82002800 | 4.60564400  | -1.06790400 |
|   |             |             |             | O         | -3.67061000 | -1.20736200 | -0.00220200 |



|           |             |             |             |   |             |             |             |
|-----------|-------------|-------------|-------------|---|-------------|-------------|-------------|
| H         | -3.36817300 | -1.73743000 | 2.30022800  | C | -3.92514100 | 1.57417600  | -0.89767900 |
| C         | 2.58885800  | 1.29934800  | -0.70636500 | C | -2.56979400 | 1.31330500  | -0.54868800 |
| C         | 3.83210900  | 1.74788600  | -1.14483500 | N | -1.87774800 | 0.28591400  | -1.11764200 |
| C         | 4.50180500  | 2.78009000  | -0.44832900 | C | -2.45388100 | -0.49110300 | -2.01872200 |
| C         | 3.97336000  | 3.36770100  | 0.68228900  | C | -3.78950300 | -0.29896300 | -2.42847500 |
| C         | 2.71253400  | 2.93444200  | 1.16677000  | C | -4.51882100 | 0.72633300  | -1.86754300 |
| C         | 2.02240800  | 1.91673700  | 0.45495000  | N | -0.56336700 | 1.72902400  | 0.71227300  |
| N         | 0.79703500  | 1.45999000  | 0.85959500  | H | -4.44821100 | 4.22447200  | 1.16628200  |
| C         | 0.25841300  | 1.92408200  | 1.97456400  | H | -5.63526900 | 2.85322600  | -0.53016300 |
| C         | 0.87995200  | 2.92665600  | 2.74711100  | H | -5.55162700 | 0.89805000  | -2.15683800 |
| C         | 2.09060900  | 3.43967600  | 2.33748400  | H | -4.22094200 | -0.96077700 | -3.17103700 |
| N         | 1.80429200  | 0.28417900  | -1.23373700 | H | -1.84771000 | -1.29430500 | -2.42723100 |
| H         | 5.46831900  | 3.10749900  | -0.82056500 | C | 0.33993400  | 2.61796100  | 1.22434900  |
| H         | 4.50628800  | 4.15013500  | 1.21314400  | C | 1.62566300  | 2.02987800  | 1.72318200  |
| H         | 2.58669800  | 4.22011200  | 2.90707900  | C | 2.81868600  | 2.73110900  | 1.49831600  |
| H         | 0.39166400  | 3.27891300  | 3.64878500  | C | 1.65485500  | 0.84233700  | 2.46716700  |
| H         | -0.68690800 | 1.48610500  | 2.27056200  | C | 4.02681300  | 2.23302700  | 1.98013800  |
| C         | 2.17950300  | -0.60265700 | -2.19631900 | C | 2.86292900  | 0.35858300  | 2.97223600  |
| C         | 1.13396400  | -1.64214600 | -2.37678900 | C | 4.05107900  | 1.04715200  | 2.72237700  |
| C         | 1.28346500  | -2.69617100 | -3.28275900 | H | 0.73172000  | 0.31046800  | 2.66798000  |
| C         | -0.01916800 | -1.51361300 | -1.57862000 | H | 4.94974800  | 2.77111200  | 1.78501600  |
| C         | 0.27240900  | -3.64969800 | -3.39498400 | H | 2.87299000  | -0.55097700 | 3.56494500  |
| C         | -1.02122800 | -2.47824400 | -1.69288800 | H | 4.99205400  | 0.66641500  | 3.10825700  |
| C         | -0.87233800 | -3.53800000 | -2.59845400 | O | 0.17285800  | 3.84935100  | 1.29174900  |
| H         | 0.37278600  | -4.47518700 | -4.09373100 | H | -2.10620500 | 3.77275000  | 1.75781200  |
| H         | -1.92274600 | -2.41946300 | -1.09189900 | C | 0.03332400  | -2.72558400 | -0.38955000 |
| H         | -1.66025400 | -4.28283900 | -2.68135900 | C | 0.20923200  | -4.03579600 | -0.82152000 |
| O         | 3.25373000  | -0.58187200 | -2.83185900 | C | -0.45630400 | -5.09703100 | -0.16254400 |
| H         | 4.28295900  | 1.29620600  | -2.01631800 | C | -1.29081400 | -4.88495900 | 0.91398500  |
| Co        | 0.13117400  | -0.01352700 | -0.36263400 | C | -1.49487600 | -3.56236000 | 1.38643200  |
| H         | 2.18633000  | -2.75689200 | -3.88465000 | C | -0.82744900 | -2.49544100 | 0.72882300  |
| H         | -4.40876800 | 0.41689500  | -1.96469700 | N | -0.97145700 | -1.19703000 | 1.13319000  |
| C         | -0.55629500 | 1.92476300  | -1.56357500 | C | -1.75527700 | -0.91010300 | 2.16187000  |
| C         | -0.90383800 | 0.87943000  | -2.34891800 | C | -2.45881200 | -1.90706000 | 2.86673200  |
| H         | -1.24748100 | 2.37001500  | -0.86157400 | C | -2.32889500 | -3.22418600 | 2.48179200  |
| H         | 0.38860900  | 2.43398000  | -1.71374800 | N | 0.59262100  | -1.56131400 | -0.90866600 |
| H         | -0.24809900 | 0.54179900  | -3.14187400 | H | -0.29734900 | -6.10753700 | -0.52750000 |
| H         | -1.89215000 | 0.43950400  | -2.32314700 | H | -1.79603900 | -5.70910800 | 1.40739800  |
|           |             |             |             | H | -2.85835400 | -4.01301500 | 3.00813600  |
| INT1_AQ_T |             |             |             | H | -3.08939400 | -1.62161100 | 3.70111400  |
| C         | -1.88009800 | 2.11515800  | 0.41787500  | H | -1.83240400 | 0.13635600  | 2.43724000  |
| C         | -2.58873400 | 3.15142800  | 1.01678600  | C | 1.55204200  | -1.50549600 | -1.88531100 |
| C         | -3.93536400 | 3.40508000  | 0.67122000  | C | 1.87857500  | -0.09182100 | -2.19877400 |
| C         | -4.60268800 | 2.64692000  | -0.26675900 | C | 2.81279700  | 0.26171700  | -3.17536300 |

|    |             |             |             |   |             |             |             |
|----|-------------|-------------|-------------|---|-------------|-------------|-------------|
| C  | 1.18151800  | 0.88285800  | -1.46588100 | H | 0.31375000  | -5.63636400 | 1.61506100  |
| C  | 3.04774800  | 1.61116200  | -3.43610200 | H | -2.09215400 | -2.46821400 | 3.25672500  |
| C  | 1.40790800  | 2.23075800  | -1.74474300 | H | -1.78097800 | -4.87745500 | 2.71870400  |
| C  | 2.34120300  | 2.58842800  | -2.72765300 | O | 3.25156800  | -1.76728800 | 1.38817300  |
| H  | 3.77122500  | 1.90378800  | -4.19128200 | H | 4.42417300  | 0.06557100  | 1.47355100  |
| H  | 0.87701200  | 3.01428200  | -1.21459300 | C | -2.70679500 | 0.36801600  | -1.13615100 |
| H  | 2.51551200  | 3.64026600  | -2.93895200 | C | -3.74353600 | 0.27676200  | -2.06288900 |
| O  | 2.07341900  | -2.47946900 | -2.45203500 | C | -5.05034500 | 0.70791100  | -1.73799700 |
| H  | 0.85642200  | -4.23904600 | -1.66202900 | C | -5.36110900 | 1.23438400  | -0.50373900 |
| Co | -0.01736400 | 0.08261100  | -0.16201900 | C | -4.34201800 | 1.34651000  | 0.47584900  |
| H  | 3.33677300  | -0.51984300 | -3.71879100 | C | -3.02385200 | 0.90976600  | 0.15775900  |
| H  | 2.78876800  | 3.65857800  | 0.93589800  | N | -2.01310100 | 0.99220300  | 1.07228000  |
| C  | 3.53381500  | -2.29701600 | 0.62905100  | C | -2.24462700 | 1.49373300  | 2.27662300  |
| C  | 4.27070000  | -1.40881500 | -0.03620900 | C | -3.51742300 | 1.94887700  | 2.67222200  |
| H  | 3.31757200  | -2.18416600 | 1.68842800  | C | -4.55944000 | 1.87213700  | 1.77425200  |
| H  | 3.11258800  | -3.16906900 | 0.13549800  | N | -1.37286800 | -0.00180500 | -1.29987400 |
| H  | 4.47952300  | -1.52723100 | -1.09614200 | H | -5.82479300 | 0.61647600  | -2.49446200 |
| H  | 4.68562200  | -0.52860900 | 0.44837700  | H | -6.36736100 | 1.56382400  | -0.26444200 |

INT2\_AQ\_Q

|   |             |             |             |
|---|-------------|-------------|-------------|
| C | 2.57219600  | 0.96210500  | 0.88786900  |
| C | 3.94666600  | 0.96485300  | 1.11690200  |
| C | 4.72727600  | 2.11921400  | 0.87746200  |
| C | 4.17706200  | 3.29036500  | 0.40611800  |
| C | 2.78201200  | 3.34322800  | 0.15974200  |
| C | 1.98999200  | 2.18448700  | 0.40251800  |
| N | 0.64646800  | 2.19079600  | 0.16528500  |
| C | 0.05051000  | 3.28226000  | -0.29145400 |
| C | 0.75777300  | 4.47192500  | -0.54933900 |
| C | 2.11744900  | 4.49710900  | -0.32628600 |
| N | 1.66777200  | -0.08334700 | 1.10206900  |
| H | 5.79482200  | 2.06597900  | 1.07182800  |
| H | 4.78497800  | 4.17006000  | 0.21929800  |
| H | 2.69610600  | 5.39579700  | -0.52033600 |
| H | 0.22747100  | 5.34133300  | -0.92149600 |
| H | -1.01959500 | 3.21512600  | -0.46472200 |
| C | 2.07702000  | -1.34226500 | 1.40554800  |
| C | 0.97772400  | -2.29758600 | 1.77992900  |
| C | 1.15939700  | -3.66161900 | 1.51244500  |
| C | -0.19772800 | -1.87909900 | 2.42233000  |
| C | 0.16945700  | -4.58436700 | 1.84293300  |
| C | -1.18852900 | -2.80452900 | 2.75676800  |
| C | -1.00952600 | -4.15757100 | 2.46195000  |
| H | -0.33059900 | -0.83294500 | 2.68385700  |

|    |             |             |             |
|----|-------------|-------------|-------------|
| H  | 0.31375000  | -5.63636400 | 1.61506100  |
| H  | -2.09215400 | -2.46821400 | 3.25672500  |
| H  | -1.78097800 | -4.87745500 | 2.71870400  |
| O  | 3.25156800  | -1.76728800 | 1.38817300  |
| H  | 4.42417300  | 0.06557100  | 1.47355100  |
| C  | -2.70679500 | 0.36801600  | -1.13615100 |
| C  | -3.74353600 | 0.27676200  | -2.06288900 |
| C  | -5.05034500 | 0.70791100  | -1.73799700 |
| C  | -5.36110900 | 1.23438400  | -0.50373900 |
| C  | -4.34201800 | 1.34651000  | 0.47584900  |
| C  | -3.02385200 | 0.90976600  | 0.15775900  |
| N  | -2.01310100 | 0.99220300  | 1.07228000  |
| C  | -2.24462700 | 1.49373300  | 2.27662300  |
| C  | -3.51742300 | 1.94887700  | 2.67222200  |
| C  | -4.55944000 | 1.87213700  | 1.77425200  |
| N  | -1.37286800 | -0.00180500 | -1.29987400 |
| H  | -5.82479300 | 0.61647600  | -2.49446200 |
| H  | -6.36736100 | 1.56382400  | -0.26444200 |
| H  | -5.55511300 | 2.21106800  | 2.04599300  |
| H  | -3.65673300 | 2.34801000  | 3.67063100  |
| H  | -1.39836200 | 1.53782600  | 2.95627200  |
| C  | -0.90320000 | -0.63319100 | -2.40187800 |
| C  | 0.57028200  | -0.94905000 | -2.31669000 |
| C  | 1.50543500  | 0.08805300  | -2.41876100 |
| C  | 1.00014300  | -2.27601000 | -2.11183200 |
| C  | 2.87035300  | -0.16908900 | -2.27938200 |
| C  | 2.37014500  | -2.51194800 | -1.95840200 |
| C  | 3.30044700  | -1.47187600 | -2.03217200 |
| H  | 3.58532000  | 0.64567000  | -2.34001500 |
| H  | 2.71150700  | -3.52700500 | -1.77360400 |
| H  | 4.35675600  | -1.68192200 | -1.89322000 |
| O  | -1.54148600 | -0.95621200 | -3.42553200 |
| H  | -3.53942800 | -0.13094400 | -3.04133400 |
| Co | -0.17364100 | 0.28167300  | 0.32263600  |
| H  | 1.15601800  | 1.10382800  | -2.57989400 |
| H  | 2.07796400  | -3.98330400 | 1.03381000  |
| C  | -1.13617500 | -3.24189900 | -1.13542500 |
| C  | 0.00737500  | -3.42604000 | -2.07643700 |
| H  | -0.97638000 | -2.84071000 | -0.14335400 |
| H  | -2.12499200 | -3.60908000 | -1.38874600 |
| H  | -0.38462500 | -3.58519400 | -3.08949700 |
| H  | 0.56554300  | -4.34288200 | -1.82351700 |

INT2\_AQ\_S

|   |             |             |             |           |             |             |             |
|---|-------------|-------------|-------------|-----------|-------------|-------------|-------------|
| C | -0.95887000 | -1.82070900 | 1.44781200  | H         | -0.12182400 | 0.76429300  | 2.71279200  |
| C | -1.70279600 | -2.54330600 | 2.37663500  | C         | 1.55190600  | 0.27626500  | -2.64672500 |
| C | -1.20749600 | -3.73897500 | 2.93760200  | C         | 0.24583300  | -0.40269800 | -2.95318900 |
| C | 0.03208000  | -4.24218800 | 2.59605400  | C         | 0.27751800  | -1.72555100 | -3.41539900 |
| C | 0.82827900  | -3.53739300 | 1.66094900  | C         | -0.99011000 | 0.24174000  | -2.70244700 |
| C | 0.32487700  | -2.32792200 | 1.09919500  | C         | -0.90464200 | -2.43971500 | -3.58807400 |
| N | 1.04357200  | -1.59894800 | 0.19777100  | C         | -2.16839100 | -0.49727500 | -2.89336300 |
| C | 2.23917800  | -2.02210000 | -0.18244400 | C         | -2.13097200 | -1.82376800 | -3.31665500 |
| C | 2.81147600  | -3.21105000 | 0.31499600  | H         | -0.87322600 | -3.47024400 | -3.92865100 |
| C | 2.11265500  | -3.96051100 | 1.23499200  | H         | -3.12314100 | -0.01250800 | -2.71480400 |
| N | -1.34837100 | -0.58700500 | 0.90277200  | H         | -3.05764100 | -2.37509200 | -3.44568100 |
| H | -1.82364400 | -4.26752800 | 3.65937500  | O         | 2.48440500  | 0.33427000  | -3.47288100 |
| H | 0.40792300  | -5.16324900 | 3.03017300  | H         | 4.03028300  | 1.71641000  | -2.28806000 |
| H | 2.53137500  | -4.87651100 | 1.64192400  | Co        | 0.12697500  | 0.22653300  | -0.21523300 |
| H | 3.79371100  | -3.51229500 | -0.03172500 | H         | 1.23886100  | -2.18994600 | -3.61396600 |
| H | 2.77234000  | -1.40914800 | -0.90040800 | H         | -4.58824000 | 0.56931700  | -1.00629300 |
| C | -2.67790000 | -0.46355500 | 0.57722000  | C         | -0.67017700 | 1.90992700  | -0.78734000 |
| C | -3.29849300 | 0.89170400  | 0.68211300  | C         | -1.05675700 | 1.70086500  | -2.26326900 |
| C | -4.30383900 | 1.26124500  | -0.22060700 | H         | -1.52852200 | 2.13846500  | -0.16586300 |
| C | -2.95239700 | 1.76238400  | 1.72377600  | H         | 0.07279600  | 2.70307200  | -0.67691800 |
| C | -4.91783400 | 2.50793000  | -0.11520800 | H         | -0.39185300 | 2.28385200  | -2.90934200 |
| C | -3.58638800 | 2.99840400  | 1.84582800  | H         | -2.07634100 | 2.05730700  | -2.44345600 |
| C | -4.55978800 | 3.37880900  | 0.91831400  |           |             |             |             |
| H | -2.18564800 | 1.46689100  | 2.43067800  |           |             |             |             |
| H | -5.67911600 | 2.79933800  | -0.83286600 | INT2_AQ_T |             |             |             |
| H | -3.31930300 | 3.66545200  | 2.66027300  | C         | 2.25880400  | -0.20425300 | -1.16832900 |
| H | -5.04396900 | 4.34722100  | 1.00482400  | C         | 3.63915100  | -0.31816800 | -1.31852400 |
| O | -3.40699500 | -1.41767200 | 0.24177000  | C         | 4.21835500  | -1.47731700 | -1.88379500 |
| H | -2.68199600 | -2.18386000 | 2.67279200  | C         | 3.45814900  | -2.54334000 | -2.30939700 |
| C | 2.59543000  | 1.38469100  | -0.73037500 | C         | 2.04744100  | -2.47337200 | -2.18707200 |
| C | 3.79673800  | 1.86138600  | -1.24256800 | C         | 1.45869700  | -1.30954200 | -1.61485700 |
| C | 4.70747400  | 2.52899500  | -0.39038900 | N         | 0.10750400  | -1.20171000 | -1.45837800 |
| C | 4.45435100  | 2.72267100  | 0.95268500  | C         | -0.68565900 | -2.18621700 | -1.85482500 |
| C | 3.24231700  | 2.24232100  | 1.51323900  | C         | -0.18910900 | -3.36455200 | -2.44306200 |
| C | 2.32612900  | 1.58103400  | 0.65652900  | C         | 1.17249300  | -3.50798000 | -2.60033300 |
| N | 1.13602500  | 1.08364500  | 1.12263100  | N         | 1.52869200  | 0.89177500  | -0.68887100 |
| C | 0.82197900  | 1.19510100  | 2.40619300  | H         | 5.30036800  | -1.51770800 | -1.97235300 |
| C | 1.68329500  | 1.83638100  | 3.31870900  | H         | 3.91287900  | -3.43259700 | -2.73445500 |
| C | 2.87913600  | 2.36110300  | 2.87898200  | H         | 1.59082800  | -4.40882600 | -3.04011600 |
| N | 1.56776100  | 0.71518000  | -1.37431000 | H         | -0.88072500 | -4.13956300 | -2.75378400 |
| H | 5.63733400  | 2.89373200  | -0.81680200 | H         | -1.75064900 | -2.05110900 | -1.69659700 |
| H | 5.16918300  | 3.23040500  | 1.59211200  | C         | 2.14879300  | 2.05125100  | -0.32291600 |
| H | 3.55347700  | 2.86175700  | 3.56722900  | C         | 1.27852200  | 3.27137800  | -0.30749200 |
| H | 1.38384400  | 1.90615300  | 4.35814000  | C         | 1.60543300  | 4.33028300  | 0.55046000  |
|   |             |             |             | C         | 0.15650300  | 3.38182100  | -1.13837500 |

|    |             |             |             |         |             |             |             |
|----|-------------|-------------|-------------|---------|-------------|-------------|-------------|
| C  | 0.79380000  | 5.46155200  | 0.61000300  | H       | -0.47674000 | 0.13647800  | 3.43191700  |
| C  | -0.65086800 | 4.51761900  | -1.08679700 | H       | 0.73117900  | 1.41948300  | 3.50553100  |
| C  | -0.33965400 | 5.55473900  | -0.20390900 |         |             |             |             |
| H  | -0.06848100 | 2.57539700  | -1.82664000 | TS_AQ_S |             |             |             |
| H  | 1.04131800  | 6.27033200  | 1.29126500  | C       | -1.26870800 | -1.58402600 | 1.44406100  |
| H  | -1.51864800 | 4.59504000  | -1.73527400 | C       | -2.18286900 | -2.28103800 | 2.23538500  |
| H  | -0.97201600 | 6.43647600  | -0.15606600 | C       | -1.75939300 | -3.26961900 | 3.14606100  |
| O  | 3.35409000  | 2.17548800  | -0.02643700 | C       | -0.42708300 | -3.59372300 | 3.30271100  |
| H  | 4.27761000  | 0.48405400  | -0.98433800 | C       | 0.54034100  | -2.90761700 | 2.53128100  |
| C  | -2.54419600 | -1.24000900 | 0.93658600  | C       | 0.10906700  | -1.91062300 | 1.60676200  |
| C  | -3.39492400 | -2.13734800 | 1.58102800  | N       | 1.00095100  | -1.21888700 | 0.83921400  |
| C  | -4.78358500 | -2.13186100 | 1.32839900  | C       | 2.29811500  | -1.45711400 | 0.95882700  |
| C  | -5.35719300 | -1.25345100 | 0.43493700  | C       | 2.80743500  | -2.42162900 | 1.85113300  |
| C  | -4.53360500 | -0.32458200 | -0.24863800 | C       | 1.93419000  | -3.14643000 | 2.62828900  |
| C  | -3.13118600 | -0.31462200 | 0.00697100  | N       | -1.56907000 | -0.51446700 | 0.58976600  |
| N  | -2.29664300 | 0.55725800  | -0.63806700 | H       | -2.51229700 | -3.78155800 | 3.73870300  |
| C  | -2.79473600 | 1.40439800  | -1.52780200 | H       | -0.10624500 | -4.35587100 | 4.00556400  |
| C  | -4.16789100 | 1.46325700  | -1.83550800 | H       | 2.29546900  | -3.89932700 | 3.32278400  |
| C  | -5.03233800 | 0.60524200  | -1.19476800 | H       | 3.87925900  | -2.57571900 | 1.90554200  |
| N  | -1.17608300 | -1.10653100 | 1.11963100  | H       | 2.96748200  | -0.87846700 | 0.33557700  |
| H  | -5.40672500 | -2.84822400 | 1.85624800  | C       | -2.83342900 | -0.49355200 | 0.05462400  |
| H  | -6.42468400 | -1.26016500 | 0.23873400  | C       | -3.44627400 | 0.83073400  | -0.27832800 |
| H  | -6.09755900 | 0.62362500  | -1.40632500 | C       | -4.25272000 | 0.93851400  | -1.42003600 |
| H  | -4.51824800 | 2.18028400  | -2.56933500 | C       | -3.30792600 | 1.93568000  | 0.57114200  |
| H  | -2.09235500 | 2.06180500  | -2.02530400 | C       | -4.86292200 | 2.14950100  | -1.73842800 |
| C  | -0.40285400 | -2.02253900 | 1.74824300  | C       | -3.94067100 | 3.14107600  | 0.26656800  |
| C  | 1.02463100  | -1.59830500 | 1.95268600  | C       | -4.70644400 | 3.25453500  | -0.89590600 |
| C  | 2.03405300  | -2.51589400 | 1.63492200  | H       | -2.71361200 | 1.84698200  | 1.47096700  |
| C  | 1.35865900  | -0.31560400 | 2.43577100  | H       | -5.46492700 | 2.23217200  | -2.63853100 |
| C  | 3.37587300  | -2.16098700 | 1.74846700  | H       | -3.83461600 | 3.99027600  | 0.93524800  |
| C  | 2.71154900  | 0.02218600  | 2.55121100  | H       | -5.18806900 | 4.19685100  | -1.14033500 |
| C  | 3.71376300  | -0.88317600 | 2.20014500  | O       | -3.53179600 | -1.50859400 | -0.14711700 |
| H  | 4.15185600  | -2.86904400 | 1.47424300  | H       | -3.23954300 | -2.06276100 | 2.15417400  |
| H  | 2.97847200  | 1.00867400  | 2.92015800  | C       | 2.43048700  | 1.66985200  | -0.62761700 |
| H  | 4.75677200  | -0.59209500 | 2.28378000  | C       | 3.61129500  | 2.28893000  | -1.02501300 |
| O  | -0.76188800 | -3.16350200 | 2.11081300  | C       | 4.11485000  | 3.38762700  | -0.29037200 |
| H  | -2.97833900 | -2.84878600 | 2.27866200  | C       | 3.48203700  | 3.87097100  | 0.83637600  |
| Co | -0.30348500 | 0.31508600  | -0.04191800 | C       | 2.28166100  | 3.25845200  | 1.28041000  |
| H  | 1.75127600  | -3.50219300 | 1.28000700  | C       | 1.75823200  | 2.17451000  | 0.52789100  |
| H  | 2.48503400  | 4.24414700  | 1.18004500  | N       | 0.60381500  | 1.53334600  | 0.89327800  |
| C  | -0.40596300 | 1.38572900  | 1.68884700  | C       | -0.01732700 | 1.88281900  | 2.00871800  |
| C  | 0.27810500  | 0.66840600  | 2.84601400  | C       | 0.44206800  | 2.94177900  | 2.81818700  |
| H  | 0.08300600  | 2.30962200  | 1.39372600  | C       | 1.57239700  | 3.63682900  | 2.44905000  |
| H  | -1.47732700 | 1.52769200  | 1.83309600  | N       | 1.79214300  | 0.57376500  | -1.18754700 |

|         |             |             |             |    |             |             |             |
|---------|-------------|-------------|-------------|----|-------------|-------------|-------------|
| H       | 5.03616700  | 3.85313000  | -0.62830900 | C  | 2.96784700  | 0.12727000  | 0.23991300  |
| H       | 3.89103000  | 4.70478200  | 1.39794900  | C  | 3.40116800  | -1.25277700 | -0.14698600 |
| H       | 1.94026900  | 4.46348200  | 3.04969600  | C  | 4.23069300  | -1.42530100 | -1.26339700 |
| H       | -0.10796600 | 3.19296800  | 3.71806900  | C  | 3.05572400  | -2.36523400 | 0.63187700  |
| H       | -0.89451100 | 1.30522500  | 2.26985400  | C  | 4.66580900  | -2.69819300 | -1.62582400 |
| C       | 2.31144900  | -0.26935800 | -2.11342600 | C  | 3.51409000  | -3.63667700 | 0.28482000  |
| C       | 1.40520700  | -1.43180900 | -2.31439300 | C  | 4.30771600  | -3.80666400 | -0.85193900 |
| C       | 1.86867700  | -2.62400000 | -2.87107200 | H  | 2.43385400  | -2.22804000 | 1.50872200  |
| C       | 0.08967000  | -1.32958400 | -1.80890800 | H  | 5.28776400  | -2.82779600 | -2.50664800 |
| C       | 1.03037700  | -3.73892000 | -2.91217400 | H  | 3.24942600  | -4.49296700 | 0.89823300  |
| C       | -0.74106800 | -2.45475500 | -1.85476600 | H  | 4.65349200  | -4.79792500 | -1.13038000 |
| C       | -0.26653500 | -3.65335800 | -2.39350500 | O  | 3.77480600  | 1.06531000  | 0.06280400  |
| H       | 1.38595400  | -4.67248300 | -3.33785900 | H  | 3.45152800  | 1.36149600  | 2.55680800  |
| H       | -1.75624600 | -2.40099000 | -1.47470800 | C  | -2.81352700 | -1.15376000 | -0.65881900 |
| H       | -0.91603800 | -4.52422500 | -2.41458600 | C  | -4.11241400 | -1.48356000 | -1.04229800 |
| O       | 3.41629700  | -0.15382000 | -2.68472900 | C  | -4.88563000 | -2.38177800 | -0.27319600 |
| H       | 4.14277000  | 1.92234100  | -1.89135100 | C  | -4.40075000 | -2.95972000 | 0.88092200  |
| Co      | 0.12762000  | 0.11783800  | -0.36840100 | C  | -3.08554300 | -2.65236000 | 1.31520000  |
| H       | 2.88784800  | -2.67215500 | -3.24355800 | C  | -2.29395300 | -1.76020600 | 0.53860400  |
| H       | -4.38023500 | 0.07099700  | -2.05974400 | N  | -1.01759000 | -1.43886300 | 0.91469100  |
| C       | -0.69443200 | 1.46824400  | -1.59793500 | C  | -0.50718900 | -1.93342400 | 2.03185600  |
| C       | -0.87129700 | 0.30046200  | -2.38864700 | C  | -1.23005700 | -2.81228100 | 2.86224000  |
| H       | -1.54267300 | 1.89281900  | -1.08263600 | C  | -2.50763800 | -3.17670200 | 2.49924100  |
| H       | 0.06019500  | 2.18279600  | -1.90867000 | N  | -1.93324400 | -0.28497800 | -1.26966500 |
| H       | -0.34270600 | 0.24630600  | -3.33369200 | H  | -5.89317100 | -2.61319100 | -0.60713100 |
| H       | -1.85411300 | -0.15634000 | -2.41322600 | H  | -5.00700000 | -3.64147100 | 1.46905200  |
|         |             |             |             | H  | -3.08769900 | -3.85979000 | 3.11309100  |
|         |             |             |             | H  | -0.76761800 | -3.18951000 | 3.76737800  |
| TS_AQ_T |             |             |             | H  | 0.50060300  | -1.61913400 | 2.27899200  |
| C       | 1.50678400  | 1.31847700  | 1.65468700  | C  | -2.20321800 | 0.53175600  | -2.30752300 |
| C       | 2.45519500  | 1.78732300  | 2.56226700  | C  | -1.04518700 | 1.44699500  | -2.55889500 |
| C       | 2.14958900  | 2.80360400  | 3.49003300  | C  | -1.21522000 | 2.64435400  | -3.25802400 |
| C       | 0.89744500  | 3.38008000  | 3.54404400  | C  | 0.20889800  | 1.14894500  | -1.99073800 |
| C       | -0.10428100 | 2.93605200  | 2.64750700  | C  | -0.15982400 | 3.55190100  | -3.36449400 |
| C       | 0.20556800  | 1.90679700  | 1.70807200  | C  | 1.26784100  | 2.04871500  | -2.09968700 |
| N       | -0.72893000 | 1.45127500  | 0.82380100  | C  | 1.07236800  | 3.26017100  | -2.77357900 |
| C       | -1.94925700 | 1.96517900  | 0.82728400  | H  | -0.29925000 | 4.48672300  | -3.89907500 |
| C       | -2.33768700 | 2.98165100  | 1.72206500  | H  | 2.23723700  | 1.82136200  | -1.66907100 |
| C       | -1.41943900 | 3.46368000  | 2.62652700  | H  | 1.89385900  | 3.96741800  | -2.84675300 |
| N       | 1.71326500  | 0.25690400  | 0.76688300  | O  | -3.26706800 | 0.61761800  | -2.96229100 |
| H       | 2.92541400  | 3.13067100  | 4.17642800  | H  | -4.52597900 | -1.03809300 | -1.93610100 |
| H       | 0.66348100  | 4.16375700  | 4.25758500  | Co | -0.07267700 | -0.11757600 | -0.35289100 |
| H       | -1.68579200 | 4.24729700  | 3.32998600  | H  | -2.18794300 | 2.86136400  | -3.68992700 |
| H       | -3.35133700 | 3.36431100  | 1.68187300  | H  | 4.51597500  | -0.55547500 | -1.84676100 |
| H       | -2.64956600 | 1.56384300  | 0.10548500  |    |             |             |             |

C 0.50244400 -1.77652200 -1.51803900  
 C 0.89555400 -0.78294000 -2.42674700  
 H 1.22756500 -2.23541600 -0.85902700  
 H -0.41122600 -2.33142400 -1.69612600  
 H 0.34986000 -0.69249100 -3.35837500  
 H 1.93887800 -0.49385400 -2.46614100

INT1\_H\_Q(m06)

C 4.35444300 -2.74498100 -0.62741600  
 C 3.55794100 -3.58068100 -1.41374200  
 C 2.24824600 -3.21762700 -1.69995500  
 C 1.74824600 -2.01376800 -1.19604900  
 C 2.53305700 -1.17112000 -0.40422000  
 C 3.84466500 -1.54702200 -0.12153500  
 H 5.38180900 -3.03220600 -0.40683900  
 H 3.96478900 -4.51206400 -1.80189000  
 H 1.60910700 -3.85080200 -2.31414500  
 H 4.48334900 -0.91041600 0.49509200  
 C 0.36436000 -1.58135000 -1.49598500  
 O -0.42021300 -2.27567100 -2.14601600  
 N 0.08211000 -0.32850100 -0.97314100  
 C -1.10878300 0.33718300 -1.19627700  
 C -1.14707600 1.65239400 -0.63137600  
 C -2.23604500 -0.10012800 -1.88639800  
 C -2.28504700 2.48195900 -0.76791600  
 C -3.36678800 0.72993500 -2.01589000  
 H -2.24263500 -1.08860800 -2.32734000  
 C -0.01160500 3.27008700 0.57416500  
 C -2.22703000 3.76461300 -0.18161400  
 C -3.40800200 1.99345500 -1.47673600  
 H -4.22659000 0.34833100 -2.56201500  
 C -1.09289000 4.16126300 0.48617000  
 H 0.90141000 3.54930600 1.10006500  
 H -3.08737700 4.42586200 -0.26875400  
 H -4.28497600 2.62849500 -1.58375000  
 H -1.01768100 5.14176500 0.94635600  
 N -0.03932100 2.06245300 0.03471700  
 Co 1.52743100 0.54826500 0.09796700  
 C 0.35957800 0.21894900 2.31920400  
 C 1.24391900 -0.78196400 2.16691100  
 C 3.22353100 2.30082000 -0.31731200  
 O 2.83375200 1.92477500 0.84546500  
 O 2.71513800 1.75356500 -1.33139500

C 4.24172400 3.38196900 -0.42768200  
 H 5.09914600 3.15052600 0.21215100  
 H 4.56711400 3.51621000 -1.46113900  
 H 3.80241600 4.31630700 -0.05887500  
 H 0.64758800 1.16978300 2.76653700  
 H 0.94280900 -1.75397700 1.78144500  
 H 2.27515000 -0.68616100 2.50700900  
 H -0.68571800 0.10232600 2.03680600

INT1\_H\_Q(pbe0)

C 4.36715300 -2.60892800 -1.03501600  
 C 3.48231500 -3.56358800 -1.55085600  
 C 2.12419500 -3.28543900 -1.58675400  
 C 1.66682200 -2.05092500 -1.10404100  
 C 2.52882100 -1.06644200 -0.57253200  
 C 3.89439700 -1.38442200 -0.56216300  
 H 5.43250900 -2.82881500 -1.00557500  
 H 3.85925600 -4.51172200 -1.92449300  
 H 1.41533700 -4.00412500 -1.99130900  
 H 4.61332500 -0.66691200 -0.16600900  
 C 0.22468200 -1.74868600 -1.15208500  
 O -0.64939100 -2.56463500 -1.43738600  
 N -0.03147100 -0.41366400 -0.80613900  
 C -1.14530200 0.25345400 -1.11386500  
 C -1.16083900 1.62685200 -0.64487300  
 C -2.26206900 -0.20994700 -1.85151000  
 C -2.28272900 2.45227600 -0.87380300  
 C -3.35635400 0.62391800 -2.07426600  
 H -2.25854300 -1.22491900 -2.22624300  
 C -0.03355600 3.31411900 0.44786400  
 C -2.23379200 3.77244200 -0.38009400  
 C -3.38760200 1.92488900 -1.59528000  
 H -4.20319800 0.24083900 -2.63510300  
 C -1.10633500 4.20163200 0.28624400  
 H 0.87377300 3.62106100 0.96100300  
 H -3.08165500 4.43372100 -0.53466700  
 H -4.24963200 2.56088500 -1.77417100  
 H -1.03100000 5.20955000 0.67918500  
 N -0.06032600 2.06802400 -0.00591000  
 Co 1.54279000 0.59061200 0.16109800  
 C 0.31414900 0.21639800 2.35782900  
 C 1.21058100 -0.77519100 2.24010500  
 C 3.31474200 2.40594800 -0.11816700  
 O 2.94829000 1.86404800 0.98473400

|   |             |             |             |   |             |             |             |
|---|-------------|-------------|-------------|---|-------------|-------------|-------------|
| O | 2.75985700  | 2.09606500  | -1.19978600 | C | 0.75422000  | 3.08851000  | -0.86076400 |
| C | 4.43537000  | 3.40477700  | -0.07360800 | O | 0.93882900  | 2.80237000  | 0.36286500  |
| H | 5.36050800  | 2.88912400  | 0.20548100  | O | 0.40874000  | 2.18439500  | -1.67796100 |
| H | 4.57125200  | 3.89011500  | -1.04100800 | C | 0.96242000  | 4.50477800  | -1.32537900 |
| H | 4.23458500  | 4.15435600  | 0.69734300  | H | 2.01712100  | 4.76762500  | -1.19845600 |
| H | 0.57928200  | 1.17150700  | 2.80609700  | H | 0.68196000  | 4.62619100  | -2.37214000 |
| H | 0.93308200  | -1.74566500 | 1.83745500  | H | 0.37553600  | 5.18381400  | -0.70073200 |
| H | 2.23108800  | -0.66590400 | 2.60045800  | H | -0.85594200 | 1.59645400  | 3.09053300  |
| H | -0.71928200 | 0.08686800  | 2.04647500  | H | 1.30668900  | -0.60902600 | 3.07056100  |
|   |             |             |             | H | 1.58748700  | 1.21909100  | 3.10253700  |
|   |             |             |             | H | -1.13834600 | -0.23331400 | 3.05636300  |

INT1\_H\_Q(wb97xd)

|    |             |             |             |
|----|-------------|-------------|-------------|
| C  | 4.80286200  | -0.48427900 | 0.15727500  |
| C  | 4.68413400  | -1.86237700 | -0.05725600 |
| C  | 3.42925800  | -2.41435500 | -0.25964200 |
| C  | 2.29745600  | -1.58259200 | -0.24356300 |
| C  | 2.37721700  | -0.18533700 | -0.03290400 |
| C  | 3.67075300  | 0.32738400  | 0.16516500  |
| H  | 5.78669300  | -0.04938700 | 0.31733300  |
| H  | 5.56816000  | -2.49335100 | -0.06415800 |
| H  | 3.31434800  | -3.48168400 | -0.42701300 |
| H  | 3.80038200  | 1.39593700  | 0.33378400  |
| C  | 0.96905700  | -2.21955500 | -0.44718400 |
| O  | 0.81812800  | -3.41037000 | -0.69881600 |
| N  | -0.09232700 | -1.30178900 | -0.32042000 |
| C  | -1.38634300 | -1.59219800 | -0.31328600 |
| C  | -2.25962200 | -0.43107400 | -0.13132000 |
| C  | -1.99960400 | -2.87011500 | -0.44867100 |
| C  | -3.65723600 | -0.59119600 | -0.09781800 |
| C  | -3.38386000 | -2.99768200 | -0.42163800 |
| H  | -1.37026600 | -3.73861900 | -0.57982500 |
| C  | -2.43176300 | 1.84448700  | 0.19458200  |
| C  | -4.44824600 | 0.56160200  | 0.09453800  |
| C  | -4.20969700 | -1.89554200 | -0.25366900 |
| H  | -3.82460800 | -3.98204100 | -0.53605700 |
| C  | -3.83158500 | 1.78305800  | 0.24321500  |
| H  | -1.91321500 | 2.79098700  | 0.31526100  |
| H  | -5.52941100 | 0.46910400  | 0.12660600  |
| H  | -5.28855700 | -2.01379100 | -0.23447400 |
| H  | -4.40156600 | 2.69155700  | 0.39733900  |
| N  | -1.66985800 | 0.77423400  | 0.01060300  |
| Co | 0.52458200  | 0.70823100  | -0.07958100 |
| C  | -0.43350600 | 0.59466600  | 3.07604800  |
| C  | 0.88234200  | 0.39180600  | 3.08414800  |

INT1\_H\_S(m06)

|    |             |             |             |
|----|-------------|-------------|-------------|
| C  | 4.43062700  | -2.31802500 | -0.46822000 |
| C  | 3.77844600  | -3.18755500 | -1.34331900 |
| C  | 2.44535600  | -2.96574700 | -1.66780900 |
| C  | 1.77651600  | -1.87689700 | -1.10960000 |
| C  | 2.42563200  | -1.00599400 | -0.22712300 |
| C  | 3.76033500  | -1.22925800 | 0.09416300  |
| H  | 5.47595400  | -2.49009700 | -0.21619200 |
| H  | 4.31326400  | -4.03326300 | -1.76993100 |
| H  | 1.91217600  | -3.62114200 | -2.35568000 |
| H  | 4.28826300  | -0.56758900 | 0.78147900  |
| C  | 0.37333100  | -1.54984800 | -1.44487100 |
| O  | -0.32592400 | -2.22526000 | -2.21347700 |
| N  | -0.00618100 | -0.40179700 | -0.81830800 |
| C  | -1.16820400 | 0.30921000  | -1.07984700 |
| C  | -1.15798500 | 1.63506100  | -0.55563800 |
| C  | -2.29257400 | -0.10459300 | -1.77971800 |
| C  | -2.24461100 | 2.51963500  | -0.75201800 |
| C  | -3.37614800 | 0.77840400  | -1.96770500 |
| H  | -2.33225800 | -1.10807400 | -2.18624400 |
| C  | 0.03633100  | 3.22710500  | 0.64333000  |
| C  | -2.12644600 | 3.81790800  | -0.20467800 |
| C  | -3.36938700 | 2.06255000  | -1.47697200 |
| H  | -4.24051200 | 0.42040500  | -2.52328200 |
| C  | -0.99255100 | 4.17257800  | 0.48377100  |
| H  | 0.94272800  | 3.47132600  | 1.19646600  |
| H  | -2.94354300 | 4.52467800  | -0.33867800 |
| H  | -4.20959900 | 2.73557200  | -1.63379400 |
| H  | -0.87552000 | 5.16293700  | 0.91299000  |
| N  | -0.04600000 | 2.00911500  | 0.14199700  |
| Co | 1.29890000  | 0.51098800  | 0.20144300  |
| C  | 0.31525100  | 0.20582200  | 2.04238200  |

C 1.20570200 -0.82246300 1.89609400  
C 3.03288000 1.96577500 -0.30778600  
O 2.75759400 1.61867600 0.88834400  
O 2.29395200 1.46861000 -1.21740100  
C 4.17424000 2.85716700 -0.61755100  
H 5.09076000 2.25393000 -0.60984700  
H 4.05918700 3.30675100 -1.60632300  
H 4.27204900 3.62982400 0.14986700  
H 0.58684100 1.10487300 2.59400000  
H 0.87092600 -1.80523000 1.57390300  
H 2.19665500 -0.76770400 2.34207500  
H -0.74137500 0.06518300 1.82436700

INT1\_H\_S(pbe0)

C 4.42734800 -2.31836900 -0.43944200  
C 3.77710100 -3.20097800 -1.30481000  
C 2.44574700 -2.98029200 -1.64210200  
C 1.77943600 -1.87818600 -1.10637600  
C 2.42287000 -0.99220500 -0.23162000  
C 3.75613800 -1.21807600 0.10048100  
H 5.46911500 -2.48971200 -0.17854200  
H 4.31073300 -4.05466700 -1.71316100  
H 1.91611600 -3.64553000 -2.32006000  
H 4.27992500 -0.54817900 0.77838900  
C 0.37690300 -1.54845800 -1.44840200  
O -0.33297900 -2.23749700 -2.19767300  
N 0.01357600 -0.38482400 -0.84973300  
C -1.15184000 0.31547400 -1.09663100  
C -1.14380000 1.63570400 -0.55658200  
C -2.27835700 -0.09482200 -1.79746900  
C -2.23421100 2.52099700 -0.73561400  
C -3.36591000 0.78784600 -1.96730300  
H -2.31337500 -1.09111600 -2.21697000  
C 0.06076600 3.21295900 0.64973500  
C -2.11240000 3.81379700 -0.17356800  
C -3.36194700 2.06732800 -1.46020200  
H -4.23088200 0.43507600 -2.52251800  
C -0.97043300 4.15887200 0.50907300  
H 0.97072400 3.44719000 1.19448800  
H -2.92749000 4.52292900 -0.29033800  
H -4.20524200 2.73561400 -1.60596900  
H -0.84901500 5.14302700 0.94818500  
N -0.02830900 2.00102500 0.13533500  
Co 1.30658300 0.51821800 0.17369200

C 0.28951200 0.18741800 2.01998300  
C 1.17667800 -0.84066700 1.87833800  
C 3.03089700 1.97450300 -0.32410500  
O 2.75821600 1.62186600 0.87085100  
O 2.29220300 1.46777700 -1.22991600  
C 4.15689400 2.88645400 -0.64051500  
H 5.07982000 2.29556600 -0.66374400  
H 4.01201300 3.35037100 -1.61726000  
H 4.25666800 3.64553000 0.13820500  
H 0.55620200 1.07933600 2.58009600  
H 0.84717600 -1.81222600 1.52595300  
H 2.16028100 -0.79268300 2.33525000  
H -0.75836600 0.05716100 1.76723100

INT1\_H\_S(wb97xd)

C 4.43002700 -2.35697900 -0.43627700  
C 3.77076400 -3.23816300 -1.29551400  
C 2.44517400 -2.99911300 -1.64392100  
C 1.79483200 -1.88045300 -1.12512900  
C 2.44471800 -0.99518000 -0.25710000  
C 3.77268700 -1.23982200 0.08441100  
H 5.46638600 -2.54263000 -0.16664400  
H 4.29179100 -4.10487400 -1.69090700  
H 1.91190500 -3.66605300 -2.31628500  
H 4.30266800 -0.56908300 0.75597800  
C 0.39019800 -1.53620800 -1.47506000  
O -0.31643600 -2.22553900 -2.22612800  
N 0.02981400 -0.37221500 -0.87721500  
C -1.14581100 0.32779600 -1.11876300  
C -1.14815300 1.64475500 -0.56388900  
C -2.26697000 -0.08373300 -1.81897400  
C -2.24351200 2.51882500 -0.73369900  
C -3.36585000 0.79211100 -1.98093300  
H -2.29910700 -1.07509200 -2.24803300  
C 0.03793100 3.22213600 0.66091300  
C -2.13745300 3.80952100 -0.15851400  
C -3.37087700 2.06326900 -1.46324400  
H -4.22733400 0.43622400 -2.53816800  
C -1.00302100 4.16069600 0.52875200  
H 0.94363100 3.46243100 1.20933200  
H -2.95986400 4.51004800 -0.27028200  
H -4.21905000 2.72631600 -1.60093200  
H -0.89251600 5.14074700 0.97766900



N -0.03486300 2.01488200 0.13669900  
 Co 1.33272400 0.52572000 0.15642900  
 C 0.28289100 0.18109700 2.07632000  
 C 1.15800300 -0.84639500 1.94287400  
 C 3.05181400 1.99392000 -0.34051300  
 O 2.79553800 1.63473200 0.85461200  
 O 2.30456800 1.48768900 -1.23958400  
 C 4.17319800 2.91460500 -0.66828000  
 H 5.09808000 2.32844600 -0.69403000  
 H 4.01830200 3.37445900 -1.64484600  
 H 4.27038600 3.67663300 0.10717300  
 H 0.55797700 1.08149900 2.61733700  
 H 0.83200500 -1.81117100 1.57085100  
 H 2.14995400 -0.79514200 2.37981000  
 H -0.76206500 0.06283700 1.80836300

H -0.95377200 5.11739200 0.93094400  
 N -0.04033600 2.03345500 -0.01285400  
 Co 1.36612800 0.57230500 -0.08855200  
 C 0.27294700 0.18036000 2.27595900  
 C 1.13330000 -0.83769200 2.14677100  
 C 3.24012500 2.14519000 -0.42176900  
 O 2.86280300 1.62272900 0.68650100  
 O 2.62087200 1.85174800 -1.47466400  
 C 4.41909300 3.05857500 -0.41847700  
 H 5.32118800 2.46368800 -0.23176900  
 H 4.52076600 3.57233300 -1.37652200  
 H 4.33145100 3.78549200 0.39470500  
 H 0.57754400 1.13006100 2.71498300  
 H 0.82125100 -1.80245800 1.75007400  
 H 2.16700200 -0.75554800 2.48053200  
 H -0.77276500 0.08633400 1.98580100

INT1\_H\_T(m06)

C 4.38338900 -2.40372600 -0.54282400  
 C 3.67646000 -3.35431800 -1.27923500  
 C 2.34977100 -3.11920300 -1.62256100  
 C 1.74589600 -1.92979400 -1.22100900  
 C 2.45344900 -0.98049200 -0.47830300  
 C 3.77844600 -1.21000100 -0.13621300  
 H 5.42244200 -2.59155900 -0.27710900  
 H 4.16499900 -4.27688700 -1.58438800  
 H 1.77354600 -3.84199800 -2.19929500  
 H 4.34663200 -0.48221900 0.44226100  
 C 0.34448100 -1.58917800 -1.54684200  
 O -0.41876600 -2.31801600 -2.18150300  
 N 0.03696300 -0.34657500 -1.04193900  
 C -1.17365000 0.32570000 -1.21496400  
 C -1.18124700 1.63305000 -0.64739900  
 C -2.31801000 -0.11358800 -1.85857500  
 C -2.31408900 2.47321500 -0.74039000  
 C -3.44996800 0.72642700 -1.94556600  
 H -2.34203300 -1.10278200 -2.29990800  
 C 0.02238400 3.23714300 0.52614900  
 C -2.21623700 3.75510400 -0.15354200  
 C -3.46461900 1.99015000 -1.40800900  
 H -4.33155000 0.34964900 -2.45957900  
 C -1.05508300 4.13806600 0.47348800  
 H 0.95512700 3.50329900 1.02313400  
 H -3.06997300 4.42834100 -0.20823000  
 H -4.34127400 2.62977800 -1.48465300

INT1\_H\_T(pbe0)

C 4.39068900 -2.39227000 -0.56559800  
 C 3.67664900 -3.36456800 -1.26953100  
 C 2.35160400 -3.13485800 -1.62627600  
 C 1.75605900 -1.92523300 -1.27218900  
 C 2.47148200 -0.95208200 -0.56990100  
 C 3.79419500 -1.17812600 -0.21106100  
 H 5.42483300 -2.57969000 -0.28702100  
 H 4.15783600 -4.30140100 -1.53568600  
 H 1.77288600 -3.87723200 -2.17087500  
 H 4.36253000 -0.43562800 0.34266500  
 C 0.35009700 -1.58649100 -1.58486500  
 O -0.43098500 -2.33401900 -2.18111700  
 N 0.06346200 -0.33815400 -1.10541600  
 C -1.16042200 0.31018400 -1.21304700  
 C -1.16106200 1.63160800 -0.67596000  
 C -2.33840900 -0.16868200 -1.76571500  
 C -2.32029300 2.44279200 -0.70328300  
 C -3.49329000 0.64383200 -1.79171200  
 H -2.36674700 -1.16735600 -2.18013700  
 C 0.07958600 3.28434100 0.39126500  
 C -2.21462300 3.73589300 -0.14117100  
 C -3.50311400 1.91965300 -1.27962500  
 H -4.39756400 0.23536900 -2.23420800  
 C -1.02194100 4.15558100 0.40134000  
 H 1.03471700 3.57483000 0.81920900  
 H -3.08407600 4.38786700 -0.14385500

|    |             |             |             |    |             |             |             |
|----|-------------|-------------|-------------|----|-------------|-------------|-------------|
| H  | -4.39841000 | 2.53343600  | -1.30665900 | H  | -1.58159300 | 2.94248600  | 0.33159500  |
| H  | -0.91544300 | 5.14190100  | 0.83917400  | H  | -5.43055500 | 1.04318000  | 0.01331000  |
| N  | 0.00834300  | 2.07146000  | -0.12773000 | H  | -5.46080300 | -1.48068600 | -0.35710700 |
| Co | 1.42014200  | 0.63258800  | -0.21498600 | H  | -4.07714600 | 3.11512500  | 0.33329800  |
| C  | 0.15742200  | 0.21886700  | 2.20464300  | N  | -1.56987400 | 0.91569900  | 0.02221000  |
| C  | 0.97344300  | -0.83180200 | 2.06225900  | Co | 0.42752200  | 0.53471500  | -0.01424400 |
| C  | 3.34366400  | 2.16113300  | -0.38907500 | C  | -0.38034000 | 0.41452000  | 3.02980900  |
| O  | 2.82913300  | 1.68549900  | 0.68736900  | C  | 0.91646900  | 0.11466200  | 3.09553400  |
| O  | 2.85677400  | 1.81681700  | -1.49405500 | C  | 1.16647300  | 2.71784700  | -0.86377800 |
| C  | 4.51304900  | 3.08489400  | -0.28445700 | O  | 0.99729500  | 2.40151100  | 0.36777000  |
| H  | 5.40080100  | 2.49495000  | -0.03087200 | O  | 0.96006100  | 1.83969900  | -1.73985800 |
| H  | 4.68586000  | 3.59925000  | -1.23040900 | C  | 1.62360400  | 4.10137900  | -1.20742300 |
| H  | 4.35324400  | 3.80740500  | 0.51959600  | H  | 2.68442300  | 4.18891700  | -0.95069500 |
| H  | 0.49017300  | 1.13685900  | 2.68314600  | H  | 1.49601500  | 4.29773200  | -2.27211100 |
| H  | 0.63271200  | -1.75968600 | 1.61046400  | H  | 1.07365000  | 4.83621100  | -0.61531700 |
| H  | 1.99745000  | -0.80964800 | 2.42743000  | H  | -0.73064600 | 1.44332300  | 3.06127000  |
| H  | -0.87737400 | 0.18346600  | 1.87259000  | H  | 1.26627100  | -0.91415300 | 3.06226700  |
|    |             |             |             | H  | 1.67620200  | 0.88797900  | 3.17964100  |
|    |             |             |             | H  | -1.13999300 | -0.35948400 | 2.94905300  |

INT1\_H\_T(wb97xd)

|   |             |             |             |
|---|-------------|-------------|-------------|
| C | 4.59324300  | -0.40029000 | 0.09464500  |
| C | 4.54399300  | -1.78053800 | -0.10696200 |
| C | 3.31840500  | -2.41970400 | -0.27264200 |
| C | 2.15068400  | -1.66160200 | -0.23685100 |
| C | 2.20336900  | -0.28139300 | -0.04142300 |
| C | 3.42136900  | 0.36211600  | 0.12904000  |
| H | 5.55316800  | 0.09072000  | 0.22772400  |
| H | 5.46401600  | -2.35627000 | -0.13090600 |
| H | 3.25753000  | -3.49406900 | -0.42440600 |
| H | 3.47517400  | 1.43414300  | 0.29385900  |
| C | 0.79033700  | -2.24632500 | -0.37304800 |
| O | 0.57197200  | -3.44863500 | -0.53892800 |
| N | -0.14852000 | -1.25735300 | -0.27650700 |
| C | -1.53357100 | -1.44237200 | -0.31721400 |
| C | -2.28376600 | -0.23736500 | -0.15191900 |
| C | -2.23132400 | -2.62252700 | -0.49214600 |
| C | -3.69484100 | -0.23855100 | -0.16291400 |
| C | -3.64707100 | -2.62044100 | -0.50510300 |
| H | -1.69414400 | -3.55141400 | -0.62098800 |
| C | -2.20180200 | 2.06268300  | 0.19022100  |
| C | -4.34502000 | 1.00672000  | 0.01609900  |
| C | -4.37555200 | -1.46955300 | -0.34621900 |
| H | -4.15952600 | -3.56712300 | -0.64620000 |
| C | -3.60482400 | 2.15024200  | 0.19204600  |

INT2\_H\_Q(m06)

|   |             |             |             |
|---|-------------|-------------|-------------|
| C | 5.09779300  | -1.66270400 | 0.01673400  |
| C | 5.07053800  | -1.13515500 | -1.27167300 |
| C | 3.84838900  | -0.87441800 | -1.87717200 |
| C | 2.64727900  | -1.09863800 | -1.19839400 |
| C | 2.66799000  | -1.66180900 | 0.08905800  |
| C | 3.90480000  | -1.93444300 | 0.67772500  |
| H | 6.04795500  | -1.87628600 | 0.50192000  |
| H | 5.99754900  | -0.93216100 | -1.80327500 |
| H | 3.80945800  | -0.46916500 | -2.88703000 |
| H | 3.92387600  | -2.37445200 | 1.67518500  |
| C | 1.38607500  | -0.73415700 | -1.92510800 |
| O | 1.23693000  | -1.13725700 | -3.08850500 |
| N | 0.53011400  | 0.06252900  | -1.23448500 |
| C | -0.75836600 | 0.34225800  | -1.68842600 |
| C | -1.45726300 | 1.34978300  | -0.94881200 |
| C | -1.44754200 | -0.27285300 | -2.72565700 |
| C | -2.78706200 | 1.71691400  | -1.27569200 |
| C | -2.77403300 | 0.08817800  | -3.03843500 |
| H | -0.95512500 | -1.04087900 | -3.30884700 |
| C | -1.39699100 | 2.88512200  | 0.80336200  |
| C | -3.39405600 | 2.72793900  | -0.49833200 |
| C | -3.44312000 | 1.06507400  | -2.34442500 |
| H | -3.26835100 | -0.42809300 | -3.85883800 |

|    |             |             |             |    |             |             |             |
|----|-------------|-------------|-------------|----|-------------|-------------|-------------|
| C  | -2.70517400 | 3.31510300  | 0.53504700  | H  | -3.21610400 | -0.37924200 | -3.89958800 |
| H  | -0.81976000 | 3.31764700  | 1.61873500  | C  | -2.67029400 | 3.36316900  | 0.49905500  |
| H  | -4.41374800 | 3.02889800  | -0.73305900 | H  | -0.81011600 | 3.31634300  | 1.62667000  |
| H  | -4.46389900 | 1.34719200  | -2.59336800 | H  | -4.35001900 | 3.12586800  | -0.81471500 |
| H  | -3.15035400 | 4.09387300  | 1.14639200  | H  | -4.39583300 | 1.43069500  | -2.67586700 |
| N  | -0.80109400 | 1.94356800  | 0.09011000  | H  | -3.10366400 | 4.16342800  | 1.08883000  |
| Co | 1.04547700  | 1.08859000  | 0.43646400  | N  | -0.80270400 | 1.92412900  | 0.12098200  |
| C  | 0.98825900  | -0.76114500 | 1.70120800  | Co | 1.04140300  | 1.07235700  | 0.47661000  |
| C  | 1.40724800  | -1.93609400 | 0.87305300  | C  | 1.00106200  | -0.89079300 | 1.79847100  |
| C  | 2.83900700  | 2.60865000  | 1.14637200  | C  | 1.41031300  | -2.02920000 | 0.92463000  |
| O  | 1.70908600  | 2.65116800  | 1.72446400  | C  | 2.76057400  | 2.74108800  | 1.03770300  |
| O  | 3.01107100  | 1.76505200  | 0.21054600  | O  | 1.72053100  | 2.64668800  | 1.75987900  |
| C  | 3.92533800  | 3.55183300  | 1.53645900  | O  | 2.88278200  | 1.96908200  | 0.03483600  |
| H  | 3.98011200  | 3.63421100  | 2.62578100  | C  | 3.83896200  | 3.71943700  | 1.37694500  |
| H  | 4.88859600  | 3.23838700  | 1.12860100  | H  | 4.50102200  | 3.25933400  | 2.11942900  |
| H  | 3.68089000  | 4.54598100  | 1.14416500  | H  | 4.43040400  | 3.96743700  | 0.49409600  |
| H  | 1.73050800  | -0.36652000 | 2.40545100  | H  | 3.41172800  | 4.62180500  | 1.81896900  |
| H  | 1.59405100  | -2.79498800 | 1.54112400  | H  | 1.74885800  | -0.46142700 | 2.46825800  |
| H  | 0.58811500  | -2.23756800 | 0.20939200  | H  | 1.59553100  | -2.91323900 | 1.55674300  |
| H  | -0.04327300 | -0.73126400 | 2.06112800  | H  | 0.59135400  | -2.29589600 | 0.25012500  |
|    |             |             |             | H  | -0.03664200 | -0.82109900 | 2.12418400  |

INT2\_H\_Q(pbe0)

|   |             |             |             |
|---|-------------|-------------|-------------|
| C | 5.10161800  | -1.74150000 | 0.05877600  |
| C | 5.06738400  | -1.17297100 | -1.21340600 |
| C | 3.84204100  | -0.88913200 | -1.80347100 |
| C | 2.64373700  | -1.13187500 | -1.12382800 |
| C | 2.67133400  | -1.72503100 | 0.15071700  |
| C | 3.91198100  | -2.02392400 | 0.72214100  |
| H | 6.05268300  | -1.97849300 | 0.52789300  |
| H | 5.99038500  | -0.95945900 | -1.74500200 |
| H | 3.79911300  | -0.46099600 | -2.80134600 |
| H | 3.93755800  | -2.49434800 | 1.70264200  |
| C | 1.37102500  | -0.79268900 | -1.84732700 |
| O | 1.22356900  | -1.22240300 | -3.00383700 |
| N | 0.51131500  | -0.00259400 | -1.16502400 |
| C | -0.75661800 | 0.30913500  | -1.64533100 |
| C | -1.44730000 | 1.34199800  | -0.92832200 |
| C | -1.43078900 | -0.28457800 | -2.70620500 |
| C | -2.75522800 | 1.75099100  | -1.29992100 |
| C | -2.73437300 | 0.11883400  | -3.06243900 |
| H | -0.94011300 | -1.06348900 | -3.27260800 |
| C | -1.38374600 | 2.89326200  | 0.80706900  |
| C | -3.35120500 | 2.78992300  | -0.54859600 |
| C | -3.39622900 | 1.11727900  | -2.38987400 |

INT2\_H\_Q(wb97xd)

|   |             |             |             |
|---|-------------|-------------|-------------|
| C | 4.67553700  | -0.83106900 | -0.08135700 |
| C | 4.14766900  | -1.20799700 | -1.31478700 |
| C | 2.82105900  | -1.61451600 | -1.39763300 |
| C | 2.00546000  | -1.62035300 | -0.26274200 |
| C | 2.53549900  | -1.26340900 | 0.98764500  |
| C | 3.87585600  | -0.87185200 | 1.05648000  |
| H | 5.71265000  | -0.51882700 | -0.00297500 |
| H | 4.76789000  | -1.19116600 | -2.20571900 |
| H | 2.40072700  | -1.91797400 | -2.35255400 |
| H | 4.29660100  | -0.60244000 | 2.02232400  |
| C | 0.56756500  | -2.04821700 | -0.43691900 |
| O | 0.33860100  | -3.20754600 | -0.81893100 |
| N | -0.33619600 | -1.07603900 | -0.18453700 |
| C | -1.71789500 | -1.29266200 | -0.22105700 |
| C | -2.52969900 | -0.11253500 | -0.08261500 |
| C | -2.38070700 | -2.50329300 | -0.34692500 |
| C | -3.94341200 | -0.18873000 | -0.08748700 |
| C | -3.79309000 | -2.57232000 | -0.34273900 |
| H | -1.80749300 | -3.41212400 | -0.45516300 |

|    |             |             |             |    |             |             |             |
|----|-------------|-------------|-------------|----|-------------|-------------|-------------|
| C  | -2.59437300 | 2.20194200  | 0.17736900  | H  | -1.15490700 | -1.08086200 | -3.49742900 |
| C  | -4.66691100 | 1.02153600  | 0.04389600  | C  | -0.82532900 | 2.50385100  | 0.91823300  |
| C  | -4.57216900 | -1.45213500 | -0.22110900 | C  | -2.88174700 | 2.80402800  | -0.29021600 |
| H  | -4.26017200 | -3.54758700 | -0.44315500 | C  | -3.25061800 | 1.33390300  | -2.28909400 |
| C  | -3.99954900 | 2.21356800  | 0.17344100  | H  | -3.34545900 | -0.00597300 | -3.94627900 |
| H  | -2.02668200 | 3.12166200  | 0.28139100  | C  | -2.05610400 | 3.16189400  | 0.74843800  |
| H  | -5.75277900 | 0.98944800  | 0.04013600  | H  | -0.14850600 | 2.75867600  | 1.73071500  |
| H  | -5.65614700 | -1.50962400 | -0.22419000 | H  | -3.83869600 | 3.30084700  | -0.43903000 |
| H  | -4.52786400 | 3.15423600  | 0.27455200  | H  | -4.21167300 | 1.80100700  | -2.49260200 |
| N  | -1.89412800 | 1.08901100  | 0.05455900  | H  | -2.33339800 | 3.94493200  | 1.44725100  |
| Co | 0.18086700  | 0.86875000  | 0.11084100  | N  | -0.43393500 | 1.54496800  | 0.09534700  |
| C  | 1.12637800  | 0.06382400  | 2.58238400  | Co | 1.15956900  | 0.54463100  | 0.17619900  |
| C  | 1.69475500  | -1.27731700 | 2.25136100  | C  | 0.38787200  | -0.76093900 | 1.33333200  |
| C  | 1.53034500  | 2.80879100  | -0.55940700 | C  | 1.29106100  | -1.92582400 | 0.98909200  |
| O  | 0.72575200  | 2.91475800  | 0.41712700  | C  | 2.72065500  | 2.31931800  | 0.70573500  |
| O  | 1.60736200  | 1.69733700  | -1.17253500 | O  | 2.05020300  | 1.61155500  | 1.54081200  |
| C  | 2.40258900  | 3.96017600  | -0.96034000 | O  | 2.54143200  | 2.13881700  | -0.52684600 |
| H  | 3.29642100  | 3.94927400  | -0.32724600 | C  | 3.71894000  | 3.29726000  | 1.22556200  |
| H  | 2.71382800  | 3.86651300  | -2.00159000 | H  | 4.65443800  | 2.76070900  | 1.42687900  |
| H  | 1.88344700  | 4.90662500  | -0.79919800 | H  | 3.91967300  | 4.07683200  | 0.48682600  |
| H  | 1.76501700  | 0.94374200  | 2.52819900  | H  | 3.37622700  | 3.73863100  | 2.16548900  |
| H  | 2.33333400  | -1.61310200 | 3.08481200  | H  | 0.53796900  | -0.35296500 | 2.34110900  |
| H  | 0.88851300  | -2.01279100 | 2.17227900  | H  | 1.60918900  | -2.47720400 | 1.88395800  |
| H  | 0.20876500  | 0.13870300  | 3.15977000  | H  | 0.77391500  | -2.63489000 | 0.33239000  |
|    |             |             |             | H  | -0.67445700 | -0.92983000 | 1.13004400  |

INT2\_H\_S(m06)

|   |             |             |             |
|---|-------------|-------------|-------------|
| C | 4.89854600  | -0.82181900 | 0.38858400  |
| C | 4.94197600  | -0.69206900 | -1.00212500 |
| C | 3.79398000  | -0.89216000 | -1.75230500 |
| C | 2.58802300  | -1.21718700 | -1.12328300 |
| C | 2.53975100  | -1.40941500 | 0.27926000  |
| C | 3.71930300  | -1.19602000 | 1.01285600  |
| H | 5.79589800  | -0.65362000 | 0.97952500  |
| H | 5.87278400  | -0.42037300 | -1.49461300 |
| H | 3.80424600  | -0.76821200 | -2.83366300 |
| H | 3.69436700  | -1.34512000 | 2.09225000  |
| C | 1.33386300  | -1.17024900 | -1.94626600 |
| O | 1.20140800  | -1.73339600 | -3.03896500 |
| N | 0.47281700  | -0.34258800 | -1.32969400 |
| C | -0.75395300 | 0.11728500  | -1.76748700 |
| C | -1.24339800 | 1.16344700  | -0.94170000 |
| C | -1.51687300 | -0.29102900 | -2.84685600 |
| C | -2.49045200 | 1.77798900  | -1.18052200 |
| C | -2.76130800 | 0.32906500  | -3.09196500 |

INT2\_H\_S(pbe0)

|   |             |             |             |
|---|-------------|-------------|-------------|
| C | 4.96118600  | -0.99303300 | 0.36330700  |
| C | 4.98389300  | -0.78418000 | -1.01787800 |
| C | 3.81305300  | -0.89959300 | -1.75342500 |
| C | 2.60660600  | -1.21068300 | -1.11586800 |
| C | 2.57878500  | -1.47040700 | 0.27470700  |
| C | 3.77623500  | -1.34582400 | 0.99520700  |
| H | 5.87495900  | -0.89751900 | 0.94291400  |
| H | 5.91403000  | -0.52409600 | -1.51486400 |
| H | 3.81133600  | -0.72568400 | -2.82597100 |
| H | 3.76736900  | -1.54755900 | 2.06356500  |
| C | 1.33730200  | -1.14120500 | -1.91900300 |
| O | 1.17773400  | -1.73499400 | -2.99348600 |
| N | 0.48988200  | -0.28865800 | -1.31832700 |
| C | -0.75260600 | 0.12595100  | -1.75135000 |
| C | -1.26843500 | 1.17066300  | -0.93671600 |
| C | -1.51390900 | -0.31542000 | -2.82061800 |
| C | -2.52964500 | 1.75761200  | -1.17931400 |

C -2.77436400 0.27245200 -3.06692800  
 H -1.13822000 -1.10163800 -3.46345300  
 C -0.86579100 2.54711200 0.90000000  
 C -2.93519500 2.79157900 -0.30311900  
 C -3.28459300 1.27984600 -2.27834500  
 H -3.35337000 -0.08841300 -3.91241700  
 C -2.10838700 3.18062600 0.72529700  
 H -0.18649600 2.82547000 1.69859300  
 H -3.89864100 3.27099400 -0.45298900  
 H -4.25454200 1.72057700 -2.48734300  
 H -2.39339700 3.97109100 1.41065100  
 N -0.46616100 1.58085300 0.09047000  
 Co 1.14144700 0.63853700 0.17312900  
 C 0.44519400 -0.68863200 1.33563900  
 C 1.29640500 -1.89965900 0.97608600  
 C 2.71142700 2.42236900 0.69672100  
 O 2.02398300 1.71422600 1.52189200  
 O 2.53975400 2.24996400 -0.53818500  
 C 3.71123700 3.39169100 1.23519300  
 H 4.61396400 2.83651000 1.51448500  
 H 3.97432800 4.13413600 0.48041600  
 H 3.32486500 3.87765900 2.13413600  
 H 0.64529300 -0.30199200 2.34065500  
 H 1.56758800 -2.47305600 1.86997100  
 H 0.73894700 -2.56755200 0.31247500  
 H -0.62575500 -0.85222000 1.19303500

INT2\_H\_S(wb97xd)

C 4.43675500 -0.26364700 0.07555100  
 C 4.11753800 -0.97619900 -1.08227900  
 C 2.90180800 -1.63875000 -1.17111000  
 C 1.99090000 -1.58728600 -0.11080000  
 C 2.31954400 -0.90743000 1.08213100  
 C 3.55304100 -0.24290900 1.14610400  
 H 5.38447400 0.26096000 0.14745000  
 H 4.81442500 -1.00699800 -1.91392500  
 H 2.63413200 -2.18466200 -2.07096700  
 H 3.81891000 0.28220500 2.05962900  
 C 0.61650200 -2.17420400 -0.32055400  
 O 0.43113600 -3.33984900 -0.69444400  
 N -0.30672400 -1.22253900 -0.10929400  
 C -1.68358100 -1.32433000 -0.23245500  
 C -2.32320400 -0.06619100 -0.04235900

C -2.46835400 -2.42652500 -0.50788600  
 C -3.72103400 0.08055900 -0.12480800  
 C -3.87440400 -2.28191500 -0.59068400  
 H -2.00918400 -3.39371500 -0.66456700  
 C -2.01147200 2.19959300 0.40697700  
 C -4.24630900 1.38105500 0.07544600  
 C -4.49881100 -1.07207000 -0.40761700  
 H -4.46938500 -3.16320800 -0.80989100  
 C -3.39791700 2.42868700 0.33719900  
 H -1.31061900 3.00050900 0.61411200  
 H -5.31936900 1.53738300 0.01822500  
 H -5.57766400 -0.97941800 -0.47928100  
 H -3.77122100 3.43375700 0.49297400  
 N -1.50062900 0.99646300 0.21923500  
 Co 0.31295900 0.50975800 0.27876900  
 C 0.28425200 0.14463700 2.14589200  
 C 1.38160600 -0.91083000 2.28922000  
 C 1.32572300 2.35501500 -0.88754300  
 O 1.08661100 2.28923600 0.37236300  
 O 0.95466800 1.39565900 -1.61586000  
 C 2.06402100 3.53460700 -1.43653700  
 H 3.13278900 3.38790000 -1.24720800  
 H 1.90479100 3.62083700 -2.51196300  
 H 1.75189300 4.44856600 -0.92720300  
 H 0.54162800 1.09491800 2.62492900  
 H 1.98077900 -0.73410300 3.18840200  
 H 0.93542600 -1.90509700 2.38281600  
 H -0.68995800 -0.20275900 2.49703700

INT2\_H\_T(m06)

C 5.07710400 -1.86933300 0.16573900  
 C 5.08455400 -1.39442600 -1.14314000  
 C 3.88149700 -1.09966300 -1.77227800  
 C 2.66736600 -1.24396900 -1.09606600  
 C 2.65247000 -1.74891300 0.21650500  
 C 3.86850700 -2.05424200 0.82985500  
 H 6.01256800 -2.11126600 0.66561100  
 H 6.02424200 -1.26045400 -1.67421900  
 H 3.86876000 -0.74198100 -2.80048600  
 H 3.85946000 -2.45783900 1.84219000  
 C 1.41603000 -0.88855000 -1.84753600  
 O 1.27297800 -1.31507100 -3.00311300  
 N 0.56573700 -0.06708000 -1.18400900  
 C -0.68912100 0.29997900 -1.66996500

C -1.36980000 1.29089500 -0.89053400  
 C -1.35456900 -0.20150300 -2.78022800  
 C -2.66210100 1.75235300 -1.24457300  
 C -2.64464200 0.25546800 -3.12214100  
 H -0.87265700 -0.94936400 -3.39724400  
 C -1.28854800 2.71477100 0.94704100  
 C -3.24556800 2.74445000 -0.42404200  
 C -3.29789100 1.21224700 -2.38553000  
 H -3.12333300 -0.16807400 -4.00268100  
 C -2.56469300 3.23042000 0.66543300  
 H -0.71087000 3.07170300 1.80019900  
 H -4.23801200 3.11576700 -0.67430700  
 H -4.28987100 1.56543300 -2.65938100  
 H -2.98947900 3.99614600 1.30731300  
 N -0.72496000 1.78141800 0.20257200  
 Co 1.17232500 0.97104700 0.39365000  
 C 0.84884200 -0.71974000 1.61453400  
 C 1.35681400 -1.96653300 0.95913100  
 C 2.68724300 2.89225500 0.79758600  
 O 2.44371200 1.90215000 1.58619200  
 O 2.11816200 2.94514600 -0.31721200  
 C 3.64593800 3.93827800 1.25992100  
 H 4.61782900 3.47550500 1.46261600  
 H 3.76131900 4.72616400 0.51294800  
 H 3.28996300 4.36856200 2.20215300  
 H 1.46135700 -0.32851600 2.43412500  
 H 1.52455100 -2.72227000 1.74408800  
 H 0.59226500 -2.37468300 0.28816000  
 H -0.22818700 -0.65878600 1.79007100

INT2\_H\_T(pbe0)

C 5.07567600 -1.90678000 0.14156100  
 C 5.08849000 -1.40398900 -1.15834300  
 C 3.88827800 -1.08393600 -1.78213300  
 C 2.67343100 -1.22860000 -1.10589500  
 C 2.65228200 -1.75369300 0.19882900  
 C 3.86530100 -2.08976600 0.80453700  
 H 6.00739500 -2.17005500 0.63468800  
 H 6.02856800 -1.26933100 -1.68580700  
 H 3.87897800 -0.70787300 -2.80163100  
 H 3.85421200 -2.51038200 1.80736200  
 C 1.41848200 -0.86552000 -1.84655900  
 O 1.26884700 -1.28680000 -3.00511700  
 N 0.56846300 -0.05629000 -1.17366700

C -0.68693300 0.29636200 -1.65611600  
 C -1.36629800 1.30023600 -0.89253400  
 C -1.35689000 -0.23152400 -2.75313600  
 C -2.66789800 1.74405400 -1.24264500  
 C -2.65230500 0.21153700 -3.09377900  
 H -0.87340200 -0.98611600 -3.35717100  
 C -1.27722500 2.74972200 0.92000100  
 C -3.25319800 2.74277200 -0.42966800  
 C -3.30837100 1.17766700 -2.36927000  
 H -3.13417200 -0.23089000 -3.96150100  
 C -2.56332500 3.24652000 0.64725100  
 H -0.69618000 3.12301200 1.75957700  
 H -4.24996100 3.10251700 -0.67106200  
 H -4.30359400 1.51515900 -2.64309900  
 H -2.98804800 4.01364700 1.28558500  
 N -0.71087900 1.81487100 0.17955800  
 Co 1.18837600 0.99119700 0.39643700  
 C 0.85419200 -0.69765500 1.58644900  
 C 1.34841600 -1.95496800 0.93302000  
 C 2.69788800 2.89411800 0.84410600  
 O 2.41622700 1.93303700 1.65174300  
 O 2.15578400 2.91892100 -0.28927900  
 C 3.65105600 3.95263800 1.29736200  
 H 4.57953300 3.48669700 1.64016700  
 H 3.86095200 4.66036800 0.49484800  
 H 3.21605800 4.48275400 2.15091000  
 H 1.46482700 -0.32720800 2.41404100  
 H 1.49914200 -2.71189500 1.71697900  
 H 0.58612600 -2.34460500 0.25243300  
 H -0.22100700 -0.63202900 1.75991500

INT2\_H\_T(wb97xd)

C 4.86960100 -0.65246600 0.26401300  
 C 4.49546700 -1.04349600 -1.01977700  
 C 3.18658600 -1.44560000 -1.26071800  
 C 2.23663000 -1.43059700 -0.23618300  
 C 2.61208200 -1.05290600 1.06493900  
 C 3.93497500 -0.66879900 1.29553900  
 H 5.89155500 -0.34561100 0.46554800  
 H 5.22096500 -1.04230300 -1.82745300  
 H 2.88622300 -1.76890800 -2.25326000  
 H 4.23463800 -0.38588700 2.30140200  
 C 0.83971100 -1.89157300 -0.57126500

|             |             |             |             |              |             |             |             |
|-------------|-------------|-------------|-------------|--------------|-------------|-------------|-------------|
| O           | 0.70793700  | -2.96606000 | -1.17990400 | C            | 0.71935800  | -2.19737600 | -0.20515600 |
| N           | -0.15177300 | -1.05279700 | -0.19408100 | O            | 0.50317800  | -3.37039200 | -0.54207400 |
| C           | -1.50699300 | -1.38131100 | -0.30134000 | N            | -0.21509500 | -1.25953700 | 0.08916600  |
| C           | -2.41576700 | -0.31703000 | 0.02136300  | C            | -1.58378100 | -1.39460800 | -0.08345900 |
| C           | -2.06144500 | -2.60599800 | -0.63818600 | C            | -2.27412100 | -0.15125700 | -0.02829600 |
| C           | -3.81764900 | -0.50624100 | -0.01095800 | C            | -2.32474400 | -2.54535500 | -0.30386300 |
| C           | -3.46341000 | -2.79070800 | -0.66384900 | C            | -3.67515100 | -0.06987100 | -0.19517200 |
| H           | -1.41519500 | -3.43316200 | -0.89085600 | C            | -3.72364300 | -2.46189600 | -0.46920600 |
| C           | -2.65944400 | 1.90718600  | 0.65410700  | H            | -1.82578800 | -3.50642600 | -0.35212700 |
| C           | -4.63480100 | 0.60361700  | 0.31686300  | C            | -2.08073000 | 2.14861500  | 0.25228800  |
| C           | -4.33592300 | -1.77728400 | -0.36361600 | C            | -4.25811800 | 1.21633700  | -0.12904700 |
| H           | -3.84636400 | -3.77008200 | -0.93513300 | C            | -4.39812700 | -1.26463000 | -0.42005700 |
| C           | -4.06251900 | 1.80639100  | 0.64661800  | H            | -4.27698900 | -3.38267400 | -0.64164900 |
| H           | -2.16489700 | 2.84108400  | 0.90635600  | C            | -3.46735800 | 2.31737100  | 0.09114600  |
| H           | -5.71461800 | 0.48651800  | 0.30127000  | H            | -1.42636100 | 2.99871500  | 0.43898300  |
| H           | -5.41080700 | -1.92643400 | -0.39039100 | H            | -5.33476400 | 1.31719200  | -0.25418600 |
| H           | -4.66323800 | 2.67227200  | 0.89936400  | H            | -5.47675300 | -1.21522500 | -0.55261200 |
| N           | -1.87657100 | 0.88779800  | 0.35822700  | H            | -3.88904200 | 3.31617900  | 0.14771400  |
| Co          | 0.21289900  | 0.86409200  | 0.27253100  | N            | -1.50865300 | 0.95969500  | 0.18886500  |
| C           | 0.78491000  | 0.21593800  | 2.23423800  | Co           | 0.38329700  | 0.49974600  | 0.42221500  |
| C           | 1.60540000  | -1.04397500 | 2.19739800  | C            | 0.01215300  | 0.38246300  | 2.34820100  |
| C           | 0.90877000  | 2.92412700  | -0.93009000 | C            | 1.36007600  | -0.02018500 | 2.25005500  |
| O           | 1.15541700  | 2.63276200  | 0.29787200  | C            | 1.12175800  | 2.33506600  | -0.86299700 |
| O           | 0.22659000  | 2.12957900  | -1.62349200 | O            | 1.00451100  | 2.34622600  | 0.41168200  |
| C           | 1.44746200  | 4.20962500  | -1.48376800 | O            | 0.80361600  | 1.26774400  | -1.46372600 |
| H           | 2.53817900  | 4.20756700  | -1.40062800 | C            | 1.65644300  | 3.52216700  | -1.57733200 |
| H           | 1.15640400  | 4.33871500  | -2.52632100 | H            | 2.74801200  | 3.52622000  | -1.46578800 |
| H           | 1.07228900  | 5.04538600  | -0.88617000 | H            | 1.41252400  | 3.47908900  | -2.64114200 |
| H           | 1.33565700  | 1.13364600  | 2.45173400  | H            | 1.27061400  | 4.44296500  | -1.13081300 |
| H           | 2.14574700  | -1.11888500 | 3.15178400  | H            | -0.22328000 | 1.40520400  | 2.64517200  |
| H           | 0.94727500  | -1.91392800 | 2.13263800  | H            | 2.12883800  | 0.69771800  | 2.52940600  |
| H           | -0.19131700 | 0.14796400  | 2.71462100  | H            | 1.60227900  | -1.05830900 | 2.46824400  |
| TS_H_S(m06) |             |             |             | H            | -0.75902600 | -0.36096000 | 2.54483900  |
| C           | 4.53148400  | -0.31714400 | -0.17845100 | TS_H_S(pbe0) |             |             |             |
| C           | 4.41713300  | -1.61122600 | -0.68678900 | C            | -4.81893900 | -1.62371700 | 0.22808300  |
| C           | 3.18396800  | -2.25259600 | -0.66672600 | C            | -4.46401900 | -2.39086800 | 1.33943300  |
| C           | 2.07514100  | -1.60316100 | -0.13010700 | C            | -3.14887800 | -2.38194000 | 1.79385000  |
| C           | 2.18972500  | -0.30802200 | 0.40435200  | C            | -2.19461000 | -1.61409200 | 1.13017200  |
| C           | 3.42816600  | 0.33166200  | 0.37253200  | C            | -2.53897300 | -0.85844500 | -0.00592500 |
| H           | 5.49337300  | 0.19152500  | -0.20242000 | C            | -3.86279700 | -0.86760000 | -0.44797800 |
| H           | 5.28773100  | -2.11158100 | -1.10440900 | H            | -5.84810100 | -1.62063500 | -0.12148000 |
| H           | 3.05852000  | -3.25141300 | -1.08225400 | H            | -5.21452000 | -2.98550900 | 1.85228200  |
| H           | 3.54157700  | 1.33270700  | 0.78833600  | H            | -2.85156900 | -2.94782200 | 2.67310400  |

|    |             |             |             |    |             |             |             |
|----|-------------|-------------|-------------|----|-------------|-------------|-------------|
| H  | -4.14931800 | -0.29571700 | -1.32703200 | H  | -5.21371900 | -2.99802600 | 1.85761400  |
| C  | -0.81394100 | -1.46712300 | 1.65346100  | H  | -2.85807400 | -2.94106700 | 2.68353600  |
| O  | -0.33871500 | -2.18380700 | 2.54848300  | H  | -4.15701100 | -0.32149900 | -1.33265700 |
| N  | -0.20511000 | -0.41977300 | 1.05186400  | C  | -0.81675200 | -1.45662200 | 1.66346000  |
| C  | 1.01019700  | 0.12780500  | 1.41427100  | O  | -0.34792000 | -2.17426100 | 2.56042400  |
| C  | 1.24197300  | 1.39725800  | 0.81170600  | N  | -0.20847600 | -0.41097900 | 1.06242400  |
| C  | 1.98045900  | -0.38107700 | 2.26532300  | C  | 1.01533700  | 0.13620100  | 1.42420200  |
| C  | 2.41962100  | 2.13938500  | 1.06308100  | C  | 1.25295200  | 1.40515700  | 0.81694100  |
| C  | 3.15636900  | 0.35945400  | 2.51269200  | C  | 1.98174100  | -0.37504200 | 2.27102900  |
| H  | 1.82923100  | -1.34218300 | 2.73868900  | C  | 2.43089300  | 2.13890200  | 1.06691300  |
| C  | 0.39784400  | 3.02989100  | -0.60921000 | C  | 3.16509600  | 0.36040300  | 2.51841300  |
| C  | 2.53893000  | 3.39332200  | 0.41863200  | H  | 1.83027700  | -1.33415900 | 2.74667100  |
| C  | 3.38726100  | 1.58869700  | 1.93742000  | C  | 0.42177100  | 3.04037100  | -0.60934900 |
| H  | 3.89835000  | -0.06442900 | 3.18388700  | C  | 2.56074900  | 3.39327700  | 0.42068200  |
| C  | 1.53351400  | 3.83483300  | -0.40842200 | C  | 3.39925100  | 1.58490800  | 1.94308100  |
| H  | -0.40917700 | 3.34232400  | -1.26446700 | H  | 3.90452700  | -0.06712600 | 3.18892100  |
| H  | 3.42773600  | 3.99569200  | 0.58588200  | C  | 1.56245700  | 3.84063000  | -0.40790100 |
| H  | 4.29616800  | 2.14587400  | 2.14340400  | H  | -0.38072500 | 3.35819400  | -1.26698600 |
| H  | 1.59736300  | 4.79132600  | -0.91548400 | H  | 3.45291900  | 3.98918800  | 0.58928700  |
| N  | 0.26064200  | 1.85836400  | -0.01575000 | H  | 4.31020300  | 2.13865400  | 2.14672600  |
| Co | -1.19190600 | 0.58194900  | -0.19350400 | H  | 1.63309100  | 4.79510300  | -0.91596500 |
| C  | -0.21843000 | -0.17091000 | -1.72054400 | N  | 0.27414000  | 1.87153900  | -0.01669700 |
| C  | -1.31540200 | -1.05203600 | -1.60207900 | Co | -1.20124600 | 0.58871400  | -0.19580800 |
| C  | -2.84956300 | 2.24444000  | -0.10526400 | C  | -0.23052600 | -0.17475200 | -1.74232800 |
| O  | -2.34667600 | 1.78904800  | -1.19060000 | C  | -1.31199000 | -1.06827900 | -1.62710000 |
| O  | -2.40678000 | 1.75812600  | 0.97733000  | C  | -2.86629300 | 2.25607700  | -0.10315100 |
| C  | -3.92744700 | 3.26864400  | -0.13729500 | O  | -2.36591500 | 1.80520300  | -1.19052600 |
| H  | -4.87423400 | 2.76386100  | -0.36113900 | O  | -2.42161700 | 1.76874300  | 0.97743300  |
| H  | -4.01335100 | 3.76710600  | 0.82926700  | C  | -3.95032300 | 3.28067100  | -0.13117300 |
| H  | -3.73566900 | 3.99525500  | -0.93013400 | H  | -4.89271700 | 2.77413100  | -0.36564700 |
| H  | -0.24461000 | 0.60897700  | -2.47826900 | H  | -4.04211600 | 3.76974300  | 0.83915800  |
| H  | -2.13519100 | -0.94130800 | -2.30515400 | H  | -3.75405100 | 4.01505800  | -0.91505400 |
| H  | -1.12136000 | -2.07102000 | -1.28173800 | H  | -0.26758700 | 0.60476300  | -2.49892400 |
| H  | 0.76801900  | -0.50499300 | -1.41128500 | H  | -2.13827000 | -0.96412300 | -2.32198600 |
|    |             |             |             | H  | -1.11238100 | -2.08133800 | -1.29548600 |
|    |             |             |             | H  | 0.75965600  | -0.49787900 | -1.43608600 |

TS\_H\_S(wb97xd)

|   |             |             |             |
|---|-------------|-------------|-------------|
| C | -4.82356800 | -1.64622200 | 0.22514200  |
| C | -4.46656100 | -2.40259700 | 1.34219000  |
| C | -3.15288300 | -2.38166300 | 1.80019900  |
| C | -2.20198300 | -1.61298900 | 1.13370500  |
| C | -2.54734700 | -0.86955500 | -0.00706800 |
| C | -3.86953500 | -0.88900800 | -0.45175900 |
| H | -5.85107900 | -1.65181500 | -0.12693400 |

TS\_H\_T(m06)

|   |            |             |             |
|---|------------|-------------|-------------|
| C | 4.51981000 | -0.37988700 | -0.19833100 |
| C | 4.38806100 | -1.68860100 | -0.65720500 |
| C | 3.15118200 | -2.32150800 | -0.59149400 |
| C | 2.04953100 | -1.65725800 | -0.05878600 |
| C | 2.19774700 | -0.35146900 | 0.44850900  |
| C | 3.43251800 | 0.28659500  | 0.36507100  |



|              |             |             |             |                |             |             |             |
|--------------|-------------|-------------|-------------|----------------|-------------|-------------|-------------|
| H            | 5.48087400  | 0.12632400  | -0.26201000 | C              | 3.44855100  | 0.31307100  | 0.36688900  |
| H            | 5.24510600  | -2.20744100 | -1.07997300 | H              | 5.50058800  | 0.15278100  | -0.24980600 |
| H            | 3.01100200  | -3.32811800 | -0.98301200 | H              | 5.27895700  | -2.19478800 | -1.03053000 |
| H            | 3.55753700  | 1.29613700  | 0.75501800  | H              | 3.05360100  | -3.32828800 | -0.92455400 |
| C            | 0.68897000  | -2.26061600 | -0.15595500 | H              | 3.56079300  | 1.32743900  | 0.74073600  |
| O            | 0.50364200  | -3.46783800 | -0.35710000 | C              | 0.71378800  | -2.25176900 | -0.12315200 |
| N            | -0.25128600 | -1.28915700 | -0.05281700 | O              | 0.53440800  | -3.46656800 | -0.30494300 |
| C            | -1.62157200 | -1.43231200 | -0.18904200 | N              | -0.22135500 | -1.28122400 | -0.03776100 |
| C            | -2.32853400 | -0.19530500 | -0.06291100 | C              | -1.58459800 | -1.43926600 | -0.18414100 |
| C            | -2.35492300 | -2.58071700 | -0.43952700 | C              | -2.32087100 | -0.21421100 | -0.07302300 |
| C            | -3.73522800 | -0.13645100 | -0.19816000 | C              | -2.29693500 | -2.60387800 | -0.43434500 |
| C            | -3.75902100 | -2.51693900 | -0.56819200 | C              | -3.73019500 | -0.18808600 | -0.22043500 |
| H            | -1.84069900 | -3.53017600 | -0.54196700 | C              | -3.70046800 | -2.57058800 | -0.57735400 |
| C            | -2.19010300 | 2.10010400  | 0.30511200  | H              | -1.76266000 | -3.54079300 | -0.52500100 |
| C            | -4.34760100 | 1.13102400  | -0.07211900 | C              | -2.23964000 | 2.08568800  | 0.28261700  |
| C            | -4.44653100 | -1.33285900 | -0.45512300 | C              | -4.37247400 | 1.06650200  | -0.10630500 |
| H            | -4.30259900 | -3.43817100 | -0.76684000 | C              | -4.41544700 | -1.40040500 | -0.47719400 |
| C            | -3.58162100 | 2.24436000  | 0.17375600  | H              | -4.22154100 | -3.50323100 | -0.77578000 |
| H            | -1.55005400 | 2.95725300  | 0.51124500  | C              | -3.63218300 | 2.19872200  | 0.14001000  |
| H            | -5.42874700 | 1.20785900  | -0.17412500 | H              | -1.61873300 | 2.95335100  | 0.48456400  |
| H            | -5.52845500 | -1.29198800 | -0.56209000 | H              | -5.45226900 | 1.12067100  | -0.21690500 |
| H            | -4.02629700 | 3.22967600  | 0.27374300  | H              | -5.49491500 | -1.38469600 | -0.59435700 |
| N            | -1.59027900 | 0.92874000  | 0.18780200  | H              | -4.09871900 | 3.17347600  | 0.23067900  |
| Co           | 0.36474900  | 0.51508200  | 0.36761100  | N              | -1.61363400 | 0.92673200  | 0.17605000  |
| C            | 0.12239800  | 0.49683100  | 2.39489600  | Co             | 0.36626700  | 0.56983200  | 0.34832300  |
| C            | 1.44831200  | 0.03707300  | 2.28652500  | C              | 0.14493000  | 0.52111300  | 2.41833300  |
| C            | 1.20785200  | 2.53714500  | -0.82905800 | C              | 1.46862600  | 0.07455700  | 2.32919400  |
| O            | 1.08347000  | 2.62359800  | 0.42472900  | C              | 1.12965000  | 2.60817300  | -0.86179900 |
| O            | 0.88150800  | 1.45412700  | -1.41400200 | O              | 0.89968400  | 2.73412500  | 0.37394100  |
| C            | 1.78497700  | 3.66238000  | -1.62339200 | O              | 0.97824300  | 1.46730200  | -1.41209800 |
| H            | 2.87452900  | 3.53462900  | -1.65157400 | C              | 1.62162100  | 3.76152400  | -1.67802200 |
| H            | 1.41573000  | 3.64853100  | -2.65198600 | H              | 2.71756000  | 3.73652400  | -1.68013200 |
| H            | 1.56845300  | 4.62410500  | -1.15128900 | H              | 1.27959800  | 3.67818400  | -2.71157700 |
| H            | -0.08074000 | 1.54588300  | 2.60901200  | H              | 1.29950800  | 4.70907700  | -1.24253200 |
| H            | 2.24070200  | 0.74216800  | 2.52728000  | H              | -0.07266800 | 1.56849100  | 2.61109100  |
| H            | 1.64732500  | -0.99800300 | 2.55735100  | H              | 2.26035000  | 0.78336100  | 2.54792500  |
| H            | -0.68974700 | -0.20404800 | 2.58375300  | H              | 1.67607900  | -0.96245200 | 2.57348800  |
|              |             |             |             | H              | -0.66227300 | -0.18958200 | 2.57418500  |
| TS_H_T(pbe0) |             |             |             |                |             |             |             |
| C            | 4.54292800  | -0.35631000 | -0.18180700 |                |             |             |             |
| C            | 4.41808900  | -1.67450800 | -0.62071700 | TS_H_T(wb97xd) |             |             |             |
| C            | 3.18465200  | -2.31548200 | -0.55155200 | C              | 4.55728300  | -0.46757600 | -0.15750500 |
| C            | 2.07435000  | -1.64705000 | -0.03699800 | C              | 4.39898900  | -1.76637800 | -0.63959300 |
| C            | 2.22054300  | -0.33619500 | 0.44688300  | C              | 3.14861500  | -2.37682200 | -0.59945200 |

|    |             |             |             |
|----|-------------|-------------|-------------|
| C  | 2.05206500  | -1.69471400 | -0.07472400 |
| C  | 2.23361100  | -0.40560900 | 0.44211000  |
| C  | 3.47595700  | 0.21453700  | 0.40061100  |
| H  | 5.52881300  | 0.01552900  | -0.20151200 |
| H  | 5.24796500  | -2.29695600 | -1.05906900 |
| H  | 3.00036500  | -3.37568300 | -1.00022900 |
| H  | 3.60713300  | 1.21519600  | 0.80205700  |
| C  | 0.67039800  | -2.26791000 | -0.16868500 |
| O  | 0.47477500  | -3.48323900 | -0.32946400 |
| N  | -0.24338600 | -1.27865000 | -0.10484700 |
| C  | -1.61971700 | -1.42806800 | -0.20537500 |
| C  | -2.34602200 | -0.19253100 | -0.10477600 |
| C  | -2.34566200 | -2.59200800 | -0.38902900 |
| C  | -3.75601100 | -0.16472900 | -0.19740700 |
| C  | -3.75706500 | -2.55704900 | -0.47547900 |
| H  | -1.82438500 | -3.53601000 | -0.46974500 |
| C  | -2.24660200 | 2.11539000  | 0.18637700  |
| C  | -4.39354800 | 1.09590700  | -0.09399200 |
| C  | -4.45931900 | -1.38254800 | -0.38574400 |
| H  | -4.28843500 | -3.49317400 | -0.61874000 |
| C  | -3.64474700 | 2.23104200  | 0.09113000  |
| H  | -1.61863500 | 2.98623800  | 0.34693900  |
| H  | -5.47632600 | 1.14884400  | -0.16245800 |
| H  | -5.54238700 | -1.36392600 | -0.45583900 |
| H  | -4.10493900 | 3.20865200  | 0.17316100  |
| N  | -1.62490900 | 0.95484200  | 0.09026300  |
| Co | 0.38716700  | 0.58114400  | 0.29011200  |
| C  | 0.10800600  | 0.47192400  | 2.39645900  |
| C  | 1.41785400  | -0.00294300 | 2.33683300  |
| C  | 1.23927500  | 2.67342100  | -0.78958400 |
| O  | 0.91738300  | 2.76849100  | 0.42663000  |
| O  | 1.13645100  | 1.54462900  | -1.37460300 |
| C  | 1.77863500  | 3.84855100  | -1.55138600 |
| H  | 2.86871300  | 3.75527700  | -1.60209000 |
| H  | 1.39413700  | 3.84618300  | -2.57358000 |
| H  | 1.52715300  | 4.78518700  | -1.05231400 |
| H  | -0.09076000 | 1.52069400  | 2.59707300  |
| H  | 2.22130900  | 0.68198300  | 2.58422300  |
| H  | 1.59458400  | -1.05097300 | 2.55165300  |
| H  | -0.72059200 | -0.22165500 | 2.50428300  |

1

|   |             |             |             |
|---|-------------|-------------|-------------|
| C | -5.11503300 | 1.15067000  | -0.00037100 |
| C | -3.94722700 | 1.79153600  | 0.41550100  |
| C | -2.73539300 | 1.10311100  | 0.42362900  |
| C | -2.68323700 | -0.23742600 | 0.01534600  |
| C | -3.86281500 | -0.87857600 | -0.38411000 |
| C | -5.07056200 | -0.18721700 | -0.39841600 |
| H | -6.05723500 | 1.69020100  | -0.00792200 |
| H | -3.97971700 | 2.82654600  | 0.74120400  |
| H | -1.84435800 | 1.61168600  | 0.77934200  |
| H | -3.80860000 | -1.92019800 | -0.67978600 |
| H | -5.97771700 | -0.69082900 | -0.71795300 |
| C | -1.42262400 | -1.05072500 | 0.00560700  |
| O | -1.44868800 | -2.28027200 | 0.00458400  |
| N | -0.26407900 | -0.31822700 | -0.01417900 |
| H | -0.31609700 | 0.69064400  | -0.10931900 |
| C | 1.05363500  | -0.76985500 | 0.01547900  |
| C | 2.04474000  | 0.26828000  | -0.03247700 |
| C | 1.45422000  | -2.09301200 | 0.09103600  |
| C | 3.42787500  | -0.07709000 | -0.00283600 |
| C | 2.83095000  | -2.41346500 | 0.12120700  |
| H | 0.70456400  | -2.86976400 | 0.12299700  |
| C | 2.50655200  | 2.52096800  | -0.15162900 |
| C | 4.35605900  | 0.99276400  | -0.05440900 |
| C | 3.80467800  | -1.44210000 | 0.07546500  |
| H | 3.11454100  | -3.45978100 | 0.18068200  |
| C | 3.90101600  | 2.28878900  | -0.12870500 |
| H | 2.12601600  | 3.53869100  | -0.20992500 |
| H | 5.41977700  | 0.77299700  | -0.03457400 |
| H | 4.85868500  | -1.70132400 | 0.09773800  |
| H | 4.58790700  | 3.12724400  | -0.16935000 |
| N | 1.60797100  | 1.55551100  | -0.10524700 |

2

|   |             |             |            |
|---|-------------|-------------|------------|
| C | -3.82720300 | -2.83382100 | 3.61966700 |
| C | -2.78849300 | -3.65269300 | 3.76559800 |
| C | -2.15485400 | -4.94341600 | 3.47406800 |
| C | -1.46207700 | -3.88185800 | 4.34461600 |
| H | -1.75791000 | -5.12257200 | 2.47572300 |
| H | -2.53222300 | -5.83903000 | 3.96583800 |
| H | -1.37780700 | -4.07787800 | 5.41254700 |
| H | -0.60370100 | -3.36119700 | 3.92258600 |
| H | -3.78359500 | -1.86155100 | 4.10999800 |
| C | -5.05097400 | -3.10018400 | 2.85562400 |

|   |             |             |             |
|---|-------------|-------------|-------------|
| C | -6.06075300 | -2.12076500 | 2.80230200  |
| C | -5.27621300 | -4.29930900 | 2.16153000  |
| C | -7.23539900 | -2.32512100 | 2.09362600  |
| H | -5.91531200 | -1.18175800 | 3.32974100  |
| C | -6.45003700 | -4.52027600 | 1.44529000  |
| H | -4.51967700 | -5.07588800 | 2.18085500  |
| C | -7.44056000 | -3.52964000 | 1.40737400  |
| H | -8.00984600 | -1.56613100 | 2.05647700  |
| H | -6.58374000 | -5.45996800 | 0.92356800  |
| O | -8.62256500 | -3.64234300 | 0.73900000  |
| C | -8.87421700 | -4.84739700 | 0.02840900  |
| H | -9.85912300 | -4.72875500 | -0.42619100 |
| H | -8.13192000 | -5.01423000 | -0.76212400 |
| H | -8.89032700 | -5.71665600 | 0.69766700  |

HOAc

|   |             |             |             |
|---|-------------|-------------|-------------|
| C | -0.09030500 | 0.12322700  | -0.00019400 |
| O | -0.64170300 | 1.20280700  | -0.00008300 |
| O | -0.77830300 | -1.04285900 | 0.00004900  |
| H | -1.72166500 | -0.80310600 | 0.00009300  |
| C | 1.39467700  | -0.11156900 | 0.00002900  |
| H | 1.68022400  | -0.69305600 | 0.88193000  |
| H | 1.68046900  | -0.69298900 | -0.88183500 |
| H | 1.91745200  | 0.84414600  | 0.00013900  |

CoOAc3\_Q

|    |             |             |             |
|----|-------------|-------------|-------------|
| Co | -0.10976800 | -0.03788900 | 0.02928600  |
| C  | -2.49528400 | -0.06882000 | 0.01033400  |
| O  | -1.81646100 | -0.51152200 | -0.98070500 |
| O  | -1.84044600 | 0.38345400  | 1.01436200  |
| C  | 1.20769100  | 2.00143800  | 0.07211300  |
| O  | 1.37974700  | 1.18946600  | 1.01895800  |
| O  | 0.33036500  | 1.67685200  | -0.82728300 |
| C  | 1.37962400  | -1.95902500 | -0.07178100 |
| O  | 1.48922900  | -1.12842500 | -1.00712300 |
| O  | 0.47740600  | -1.71060100 | 0.83394300  |
| C  | -3.98903100 | -0.04519300 | -0.01719300 |
| H  | -4.38974900 | -0.13789600 | 0.99360400  |
| H  | -4.30924500 | 0.91973800  | -0.42734500 |
| H  | -4.37115300 | -0.83744600 | -0.66272100 |
| C  | 1.96117800  | 3.28432600  | -0.06027600 |
| H  | 2.58081400  | 3.24044500  | -0.96203200 |
| H  | 1.25753400  | 4.11264800  | -0.18330600 |
| H  | 2.59147900  | 3.45037200  | 0.81365800  |

|   |            |             |             |
|---|------------|-------------|-------------|
| C | 2.21925300 | -3.18782200 | 0.05157300  |
| H | 2.78160100 | -3.14403900 | 0.98965900  |
| H | 1.57162800 | -4.06865800 | 0.09649900  |
| H | 2.90548500 | -3.26915000 | -0.79165700 |

CoOAc3\_S

|    |             |             |             |
|----|-------------|-------------|-------------|
| Co | 0.00078400  | 0.00552500  | -0.01827800 |
| C  | 1.49510500  | -1.71917700 | -0.03812600 |
| O  | 0.57526600  | -1.61766900 | 0.84530800  |
| O  | 1.51022500  | -0.78803300 | -0.91484900 |
| C  | 0.74997100  | 2.16167700  | -0.00284900 |
| O  | -0.06855500 | 1.72558400  | -0.88318200 |
| O  | 1.12289900  | 1.29835900  | 0.86479100  |
| C  | -2.23996100 | -0.42940700 | -0.00149900 |
| O  | -1.67774900 | 0.31093200  | 0.87703100  |
| O  | -1.45578700 | -0.89922100 | -0.89641400 |
| C  | 2.49774400  | -2.82210500 | -0.02597700 |
| H  | 2.83639100  | -3.03498200 | -1.04166300 |
| H  | 3.36121900  | -2.50250500 | 0.56828500  |
| H  | 2.07094000  | -3.71483300 | 0.43443400  |
| C  | 1.21332900  | 3.57806500  | 0.03263600  |
| H  | 0.65978900  | 4.10830700  | 0.81584100  |
| H  | 2.27603700  | 3.61523100  | 0.28398700  |
| H  | 1.02806300  | 4.06372000  | -0.92662400 |
| C  | -3.69465500 | -0.75272600 | 0.03457000  |
| H  | -4.08129100 | -0.85420200 | -0.98154600 |
| H  | -3.82687200 | -1.71072100 | 0.55045000  |
| H  | -4.24124100 | 0.01755000  | 0.58102800  |

CoOAc3\_T

|    |             |             |             |
|----|-------------|-------------|-------------|
| Co | -0.06739700 | -0.01366900 | 0.00105500  |
| C  | 1.26941600  | -1.99559100 | 0.05634700  |
| O  | 0.44795600  | -1.89304000 | 0.99920900  |
| O  | 1.31355200  | -1.03342300 | -0.81593000 |
| C  | 1.07324400  | 2.08677700  | -0.07444800 |
| O  | 0.24942000  | 1.90629100  | -1.00361300 |
| O  | 1.22412700  | 1.13325500  | 0.79519600  |
| C  | -2.37280700 | -0.11770600 | 0.01602000  |
| O  | -1.71128400 | 0.68889100  | 0.76021300  |
| O  | -1.65108500 | -0.86791100 | -0.73098700 |
| C  | 2.20667300  | -3.15263200 | -0.10723600 |
| H  | 2.12463300  | -3.55423500 | -1.12103300 |
| H  | 3.23500500  | -2.80292100 | 0.02926500  |
| H  | 1.98209800  | -3.92781000 | 0.62574200  |

|   |             |             |             |
|---|-------------|-------------|-------------|
| C | 1.89901900  | 3.32782300  | 0.07423300  |
| H | 1.81886500  | 3.70643400  | 1.09688300  |
| H | 2.95022300  | 3.08179400  | -0.10795200 |
| H | 1.57241500  | 4.08664400  | -0.63719800 |
| C | -3.85903600 | -0.15394900 | -0.00384300 |
| H | -4.21400700 | 0.57287400  | -0.74358600 |
| H | -4.20948700 | -1.14615100 | -0.29372300 |
| H | -4.25490800 | 0.12694100  | 0.97409400  |

2s\_Q

|    |             |             |             |
|----|-------------|-------------|-------------|
| C  | -4.24304900 | -0.73284000 | -1.21785600 |
| C  | -5.06990200 | -1.57176200 | -0.47004700 |
| C  | -4.50805700 | -2.52114100 | 0.38824300  |
| C  | -3.12579300 | -2.62439800 | 0.49809200  |
| C  | -2.28963900 | -1.78113400 | -0.24905600 |
| C  | -2.85679200 | -0.83330700 | -1.11219200 |
| H  | -4.67473300 | 0.00729500  | -1.88427200 |
| H  | -6.14936600 | -1.48707300 | -0.55487700 |
| H  | -5.14812200 | -3.17679400 | 0.97080400  |
| H  | -2.66900100 | -3.35151000 | 1.15951100  |
| H  | -2.23892100 | -0.16835000 | -1.70298500 |
| C  | -0.82282200 | -1.94567200 | -0.05033200 |
| N  | 0.02843300  | -1.08128000 | -0.78547100 |
| H  | -0.31916700 | -0.72439100 | -1.69890800 |
| O  | -0.34945600 | -2.76064200 | 0.72693300  |
| C  | 1.41491700  | -1.46593900 | -0.83999600 |
| C  | 2.36651000  | -0.71867500 | -0.09951600 |
| C  | 1.83000200  | -2.55401500 | -1.57576400 |
| C  | 3.73348500  | -1.12302000 | -0.09057400 |
| C  | 3.18863500  | -2.94401700 | -1.59006000 |
| H  | 1.09534100  | -3.12356000 | -2.13538500 |
| C  | 2.82063200  | 1.08335700  | 1.31251800  |
| C  | 4.63620300  | -0.35707200 | 0.68904400  |
| C  | 4.12319300  | -2.25204700 | -0.85364300 |
| H  | 3.48520700  | -3.80611900 | -2.17820100 |
| C  | 4.18336600  | 0.73322500  | 1.39609400  |
| H  | 2.41989800  | 1.94061800  | 1.84039200  |
| H  | 5.68320100  | -0.64440200 | 0.71836000  |
| H  | 5.16504200  | -2.55703400 | -0.84662500 |
| H  | 4.84999600  | 1.33269000  | 2.00479900  |
| N  | 1.95948200  | 0.38801800  | 0.58874700  |
| Co | 0.03807500  | 1.04588400  | 0.20829000  |
| O  | -0.48010600 | 0.36830800  | -3.04950500 |
| O  | 0.64478600  | 1.59946200  | -1.54054500 |

|      |             |             |             |      |             |             |             |
|------|-------------|-------------|-------------|------|-------------|-------------|-------------|
| C    | 0.14808900  | 1.38881300  | -2.72648300 | C    | -4.00768900 | -2.40476000 | 0.49664100  |
| O    | -1.71879600 | 2.20677000  | -0.19850400 | H    | -3.30162200 | -4.15098100 | 1.50817500  |
| O    | 0.02248200  | 2.95202800  | 0.91094800  | C    | -4.13772100 | 0.96292300  | -1.14624000 |
| C    | -1.15454800 | 3.14690900  | 0.43586800  | H    | -2.37766300 | 2.24494600  | -1.38783900 |
| O    | -0.77781300 | 0.22371600  | 1.64357500  | H    | -5.62985100 | -0.52583500 | -0.74125200 |
| O    | 0.64328300  | 0.50673100  | 3.37206800  | H    | -5.03913900 | -2.74004900 | 0.45181900  |
| C    | -0.33611000 | -0.02555900 | 2.87588400  | H    | -4.81449400 | 1.66564400  | -1.61779900 |
| C    | -1.18016600 | -1.05957500 | 3.58582400  | N    | -1.90877100 | 0.48438200  | -0.46106000 |
| H    | -1.03689700 | -2.02268300 | 3.08555000  | Co   | -0.09526000 | 0.90357800  | -0.03749000 |
| H    | -0.88534100 | -1.13695400 | 4.63315100  | O    | 0.34033200  | -0.01271300 | 3.00406900  |
| H    | -2.24032800 | -0.80359400 | 3.50574800  | O    | -0.72944800 | 1.48324400  | 1.68619000  |
| C    | -1.83947100 | 4.46282500  | 0.66586100  | C    | -0.32933800 | 1.02825400  | 2.82516000  |
| H    | -1.13452200 | 5.28461800  | 0.51814900  | O    | 1.64423200  | 1.69220300  | 0.39447800  |
| H    | -2.69870700 | 4.57211700  | 0.00304200  | O    | 0.00926100  | 2.75786500  | -0.53247000 |
| H    | -2.18301000 | 4.50146100  | 1.70546900  | C    | 1.21193300  | 2.78413300  | -0.09988100 |
| C    | 0.39720300  | 2.50167900  | -3.71725900 | O    | 0.63085600  | 0.34896000  | -1.66474300 |
| H    | -0.18706800 | 3.37747300  | -3.41412600 | O    | -0.86572400 | 1.20440400  | -3.14069400 |
| H    | 1.45134900  | 2.79182000  | -3.70212500 | C    | 0.12241300  | 0.53390800  | -2.85940700 |
| H    | 0.10133600  | 2.19754500  | -4.72189400 | C    | 0.91352000  | -0.22328500 | -3.91670200 |
| 2s_S |             |             |             | H    | 0.76321900  | -1.29802400 | -3.76968600 |
| C    | 4.28646000  | -0.79632500 | 1.31953800  | H    | 0.57707300  | 0.05904200  | -4.91561700 |
| C    | 5.15906700  | -1.34145100 | 0.37799400  | H    | 1.98398400  | -0.02682500 | -3.80908300 |
| C    | 4.65269000  | -2.02632900 | -0.73120800 | C    | 2.06312900  | 4.00561000  | -0.20830900 |
| C    | 3.27954900  | -2.16446600 | -0.89136400 | H    | 1.44372700  | 4.90430600  | -0.19451200 |
| C    | 2.39683900  | -1.60872800 | 0.04875400  | H    | 2.79443000  | 4.02913000  | 0.60196400  |
| C    | 2.90729900  | -0.92115000 | 1.15815600  | H    | 2.60315100  | 3.96979900  | -1.16117000 |
| H    | 4.67681900  | -0.26560200 | 2.18231700  | C    | -0.72701000 | 1.88002200  | 4.01266800  |
| H    | 6.23232300  | -1.23469300 | 0.50633300  | H    | -0.07377800 | 2.75917900  | 4.04793000  |
| H    | 5.32956400  | -2.45052100 | -1.46650100 | H    | -1.75373100 | 2.23716500  | 3.90259300  |
| H    | 2.86525800  | -2.69470000 | -1.74106600 | H    | -0.61561100 | 1.31848800  | 4.94119000  |
| H    | 2.24950200  | -0.47962900 | 1.89644800  | 2s_T |             |             |             |
| C    | 0.94973800  | -1.82111000 | -0.19620800 | C    | -4.27023400 | -0.62658400 | -1.31285500 |
| N    | 0.02119400  | -1.02921100 | 0.59505900  | C    | -5.10528900 | -1.47014500 | -0.57965400 |
| H    | 0.32508900  | -0.80276700 | 1.58511700  | C    | -4.55267400 | -2.44168300 | 0.25962800  |
| O    | 0.51912200  | -2.61801800 | -1.00482300 | C    | -3.17153600 | -2.56394000 | 0.36236800  |
| C    | -1.33051100 | -1.54862500 | 0.60316700  | C    | -2.32713700 | -1.71549400 | -0.36990300 |
| C    | -2.31252400 | -0.72692900 | 0.01644800  | C    | -2.88476800 | -0.74348200 | -1.21191100 |
| C    | -1.68690000 | -2.76475500 | 1.13710700  | H    | -4.69544700 | 0.13061800  | -1.96431200 |
| C    | -3.66850500 | -1.14279300 | -0.05384800 | H    | -6.18393900 | -1.37201300 | -0.66099200 |
| C    | -3.03704700 | -3.18827900 | 1.08366700  | H    | -5.19883600 | -3.10074200 | 0.83151800  |
| H    | -0.93266800 | -3.40228000 | 1.58562600  | H    | -2.72172000 | -3.31151800 | 1.00537600  |
| C    | -2.77392400 | 1.30720100  | -1.02342600 | H    | -2.25979400 | -0.06806900 | -1.78305300 |
| C    | -4.58306500 | -0.24742700 | -0.66384200 | C    | -0.86223600 | -1.91418500 | -0.19043400 |

|        |             |             |             |    |             |             |             |
|--------|-------------|-------------|-------------|----|-------------|-------------|-------------|
| N      | 0.00143400  | -1.02832700 | -0.87397200 | C  | -5.10057800 | -1.26310800 | -0.53747100 |
| H      | -0.34426700 | -0.55164200 | -1.72934500 | C  | -4.53852500 | -2.30373100 | 0.20784900  |
| O      | -0.39939300 | -2.78415500 | 0.53371700  | C  | -3.15963400 | -2.48084900 | 0.22152700  |
| C      | 1.38141200  | -1.41724700 | -0.94723400 | C  | -2.32112400 | -1.61466600 | -0.49781900 |
| C      | 2.32409600  | -0.69325700 | -0.17625600 | C  | -2.89127100 | -0.57641600 | -1.24490200 |
| C      | 1.80590500  | -2.47716800 | -1.71716200 | H  | -4.70586800 | 0.40080900  | -1.84930200 |
| C      | 3.69599000  | -1.07846400 | -0.17798400 | H  | -6.17759100 | -1.12306500 | -0.55115800 |
| C      | 3.16809600  | -2.85523600 | -1.73785600 | H  | -5.17652000 | -2.97519100 | 0.77472600  |
| H      | 1.07753200  | -3.03198600 | -2.29903900 | H  | -2.70492300 | -3.28764400 | 0.78440100  |
| C      | 2.75630000  | 1.07333800  | 1.29325800  | H  | -2.27339300 | 0.10122000  | -1.81665400 |
| C      | 4.58993000  | -0.32332300 | 0.62079100  | C  | -0.85256000 | -1.88519200 | -0.42372400 |
| C      | 4.09518400  | -2.17858300 | -0.97790400 | N  | 0.01819000  | -0.86314400 | -0.85526400 |
| H      | 3.47451800  | -3.69494200 | -2.35266300 | H  | -0.24327700 | -0.14780100 | -1.94930400 |
| C      | 4.12403700  | 0.74250100  | 1.35545600  | O  | -0.43484400 | -2.94765900 | 0.02748700  |
| H      | 2.34679400  | 1.90951700  | 1.84578100  | C  | 1.39148200  | -1.25470400 | -0.95897800 |
| H      | 5.64080200  | -0.59631800 | 0.64060200  | C  | 2.36615300  | -0.51591500 | -0.23741400 |
| H      | 5.13992300  | -2.47323400 | -0.98046600 | C  | 1.81801400  | -2.28838300 | -1.77169500 |
| H      | 4.78259100  | 1.33708700  | 1.97719600  | C  | 3.75065000  | -0.84132000 | -0.33587900 |
| N      | 1.90600400  | 0.38060800  | 0.55531100  | C  | 3.18814000  | -2.61456500 | -1.87726800 |
| Co     | 0.08909600  | 1.02155300  | 0.27049800  | H  | 1.08402500  | -2.86156800 | -2.32644800 |
| O      | -0.47178700 | 0.73346700  | -2.90924900 | C  | 2.80522100  | 1.21891700  | 1.26458600  |
| O      | 0.72034700  | 1.81134500  | -1.32278900 | C  | 4.65583400  | -0.06197600 | 0.42729200  |
| C      | 0.23078300  | 1.67920200  | -2.52212200 | C  | 4.14339300  | -1.91206400 | -1.17525400 |
| O      | -1.61629900 | 1.91767800  | -0.02545300 | H  | 3.48341800  | -3.43538400 | -2.52303200 |
| O      | -0.12980100 | 2.98121700  | 1.17884500  | C  | 4.18961200  | 0.95917300  | 1.22509800  |
| C      | -1.28254800 | 2.94869300  | 0.66829400  | H  | 2.39007400  | 2.01215800  | 1.87569900  |
| O      | -0.67360600 | 0.20325400  | 1.72137500  | H  | 5.71777900  | -0.28447200 | 0.37466700  |
| O      | 0.95944000  | 0.03347400  | 3.28231600  | H  | 5.19600300  | -2.16573300 | -1.25295300 |
| C      | -0.12443400 | -0.29069800 | 2.82222100  | H  | 4.86182800  | 1.56468700  | 1.82166500  |
| C      | -1.02376400 | -1.32138700 | 3.47720800  | N  | 1.94317800  | 0.51034400  | 0.55657500  |
| H      | -0.96185000 | -2.24450400 | 2.89231000  | Co | -0.06987600 | 0.86505600  | 0.45940900  |
| H      | -0.69098400 | -1.51088500 | 4.49888900  | O  | -0.28012800 | 0.58105400  | -2.85851400 |
| H      | -2.06539900 | -0.99150800 | 3.46840200  | O  | 0.47895300  | 1.98128700  | -1.27553000 |
| C      | -2.28367400 | 4.04881400  | 0.86925700  | C  | 0.16856600  | 1.72240700  | -2.46558600 |
| H      | -1.77947200 | 4.97727400  | 1.14125700  | O  | -1.84191300 | 1.92083900  | 0.18779700  |
| H      | -2.88465800 | 4.18814500  | -0.03198600 | O  | -0.16695400 | 2.74999000  | 1.32834300  |
| H      | -2.95727700 | 3.76145800  | 1.68419300  | C  | -1.35574200 | 2.87226400  | 0.88430600  |
| C      | 0.60610400  | 2.80732100  | -3.45778400 | O  | -0.59079600 | -0.13417400 | 1.89002600  |
| H      | 0.03532700  | 3.69943800  | -3.17722700 | O  | 1.07344100  | -0.29328700 | 3.39661800  |
| H      | 1.66656900  | 3.05172700  | -3.35670500 | C  | 0.06151900  | -0.74195300 | 2.89104000  |
| H      | 0.37345800  | 2.54000800  | -4.48917900 | C  | -0.59994900 | -2.03302200 | 3.30792600  |
|        |             |             |             | H  | -0.50781000 | -2.75062400 | 2.48619500  |
| TS1s_Q |             |             |             | H  | -0.12449800 | -2.42899000 | 4.20616200  |
| C      | -4.27517200 | -0.40693400 | -1.26556600 | H  | -1.66720800 | -1.86966900 | 3.48268500  |

|        |             |             |             |        |             |             |             |
|--------|-------------|-------------|-------------|--------|-------------|-------------|-------------|
| C      | -2.17501200 | 4.08758500  | 1.20324900  | C      | -0.18633200 | 0.00990000  | 2.99896600  |
| H      | -1.53130300 | 4.95853500  | 1.33927800  | O      | 1.84581800  | 1.29756800  | 0.64873900  |
| H      | -2.91017100 | 4.27035700  | 0.41749900  | O      | 0.26282700  | 2.72857400  | 0.29805900  |
| H      | -2.71211100 | 3.90709000  | 2.14143600  | C      | 1.49606200  | 2.51946800  | 0.55870100  |
| C      | 0.29120900  | 2.79659000  | -3.51076000 | O      | 0.46888500  | 0.73991700  | -1.57304700 |
| H      | 0.98698000  | 3.57016200  | -3.18421800 | O      | -1.01256400 | 2.21795500  | -2.45877400 |
| H      | 0.60454400  | 2.36990800  | -4.46566700 | C      | -0.09816500 | 1.40701500  | -2.55208800 |
| H      | -0.69632300 | 3.25107900  | -3.65204400 | C      | 0.52203200  | 1.03657800  | -3.89276600 |
| TS1s_S |             |             |             | H      | 0.28010300  | -0.00523000 | -4.12724800 |
| C      | 4.23917300  | -1.34021400 | 0.99602300  | H      | 0.13357600  | 1.68700300  | -4.67802300 |
| C      | 5.07355400  | -1.29468300 | -0.12042000 | H      | 1.61188800  | 1.11515300  | -3.84386500 |
| C      | 4.52658300  | -1.40124400 | -1.40258300 | C      | 2.47245800  | 3.64035700  | 0.70377900  |
| C      | 3.15409000  | -1.56001200 | -1.56096300 | H      | 1.97820700  | 4.52687700  | 1.10595200  |
| C      | 2.30805200  | -1.58387800 | -0.44292600 | H      | 3.30443200  | 3.33878100  | 1.34280400  |
| C      | 2.86003300  | -1.47325500 | 0.83773300  | H      | 2.86812000  | 3.88596600  | -0.28822700 |
| H      | 4.65996100  | -1.26620700 | 1.99446000  | C      | -0.30916500 | 0.32837800  | 4.45983200  |
| H      | 6.14628900  | -1.17974900 | 0.00588700  | H      | -0.77365000 | 1.30364400  | 4.60325100  |
| H      | 5.17205500  | -1.36693200 | -2.27527800 | H      | -0.88396000 | -0.45106000 | 4.96594400  |
| H      | 2.71358400  | -1.65961000 | -2.54633000 | H      | 0.69482600  | 0.33741600  | 4.89836300  |
| H      | 2.22778300  | -1.49692500 | 1.71584800  | TS1s_T |             |             |             |
| C      | 0.85418200  | -1.80079600 | -0.70113300 | C      | 4.11292600  | -1.14008500 | 1.15220300  |
| N      | -0.06569300 | -1.20080500 | 0.20381000  | C      | 4.97411600  | -1.62585800 | 0.16936000  |
| H      | 0.14551500  | -1.28701100 | 1.58123100  | C      | 4.45077200  | -2.21476300 | -0.98608700 |
| O      | 0.48585800  | -2.47805500 | -1.64920700 | C      | 3.07448800  | -2.31276100 | -1.15166300 |
| C      | -1.42530000 | -1.60303300 | 0.01004900  | C      | 2.20120200  | -1.81376000 | -0.17217500 |
| C      | -2.37102600 | -0.56076200 | -0.10834000 | C      | 2.73137900  | -1.22857100 | 0.98391800  |
| C      | -1.87825000 | -2.90819900 | -0.00926800 | H      | 4.51278300  | -0.68360700 | 2.05222100  |
| C      | -3.76180900 | -0.81913200 | -0.24751300 | H      | 6.04941000  | -1.54842600 | 0.30152900  |
| C      | -3.25891500 | -3.18204600 | -0.14960200 | H      | 5.11733700  | -2.59564300 | -1.75406300 |
| H      | -1.17130200 | -3.72485400 | 0.07295400  | H      | 2.64821700  | -2.76978200 | -2.03729200 |
| C      | -2.69138900 | 1.75149100  | -0.18897200 | H      | 2.08695700  | -0.84106900 | 1.75979200  |
| C      | -4.61507500 | 0.30777000  | -0.35563000 | C      | 0.74177100  | -1.96681500 | -0.43896000 |
| C      | -4.18878300 | -2.16993300 | -0.26724300 | N      | -0.15347900 | -1.18402900 | 0.35224100  |
| H      | -3.58509600 | -4.21716400 | -0.16474300 | H      | 0.03717700  | -1.09587800 | 1.68262300  |
| C      | -4.08505900 | 1.57893500  | -0.32516900 | O      | 0.33040300  | -2.73527900 | -1.29429100 |
| H      | -2.22514200 | 2.72737300  | -0.17845500 | C      | -1.53850200 | -1.53810200 | 0.19019300  |
| H      | -5.68500100 | 0.15519600  | -0.46354200 | C      | -2.44832100 | -0.53977700 | -0.24481500 |
| H      | -5.24578800 | -2.39148900 | -0.37585900 | C      | -2.02371700 | -2.79795700 | 0.47951400  |
| H      | -4.71624400 | 2.45568600  | -0.41052300 | C      | -3.83212000 | -0.83461500 | -0.40855700 |
| N      | -1.88380200 | 0.71253900  | -0.08262800 | C      | -3.39788800 | -3.09445100 | 0.33069100  |
| Co     | -0.00926100 | 0.81059500  | 0.21722600  | H      | -1.33901900 | -3.57007700 | 0.81150400  |
| O      | 0.13789000  | -1.20177700 | 2.69737100  | C      | -2.73960000 | 1.66200500  | -0.94757000 |
| O      | -0.38563600 | 0.91440700  | 2.15051000  | C      | -4.66237500 | 0.21790200  | -0.87160500 |

|      |             |             |             |      |             |             |             |
|------|-------------|-------------|-------------|------|-------------|-------------|-------------|
| C    | -4.29065000 | -2.14089200 | -0.10836800 | N    | 0.16072100  | -1.00243400 | 0.22164400  |
| H    | -3.74479600 | -4.09618200 | 0.56328500  | O    | 1.45785500  | -2.20101900 | 1.68508600  |
| C    | -4.12182500 | 1.45438900  | -1.14695000 | C    | -0.91942500 | -1.78540000 | 0.09706600  |
| H    | -2.26200600 | 2.61195600  | -1.15688200 | C    | -2.18231100 | -1.10739900 | -0.14062800 |
| H    | -5.72369000 | 0.03206400  | -1.01004100 | C    | -0.92655400 | -3.20254500 | 0.14550200  |
| H    | -5.34378900 | -2.37475600 | -0.23006500 | C    | -3.37773600 | -1.84844700 | -0.31270300 |
| H    | -4.73561900 | 2.27055600  | -1.51052400 | C    | -2.11431300 | -3.91653300 | -0.02798500 |
| N    | -1.95123700 | 0.70180800  | -0.50395600 | H    | 0.00182200  | -3.72848300 | 0.32708000  |
| Co   | 0.04674700  | 0.82127900  | 0.08605000  | C    | -3.29003100 | 0.91197300  | -0.39410600 |
| O    | -0.00775800 | -0.85032700 | 2.81200000  | C    | -4.56745500 | -1.11717200 | -0.53953700 |
| O    | -0.65195100 | 1.11594300  | 1.93867900  | C    | -3.32225400 | -3.26970400 | -0.25323800 |
| C    | -0.45862100 | 0.34731600  | 2.92087300  | H    | -2.08693400 | -5.00034900 | 0.01299200  |
| O    | 1.89257000  | 1.73577300  | 1.06031300  | C    | -4.52287100 | 0.26192500  | -0.58212900 |
| O    | 0.29478600  | 2.74317900  | -0.05849700 | H    | -3.19955700 | 1.99330400  | -0.41324700 |
| C    | 1.40634800  | 2.79511500  | 0.59479000  | H    | -5.50359200 | -1.65042400 | -0.67547600 |
| O    | 0.87960900  | 0.53488300  | -1.51869400 | H    | -4.23622600 | -3.83896100 | -0.39002500 |
| O    | -0.32867900 | 1.91973800  | -2.85031800 | H    | -5.41746300 | 0.84974500  | -0.75326400 |
| C    | 0.62087800  | 1.18175100  | -2.64896100 | N    | -2.16180500 | 0.24258400  | -0.18375300 |
| C    | 1.65851300  | 0.85062200  | -3.70726000 | Co   | -0.23340400 | 1.05985500  | 0.18413300  |
| H    | 1.66809100  | -0.22830400 | -3.88900600 | O    | 1.47929500  | 1.73275500  | 1.21101000  |
| H    | 1.43014800  | 1.38146200  | -4.63244100 | O    | -0.30573600 | 1.07086200  | 2.31680900  |
| H    | 2.65457100  | 1.12924500  | -3.34987300 | C    | 0.88840000  | 1.51146700  | 2.31667100  |
| C    | 2.07713700  | 4.13275800  | 0.74153100  | O    | 0.01034600  | 1.63876300  | -1.81650800 |
| H    | 1.34969700  | 4.88676400  | 1.05357800  | O    | -0.88168000 | 3.06537600  | -0.39092900 |
| H    | 2.89306600  | 4.07274900  | 1.46281700  | C    | -0.46928000 | 2.79539100  | -1.55741500 |
| H    | 2.47561500  | 4.43914200  | -0.23146800 | C    | -0.50615200 | 3.84071600  | -2.64498100 |
| C    | -0.73931000 | 0.85717400  | 4.30374600  | H    | -0.67420200 | 3.37858200  | -3.62039800 |
| H    | -1.47383400 | 1.66262200  | 4.27154300  | H    | -1.27467000 | 4.58795300  | -2.43836200 |
| H    | -1.07660300 | 0.04619700  | 4.95142500  | H    | 0.46554200  | 4.34685500  | -2.67505800 |
| H    | 0.19568000  | 1.25693700  | 4.71337300  | C    | 1.62058500  | 1.71722600  | 3.61798400  |
| 3s_Q |             |             |             | H    | 2.34873500  | 2.52569300  | 3.52606800  |
| C    | 3.63647200  | -0.16480500 | -2.07851200 | H    | 0.91892700  | 1.92509200  | 4.42806500  |
| C    | 4.88803500  | -0.56298800 | -1.60584200 | H    | 2.16234400  | 0.79567300  | 3.86043100  |
| C    | 4.99363800  | -1.26698000 | -0.40178700 | 3s_S |             |             |             |
| C    | 3.84927700  | -1.56921400 | 0.32701300  | C    | 3.77228400  | 0.05496800  | -1.93572900 |
| C    | 2.58984100  | -1.16538000 | -0.14213000 | C    | 4.92560700  | -0.32607300 | -1.24797700 |
| C    | 2.48590600  | -0.46401900 | -1.35180500 | C    | 4.83052600  | -1.19530200 | -0.15719800 |
| H    | 3.55370700  | 0.38639500  | -3.00992300 | C    | 3.58671100  | -1.67595600 | 0.24222700  |
| H    | 5.78287700  | -0.32388900 | -2.17307100 | C    | 2.42385700  | -1.26837900 | -0.42365500 |
| H    | 5.96786000  | -1.57459300 | -0.03442000 | C    | 2.52392100  | -0.41102900 | -1.52447400 |
| H    | 3.90668200  | -2.11232200 | 1.26385600  | H    | 3.84404700  | 0.71495300  | -2.79560400 |
| H    | 1.52069800  | -0.13314500 | -1.71571600 | H    | 5.89646300  | 0.04401200  | -1.56520400 |
| C    | 1.40142200  | -1.52884300 | 0.66380200  | H    | 5.72691800  | -1.50168000 | 0.37435800  |



|      |             |             |             |        |             |             |             |
|------|-------------|-------------|-------------|--------|-------------|-------------|-------------|
| H    | 3.49684900  | -2.36927500 | 1.07207200  | H      | 3.53374400  | 0.17880100  | -3.09449800 |
| H    | 1.62720000  | -0.11075600 | -2.05084900 | H      | 5.71521300  | -0.56120800 | -2.16245100 |
| C    | 1.11537900  | -1.85139000 | 0.01023600  | H      | 5.78839100  | -1.80791700 | -0.01383700 |
| N    | -0.01129900 | -1.06274600 | -0.14549000 | H      | 3.66506700  | -2.31486600 | 1.19248200  |
| O    | 1.08597700  | -3.01099400 | 0.43427300  | H      | 1.43809300  | -0.29641200 | -1.86997700 |
| C    | -1.27617500 | -1.64186000 | -0.19784600 | C      | 1.19190200  | -1.69292000 | 0.49049800  |
| C    | -2.34955100 | -0.70248500 | -0.20811300 | N      | 0.00577600  | -1.00028300 | 0.14464900  |
| C    | -1.61852000 | -2.98949200 | -0.32011100 | O      | 1.18722000  | -2.57096700 | 1.34505400  |
| C    | -3.71062900 | -1.09143500 | -0.35631200 | C      | -1.19621100 | -1.70151200 | 0.06338900  |
| C    | -2.96695600 | -3.37676000 | -0.47626500 | C      | -2.33205200 | -0.86707400 | -0.12598300 |
| H    | -0.84246100 | -3.73829100 | -0.29001200 | C      | -1.39834300 | -3.07777200 | 0.07253600  |
| C    | -2.92649400 | 1.55950300  | -0.03953700 | C      | -3.63774200 | -1.38719400 | -0.30931400 |
| C    | -4.67964000 | -0.05883400 | -0.34396800 | C      | -2.69734200 | -3.60351100 | -0.11322800 |
| C    | -4.00538600 | -2.46848200 | -0.49753200 | H      | -0.56532400 | -3.74810600 | 0.23337900  |
| H    | -3.18297900 | -4.43658400 | -0.57625800 | C      | -3.07540200 | 1.33949200  | -0.26275700 |
| C    | -4.29243000 | 1.25440900  | -0.18713100 | C      | -4.68145400 | -0.44526700 | -0.47527400 |
| H    | -2.57643400 | 2.57384300  | 0.10475100  | C      | -3.80119200 | -2.79699700 | -0.30114600 |
| H    | -5.72886700 | -0.31717700 | -0.45441800 | H      | -2.81969200 | -4.68213400 | -0.10094900 |
| H    | -5.03642700 | -2.78737600 | -0.60938700 | C      | -4.40152100 | 0.90607900  | -0.44993700 |
| H    | -5.01769300 | 2.05969100  | -0.16787400 | H      | -2.80665700 | 2.38861800  | -0.22827100 |
| N    | -2.00267000 | 0.60865500  | -0.05796200 | H      | -5.69904900 | -0.79723000 | -0.61714700 |
| Co   | -0.13402200 | 0.82598700  | 0.27164700  | H      | -4.79119900 | -3.22095500 | -0.43277900 |
| O    | 1.62628100  | 0.97679600  | 1.10671300  | H      | -5.18513000 | 1.64543300  | -0.56852800 |
| O    | -0.18482700 | 0.45438400  | 2.15882500  | N      | -2.08174900 | 0.47373600  | -0.11167200 |
| C    | 1.07682500  | 0.67099300  | 2.21512600  | Co     | -0.20240800 | 0.84861200  | 0.24191300  |
| O    | 0.19427400  | 1.65334600  | -1.46396400 | O      | 1.57924600  | 1.16873100  | 0.94452400  |
| O    | -0.25063000 | 2.79757600  | 0.31767500  | O      | -0.02094400 | 1.11223200  | 2.44383400  |
| C    | 0.07154000  | 2.80156100  | -0.91912900 | C      | 1.19988300  | 1.25743400  | 2.17569500  |
| C    | 0.32619200  | 4.06557400  | -1.67184000 | O      | 0.19413900  | 1.76888700  | -1.80408700 |
| H    | 0.12328700  | 3.92376600  | -2.73488200 | O      | -0.48033800 | 2.78287200  | 0.02196600  |
| H    | -0.28082900 | 4.87778200  | -1.26725200 | C      | -0.10482900 | 2.83502200  | -1.21247600 |
| H    | 1.38242300  | 4.33262700  | -1.55263200 | C      | -0.01642400 | 4.17980000  | -1.87922500 |
| C    | 1.85617700  | 0.52211000  | 3.47742600  | H      | 0.00305200  | 4.06790400  | -2.96425800 |
| H    | 2.66777500  | 1.25202300  | 3.50594800  | H      | -0.85169300 | 4.81520100  | -1.57484000 |
| H    | 1.20568800  | 0.63256300  | 4.34640600  | H      | 0.90940300  | 4.66940000  | -1.55756500 |
| H    | 2.29760000  | -0.48094800 | 3.49154400  | C      | 2.24272400  | 1.51482500  | 3.22493400  |
|      |             |             |             | H      | 2.74689100  | 2.46294100  | 3.01443200  |
| 3s_T |             |             |             | H      | 1.79021100  | 1.54698600  | 4.21640400  |
| C    | 3.56904700  | -0.36325700 | -2.15441600 | H      | 2.99735500  | 0.72339100  | 3.18358200  |
| C    | 4.79392400  | -0.78016100 | -1.63023200 |        |             |             |             |
| C    | 4.83612600  | -1.48204800 | -0.42151400 | TS2s_Q |             |             |             |
| C    | 3.65596100  | -1.76429900 | 0.25810900  | C      | -4.47379200 | 0.69373700  | -1.02137300 |
| C    | 2.42506900  | -1.33290400 | -0.25713100 | C      | -4.16906700 | 2.03088600  | -1.30635400 |
| C    | 2.38550400  | -0.63564600 | -1.47133900 | C      | -2.93808400 | 2.55498300  | -0.92717300 |

|    |             |             |             |    |             |             |             |
|----|-------------|-------------|-------------|----|-------------|-------------|-------------|
| C  | -2.01011000 | 1.73684800  | -0.26624100 | C  | 4.51062700  | -0.06169200 | -0.61336100 |
| C  | -2.30244700 | 0.39030400  | 0.06881500  | C  | 4.38412400  | -1.32590400 | -1.20240700 |
| C  | -3.55294700 | -0.10296000 | -0.34077000 | C  | 3.18795700  | -2.03795600 | -1.10282100 |
| H  | -5.43444800 | 0.28403500  | -1.32281300 | C  | 2.11709400  | -1.47521600 | -0.41317500 |
| H  | -4.88743800 | 2.65387100  | -1.83117400 | C  | 2.22697100  | -0.21064200 | 0.20949600  |
| H  | -2.67030500 | 3.58125100  | -1.15841100 | C  | 3.43963200  | 0.49078100  | 0.08710600  |
| H  | -3.81875800 | -1.12931900 | -0.09610400 | H  | 5.44820600  | 0.48082600  | -0.69477000 |
| C  | -0.65666500 | 2.29769400  | -0.00686800 | H  | 5.22264200  | -1.75304600 | -1.74504700 |
| O  | -0.41851400 | 3.49820000  | 0.08326100  | H  | 3.06567400  | -3.00995400 | -1.56993200 |
| N  | 0.31984400  | 1.28050500  | 0.04836900  | H  | 3.54877600  | 1.45733700  | 0.57161900  |
| C  | 1.65596600  | 1.49630500  | -0.01927800 | C  | 0.77474000  | -2.13388200 | -0.40434500 |
| C  | 2.44868700  | 0.29278600  | -0.18431400 | O  | 0.58963800  | -3.31825300 | -0.69521200 |
| C  | 2.33562200  | 2.73112800  | 0.04159800  | N  | -0.19438700 | -1.21570200 | -0.09767300 |
| C  | 3.86270400  | 0.35959500  | -0.27069500 | C  | -1.55488800 | -1.41452800 | -0.25272700 |
| C  | 3.73519400  | 2.77777900  | -0.03651600 | C  | -2.30231000 | -0.19854500 | -0.29723500 |
| H  | 1.75621200  | 3.63403200  | 0.16512500  | C  | -2.24724800 | -2.61408700 | -0.38441700 |
| C  | 2.45522700  | -2.00926100 | -0.45550000 | C  | -3.71434200 | -0.18857500 | -0.45352300 |
| C  | 4.56148500  | -0.85713200 | -0.45319100 | C  | -3.65223300 | -2.60200300 | -0.53959600 |
| C  | 4.49575000  | 1.63047700  | -0.18765500 | H  | -1.69645900 | -3.54358600 | -0.37476100 |
| H  | 4.22840600  | 3.74248700  | 0.02527100  | C  | -2.19506900 | 2.13250500  | -0.22893600 |
| C  | 3.85891100  | -2.04133500 | -0.54631800 | C  | -4.34502500 | 1.08021000  | -0.49186200 |
| H  | 1.86088200  | -2.91578000 | -0.51881400 | C  | -4.38480000 | -1.43256200 | -0.57221900 |
| H  | 5.64512300  | -0.84396600 | -0.52272700 | H  | -4.16510100 | -3.55451000 | -0.63672200 |
| H  | 5.57801200  | 1.68603400  | -0.25161800 | C  | -3.59304600 | 2.23030400  | -0.38295200 |
| H  | 4.36622800  | -2.98867900 | -0.68871200 | H  | -1.56466900 | 3.00856900  | -0.12570800 |
| N  | 1.78063200  | -0.88063600 | -0.28310300 | H  | -5.42361500 | 1.13303000  | -0.60915200 |
| Co | -0.32709700 | -0.63394400 | 0.02961500  | H  | -5.46294800 | -1.44742300 | -0.69512200 |
| C  | -1.03560000 | -2.30523100 | -1.63029700 | H  | -4.05469500 | 3.21078700  | -0.40883700 |
| O  | -1.00556000 | -2.56588000 | -0.37856600 | N  | -1.58539800 | 0.95990200  | -0.19431700 |
| O  | -0.63561300 | -1.17788300 | -2.04446800 | Co | 0.30716700  | 0.58914800  | 0.13096400  |
| C  | -0.90491100 | -0.91391600 | 2.86250800  | C  | 1.04880600  | 2.24776400  | -1.31385000 |
| O  | -2.05048200 | -0.41969400 | 2.55668300  | O  | 0.90358900  | 2.47007600  | -0.06381000 |
| O  | 0.04339100  | -1.02166700 | 2.04427100  | O  | 0.74104100  | 1.07659500  | -1.71575100 |
| C  | -1.59145600 | -3.32470500 | -2.59203900 | C  | 0.48907600  | 0.15697000  | 2.91532500  |
| H  | -2.67859400 | -3.19432800 | -2.64472100 | O  | 1.64273400  | -0.32883500 | 2.74514200  |
| H  | -1.18128700 | -3.17772900 | -3.59298300 | O  | -0.22451000 | 0.62580600  | 1.97039400  |
| H  | -1.39049900 | -4.33915200 | -2.24063000 | C  | 1.59509500  | 3.27920600  | -2.24725200 |
| C  | -0.73354900 | -1.40014500 | 4.27705700  | H  | 2.68353700  | 3.15879200  | -2.29431700 |
| H  | -1.22843500 | -2.37313900 | 4.37261600  | H  | 1.19222800  | 3.13665800  | -3.25184700 |
| H  | 0.32399700  | -1.51708900 | 4.51633700  | H  | 1.37303900  | 4.28310300  | -1.88052100 |
| H  | -1.21332300 | -0.71238900 | 4.97691600  | C  | -0.10868700 | 0.16638400  | 4.29747800  |
| H  | -2.04382400 | -0.11584700 | 1.41218700  | H  | -0.75240900 | 1.03790400  | 4.42861700  |
|    |             |             |             | H  | -0.72464300 | -0.73285900 | 4.41005300  |
|    |             |             |             | H  | 0.67621300  | 0.14789600  | 5.05454700  |

TS2s\_S

H 1.84517800 -0.20050900 1.44671200

TS2s\_T

C -4.46884000 0.20845600 -0.60459800

C -4.31874700 1.48919100 -1.15301700

C -3.12119600 2.19104400 -1.00742200

C -2.07308800 1.60096200 -0.30751000

C -2.21250800 0.32377300 0.28214400

C -3.42171900 -0.37262500 0.10543700

H -5.40686300 -0.32449100 -0.72845900

H -5.13953600 1.93557800 -1.70672200

H -2.98132700 3.17108000 -1.45187200

H -3.54301400 -1.35303300 0.55650800

C -0.72023800 2.22917300 -0.26664000

O -0.49803200 3.41488600 -0.49275900

N 0.23816200 1.26325200 -0.01296300

C 1.61248000 1.45887900 -0.16078200

C 2.33485500 0.23820200 -0.28544000

C 2.31970500 2.65160400 -0.20736000

C 3.74333300 0.20952500 -0.44632400

C 3.72711400 2.62568700 -0.36414300

H 1.78934700 3.58956500 -0.12945000

C 2.17357200 -2.08887400 -0.37169300

C 4.34625900 -1.06628700 -0.57323100

C 4.43564500 1.44856700 -0.48017200

H 4.25654700 3.57312800 -0.39416200

C 3.56836700 -2.20492200 -0.53837200

H 1.51896200 -2.95213100 -0.32822000

H 5.42278100 -1.13519600 -0.69979500

H 5.51383600 1.45261100 -0.60352600

H 4.00837900 -3.19091400 -0.63371600

N 1.59120800 -0.90755300 -0.25528400

Co -0.30240200 -0.52214900 0.12549200

C -1.12684500 -2.13646300 -1.58979800

O -0.90264100 -2.33237100 -0.32890900

O -0.89393000 -1.01657700 -2.09322800

C -0.54425800 -0.52384500 3.01859800

O -1.57492200 0.18900000 2.84064700

O 0.14773200 -1.01765500 2.07143700

C -1.69881900 -3.27925100 -2.38635900

H -2.76675300 -3.36637600 -2.15662000

H -1.58233600 -3.09621900 -3.45544200

H -1.22137000 -4.22142800 -2.10583400

C -0.08596100 -0.79820300 4.43174600

H 0.12147400 -1.86490700 4.55141800

H 0.85043000 -0.25851800 4.60889600

H -0.83253700 -0.47325800 5.15693900

H -1.79217800 0.21251800 1.46510300

4\_Q

C -4.49314600 0.66673100 -1.09101100

C -4.32538500 2.05652100 -1.07766400

C -3.08034500 2.59896800 -0.77319700

C -2.01383400 1.74214100 -0.47007200

C -2.15533700 0.33475500 -0.45252600

C -3.41707100 -0.17696600 -0.79509100

H -5.46545500 0.24414600 -1.33262900

H -5.16148000 2.70799100 -1.31489100

H -2.91504800 3.67216100 -0.78188000

H -2.46702500 -0.28082300 1.38562100

H -3.57389700 -1.25433200 -0.80687500

C -0.66887900 2.32267100 -0.21677100

O -0.45237200 3.52771000 -0.10986100

N 0.32008000 1.32297700 -0.12482800

C 1.65681500 1.56467000 -0.13193300

C 2.47430100 0.37077000 -0.07326100

C 2.31422000 2.80767400 -0.20346500

C 3.89097000 0.45402000 -0.07787800

C 3.71727400 2.87373700 -0.20441600

H 1.71794400 3.70731100 -0.24049100

C 2.52346900 -1.94443600 0.01060500

C 4.61282600 -0.76198500 -0.02672700

C 4.50200800 1.73616300 -0.14164400

H 4.19127400 3.84897600 -0.25385300

C 3.93073800 -1.96060500 0.01941600

H 1.94400500 -2.86213100 0.04165200

H 5.69874200 -0.73745100 -0.02753500

H 5.58538200 1.80580400 -0.14375600

H 4.45673000 -2.90778100 0.05784600

N 1.82620700 -0.81780700 -0.03516200

Co -0.32773500 -0.60431000 -0.07167200

C -1.32214500 -0.79106600 2.80295700

O -2.53130100 -0.51924500 2.35067900

O -0.30972100 -0.74996300 2.09758500

C -0.60986600 -2.59494500 -1.51753600

O -0.77177800 -2.61800800 -0.24253400

O -0.22966800 -1.53772300 -2.08734800

C -1.28600600 -1.16335300 4.25411500

|     |             |             |             |     |             |             |             |
|-----|-------------|-------------|-------------|-----|-------------|-------------|-------------|
| H   | -0.25459400 | -1.26841000 | 4.58833000  | O   | -0.79589900 | -2.60229800 | -0.34613100 |
| H   | -1.80491800 | -0.40580600 | 4.84784100  | O   | -0.34944200 | -1.21671200 | -1.95024400 |
| H   | -1.81693000 | -2.11114700 | 4.39196600  | C   | -0.45792200 | -0.07881900 | 4.17821000  |
| C   | -0.91426600 | -3.84227300 | -2.31160300 | H   | 0.25010600  | -0.89231000 | 4.32956000  |
| H   | -2.00138900 | -3.95742500 | -2.38700900 | H   | 0.00426600  | 0.86995100  | 4.47126200  |
| H   | -0.49771800 | -3.77450200 | -3.31782900 | H   | -1.34599700 | -0.22027600 | 4.79970300  |
| H   | -0.52556200 | -4.72558600 | -1.79786400 | C   | -0.92729900 | -3.47415700 | -2.61088000 |
| 4_S |             |             |             | H   | -1.99127500 | -3.45689900 | -2.87367300 |
| C   | -4.54733200 | -0.05134600 | -0.48975700 | H   | -0.34680900 | -3.29210900 | -3.51716400 |
| C   | -4.55302200 | 1.32074500  | -0.76683200 | H   | -0.69202700 | -4.45503300 | -2.19317200 |
| C   | -3.35275100 | 2.02789000  | -0.80543400 | 4_T |             |             |             |
| C   | -2.15349000 | 1.34865600  | -0.56871900 | C   | -4.50780600 | 0.18348800  | -0.59931100 |
| C   | -2.13225000 | -0.03374400 | -0.29244200 | C   | -4.47101600 | 1.56882200  | -0.79364400 |
| C   | -3.34486300 | -0.72838800 | -0.25306000 | C   | -3.25198600 | 2.24573700  | -0.78250000 |
| H   | -5.48715000 | -0.59666400 | -0.45619000 | C   | -2.07582300 | 1.52117300  | -0.57900700 |
| H   | -5.49350000 | 1.83322600  | -0.94657900 | C   | -2.10313200 | 0.12862900  | -0.39044000 |
| H   | -3.32281600 | 3.09326400  | -1.01395400 | C   | -3.32680300 | -0.54301200 | -0.39965300 |
| H   | -2.04268900 | 0.81859300  | 1.52347600  | H   | -5.46244000 | -0.33581100 | -0.60395400 |
| H   | -3.35592500 | -1.79442400 | -0.04324300 | H   | -5.39552400 | 2.11712300  | -0.94792400 |
| C   | -0.82560000 | 2.03794700  | -0.56796300 | H   | -3.19350900 | 3.32090700  | -0.92410500 |
| O   | -0.66996400 | 3.24005400  | -0.79876300 | H   | -2.14225100 | 0.56159000  | 1.62347100  |
| N   | 0.15680100  | 1.13137000  | -0.25692100 | H   | -3.36323400 | -1.61829700 | -0.25282400 |
| C   | 1.51458200  | 1.38751800  | -0.23340500 | C   | -0.72803300 | 2.15578100  | -0.52330000 |
| C   | 2.32481900  | 0.21601400  | -0.07749100 | O   | -0.51355600 | 3.35869800  | -0.65739500 |
| C   | 2.15924700  | 2.61808100  | -0.34111800 | N   | 0.22197300  | 1.17773500  | -0.28190300 |
| C   | 3.74422300  | 0.29346700  | -0.02025300 | C   | 1.59249100  | 1.39521200  | -0.18229600 |
| C   | 3.56882700  | 2.68660100  | -0.28410000 | C   | 2.35927200  | 0.19265900  | -0.07506300 |
| H   | 1.56365500  | 3.50980100  | -0.47373400 | C   | 2.27323500  | 2.60726000  | -0.17940900 |
| C   | 2.34682900  | -2.10228100 | 0.14779700  | C   | 3.77496600  | 0.21721400  | 0.03626000  |
| C   | 4.44643700  | -0.92859100 | 0.13412400  | C   | 3.68369500  | 2.62785000  | -0.06762400 |
| C   | 4.35942300  | 1.56640200  | -0.12519100 | H   | 1.71224600  | 3.52616100  | -0.26984200 |
| H   | 4.03819000  | 3.66255900  | -0.37013500 | C   | 2.29751500  | -2.13663000 | 0.00424700  |
| C   | 3.75554800  | -2.11786800 | 0.21708000  | C   | 4.43158800  | -1.03428800 | 0.13412800  |
| H   | 1.76224800  | -3.01482800 | 0.20678500  | C   | 4.43210600  | 1.47519100  | 0.03966300  |
| H   | 5.53166600  | -0.91330500 | 0.18333400  | H   | 4.18358200  | 3.59200600  | -0.06865600 |
| H   | 5.44141500  | 1.64142900  | -0.08441700 | C   | 3.70015900  | -2.20353900 | 0.11829900  |
| H   | 4.27287500  | -3.06369800 | 0.33362700  | H   | 1.67763400  | -3.02723800 | -0.00869800 |
| N   | 1.66589200  | -0.97794700 | 0.00684700  | H   | 5.51430500  | -1.05942900 | 0.21999800  |
| Co  | -0.33725700 | -0.68743500 | -0.08816800 | H   | 5.51357900  | 1.51144600  | 0.12362100  |
| C   | -0.84879100 | 0.00332200  | 2.73707500  | H   | 4.18324200  | -3.17126700 | 0.19198200  |
| O   | -1.82166900 | 0.84889000  | 2.48699400  | N   | 1.65918900  | -0.98141300 | -0.08801200 |
| O   | -0.27557300 | -0.67752100 | 1.87464700  | Co  | -0.33015300 | -0.62481300 | -0.18877200 |
| C   | -0.67121800 | -2.40242500 | -1.60036000 | C   | -0.92605800 | -0.14973300 | 2.88116800  |

|      |             |             |             |      |             |             |             |
|------|-------------|-------------|-------------|------|-------------|-------------|-------------|
| O    | -1.96759400 | 0.61664000  | 2.59054000  | Co   | -1.36626000 | -0.16276400 | -0.67115000 |
| O    | -0.30273500 | -0.79660200 | 2.03985800  | C    | 0.15117300  | -2.15694000 | 2.74143200  |
| C    | -0.81630200 | -2.52680300 | -1.66833400 | C    | -1.17321700 | -2.08436900 | 2.86044500  |
| O    | -0.83881700 | -2.51626700 | -0.37635900 | C    | -2.40178700 | -1.28727900 | 2.77217100  |
| O    | -0.51996600 | -1.47804100 | -2.28796000 | C    | -2.42865400 | -2.77041100 | 3.17747000  |
| C    | -0.56976800 | -0.14179100 | 4.33680700  | H    | -2.78880100 | -1.03727600 | 1.78644500  |
| H    | 0.19593500  | -0.89007600 | 4.53727300  | H    | -2.60227400 | -0.54044500 | 3.53904700  |
| H    | -0.19213600 | 0.85100600  | 4.60373600  | H    | -2.64887500 | -3.01367700 | 4.21599700  |
| H    | -1.45901200 | -0.33001000 | 4.94421100  | H    | -2.84222300 | -3.47629000 | 2.45867500  |
| C    | -1.17576000 | -3.80501900 | -2.37888500 | C    | -3.14942300 | -1.39670600 | -1.82668000 |
| H    | -2.26060900 | -3.94762000 | -2.32087000 | O    | -2.93624000 | -1.64999500 | -0.59631300 |
| H    | -0.88094700 | -3.75782500 | -3.42790600 | O    | -2.41888800 | -0.54456300 | -2.43091000 |
| H    | -0.70385100 | -4.66048100 | -1.88876000 | C    | -4.28073000 | -2.07275700 | -2.55442300 |
|      |             |             |             | H    | -5.20574000 | -1.52310200 | -2.34547800 |
| 5s_Q |             |             |             | H    | -4.11042800 | -2.06542700 | -3.63218600 |
| C    | -3.34446900 | 3.33795500  | 1.13449800  | H    | -4.40929600 | -3.09527700 | -2.19279300 |
| C    | -2.56275900 | 4.36292400  | 0.58577700  | H    | 0.63169900  | -3.11650600 | 2.93293200  |
| C    | -1.45677200 | 4.04453600  | -0.19606600 | C    | 1.05005800  | -1.06750700 | 2.34663600  |
| C    | -1.14912600 | 2.69726600  | -0.42847300 | C    | 2.40165900  | -1.34901700 | 2.07359300  |
| C    | -1.92594500 | 1.64462600  | 0.10551000  | C    | 0.62096100  | 0.26096600  | 2.19508500  |
| C    | -3.02165300 | 1.99616100  | 0.90446400  | C    | 3.27629800  | -0.36106100 | 1.64486900  |
| H    | -4.21019500 | 3.59020800  | 1.74225300  | H    | 2.76378100  | -2.36729900 | 2.18680800  |
| H    | -2.81661000 | 5.40158700  | 0.77661200  | C    | 1.48778300  | 1.26436600  | 1.76915000  |
| H    | -0.82097000 | 4.81675000  | -0.61901900 | H    | -0.41057200 | 0.51996200  | 2.40294700  |
| H    | -3.64925900 | 1.22303800  | 1.34234200  | C    | 2.82300800  | 0.95565800  | 1.47800700  |
| C    | 0.06725200  | 2.33601100  | -1.19868100 | H    | 4.31354700  | -0.58507000 | 1.42032600  |
| O    | 0.86229100  | 3.15058700  | -1.66767900 | H    | 1.10826500  | 2.27096700  | 1.64748500  |
| N    | 0.21702500  | 0.94187100  | -1.27133800 | O    | 3.74247200  | 1.85114400  | 1.02781700  |
| C    | 1.39350900  | 0.30565100  | -1.50312200 | C    | 3.32770900  | 3.20361600  | 0.85282400  |
| C    | 1.34192300  | -1.11146900 | -1.23093600 | H    | 4.20620200  | 3.73957200  | 0.48885800  |
| C    | 2.61714800  | 0.85641300  | -1.92085200 | H    | 2.52238600  | 3.29070300  | 0.11599000  |
| C    | 2.49070800  | -1.92660400 | -1.38407700 | H    | 3.00582700  | 3.64850400  | 1.80273000  |
| C    | 3.74802600  | 0.03705300  | -2.07055700 |      |             |             |             |
| H    | 2.66464200  | 1.91405000  | -2.13404700 | 5s_S |             |             |             |
| C    | 0.05614000  | -2.90139300 | -0.49829300 | C    | 4.40830400  | -2.42639300 | -0.46825600 |
| C    | 2.35725900  | -3.29834800 | -1.06675000 | C    | 3.67879300  | -3.38485000 | -1.17873200 |
| C    | 3.70354600  | -1.32154000 | -1.81327500 | C    | 2.35060000  | -3.12972900 | -1.52303100 |
| H    | 4.67926600  | 0.49021700  | -2.39471800 | C    | 1.76369800  | -1.92460900 | -1.13472000 |
| C    | 1.14164600  | -3.78557900 | -0.62952300 | C    | 2.47573800  | -0.97113600 | -0.38542400 |
| H    | -0.91658200 | -3.23708300 | -0.15766800 | C    | 3.81297200  | -1.21906200 | -0.07673400 |
| H    | 3.21685500  | -3.95480800 | -1.16634400 | H    | 5.44835300  | -2.61842200 | -0.21624300 |
| H    | 4.58853800  | -1.93896600 | -1.93160300 | H    | 4.14970700  | -4.31865900 | -1.47184400 |
| H    | 1.01077700  | -4.83232900 | -0.37975800 | H    | 1.76268900  | -3.84261900 | -2.09417500 |
| N    | 0.16074000  | -1.60731100 | -0.78143800 | H    | 4.39644900  | -0.48550100 | 0.47276700  |

|    |             |             |             |      |             |             |             |
|----|-------------|-------------|-------------|------|-------------|-------------|-------------|
| C  | 0.36759400  | -1.55563400 | -1.50301000 | H    | -4.53097400 | 0.59074100  | 1.46881400  |
| O  | -0.39336100 | -2.26996300 | -2.16196800 | H    | -2.84470900 | -3.17251000 | 0.23799000  |
| N  | 0.07683000  | -0.30501000 | -1.00536100 | O    | -5.07812000 | -1.59954200 | 0.32539900  |
| C  | -1.08383200 | 0.40550400  | -1.24088900 | C    | -5.26677400 | -2.81530600 | -0.39148300 |
| C  | -1.12093200 | 1.69530200  | -0.61652400 | H    | -6.30592300 | -2.80918300 | -0.72440100 |
| C  | -2.19525700 | 0.00805700  | -1.98206800 | H    | -4.60590300 | -2.87097600 | -1.26468600 |
| C  | -2.24701300 | 2.55580300  | -0.74961000 | H    | -5.09946500 | -3.69097900 | 0.24730300  |
| C  | -3.30987400 | 0.86528200  | -2.10412200 |      |             |             |             |
| H  | -2.18673300 | -0.96547800 | -2.44885600 | 5s_T |             |             |             |
| C  | 0.00281900  | 3.22352400  | 0.73822400  | C    | 4.42843200  | -2.17661900 | -0.63480600 |
| C  | -2.18236400 | 3.80339700  | -0.08174500 | C    | 3.73367400  | -3.21156100 | -1.27108100 |
| C  | -3.35593900 | 2.11068200  | -1.51136100 | C    | 2.39207200  | -3.04519400 | -1.61578400 |
| H  | -4.16110600 | 0.51938200  | -2.68357300 | C    | 1.75896300  | -1.83925600 | -1.31109200 |
| C  | -1.06588400 | 4.13854200  | 0.65518300  | C    | 2.44742400  | -0.80552700 | -0.66137000 |
| H  | 0.89942500  | 3.44409900  | 1.30910200  | C    | 3.79022800  | -0.96730600 | -0.32949600 |
| H  | -3.02277300 | 4.48791900  | -0.15628000 | H    | 5.47412700  | -2.31218100 | -0.37172800 |
| H  | -4.22396200 | 2.75371500  | -1.61632400 | H    | 4.24247500  | -4.14361100 | -1.49840400 |
| H  | -0.99614500 | 5.08849400  | 1.17338000  | H    | 1.82898200  | -3.82846300 | -2.11501200 |
| N  | -0.03204500 | 2.04806600  | 0.12961000  | H    | 4.33718900  | -0.17546700 | 0.17212400  |
| Co | 1.39799400  | 0.55777800  | 0.03106600  | C    | 0.33417300  | -1.56140900 | -1.63609500 |
| C  | -0.00916800 | -0.06613200 | 2.20156400  | O    | -0.42594800 | -2.34222500 | -2.20540800 |
| C  | 1.13762800  | -0.78473900 | 2.24633400  | N    | 0.01141800  | -0.28984500 | -1.19078600 |
| C  | 1.67340000  | -2.14038900 | 2.42133300  | C    | -1.23371900 | 0.31417000  | -1.31575800 |
| C  | 2.40583500  | -0.90509300 | 2.97217000  | C    | -1.32860600 | 1.58043400  | -0.66248600 |
| H  | 2.14134600  | -2.64868400 | 1.58503700  | C    | -2.35876200 | -0.16754900 | -1.97456100 |
| H  | 1.14351900  | -2.79211000 | 3.11389800  | C    | -2.53416500 | 2.33160400  | -0.66239500 |
| H  | 2.39958700  | -0.71476500 | 4.04363600  | C    | -3.55508800 | 0.58662100  | -1.98111000 |
| H  | 3.32602300  | -0.63043000 | 2.46702600  | H    | -2.30510800 | -1.12681600 | -2.46751400 |
| C  | 3.14855000  | 2.11374600  | -0.41019600 | C    | -0.22602600 | 3.16934200  | 0.64151200  |
| O  | 2.94843900  | 1.74008700  | 0.79128000  | C    | -2.52541900 | 3.55439000  | 0.04956700  |
| O  | 2.37699700  | 1.61821800  | -1.30566000 | C    | -3.66091400 | 1.80451800  | -1.34475900 |
| C  | 4.25188600  | 3.05279200  | -0.78501400 | H    | -4.41720700 | 0.17687800  | -2.49831600 |
| H  | 5.14592500  | 2.46329700  | -1.01819600 | C    | -1.38188500 | 3.97006400  | 0.70233300  |
| H  | 3.98141500  | 3.62826800  | -1.67242000 | H    | 0.69681800  | 3.45354300  | 1.13645900  |
| H  | 4.48395700  | 3.71771000  | 0.04906900  | H    | -3.42945700 | 4.15600300  | 0.08019900  |
| H  | 0.02643500  | 0.95738400  | 2.56804200  | H    | -4.59044900 | 2.36449400  | -1.35069300 |
| C  | -1.31824800 | -0.54818400 | 1.78109200  | H    | -1.35709500 | 4.90061100  | 1.25789200  |
| C  | -2.43109800 | 0.30844100  | 1.87997200  | N    | -0.20519400 | 2.02060300  | -0.01900200 |
| C  | -1.50665000 | -1.81364200 | 1.20359400  | Co   | 1.31809700  | 0.70897700  | -0.28404200 |
| C  | -3.67683400 | -0.07476200 | 1.41287400  | C    | 0.23385400  | -0.29559700 | 2.53743700  |
| H  | -2.30190300 | 1.29774700  | 2.30993200  | C    | 1.33058000  | -1.05526100 | 2.57905800  |
| C  | -2.74571500 | -2.20546000 | 0.71367900  | C    | 1.95512900  | -2.36760900 | 2.38502200  |
| H  | -0.66223600 | -2.48337600 | 1.09526700  | C    | 2.72178500  | -1.19193900 | 3.01220800  |
| C  | -3.83789300 | -1.32876200 | 0.80436200  | H    | 2.24118900  | -2.67411800 | 1.38201400  |

|       |             |             |             |    |             |             |             |
|-------|-------------|-------------|-------------|----|-------------|-------------|-------------|
| H     | 1.64708900  | -3.18614300 | 3.03424200  | C  | 2.42551200  | 2.16066700  | 1.10715600  |
| H     | 2.93902100  | -1.22757600 | 4.07869700  | C  | 3.11461000  | 0.40546800  | 2.61657800  |
| H     | 3.49982100  | -0.73018100 | 2.40915600  | H  | 1.75273400  | -1.27765200 | 2.85433100  |
| C     | 3.06897500  | 2.39626800  | -0.33364900 | C  | 0.43802100  | 3.03011100  | -0.63362900 |
| O     | 2.63630700  | 1.78626400  | 0.71758300  | C  | 2.57747000  | 3.38623000  | 0.41292300  |
| O     | 2.56936300  | 2.10805900  | -1.45139100 | C  | 3.37542100  | 1.61731000  | 2.00819900  |
| C     | 4.17428000  | 3.40582600  | -0.18690100 | H  | 3.84327300  | -0.01065500 | 3.30665600  |
| H     | 5.12983500  | 2.87287800  | -0.12492900 | C  | 1.59093800  | 3.81922300  | -0.44737900 |
| H     | 4.20276100  | 4.07178600  | -1.05045400 | H  | -0.35707500 | 3.32529100  | -1.30940800 |
| H     | 4.05171200  | 3.97853000  | 0.73522800  | H  | 3.47797000  | 3.97440800  | 0.56495000  |
| H     | 0.30121100  | 0.71746000  | 2.93283300  | H  | 4.29351400  | 2.16079000  | 2.20692100  |
| C     | -1.07954800 | -0.69185000 | 2.02029700  | H  | 1.68618300  | 4.75353500  | -0.98924900 |
| C     | -2.17530600 | 0.17711100  | 2.16979600  | N  | 0.27150700  | 1.88012600  | 0.00148900  |
| C     | -1.29078200 | -1.89490700 | 1.32954300  | Co | -1.20360500 | 0.59559500  | -0.17723300 |
| C     | -3.42243300 | -0.13293500 | 1.64680600  | C  | -0.22975900 | -0.21054800 | -1.77316700 |
| H     | -2.03654100 | 1.11961600  | 2.69294800  | C  | -1.36010100 | -1.05761500 | -1.65581200 |
| C     | -2.53142600 | -2.21429800 | 0.78768800  | C  | -1.47911200 | -2.50618700 | -1.95519200 |
| H     | -0.46257100 | -2.57854300 | 1.18337300  | C  | -2.26372200 | -1.46873600 | -2.76081500 |
| C     | -3.60449200 | -1.32445600 | 0.93359300  | H  | -2.06364600 | -3.14245300 | -1.30076900 |
| H     | -4.26107900 | 0.54729200  | 1.74704700  | H  | -0.60973800 | -2.98246900 | -2.40044100 |
| H     | -2.64187400 | -3.13419000 | 0.22795300  | H  | -1.92793100 | -1.21807700 | -3.76369500 |
| O     | -4.84352900 | -1.51921100 | 0.40301200  | H  | -3.33742900 | -1.47346900 | -2.63185700 |
| C     | -5.04009700 | -2.66312600 | -0.41724800 | C  | -2.84968600 | 2.28775900  | -0.12158600 |
| H     | -6.06723800 | -2.60067200 | -0.78141000 | O  | -2.35159700 | 1.81833600  | -1.20914600 |
| H     | -4.35271500 | -2.67081300 | -1.27158400 | O  | -2.41972400 | 1.81389400  | 0.97036500  |
| H     | -4.91802000 | -3.59480700 | 0.14953400  | C  | -3.92879500 | 3.32848800  | -0.16635300 |
|       |             |             |             | H  | -4.89277600 | 2.82660800  | -0.30864200 |
| TS1_S |             |             |             | H  | -3.96366700 | 3.88411200  | 0.77225300  |
| C     | -4.83711300 | -1.62066600 | 0.33012700  | H  | -3.77254500 | 4.00694500  | -1.00818700 |
| C     | -4.43060500 | -2.47044000 | 1.36374200  | C  | 1.16588200  | -0.62702100 | -1.57342700 |
| C     | -3.09336600 | -2.48490400 | 1.76343900  | C  | 2.19396400  | 0.22223900  | -2.02559400 |
| C     | -2.16595900 | -1.67463700 | 1.10995900  | C  | 1.54262000  | -1.80149400 | -0.90532000 |
| C     | -2.55469800 | -0.86339200 | 0.02264000  | C  | 3.52975900  | -0.06871500 | -1.79802800 |
| C     | -3.90379500 | -0.82498300 | -0.33935500 | H  | 1.93093500  | 1.14058900  | -2.54310000 |
| H     | -5.88336000 | -1.58114500 | 0.03964100  | C  | 2.87960400  | -2.10687600 | -0.66569900 |
| H     | -5.15763300 | -3.09997000 | 1.86807200  | H  | 0.78329400  | -2.47078100 | -0.52163300 |
| H     | -2.75464600 | -3.09240000 | 2.59717400  | C  | 3.88400700  | -1.23173400 | -1.09928900 |
| H     | -4.22756700 | -0.17986500 | -1.14970800 | H  | 4.31676900  | 0.59887600  | -2.13283900 |
| C     | -0.77538800 | -1.52289200 | 1.63044400  | H  | 3.12383000  | -3.01157700 | -0.12316200 |
| O     | -0.25655000 | -2.29227300 | 2.44777700  | H  | -0.34748300 | 0.62413300  | -2.46291700 |
| N     | -0.22464700 | -0.38714900 | 1.11241800  | O  | 5.21511900  | -1.42097900 | -0.89019200 |
| C     | 0.97485900  | 0.17366700  | 1.49454900  | C  | 5.60954000  | -2.52849200 | -0.09025700 |
| C     | 1.23112800  | 1.43001300  | 0.86484500  | H  | 5.33889000  | -3.48387000 | -0.55700200 |
| C     | 1.93164300  | -0.32667500 | 2.37379600  | H  | 6.69614400  | -2.46867500 | -0.00666000 |

|       |             |             |             |     |             |             |             |
|-------|-------------|-------------|-------------|-----|-------------|-------------|-------------|
| H     | 5.16601900  | -2.47694500 | 0.91180200  | C   | 1.52275500  | -0.92234600 | 1.81660600  |
|       |             |             |             | C   | 1.62829800  | -2.36472400 | 2.14230400  |
| TS1_T |             |             |             | C   | 2.49680200  | -1.33168500 | 2.86295200  |
| C     | 5.02618100  | -1.20002800 | -0.17117000 | H   | 2.14162400  | -3.02703500 | 1.45428000  |
| C     | 4.74137700  | -2.22123900 | -1.08432800 | H   | 0.79171700  | -2.81467800 | 2.67085500  |
| C     | 3.42179300  | -2.46454300 | -1.46808800 | H   | 2.24810700  | -1.06244700 | 3.88639500  |
| C     | 2.38623700  | -1.69931400 | -0.92973300 | H   | 3.55662200  | -1.35337200 | 2.64238100  |
| C     | 2.66728100  | -0.72412400 | 0.04674400  | H   | 0.63163900  | 0.89311400  | 2.47930700  |
| C     | 3.99091200  | -0.45886800 | 0.40324300  | C   | 2.64590800  | 2.70318000  | -0.03809300 |
| H     | 6.05548400  | -0.98806200 | 0.10459700  | O   | 2.04174200  | 2.40873800  | 1.04141900  |
| H     | 5.54908600  | -2.80822600 | -1.51114700 | O   | 2.49537300  | 1.96951600  | -1.06568000 |
| H     | 3.17519000  | -3.21607600 | -2.21225100 | C   | 3.57430200  | 3.89040100  | -0.09682500 |
| H     | 4.21240300  | 0.30964500  | 1.13740800  | H   | 4.59385900  | 3.54813200  | 0.11527800  |
| C     | 0.99365000  | -1.79975000 | -1.46986500 | H   | 3.57062800  | 4.33205900  | -1.09565100 |
| O     | 0.57249100  | -2.79171300 | -2.07597000 | H   | 3.29962500  | 4.63602400  | 0.65177300  |
| N     | 0.33118500  | -0.62990500 | -1.21868000 | O   | -5.06721800 | -0.91372700 | 1.17909000  |
| C     | -0.96375700 | -0.34723800 | -1.60253700 | C   | -5.55100100 | -2.02767800 | 0.43399600  |
| C     | -1.44871300 | 0.92531300  | -1.14053500 | H   | -5.35313200 | -2.97469700 | 0.95030600  |
| C     | -1.83314300 | -1.14536300 | -2.34179600 | H   | -6.62955400 | -1.88555700 | 0.34966000  |
| C     | -2.78250900 | 1.34497400  | -1.40145100 | H   | -5.10704500 | -2.05601000 | -0.56745700 |
| C     | -3.15554300 | -0.71958900 | -2.59683900 |     |             |             |             |
| H     | -1.47932600 | -2.10289100 | -2.69662000 | 5_Q |             |             |             |
| C     | -0.97475700 | 2.88665800  | 0.03134600  | C   | -5.03206900 | -0.01438700 | 0.28885000  |
| C     | -3.17124600 | 2.61108900  | -0.90004700 | C   | -4.53500700 | 0.51771500  | 1.47886300  |
| C     | -3.64046900 | 0.48738700  | -2.13772300 | C   | -3.27328700 | 0.13073200  | 1.92898100  |
| H     | -3.80518000 | -1.37218300 | -3.17374500 | C   | -2.50189300 | -0.78711800 | 1.20260800  |
| C     | -2.27196500 | 3.38459300  | -0.19753900 | C   | -2.99899600 | -1.32961000 | -0.00045100 |
| H     | -0.23678200 | 3.44332500  | 0.60020300  | C   | -4.26712700 | -0.92623400 | -0.43783300 |
| H     | -4.18428100 | 2.96125000  | -1.07741100 | H   | -6.01195100 | 0.28058400  | -0.07535700 |
| H     | -4.65982000 | 0.80057800  | -2.33995800 | H   | -5.12005200 | 1.23081200  | 2.05155700  |
| H     | -2.54702500 | 4.35922100  | 0.18992100  | H   | -2.86963100 | 0.54941700  | 2.84625300  |
| N     | -0.58717800 | 1.70242100  | -0.41584900 | H   | -4.64953500 | -1.32889200 | -1.37087300 |
| Co    | 1.17805900  | 0.70785300  | -0.03463500 | C   | -1.12390100 | -1.13301800 | 1.73184700  |
| C     | -3.29284400 | 0.35508300  | 2.02702000  | O   | -0.90891400 | -2.18067800 | 2.34743900  |
| C     | -3.73104200 | -0.81523300 | 1.38176100  | N   | -0.22958000 | -0.14747900 | 1.43216700  |
| C     | -2.79423200 | -1.78367100 | 0.99251000  | C   | 1.11183800  | -0.17547600 | 1.78834100  |
| C     | -1.44001300 | -1.56324000 | 1.20831300  | C   | 1.91888400  | 0.81241900  | 1.12790400  |
| C     | -0.97614300 | -0.37982800 | 1.81534100  | C   | 1.74165200  | -1.04687200 | 2.67045100  |
| C     | -1.94384800 | 0.56450500  | 2.23316600  | C   | 3.32041100  | 0.89472300  | 1.35970500  |
| H     | -4.03096800 | 1.09003300  | 2.32930200  | C   | 3.13132800  | -0.94761800 | 2.90921200  |
| H     | -3.10678700 | -2.68980500 | 0.49007100  | H   | 1.15295500  | -1.81264800 | 3.15423600  |
| H     | -0.72912400 | -2.29793800 | 0.85246300  | C   | 1.99896600  | 2.53839600  | -0.43666200 |
| H     | -1.61029700 | 1.48464400  | 2.70352700  | C   | 4.04297100  | 1.86464000  | 0.62352900  |
| C     | 0.42549700  | -0.05325100 | 1.98334800  | C   | 3.91788400  | -0.00721200 | 2.27879500  |



|     |             |             |             |    |             |             |             |
|-----|-------------|-------------|-------------|----|-------------|-------------|-------------|
| H   | 3.58462900  | -1.64279900 | 3.61012700  | C  | -4.95743100 | -0.76136600 | 1.10083100  |
| C   | 3.38891900  | 2.68343100  | -0.27123700 | C  | -3.77317600 | -0.95054200 | 1.80370900  |
| H   | 1.44842900  | 3.16111800  | -1.13505900 | C  | -2.58155500 | -1.23676100 | 1.12511100  |
| H   | 5.11633000  | 1.94724500  | 0.76887000  | C  | -2.58679400 | -1.40217500 | -0.28590800 |
| H   | 4.98418300  | 0.05833600  | 2.47178600  | C  | -3.79692200 | -1.18664600 | -0.97386600 |
| H   | 3.92211100  | 3.42804300  | -0.85115300 | H  | -5.88356700 | -0.68971400 | -0.84892500 |
| N   | 1.29533900  | 1.64004700  | 0.23727100  | H  | -5.87230400 | -0.52357500 | 1.63504200  |
| Co  | -0.72666200 | 1.17228200  | 0.06127100  | H  | -3.74614600 | -0.85127600 | 2.88393800  |
| C   | -1.27002600 | -1.42125500 | -1.77961500 | H  | -3.80846000 | -1.30299700 | -2.05268300 |
| C   | -2.15109200 | -2.21982000 | -0.88325600 | C  | -1.29019600 | -1.20491300 | 1.91400400  |
| C   | -1.77820200 | -3.60406500 | -0.40428100 | O  | -1.08538700 | -1.87103000 | 2.93048000  |
| C   | -2.83367000 | -3.45344700 | -1.46309800 | N  | -0.48595300 | -0.26507500 | 1.35687700  |
| H   | -2.07898000 | -3.87114400 | 0.60205100  | C  | 0.73947600  | 0.17659700  | 1.80989600  |
| H   | -0.81995600 | -4.00764000 | -0.71011000 | C  | 1.26020200  | 1.22896900  | 0.99896100  |
| H   | -2.57676400 | -3.73086700 | -2.48078800 | C  | 1.50358300  | -0.27567400 | 2.87862200  |
| H   | -3.86892400 | -3.63036100 | -1.18803900 | C  | 2.53381500  | 1.80267000  | 1.23666400  |
| C   | -2.21580900 | 2.88759900  | -0.74835700 | C  | 2.77402100  | 0.29740900  | 3.11705600  |
| O   | -1.83000100 | 1.91537600  | -1.48829600 | H  | 1.11874100  | -1.06977900 | 3.50400300  |
| O   | -1.72548000 | 2.99590300  | 0.41854200  | C  | 0.87425900  | 2.59887800  | -0.85540400 |
| C   | -3.26263700 | 3.84403200  | -1.24485300 | C  | 2.94539700  | 2.83362800  | 0.35574400  |
| H   | -4.24658100 | 3.39953800  | -1.05635000 | C  | 3.29426300  | 1.30438500  | 2.32687800  |
| H   | -3.20397000 | 4.79451800  | -0.71226400 | H  | 3.35698000  | -0.07525500 | 3.95439100  |
| H   | -3.16292700 | 3.99863300  | -2.32120400 | C  | 2.11836300  | 3.23325600  | -0.67291700 |
| C   | 0.13986700  | -1.29408800 | -1.76432900 | H  | 0.20048000  | 2.85840100  | -1.66336200 |
| C   | 0.76624800  | -0.42858300 | -2.71808100 | H  | 3.91558100  | 3.30036200  | 0.49860800  |
| C   | 1.00517600  | -1.94145100 | -0.83634900 | H  | 4.27114000  | 1.73010500  | 2.53220000  |
| C   | 2.12970000  | -0.22538400 | -2.73317600 | H  | 2.41262100  | 4.02028900  | -1.35762200 |
| H   | 0.13878000  | 0.08757500  | -3.43884000 | N  | 0.47084300  | 1.62987500  | -0.04598900 |
| C   | 2.37836100  | -1.74641900 | -0.85861100 | Co | -1.11566400 | 0.61190200  | -0.18780400 |
| H   | 0.58555800  | -2.56027900 | -0.05510600 | C  | -0.39721200 | -0.76227200 | -1.39447400 |
| C   | 2.95646700  | -0.88197000 | -1.80032100 | C  | -1.35561000 | -1.89131400 | -1.03947100 |
| H   | 2.59081200  | 0.44089900  | -3.45524400 | C  | -0.89888700 | -3.30369200 | -0.74843400 |
| H   | 2.98800000  | -2.23670500 | -0.11015300 | C  | -1.58100300 | -2.99544900 | -2.05380600 |
| H   | -1.80016000 | -0.79915200 | -2.49781600 | H  | -1.45500800 | -3.85985100 | -0.00006700 |
| O   | 4.28533000  | -0.60290000 | -1.88082500 | H  | 0.16107400  | -3.52164500 | -0.77656200 |
| C   | 5.16901900  | -1.32045600 | -1.02713100 | H  | -0.96512300 | -2.96872200 | -2.94815300 |
| H   | 5.11883400  | -2.39975200 | -1.21808200 | H  | -2.59197500 | -3.35952000 | -2.20838200 |
| H   | 6.17239600  | -0.96107400 | -1.26273200 | C  | -2.71126900 | 2.37122500  | -0.75957300 |
| H   | 4.95467500  | -1.13181200 | 0.03034900  | O  | -1.99225400 | 1.68061300  | -1.58227800 |
|     |             |             |             | O  | -2.56648900 | 2.20184900  | 0.47829700  |
|     |             |             |             | C  | -3.73007500 | 3.32668400  | -1.32000900 |
|     |             |             |             | H  | -4.61982400 | 2.75653800  | -1.61037400 |
|     |             |             |             | H  | -4.01777900 | 4.06510800  | -0.56995700 |
|     |             |             |             | H  | -3.34317100 | 3.82057100  | -2.21466300 |
| 5_S |             |             |             |    |             |             |             |
| C   | -4.96396800 | -0.85488000 | -0.29579600 |    |             |             |             |

|     |             |             |             |       |             |             |             |
|-----|-------------|-------------|-------------|-------|-------------|-------------|-------------|
| C   | 1.07162600  | -0.95212800 | -1.37303800 | H     | -3.98198700 | 3.83067100  | -0.08339700 |
| C   | 1.85105900  | -0.31861300 | -2.36256900 | H     | -4.12741900 | -0.07152000 | 2.78483100  |
| C   | 1.76545800  | -1.62545700 | -0.35459300 | N     | -1.18910600 | 0.43522200  | 1.23971600  |
| C   | 3.23725900  | -0.32916500 | -2.32413600 | Co    | 0.77351000  | -0.18545700 | 0.87774000  |
| H   | 1.34732700  | 0.20975000  | -3.16790000 | C     | 0.77874200  | -1.61671100 | -0.77991000 |
| C   | 3.15834000  | -1.64926000 | -0.30062600 | C     | 1.74106900  | -1.11853900 | -1.81352400 |
| H   | 1.21433100  | -2.10659500 | 0.44166900  | C     | 1.33412800  | -0.61634100 | -3.17928600 |
| C   | 3.90498100  | -0.98593000 | -1.28017000 | C     | 1.93560900  | -1.98760100 | -3.05605700 |
| H   | 3.82575300  | 0.17331200  | -3.08506400 | H     | 1.94507000  | 0.17504900  | -3.60108400 |
| H   | 3.64381300  | -2.16091400 | 0.52095800  | H     | 0.28557900  | -0.55560800 | -3.43721700 |
| H   | -0.70248700 | -0.30583500 | -2.34128200 | H     | 1.27099000  | -2.83850700 | -3.16965000 |
| O   | 5.26598400  | -0.91860600 | -1.30174300 | H     | 2.95152400  | -2.14836900 | -3.40195100 |
| C   | 5.97066800  | -1.49459900 | -0.21031900 | C     | 1.59407100  | -0.64710400 | 3.16082800  |
| H   | 5.81336100  | -2.57902000 | -0.15135300 | O     | 1.39774100  | -1.50957100 | 2.21506600  |
| H   | 7.02842500  | -1.29825500 | -0.39514600 | O     | 1.36885600  | 0.56769600  | 2.94939300  |
| H   | 5.67806500  | -1.03624900 | 0.74292100  | C     | 2.09551500  | -1.15427700 | 4.48774300  |
| 5_T |             |             |             | H     | 3.06880200  | -1.63543300 | 4.34804900  |
| C   | 5.26316900  | -0.79943400 | -0.38237500 | H     | 2.18902000  | -0.33803800 | 5.20485400  |
| C   | 5.31068300  | 0.55433400  | -0.04410900 | H     | 1.40936200  | -1.91387000 | 4.87530000  |
| C   | 4.20240000  | 1.36462700  | -0.27984000 | C     | -0.65686900 | -1.76535400 | -0.91436600 |
| C   | 3.03096500  | 0.82985700  | -0.82898700 | C     | -1.30161200 | -2.80405900 | -0.19244800 |
| C   | 2.98834500  | -0.52803300 | -1.20030700 | C     | -1.48700700 | -0.84242800 | -1.59090000 |
| C   | 4.11258200  | -1.32835400 | -0.96565400 | C     | -2.67818600 | -2.90480300 | -0.13984200 |
| H   | 6.12247900  | -1.43889400 | -0.20338200 | H     | -0.69147700 | -3.52422900 | 0.34490500  |
| H   | 6.20764700  | 0.97734300  | 0.39819700  | C     | -2.87083600 | -0.93203400 | -1.54144300 |
| H   | 4.22824300  | 2.42074200  | -0.03083300 | H     | -1.04444800 | 0.00603500  | -2.09316300 |
| H   | 4.08203600  | -2.37547600 | -1.25216200 | C     | -3.48022500 | -1.95793400 | -0.80291200 |
| C   | 1.85548400  | 1.75997900  | -1.02290100 | H     | -3.16483100 | -3.69657000 | 0.42006600  |
| O   | 1.98565900  | 2.77224500  | -1.71891500 | H     | -3.46494700 | -0.18059800 | -2.04593600 |
| N   | 0.74911800  | 1.38067200  | -0.31715100 | H     | 1.23738600  | -2.39060600 | -0.16093300 |
| C   | -0.43888700 | 2.10642400  | -0.30638300 | O     | -4.81856300 | -2.11007200 | -0.65917400 |
| C   | -1.47268400 | 1.57171200  | 0.53948900  | C     | -5.67246600 | -1.13335000 | -1.24897100 |
| C   | -0.73778200 | 3.25366200  | -1.03944500 | H     | -5.57221700 | -1.11774600 | -2.34059700 |
| C   | -2.75485800 | 2.18730500  | 0.61898900  | H     | -6.68969700 | -1.42753700 | -0.98654600 |
| C   | -2.00965800 | 3.86133800  | -0.94684500 | H     | -5.46878800 | -0.13311300 | -0.84918900 |
| H   | 0.02576600  | 3.67191800  | -1.67782800 | TS2_Q |             |             |             |
| C   | -2.11022100 | -0.11935700 | 2.00864600  | C     | 0.84510600  | 5.41434400  | 0.80190500  |
| C   | -3.71988600 | 1.57096300  | 1.45484700  | C     | 0.07352100  | 4.30183000  | 1.11707900  |
| C   | -3.00782800 | 3.35527800  | -0.14330800 | C     | 0.32915100  | 3.02567100  | 0.58039300  |
| H   | -2.19531600 | 4.75600600  | -1.53453500 | C     | 1.39326800  | 2.89616400  | -0.34208100 |
| C   | -3.40480800 | 0.42211700  | 2.14486200  | C     | 2.15027200  | 4.03841200  | -0.66381700 |
| H   | -1.82328900 | -1.02550000 | 2.53262900  | C     | 1.90308200  | 5.27998800  | -0.09352400 |
| H   | -4.70757600 | 2.01624100  | 1.53813900  |       |             |             |             |

|   |             |             |             |       |             |             |             |
|---|-------------|-------------|-------------|-------|-------------|-------------|-------------|
| H | 0.60790400  | 6.37765700  | 1.24327500  | O     | -0.46242500 | -1.64140800 | -0.94922200 |
| H | -0.77744800 | 4.43956000  | 1.77336800  | C     | -2.28583000 | -3.12551100 | -0.44443600 |
| H | 2.94842100  | 3.92081700  | -1.38656600 | H     | -3.03760000 | -2.63243200 | -1.06837700 |
| H | 2.52107800  | 6.13287100  | -0.35708200 | H     | -1.83290300 | -3.92261700 | -1.04052700 |
| C | 1.89920900  | 1.66656000  | -1.07524000 | H     | -2.77058100 | -3.54359300 | 0.43872000  |
| O | 2.30275700  | 1.82109900  | -2.23167900 | Co    | 0.45107800  | -0.40026800 | 0.49201300  |
| N | 2.01369300  | 0.50362700  | -0.35305800 | O     | -6.32297500 | -1.07772400 | -1.21590300 |
| C | -1.37667300 | 1.41129000  | -0.20281800 | C     | -7.13601500 | -1.62421500 | -0.18392900 |
| C | -2.64196200 | 0.74041400  | -0.33834300 | H     | -7.43755100 | -0.85755600 | 0.54028300  |
| C | -3.14817800 | 0.59829200  | -1.66031100 | H     | -8.02478800 | -2.01899000 | -0.67875500 |
| C | -3.42945500 | 0.18680500  | 0.69782300  | H     | -6.62452000 | -2.43964900 | 0.34226800  |
| C | -4.36343300 | -0.00123100 | -1.92191900 |       |             |             |             |
| H | -2.55699300 | 0.98160600  | -2.48669600 | TS2_S |             |             |             |
| C | -4.65605700 | -0.41846300 | 0.44637400  | C     | 0.39175600  | 5.36679300  | 0.90076700  |
| H | -3.06653400 | 0.17290400  | 1.71431200  | C     | -0.16892200 | 4.14855900  | 1.27268600  |
| C | -5.14069600 | -0.51004800 | -0.86562600 | C     | 0.22562400  | 2.93248100  | 0.69134900  |
| H | -4.73814000 | -0.09276000 | -2.93595300 | C     | 1.20441500  | 2.96045300  | -0.33053900 |
| H | -5.21563200 | -0.83347200 | 1.27560600  | C     | 1.75053500  | 4.20302000  | -0.69674600 |
| C | 3.03245500  | -0.40346300 | -0.65536400 | C     | 1.36790000  | 5.39327200  | -0.09045500 |
| C | 2.98544700  | -1.65324800 | 0.05496900  | H     | 0.05453700  | 6.28299200  | 1.37607200  |
| C | 4.13254800  | -0.19340500 | -1.48718600 | H     | -0.96209900 | 4.15191500  | 2.01000400  |
| C | 4.03079600  | -2.61702400 | -0.05727600 | H     | 2.49330300  | 4.20125900  | -1.48421500 |
| C | 5.16536900  | -1.14891100 | -1.58965200 | H     | 1.82170200  | 6.33019000  | -0.39876100 |
| H | 4.18654600  | 0.71463400  | -2.06886000 | C     | 1.82305900  | 1.80319500  | -1.09681400 |
| C | 1.77510000  | -3.02556900 | 1.50112100  | O     | 2.41133100  | 2.07566500  | -2.15016300 |
| C | 3.88875900  | -3.81488400 | 0.68641200  | N     | 1.83922200  | 0.55718800  | -0.51932700 |
| C | 5.13740300  | -2.33960500 | -0.89598600 | C     | -1.08609800 | 0.94244300  | -0.07157900 |
| H | 6.00299700  | -0.92946100 | -2.24575900 | C     | -2.47106100 | 0.44005400  | -0.23289500 |
| C | 2.77156300  | -4.02082000 | 1.46556900  | C     | -3.02539800 | 0.50372900  | -1.52910400 |
| H | 0.85881300  | -3.15643900 | 2.06829400  | C     | -3.26938000 | -0.14171200 | 0.76473900  |
| H | 4.67049100  | -4.56714000 | 0.62637500  | C     | -4.30316900 | 0.04464800  | -1.80907700 |
| H | 5.93533800  | -3.06954900 | -0.98907700 | H     | -2.42972200 | 0.92600000  | -2.33344200 |
| H | 2.64103100  | -4.93230600 | 2.03825400  | C     | -4.56099500 | -0.59997700 | 0.50489100  |
| N | 1.88922600  | -1.89132500 | 0.82843500  | H     | -2.87422800 | -0.29825400 | 1.75825200  |
| C | -0.68226600 | 1.95924000  | 0.91963700  | C     | -5.09029400 | -0.50604900 | -0.78792800 |
| C | -0.10917800 | 0.91454900  | 2.43402100  | H     | -4.71420800 | 0.10547200  | -2.81143700 |
| C | -1.16670200 | 1.95732800  | 2.33754500  | H     | -5.13340000 | -1.04310600 | 1.31064600  |
| H | 0.88771800  | 1.22467600  | 2.72853600  | C     | 2.91255900  | -0.30758600 | -0.78223700 |
| H | -0.42246000 | -0.10072800 | 2.65456500  | C     | 2.95661800  | -1.47302500 | 0.05494600  |
| H | -2.18285400 | 1.61329200  | 2.48966200  | C     | 3.97458800  | -0.13748900 | -1.67225500 |
| H | -0.98110200 | 2.86786600  | 2.89945000  | C     | 4.05248300  | -2.38236700 | 0.03538100  |
| H | -0.91052400 | 1.64874900  | -1.15466600 | C     | 5.05758300  | -1.04488900 | -1.69124700 |
| C | -1.24075700 | -2.11121000 | -0.06248800 | H     | 3.96506700  | 0.70200100  | -2.34800100 |
| O | -1.14177300 | -1.69902900 | 1.14058500  | C     | 1.84616800  | -2.71848600 | 1.68333800  |

|       |             |             |             |    |             |             |             |
|-------|-------------|-------------|-------------|----|-------------|-------------|-------------|
| C     | 3.98968200  | -3.48648400 | 0.92109200  | N  | 1.97778300  | 0.51980700  | -0.48800100 |
| C     | 5.12150800  | -2.14331700 | -0.86237200 | C  | -1.13938000 | 1.19536100  | -0.14067400 |
| H     | 5.86212500  | -0.85983200 | -2.39753300 | C  | -2.48461800 | 0.65267900  | -0.29055500 |
| C     | 2.89847800  | -3.65314900 | 1.74576900  | C  | -3.00106900 | 0.61380600  | -1.60836800 |
| H     | 0.94898700  | -2.83030800 | 2.28286800  | C  | -3.30376300 | 0.13131100  | 0.72859600  |
| H     | 4.80989000  | -4.19882800 | 0.93476400  | C  | -4.26454300 | 0.12693100  | -1.88666500 |
| H     | 5.95876600  | -2.83321800 | -0.89608300 | H  | -2.38334100 | 0.97996500  | -2.42282300 |
| H     | 2.82924000  | -4.49157900 | 2.42992600  | C  | -4.57898700 | -0.35932300 | 0.46479000  |
| N     | 1.88548100  | -1.67366800 | 0.87180000  | H  | -2.93567900 | 0.04667600  | 1.73980500  |
| C     | -0.56112800 | 1.71100200  | 1.07956700  | C  | -5.07330000 | -0.36083800 | -0.84682800 |
| C     | 0.19835400  | 0.78532900  | 2.36569100  | H  | -4.64953200 | 0.10889500  | -2.90065100 |
| C     | -1.03581400 | 1.63224200  | 2.48315500  | H  | -5.16783000 | -0.75648500 | 1.28207200  |
| H     | 1.14811000  | 1.21362800  | 2.66110200  | C  | 2.93090300  | -0.46203100 | -0.76370800 |
| H     | 0.05843600  | -0.26937900 | 2.58320700  | C  | 2.83461400  | -1.64046400 | 0.05704800  |
| H     | -1.96015700 | 1.10103300  | 2.66962800  | C  | 3.99889200  | -0.40125700 | -1.65876300 |
| H     | -0.93661000 | 2.52763100  | 3.08526400  | C  | 3.81969500  | -2.66902600 | 0.00373800  |
| H     | -0.76466500 | 1.40158900  | -1.00295900 | C  | 4.96554300  | -1.43007700 | -1.71247300 |
| C     | -1.02192200 | -2.32236500 | -0.31825800 | H  | 4.08062900  | 0.45217200  | -2.31395500 |
| O     | -0.99929900 | -1.89095700 | 0.88805600  | C  | 1.62103600  | -2.78433500 | 1.68417500  |
| O     | -0.27457200 | -1.75714800 | -1.17900000 | C  | 3.64983000  | -3.77476900 | 0.87212400  |
| C     | -1.95768200 | -3.42641500 | -0.70948500 | C  | 4.90106700  | -2.54253400 | -0.90354400 |
| H     | -2.93996800 | -2.98199200 | -0.90575400 | H  | 5.78214200  | -1.32862200 | -2.42192200 |
| H     | -1.61151200 | -3.92594300 | -1.61583700 | C  | 2.56242200  | -3.83154300 | 1.71589000  |
| H     | -2.06579100 | -4.14401800 | 0.10696900  | H  | 0.72392100  | -2.81042800 | 2.29270500  |
| Co    | 0.36229700  | -0.38804800 | 0.32849700  | H  | 4.38600200  | -4.57380700 | 0.85909900  |
| O     | -6.33524200 | -0.92405100 | -1.14864400 | H  | 5.65028200  | -3.32637700 | -0.95493100 |
| C     | -7.16119100 | -1.49854200 | -0.14524900 | H  | 2.41077400  | -4.66761400 | 2.38958300  |
| H     | -7.36375600 | -0.78991900 | 0.66779300  | N  | 1.75697500  | -1.73597800 | 0.88701100  |
| H     | -8.10083800 | -1.75516500 | -0.63766500 | C  | -0.48653500 | 1.80880200  | 0.99015600  |
| H     | -6.71546000 | -2.40980600 | 0.27367600  | C  | 0.11166200  | 0.66234700  | 2.33382900  |
|       |             |             |             | C  | -0.93271000 | 1.72760800  | 2.41319800  |
| TS2_T |             |             |             | H  | 1.11549200  | 0.91641400  | 2.65564900  |
| C     | 0.78646200  | 5.35565300  | 0.91440400  | H  | -0.22836800 | -0.35248200 | 2.52441200  |
| C     | 0.12171900  | 4.17675700  | 1.23509600  | H  | -1.94690000 | 1.38977000  | 2.58936700  |
| C     | 0.44703000  | 2.94166800  | 0.64507300  | H  | -0.68230200 | 2.58311200  | 3.03059400  |
| C     | 1.46839200  | 2.91861300  | -0.33592100 | H  | -0.73318600 | 1.53616700  | -1.08815400 |
| C     | 2.11952200  | 4.12396400  | -0.65172700 | C  | -1.22346400 | -2.19404900 | -0.13848200 |
| C     | 1.80361800  | 5.32788200  | -0.03525200 | O  | -1.21416600 | -1.88518900 | 1.08513300  |
| H     | 0.49912200  | 6.28467900  | 1.39740100  | O  | -0.49091800 | -1.56261800 | -0.97685500 |
| H     | -0.69970000 | 4.22802700  | 1.93946900  | C  | -2.14123900 | -3.27279000 | -0.65665300 |
| H     | 2.89095100  | 4.08036700  | -1.41043800 | H  | -3.05249500 | -2.79427000 | -1.03246600 |
| H     | 2.33988600  | 6.23335800  | -0.30236500 | H  | -1.67779800 | -3.81097400 | -1.48662200 |
| C     | 2.03283400  | 1.73557700  | -1.10550700 | H  | -2.41633500 | -3.96483900 | 0.14141600  |
| O     | 2.59726300  | 1.96989000  | -2.18145100 | Co | 0.35241100  | -0.28241800 | 0.37207100  |

|     |             |             |             |     |             |             |             |
|-----|-------------|-------------|-------------|-----|-------------|-------------|-------------|
| O   | -6.29793100 | -0.81864500 | -1.20943000 | H   | -5.35980800 | -3.90323200 | -0.71471600 |
| C   | -7.14303000 | -1.35229100 | -0.19588200 | H   | -0.99187500 | -5.20212800 | 0.96249400  |
| H   | -7.38441700 | -0.59999500 | 0.56492800  | N   | -1.35191100 | -1.93196300 | 0.32695800  |
| H   | -8.06048300 | -1.65873000 | -0.70070500 | C   | 0.52473000  | 1.74523300  | -0.68927100 |
| H   | -6.68883200 | -2.22579600 | 0.28769900  | C   | -0.00531700 | -0.48311000 | -1.59174300 |
| 6_S |             |             |             | C   | 0.18335700  | 0.98458900  | -1.97513300 |
| C   | -0.37132600 | 5.19067400  | 0.57538500  | H   | -0.77586700 | -0.99149900 | -2.17350200 |
| C   | 0.32817200  | 4.07490100  | 0.12945000  | H   | 0.91678000  | -1.06862900 | -1.57366300 |
| C   | -0.32610600 | 2.88357700  | -0.24279500 | H   | 0.95468200  | 1.15159400  | -2.73888400 |
| C   | -1.73435000 | 2.85269000  | -0.19332000 | H   | -0.74290200 | 1.38597100  | -2.38763800 |
| C   | -2.42807700 | 3.99447800  | 0.23727000  | H   | 1.69947000  | 2.05364000  | 0.99043400  |
| C   | -1.76383200 | 5.14803000  | 0.63722200  | C   | 0.68459700  | -0.56716900 | 2.36192300  |
| H   | 0.16807500  | 6.09082200  | 0.85513200  | O   | -0.38180000 | 0.09470400  | 2.45802400  |
| H   | 1.40809600  | 4.12429700  | 0.03602500  | O   | 1.06010800  | -0.98379900 | 1.20147900  |
| H   | -3.51044200 | 3.94975800  | 0.24899200  | C   | 1.51943000  | -0.91940900 | 3.56374500  |
| H   | -2.32888500 | 6.01034500  | 0.97784700  | H   | 1.14691500  | -1.85907400 | 3.98821700  |
| C   | -2.63089400 | 1.70908800  | -0.59914100 | H   | 2.56412200  | -1.06244400 | 3.28146700  |
| O   | -3.71837800 | 2.01621600  | -1.10946500 | H   | 1.42924500  | -0.14516600 | 4.32843400  |
| N   | -2.24406000 | 0.42522100  | -0.32048500 | Co  | -0.50061700 | -0.24248000 | 0.25412000  |
| C   | 1.66451800  | 1.52105300  | 0.04270200  | O   | 6.51150900  | -1.29871500 | -0.49658600 |
| C   | 2.88052300  | 0.76079300  | -0.20681300 | C   | 6.91647400  | -1.90863600 | -1.71775100 |
| C   | 3.78394700  | 0.63564300  | 0.87349600  | H   | 7.03494100  | -1.16757100 | -2.51748400 |
| C   | 3.25809200  | 0.17388000  | -1.42669600 | H   | 7.88197700  | -2.37441400 | -1.51459800 |
| C   | 4.97681100  | -0.05184200 | 0.75555400  | H   | 6.20442000  | -2.67882800 | -2.03781900 |
| H   | 3.52600500  | 1.09035000  | 1.82575300  | 6_T |             |             |             |
| C   | 4.45942100  | -0.51686400 | -1.56509400 | C   | -0.27245800 | 5.14696100  | 0.89049600  |
| H   | 2.62036900  | 0.25501800  | -2.29502000 | C   | 0.47693800  | 4.11093400  | 0.34847500  |
| C   | 5.32519200  | -0.64258800 | -0.47043500 | C   | -0.11716500 | 2.94295100  | -0.17533700 |
| H   | 5.66108300  | -0.14535400 | 1.59218400  | C   | -1.52974600 | 2.87523600  | -0.18739200 |
| H   | 4.71053900  | -0.94973400 | -2.52547000 | C   | -2.27464500 | 3.94473600  | 0.33650400  |
| C   | -3.15023500 | -0.62531000 | -0.50181600 | C   | -1.66472100 | 5.06128700  | 0.89467700  |
| C   | -2.64356300 | -1.90321600 | -0.11285800 | H   | 0.22836600  | 6.02624200  | 1.28477900  |
| C   | -4.46589500 | -0.59566900 | -0.97426400 | H   | 1.55536200  | 4.21069900  | 0.29387600  |
| C   | -3.42077400 | -3.09406000 | -0.18402700 | H   | -3.35637400 | 3.88022900  | 0.29646800  |
| C   | -5.23985700 | -1.77542600 | -1.03845500 | H   | -2.26933700 | 5.86478400  | 1.30391200  |
| H   | -4.88889100 | 0.34417700  | -1.28563000 | C   | -2.40877000 | 1.78781600  | -0.76961300 |
| C   | -0.78513900 | -3.07682900 | 0.68979700  | O   | -3.28408100 | 2.14720600  | -1.56349600 |
| C   | -2.80032000 | -4.30054800 | 0.22027700  | N   | -2.25626400 | 0.50715200  | -0.28840200 |
| C   | -4.75219800 | -3.00588500 | -0.65651300 | C   | 1.94404900  | 1.65166300  | -0.02202200 |
| H   | -6.25819200 | -1.69432600 | -1.40797400 | C   | 3.09215700  | 0.78519400  | -0.27359600 |
| C   | -1.49277200 | -4.29194200 | 0.65287800  | C   | 3.99252900  | 0.59780300  | 0.80000800  |
| H   | 0.24649700  | -3.01721000 | 1.01072700  | C   | 3.40293300  | 0.13490200  | -1.48033200 |
| H   | -3.36706600 | -5.22622800 | 0.17908500  | C   | 5.10999600  | -0.21066800 | 0.69127600  |

|    |             |             |             |     |             |             |             |
|----|-------------|-------------|-------------|-----|-------------|-------------|-------------|
| H  | 3.79325400  | 1.09960300  | 1.74300000  | 8_Q |             |             |             |
| C  | 4.52883500  | -0.67600400 | -1.61015000 | C   | 2.64529400  | -4.37004100 | -0.44592400 |
| H  | 2.77416900  | 0.26063800  | -2.35079700 | C   | 1.46586200  | -3.65047800 | -0.61796400 |
| C  | 5.38717200  | -0.86364800 | -0.51978800 | C   | 1.48365000  | -2.27339300 | -0.89893300 |
| H  | 5.78876200  | -0.35011600 | 1.52621800  | C   | 2.73673000  | -1.62151100 | -1.00750000 |
| H  | 4.72646400  | -1.15315300 | -2.56227200 | C   | 3.91302200  | -2.36436700 | -0.86549300 |
| C  | -3.24628600 | -0.46646500 | -0.51219800 | C   | 3.87621700  | -3.72556000 | -0.57583400 |
| C  | -2.93758300 | -1.80148900 | -0.06962600 | H   | 2.60201800  | -5.43349000 | -0.23065100 |
| C  | -4.51558900 | -0.26799400 | -1.05554900 | H   | 0.50897400  | -4.16006900 | -0.56626900 |
| C  | -3.88695900 | -2.86127500 | -0.16785800 | H   | 4.85922800  | -1.84520100 | -0.97328700 |
| C  | -5.45287700 | -1.32170400 | -1.14364700 | H   | 4.80153500  | -4.28057900 | -0.45505100 |
| H  | -4.78134500 | 0.71278400  | -1.41505600 | C   | 2.90304600  | -0.13567800 | -1.24291900 |
| C  | -1.34107500 | -3.22847200 | 0.86251600  | O   | 3.79105200  | 0.25715900  | -2.00972100 |
| C  | -3.48448700 | -4.13837000 | 0.29361900  | N   | 2.03773000  | 0.63167200  | -0.52193600 |
| C  | -5.16629400 | -2.59715400 | -0.71504400 | C   | -0.84260800 | -1.78862600 | -0.23483500 |
| H  | -6.42776200 | -1.10226700 | -1.56937000 | C   | -2.25468400 | -1.38393300 | -0.32716200 |
| C  | -2.21982800 | -4.32666400 | 0.80783800  | C   | -2.97489200 | -1.13938300 | 0.86065900  |
| H  | -0.32963500 | -3.31806700 | 1.24521900  | C   | -2.94801600 | -1.27605700 | -1.54291400 |
| H  | -4.18776800 | -4.96427300 | 0.23287000  | C   | -4.30731100 | -0.75986400 | 0.82896000  |
| H  | -5.89232700 | -3.40032100 | -0.79228700 | H   | -2.45923000 | -1.22511900 | 1.81069900  |
| H  | -1.89168900 | -5.29648200 | 1.16467900  | C   | -4.29271500 | -0.90874500 | -1.58771900 |
| N  | -1.69526600 | -2.02359500 | 0.44395700  | H   | -2.45128700 | -1.51843700 | -2.47328200 |
| C  | 0.78409600  | 1.88037100  | -0.69689200 | C   | -4.97752400 | -0.63358200 | -0.39803200 |
| C  | 0.10307600  | -0.35990100 | -1.54267200 | H   | -4.85559300 | -0.55896000 | 1.74369500  |
| C  | 0.34449700  | 1.08629300  | -1.92291100 | H   | -4.79252400 | -0.84656200 | -2.54642300 |
| H  | -0.66255000 | -0.88408900 | -2.11421400 | C   | 1.96035600  | 2.01511500  | -0.63410700 |
| H  | 0.99203300  | -0.96146900 | -1.36228600 | C   | 0.94928700  | 2.64035100  | 0.17973000  |
| H  | 1.09859800  | 1.16436700  | -2.71754700 | C   | 2.72745000  | 2.84618100  | -1.44877300 |
| H  | -0.56323100 | 1.52312200  | -2.34014500 | C   | 0.73361700  | 4.04815800  | 0.14104200  |
| H  | 2.04268200  | 2.19628500  | 0.91310300  | C   | 2.51020600  | 4.24176300  | -1.47483600 |
| C  | 0.94256900  | -0.71744000 | 2.19757500  | H   | 3.49529000  | 2.39859300  | -2.06193700 |
| O  | -0.01505700 | 0.11035700  | 2.33127800  | C   | -0.76816200 | 2.35125000  | 1.74339200  |
| O  | 1.09067700  | -1.29989500 | 1.07555700  | C   | -0.29658900 | 4.56959700  | 0.96128700  |
| C  | 1.86101000  | -1.02924700 | 3.34745200  | C   | 1.54086900  | 4.84782300  | -0.70651300 |
| H  | 1.40475300  | -1.81348500 | 3.96264100  | H   | 3.13425500  | 4.84638000  | -2.12680800 |
| H  | 2.82418300  | -1.38913000 | 2.98285900  | C   | -1.04634300 | 3.73050400  | 1.75772800  |
| H  | 1.99440600  | -0.14635100 | 3.97644800  | H   | -1.31755100 | 1.64536700  | 2.35691700  |
| Co | -0.59308700 | -0.27870100 | 0.36097900  | H   | -0.48596000 | 5.63943800  | 0.95101400  |
| O  | 6.50305800  | -1.63847700 | -0.53772500 | H   | 1.38124200  | 5.92100500  | -0.73738000 |
| C  | 6.82670200  | -2.31723700 | -1.74523100 | H   | -1.83984600 | 4.11045000  | 2.39120300  |
| H  | 7.01396900  | -1.61376200 | -2.56593100 | N   | 0.18841200  | 1.83538900  | 0.98393000  |
| H  | 7.73991100  | -2.87810500 | -1.53970200 | C   | 0.18211700  | -1.56831700 | -1.11560300 |
| H  | 6.03393200  | -3.01569500 | -2.04016300 | C   | -0.73123500 | 0.50066000  | -2.32513400 |
|    |             |             |             | C   | 0.05181600  | -0.76331600 | -2.40302800 |

|       |             |             |             |       |             |             |             |
|-------|-------------|-------------|-------------|-------|-------------|-------------|-------------|
| H     | -1.09931700 | 0.96465200  | -3.23337200 | C     | -0.00330700 | 2.51309000  | -0.32113200 |
| H     | -0.83485600 | 1.04194900  | -1.39411800 | C     | -1.21527100 | 2.37640500  | 0.44270600  |
| H     | -0.37487800 | -1.43027400 | -3.16932400 | C     | 0.09470100  | 3.63191700  | -1.14596500 |
| H     | 1.06116300  | -0.54952700 | -2.78072000 | C     | -2.24847600 | 3.36035600  | 0.38593300  |
| H     | -0.60811800 | -2.38933000 | 0.64164000  | C     | -0.93885800 | 4.59109500  | -1.21369100 |
| C     | 0.63252800  | -1.10743500 | 3.12009300  | H     | 0.99023400  | 3.77410300  | -1.73071600 |
| O     | 1.68686800  | -1.04071400 | 2.39252100  | C     | -2.43171200 | 1.09953700  | 1.97623100  |
| O     | -0.46041900 | -0.66843900 | 2.66721000  | C     | -3.39068500 | 3.15247600  | 1.19671600  |
| C     | 0.73697000  | -1.69388000 | 4.50351300  | C     | -2.08912900 | 4.48118700  | -0.46424600 |
| H     | 1.33329000  | -1.02447300 | 5.13272800  | H     | -0.80779900 | 5.44126600  | -1.87683900 |
| H     | -0.25049800 | -1.82277700 | 4.94837800  | C     | -3.48228500 | 2.03531200  | 1.99891700  |
| H     | 1.26038500  | -2.65319100 | 4.46244900  | H     | -2.47287600 | 0.19243700  | 2.57221000  |
| Co    | 0.79442100  | -0.12210800 | 0.83955600  | H     | -4.19046600 | 3.88749600  | 1.17676600  |
| O     | -6.28142400 | -0.25524100 | -0.32807200 | H     | -2.87189800 | 5.23153400  | -0.51205000 |
| C     | -7.00270400 | -0.11508700 | -1.54579900 | H     | -4.34464700 | 1.86045100  | 2.63227400  |
| H     | -7.06437700 | -1.06531100 | -2.09076800 | N     | -1.35224600 | 1.26503600  | 1.22643800  |
| H     | -8.00861000 | 0.20195100  | -1.26545900 | C     | 1.76259300  | -1.06151400 | -1.48467000 |
| H     | -6.55325600 | 0.64601400  | -2.19564300 | C     | -0.13513300 | -0.09148700 | -2.95488900 |
|       |             |             |             | C     | 1.32255400  | -0.30106700 | -2.73644100 |
| TS3_Q |             |             |             | H     | -0.71139600 | 0.51447400  | -2.26687300 |
| C     | 5.32024800  | -1.29375400 | -0.19735000 | H     | -0.64010100 | -0.49392700 | -3.82398700 |
| C     | 4.10833500  | -1.61597200 | -0.80412300 | H     | 1.75608000  | -0.83988200 | -3.59042800 |
| C     | 3.07151700  | -0.67715000 | -0.89424100 | H     | 1.83622000  | 0.66998900  | -2.72232100 |
| C     | 3.26301800  | 0.61686300  | -0.36599600 | H     | 1.54554400  | -2.51729900 | -0.01380200 |
| C     | 4.49644900  | 0.93258300  | 0.22007100  | C     | 0.75818000  | -1.82195900 | 2.82142900  |
| C     | 5.51393300  | -0.01200100 | 0.31970600  | O     | 1.12910200  | -0.76131100 | 2.25674300  |
| H     | 6.11070500  | -2.03627000 | -0.13739700 | O     | -0.23708200 | -2.53212000 | 2.41044600  |
| H     | 3.95328700  | -2.60439700 | -1.22640600 | C     | 1.50412100  | -2.33284700 | 4.02175000  |
| H     | 4.63847200  | 1.93928300  | 0.59696700  | H     | 0.80596100  | -2.72463600 | 4.76495700  |
| H     | 6.45585300  | 0.25349100  | 0.79034600  | H     | 2.15001700  | -3.15914700 | 3.70418000  |
| C     | 2.26400100  | 1.75330900  | -0.43974800 | H     | 2.12304900  | -1.54451600 | 4.45072100  |
| O     | 2.71922900  | 2.87929600  | -0.67547900 | Co    | 0.06385100  | -0.11501000 | 0.65265500  |
| N     | 0.93795000  | 1.47972600  | -0.19577200 | O     | -4.51216300 | -2.61791600 | -1.34282800 |
| C     | 1.06727600  | -2.04238000 | -0.87002800 | C     | -5.35786700 | -2.06327100 | -0.34627400 |
| C     | -0.37963700 | -2.32757200 | -1.03573200 | H     | -5.20131500 | -2.53951000 | 0.63021600  |
| C     | -1.15183500 | -1.80020400 | 0.02336600  | H     | -5.20978700 | -0.98004300 | -0.24527600 |
| C     | -0.98534600 | -2.94514300 | -2.13586500 | H     | -6.38073500 | -2.25487700 | -0.67584400 |
| C     | -2.55394500 | -1.87893900 | -0.07156300 |       |             |             |             |
| H     | -0.63013500 | -2.10622800 | 1.39638000  | TS3_S |             |             |             |
| C     | -2.37101300 | -3.03592800 | -2.19650300 | C     | 4.38024100  | -3.44654900 | -0.01242100 |
| H     | -0.38107900 | -3.34131900 | -2.94701300 | C     | 3.05192400  | -3.25099800 | -0.37957800 |
| C     | -3.16354200 | -2.49207900 | -1.17207900 | C     | 2.51356400  | -1.96047200 | -0.50159500 |
| H     | -3.16526900 | -1.46699100 | 0.72461100  | C     | 3.32724100  | -0.84423600 | -0.24875400 |
| H     | -2.86784600 | -3.51232000 | -3.03583300 | C     | 4.66362700  | -1.05836200 | 0.12255000  |

|   |             |             |             |       |             |             |             |
|---|-------------|-------------|-------------|-------|-------------|-------------|-------------|
| C | 5.18913500  | -2.33961800 | 0.24685800  | O     | 0.64668100  | -0.10048900 | 2.03917400  |
| H | 4.77682500  | -4.45383500 | 0.07367600  | O     | -1.40170400 | -0.54775100 | 2.82110800  |
| H | 2.41128900  | -4.10390000 | -0.58282100 | C     | 0.30290600  | -0.03100300 | 4.40521700  |
| H | 5.27643600  | -0.18418500 | 0.30561600  | H     | -0.08227200 | 0.93116100  | 4.76097700  |
| H | 6.22574300  | -2.47385100 | 0.54103300  | H     | -0.09869500 | -0.80982100 | 5.05805100  |
| C | 2.91970900  | 0.60055300  | -0.38985600 | H     | 1.39220800  | -0.01534600 | 4.45151300  |
| O | 3.84111700  | 1.42508400  | -0.49333800 | Co    | -0.03223400 | -0.06548000 | 0.08783400  |
| N | 1.59367400  | 0.94638200  | -0.40614100 | O     | -5.28593200 | -1.88486200 | -1.03471400 |
| C | 0.19137000  | -2.38691500 | 0.04045500  | C     | -5.99438400 | -0.73945500 | -0.58146200 |
| C | -1.27533600 | -2.40110600 | -0.17298800 | H     | -6.01480700 | -0.68343200 | 0.51427500  |
| C | -1.89607800 | -1.25509400 | 0.34061200  | H     | -5.56456800 | 0.18710300  | -0.98322800 |
| C | -1.95931300 | -3.31965300 | -0.97468300 | H     | -7.01504600 | -0.84996400 | -0.95182100 |
| C | -3.25811800 | -1.05215500 | 0.04864400  |       |             |             |             |
| H | -1.54517600 | -0.78350200 | 1.61745100  | TS3_T |             |             |             |
| C | -3.30845400 | -3.11676200 | -1.23551300 | C     | 4.34486400  | -3.44952700 | 0.35768400  |
| H | -1.44318000 | -4.17586000 | -1.40043400 | C     | 3.03942200  | -3.35107300 | -0.11131900 |
| C | -3.96358500 | -1.98343600 | -0.72150100 | C     | 2.47321300  | -2.11123300 | -0.45334100 |
| H | -3.77800100 | -0.18025700 | 0.42659300  | C     | 3.25551100  | -0.94400600 | -0.34016200 |
| H | -3.87952500 | -3.81396500 | -1.83996100 | C     | 4.57699100  | -1.06500200 | 0.12021900  |
| C | 1.25854400  | 2.28229400  | -0.65179900 | C     | 5.11679700  | -2.29389500 | 0.48296200  |
| C | -0.05390200 | 2.65350800  | -0.23557000 | H     | 4.75778100  | -4.42063200 | 0.61427900  |
| C | 2.02671300  | 3.27881000  | -1.25973200 | H     | 2.43706200  | -4.24598000 | -0.23322300 |
| C | -0.54045000 | 3.98873400  | -0.34308700 | H     | 5.17659200  | -0.16443400 | 0.18195000  |
| C | 1.52560800  | 4.58852300  | -1.41676200 | H     | 6.13837200  | -2.35061900 | 0.84659900  |
| H | 3.02612100  | 3.04907500  | -1.58961300 | C     | 2.87003400  | 0.46887900  | -0.73917100 |
| C | -2.00341800 | 1.95083400  | 0.83219200  | O     | 3.75803900  | 1.10916300  | -1.32100200 |
| C | -1.82214500 | 4.25933100  | 0.19327300  | N     | 1.64072700  | 0.96695400  | -0.38390300 |
| C | 0.28025900  | 4.96248300  | -0.95971200 | C     | 0.13158000  | -2.67277000 | -0.06621600 |
| H | 2.16295800  | 5.32374500  | -1.89963400 | C     | -1.33110500 | -2.50867500 | -0.26960700 |
| C | -2.53609000 | 3.25275200  | 0.80302500  | C     | -1.87914100 | -1.30335000 | 0.21885200  |
| H | -2.53780000 | 1.14421400  | 1.30853000  | C     | -2.10452300 | -3.39954000 | -1.02515400 |
| H | -2.22095500 | 5.26760700  | 0.12987100  | C     | -3.22191900 | -1.01253000 | -0.09168600 |
| H | -0.07975200 | 5.98166300  | -1.05652500 | H     | -1.63329300 | -0.85388400 | 1.57855200  |
| H | -3.50700600 | 3.43381700  | 1.24990600  | C     | -3.42982400 | -3.09769000 | -1.31188300 |
| N | -0.82327300 | 1.65950000  | 0.30057600  | H     | -1.66501000 | -4.31574900 | -1.41036600 |
| C | 1.07471600  | -1.85420300 | -0.84950000 | C     | -3.99543800 | -1.89712800 | -0.84900700 |
| C | -0.39671800 | -0.14967400 | -1.83372000 | H     | -3.66408000 | -0.09185300 | 0.27176200  |
| C | 0.61476800  | -1.24500100 | -2.18042000 | H     | -4.04753900 | -3.76920600 | -1.89953500 |
| H | -0.16234600 | 0.80729300  | -2.29986200 | C     | 1.34498400  | 2.32517200  | -0.58366800 |
| H | -1.43222000 | -0.42165200 | -2.03410300 | C     | 0.05149500  | 2.77726900  | -0.12528200 |
| H | 0.20166600  | -2.03357300 | -2.82080300 | C     | 2.17136600  | 3.30263700  | -1.14752800 |
| H | 1.48841200  | -0.83120000 | -2.68753200 | C     | -0.33221300 | 4.15167900  | -0.20533800 |
| H | 0.58290500  | -2.75757500 | 0.98599900  | C     | 1.77586500  | 4.65500900  | -1.23522600 |
| C | -0.16349900 | -0.24360300 | 2.98789900  | H     | 3.14071800  | 3.00732900  | -1.51120100 |



|     |             |             |             |     |             |             |             |
|-----|-------------|-------------|-------------|-----|-------------|-------------|-------------|
| C   | -1.97850700 | 2.21914000  | 0.88513600  | O   | -2.25634600 | 1.54018500  | -2.15895500 |
| C   | -1.60394000 | 4.50902100  | 0.30434200  | N   | -0.88078900 | 1.17626200  | -0.32876600 |
| C   | 0.55707200  | 5.09397000  | -0.77491500 | C   | -1.18793000 | -2.02234600 | -0.85849200 |
| H   | 2.47130000  | 5.36093800  | -1.68045900 | C   | 0.24089600  | -2.38651300 | -0.85585100 |
| C   | -2.42391200 | 3.55315100  | 0.86102400  | C   | 1.07954900  | -1.57366400 | -0.05982700 |
| H   | -2.58569300 | 1.43354600  | 1.32003400  | C   | 0.79597100  | -3.38368400 | -1.67520800 |
| H   | -1.91525100 | 5.54868800  | 0.25427200  | C   | 2.46159800  | -1.79884800 | -0.06839000 |
| H   | 0.26348400  | 6.13712900  | -0.83766900 | C   | 2.16463800  | -3.61209200 | -1.66089400 |
| H   | -3.39545500 | 3.80489300  | 1.27127900  | H   | 0.15568000  | -3.98950300 | -2.31190600 |
| N   | -0.80264600 | 1.85308700  | 0.39888200  | C   | 3.00495700  | -2.82357800 | -0.85448500 |
| C   | 1.04754900  | -2.07224900 | -0.86085600 | H   | 3.11229300  | -1.16100900 | 0.52112400  |
| C   | -0.32646100 | -0.18599900 | -1.88071500 | H   | 2.61396200  | -4.38916100 | -2.27080700 |
| C   | 0.63539200  | -1.33698600 | -2.15053500 | C   | 0.01270800  | 2.21201900  | -0.62137600 |
| H   | -0.01667500 | 0.77913900  | -2.27360800 | C   | 1.16189600  | 2.30224100  | 0.24474200  |
| H   | -1.37608700 | -0.38933300 | -2.06709500 | C   | -0.10187700 | 3.19311600  | -1.60866800 |
| H   | 0.17352900  | -2.07086100 | -2.82185500 | C   | 2.11756800  | 3.35438500  | 0.11451100  |
| H   | 1.53811900  | -0.96697400 | -2.63996500 | C   | 0.84649100  | 4.23159500  | -1.72787200 |
| H   | 0.47741100  | -3.18490600 | 0.83046300  | H   | -0.93312300 | 3.14311100  | -2.29345800 |
| C   | -0.34610700 | -0.39821300 | 3.01572900  | C   | 2.36007200  | 1.35683700  | 2.02001100  |
| O   | 0.53477600  | -0.26994800 | 2.13005000  | C   | 3.21259700  | 3.35575700  | 1.01274900  |
| O   | -1.58108300 | -0.64178500 | 2.74320400  | C   | 1.93783500  | 4.33131200  | -0.89437500 |
| C   | 0.01592200  | -0.24569800 | 4.46763400  | H   | 0.70104000  | 4.96790300  | -2.51322500 |
| H   | -0.35978900 | 0.72066500  | 4.82207200  | C   | 3.33665200  | 2.36725400  | 1.96515200  |
| H   | -0.46425800 | -1.02607000 | 5.06265900  | H   | 2.42294700  | 0.54827500  | 2.74224300  |
| H   | 1.09811400  | -0.27478700 | 4.59587000  | H   | 3.95289200  | 4.14716000  | 0.93553200  |
| Co  | -0.02104300 | -0.04746700 | 0.16455100  | H   | 2.66442400  | 5.13063000  | -1.00029600 |
| O   | -5.29984800 | -1.69504000 | -1.18908200 | H   | 4.16741400  | 2.35139300  | 2.66154400  |
| C   | -5.91282200 | -0.48191900 | -0.77480300 | N   | 1.32197300  | 1.33467300  | 1.19555600  |
| H   | -6.93372000 | -0.51251500 | -1.15949000 | C   | -1.94083300 | -1.81301700 | 0.25236800  |
| H   | -5.94409700 | -0.39684800 | 0.31881500  | C   | -1.03357700 | -1.06178500 | 2.44983600  |
| H   | -5.39786300 | 0.39385600  | -1.19024500 | C   | -1.53308900 | -2.26351600 | 1.65754700  |
|     |             |             |             | H   | -1.81205200 | -0.37209400 | 2.78273700  |
| 7_Q |             |             |             | H   | -0.30586900 | -1.28529900 | 3.23346400  |
| C   | -5.57115000 | -0.81433600 | 0.64948400  | H   | -0.74991700 | -3.02079500 | 1.58375200  |
| C   | -4.38018000 | -1.52813800 | 0.71075000  | H   | -2.40176900 | -2.72919600 | 2.14420600  |
| C   | -3.18874700 | -1.01771900 | 0.16727800  | H   | -1.63198400 | -1.76679400 | -1.82103200 |
| C   | -3.20185300 | 0.26018700  | -0.43449200 | Co  | -0.03722100 | -0.17413600 | 0.86722400  |
| C   | -4.42021400 | 0.95775400  | -0.50874600 | O   | 4.33296100  | -3.12661200 | -0.92454700 |
| C   | -5.58985400 | 0.43977000  | 0.03520400  | C   | 5.23299600  | -2.35073100 | -0.14695700 |
| H   | -6.47973100 | -1.23568200 | 1.06921300  | H   | 5.21193500  | -1.29267300 | -0.43762500 |
| H   | -4.36917500 | -2.51491000 | 1.16388500  | H   | 5.01667600  | -2.43309400 | 0.92603600  |
| H   | -4.42868700 | 1.92344700  | -1.00143200 | H   | 6.22792300  | -2.75525900 | -0.34242800 |
| H   | -6.51219900 | 1.00996900  | -0.02207700 |     |             |             |             |
| C   | -2.03694300 | 1.01109300  | -1.06467100 | 7_S |             |             |             |

|   |             |             |             |     |             |             |             |
|---|-------------|-------------|-------------|-----|-------------|-------------|-------------|
| C | -4.73187600 | -2.80738400 | 0.91610500  | H   | 0.38815800  | -2.75766900 | 1.83506100  |
| C | -3.34494900 | -2.80928700 | 1.01436200  | H   | -1.18820700 | -2.39820800 | 2.58478800  |
| C | -2.56466100 | -1.81582400 | 0.39927400  | H   | -0.95692600 | -2.22794900 | -1.62634200 |
| C | -3.20471100 | -0.77823100 | -0.30908500 | Co  | 0.14109300  | -0.12454700 | 0.25848700  |
| C | -4.60677100 | -0.80390300 | -0.41338800 | O   | 5.20893000  | -2.07929500 | -0.76026500 |
| C | -5.36694200 | -1.79832200 | 0.18969800  | C   | 5.91150500  | -1.09101000 | -0.02114600 |
| H | -5.31057300 | -3.59259400 | 1.39339000  | H   | 5.67690200  | -0.07840800 | -0.37361300 |
| H | -2.84568300 | -3.61115600 | 1.55043800  | H   | 5.69537000  | -1.15795000 | 1.05275600  |
| H | -5.08043300 | -0.00825700 | -0.97598100 | H   | 6.97244900  | -1.28870900 | -0.18480400 |
| H | -6.44896300 | -1.78328600 | 0.09983100  |     |             |             |             |
| C | -2.56146100 | 0.44438300  | -0.93168400 | 7_T |             |             |             |
| O | -3.17155800 | 1.00824000  | -1.84943000 | C   | -5.33450700 | -1.54446700 | 0.92007800  |
| N | -1.40537400 | 0.92102200  | -0.35947700 | C   | -4.06277700 | -2.10538100 | 0.92204600  |
| C | -0.38553500 | -2.16948500 | -0.69986600 | C   | -2.98093000 | -1.47059100 | 0.28777900  |
| C | 1.08083000  | -2.23761300 | -0.76623500 | C   | -3.18888800 | -0.22277800 | -0.33827900 |
| C | 1.69094700  | -1.20564100 | -0.02566100 | C   | -4.48651900 | 0.31749700  | -0.35504900 |
| C | 1.83492900  | -3.13443800 | -1.53960000 | C   | -5.54739500 | -0.32400900 | 0.27434000  |
| C | 3.08897700  | -1.13107200 | 0.00214500  | H   | -6.15686900 | -2.05944200 | 1.40778100  |
| C | 3.21823500  | -3.05489400 | -1.50084100 | H   | -3.90003500 | -3.06921600 | 1.39565800  |
| H | 1.34653800  | -3.89472200 | -2.14442800 | H   | -4.64577900 | 1.26035700  | -0.86670600 |
| C | 3.84641100  | -2.06246100 | -0.72229500 | H   | -6.53619800 | 0.12468000  | 0.26044900  |
| H | 3.59730400  | -0.34449400 | 0.54513800  | C   | -2.15753000 | 0.65044400  | -1.03605100 |
| H | 3.84279200  | -3.74103600 | -2.06313500 | O   | -2.45517700 | 1.06744000  | -2.15862000 |
| C | -1.05052500 | 2.26199600  | -0.51822600 | N   | -1.04445100 | 1.04649500  | -0.31379100 |
| C | 0.20231200  | 2.60305900  | 0.08420200  | C   | -0.93415500 | -2.21819200 | -0.85788500 |
| C | -1.77337400 | 3.30526600  | -1.09864100 | C   | 0.52433300  | -2.41588600 | -0.87110600 |
| C | 0.66955200  | 3.94548500  | 0.16187500  | C   | 1.28847900  | -1.57397000 | -0.03767800 |
| C | -1.29585000 | 4.63385200  | -1.04602500 | C   | 1.19192300  | -3.32034400 | -1.71488500 |
| H | -2.70808100 | 3.08569600  | -1.59061600 | C   | 2.68079300  | -1.68714200 | 0.01314800  |
| C | 2.05098600  | 1.81105700  | 1.27004700  | C   | 2.57449800  | -3.43327900 | -1.67522900 |
| C | 1.88877400  | 4.16979000  | 0.84452500  | H   | 0.61943000  | -3.95157600 | -2.38982900 |
| C | -0.10990600 | 4.97039000  | -0.42967800 | C   | 3.32633300  | -2.62470400 | -0.80592100 |
| H | -1.89812800 | 5.41131800  | -1.50747600 | H   | 3.25700500  | -1.02804000 | 0.65203800  |
| C | 2.56638400  | 3.11127300  | 1.41103200  | H   | 3.10060800  | -4.13987000 | -2.30864800 |
| H | 2.55343700  | 0.95620100  | 1.70184200  | C   | -0.44456800 | 2.28074900  | -0.59042800 |
| H | 2.27259000  | 5.18270000  | 0.92509400  | C   | 0.74010500  | 2.59629000  | 0.16918500  |
| H | 0.23910800  | 5.99719200  | -0.39067400 | C   | -0.90452400 | 3.27361100  | -1.45837100 |
| H | 3.49213500  | 3.25800600  | 1.95570600  | C   | 1.38147300  | 3.86763300  | 0.06545400  |
| N | 0.92589100  | 1.56562000  | 0.60986700  | C   | -0.26394300 | 4.52744500  | -1.55584100 |
| C | -1.09079700 | -1.98037100 | 0.46476500  | H   | -1.76626800 | 3.06838300  | -2.07424400 |
| C | 0.04173900  | -0.64311900 | 2.10617900  | C   | 2.31608100  | 1.86352600  | 1.73226600  |
| C | -0.44864500 | -2.05477000 | 1.85329100  | C   | 2.52978500  | 4.08474900  | 0.86421200  |
| H | -0.71262600 | 0.01939000  | 2.54155700  | C   | 0.85488000  | 4.84140300  | -0.81728500 |
| H | 0.98725400  | -0.57373200 | 2.64638500  | H   | -0.67646100 | 5.25932800  | -2.24458900 |

|             |             |             |             |             |             |             |             |
|-------------|-------------|-------------|-------------|-------------|-------------|-------------|-------------|
| C           | 2.99728000  | 3.09307900  | 1.70026800  | H           | 6.81395300  | -0.20959000 | 1.05396900  |
| H           | 2.65504000  | 1.04843600  | 2.36541000  | H           | 4.48018200  | -2.38362100 | -1.83059900 |
| H           | 3.03579700  | 5.04436100  | 0.80626000  | C           | -2.87624000 | -0.43985400 | -1.22601400 |
| H           | 1.34297500  | 5.80688000  | -0.90371800 | C           | -2.95233000 | -1.63649900 | -0.43689400 |
| H           | 3.87330700  | 3.24096100  | 2.32166700  | C           | -3.75237400 | -0.33242100 | -2.30688200 |
| N           | 1.23709500  | 1.63108000  | 0.99770800  | C           | -3.88664300 | -2.67085800 | -0.72552300 |
| C           | -1.64410200 | -2.09767100 | 0.28777400  | C           | -4.67702900 | -1.36257600 | -2.58774400 |
| C           | -0.30232900 | -1.25537600 | 2.20614400  | H           | -3.71493900 | 0.55170100  | -2.92337700 |
| C           | -1.03834800 | -2.45988800 | 1.64097400  | C           | -2.09596600 | -2.81344400 | 1.39230000  |
| H           | -0.95961600 | -0.51927400 | 2.69044500  | C           | -3.87738500 | -3.80688700 | 0.12246000  |
| H           | 0.54858500  | -1.49955100 | 2.84553100  | C           | -4.76047700 | -2.51060300 | -1.82917000 |
| H           | -0.33903900 | -3.28940400 | 1.51314400  | H           | -5.34187200 | -1.23342900 | -3.43711400 |
| H           | -1.83233500 | -2.79076300 | 2.32173800  | C           | -2.99143100 | -3.87923200 | 1.17485500  |
| H           | -1.43275800 | -2.03527900 | -1.80842600 | H           | -1.38109500 | -2.81888200 | 2.20815200  |
| Co          | 0.22045300  | -0.13306600 | 0.69584300  | H           | -4.57779200 | -4.61456100 | -0.07023800 |
| O           | 4.67572500  | -2.81016400 | -0.84930900 | H           | -5.47634300 | -3.29259700 | -2.06159800 |
| C           | 5.48498200  | -2.01419500 | 0.00457200  | H           | -2.96875000 | -4.73754300 | 1.83692300  |
| H           | 5.38562800  | -0.94518800 | -0.22350100 | N           | -2.08192000 | -1.74345900 | 0.61287300  |
| H           | 5.24410500  | -2.18141100 | 1.06230200  | C           | 1.48282500  | 1.64858300  | -0.38056400 |
| H           | 6.51519700  | -2.32413000 | -0.17989200 | C           | 0.75214200  | -0.96034500 | -0.07445000 |
|             |             |             |             | C           | 0.69209700  | 0.38825800  | -0.50344400 |
| TS3_betaH_S |             |             |             | H           | 0.51828100  | -1.73041200 | -0.80265300 |
| C           | 0.28520500  | 5.19973000  | 0.22726800  | H           | 1.37612100  | -1.25961300 | 0.76129100  |
| C           | 1.07015400  | 4.06319900  | 0.10036000  | H           | 0.16538000  | 0.44074500  | -1.45112700 |
| C           | 0.56683300  | 2.83552200  | -0.37110400 | H           | -0.10153100 | 1.02218800  | 0.56891800  |
| C           | -0.82167800 | 2.77512000  | -0.73252900 | H           | 3.27839800  | 2.70441300  | -0.24529300 |
| C           | -1.58537600 | 3.95103500  | -0.60831100 | C           | -1.23702700 | 0.17271600  | 3.03349800  |
| C           | -1.06257900 | 5.14219000  | -0.12333100 | O           | -2.05336100 | 0.69214500  | 2.21578200  |
| H           | 0.72128400  | 6.11753300  | 0.60993700  | O           | -0.26804500 | -0.51352300 | 2.54468500  |
| H           | 2.10691300  | 4.11760000  | 0.41104400  | C           | -1.36400900 | 0.36083900  | 4.51614600  |
| H           | -2.62432000 | 3.91266700  | -0.91457900 | H           | -1.13692600 | -0.57300600 | 5.03653200  |
| H           | -1.70099300 | 6.01479100  | -0.02586400 | H           | -0.63567400 | 1.11137500  | 4.84283200  |
| C           | -1.68574600 | 1.67436500  | -1.40468200 | H           | -2.36634700 | 0.70650900  | 4.77340500  |
| O           | -2.21453400 | 2.00515900  | -2.47156900 | Co          | -0.93128600 | -0.16805900 | 0.72138200  |
| N           | -1.93509400 | 0.48062400  | -0.76929900 | O           | 6.74158700  | -2.35690800 | -0.28615000 |
| C           | 2.82915100  | 1.71768700  | -0.32415400 | C           | 6.61675300  | -3.52946000 | -1.08066900 |
| C           | 3.80278000  | 0.61943000  | -0.35688500 | H           | 5.71544800  | -4.09879800 | -0.82142100 |
| C           | 4.96979400  | 0.72026500  | 0.42710500  | H           | 6.59952600  | -3.29239700 | -2.15177700 |
| C           | 3.66696600  | -0.51316800 | -1.17264200 | H           | 7.49765200  | -4.13586400 | -0.86324600 |
| C           | 5.92399500  | -0.28466900 | 0.43789900  |             |             |             |             |
| H           | 5.11575700  | 1.59900200  | 1.04937900  | TS3_betaH_T |             |             |             |
| C           | 4.62108100  | -1.53000000 | -1.17892700 | C           | 0.36822800  | 5.08086600  | 0.11392100  |
| H           | 2.81419800  | -0.59668200 | -1.83578900 | C           | 1.13242700  | 3.92361500  | 0.06318500  |
| C           | 5.75353500  | -1.42543700 | -0.36164300 | C           | 0.63039800  | 2.71108700  | -0.44958300 |

|   |             |             |             |                  |             |             |             |
|---|-------------|-------------|-------------|------------------|-------------|-------------|-------------|
| C | -0.71858800 | 2.68818300  | -0.90789300 | H                | 3.28169400  | 2.57552600  | -0.55438300 |
| C | -1.46818200 | 3.87468000  | -0.85782900 | C                | -1.27215700 | 0.32716700  | 3.31951400  |
| C | -0.94816000 | 5.05765100  | -0.34803000 | O                | -1.57954600 | 1.14999700  | 2.38535000  |
| H | 0.79223000  | 5.98992400  | 0.52942500  | O                | -0.75789100 | -0.78832000 | 3.03986600  |
| H | 2.13875100  | 3.94221900  | 0.46644500  | C                | -1.52981200 | 0.73989400  | 4.74848200  |
| H | -2.48550100 | 3.85457300  | -1.23540400 | H                | -1.35739900 | -0.09257500 | 5.43208500  |
| H | -1.56486600 | 5.95021500  | -0.30871400 | H                | -0.86148900 | 1.56720500  | 5.01008000  |
| C | -1.48814800 | 1.56227200  | -1.61246900 | H                | -2.55539000 | 1.10550200  | 4.85212600  |
| O | -1.67205100 | 1.70064400  | -2.82588700 | Co               | -1.08651100 | -0.09793300 | 0.85229900  |
| N | -1.99757700 | 0.55837000  | -0.82949700 | O                | 6.89145800  | -2.36659400 | -0.26511600 |
| C | 2.85481500  | 1.57922100  | -0.46653800 | C                | 6.73234700  | -3.64259700 | -0.87287500 |
| C | 3.85224700  | 0.50263900  | -0.44467100 | H                | 5.88856000  | -4.19378400 | -0.43948300 |
| C | 5.09330400  | 0.74499700  | 0.17856600  | H                | 6.59129000  | -3.55838100 | -1.95760900 |
| C | 3.66965600  | -0.74608000 | -1.05763700 | H                | 7.65620200  | -4.18815600 | -0.67363800 |
| C | 6.07989600  | -0.22653600 | 0.23186300  |                  |             |             |             |
| H | 5.27401700  | 1.71238700  | 0.63930900  | 6_Co(IV)_doublet |             |             |             |
| C | 4.65614500  | -1.73063700 | -1.02235000 | C                | -0.44243600 | 5.00509000  | -0.24671200 |
| H | 2.75511400  | -0.95080600 | -1.60148100 | C                | 0.30725100  | 3.88177000  | -0.57452300 |
| C | 5.86695100  | -1.47891000 | -0.36470600 | C                | -0.29071500 | 2.62906100  | -0.83514300 |
| H | 7.02853300  | -0.03923900 | 0.72398000  | C                | -1.69887800 | 2.55792000  | -0.82709500 |
| H | 4.47746400  | -2.67628200 | -1.51941400 | C                | -2.44412800 | 3.70470100  | -0.50845600 |
| C | -2.90145600 | -0.37881700 | -1.33265000 | C                | -1.83364500 | 4.91240800  | -0.19559500 |
| C | -3.09555700 | -1.55308700 | -0.52460800 | H                | 0.05741700  | 5.94869500  | -0.04878100 |
| C | -3.66435700 | -0.27655800 | -2.49613100 | H                | 1.38473600  | 3.97057200  | -0.65937300 |
| C | -4.04600700 | -2.55370200 | -0.88532300 | H                | -3.52378900 | 3.61824100  | -0.51195900 |
| C | -4.60104300 | -1.27266500 | -2.84695700 | H                | -2.43741000 | 5.77704200  | 0.06220700  |
| H | -3.52393000 | 0.58161600  | -3.13564100 | C                | -2.55016500 | 1.36375100  | -1.17917900 |
| C | -2.48042300 | -2.74171400 | 1.39769700  | O                | -3.58815100 | 1.59585200  | -1.81551300 |
| C | -4.17554100 | -3.66982900 | -0.02312200 | N                | -2.17801000 | 0.13084300  | -0.72743700 |
| C | -4.80437900 | -2.39247700 | -2.07098300 | C                | 1.77267900  | 1.44403900  | -0.37143900 |
| H | -5.17385600 | -1.13981600 | -3.76030800 | C                | 3.02439000  | 0.71457200  | -0.49842500 |
| C | -3.40290400 | -3.76565600 | 1.11383100  | C                | 4.00150300  | 0.96953000  | 0.49352200  |
| H | -1.85342000 | -2.75599900 | 2.28231900  | C                | 3.37754200  | -0.18601200 | -1.52126400 |
| H | -4.89397800 | -4.44574100 | -0.27260600 | C                | 5.24242900  | 0.35938800  | 0.47786100  |
| H | -5.52622200 | -3.15349700 | -2.34995700 | H                | 3.76363300  | 1.66205900  | 1.29537600  |
| H | -3.49076100 | -4.60898600 | 1.78944800  | C                | 4.62192900  | -0.80771100 | -1.55130800 |
| N | -2.33418400 | -1.68655200 | 0.60733900  | H                | 2.68175900  | -0.41859800 | -2.31283600 |
| C | 1.50739600  | 1.50350200  | -0.39908800 | C                | 5.56503300  | -0.54358900 | -0.54780500 |
| C | 0.97366400  | -0.86195800 | 0.59518400  | H                | 5.98058300  | 0.56234100  | 1.24637900  |
| C | 0.78764400  | 0.18977800  | -0.29939200 | H                | 4.84758600  | -1.49356600 | -2.35828300 |
| H | 0.76595200  | -1.88155900 | 0.28946100  | C                | -3.05814900 | -0.94694500 | -0.83355400 |
| H | 1.50857400  | -0.71871600 | 1.52688000  | C                | -2.59155500 | -2.13819100 | -0.20079300 |
| H | 0.32192400  | -0.09997700 | -1.24022000 | C                | -4.31806100 | -1.00924000 | -1.43478300 |
| H | -0.24154200 | 1.03401900  | 0.50018900  | C                | -3.36385500 | -3.33306400 | -0.14843200 |

|                  |             |             |             |   |             |             |             |
|------------------|-------------|-------------|-------------|---|-------------|-------------|-------------|
| C                | -5.08319400 | -2.19524400 | -1.38626500 | C | 0.25694400  | 2.58671500  | -0.86485800 |
| H                | -4.70606200 | -0.13389500 | -1.92770700 | C | -1.13272900 | 2.41011300  | -1.08630100 |
| C                | -0.83205200 | -3.13422000 | 0.97445600  | C | -2.02821400 | 3.47256500  | -0.86407200 |
| C                | -2.79644600 | -4.44404500 | 0.52021000  | C | -1.59491900 | 4.70400400  | -0.39770800 |
| C                | -4.63986300 | -3.34035900 | -0.76116800 | H | 0.14816700  | 5.87437300  | 0.11206500  |
| H                | -6.05917700 | -2.18953500 | -1.86318200 | H | 1.72639800  | 4.08171600  | -0.36887700 |
| C                | -1.54242500 | -4.34384600 | 1.08059500  | H | -3.08275500 | 3.29750500  | -1.03964500 |
| H                | 0.16443800  | -3.01274400 | 1.37511200  | H | -2.30855100 | 5.50084100  | -0.21369200 |
| H                | -3.36116800 | -5.36984300 | 0.58126200  | C | -1.83021200 | 1.21823200  | -1.68229300 |
| H                | -5.24293600 | -4.24207000 | -0.72981000 | O | -2.40665700 | 1.35008400  | -2.75371100 |
| H                | -1.08397200 | -5.17901700 | 1.59775700  | N | -1.87807900 | 0.02768700  | -0.92364200 |
| N                | -1.34799300 | -2.07882800 | 0.35800300  | C | 2.48051000  | 1.65387700  | -0.40447400 |
| C                | 0.61640200  | 1.47692000  | -1.10771600 | C | 3.62632400  | 0.73021500  | -0.43608000 |
| C                | 0.10704500  | -0.88968100 | -1.66443000 | C | 4.21755100  | 0.34781500  | 0.78598100  |
| C                | 0.32097400  | 0.50547800  | -2.25400600 | C | 4.20568400  | 0.24566600  | -1.61647600 |
| H                | -0.63334900 | -1.47912500 | -2.20651700 | C | 5.30254900  | -0.51455800 | 0.82332000  |
| H                | 1.02198200  | -1.46328300 | -1.51160700 | H | 3.79216700  | 0.72965000  | 1.70805500  |
| H                | 1.13508400  | 0.54296400  | -2.99073700 | C | 5.30333000  | -0.61677300 | -1.59535100 |
| H                | -0.57810100 | 0.83198900  | -2.77714600 | H | 3.81685400  | 0.57047500  | -2.57654400 |
| H                | 1.79311100  | 2.13437000  | 0.46616000  | C | 5.85248300  | -1.00975800 | -0.36918200 |
| C                | 1.58055300  | -0.57324700 | 2.01805700  | H | 5.74921700  | -0.81521600 | 1.76570800  |
| O                | 1.15757000  | 0.45265500  | 2.60468400  | H | 5.72625200  | -0.95958400 | -2.53181100 |
| O                | 1.09391000  | -1.08235500 | 0.95184500  | C | -2.64775900 | -1.04645100 | -1.29875900 |
| C                | 2.75314800  | -1.31229300 | 2.63287600  | C | -2.67975900 | -2.12353600 | -0.34087400 |
| H                | 2.35320800  | -2.11688700 | 3.26130600  | C | -3.40867200 | -1.20362200 | -2.47177800 |
| H                | 3.37271900  | -1.75257700 | 1.85087100  | C | -3.45804500 | -3.28949500 | -0.55903000 |
| H                | 3.34770300  | -0.64879200 | 3.26158200  | C | -4.17279300 | -2.36455300 | -2.68101100 |
| Co               | -0.49990100 | -0.40037800 | 0.10080600  | H | -3.40767000 | -0.41730900 | -3.20838800 |
| O                | 6.79888900  | -1.10052200 | -0.48451200 | C | -1.91103400 | -2.91324300 | 1.70342800  |
| C                | 7.17703500  | -2.01768300 | -1.50696200 | C | -3.42978800 | -4.28466000 | 0.44627500  |
| H                | 7.17565400  | -1.54114500 | -2.49456400 | C | -4.21268500 | -3.39190100 | -1.75755700 |
| H                | 8.19169500  | -2.33587500 | -1.26329600 | H | -4.74681600 | -2.44431900 | -3.59847500 |
| H                | 6.51807400  | -2.89413000 | -1.52401200 | C | -2.66068600 | -4.09667700 | 1.57751300  |
| C                | -1.70578100 | 1.43065200  | 2.27009000  | H | -1.27200300 | -2.71887700 | 2.55828500  |
| O                | -2.92091300 | 1.35653100  | 2.15325700  | H | -4.01518800 | -5.18983200 | 0.31468000  |
| O                | -0.98813600 | 0.36188500  | 1.94445100  | H | -4.81300400 | -4.27876300 | -1.93450700 |
| C                | -0.96017500 | 2.63166500  | 2.77614800  | H | -2.62084600 | -4.84316900 | 2.36259300  |
| H                | -0.32965500 | 2.34985000  | 3.62253600  | N | -1.93161100 | -1.96661900 | 0.77344300  |
| H                | -0.30510200 | 3.01349000  | 1.98954000  | C | 1.29739500  | 1.54298300  | -1.05203400 |
| H                | -1.67299200 | 3.40377800  | 3.06771900  | C | 0.54894500  | -0.81333900 | -0.77926100 |
|                  |             |             |             | C | 0.94787900  | 0.25731500  | -1.77747500 |
| 6_Co(IV)_quartet |             |             |             | H | 0.08598900  | -1.69536900 | -1.22617900 |
| C                | -0.22610600 | 4.90716300  | -0.20996600 | H | 1.36733000  | -1.08009100 | -0.11242400 |
| C                | 0.66706500  | 3.87827300  | -0.46298800 | H | 1.82159800  | -0.11628700 | -2.31913900 |

|                 |             |             |             |    |             |             |             |
|-----------------|-------------|-------------|-------------|----|-------------|-------------|-------------|
| H               | 0.17860400  | 0.41387200  | -2.53629400 | H  | -2.95553600 | -0.17795100 | -2.63272500 |
| H               | 2.58799600  | 2.45567300  | 0.31643400  | C  | -5.39937100 | -0.55313000 | -0.31965700 |
| C               | 1.21322900  | -0.03445300 | 2.63312600  | H  | -5.19320300 | -1.57395200 | 1.55909400  |
| O               | 1.39752000  | 1.13968300  | 2.32435800  | H  | -5.29755600 | 0.35245800  | -2.28605100 |
| O               | 0.35262300  | -0.83800100 | 2.05547500  | C  | 1.52207000  | 2.14510700  | -0.75528800 |
| C               | 2.01531300  | -0.71231000 | 3.73255700  | C  | 0.77749600  | 2.71667000  | 0.35061500  |
| H               | 1.35954500  | -1.28789400 | 4.39195100  | C  | 1.96896000  | 3.03356100  | -1.76335000 |
| H               | 2.72373500  | -1.41414000 | 3.27818600  | C  | 0.50493400  | 4.10705600  | 0.41258400  |
| H               | 2.56796800  | 0.02911500  | 4.31172800  | C  | 1.69549500  | 4.40387100  | -1.68582300 |
| Co              | -0.78649400 | -0.22396500 | 0.67401200  | H  | 2.53135500  | 2.63531700  | -2.59298000 |
| O               | 6.91771300  | -1.84742000 | -0.23122100 | C  | -0.36711300 | 2.32401900  | 2.33537100  |
| C               | 7.52858800  | -2.34736000 | -1.41256300 | C  | -0.24109700 | 4.57739100  | 1.51833200  |
| H               | 7.92949200  | -1.53735700 | -2.03494600 | C  | 0.98115900  | 4.94755900  | -0.63036400 |
| H               | 8.35122000  | -2.98373200 | -1.08143100 | H  | 2.05367400  | 5.05156400  | -2.47954500 |
| H               | 6.82881300  | -2.94718100 | -2.00832200 | C  | -0.67851700 | 3.68682100  | 2.47804500  |
| C               | -2.97399100 | 1.48309200  | 1.53606200  | H  | -0.69154600 | 1.57281400  | 3.04727000  |
| O               | -3.69856600 | 1.19877500  | 0.57177000  | H  | -0.46407100 | 5.63742200  | 1.59669000  |
| O               | -1.76869900 | 1.05742300  | 1.74387000  | H  | 0.77527000  | 6.01250000  | -0.58707300 |
| C               | -3.46865400 | 2.45745100  | 2.59555200  | H  | -1.25572500 | 4.01742400  | 3.33391800  |
| H               | -3.26989400 | 2.06321400  | 3.59564000  | N  | 0.34015000  | 1.86561200  | 1.30581300  |
| H               | -2.90600800 | 3.39122200  | 2.49087700  | C  | -0.26586000 | -1.19579100 | -1.69262900 |
| H               | -4.53336200 | 2.65994600  | 2.47088100  | C  | -0.93868000 | 1.16482800  | -2.40314200 |
|                 |             |             |             | C  | -0.40276000 | -0.16841400 | -2.80454100 |
| 6_Co(IV)_sextet |             |             |             | H  | -1.08106100 | 1.93809700  | -3.15086700 |
| C               | 2.10964700  | -4.14420500 | -1.47598100 | H  | -1.23275800 | 1.37303100  | -1.38332400 |
| C               | 0.95056900  | -3.37586100 | -1.53457800 | H  | -1.03551200 | -0.60854000 | -3.59724400 |
| C               | 1.00471600  | -1.97363900 | -1.61321200 | H  | 0.56784800  | -0.03973400 | -3.30265300 |
| C               | 2.27902500  | -1.36631800 | -1.63736400 | H  | -0.96836900 | -2.27231800 | -0.06607100 |
| C               | 3.44215100  | -2.14394400 | -1.61594900 | C  | -0.66033000 | -1.93099000 | 2.65448500  |
| C               | 3.36279700  | -3.52960900 | -1.52245300 | O  | -0.37530400 | -2.88979300 | 1.93061200  |
| H               | 2.03324700  | -5.22509700 | -1.40676300 | O  | -0.40751300 | -0.68375600 | 2.37511500  |
| H               | -0.01959900 | -3.86080500 | -1.53660600 | C  | -1.38008100 | -2.13063200 | 3.97910200  |
| H               | 4.40075300  | -1.63790800 | -1.62803600 | H  | -0.75568100 | -1.75635600 | 4.79717900  |
| H               | 4.26940400  | -4.12543700 | -1.48307900 | H  | -2.30859600 | -1.54976900 | 3.98854200  |
| C               | 2.46216600  | 0.11400500  | -1.66009000 | H  | -1.60377100 | -3.18561100 | 4.14414700  |
| O               | 3.25543600  | 0.64238200  | -2.42797400 | Co | 0.88191300  | -0.13020200 | 1.02893400  |
| N               | 1.67924300  | 0.80230100  | -0.70978200 | O  | -6.69988800 | -0.29589700 | -0.02842600 |
| C               | -1.26215500 | -1.55726300 | -0.83120200 | C  | -7.47712800 | 0.40912000  | -0.98940600 |
| C               | -2.66293300 | -1.16444800 | -0.72682300 | H  | -7.54933200 | -0.14421500 | -1.93364700 |
| C               | -3.34745700 | -1.56806800 | 0.44508900  | H  | -8.47345700 | 0.50904400  | -0.55573500 |
| C               | -3.41335700 | -0.47749500 | -1.70032400 | H  | -7.06711700 | 1.40768300  | -1.18441300 |
| C               | -4.67999800 | -1.26420200 | 0.65473800  | C  | 3.74487900  | -0.55492400 | 1.38448500  |
| H               | -2.80597200 | -2.14438200 | 1.18693800  | O  | 4.06637900  | 0.31828300  | 0.56905100  |
| C               | -4.75859500 | -0.17279400 | -1.50702600 | O  | 2.53252700  | -0.82849700 | 1.75925500  |

|                    |             |             |             |                    |             |             |             |
|--------------------|-------------|-------------|-------------|--------------------|-------------|-------------|-------------|
| C                  | 4.80469100  | -1.43594100 | 2.02702800  | H                  | -2.97066800 | 3.57494100  | 1.95820400  |
| H                  | 4.67620800  | -1.44991100 | 3.11322600  | N                  | -0.63559400 | 1.79193800  | 0.34760500  |
| H                  | 4.67178600  | -2.46276800 | 1.66984600  | C                  | 0.71402800  | -1.82269100 | -1.41523000 |
| H                  | 5.80686700  | -1.08836800 | 1.77142700  | C                  | -0.48310600 | 0.23595900  | -2.14843100 |
| TS3_Co(IV)_doublet |             |             |             | C                  | 0.33080100  | -0.96921400 | -2.64527600 |
| C                  | 3.88933600  | -3.62613300 | -0.44820500 | H                  | -0.13094900 | 1.18741600  | -2.54923700 |
| C                  | 2.56505000  | -3.36157700 | -0.78605000 | H                  | -1.55737100 | 0.14244600  | -2.29453400 |
| C                  | 2.13554100  | -2.05690700 | -1.07017400 | H                  | -0.22546500 | -1.58171800 | -3.36185000 |
| C                  | 3.07034700  | -1.00776500 | -1.00792700 | H                  | 1.24579700  | -0.64621900 | -3.14669200 |
| C                  | 4.40758300  | -1.28666200 | -0.69366600 | H                  | 0.00972500  | -2.79787300 | 0.35645600  |
| C                  | 4.81668900  | -2.58376300 | -0.40468800 | C                  | -1.45921300 | -1.82128700 | 3.09554400  |
| H                  | 4.19661000  | -4.64372400 | -0.22744800 | O                  | -0.96470400 | -2.79973700 | 2.52281400  |
| H                  | 1.84542600  | -4.17147000 | -0.84728900 | O                  | -2.06686100 | -0.82455100 | 2.52853600  |
| H                  | 5.11328800  | -0.46489500 | -0.65611700 | C                  | -1.39153000 | -1.70352200 | 4.61771900  |
| H                  | 5.85249300  | -2.77987100 | -0.14638900 | H                  | -0.78473800 | -0.83312100 | 4.88993800  |
| C                  | 2.76962500  | 0.43307800  | -1.26635400 | H                  | -2.39194100 | -1.54108200 | 5.03210900  |
| O                  | 3.55742000  | 1.09953600  | -1.92623500 | H                  | -0.95273800 | -2.60198900 | 5.05634400  |
| N                  | 1.60362800  | 0.99894000  | -0.69221600 | Co                 | -0.05167500 | 0.07392200  | -0.20925300 |
| C                  | -0.25228900 | -2.33772600 | -0.59573100 | C                  | 1.78023700  | -0.14034700 | 2.04974600  |
| C                  | -1.68554300 | -2.07086200 | -0.84002000 | O                  | 2.64834500  | 0.58582000  | 1.51281500  |
| C                  | -2.19726600 | -1.02682600 | -0.05187700 | O                  | 0.62391400  | -0.42258500 | 1.59391500  |
| C                  | -2.41217200 | -2.59882400 | -1.91538600 | C                  | 2.09467900  | -0.75577700 | 3.40875900  |
| C                  | -3.46104500 | -0.49898100 | -0.38325800 | H                  | 1.73351700  | -0.07989600 | 4.19133800  |
| H                  | -1.92214400 | -0.90393400 | 1.20648900  | H                  | 1.56754100  | -1.70692200 | 3.50090400  |
| C                  | -3.66858900 | -2.08951200 | -2.20705000 | H                  | 3.17071200  | -0.88802000 | 3.53362700  |
| H                  | -1.98917800 | -3.38861200 | -2.52997500 | O                  | -5.43396400 | -0.60273200 | -1.82323400 |
| C                  | -4.19691700 | -1.02819700 | -1.44475700 | C                  | -6.00895800 | 0.48290700  | -1.10859100 |
| H                  | -3.87942400 | 0.30164000  | 0.21592300  | H                  | -6.16261100 | 0.23435300  | -0.05113200 |
| H                  | -4.26362900 | -2.48420400 | -3.02431300 | H                  | -5.38974500 | 1.38648900  | -1.18062900 |
| C                  | 1.45592800  | 2.37210800  | -0.61407000 | H                  | -6.97654000 | 0.67357500  | -1.57610200 |
| C                  | 0.22654900  | 2.78375900  | -0.00237600 | TS3_Co(IV)_quartet |             |             |             |
| C                  | 2.36836100  | 3.37906900  | -0.96484300 | C                  | 3.77540700  | -3.73231300 | -0.12075700 |
| C                  | -0.05461100 | 4.14298300  | 0.28380700  | C                  | 2.44928100  | -3.52994900 | -0.49160000 |
| C                  | 2.06584100  | 4.73209200  | -0.72408500 | C                  | 1.99529700  | -2.27726100 | -0.93139000 |
| H                  | 3.30776400  | 3.11135800  | -1.41889500 | C                  | 2.92117600  | -1.21509200 | -1.00456300 |
| C                  | -1.72489400 | 2.06984100  | 1.05875800  | C                  | 4.26099100  | -1.43630000 | -0.65658800 |
| C                  | -1.25275600 | 4.42826900  | 0.98026100  | C                  | 4.68844500  | -2.68013500 | -0.20402700 |
| C                  | 0.89138800  | 5.12411400  | -0.11283500 | H                  | 4.09587000  | -4.71122000 | 0.22245800  |
| H                  | 2.79380200  | 5.48106400  | -1.01839100 | H                  | 1.74319500  | -4.35289800 | -0.45454100 |
| C                  | -2.06830100 | 3.39321000  | 1.38618600  | H                  | 4.95883700  | -0.60905300 | -0.72231200 |
| H                  | -2.30523000 | 1.22674300  | 1.40608800  | H                  | 5.72658900  | -2.82717800 | 0.07640200  |
| H                  | -1.50167800 | 5.45946500  | 1.21155900  | C                  | 2.62254600  | 0.18431900  | -1.45811800 |
| H                  | 0.68440000  | 6.17111800  | 0.08382200  | O                  | 3.30277800  | 0.68546700  | -2.34554900 |

|    |             |             |             |       |             |             |             |
|----|-------------|-------------|-------------|-------|-------------|-------------|-------------|
| N  | 1.58143400  | 0.88309000  | -0.80671000 | C     | 1.96100800  | -0.26363900 | 1.95028600  |
| C  | -0.39333300 | -2.55245100 | -0.42670000 | O     | 2.68334000  | 0.63092300  | 1.47325900  |
| C  | -1.82563800 | -2.21610800 | -0.62558100 | O     | 0.83836700  | -0.66913100 | 1.47214400  |
| C  | -2.25900000 | -1.04198500 | 0.01977600  | C     | 2.43173500  | -1.01732100 | 3.18620200  |
| C  | -2.65016600 | -2.87432700 | -1.54661900 | H     | 2.83364500  | -0.32190200 | 3.92747700  |
| C  | -3.53053400 | -0.53145100 | -0.29883800 | H     | 1.61781400  | -1.60781800 | 3.60779000  |
| H  | -1.91929200 | -0.64714700 | 1.24073700  | H     | 3.24386000  | -1.68801000 | 2.88455900  |
| C  | -3.90737300 | -2.36198300 | -1.84382200 | O     | -5.59807200 | -0.76283400 | -1.58918400 |
| H  | -2.30118700 | -3.77241200 | -2.04918100 | C     | -6.10137400 | 0.42173400  | -0.98740400 |
| C  | -4.35285000 | -1.18073700 | -1.22490600 | H     | -6.18532000 | 0.31817100  | 0.10150500  |
| H  | -3.87772700 | 0.36383100  | 0.20538400  | H     | -5.47343200 | 1.29188800  | -1.21955500 |
| H  | -4.56375500 | -2.85442700 | -2.55408600 | H     | -7.09588100 | 0.57609800  | -1.40993600 |
| C  | 1.53203300  | 2.24910800  | -0.82194100 |       |             |             |             |
| C  | 0.35917600  | 2.82949100  | -0.21025600 |       |             |             |             |
| C  | 2.52491200  | 3.13156200  | -1.28979500 | TS4_T |             |             |             |
| C  | 0.21091300  | 4.23840100  | -0.10797900 | C     | -1.20758500 | 4.97214200  | -0.01959500 |
| C  | 2.36111600  | 4.52126000  | -1.19270500 | C     | -0.30434300 | 3.95104300  | -0.29709000 |
| H  | 3.42303100  | 2.72846700  | -1.73010100 | C     | -0.73574800 | 2.66051200  | -0.65630700 |
| C  | -1.64504600 | 2.46444400  | 0.91426000  | C     | -2.12764800 | 2.41779800  | -0.74548500 |
| C  | -0.95059300 | 4.73028200  | 0.53254000  | C     | -3.02271300 | 3.46518300  | -0.49576300 |
| C  | 1.23253000  | 5.07930800  | -0.62285000 | C     | -2.57750800 | 4.72908500  | -0.12156400 |
| H  | 3.14914600  | 5.16494000  | -1.56972200 | H     | -0.84135400 | 5.95718900  | 0.25390700  |
| C  | -1.87120300 | 3.84503100  | 1.05170600  | H     | 0.76114900  | 4.15475000  | -0.27028200 |
| H  | -2.30653800 | 1.72944600  | 1.35625400  | H     | -4.08276600 | 3.25864200  | -0.59274100 |
| H  | -1.09406700 | 5.80297500  | 0.62171500  | H     | -3.29334600 | 5.52006500  | 0.08040600  |
| H  | 1.11908800  | 6.15607200  | -0.54632400 | C     | -2.76988200 | 1.09001500  | -1.08664500 |
| H  | -2.75839800 | 4.19016400  | 1.57014600  | O     | -3.75999800 | 1.09519800  | -1.83124500 |
| N  | -0.57517400 | 1.98174100  | 0.28760700  | N     | -2.20546400 | 0.00552300  | -0.48513900 |
| C  | 0.56352400  | -2.10610400 | -1.27467300 | C     | 1.39920400  | 1.55136600  | -0.14177100 |
| C  | -0.52874000 | -0.03541800 | -2.19844700 | C     | 2.67844600  | 0.84651900  | -0.31101900 |
| C  | 0.18241300  | -1.32769300 | -2.54843300 | C     | 3.41036500  | 0.49992500  | 0.84524900  |
| H  | -0.11002500 | 0.87893300  | -2.60891100 | C     | 3.26454200  | 0.56072000  | -1.55448400 |
| H  | -1.61368000 | -0.05352000 | -2.21095800 | C     | 4.63991700  | -0.13050200 | 0.76162800  |
| H  | -0.46709700 | -1.95749400 | -3.16553000 | H     | 2.97401800  | 0.69948000  | 1.81696300  |
| H  | 1.08491400  | -1.12387300 | -3.12739300 | C     | 4.50712600  | -0.06332800 | -1.65443400 |
| H  | -0.10371600 | -3.01700700 | 0.51256300  | H     | 2.76381000  | 0.84449700  | -2.47111300 |
| C  | -1.40983800 | -0.97969700 | 3.31460800  | C     | 5.20083800  | -0.42175000 | -0.49188600 |
| O  | -1.27414600 | -2.19172900 | 3.15139000  | H     | 5.19109300  | -0.40635700 | 1.65463800  |
| O  | -1.90696700 | -0.14368900 | 2.44125300  | H     | 4.92302400  | -0.25774500 | -2.63534900 |
| C  | -0.97846200 | -0.30204600 | 4.61152500  | C     | -2.68441400 | -1.29005700 | -0.66690500 |
| H  | -0.11463600 | 0.34021000  | 4.40675700  | C     | -1.96610600 | -2.32331400 | 0.03646600  |
| H  | -1.77658300 | 0.34129000  | 4.99555600  | C     | -3.76538800 | -1.69365800 | -1.45100400 |
| H  | -0.70552500 | -1.04330800 | 5.36518400  | C     | -2.34767800 | -3.69319100 | -0.06445300 |
| Co | -0.14612900 | 0.00227200  | -0.06948800 | C     | -4.13637000 | -3.05363400 | -1.54287000 |



|         |             |             |             |   |             |             |             |
|---------|-------------|-------------|-------------|---|-------------|-------------|-------------|
| H       | -4.32026400 | -0.93920100 | -1.98703000 | C | -2.44226400 | 1.63659100  | -0.94266800 |
| C       | -0.19781800 | -2.85549600 | 1.47450500  | O | -3.36604800 | 1.92882700  | -1.71280300 |
| C       | -1.57957600 | -4.63772700 | 0.65963800  | N | -2.17506700 | 0.37966100  | -0.46655100 |
| C       | -3.45708600 | -4.04606400 | -0.87271700 | C | 1.80021200  | 1.42370200  | -0.07359600 |
| H       | -4.98811800 | -3.31147500 | -2.16595800 | C | 2.97362000  | 0.58534800  | -0.30989600 |
| C       | -0.51078400 | -4.22666100 | 1.42631700  | C | 3.79599800  | 0.30721200  | 0.80513000  |
| H       | 0.62503400  | -2.47042100 | 2.06720900  | C | 3.38788500  | 0.06709000  | -1.54908100 |
| H       | -1.84818600 | -5.68887600 | 0.60031200  | C | 4.94240600  | -0.45908500 | 0.69951700  |
| H       | -3.75089300 | -5.08814600 | -0.95017000 | H | 3.51391700  | 0.70602500  | 1.77452800  |
| H       | 0.08837700  | -4.93369200 | 1.98892700  | C | 4.54302200  | -0.70278800 | -1.67454600 |
| N       | -0.89730000 | -1.95164300 | 0.80362200  | H | 2.81858600  | 0.26686700  | -2.44632800 |
| C       | 0.30863100  | 1.63650700  | -0.96596900 | C | 5.32608300  | -0.97870700 | -0.54678000 |
| C       | 0.30769400  | -0.64438100 | -2.06131400 | H | 5.56186700  | -0.66987100 | 1.56494400  |
| C       | 0.14762600  | 0.82889300  | -2.25772700 | H | 4.82258000  | -1.07715100 | -2.65166200 |
| H       | -0.40272900 | -1.32745000 | -2.51062900 | C | -3.05005900 | -0.68519400 | -0.72502700 |
| H       | 1.20305600  | -1.05804000 | -1.61447300 | C | -2.73540500 | -1.89482000 | -0.02400700 |
| H       | 0.86286400  | 1.22024100  | -2.99958800 | C | -4.17363800 | -0.71067500 | -1.55099800 |
| H       | -0.83591700 | 1.03269600  | -2.68164700 | C | -3.53566600 | -3.06641000 | -0.13534900 |
| H       | 1.34794100  | 2.14041400  | 0.77107600  | C | -4.96542000 | -1.87719100 | -1.66206100 |
| C       | 0.04076200  | 0.69239100  | 3.04046600  | H | -4.43923300 | 0.17863400  | -2.09901700 |
| O       | -0.99641400 | 1.12068300  | 2.42484100  | C | -1.25216100 | -2.95096700 | 1.43889900  |
| O       | 0.83958300  | -0.08682200 | 2.44619200  | C | -3.12903500 | -4.20011700 | 0.60985600  |
| C       | 0.30726900  | 1.15902000  | 4.44840300  | C | -4.67510600 | -3.03619300 | -0.97746300 |
| H       | -0.62469100 | 1.20754000  | 5.01643700  | H | -5.83276500 | -1.84331400 | -2.31523000 |
| H       | 1.02303200  | 0.50290200  | 4.94616500  | C | -1.99682700 | -4.14460400 | 1.39433300  |
| H       | 0.72509700  | 2.17167300  | 4.41143600  | H | -0.34452100 | -2.85745300 | 2.02467300  |
| Co      | -0.60844800 | 0.07959900  | 0.72309400  | H | -3.71958300 | -5.11008300 | 0.55143300  |
| O       | 6.41033600  | -1.03942200 | -0.47370600 | H | -5.29411900 | -3.92269100 | -1.07264600 |
| C       | 7.02611600  | -1.34393500 | -1.71952200 | H | -1.66637600 | -5.00110700 | 1.97113500  |
| H       | 7.22944100  | -0.43646300 | -2.30129700 | N | -1.61667800 | -1.87344800 | 0.75747500  |
| H       | 7.97127400  | -1.83217300 | -1.47651200 | C | 0.69369100  | 1.70498400  | -0.81757400 |
| H       | 6.41113300  | -2.02800400 | -2.31714500 | C | 0.20666300  | -0.44459800 | -2.02153300 |
|         |             |             |             | C | 0.36991900  | 1.03696400  | -2.15299800 |
| TS4'_T' |             |             |             | H | -0.59189100 | -0.94988800 | -2.55302400 |
| C       | -0.33046200 | 5.04555000  | 0.63411000  | H | 1.00285200  | -1.05404600 | -1.60811200 |
| C       | 0.41626800  | 3.96919200  | 0.16795000  | H | 1.16051200  | 1.29615600  | -2.87651900 |
| C       | -0.19176600 | 2.80576800  | -0.34271600 | H | -0.54258800 | 1.46977700  | -2.56537600 |
| C       | -1.60142800 | 2.76877700  | -0.40538700 | H | 1.83432600  | 1.91897400  | 0.89327300  |
| C       | -2.34208300 | 3.87446800  | 0.03567100  | C | 0.58084200  | 0.02085800  | 2.62204700  |
| C       | -1.72308300 | 4.99889500  | 0.57061300  | O | -0.38602800 | 0.81514600  | 2.43820300  |
| H       | 0.17486500  | 5.92487700  | 1.02263900  | O | 0.86977400  | -0.81081300 | 1.68933000  |
| H       | 1.49929400  | 4.03188500  | 0.16530900  | C | 1.38073200  | 0.04162100  | 3.89583500  |
| H       | -3.42244800 | 3.82847700  | -0.04494700 | H | 0.72161900  | -0.17511900 | 4.74254300  |
| H       | -2.32085200 | 5.83578900  | 0.91860600  | H | 2.18988300  | -0.68901000 | 3.86425000  |

H 1.78950800 1.04446600 4.05389000  
Co -0.63359600 -0.16130100 0.56089400  
O 6.46336000 -1.72104100 -0.55784900  
C 6.89525800 -2.26644100 -1.79883400  
H 7.11327600 -1.47977800 -2.53157500  
H 7.81185000 -2.81755500 -1.58228700  
H 6.15112600 -2.95555700 -2.21683200

8\_OSS

C 3.39411800 -3.91671900 -0.32243300  
C 2.10412000 -3.43787200 -0.54002200  
C 1.87370600 -2.09103100 -0.86769600  
C 2.98752200 -1.22188200 -0.97457900  
C 4.27920400 -1.72282300 -0.78662700  
C 4.48773700 -3.05871400 -0.45323700  
H 3.54532800 -4.96232500 -0.07129600  
H 1.25728900 -4.11474800 -0.48564000  
H 5.11408600 -1.03846900 -0.89372300  
H 5.49640400 -3.42935300 -0.29844600  
C 2.84994500 0.25357700 -1.26663000  
O 3.63455800 0.80448800 -2.04860100  
N 1.83255600 0.84334100 -0.58183800  
C -0.50003200 -1.95987400 -0.23613900  
C -1.95095200 -1.73394100 -0.28487500  
C -2.63031400 -1.52748900 0.93411400  
C -2.71154400 -1.73157400 -1.46380800  
C -3.99319800 -1.27977300 0.96737800  
H -2.05962300 -1.54118300 1.85719200  
C -4.08681400 -1.49790900 -1.44331000  
H -2.23898800 -1.94494000 -2.41408800  
C -4.73325400 -1.25425300 -0.22537100  
H -4.51192500 -1.10732000 1.90486900  
H -4.63999700 -1.51182100 -2.37431400  
C 1.44064200 2.16310800 -0.76352200  
C 0.31242800 2.54399000 0.03217900  
C 1.97891400 3.11960200 -1.62124200  
C -0.26359600 3.84092500 -0.05224500  
C 1.41014900 4.41111100 -1.69380700  
H 2.83379000 2.85618000 -2.22609400  
C -1.25763100 1.85166300 1.61577200  
C -1.39605200 4.09594900 0.76152000  
C 0.31644300 4.78241800 -0.93933600  
H 1.85789400 5.13022800 -2.37391000  
C -1.89231600 3.10939600 1.58617300

H -1.60324300 1.04807300 2.25590300  
H -1.86512400 5.07504800 0.72394100  
H -0.10806200 5.77862300 -1.01323300  
H -2.75928600 3.28199200 2.21393000  
N -0.19942500 1.58607900 0.86389700  
C 0.47362700 -1.62654200 -1.13307800  
C -0.73800700 0.20008100 -2.46895700  
C 0.22948500 -0.93139300 -2.46543300  
H -1.12185400 0.57457900 -3.41156800  
H -0.98515500 0.73479800 -1.56340800  
H -0.08532300 -1.70392600 -3.18670300  
H 1.19580200 -0.58907100 -2.86212900  
H -0.16857300 -2.47255700 0.66335500  
C 1.15457600 -0.41196100 3.20143000  
O 2.08537200 0.21795400 2.63374100  
O 0.17450900 -0.84820400 2.48394800  
C 1.13682800 -0.65739900 4.68465600  
H 0.29025000 -0.12323100 5.12881900  
H 0.99117900 -1.72363600 4.88183200  
H 2.06481200 -0.31604800 5.14447800  
Co 0.89338000 -0.06003700 0.82558100  
O -6.06251100 -1.00027800 -0.09390100  
C -6.85442000 -0.95462500 -1.27431600  
H -6.85200900 -1.91722300 -1.80069700  
H -7.87066100 -0.72908400 -0.94664900  
H -6.51349600 -0.16749700 -1.95837100

8\_T

C 2.59038300 -4.40466100 -0.43012500  
C 1.42080400 -3.67003500 -0.60551300  
C 1.45707700 -2.29379400 -0.88901300  
C 2.71859100 -1.65852500 -0.99670000  
C 3.88487000 -2.41660200 -0.85172300  
C 3.82985000 -3.77657100 -0.55946800  
H 2.53282800 -5.46705200 -0.21303500  
H 0.45727000 -4.16699900 -0.55481000  
H 4.83795300 -1.91013800 -0.95926600  
H 4.74767600 -4.34339100 -0.43636100  
C 2.90515700 -0.17581000 -1.23579400  
O 3.79927600 0.20238400 -2.00293700  
N 2.04995000 0.60607500 -0.51829600  
C -0.86505800 -1.78091900 -0.23378000  
C -2.27284900 -1.36195100 -0.33101000  
C -2.99485500 -1.11318000 0.85474900

|    |             |             |             |      |             |             |             |
|----|-------------|-------------|-------------|------|-------------|-------------|-------------|
| C  | -2.96082600 | -1.24546800 | -1.54888100 | H    | -6.54910900 | 0.70694400  | -2.21052700 |
| C  | -4.32392200 | -0.72235800 | 0.81928900  |      |             |             |             |
| H  | -2.48251700 | -1.20414800 | 1.80611800  | 8_T' |             |             |             |
| C  | -4.30213200 | -0.86662000 | -1.59758400 | C    | 3.39884700  | -3.91253900 | -0.32113100 |
| H  | -2.46254200 | -1.48840800 | -2.47829800 | C    | 2.10801800  | -3.43621500 | -0.53952500 |
| C  | -4.98888300 | -0.58823300 | -0.40968100 | C    | 1.87535100  | -2.09014400 | -0.86856700 |
| H  | -4.87356000 | -0.51837500 | 1.73253000  | C    | 2.98759500  | -1.21905600 | -0.97589600 |
| H  | -4.79782100 | -0.79777800 | -2.55797200 | C    | 4.28010800  | -1.71743500 | -0.78706900 |
| C  | 1.99272500  | 1.99009400  | -0.63677900 | C    | 4.49093000  | -3.05268500 | -0.45240800 |
| C  | 0.99382400  | 2.63453400  | 0.17696800  | H    | 3.55188500  | -4.95763700 | -0.06899500 |
| C  | 2.76957000  | 2.80572100  | -1.45776400 | H    | 1.26234500  | -4.11450300 | -0.48468400 |
| C  | 0.80004600  | 4.04538400  | 0.13316400  | H    | 5.11383200  | -1.03171200 | -0.89446500 |
| C  | 2.57347400  | 4.20431900  | -1.48976000 | H    | 5.50022100  | -3.42136000 | -0.29699200 |
| H  | 3.52892800  | 2.34395100  | -2.07095100 | C    | 2.84724900  | 0.25595400  | -1.26904600 |
| C  | -0.72256700 | 2.37866200  | 1.74757300  | O    | 3.63046300  | 0.80762400  | -2.05183000 |
| C  | -0.21865300 | 4.58623900  | 0.95517300  | N    | 1.82949400  | 0.84451600  | -0.58373600 |
| C  | 1.61641400  | 4.82880000  | -0.72082100 | C    | -0.49832100 | -1.96067300 | -0.23683500 |
| H  | 3.20445400  | 4.79615100  | -2.14677800 | C    | -1.94932900 | -1.73549300 | -0.28517400 |
| C  | -0.97858300 | 3.76223500  | 1.75778100  | C    | -2.62851000 | -1.53045700 | 0.93418600  |
| H  | -1.28036300 | 1.68329300  | 2.36550900  | C    | -2.71023600 | -1.73210300 | -1.46388800 |
| H  | -0.39121200 | 5.65887100  | 0.94135100  | C    | -3.99149200 | -1.28343300 | 0.96806600  |
| H  | 1.47361900  | 5.90422200  | -0.75566700 | H    | -2.05760100 | -1.54478800 | 1.85712400  |
| H  | -1.76336400 | 4.15733600  | 2.39285300  | C    | -4.08559200 | -1.49898900 | -1.44280600 |
| N  | 0.22298000  | 1.84505100  | 0.98657400  | H    | -2.23793000 | -1.94417000 | -2.41456800 |
| C  | 0.16519600  | -1.57280100 | -1.11083400 | C    | -4.73186700 | -1.25700900 | -0.22445900 |
| C  | -0.71058500 | 0.51218100  | -2.31907600 | H    | -4.51004700 | -1.11219100 | 1.90587500  |
| C  | 0.04957700  | -0.76551700 | -2.39781100 | H    | -4.63895200 | -1.51203900 | -2.37371900 |
| H  | -1.03967200 | 1.00016500  | -3.22980700 | C    | 1.43680000  | 2.16431700  | -0.76418200 |
| H  | -0.84102800 | 1.03505800  | -1.38101500 | C    | 0.30887700  | 2.54391900  | 0.03255200  |
| H  | -0.38928600 | -1.42478000 | -3.16434800 | C    | 1.97416200  | 3.12180000  | -1.62130900 |
| H  | 1.06191200  | -0.56994800 | -2.77694100 | C    | -0.26820900 | 3.84045000  | -0.05083600 |
| H  | -0.64011800 | -2.38370100 | 0.64367800  | C    | 1.40443700  | 4.41296400  | -1.69270100 |
| C  | 0.59726900  | -1.10372900 | 3.12004800  | H    | 2.82886100  | 2.85937400  | -2.22683700 |
| O  | 1.66031200  | -1.06340900 | 2.40672100  | C    | -1.25927200 | 1.84966200  | 1.61713900  |
| O  | -0.48027500 | -0.63952900 | 2.65072100  | C    | -1.40020700 | 4.09421000  | 0.76397000  |
| C  | 0.64707400  | -1.68538500 | 4.50882800  | C    | 0.31071000  | 4.78293000  | -0.93760800 |
| H  | 0.49298800  | -0.88308900 | 5.23828000  | H    | 1.85143400  | 5.13290900  | -2.37242300 |
| H  | -0.16721000 | -2.40416600 | 4.63674900  | C    | -1.89499100 | 3.10690200  | 1.58860900  |
| H  | 1.60629800  | -2.16722000 | 4.70127600  | H    | -1.60376100 | 1.04550100  | 2.25716200  |
| Co | 0.79222800  | -0.12421600 | 0.84362200  | H    | -1.87008900 | 5.07295200  | 0.72724500  |
| O  | -6.28979800 | -0.19912700 | -0.34348300 | H    | -0.11447800 | 5.77891200  | -1.01058000 |
| C  | -7.00618400 | -0.05182100 | -1.56328900 | H    | -2.76158800 | 3.27852500  | 2.21715000  |
| H  | -7.07313100 | -1.00074300 | -2.10987300 | N    | -0.20144900 | 1.58526400  | 0.86432200  |
| H  | -8.01059600 | 0.27219700  | -1.28559700 | C    | 0.47476800  | -1.62785600 | -1.13451100 |

|         |             |             |             |       |             |             |             |
|---------|-------------|-------------|-------------|-------|-------------|-------------|-------------|
| C       | -0.73539400 | 0.19896300  | -2.47145600 | H     | -4.17745500 | -1.56544100 | 1.94831700  |
| C       | 0.22966500  | -0.93464600 | -2.46767300 | H     | -4.16057600 | -2.03873400 | -2.32550200 |
| H       | -1.12447600 | 0.56945700  | -3.41347700 | C     | 0.85023500  | 2.29306900  | -0.80904700 |
| H       | -0.97946000 | 0.73595500  | -1.56643800 | C     | -0.28074400 | 2.42245200  | 0.06009100  |
| H       | -0.08833800 | -1.70800600 | -3.18662000 | C     | 1.07364000  | 3.31167900  | -1.73350300 |
| H       | 1.19581900  | -0.59524500 | -2.86718400 | C     | -1.16698600 | 3.53129700  | -0.01841600 |
| H       | -0.16620600 | -2.47217800 | 0.66310200  | C     | 0.19557600  | 4.41668300  | -1.80169700 |
| C       | 1.15745100  | -0.41211200 | 3.20092300  | H     | 1.92646900  | 3.24120900  | -2.39201700 |
| O       | 2.08675100  | 0.21936100  | 2.63239100  | C     | -1.51178600 | 1.44604900  | 1.78647900  |
| O       | 0.17712100  | -0.84911300 | 2.48433300  | C     | -2.26881600 | 3.53864300  | 0.87380800  |
| C       | 1.14179600  | -0.65819300 | 4.68404500  | C     | -0.90319400 | 4.54195500  | -0.97688300 |
| H       | 0.29509300  | -0.12528200 | 5.12947600  | H     | 0.40249800  | 5.19038500  | -2.53566000 |
| H       | 0.99770200  | -1.72470100 | 4.88089500  | C     | -2.44192700 | 2.50437800  | 1.76781100  |
| H       | 2.06990700  | -0.31590200 | 5.14290700  | H     | -1.59761500 | 0.61742700  | 2.47914900  |
| Co      | 0.89401900  | -0.05952000 | 0.82567700  | H     | -2.97058200 | 4.36731500  | 0.84138900  |
| O       | -6.06122300 | -1.00382400 | -0.09239700 | H     | -1.56817500 | 5.39692000  | -1.04777300 |
| C       | -6.85342600 | -0.95738800 | -1.27257800 | H     | -3.27823500 | 2.48862400  | 2.45761700  |
| H       | -6.85034300 | -1.91933000 | -1.80015100 | N     | -0.47802800 | 1.41010100  | 0.95853800  |
| H       | -7.86978100 | -0.73308100 | -0.94441900 | C     | 0.75510600  | -1.60296400 | -1.06742500 |
| H       | -6.51329400 | -0.16914100 | -1.95574200 | C     | -1.14391500 | -0.36121400 | -2.23506100 |
| TS5_OSS |             |             |             | C     | 0.21215700  | -0.98580200 | -2.35036400 |
| C       | 4.16253100  | -3.18016400 | -0.53333800 | H     | -1.69866900 | -0.19081600 | -3.15316100 |
| C       | 2.78557200  | -3.00089500 | -0.64072500 | H     | -1.31362700 | 0.36237900  | -1.44602900 |
| C       | 2.23595700  | -1.74106100 | -0.93589400 | H     | 0.19637400  | -1.77536600 | -3.11649500 |
| C       | 3.11766000  | -0.64746700 | -1.12277400 | H     | 0.92980500  | -0.24863700 | -2.72904300 |
| C       | 4.49928600  | -0.84914000 | -1.04731500 | H     | 0.40075000  | -2.54611400 | 0.78682100  |
| C       | 5.02500700  | -2.10244600 | -0.74482900 | C     | 1.47597100  | -0.21079600 | 3.19273800  |
| H       | 4.56154700  | -4.16360000 | -0.30331500 | O     | 2.22911800  | 0.55930800  | 2.53809200  |
| H       | 2.11612200  | -3.84704700 | -0.52160200 | O     | 0.52868700  | -0.82448200 | 2.56913800  |
| H       | 5.15053200  | 0.00217100  | -1.21472100 | C     | 1.62836800  | -0.41386200 | 4.67439100  |
| H       | 6.09980500  | -2.23897900 | -0.67492600 | H     | 0.78580600  | 0.06096000  | 5.18897600  |
| C       | 2.63488100  | 0.75767000  | -1.38836000 | H     | 1.59893200  | -1.48124600 | 4.91029000  |
| O       | 3.21177400  | 1.45945600  | -2.22824700 | H     | 2.56072300  | 0.02528400  | 5.03097900  |
| N       | 1.56576100  | 1.11711600  | -0.62470700 | Co    | 0.95578500  | 0.05691000  | 0.85407800  |
| C       | -0.06131100 | -2.12679100 | -0.10281100 | O     | -5.65554800 | -1.51594700 | -0.10050400 |
| C       | -1.51868800 | -2.11699600 | -0.13548700 | C     | -6.41219300 | -1.50623700 | -1.30392300 |
| C       | -2.24397000 | -1.92994900 | 1.05122000  | H     | -6.37328700 | -2.47708400 | -1.81376400 |
| C       | -2.22522500 | -2.12290000 | -1.37369700 | H     | -7.44278300 | -1.29780100 | -1.01140900 |
| C       | -3.61708800 | -1.72525000 | 1.03331900  | H     | -6.06635900 | -0.72394900 | -1.99120200 |
| H       | -1.70433800 | -1.90730100 | 1.99299400  | TS5_Q |             |             |             |
| C       | -3.63245100 | -1.96659200 | -1.38296000 | C     | 4.26685900  | -3.03235500 | -0.68924500 |
| H       | -1.77016500 | -2.60153400 | -2.23361500 | C     | 2.88443200  | -2.89862300 | -0.79336500 |
| C       | -4.31366100 | -1.72381100 | -0.19385700 | C     | 2.28855000  | -1.65072100 | -1.04641900 |

|   |             |             |             |       |             |             |             |
|---|-------------|-------------|-------------|-------|-------------|-------------|-------------|
| C | 3.13075900  | -0.51851800 | -1.18764200 | H     | 0.50256000  | -2.55130600 | 0.67124400  |
| C | 4.51903100  | -0.67426200 | -1.11872000 | C     | 1.50087200  | -0.31303500 | 3.30821200  |
| C | 5.09002600  | -1.91767800 | -0.86033700 | O     | 2.09332500  | 0.61738000  | 2.67841000  |
| H | 4.70049600  | -4.00837100 | -0.49282600 | O     | 0.69840500  | -1.07989400 | 2.67471000  |
| H | 2.24587100  | -3.77183600 | -0.70425400 | C     | 1.69888200  | -0.48955700 | 4.78917900  |
| H | 5.14057500  | 0.20477500  | -1.25335600 | H     | 0.85148800  | -0.03291100 | 5.31329900  |
| H | 6.16902300  | -2.01711100 | -0.79255500 | H     | 1.71665800  | -1.55124000 | 5.04583600  |
| C | 2.60184600  | 0.88101200  | -1.39991200 | H     | 2.61706500  | -0.00163900 | 5.11918700  |
| O | 3.13520700  | 1.61541300  | -2.23791300 | Co    | 1.03917100  | 0.07076000  | 0.93968000  |
| N | 1.54028200  | 1.18567800  | -0.59277200 | O     | -5.58663800 | -1.62686400 | -0.09434700 |
| C | 0.01605400  | -2.13067400 | -0.20595800 | C     | -6.36395800 | -1.60744100 | -1.28420800 |
| C | -1.44101400 | -2.15033000 | -0.21245100 | H     | -6.31313900 | -2.56575200 | -1.81627900 |
| C | -2.14819900 | -2.00085800 | 0.99047100  | H     | -7.39361000 | -1.42800000 | -0.96996200 |
| C | -2.16823700 | -2.14187000 | -1.43818900 | H     | -6.04708200 | -0.80294500 | -1.95979200 |
| C | -3.52510800 | -1.82122800 | 0.99981700  |       |             |             |             |
| H | -1.59322000 | -1.99023400 | 1.92401900  | TS5_T |             |             |             |
| C | -3.57804300 | -2.01140700 | -1.42065600 | C     | 4.23145600  | -3.04419600 | -0.69622700 |
| H | -1.71771900 | -2.59098900 | -2.31640500 | C     | 2.84987700  | -2.89590500 | -0.79002400 |
| C | -4.24266900 | -1.80708700 | -0.21505200 | C     | 2.26575800  | -1.64305300 | -1.04734000 |
| H | -4.07264300 | -1.69147500 | 1.92725500  | C     | 3.11940400  | -0.52149300 | -1.20561800 |
| H | -4.12080700 | -2.07223600 | -2.35568000 | C     | 4.50610200  | -0.69263300 | -1.14806000 |
| C | 0.74891500  | 2.31927300  | -0.76387800 | C     | 5.06535700  | -1.94042000 | -0.88504400 |
| C | -0.39329000 | 2.39674900  | 0.10885700  | H     | 4.65594200  | -4.02333700 | -0.49549000 |
| C | 0.91689500  | 3.34032800  | -1.69567400 | H     | 2.20279600  | -3.76176200 | -0.69111900 |
| C | -1.32987100 | 3.46478900  | 0.00721100  | H     | 5.13600100  | 0.17861500  | -1.29380300 |
| C | -0.01279400 | 4.40109400  | -1.78219100 | H     | 6.14375200  | -2.05151900 | -0.82637400 |
| H | 1.77337400  | 3.30614300  | -2.35236800 | C     | 2.60551000  | 0.88618400  | -1.40524800 |
| C | -1.60321000 | 1.39968600  | 1.83500600  | O     | 3.14250400  | 1.62098400  | -2.24121300 |
| C | -2.43924900 | 3.43989700  | 0.88902600  | N     | 1.55843900  | 1.19686900  | -0.58354000 |
| C | -1.11633600 | 4.47798500  | -0.96142500 | C     | -0.01712900 | -2.11621900 | -0.22070500 |
| H | 0.15849300  | 5.17506800  | -2.52492000 | C     | -1.47497700 | -2.12546300 | -0.24207500 |
| C | -2.58006300 | 2.41420500  | 1.79753700  | C     | -2.19585900 | -1.98692900 | 0.95410700  |
| H | -1.66971000 | 0.57429900  | 2.53578200  | C     | -2.18760000 | -2.09765600 | -1.47625400 |
| H | -3.17365800 | 4.23874700  | 0.83474200  | C     | -3.57231800 | -1.80303000 | 0.94842000  |
| H | -1.82458900 | 5.29685900  | -1.04076700 | H     | -1.65173800 | -1.98734300 | 1.89355900  |
| H | -3.42249900 | 2.37271000  | 2.47876700  | C     | -3.59729500 | -1.96497000 | -1.47423900 |
| N | -0.55889200 | 1.39404700  | 1.02211900  | H     | -1.72813500 | -2.53612700 | -2.35524200 |
| C | 0.80445100  | -1.56957700 | -1.17045600 | C     | -4.27586600 | -1.77394900 | -0.27439300 |
| C | -1.13961900 | -0.33144500 | -2.26250200 | H     | -4.13037700 | -1.68219400 | 1.87080000  |
| C | 0.23063300  | -0.91418500 | -2.41895500 | H     | -4.12848800 | -2.01331700 | -2.41657600 |
| H | -1.71288200 | -0.14340000 | -3.16561800 | C     | 0.79391200  | 2.35246700  | -0.71639600 |
| H | -1.31583200 | 0.35868400  | -1.44565500 | C     | -0.33750500 | 2.43801400  | 0.17071400  |
| H | 0.22764700  | -1.66786700 | -3.22045300 | C     | 0.97924400  | 3.39386100  | -1.62257300 |
| H | 0.92510000  | -0.14183300 | -2.77138900 | C     | -1.24507800 | 3.53397700  | 0.10733000  |

|        |             |             |             |   |             |             |             |
|--------|-------------|-------------|-------------|---|-------------|-------------|-------------|
| C      | 0.07846400  | 4.48149900  | -1.67093700 | H | 6.10028100  | -2.25197700 | -0.70886500 |
| H      | 1.82743600  | 3.35319300  | -2.28969400 | C | 2.65110900  | 0.78019900  | -1.34178600 |
| C      | -1.55928200 | 1.43019500  | 1.88556700  | O | 3.24196900  | 1.49855600  | -2.15852600 |
| C      | -2.34554200 | 3.51662900  | 1.00009500  | N | 1.57172000  | 1.12832000  | -0.58825600 |
| C      | -1.01410300 | 4.56665400  | -0.83639400 | C | -0.05553600 | -2.11704300 | -0.12022900 |
| H      | 0.26329800  | 5.26984700  | -2.39507200 | C | -1.51390600 | -2.10989300 | -0.15178800 |
| C      | -2.50677100 | 2.47221400  | 1.88406300  | C | -2.24034800 | -1.94619700 | 1.03704400  |
| H      | -1.63904000 | 0.58854000  | 2.56533100  | C | -2.21987500 | -2.09928600 | -1.39035100 |
| H      | -3.05780200 | 4.33669100  | 0.97395100  | C | -3.61454600 | -1.74648800 | 1.02224200  |
| H      | -1.70082900 | 5.40588500  | -0.88649200 | H | -1.70146800 | -1.93754200 | 1.97940700  |
| H      | -3.34343900 | 2.43728200  | 2.57270600  | C | -3.62767900 | -1.94642700 | -1.39761800 |
| N      | -0.52348800 | 1.41753400  | 1.06105300  | H | -1.76369900 | -2.56564400 | -2.25650900 |
| C      | 0.78288100  | -1.54664700 | -1.17150300 | C | -4.31025400 | -1.72546400 | -0.20493900 |
| C      | -1.14565500 | -0.27859800 | -2.25852500 | H | -4.17578100 | -1.60486700 | 1.93970900  |
| C      | 0.21962600  | -0.87251300 | -2.41568500 | H | -4.15530300 | -2.00471300 | -2.34143000 |
| H      | -1.71073800 | -0.07077900 | -3.16247200 | C | 0.86297000  | 2.30856900  | -0.76669900 |
| H      | -1.31982000 | 0.40205300  | -1.43275900 | C | -0.28896100 | 2.42036600  | 0.07582000  |
| H      | 0.21114600  | -1.62012200 | -3.22279700 | C | 1.10739100  | 3.34567800  | -1.66578900 |
| H      | 0.92229800  | -0.10472500 | -2.76030100 | C | -1.17659300 | 3.52794400  | -0.00340800 |
| H      | 0.45788400  | -2.55670300 | 0.65258400  | C | 0.22821000  | 4.44941500  | -1.73465500 |
| C      | 1.45956500  | -0.49914300 | 3.26945100  | H | 1.97612500  | 3.28920300  | -2.30437600 |
| O      | 2.16726600  | 0.34331400  | 2.62820400  | C | -1.55759700 | 1.40783000  | 1.75419800  |
| O      | 0.53188500  | -1.12132700 | 2.65766300  | C | -2.29978200 | 3.51499500  | 0.86186600  |
| C      | 1.68486400  | -0.71963100 | 4.74101800  | C | -0.89161400 | 4.55697500  | -0.93557400 |
| H      | 1.01717900  | -0.05383600 | 5.30026000  | H | 0.45156000  | 5.23754900  | -2.44820500 |
| H      | 1.44404500  | -1.74853200 | 5.01593600  | C | -2.49060500 | 2.46352400  | 1.73186700  |
| H      | 2.71388100  | -0.48079100 | 5.01480900  | H | -1.65752000 | 0.56702700  | 2.42957400  |
| Co     | 1.01898900  | 0.04284200  | 0.91804900  | H | -3.00345300 | 4.34199200  | 0.82825700  |
| O      | -5.62090200 | -1.59312600 | -0.16774500 | H | -1.55635800 | 5.41208100  | -1.00671700 |
| C      | -6.38437500 | -1.56293400 | -1.36636700 | H | -3.34296700 | 2.43238500  | 2.40117000  |
| H      | -6.32728100 | -2.51651300 | -1.90623700 | N | -0.50415000 | 1.39040700  | 0.95029400  |
| H      | -7.41762600 | -1.38620100 | -1.06254500 | C | 0.75866400  | -1.57936500 | -1.07861400 |
| H      | -6.05974100 | -0.75250700 | -2.03108900 | C | -1.14454700 | -0.32596100 | -2.22881200 |
|        |             |             |             | C | 0.21553300  | -0.94023600 | -2.35062100 |
|        |             |             |             | H | -1.69883400 | -0.14662300 | -3.14551700 |
| TS5_T' |             |             |             | H | -1.31910600 | 0.38666800  | -1.43122700 |
| C      | 4.15863600  | -3.18836400 | -0.59917300 | H | 0.20822100  | -1.71430800 | -3.13246000 |
| C      | 2.78251500  | -2.99892100 | -0.70083900 | H | 0.93036900  | -0.19089100 | -2.71049400 |
| C      | 2.23933100  | -1.72786900 | -0.95600200 | H | 0.40856000  | -2.55634700 | 0.75872900  |
| C      | 3.12565600  | -0.63296900 | -1.10784800 | C | 1.47812400  | -0.24948100 | 3.17815000  |
| C      | 4.50630700  | -0.84367900 | -1.03772500 | O | 2.23773400  | 0.50470800  | 2.50917500  |
| C      | 5.02615400  | -2.10833600 | -0.77495000 | O | 0.50002700  | -0.82702200 | 2.56871800  |
| H      | 4.55282300  | -4.18062800 | -0.40078600 | C | 1.67281300  | -0.48633300 | 4.64871100  |
| H      | 2.10865600  | -3.84487500 | -0.60751800 | H | 0.77300000  | -0.17728800 | 5.19004800  |
| H      | 5.16139200  | 0.00941500  | -1.17882800 |   |             |             |             |

|       |             |             |             |     |             |             |             |
|-------|-------------|-------------|-------------|-----|-------------|-------------|-------------|
| H     | 1.81374500  | -1.55629500 | 4.83127100  | C   | -3.08858300 | 1.05670300  | 1.77402200  |
| H     | 2.53571500  | 0.06812400  | 5.01879800  | H   | -1.83138700 | -0.70406300 | 2.09105500  |
| Co    | 0.93697200  | 0.05491400  | 0.86728200  | H   | -4.01195700 | 2.93857400  | 1.31183200  |
| O     | -5.65281600 | -1.52260800 | -0.10872000 | H   | -2.75950200 | 4.80140500  | 0.05692500  |
| C     | -6.40850000 | -1.49016400 | -1.31225500 | H   | -3.95686400 | 0.62845200  | 2.26194500  |
| H     | -6.36811400 | -2.45060300 | -1.84134500 | N   | -0.82391200 | 0.76195700  | 1.07513700  |
| H     | -7.43958700 | -1.28887100 | -1.01645300 | C   | 1.15862600  | -1.16274500 | -1.39432100 |
| H     | -6.06320300 | -0.69392200 | -1.98363500 | C   | -0.97335500 | -0.17246700 | -2.34787700 |
|       |             |             |             | C   | 0.52548400  | -0.40403800 | -2.54330800 |
| 9_OSS |             |             |             | H   | -1.41088900 | 0.23875700  | -3.26345000 |
| C     | 4.80536300  | -2.11753600 | -0.99655400 | H   | -1.12706700 | 0.56632400  | -1.55931900 |
| C     | 3.42409800  | -2.20143600 | -1.15329800 | H   | 0.69276000  | -1.00618100 | -3.44999500 |
| C     | 2.62455500  | -1.04494200 | -1.17745500 | H   | 1.03431600  | 0.54523500  | -2.71830800 |
| C     | 3.25455700  | 0.21699600  | -1.02266400 | H   | 0.87369200  | -2.68331900 | 0.07476500  |
| C     | 4.64483000  | 0.28719300  | -0.89992500 | C   | 1.39673800  | -0.84841700 | 3.11678600  |
| C     | 5.42089000  | -0.86925400 | -0.87913300 | O   | 1.95433000  | 0.22308400  | 2.75268600  |
| H     | 5.40214200  | -3.02472000 | -0.98540300 | O   | 0.66514500  | -1.48275900 | 2.26772400  |
| H     | 2.95010900  | -3.16842200 | -1.29089100 | C   | 1.53763700  | -1.38848300 | 4.51271300  |
| H     | 5.10150600  | 1.26659800  | -0.80417500 | H   | 0.59008100  | -1.25251100 | 5.04548000  |
| H     | 6.49872000  | -0.79865100 | -0.76980400 | H   | 1.74653700  | -2.46126500 | 4.47972200  |
| C     | 2.47890700  | 1.51137300  | -0.95656400 | H   | 2.32939800  | -0.86634100 | 5.05118400  |
| O     | 2.90431300  | 2.51908400  | -1.53408500 | Co  | 0.93777800  | -0.11238200 | 0.86799500  |
| N     | 1.33727700  | 1.41755500  | -0.21934000 | O   | -5.16117300 | -1.75261400 | -0.41375800 |
| C     | 0.39782700  | -2.07493600 | -0.68956400 | C   | -5.89704900 | -0.79235600 | -1.15671000 |
| C     | -1.01408000 | -2.19794300 | -0.83539200 | H   | -5.93030700 | -1.04526700 | -2.22421600 |
| C     | -1.77013100 | -2.91510400 | 0.10062400  | H   | -6.91140100 | -0.80531500 | -0.75371700 |
| C     | -1.71298500 | -1.47127800 | -1.96385000 | H   | -5.47041800 | 0.21239700  | -1.03975500 |
| C     | -3.14888000 | -2.80713300 | 0.15575200  |     |             |             |             |
| H     | -1.24891800 | -3.50567000 | 0.84940600  | 9_Q |             |             |             |
| C     | -3.17667700 | -1.23372600 | -1.70618100 | C   | 4.77436300  | -2.12468100 | -1.00315100 |
| H     | -1.63422800 | -2.13642900 | -2.84858600 | C   | 3.39500200  | -2.18898100 | -1.17781400 |
| C     | -3.83687400 | -1.89032400 | -0.71588700 | C   | 2.60748600  | -1.02432400 | -1.19518700 |
| H     | -3.73007900 | -3.33382000 | 0.90461500  | C   | 3.24432700  | 0.22934900  | -1.01397500 |
| H     | -3.68586200 | -0.54800700 | -2.37316500 | C   | 4.63501900  | 0.27893400  | -0.87510300 |
| C     | 0.36493600  | 2.40818600  | -0.16953000 | C   | 5.39985400  | -0.88452800 | -0.86020700 |
| C     | -0.82593200 | 2.01365000  | 0.52405400  | H   | 5.36089300  | -3.03858000 | -0.99685000 |
| C     | 0.38740600  | 3.67894100  | -0.74091900 | H   | 2.91087800  | -3.14834100 | -1.33317900 |
| C     | -1.96873800 | 2.85559700  | 0.59648800  | H   | 5.10235700  | 1.25117300  | -0.76059800 |
| C     | -0.74029900 | 4.52462200  | -0.63993200 | H   | 6.47675300  | -0.82512500 | -0.73545100 |
| H     | 1.27564100  | 4.00017800  | -1.26448800 | C   | 2.50572000  | 1.54765200  | -0.92498900 |
| C     | -1.90586000 | 0.29525900  | 1.67932400  | O   | 2.97547000  | 2.53893300  | -1.49665300 |
| C     | -3.11534500 | 2.32869300  | 1.24478700  | N   | 1.36959100  | 1.49698700  | -0.16929100 |
| C     | -1.89981900 | 4.14091300  | 0.00226900  | C   | 0.38339500  | -2.02255700 | -0.67331600 |
| H     | -0.68400100 | 5.50936500  | -1.09517100 | C   | -1.03839600 | -2.14952200 | -0.81324800 |

|    |             |             |             |     |             |             |             |
|----|-------------|-------------|-------------|-----|-------------|-------------|-------------|
| C  | -1.80113600 | -2.84143600 | 0.12916100  | H   | -7.02572400 | -1.18171600 | -1.17612500 |
| C  | -1.71422500 | -1.45245200 | -1.97152800 | H   | -5.67459900 | -0.04433400 | -1.44005300 |
| C  | -3.18752500 | -2.78636400 | 0.12447900  |     |             |             |             |
| H  | -1.28913800 | -3.36827700 | 0.92815800  | 9_T |             |             |             |
| C  | -3.19983400 | -1.29849700 | -1.80593800 | C   | 4.60852400  | -2.43248300 | -0.92880100 |
| H  | -1.54596400 | -2.09456700 | -2.86086700 | C   | 3.22347800  | -2.40811600 | -1.06274100 |
| C  | -3.87756100 | -1.96060400 | -0.82908400 | C   | 2.51667400  | -1.19348600 | -1.12103300 |
| H  | -3.77699200 | -3.30347600 | 0.87342200  | C   | 3.24555300  | 0.01965300  | -1.02847900 |
| H  | -3.71055200 | -0.68048800 | -2.53513400 | C   | 4.63991600  | -0.02220400 | -0.93044800 |
| C  | 0.47234700  | 2.55538400  | -0.06752800 | C   | 5.32262600  | -1.23413800 | -0.87064200 |
| C  | -0.73863300 | 2.26618800  | 0.65950900  | H   | 5.13010600  | -3.38408500 | -0.88905100 |
| C  | 0.59497200  | 3.83191000  | -0.61492500 | H   | 2.67141400  | -3.33820500 | -1.15572100 |
| C  | -1.77850400 | 3.23190200  | 0.78399000  | H   | 5.17613000  | 0.91959600  | -0.88426000 |
| C  | -0.43381600 | 4.78920500  | -0.46903600 | H   | 6.40434100  | -1.24453800 | -0.77829400 |
| H  | 1.49543500  | 4.07351500  | -1.15946900 | C   | 2.60614800  | 1.39112400  | -0.99428000 |
| C  | -1.98214300 | 0.67350000  | 1.84193100  | O   | 3.13383400  | 2.31901500  | -1.61909500 |
| C  | -2.95093500 | 2.83703400  | 1.47474800  | N   | 1.48446000  | 1.45654100  | -0.21926300 |
| C  | -1.60198200 | 4.51482000  | 0.20745400  | C   | 0.24358600  | -2.08575400 | -0.58067000 |
| H  | -0.28892400 | 5.76965400  | -0.91384400 | C   | -1.17363400 | -2.17536700 | -0.74611600 |
| C  | -3.05993200 | 1.56542600  | 1.99541000  | C   | -1.96863100 | -2.84157200 | 0.19059700  |
| H  | -2.00643500 | -0.33620800 | 2.23679700  | C   | -1.81684000 | -1.46522400 | -1.91601400 |
| H  | -3.76280200 | 3.55122200  | 1.58199400  | C   | -3.35106900 | -2.74775100 | 0.16865200  |
| H  | -2.38887700 | 5.25617000  | 0.30485000  | H   | -1.48133800 | -3.37838000 | 0.99854600  |
| H  | -3.95207500 | 1.24209400  | 2.51963600  | C   | -3.29956400 | -1.26892100 | -1.76875500 |
| N  | -0.87309300 | 1.01832300  | 1.20375200  | H   | -1.65836500 | -2.11474000 | -2.80161100 |
| C  | 1.14493500  | -1.14028400 | -1.41292200 | C   | -4.00683700 | -1.90814000 | -0.79830400 |
| C  | -1.00492900 | -0.11876800 | -2.29091400 | H   | -3.96432600 | -3.24385800 | 0.91268400  |
| C  | 0.49318300  | -0.33292800 | -2.51692600 | H   | -3.78433900 | -0.64080900 | -2.50702100 |
| H  | -1.45552800 | 0.33482900  | -3.17969800 | C   | 0.66363400  | 2.57727500  | -0.14875600 |
| H  | -1.16007100 | 0.57462300  | -1.45983400 | C   | -0.55805800 | 2.39601600  | 0.59419100  |
| H  | 0.64788700  | -0.88999300 | -3.45395000 | C   | 0.87426600  | 3.82425100  | -0.73485200 |
| H  | 0.99918800  | 0.62392600  | -2.65335900 | C   | -1.52079100 | 3.44010400  | 0.70382900  |
| H  | 0.86736600  | -2.64103100 | 0.07892300  | C   | -0.07999000 | 4.85844500  | -0.60732100 |
| C  | 1.26147500  | -1.51770600 | 2.88341300  | H   | 1.78464700  | 3.98305300  | -1.29338600 |
| O  | 2.08325100  | -0.69416800 | 2.33827500  | C   | -1.89858000 | 0.93352900  | 1.83603200  |
| O  | 0.11516900  | -1.67064900 | 2.38094200  | C   | -2.70856700 | 3.15376900  | 1.42138300  |
| C  | 1.69649700  | -2.26837300 | 4.11459900  | C   | -1.25654200 | 4.68995500  | 0.08899900  |
| H  | 1.86890800  | -1.55708300 | 4.92899100  | H   | 0.13102900  | 5.81272400  | -1.08156800 |
| H  | 0.94029700  | -2.99327100 | 4.41813000  | C   | -2.90300200 | 1.90895800  | 1.98051800  |
| H  | 2.64617800  | -2.77585000 | 3.92109500  | H   | -1.99105800 | -0.05987900 | 2.26152400  |
| Co | 0.81715300  | -0.10153300 | 0.89679600  | H   | -3.46311500 | 3.92940200  | 1.51970900  |
| O  | -5.22660200 | -1.91408900 | -0.62650500 | H   | -1.98485400 | 5.49039400  | 0.17332100  |
| C  | -5.98739000 | -1.09480000 | -1.50125800 | H   | -3.80737500 | 1.66885100  | 2.52808900  |
| H  | -5.90519600 | -1.43184600 | -2.54263200 | N   | -0.77782400 | 1.17512000  | 1.17134600  |



C 1.04318900 -1.22314800 -1.30676100  
 C -1.06438000 -0.15502100 -2.23120200  
 C 0.42747400 -0.42269900 -2.43905400  
 H -1.48886000 0.30945300 -3.12721400  
 H -1.20481500 0.54621500 -1.40327700  
 H 0.56857700 -1.01387400 -3.35716100  
 H 0.96534500 0.51186800 -2.59997400  
 H 0.69452500 -2.70293900 0.19156900  
 C 1.11055400 -1.48368600 2.91860500  
 O 2.00041500 -0.73137700 2.37358800  
 O -0.03325300 -1.56887300 2.40068000  
 C 1.47708600 -2.24008400 4.16946100  
 H 1.74290300 -1.53019300 4.95922900  
 H 0.64988900 -2.86756100 4.50336700  
 H 2.36024100 -2.85777700 3.97942100  
 Co 0.83921500 -0.06466800 0.88569300  
 O -5.35657900 -1.82597000 -0.61329500  
 C -6.08550000 -0.99564500 -1.50464500  
 H -5.99746800 -1.34323600 -2.54208700  
 H -7.12985800 -1.05472600 -1.19289600  
 H -5.74831700 0.04745600 -1.44760800

9\_T'

C 4.85769400 -2.08719400 -0.87473700  
 C 3.48198100 -2.19957200 -1.06343700  
 C 2.66507200 -1.05786800 -1.13183100  
 C 3.26854500 0.21890800 -0.99384500  
 C 4.65361700 0.31639800 -0.84096300  
 C 5.44862600 -0.82601000 -0.77296800  
 H 5.46923500 -2.98322100 -0.82509500  
 H 3.02756900 -3.17797300 -1.18606800  
 H 5.09059700 1.30570800 -0.75585300  
 H 6.52184800 -0.73389800 -0.63738400  
 C 2.46823700 1.50030800 -0.96496700  
 O 2.89981900 2.51202800 -1.53172100  
 N 1.30172300 1.39396400 -0.26940400  
 C 0.43729400 -2.09816400 -0.64901900  
 C -0.97485800 -2.21831500 -0.79609800  
 C -1.73628000 -2.91463000 0.15302500  
 C -1.66821700 -1.51472700 -1.94161900  
 C -3.11389500 -2.80232800 0.19898300  
 H -1.21924000 -3.48846400 0.91729200  
 C -3.13415100 -1.27721400 -1.70236000  
 H -1.58093800 -2.19766500 -2.81190900

C -3.79969800 -1.91138000 -0.70156400  
 H -3.69929600 -3.31101100 0.95704200  
 H -3.64033400 -0.61201500 -2.39195500  
 C 0.33060500 2.38457000 -0.22426200  
 C -0.85362900 2.00739100 0.49224500  
 C 0.34918700 3.64359700 -0.82247300  
 C -1.99304600 2.85547300 0.55741400  
 C -0.77590700 4.49291900 -0.73079800  
 H 1.23367300 3.95193000 -1.35989000  
 C -1.92553100 0.32430200 1.70404000  
 C -3.13339400 2.34982600 1.23315100  
 C -1.92946800 4.12577000 -0.06851100  
 H -0.72296100 5.46623200 -1.21047100  
 C -3.10409600 1.09277200 1.79633300  
 H -1.85167600 -0.66613700 2.13789400  
 H -4.02707700 2.96468200 1.29432500  
 H -2.78807600 4.78825100 -0.02106200  
 H -3.96759700 0.68144400 2.30690800  
 N -0.85001500 0.76907300 1.07332400  
 C 1.20320300 -1.19610400 -1.36688000  
 C -0.92707400 -0.22351100 -2.34570900  
 C 0.57160100 -0.46544200 -2.53552500  
 H -1.36127500 0.17172100 -3.26979900  
 H -1.08006100 0.52886400 -1.57070400  
 H 0.73493900 -1.09524500 -3.42402700  
 H 1.08422500 0.47586600 -2.73782400  
 H 0.91020200 -2.69928100 0.12245600  
 C 1.34696100 -0.75572500 3.09679000  
 O 1.84915400 0.33200900 2.70035700  
 O 0.68989700 -1.47623300 2.25489800  
 C 1.45984300 -1.21134900 4.52502500  
 H 0.49996100 -1.04521600 5.02701200  
 H 1.67369300 -2.28259200 4.56424200  
 H 2.23503200 -0.65048100 5.04881300  
 Co 0.90239600 -0.13599700 0.81934800  
 O -5.12721200 -1.77552100 -0.41588400  
 C -5.86445500 -0.84761100 -1.19814000  
 H -5.88154200 -1.13558300 -2.25711000  
 H -6.88338200 -0.85902400 -0.80706700  
 H -5.45005000 0.16496700 -1.10860200

10s\_OSS

C -0.19098500 -4.42880500 -0.09201000  
 C -1.20542400 -3.47607400 -0.07576200

|   |             |             |             |       |             |             |             |
|---|-------------|-------------|-------------|-------|-------------|-------------|-------------|
| C | -1.02453500 | -2.17531700 | -0.58755300 | H     | -1.03502000 | 0.32188900  | 0.47428600  |
| C | 0.25792200  | -1.85540600 | -1.10204000 | H     | -3.60414600 | -2.70952300 | -0.93686600 |
| C | 1.26913400  | -2.82553600 | -1.12644200 | C     | 1.22985200  | -1.04204000 | 2.81899600  |
| C | 1.05565500  | -4.11049600 | -0.62903200 | O     | 2.46461400  | -1.24674700 | 2.54856900  |
| H | -0.37397100 | -5.41618500 | 0.32168600  | O     | 0.50183900  | -0.55037400 | 1.90087100  |
| H | -2.15856500 | -3.72603900 | 0.37758800  | C     | 0.66201300  | -1.40635300 | 4.15862300  |
| H | 2.22295800  | -2.58379000 | -1.58158700 | H     | -0.17752600 | -0.75376000 | 4.40617500  |
| H | 1.85256800  | -4.84674200 | -0.66182500 | H     | 0.29142500  | -2.43673300 | 4.11270000  |
| C | 0.55327300  | -0.49610600 | -1.68164000 | H     | 1.43225100  | -1.35270400 | 4.93051600  |
| O | -0.07500300 | -0.06386800 | -2.64656400 | Co    | 2.19309500  | -0.55403300 | 0.71971900  |
| N | 1.57256400  | 0.15581000  | -1.00963800 | C     | 4.56625200  | -1.17670400 | -1.00383100 |
| C | -3.43351800 | -1.66157200 | -0.70031500 | O     | 4.03623700  | -1.26110500 | 0.11062700  |
| C | -4.58241100 | -0.83430700 | -0.58893500 | O     | 3.94864500  | -0.67844100 | -2.05556300 |
| C | -5.88109400 | -1.35740600 | -0.64642200 | H     | 3.02934800  | -0.38788100 | -1.76355100 |
| C | -4.38297300 | 0.65008800  | -0.37741000 | C     | 5.96823700  | -1.63293300 | -1.26391600 |
| C | -6.99209600 | -0.58663300 | -0.35160400 | H     | 5.98221800  | -2.32119200 | -2.11376400 |
| H | -6.01028700 | -2.41166100 | -0.88158000 | H     | 6.58329300  | -0.76787000 | -1.53291500 |
| C | -5.60912700 | 1.36701400  | 0.11781800  | H     | 6.37743500  | -2.11553200 | -0.37731200 |
| H | -4.13321900 | 1.07697000  | -1.37043200 | O     | -8.01193000 | 1.36520300  | 0.44997300  |
| C | -6.83316900 | 0.77801200  | 0.08192800  | C     | -7.95214700 | 2.70759700  | 0.90342700  |
| H | -7.99447600 | -0.99961500 | -0.37657100 | H     | -7.55897300 | 3.37854400  | 0.12829200  |
| H | -5.48055200 | 2.39528000  | 0.43590800  | H     | -8.97737600 | 2.99656200  | 1.14304300  |
| C | 1.79687500  | 1.53745400  | -1.17711600 | H     | -7.33027300 | 2.80154800  | 1.80337000  |
| C | 2.52572700  | 2.15892000  | -0.11085600 |       |             |             |             |
| C | 1.41098600  | 2.33030000  | -2.25135900 | 10s_Q |             |             |             |
| C | 2.85484400  | 3.54399300  | -0.15165300 | C     | -0.12679300 | -4.53656100 | -0.36964900 |
| C | 1.73328200  | 3.70704000  | -2.28090800 | C     | -1.13468700 | -3.58070200 | -0.28333300 |
| H | 0.85489600  | 1.88175100  | -3.06053900 | C     | -0.95074700 | -2.25766600 | -0.72901300 |
| C | 3.54653400  | 1.89401300  | 1.96538200  | C     | 0.31938400  | -1.91924000 | -1.25861000 |
| C | 3.57706800  | 4.07025500  | 0.94887500  | C     | 1.32478800  | -2.88894800 | -1.34844000 |
| C | 2.44142600  | 4.31413400  | -1.26775700 | C     | 1.11239500  | -4.19513100 | -0.90982200 |
| H | 1.41210500  | 4.29159800  | -3.13803200 | H     | -0.30774600 | -5.54377200 | -0.00591300 |
| C | 3.92350800  | 3.25270300  | 2.00173000  | H     | -2.08151500 | -3.84644000 | 0.17459600  |
| H | 3.78664300  | 1.21496900  | 2.77804200  | H     | 2.27348100  | -2.62769900 | -1.80450000 |
| H | 3.84670100  | 5.12261800  | 0.94903400  | H     | 1.90410300  | -4.93340000 | -0.99263600 |
| H | 2.68665400  | 5.37097700  | -1.30565400 | C     | 0.58707800  | -0.54529300 | -1.81945100 |
| H | 4.47306700  | 3.63272600  | 2.85574400  | O     | -0.05463100 | -0.13257400 | -2.78354300 |
| N | 2.87773000  | 1.37339600  | 0.95011100  | N     | 1.56801300  | 0.14710900  | -1.12810900 |
| C | -2.14510800 | -1.21650400 | -0.52230500 | C     | -3.35171600 | -1.69228900 | -0.78894700 |
| C | -3.12814200 | 0.87821300  | 0.48791400  | C     | -4.48228000 | -0.84791900 | -0.62131400 |
| C | -1.90480700 | 0.24078900  | -0.18035500 | C     | -5.79229000 | -1.33545900 | -0.70673700 |
| H | -2.95775000 | 1.95179700  | 0.62713200  | C     | -4.24545400 | 0.61577400  | -0.32243500 |
| H | -3.29180500 | 0.44064900  | 1.48010800  | C     | -6.88504100 | -0.55598400 | -0.36747500 |
| H | -1.67079600 | 0.79845300  | -1.09486900 | H     | -5.94659300 | -2.37106200 | -1.00185100 |

|    |             |             |             |       |             |             |             |
|----|-------------|-------------|-------------|-------|-------------|-------------|-------------|
| C  | -5.45524400 | 1.33443200  | 0.20923500  | H     | 6.14560900  | -2.43045100 | 0.34386600  |
| H  | -3.97652200 | 1.09348800  | -1.28680700 | O     | -7.85773700 | 1.37259800  | 0.54101000  |
| C  | -6.69324300 | 0.77792500  | 0.14092900  | C     | -7.76608600 | 2.68594500  | 1.06793400  |
| H  | -7.89704400 | -0.94263100 | -0.41475300 | H     | -7.35638200 | 3.38902700  | 0.33077600  |
| H  | -5.30266600 | 2.34007600  | 0.58404200  | H     | -8.78426200 | 2.98575200  | 1.32373000  |
| C  | 1.80477900  | 1.51274900  | -1.39366800 | H     | -7.14295600 | 2.71521800  | 1.97145500  |
| C  | 2.41396500  | 2.25567000  | -0.32634400 |       |             |             |             |
| C  | 1.53974700  | 2.18828600  | -2.57929200 | 10s_T |             |             |             |
| C  | 2.74541100  | 3.63327700  | -0.48553800 | C     | -0.11752900 | -4.53935900 | -0.36864800 |
| C  | 1.86381000  | 3.55652200  | -2.72711600 | C     | -1.12526600 | -3.58360700 | -0.28234800 |
| H  | 1.06925500  | 1.65373100  | -3.39025800 | C     | -0.94208900 | -2.26083700 | -0.72989700 |
| C  | 3.21441600  | 2.24952600  | 1.87076300  | C     | 0.32792500  | -1.92300000 | -1.26068400 |
| C  | 3.34610500  | 4.29009200  | 0.61625500  | C     | 1.33318500  | -2.89306200 | -1.35081800 |
| C  | 2.45725300  | 4.27608400  | -1.71543700 | C     | 1.12118200  | -4.19865400 | -0.91077800 |
| H  | 1.63732400  | 4.04033800  | -3.67258000 | H     | -0.29799700 | -5.54608100 | -0.00331200 |
| C  | 3.58303700  | 3.60567000  | 1.78837200  | H     | -2.07136900 | -3.84905400 | 0.17719100  |
| H  | 3.36005800  | 1.66471300  | 2.77299200  | H     | 2.28166900  | -2.63198600 | -1.80749700 |
| H  | 3.61193300  | 5.33928200  | 0.52208500  | H     | 1.91277000  | -4.93705800 | -0.99350700 |
| H  | 2.70707400  | 5.32522000  | -1.83856300 | C     | 0.59543300  | -0.55033800 | -1.82530800 |
| H  | 4.03931400  | 4.08954300  | 2.64446900  | O     | -0.04026900 | -0.14342200 | -2.79577400 |
| N  | 2.65562400  | 1.60751200  | 0.85434700  | N     | 1.56956900  | 0.14684700  | -1.12965500 |
| C  | -2.05529600 | -1.28878300 | -0.58461000 | C     | -3.34403600 | -1.69845200 | -0.78401000 |
| C  | -2.99257700 | 0.75812200  | 0.56429500  | C     | -4.47450200 | -0.85408600 | -0.61847200 |
| C  | -1.77765200 | 0.13038900  | -0.12851400 | C     | -5.78454400 | -1.34349500 | -0.69647000 |
| H  | -2.79683700 | 1.81640500  | 0.77152400  | C     | -4.23849100 | 0.61194700  | -0.33054500 |
| H  | -3.17695800 | 0.26396700  | 1.52566300  | C     | -6.87669800 | -0.56298900 | -0.35851300 |
| H  | -1.50158400 | 0.74927100  | -0.99123100 | H     | -5.93879400 | -2.38113000 | -0.98436600 |
| H  | -0.92368500 | 0.12856800  | 0.55318600  | C     | -5.44704700 | 1.33267200  | 0.20117800  |
| H  | -3.54346600 | -2.71794600 | -1.09668600 | H     | -3.97444100 | 1.08337000  | -1.29935300 |
| C  | 1.26809000  | -0.90816900 | 3.10669600  | C     | -6.68460100 | 0.77444700  | 0.14078800  |
| O  | 2.47063700  | -0.54707400 | 3.05005100  | H     | -7.88848200 | -0.95090200 | -0.39982900 |
| O  | 0.57487800  | -0.97466300 | 2.02162500  | H     | -5.29417100 | 2.34081600  | 0.56908900  |
| C  | 0.60326000  | -1.28543600 | 4.40418300  | C     | 1.80419800  | 1.51253600  | -1.39636700 |
| H  | -0.34748900 | -0.75378100 | 4.50301600  | C     | 2.40603500  | 2.25854100  | -0.32703500 |
| H  | 0.37700600  | -2.35687100 | 4.39146300  | C     | 1.54305000  | 2.18559500  | -2.58423500 |
| H  | 1.24991600  | -1.06234200 | 5.25364800  | C     | 2.73439900  | 3.63682700  | -0.48647800 |
| Co | 2.04437800  | -0.36043300 | 0.81899600  | C     | 1.86405000  | 3.55453400  | -2.73231500 |
| C  | 4.47220000  | -1.43457800 | -0.52819600 | H     | 1.07802000  | 1.64848600  | -3.39668300 |
| O  | 3.82432700  | -1.42487500 | 0.52818200  | C     | 3.19544600  | 2.25751000  | 1.87401200  |
| O  | 4.04370100  | -0.88583500 | -1.64597500 | C     | 3.32763300  | 4.29684300  | 0.61746200  |
| H  | 3.11115300  | -0.51536800 | -1.50430000 | C     | 2.45051200  | 4.27710600  | -1.71870600 |
| C  | 5.81231200  | -2.09245100 | -0.63633500 | H     | 1.64085800  | 4.03646300  | -3.67952600 |
| H  | 5.73767400  | -2.94596500 | -1.31817100 | C     | 3.56055400  | 3.61462800  | 1.79166000  |
| H  | 6.53519100  | -1.39324300 | -1.06592900 | H     | 3.33835100  | 1.67423500  | 2.77766900  |

|        |             |             |             |   |             |             |             |
|--------|-------------|-------------|-------------|---|-------------|-------------|-------------|
| H      | 3.59094900  | 5.34666200  | 0.52324000  | H | 1.85123900  | -4.84156400 | -0.65392500 |
| H      | 2.69798000  | 5.32677600  | -1.84204400 | C | 0.55142500  | -0.49304300 | -1.68050000 |
| H      | 4.01110200  | 4.10091400  | 2.64942400  | O | -0.07857300 | -0.05745700 | -2.64281000 |
| N      | 2.64355000  | 1.61255600  | 0.85569000  | N | 1.57423600  | 0.15544700  | -1.01029900 |
| C      | -2.04684300 | -1.29238300 | -0.58749600 | C | -3.43789100 | -1.65902800 | -0.70429000 |
| C      | -2.98216200 | 0.76200900  | 0.54978300  | C | -4.58657000 | -0.83183300 | -0.59169800 |
| C      | -1.76950900 | 0.13071500  | -0.14372000 | C | -5.88542500 | -1.35453400 | -0.65117800 |
| H      | -2.78665400 | 1.82193800  | 0.74864200  | C | -4.38698300 | 0.65205200  | -0.37660800 |
| H      | -3.16173100 | 0.27442700  | 1.51540100  | C | -6.99633500 | -0.58428600 | -0.35503300 |
| H      | -1.49813100 | 0.74343400  | -1.01230800 | H | -6.01469300 | -2.40818400 | -0.88898900 |
| H      | -0.91279100 | 0.13566900  | 0.53436900  | C | -5.61324900 | 1.36798600  | 0.11982700  |
| H      | -3.53618500 | -2.72629500 | -1.08397700 | H | -4.13678300 | 1.08122400  | -1.36852400 |
| C      | 1.25682200  | -0.90312200 | 3.10743700  | C | -6.83734900 | 0.77930500  | 0.08195500  |
| O      | 2.45845600  | -0.53882400 | 3.05345400  | H | -7.99879700 | -0.99698200 | -0.38147000 |
| O      | 0.56638600  | -0.97270600 | 2.02075400  | H | -5.48461700 | 2.39543300  | 0.44052700  |
| C      | 0.58966900  | -1.28090500 | 4.40360900  | C | 1.80061600  | 1.53689700  | -1.17683400 |
| H      | -0.36265000 | -0.75154300 | 4.49960700  | C | 2.53021800  | 2.15662600  | -0.11017500 |
| H      | 0.36612800  | -2.35291300 | 4.39128500  | C | 1.41625000  | 2.33100700  | -2.25068600 |
| H      | 1.23362900  | -1.05542800 | 5.25449500  | C | 2.86178700  | 3.54112600  | -0.15003600 |
| Co     | 2.03634700  | -0.35693500 | 0.82006500  | C | 1.74091800  | 3.70722200  | -2.27939900 |
| C      | 4.47053300  | -1.43337800 | -0.51484800 | H | 0.85944100  | 1.88398000  | -3.06020300 |
| O      | 3.81727800  | -1.42219900 | 0.53814600  | C | 3.55002500  | 1.88855600  | 1.96619300  |
| O      | 4.04835000  | -0.88489000 | -1.63518500 | C | 3.58479000  | 4.06535700  | 0.95093700  |
| H      | 3.11532600  | -0.51415300 | -1.49834100 | C | 2.44992400  | 4.31258000  | -1.26580300 |
| C      | 5.81054800  | -2.09259900 | -0.61581200 | H | 1.42092100  | 4.29279200  | -3.13627400 |
| H      | 5.73804100  | -2.94739300 | -1.29629300 | C | 3.92954000  | 3.24650900  | 2.00336100  |
| H      | 6.53591000  | -1.39488800 | -1.04365700 | H | 3.78855700  | 1.20852000  | 2.77847600  |
| H      | 6.13927300  | -2.42905800 | 0.36646200  | H | 3.85640600  | 5.11720900  | 0.95180200  |
| O      | -7.84836100 | 1.37023700  | 0.54123400  | H | 2.69700400  | 5.36901000  | -1.30313200 |
| C      | -7.75630400 | 2.68688900  | 1.05982400  | H | 4.47965200  | 3.62501200  | 2.85769100  |
| H      | -7.35000900 | 3.38592200  | 0.31695000  | N | 2.88051200  | 1.36986900  | 0.95039000  |
| H      | -8.77388500 | 2.98713100  | 1.31745200  | C | -2.14943000 | -1.21445500 | -0.52482100 |
| H      | -7.12994200 | 2.72230900  | 1.96088400  | C | -3.13254000 | 0.87800600  | 0.48981200  |
|        |             |             |             | C | -1.90896600 | 0.24186900  | -0.17929600 |
| 10s_T' |             |             |             | H | -2.96204700 | 1.95124100  | 0.63156500  |
| C      | -0.19477200 | -4.42566400 | -0.09139400 | H | -3.29679300 | 0.43822600  | 1.48093200  |
| C      | -1.21017800 | -3.47392400 | -0.07906300 | H | -1.67402100 | 0.80159900  | -1.09233000 |
| C      | -1.02883100 | -2.17299600 | -0.59039200 | H | -1.03942600 | 0.32104100  | 0.47606100  |
| C      | 0.25458800  | -1.85233200 | -1.10206100 | H | -3.60853400 | -2.70647900 | -0.94307700 |
| C      | 1.26693100  | -2.82142100 | -1.12220100 | C | 1.23122000  | -1.04298300 | 2.81883200  |
| C      | 1.05336600  | -4.10623000 | -0.62424000 | O | 2.46586200  | -1.24841900 | 2.54771500  |
| H      | -0.37811500 | -5.41298900 | 0.32225700  | O | 0.50266000  | -0.55149200 | 1.90125300  |
| H      | -2.16439300 | -3.72449900 | 0.37168400  | C | 0.66464400  | -1.40652000 | 4.15927300  |
| H      | 2.22157900  | -2.57952200 | -1.57541700 | H | -0.17520500 | -0.75435900 | 4.40688900  |

|          |             |             |             |    |             |             |             |
|----------|-------------|-------------|-------------|----|-------------|-------------|-------------|
| H        | 0.29487000  | -2.43724700 | 4.11461200  | C  | 1.85054400  | 1.97533300  | -2.53320600 |
| H        | 1.43541700  | -1.35159800 | 4.93055100  | C  | 3.28258600  | 3.38536200  | -0.56311700 |
| Co       | 2.19478200  | -0.55622600 | 0.71880700  | C  | 2.26905600  | 3.30808700  | -2.75378200 |
| C        | 4.56784100  | -1.17808400 | -1.00678200 | H  | 1.30635800  | 1.45092700  | -3.30574500 |
| O        | 4.03905600  | -1.26343400 | 0.10814900  | C  | 3.81216300  | 2.01495300  | 1.78175000  |
| O        | 3.94865600  | -0.68009100 | -2.05774800 | C  | 4.00890500  | 4.02008500  | 0.47577600  |
| H        | 3.02953200  | -0.38976500 | -1.76474500 | C  | 2.96823900  | 4.00785100  | -1.79644300 |
| C        | 5.96999700  | -1.63289100 | -1.26865100 | H  | 2.03264400  | 3.77733400  | -3.70368700 |
| H        | 5.98362800  | -2.32097400 | -2.11865200 | C  | 4.27435100  | 3.34157300  | 1.64341600  |
| H        | 6.58388700  | -0.76719000 | -1.53824300 | H  | 3.99853500  | 1.44461500  | 2.68724800  |
| H        | 6.38074400  | -2.11527400 | -0.38264400 | H  | 4.34947100  | 5.04198600  | 0.33496300  |
| O        | -8.01618000 | 1.36572900  | 0.45098100  | H  | 3.28906100  | 5.03022100  | -1.97142300 |
| C        | -7.95632300 | 2.70683100  | 0.90823900  | H  | 4.82791300  | 3.80324800  | 2.45335200  |
| H        | -7.56263700 | 3.37987900  | 0.13518900  | N  | 3.13391600  | 1.39562300  | 0.83251100  |
| H        | -8.98160000 | 2.99534600  | 1.14818900  | C  | -2.32692700 | -1.12058100 | -0.38890600 |
| H        | -7.33484200 | 2.79809800  | 1.80872900  | C  | -3.44058300 | 0.73277000  | 0.91214100  |
|          |             |             |             | C  | -2.13083800 | 0.20885300  | 0.31091700  |
| TS6s_OSS |             |             |             | H  | -3.28847900 | 1.74231800  | 1.31065600  |
| C        | -0.55231800 | -4.44191900 | -0.14901800 | H  | -3.76415200 | 0.09719900  | 1.74565200  |
| C        | -1.51009700 | -3.43353600 | -0.10653400 | H  | -1.75075800 | 0.94588100  | -0.40561600 |
| C        | -1.22726400 | -2.10717100 | -0.48877000 | H  | -1.36184800 | 0.10937300  | 1.08081000  |
| C        | 0.10027700  | -1.81839700 | -0.90452900 | H  | -3.71210900 | -2.44368200 | -1.31032400 |
| C        | 1.05377000  | -2.84717700 | -0.95438200 | C  | 1.31063400  | -0.63304100 | 2.93457200  |
| C        | 0.73978800  | -4.15169500 | -0.58372400 | O  | 2.50381100  | -1.05338600 | 2.76704500  |
| H        | -0.81571900 | -5.44890800 | 0.16099000  | O  | 0.71124300  | -0.16295200 | 1.90989000  |
| H        | -2.50597900 | -3.65988000 | 0.25886700  | C  | 0.62449600  | -0.70944100 | 4.26470600  |
| H        | 2.04393800  | -2.63887700 | -1.33814600 | H  | 0.04279700  | 0.19901000  | 4.43927000  |
| H        | 1.49627800  | -4.92797700 | -0.63972500 | H  | -0.07290500 | -1.55455800 | 4.25295300  |
| C        | 0.47275300  | -0.45052300 | -1.39059300 | H  | 1.34921300  | -0.85995600 | 5.06617100  |
| O        | -0.31091300 | 0.23930700  | -2.02400600 | Co | 2.36465000  | -0.54549600 | 0.84324300  |
| N        | 1.78224100  | -0.02340100 | -1.04192500 | C  | 4.45249200  | -1.55845300 | -0.89584400 |
| C        | -3.57583400 | -1.47353500 | -0.83680900 | O  | 4.05488800  | -1.39459200 | 0.29040400  |
| C        | -4.72517100 | -0.64495100 | -0.71729200 | O  | 3.76804100  | -1.23434200 | -1.93020000 |
| C        | -6.00326000 | -1.09320900 | -1.07119700 | H  | 2.72234500  | -0.69356800 | -1.54417300 |
| C        | -4.54633000 | 0.75063600  | -0.16262500 | C  | 5.80959600  | -2.16499700 | -1.13392200 |
| C        | -7.14070900 | -0.35714400 | -0.78414200 | H  | 5.72733400  | -2.98018200 | -1.85799300 |
| H        | -6.10408100 | -2.06891600 | -1.54156200 | H  | 6.46691200  | -1.40550500 | -1.57047100 |
| C        | -5.82778900 | 1.39879600  | 0.28486700  | H  | 6.24215000  | -2.52788100 | -0.20157600 |
| H        | -4.13763000 | 1.36716200  | -0.98921100 | O  | -8.25333900 | 1.42602700  | 0.25132000  |
| C        | -7.03751500 | 0.88000600  | -0.05432000 | C  | -8.25187700 | 2.64281500  | 0.97968500  |
| H        | -8.13109200 | -0.71566200 | -1.04200500 | H  | -7.73887500 | 3.44226900  | 0.42903200  |
| H        | -5.74065800 | 2.33307800  | 0.82767000  | H  | -9.29908600 | 2.91768500  | 1.12039500  |
| C        | 2.12125300  | 1.33861500  | -1.33598000 | H  | -7.77427900 | 2.52440400  | 1.96118900  |
| C        | 2.85464100  | 2.04356900  | -0.33683700 |    |             |             |             |

|        |             |             |             |             |             |             |             |
|--------|-------------|-------------|-------------|-------------|-------------|-------------|-------------|
| TS6s_Q |             |             | H           | -2.80726600 | 1.67161600  | 1.02288300  |             |
| C      | -0.21481000 | -4.59231400 | -0.48614300 | H           | -3.25893000 | 0.05596700  | 1.57890100  |
| C      | -1.19652600 | -3.60965400 | -0.40284200 | H           | -1.43593200 | 0.77182200  | -0.77581300 |
| C      | -0.95303900 | -2.27501500 | -0.77888300 | H           | -0.94843100 | -0.02232500 | 0.72118100  |
| C      | 0.35170100  | -1.95587900 | -1.23538800 | H           | -3.51996700 | -2.62291900 | -1.35287000 |
| C      | 1.33512200  | -2.95026900 | -1.31323500 | C           | 1.14898400  | -0.75886600 | 3.18149100  |
| C      | 1.06010300  | -4.26569300 | -0.94642000 | O           | 2.24997500  | -0.15926700 | 3.23121200  |
| H      | -0.44388500 | -5.60879300 | -0.17978000 | O           | 0.62396400  | -1.03653100 | 2.03414900  |
| H      | -2.17198100 | -3.86355400 | -0.00206300 | C           | 0.41037000  | -1.19002100 | 4.42107700  |
| H      | 2.31748100  | -2.70095400 | -1.69675100 | H           | -0.63559300 | -0.87637400 | 4.35906000  |
| H      | 1.83340400  | -5.02380700 | -1.02218400 | H           | 0.41936100  | -2.28362700 | 4.47971300  |
| C      | 0.66378900  | -0.57677600 | -1.73527700 | H           | 0.87634600  | -0.77670300 | 5.31635300  |
| O      | -0.07132300 | -0.00189000 | -2.52500100 | Co          | 2.08211200  | -0.25953500 | 0.93417500  |
| N      | 1.82511400  | 0.00192200  | -1.18211000 | C           | 4.42925700  | -1.54115300 | -0.21769400 |
| C      | -3.32891400 | -1.63670400 | -0.93507000 | O           | 3.81060500  | -1.30612500 | 0.85743900  |
| C      | -4.45195500 | -0.78599600 | -0.74729500 | O           | 4.02333400  | -1.17391900 | -1.37854200 |
| C      | -5.76298500 | -1.22917600 | -0.96063500 | H           | 2.92039200  | -0.64687600 | -1.31093000 |
| C      | -4.20666400 | 0.63139000  | -0.27956800 | C           | 5.70640000  | -2.33479700 | -0.15957000 |
| C      | -6.85985100 | -0.46234000 | -0.60574500 | H           | 5.45542600  | -3.39676100 | -0.26633400 |
| H      | -5.91811400 | -2.22391100 | -1.37267100 | H           | 6.37062800  | -2.05913800 | -0.98036200 |
| C      | -5.43321900 | 1.32047900  | 0.25257600  | H           | 6.19927800  | -2.19553000 | 0.80355400  |
| H      | -3.86930200 | 1.20160900  | -1.16925400 | O           | -7.85062700 | 1.38487700  | 0.44120900  |
| C      | -6.67497900 | 0.80586900  | 0.05146000  | C           | -7.76787800 | 2.63399700  | 1.10749600  |
| H      | -7.87407400 | -0.81634700 | -0.75373000 | H           | -7.29998200 | 3.39911400  | 0.47404300  |
| H      | -5.28514700 | 2.27750600  | 0.73967400  | H           | -8.79434400 | 2.93091000  | 1.33137100  |
| C      | 2.09633800  | 1.36192600  | -1.52633800 | H           | -7.20214300 | 2.55407600  | 2.04503000  |
| C      | 2.44851800  | 2.24438300  | -0.46300200 |             |             |             |             |
| C      | 2.08034700  | 1.85399100  | -2.81827000 | TS6s_T      |             |             |             |
| C      | 2.76639700  | 3.60890600  | -0.73263600 | C           | -0.21318900 | -4.59217800 | -0.48589400 |
| C      | 2.39211700  | 3.20663000  | -3.08507300 | C           | -1.19454600 | -3.60931400 | -0.40262300 |
| H      | 1.81606500  | 1.19333800  | -3.63296500 | C           | -0.95109400 | -2.27476800 | -0.77957500 |
| C      | 2.79428100  | 2.54885800  | 1.82804800  | C           | 0.35376700  | -1.95617000 | -1.23642600 |
| C      | 3.10398900  | 4.43069200  | 0.37054700  | C           | 1.33682100  | -2.95104500 | -1.31449700 |
| C      | 2.72796300  | 4.07417300  | -2.07049900 | C           | 1.06161800  | -4.26618800 | -0.94715900 |
| H      | 2.36525400  | 3.55650700  | -4.11213200 | H           | -0.44233700 | -5.60840000 | -0.17872800 |
| C      | 3.11734900  | 3.90751300  | 1.64441100  | H           | -2.16972600 | -3.86289500 | -0.00101300 |
| H      | 2.79134100  | 2.08326300  | 2.80783800  | H           | 2.31912800  | -2.70202800 | -1.69834700 |
| H      | 3.34968200  | 5.47418800  | 0.19485500  | H           | 1.83463400  | -5.02457800 | -1.02303800 |
| H      | 2.96721700  | 5.11282000  | -2.27636400 | C           | 0.66666800  | -0.57766300 | -1.73769700 |
| H      | 3.37240700  | 4.51602900  | 2.50442300  | O           | -0.06648500 | -0.00397300 | -2.53006500 |
| N      | 2.47368000  | 1.75449100  | 0.81647100  | N           | 1.82664300  | 0.00165200  | -1.18245000 |
| C      | -2.04001500 | -1.28628000 | -0.61797700 | C           | -3.32765200 | -1.63848400 | -0.93262000 |
| C      | -3.00783200 | 0.64676700  | 0.68982500  | C           | -4.45066300 | -0.78780300 | -0.74589000 |
| C      | -1.76522500 | 0.07106300  | 0.00035400  | C           | -5.76191500 | -1.23268200 | -0.95509700 |

|    |             |             |             |         |             |             |             |
|----|-------------|-------------|-------------|---------|-------------|-------------|-------------|
| C  | -4.20556300 | 0.63155500  | -0.28410100 | C       | 5.70185400  | -2.34036100 | -0.14997800 |
| C  | -6.85849200 | -0.46538300 | -0.60073600 | H       | 5.44901100  | -3.40204200 | -0.25513700 |
| H  | -5.91714800 | -2.22900200 | -1.36323600 | H       | 6.36810900  | -2.06742800 | -0.97001700 |
| C  | -5.43147600 | 1.32159200  | 0.24830600  | H       | 6.19325800  | -2.20037500 | 0.81381600  |
| H  | -3.87102000 | 1.19868300  | -1.17682300 | O       | -7.84854400 | 1.38483300  | 0.44157700  |
| C  | -6.67323700 | 0.80536100  | 0.05157100  | C       | -7.76548400 | 2.63669800  | 1.10267100  |
| H  | -7.87277100 | -0.82061400 | -0.74538500 | H       | -7.29946300 | 3.39959900  | 0.46518000  |
| H  | -5.28310000 | 2.28048400  | 0.73162200  | H       | -8.79174500 | 2.93368200  | 1.32738300  |
| C  | 2.09874700  | 1.36143800  | -1.52678200 | H       | -7.19783000 | 2.56103100  | 2.03939600  |
| C  | 2.44949500  | 2.24408100  | -0.46313000 |         |             |             |             |
| C  | 2.08499000  | 1.85303700  | -2.81891100 | TS6s_T' |             |             |             |
| C  | 2.76830000  | 3.60839600  | -0.73271400 | C       | -0.47304700 | -4.41437300 | -0.07140600 |
| C  | 2.39764900  | 3.20549000  | -3.08563600 | C       | -1.44530000 | -3.41926200 | -0.04930200 |
| H  | 1.82179200  | 1.19219400  | -3.63379100 | C       | -1.18659200 | -2.10137400 | -0.47615400 |
| C  | 2.79153700  | 2.54923600  | 1.82836900  | C       | 0.13098400  | -1.80850200 | -0.91721000 |
| C  | 3.10432700  | 4.43046700  | 0.37073700  | C       | 1.09977000  | -2.82346700 | -0.94684700 |
| C  | 2.73217400  | 4.07322900  | -2.07079900 | C       | 0.80939900  | -4.12018700 | -0.53176700 |
| H  | 2.37255400  | 3.55505300  | -4.11284600 | H       | -0.71761300 | -5.41443400 | 0.27429900  |
| C  | 3.11537100  | 3.90772100  | 1.64479300  | H       | -2.43295500 | -3.64830300 | 0.33621700  |
| H  | 2.78682200  | 2.08397500  | 2.80830800  | H       | 2.07970500  | -2.61346800 | -1.35471600 |
| H  | 3.35066300  | 5.47381800  | 0.19508700  | H       | 1.57628600  | -4.88709400 | -0.57281700 |
| H  | 2.97208700  | 5.11173400  | -2.27660900 | C       | 0.48829000  | -0.44737500 | -1.43152300 |
| H  | 3.36921900  | 4.51643700  | 2.50502100  | O       | -0.29267800 | 0.21806400  | -2.09285400 |
| N  | 2.47233700  | 1.75460300  | 0.81655600  | N       | 1.78650400  | 0.00034900  | -1.06519900 |
| C  | -2.03805600 | -1.28611300 | -0.61974200 | C       | -3.54834600 | -1.50722600 | -0.80456500 |
| C  | -3.00432200 | 0.65170500  | 0.68214000  | C       | -4.70472300 | -0.68714100 | -0.69579900 |
| C  | -1.76308900 | 0.07428000  | -0.00838600 | C       | -5.98344000 | -1.16149000 | -1.01155400 |
| H  | -2.80365100 | 1.67802000  | 1.01058100  | C       | -4.53225700 | 0.72980800  | -0.19602400 |
| H  | -3.25255900 | 0.06421800  | 1.57420500  | C       | -7.12397900 | -0.42693600 | -0.73325000 |
| H  | -1.43684300 | 0.77190000  | -0.78864400 | H       | -6.08117500 | -2.15505100 | -1.44364600 |
| H  | -0.94425000 | -0.01483800 | 0.71063900  | C       | -5.81326800 | 1.38090000  | 0.24843600  |
| H  | -3.51916300 | -2.62635000 | -1.34623300 | H       | -4.14406600 | 1.31949500  | -1.05159500 |
| C  | 1.14297700  | -0.75504100 | 3.18207200  | C       | -7.02255600 | 0.83761900  | -0.05167600 |
| O  | 2.24478700  | -0.15701500 | 3.23203100  | H       | -8.11444800 | -0.80489300 | -0.96129200 |
| O  | 0.61810100  | -1.03264000 | 2.03467300  | H       | -5.72747200 | 2.33545200  | 0.75500600  |
| C  | 0.40331000  | -1.18470800 | 4.42156700  | C       | 2.10111300  | 1.37506000  | -1.32262300 |
| H  | -0.64293600 | -0.87240600 | 4.35784500  | C       | 2.80718300  | 2.06868500  | -0.29555000 |
| H  | 0.41358200  | -2.27820500 | 4.48220300  | C       | 1.82915300  | 2.03710300  | -2.50570300 |
| H  | 0.86788000  | -0.76936100 | 5.31664100  | C       | 3.20920800  | 3.42440100  | -0.48241100 |
| Co | 2.07817500  | -0.25903100 | 0.93466300  | C       | 2.22115300  | 3.38404500  | -2.68604200 |
| C  | 4.42630100  | -1.54437900 | -0.21164500 | H       | 1.30472900  | 1.52136300  | -3.29738000 |
| O  | 3.80453500  | -1.30946200 | 0.86172300  | C       | 3.73987400  | 2.00583000  | 1.83294400  |
| O  | 4.02484100  | -1.17512900 | -1.37336700 | C       | 3.91052800  | 4.04720600  | 0.58070900  |
| H  | 2.92158200  | -0.64720900 | -1.30842700 | C       | 2.89525700  | 4.07229800  | -1.70285800 |

|         |             |             |             |   |             |             |             |
|---------|-------------|-------------|-------------|---|-------------|-------------|-------------|
| H       | 1.98508100  | 3.87349100  | -3.62579300 | H | 0.96981400  | 5.55521200  | -0.04761500 |
| C       | 4.17667300  | 3.34460600  | 1.73376700  | H | 2.64533300  | 3.74911000  | 0.06479100  |
| H       | 3.92683400  | 1.41702800  | 2.72650900  | H | -2.02961700 | 2.70269300  | -1.11811300 |
| H       | 4.23152800  | 5.07906000  | 0.46956300  | H | -1.40335500 | 5.00962400  | -0.61629500 |
| H       | 3.19676900  | 5.10527000  | -1.84742700 | C | -0.45310900 | 0.49135000  | -1.18351700 |
| H       | 4.71134800  | 3.79661600  | 2.56166600  | O | 0.33555800  | -0.34253900 | -1.58575000 |
| N       | 3.08529300  | 1.39697600  | 0.86071400  | N | -1.84755700 | 0.16444700  | -1.03042500 |
| C       | -2.29609700 | -1.12467600 | -0.39146200 | C | 3.58874300  | 1.41876400  | -0.93836500 |
| C       | -3.40886400 | 0.76322500  | 0.85985100  | C | 4.72959900  | 0.57953300  | -0.80109600 |
| C       | -2.10332000 | 0.23148500  | 0.25630800  | C | 5.97356700  | 0.92075000  | -1.34301500 |
| H       | -3.26146300 | 1.78825800  | 1.21855800  | C | 4.57715100  | -0.70528800 | -0.01802800 |
| H       | -3.71129400 | 0.15531000  | 1.72143300  | C | 7.11797700  | 0.19299300  | -1.06003300 |
| H       | -1.74323100 | 0.94634200  | -0.49228600 | H | 6.04702200  | 1.80942000  | -1.96610000 |
| H       | -1.32180600 | 0.16687900  | 1.01737100  | C | 5.88240400  | -1.33255800 | 0.38750000  |
| H       | -3.68164100 | -2.49527200 | -1.24038000 | H | 4.06078000  | -1.42282900 | -0.68775700 |
| C       | 1.30542400  | -0.66513900 | 2.89548100  | C | 7.06218300  | -0.91762700 | -0.14545400 |
| O       | 2.48395500  | -1.12091700 | 2.71600100  | H | 8.08417600  | 0.47075800  | -1.46645800 |
| O       | 0.71925600  | -0.15157600 | 1.88508400  | H | 5.83062900  | -2.17278800 | 1.07042700  |
| C       | 0.62056300  | -0.75215200 | 4.22614500  | C | -2.24439000 | -1.14259100 | -1.49877500 |
| H       | 0.04826500  | 0.15922600  | 4.41511200  | C | -2.90324000 | -1.99735800 | -0.57652300 |
| H       | -0.08457100 | -1.59071700 | 4.20391200  | C | -2.04387100 | -1.56443500 | -2.79449000 |
| H       | 1.34494800  | -0.92224800 | 5.02411600  | C | -3.34374000 | -3.28862000 | -0.99172100 |
| Co      | 2.36428300  | -0.56512300 | 0.80280800  | C | -2.47792700 | -2.84512900 | -3.20808600 |
| C       | 4.45262800  | -1.53816700 | -0.94788400 | H | -1.54234100 | -0.91071900 | -3.49824400 |
| O       | 4.03887900  | -1.41481900 | 0.23880400  | C | -3.72245100 | -2.31872700 | 1.57105200  |
| O       | 3.78466800  | -1.17211700 | -1.97801100 | C | -4.00034100 | -4.09236400 | -0.02560300 |
| H       | 2.73415400  | -0.64366200 | -1.58435900 | C | -3.11235500 | -3.69484100 | -2.32958600 |
| C       | 5.80676800  | -2.14987900 | -1.18761800 | H | -2.30447200 | -3.15299300 | -4.23405400 |
| H       | 5.72124200  | -2.95480600 | -1.92294000 | C | -4.18867200 | -3.61295200 | 1.25029300  |
| H       | 6.47141600  | -1.38988900 | -1.61162900 | H | -3.85723600 | -1.90347700 | 2.56565800  |
| H       | 6.23191500  | -2.52949900 | -0.25861300 | H | -4.34954200 | -5.08136200 | -0.30818300 |
| O       | -8.23919300 | 1.38231300  | 0.25293000  | H | -3.44560800 | -4.67805800 | -2.64769100 |
| C       | -8.23943000 | 2.62548000  | 0.93534900  | H | -4.68810100 | -4.20417700 | 2.00953200  |
| H       | -7.74405100 | 3.40907700  | 0.34703900  | N | -3.10778900 | -1.54507000 | 0.69536700  |
| H       | -9.28721800 | 2.89457400  | 1.08275300  | C | 2.38792500  | 1.17812900  | -0.32124200 |
| H       | -7.74504400 | 2.54891300  | 1.91268500  | C | 3.60096100  | -0.47200900 | 1.15360300  |
|         |             |             |             | C | 2.24359900  | -0.00006600 | 0.61954900  |
| 11s_OSS |             |             |             | H | 3.47303500  | -1.39798500 | 1.72568000  |
| C       | 0.67429700  | 4.53192400  | -0.25995000 | H | 4.03182900  | 0.27504700  | 1.83148500  |
| C       | 1.62243300  | 3.51483500  | -0.20991900 | H | 1.75720600  | -0.82936200 | 0.09531400  |
| C       | 1.29603900  | 2.16947400  | -0.46417500 | H | 1.56809800  | 0.26128700  | 1.43798400  |
| C       | -0.05721400 | 1.87304900  | -0.78710900 | H | 3.68994800  | 2.29808900  | -1.57160600 |
| C       | -1.00559200 | 2.91005500  | -0.83163900 | C | -1.29955600 | 0.20449500  | 3.00186000  |
| C       | -0.65079600 | 4.22907500  | -0.56948200 | O | -2.48159500 | 0.67656000  | 2.95944900  |



|       |             |             |             |    |             |             |             |
|-------|-------------|-------------|-------------|----|-------------|-------------|-------------|
| O     | -0.75965600 | -0.12885000 | 1.89154700  | H  | 5.64354100  | -2.12236500 | 1.19023500  |
| C     | -0.54771400 | 0.06535300  | 4.29204500  | C  | -2.37447600 | -1.05842300 | -1.65155800 |
| H     | 0.02797900  | -0.86331000 | 4.29395000  | C  | -2.87196200 | -2.03670800 | -0.75253200 |
| H     | 0.16044300  | 0.89732200  | 4.37816000  | C  | -2.35895500 | -1.32911500 | -3.00289700 |
| H     | -1.23005300 | 0.09532900  | 5.14286000  | C  | -3.33957500 | -3.28980700 | -1.24817400 |
| Co    | -2.43338000 | 0.42094400  | 0.95320200  | C  | -2.82818200 | -2.56625500 | -3.49977500 |
| C     | -4.51805900 | 1.76816100  | -0.56871700 | H  | -1.97169800 | -0.58270100 | -3.68739400 |
| O     | -4.07514100 | 1.34243700  | 0.56011900  | C  | -3.33811700 | -2.66110300 | 1.44932100  |
| O     | -3.90588300 | 1.69521200  | -1.66206000 | C  | -3.81313500 | -4.23165100 | -0.30177000 |
| H     | -2.54784200 | 0.87908100  | -1.39680200 | C  | -3.30740600 | -3.53226700 | -2.64392900 |
| C     | -5.88823100 | 2.41144100  | -0.51929200 | H  | -2.80350000 | -2.74913300 | -4.56894700 |
| H     | -6.19632600 | 2.74415900  | -1.51106500 | C  | -3.80839300 | -3.92415700 | 1.04065200  |
| H     | -6.61565500 | 1.69521500  | -0.12490100 | H  | -3.31772500 | -2.36876600 | 2.49427500  |
| H     | -5.86818100 | 3.26294700  | 0.16817500  | H  | -4.17548800 | -5.19415000 | -0.65104500 |
| O     | 8.28933500  | -1.46116200 | 0.11524300  | H  | -3.66451400 | -4.48558900 | -3.02093700 |
| C     | 8.33434200  | -2.55857100 | 1.01252700  | H  | -4.16244400 | -4.62783400 | 1.78492500  |
| H     | 7.74864800  | -3.40904400 | 0.63948300  | N  | -2.89351300 | -1.75560800 | 0.58755600  |
| H     | 9.38368200  | -2.85020500 | 1.08829800  | C  | 2.30305600  | 1.18174000  | -0.53205500 |
| H     | 7.96369700  | -2.28083300 | 2.00796100  | C  | 3.42653700  | -0.41028200 | 1.07068300  |
|       |             |             |             | C  | 2.10101000  | 0.04594600  | 0.45004000  |
| 11s_Q |             |             |             | H  | 3.26247800  | -1.30290200 | 1.68563200  |
| C     | 0.67689800  | 4.57550700  | -0.71355200 | H  | 3.83479500  | 0.36851200  | 1.72642700  |
| C     | 1.60163300  | 3.54248800  | -0.59626400 | H  | 1.64021900  | -0.80300700 | -0.06741100 |
| C     | 1.24051000  | 2.19065800  | -0.74732000 | H  | 1.38900400  | 0.35396100  | 1.22000300  |
| C     | -0.12287900 | 1.90483800  | -1.03320700 | H  | 3.67398400  | 2.20974700  | -1.78885200 |
| C     | -1.04781900 | 2.95552800  | -1.13852000 | C  | -1.07175300 | 0.26315800  | 3.19437200  |
| C     | -0.65919900 | 4.28211800  | -0.98038700 | O  | -2.19421400 | -0.27822900 | 3.35579200  |
| H     | 0.99895400  | 5.60442800  | -0.58192200 | O  | -0.72122900 | 0.68181700  | 2.02062100  |
| H     | 2.63115800  | 3.77294500  | -0.34427900 | C  | -0.09700600 | 0.44376200  | 4.32685500  |
| H     | -2.08592400 | 2.75096800  | -1.37090900 | H  | 0.83186800  | -0.08734300 | 4.09494500  |
| H     | -1.39484200 | 5.07501700  | -1.07126900 | H  | 0.15296400  | 1.50452300  | 4.42574000  |
| C     | -0.54869400 | 0.51058800  | -1.34718800 | H  | -0.51209800 | 0.07076700  | 5.26358900  |
| O     | 0.21939800  | -0.34105600 | -1.76776100 | Co | -2.40950700 | 0.13887100  | 1.13809200  |
| N     | -1.90829200 | 0.18672000  | -1.10921300 | C  | -4.44330300 | 1.95375500  | 0.09042400  |
| C     | 3.53048300  | 1.36599100  | -1.11672800 | O  | -3.91180700 | 1.35821500  | 1.10860200  |
| C     | 4.64995500  | 0.51791400  | -0.89120400 | O  | -4.06980800 | 1.82201000  | -1.09354500 |
| C     | 5.91842900  | 0.80991900  | -1.40572400 | H  | -2.64045900 | 0.93260000  | -1.18930600 |
| C     | 4.45106200  | -0.71741100 | -0.04090500 | C  | -5.59921900 | 2.87262800  | 0.42298900  |
| C     | 7.04129700  | 0.08828900  | -1.03545800 | H  | -6.04953100 | 3.27534500  | -0.48494100 |
| H     | 6.02743900  | 1.65799400  | -2.07825100 | H  | -6.34920300 | 2.33133900  | 1.00712800  |
| C     | 5.73201300  | -1.32881200 | 0.45701200  | H  | -5.23558000 | 3.69505300  | 1.04820300  |
| H     | 3.95787500  | -1.46968200 | -0.68994700 | O  | 8.14598200  | -1.49794600 | 0.28912800  |
| C     | 6.93633900  | -0.96079500 | -0.05461100 | C  | 8.14283000  | -2.53293400 | 1.25849500  |
| H     | 8.02578500  | 0.32936100  | -1.42092400 | H  | 7.56211100  | -3.40118500 | 0.92015200  |

|       |             |             |             |        |             |             |             |
|-------|-------------|-------------|-------------|--------|-------------|-------------|-------------|
| H     | 9.18487300  | -2.82860800 | 1.39527400  | C      | -2.30305600 | -1.18174000 | -0.53205500 |
| H     | 7.73682900  | -2.18571800 | 2.21768000  | C      | -3.42653700 | 0.41028200  | 1.07068300  |
|       |             |             |             | C      | -2.10101000 | -0.04594600 | 0.45004000  |
| 11s_T |             |             |             | H      | -3.26247800 | 1.30290200  | 1.68563200  |
| C     | -0.67689800 | -4.57550700 | -0.71355200 | H      | -3.83479500 | -0.36851200 | 1.72642700  |
| C     | -1.60163300 | -3.54248800 | -0.59626400 | H      | -1.64021900 | 0.80300700  | -0.06741100 |
| C     | -1.24051000 | -2.19065800 | -0.74732000 | H      | -1.38900400 | -0.35396100 | 1.22000300  |
| C     | 0.12287900  | -1.90483800 | -1.03320700 | H      | -3.67398400 | -2.20974700 | -1.78885200 |
| C     | 1.04781900  | -2.95552800 | -1.13852000 | C      | 1.07175300  | -0.26315800 | 3.19437200  |
| C     | 0.65919900  | -4.28211800 | -0.98038700 | O      | 2.19421400  | 0.27822900  | 3.35579200  |
| H     | -0.99895400 | -5.60442800 | -0.58192200 | O      | 0.72122900  | -0.68181700 | 2.02062100  |
| H     | -2.63115800 | -3.77294500 | -0.34427900 | C      | 0.09700600  | -0.44376200 | 4.32685500  |
| H     | 2.08592400  | -2.75096800 | -1.37090900 | H      | -0.83186800 | 0.08734300  | 4.09494500  |
| H     | 1.39484200  | -5.07501700 | -1.07126900 | H      | -0.15296400 | -1.50452300 | 4.42574000  |
| C     | 0.54869400  | -0.51058800 | -1.34718800 | H      | 0.51209800  | -0.07076700 | 5.26358900  |
| O     | -0.21939800 | 0.34105600  | -1.76776100 | Co     | 2.40950700  | -0.13887100 | 1.13809200  |
| N     | 1.90829200  | -0.18672000 | -1.10921300 | C      | 4.44330300  | -1.95375500 | 0.09042400  |
| C     | -3.53048300 | -1.36599100 | -1.11672800 | O      | 3.91180700  | -1.35821500 | 1.10860200  |
| C     | -4.64995500 | -0.51791400 | -0.89120400 | O      | 4.06980800  | -1.82201000 | -1.09354500 |
| C     | -5.91842900 | -0.80991900 | -1.40572400 | H      | 2.64045900  | -0.93260000 | -1.18930600 |
| C     | -4.45106200 | 0.71741100  | -0.04090500 | C      | 5.59921900  | -2.87262800 | 0.42298900  |
| C     | -7.04129700 | -0.08828900 | -1.03545800 | H      | 6.04953100  | -3.27534500 | -0.48494100 |
| H     | -6.02743900 | -1.65799400 | -2.07825100 | H      | 6.34920300  | -2.33133900 | 1.00712800  |
| C     | -5.73201300 | 1.32881200  | 0.45701200  | H      | 5.23558000  | -3.69505300 | 1.04820300  |
| H     | -3.95787500 | 1.46968200  | -0.68994700 | O      | -8.14598200 | 1.49794600  | 0.28912800  |
| C     | -6.93633900 | 0.96079500  | -0.05461100 | C      | -8.14283000 | 2.53293400  | 1.25849500  |
| H     | -8.02578500 | -0.32936100 | -1.42092400 | H      | -7.56211100 | 3.40118500  | 0.92015200  |
| H     | -5.64354100 | 2.12236500  | 1.19023500  | H      | -9.18487300 | 2.82860800  | 1.39527400  |
| C     | 2.37447600  | 1.05842300  | -1.65155800 | H      | -7.73682900 | 2.18571800  | 2.21768000  |
| C     | 2.87196200  | 2.03670800  | -0.75253200 |        |             |             |             |
| C     | 2.35895500  | 1.32911500  | -3.00289700 | 11s_T' |             |             |             |
| C     | 3.33957500  | 3.28980700  | -1.24817400 | C      | 0.66423200  | 4.49988600  | -0.34033900 |
| C     | 2.82818200  | 2.56625500  | -3.49977500 | C      | 1.61633000  | 3.48727600  | -0.27283200 |
| H     | 1.97169800  | 0.58270100  | -3.68739400 | C      | 1.29481100  | 2.13676600  | -0.50390300 |
| C     | 3.33811700  | 2.66110300  | 1.44932100  | C      | -0.05678200 | 1.82961600  | -0.82272300 |
| C     | 3.81313500  | 4.23165100  | -0.30177000 | C      | -1.00903800 | 2.86197200  | -0.88561700 |
| C     | 3.30740600  | 3.53226700  | -2.64392900 | C      | -0.65934700 | 4.18666200  | -0.64537200 |
| H     | 2.80350000  | 2.74913300  | -4.56894700 | H      | 0.95581200  | 5.52782200  | -0.14577100 |
| C     | 3.80839300  | 3.92415700  | 1.04065200  | H      | 2.63854800  | 3.72998100  | -0.00284100 |
| H     | 3.31772500  | 2.36876600  | 2.49427500  | H      | -2.03125000 | 2.64656000  | -1.17186400 |
| H     | 4.17548800  | 5.19415000  | -0.65104500 | H      | -1.41489600 | 4.96333400  | -0.70618900 |
| H     | 3.66451400  | 4.48558900  | -3.02093700 | C      | -0.44904000 | 0.43884800  | -1.19065400 |
| H     | 4.16244400  | 4.62783400  | 1.78492500  | O      | 0.34213200  | -0.40286000 | -1.57100400 |
| N     | 2.89351300  | 1.75560800  | 0.58755600  | N      | -1.84341200 | 0.11657700  | -1.03290300 |

|    |             |             |             |        |             |             |             |
|----|-------------|-------------|-------------|--------|-------------|-------------|-------------|
| C  | 3.58753400  | 1.38030400  | -0.97033200 | O      | -4.06717600 | 1.35469500  | 0.51665800  |
| C  | 4.73117700  | 0.54721800  | -0.81747600 | O      | -3.89310500 | 1.62164000  | -1.71691200 |
| C  | 5.97217400  | 0.87840500  | -1.37182500 | H      | -2.54641400 | 0.81988100  | -1.42330600 |
| C  | 4.58445400  | -0.71883700 | -0.00335200 | C      | -5.88047200 | 2.37560600  | -0.60744100 |
| C  | 7.11943900  | 0.16001500  | -1.07618600 | H      | -6.17715200 | 2.68653500  | -1.60971600 |
| H  | 6.04122800  | 1.75226400  | -2.01601000 | H      | -6.61048900 | 1.66389400  | -0.20933700 |
| C  | 5.89265600  | -1.33395000 | 0.41126200  | H      | -5.87329300 | 3.24037200  | 0.06330600  |
| H  | 4.06618300  | -1.45297300 | -0.65330800 | O      | 8.29877700  | -1.46390000 | 0.13267800  |
| C  | 7.06949700  | -0.92907300 | -0.13584200 | C      | 8.34968800  | -2.53981900 | 1.05528400  |
| H  | 8.08345300  | 0.43030900  | -1.49270700 | H      | 7.76442700  | -3.40006700 | 0.70465200  |
| H  | 5.84537200  | -2.15822400 | 1.11367700  | H      | 9.39996700  | -2.82732700 | 1.13374000  |
| C  | -2.24337800 | -1.20422200 | -1.45497100 | H      | 7.98228000  | -2.23962600 | 2.04538700  |
| C  | -2.93861400 | -2.00692100 | -0.51242100 |        |             |             |             |
| C  | -2.01922700 | -1.68553500 | -2.72589600 |        |             |             |             |
| C  | -3.39192700 | -3.30761400 | -0.88188600 | 10_OSS |             |             |             |
| C  | -2.46410100 | -2.97673900 | -3.09286200 | C      | -0.47413000 | 2.93427800  | 3.64193200  |
| H  | -1.49190500 | -1.07102700 | -3.44572500 | C      | 0.46259600  | 2.09301900  | 3.04630400  |
| C  | -3.81573900 | -2.21864400 | 1.62470700  | C      | 0.10616000  | 1.20245700  | 2.02153200  |
| C  | -4.08687000 | -4.05666100 | 0.10111500  | C      | -1.24701500 | 1.18827200  | 1.60793900  |
| C  | -3.13446700 | -3.77637800 | -2.19430500 | C      | -2.18819900 | 2.02495600  | 2.22138500  |
| H  | -2.27115000 | -3.33261300 | -4.09965400 | C      | -1.80851600 | 2.89790800  | 3.23715000  |
| C  | -4.29849100 | -3.51734600 | 1.34903500  | H      | -0.16185000 | 3.61030000  | 4.43218800  |
| H  | -3.96849600 | -1.75977800 | 2.59738400  | H      | 1.48928900  | 2.09766800  | 3.39632900  |
| H  | -4.44645500 | -5.05128800 | -0.14632000 | H      | -3.21278100 | 2.02853700  | 1.86240400  |
| H  | -3.47671400 | -4.76719900 | -2.47732600 | H      | -2.54366400 | 3.55057800  | 3.69659200  |
| H  | -4.82765700 | -4.06511800 | 2.12064900  | C      | -1.66975400 | 0.40332000  | 0.42131000  |
| N  | -3.16438100 | -1.49509700 | 0.73294700  | O      | -0.98169700 | 0.31477100  | -0.62128500 |
| C  | 2.39032900  | 1.15194600  | -0.34237500 | N      | -2.86936800 | -0.20774100 | 0.51095100  |
| C  | 3.61347300  | -0.45915700 | 1.16712100  | C      | 2.40272500  | 0.72915700  | 1.22228400  |
| C  | 2.25268800  | -0.00189600 | 0.62901300  | C      | 3.47000200  | -0.12592500 | 0.83753600  |
| H  | 3.49000800  | -1.37132300 | 1.76188700  | C      | 4.77317800  | 0.35542700  | 0.66539300  |
| H  | 4.04653300  | 0.30462400  | 1.82467500  | C      | 3.17202700  | -1.58808300 | 0.60342300  |
| H  | 1.76245300  | -0.84432700 | 0.12999100  | C      | 5.84007200  | -0.49993300 | 0.44964300  |
| H  | 1.58268900  | 0.28120500  | 1.44481600  | H      | 4.95045200  | 1.42526200  | 0.74194300  |
| H  | 3.68363700  | 2.24424800  | -1.62520700 | C      | 4.39412800  | -2.46119000 | 0.57002600  |
| C  | -1.24580500 | 0.34777300  | 2.96005400  | H      | 2.70313000  | -1.64310300 | -0.39741600 |
| O  | -2.40211200 | 0.88332700  | 2.89759500  | C      | 5.63952200  | -1.92604100 | 0.45077100  |
| O  | -0.76294000 | -0.12212100 | 1.87496500  | H      | 6.85153000  | -0.12772100 | 0.33073300  |
| C  | -0.46572600 | 0.30099300  | 4.23893800  | H      | 4.23249700  | -3.53293600 | 0.56034700  |
| H  | 0.15775300  | -0.59494500 | 4.27068900  | C      | -3.57612800 | -0.93046800 | -0.45961700 |
| H  | 0.19395700  | 1.17547400  | 4.27908000  | C      | -4.81177500 | -1.48546000 | 0.01110900  |
| H  | -1.13600600 | 0.33484900  | 5.09964600  | C      | -3.18599000 | -1.12567900 | -1.77221500 |
| Co | -2.41936700 | 0.45563400  | 0.93692500  | C      | -5.62733600 | -2.23717400 | -0.88382800 |
| C  | -4.50772100 | 1.73546700  | -0.62682300 | C      | -4.01168900 | -1.87335100 | -2.64478400 |

|      |             |             |             |   |             |             |             |
|------|-------------|-------------|-------------|---|-------------|-------------|-------------|
| H    | -2.25592300 | -0.70813800 | -2.12843400 | C | 0.01612100  | 1.31683600  | 2.00585200  |
| C    | -6.28652400 | -1.76732900 | 1.75545000  | C | -1.32312900 | 1.28295200  | 1.55190600  |
| C    | -6.83659300 | -2.76113900 | -0.36167200 | C | -2.27249100 | 2.17283100  | 2.07072900  |
| C    | -5.20192800 | -2.42128600 | -2.22458500 | C | -1.91304400 | 3.11569000  | 3.02999500  |
| H    | -3.68362400 | -2.01014800 | -3.67031900 | H | -0.29522600 | 3.90257100  | 4.21749400  |
| C    | -7.16802900 | -2.52909300 | 0.95352300  | H | 1.37143600  | 2.30230100  | 3.34447800  |
| H    | -6.53095200 | -1.57181000 | 2.79758700  | H | -3.28583200 | 2.16015900  | 1.68051100  |
| H    | -7.48746900 | -3.34086200 | -1.01010700 | H | -2.65383600 | 3.80847100  | 3.41583900  |
| H    | -5.82520900 | -2.99461900 | -2.90408500 | C | -1.71162900 | 0.41660400  | 0.40915700  |
| H    | -8.08615900 | -2.91666400 | 1.38165800  | O | -0.97718300 | 0.25131200  | -0.58938300 |
| N    | -5.15163000 | -1.26179000 | 1.30966200  | N | -2.92178400 | -0.17376800 | 0.49858700  |
| C    | 1.12445000  | 0.28282700  | 1.47047300  | C | 2.30015600  | 0.79249100  | 1.20973900  |
| C    | 2.07549600  | -2.05678500 | 1.58031400  | C | 3.37536600  | -0.08503000 | 0.88380400  |
| C    | 0.81439100  | -1.20373000 | 1.38589800  | C | 4.66806500  | 0.39094100  | 0.65028600  |
| H    | 1.84032900  | -3.11174500 | 1.40247400  | C | 3.08646000  | -1.56343800 | 0.78483300  |
| H    | 2.44205600  | -1.96890100 | 2.61007500  | C | 5.74146000  | -0.47133500 | 0.49006700  |
| H    | 0.37604100  | -1.44373200 | 0.41066900  | H | 4.83603500  | 1.46460300  | 0.63078200  |
| H    | 0.06133300  | -1.45959900 | 2.13947600  | C | 4.31570100  | -2.42653100 | 0.79449500  |
| H    | 2.62044400  | 1.78907900  | 1.32665600  | H | 2.59524800  | -1.70374500 | -0.19714700 |
| C    | -0.54388000 | 3.31798800  | -1.65326100 | C | 5.55450500  | -1.89302200 | 0.60984900  |
| O    | -0.50795800 | 2.52192600  | -2.62200000 | H | 6.74673300  | -0.10115900 | 0.32284500  |
| O    | 0.00572700  | 2.99983500  | -0.53109200 | H | 4.16398600  | -3.49680600 | 0.87402200  |
| C    | -1.21470000 | 4.66702300  | -1.74793500 | C | -3.59742000 | -0.96845200 | -0.43732600 |
| H    | -1.91686800 | 4.79111100  | -0.91800200 | C | -4.87419600 | -1.44193700 | 0.01214200  |
| H    | -0.45924000 | 5.45464500  | -1.65746300 | C | -3.13940700 | -1.30656900 | -1.69775300 |
| H    | -1.73745100 | 4.77483600  | -2.69929300 | C | -5.66084100 | -2.25912900 | -0.85061500 |
| Co   | 0.67033500  | 1.26891300  | -1.11726400 | C | -3.93707000 | -2.11724300 | -2.53961200 |
| C    | 2.61802300  | 0.53054000  | -2.18901000 | H | -2.17642500 | -0.95386400 | -2.03599000 |
| O    | 2.49396600  | 1.74194900  | -1.82733700 | C | -6.45172700 | -1.51155700 | 1.68647200  |
| O    | 1.63606000  | -0.25791000 | -1.94168700 | C | -6.91300900 | -2.69782100 | -0.35131100 |
| C    | 3.85365900  | 0.02110600  | -2.86835300 | C | -5.16634400 | -2.58819100 | -2.13900600 |
| H    | 4.28481700  | -0.79434300 | -2.28023500 | H | -3.55535000 | -2.36643800 | -3.52462100 |
| H    | 3.58892400  | -0.38099700 | -3.85142800 | C | -7.31016800 | -2.32709700 | 0.91286500  |
| H    | 4.58890600  | 0.81833000  | -2.98145600 | H | -6.74770900 | -1.20747000 | 2.68846000  |
| H    | -3.35071800 | -0.19949100 | 1.40793800  | H | -7.54412100 | -3.32295200 | -0.97668500 |
| O    | 6.80265000  | -2.63257900 | 0.33862500  | H | -5.76804200 | -3.21066200 | -2.79426900 |
| C    | 6.70379100  | -4.04830000 | 0.33148600  | H | -8.26234300 | -2.64676700 | 1.32228900  |
| H    | 6.09748500  | -4.40516500 | -0.51126400 | N | -5.27880000 | -1.08144700 | 1.26042600  |
| H    | 7.72269200  | -4.42582800 | 0.22765000  | C | 1.04332300  | 0.35465000  | 1.55231700  |
| H    | 6.27172000  | -4.42628400 | 1.26711500  | C | 2.02210500  | -1.95861400 | 1.82849800  |
|      |             |             |             | C | 0.74656700  | -1.13378900 | 1.60798100  |
| 10_Q |             |             |             | H | 1.79269100  | -3.02631800 | 1.74372900  |
| C    | -0.59131000 | 3.17044100  | 3.47232900  | H | 2.41786000  | -1.78578200 | 2.83647000  |
| C    | 0.35344500  | 2.27845500  | 2.97007000  | H | 0.27357300  | -1.45778700 | 0.67315700  |

|    |             |             |             |   |             |             |             |
|----|-------------|-------------|-------------|---|-------------|-------------|-------------|
| H  | 0.02337700  | -1.32888100 | 2.40769600  | C | 5.78323300  | -0.55946600 | 0.50856500  |
| H  | 2.50579600  | 1.86077600  | 1.21419600  | H | 4.89707700  | 1.36820300  | 0.79772700  |
| C  | -0.27074200 | 3.34360800  | -1.74841900 | C | 4.32725000  | -2.51442200 | 0.59548300  |
| O  | -0.20604000 | 2.45645800  | -2.65260400 | H | 2.65142500  | -1.67988400 | -0.38488300 |
| O  | 0.19065200  | 3.09289500  | -0.58359700 | C | 5.57688300  | -1.98397100 | 0.49656700  |
| C  | -0.88310900 | 4.69284600  | -2.02601200 | H | 6.79736800  | -0.19026800 | 0.40442300  |
| H  | -1.65921800 | 4.90287000  | -1.28389500 | H | 4.16111200  | -3.58533100 | 0.57510300  |
| H  | -0.11422800 | 5.46540600  | -1.92223100 | C | -3.62388300 | -0.92053100 | -0.49202400 |
| H  | -1.30617400 | 4.73385100  | -3.03050300 | C | -4.88050400 | -1.45117400 | -0.04977300 |
| Co | 0.75633400  | 1.20256200  | -1.23466600 | C | -3.20570700 | -1.12803500 | -1.79384700 |
| C  | 2.74244200  | 0.22262200  | -2.26471400 | C | -5.68915300 | -2.18841500 | -0.96274000 |
| O  | 2.73081200  | 1.47065500  | -2.06359200 | C | -4.02442700 | -1.86155700 | -2.68488200 |
| O  | 1.71392200  | -0.47422900 | -1.93854900 | H | -2.25777800 | -0.73241000 | -2.12710400 |
| C  | 3.93676000  | -0.46950200 | -2.86513300 | C | -6.39977400 | -1.70345500 | 1.66045300  |
| H  | 4.30373300  | -1.23004400 | -2.16964100 | C | -6.92028000 | -2.68798000 | -0.46848400 |
| H  | 3.63804800  | -0.98074200 | -3.78578800 | C | -5.23564000 | -2.38366600 | -2.29270300 |
| H  | 4.73389400  | 0.24248300  | -3.08042700 | H | -3.67399300 | -2.00847400 | -3.70156900 |
| H  | -3.44751300 | -0.07372500 | 1.36480300  | C | -7.27745700 | -2.44814300 | 0.83852000  |
| O  | 6.72133300  | -2.59849000 | 0.53314900  | H | -6.66396100 | -1.50298000 | 2.69679100  |
| C  | 6.63318600  | -4.01129600 | 0.63240700  | H | -7.56722100 | -3.25560800 | -1.13136100 |
| H  | 6.01424300  | -4.43306700 | -0.17026900 | H | -5.85395700 | -2.94562500 | -2.98607900 |
| H  | 7.65286900  | -4.38906900 | 0.53746100  | H | -8.21278300 | -2.81709700 | 1.24531500  |
| H  | 6.22144700  | -4.32216800 | 1.60136200  | N | -5.24545800 | -1.22019300 | 1.24063400  |

10\_T

|   |             |             |             |    |             |             |             |
|---|-------------|-------------|-------------|----|-------------|-------------|-------------|
| C | -0.53105000 | 2.85617900  | 3.70498700  | C  | 1.06279100  | 0.23574900  | 1.49445300  |
| C | 0.40335400  | 2.02100900  | 3.09726200  | C  | 2.00035100  | -2.10876400 | 1.58355500  |
| C | 0.04631700  | 1.15355300  | 2.05304400  | C  | 0.74550400  | -1.24707200 | 1.38654500  |
| C | -1.30492200 | 1.15566300  | 1.63244600  | H  | 1.76150700  | -3.16053300 | 1.39243400  |
| C | -2.24356100 | 1.98657300  | 2.25749100  | H  | 2.35661500  | -2.03375300 | 2.61796300  |
| C | -1.86329500 | 2.83651600  | 3.29255400  | H  | 0.31646200  | -1.47039500 | 0.40296800  |
| H | -0.21863800 | 3.51440200  | 4.51005100  | H  | -0.01748800 | -1.50892100 | 2.12788900  |
| H | 1.42837300  | 2.01173500  | 3.45210100  | H  | 2.56388400  | 1.73854900  | 1.36605300  |
| H | -3.26674900 | 2.00384000  | 1.89480300  | C  | -0.29562200 | 3.49517200  | -1.56662600 |
| H | -2.59669200 | 3.48467300  | 3.76108300  | O  | -0.20359700 | 2.66293500  | -2.51906500 |
| C | -1.72315800 | 0.39736600  | 0.42506200  | O  | 0.12269300  | 3.17326600  | -0.40277100 |
| O | -1.02035900 | 0.33793900  | -0.60754000 | C  | -0.87018600 | 4.87020900  | -1.79478900 |
| N | -2.92493500 | -0.21204900 | 0.49471800  | H  | -1.51372500 | 5.15310600  | -0.95786700 |
| C | 2.34095400  | 0.68066600  | 1.24670000  | H  | -0.04830200 | 5.59341800  | -1.84078800 |
| C | 3.41053500  | -0.17739500 | 0.86663500  | H  | -1.42680600 | 4.91022700  | -2.73237800 |
| C | 4.71639000  | 0.29960500  | 0.71452300  | Co | 0.72067100  | 1.32886100  | -1.14598900 |
| C | 3.10887900  | -1.63643900 | 0.62177200  | C  | 2.73628600  | 0.45079500  | -2.21274100 |
|   |             |             |             | O  | 2.70764400  | 1.67606200  | -1.90090700 |
|   |             |             |             | O  | 1.71270700  | -0.28335900 | -1.96557300 |
|   |             |             |             | C  | 3.94696800  | -0.16968900 | -2.85793100 |
|   |             |             |             | H  | 4.31889900  | -0.98442100 | -2.22963700 |

|   |             |             |             |   |             |             |             |
|---|-------------|-------------|-------------|---|-------------|-------------|-------------|
| H | 3.66514500  | -0.60051900 | -3.82391300 | C | -7.18973800 | -2.40259700 | 1.01935400  |
| H | 4.73592300  | 0.56931200  | -3.00009000 | H | -6.62756200 | -1.24738100 | 2.77204700  |
| H | -3.42167400 | -0.20481800 | 1.38340700  | H | -7.42914300 | -3.42584600 | -0.85488200 |
| O | 6.73786400  | -2.69536800 | 0.39393900  | H | -5.68539500 | -3.29238600 | -2.70178800 |
| C | 6.63193900  | -4.11033800 | 0.36899700  | H | -8.12754700 | -2.73986800 | 1.44743100  |
| H | 6.03522000  | -4.45405500 | -0.48596300 | N | -5.18388100 | -1.10450100 | 1.32004600  |
| H | 7.65022500  | -4.49192000 | 0.27437200  | C | 1.08571500  | 0.41918500  | 1.57500200  |
| H | 6.18549200  | -4.49707400 | 1.29427800  | C | 2.08097200  | -1.88108200 | 1.89732100  |

10\_T

|   |             |             |             |
|---|-------------|-------------|-------------|
| C | -0.56725400 | 3.29170200  | 3.39456500  |
| C | 0.38211600  | 2.38216900  | 2.93352400  |
| C | 0.05536000  | 1.39377300  | 1.99336700  |
| C | -1.27606000 | 1.35051000  | 1.51944100  |
| C | -2.23067200 | 2.25765300  | 1.99755100  |
| C | -1.88239600 | 3.22734000  | 2.93387700  |
| H | -0.28032900 | 4.04505000  | 4.12199600  |
| H | 1.39533800  | 2.41464600  | 3.32035500  |
| H | -3.23851500 | 2.23428200  | 1.59390300  |
| H | -2.62682200 | 3.93276500  | 3.28858500  |
| C | -1.65454000 | 0.44456800  | 0.40554500  |
| O | -0.92328300 | 0.23677100  | -0.58889400 |
| N | -2.86270500 | -0.14794500 | 0.50959000  |
| C | 2.33085200  | 0.85224800  | 1.19413500  |
| C | 3.40183000  | -0.03108000 | 0.86540100  |
| C | 4.68492400  | 0.44146700  | 0.58245800  |
| C | 3.11438400  | -1.51250400 | 0.81345400  |
| C | 5.75662500  | -0.42249200 | 0.41079200  |
| H | 4.84906400  | 1.51484600  | 0.53277800  |
| C | 4.34647100  | -2.37205300 | 0.81026900  |
| H | 2.59515000  | -1.68236300 | -0.14910600 |
| C | 5.57754400  | -1.84055500 | 0.57358300  |
| H | 6.75546500  | -0.05431700 | 0.20498300  |
| H | 4.20086400  | -3.44015600 | 0.92340900  |
| C | -3.53177300 | -0.97237400 | -0.40507200 |
| C | -4.78961000 | -1.47086900 | 0.07014000  |
| C | -3.08674200 | -1.31203200 | -1.66997200 |
| C | -5.57004500 | -2.31655500 | -0.77065700 |
| C | -3.87838000 | -2.15096000 | -2.48949500 |
| H | -2.13996700 | -0.93722600 | -2.02958600 |
| C | -6.33952600 | -1.55708200 | 1.76944500  |
| C | -6.80336600 | -2.77888700 | -0.24654700 |
| C | -5.08854500 | -2.64820300 | -2.06325300 |
| H | -3.50742000 | -2.40034400 | -3.47857100 |

|    |             |             |             |
|----|-------------|-------------|-------------|
| H  | -6.62756200 | -1.24738100 | 2.77204700  |
| H  | -7.42914300 | -3.42584600 | -0.85488200 |
| H  | -5.68539500 | -3.29238600 | -2.70178800 |
| H  | -8.12754700 | -2.73986800 | 1.44743100  |
| N  | -5.18388100 | -1.10450100 | 1.32004600  |
| C  | 1.08571500  | 0.41918500  | 1.57500200  |
| C  | 2.08097200  | -1.88108200 | 1.89732100  |
| C  | 0.79646000  | -1.06697700 | 1.68903100  |
| H  | 1.85411700  | -2.95166900 | 1.85016900  |
| H  | 2.50427300  | -1.67733100 | 2.88815300  |
| H  | 0.29585200  | -1.42311700 | 0.78035600  |
| H  | 0.09882500  | -1.23772600 | 2.51665800  |
| H  | 2.52983000  | 1.92063800  | 1.15619700  |
| C  | -0.49140300 | 3.14404800  | -1.87427100 |
| O  | -0.50393600 | 2.26576000  | -2.77007600 |
| O  | 0.10882600  | 2.92019800  | -0.75566500 |
| C  | -1.16228700 | 4.48414500  | -2.05438400 |
| H  | -1.82283500 | 4.68386200  | -1.20523400 |
| H  | -0.40151100 | 5.27170500  | -2.06917800 |
| H  | -1.73021300 | 4.51239700  | -2.98531700 |
| Co | 0.72665800  | 1.13355600  | -1.21337000 |
| C  | 2.63656300  | 0.25777700  | -2.24546200 |
| O  | 2.53619900  | 1.50297400  | -2.01392200 |
| O  | 1.64608100  | -0.48251400 | -1.90168000 |
| C  | 3.85200000  | -0.34230100 | -2.88514400 |
| H  | 4.25050400  | -1.13202500 | -2.24199800 |
| H  | 3.57131700  | -0.79903300 | -3.83980600 |
| H  | 4.61628400  | 0.41728700  | -3.05153700 |
| H  | -3.38454000 | -0.03626600 | 1.37658800  |
| O  | 6.74381600  | -2.54525500 | 0.48035600  |
| C  | 6.66414700  | -3.95473500 | 0.62415400  |
| H  | 6.02309200  | -4.40232500 | -0.14657000 |
| H  | 7.68199500  | -4.33209700 | 0.50981000  |
| H  | 6.28277700  | -4.23785300 | 1.61380200  |

TS6\_OSS

|   |             |            |             |
|---|-------------|------------|-------------|
| C | 0.48266000  | 4.35807600 | -1.82590800 |
| C | -0.41197700 | 3.32118900 | -1.57742300 |
| C | 0.00669300  | 2.09460100 | -1.03437900 |
| C | 1.38726100  | 1.95075000 | -0.74755700 |
| C | 2.28613200  | 2.99507300 | -1.01156400 |
| C | 1.84157400  | 4.19866700 | -1.54867600 |
| H | 0.11910900  | 5.28977000 | -2.24970600 |

|   |             |             |             |       |             |             |             |
|---|-------------|-------------|-------------|-------|-------------|-------------|-------------|
| H | -1.45852300 | 3.44101700  | -1.83536100 | H     | -1.51917400 | 4.20095100  | 3.68192700  |
| H | 3.33302500  | 2.88446200  | -0.74492300 | H     | -3.05837800 | 3.82518300  | 2.87892200  |
| H | 2.54394900  | 5.00435200  | -1.73562700 | H     | -2.65103900 | 3.00231700  | 4.38968200  |
| C | 1.87798800  | 0.74703200  | -0.03814200 | Co    | -0.68217100 | 0.54784000  | 1.31443600  |
| O | 1.20392900  | 0.15280900  | 0.83843000  | C     | -1.77647400 | -2.31015300 | 1.55882300  |
| N | 3.11809400  | 0.32000500  | -0.35650900 | O     | -0.89502500 | -1.41080500 | 1.56877400  |
| C | -2.31259900 | 1.32244400  | -0.54917400 | O     | -2.72269700 | -2.43501700 | 0.71567000  |
| C | -3.38748100 | 0.43082000  | -0.72450000 | C     | -1.71413100 | -3.35185700 | 2.65632400  |
| C | -4.70088800 | 0.74108700  | -0.27442700 | H     | -2.30041600 | -4.23529000 | 2.40024900  |
| C | -3.16412100 | -0.86095900 | -1.35542800 | H     | -0.67519500 | -3.62546500 | 2.85546200  |
| C | -5.76040800 | -0.08357500 | -0.55046900 | H     | -2.12221400 | -2.90879500 | 3.57184900  |
| H | -4.86186600 | 1.66448600  | 0.27569300  | H     | 3.61126200  | 0.78301100  | -1.11710600 |
| C | -4.33227500 | -1.61955700 | -1.76561700 | H     | -2.85601300 | -1.59803600 | -0.26278800 |
| C | -5.58327800 | -1.27474700 | -1.32213900 | O     | -6.73597200 | -1.97118800 | -1.55598700 |
| H | -6.76293200 | 0.15530600  | -0.20977700 | C     | -6.62485800 | -3.17141700 | -2.30363400 |
| H | -4.16842800 | -2.52167100 | -2.34446100 | H     | -7.63319900 | -3.58402900 | -2.37255900 |
| C | 3.87073100  | -0.72582400 | 0.19228600  | H     | -6.24329600 | -2.98302900 | -3.31606200 |
| C | 5.17040900  | -0.87906100 | -0.39514700 | H     | -5.96997600 | -3.89784000 | -1.80483300 |
| C | 3.46664800  | -1.57736900 | 1.20489800  |       |             |             |             |
| C | 6.03568100  | -1.90851900 | 0.07642100  | TS6_Q |             |             |             |
| C | 4.34162200  | -2.59244200 | 1.65888000  | C     | 0.49084300  | 4.40197600  | -2.03440000 |
| H | 2.48521500  | -1.46772800 | 1.64178000  | C     | -0.44229300 | 3.40358000  | -1.79356200 |
| C | 6.71134300  | -0.15009800 | -1.94164500 | C     | -0.06084600 | 2.14036000  | -1.30002100 |
| C | 7.30694500  | -2.01029900 | -0.54266100 | C     | 1.31230500  | 1.94230500  | -0.98372600 |
| C | 5.59550900  | -2.76436900 | 1.11871000  | C     | 2.25082200  | 2.95717700  | -1.24958000 |
| H | 4.00072600  | -3.24654100 | 2.45530000  | C     | 1.85125600  | 4.17581700  | -1.78014000 |
| C | 7.64681700  | -1.13553900 | -1.54892000 | H     | 0.16552200  | 5.35666800  | -2.43751300 |
| H | 6.96060600  | 0.55043300  | -2.73599700 | H     | -1.48771800 | 3.56877100  | -2.03393800 |
| H | 7.99758800  | -2.78111900 | -0.21255300 | H     | 3.29179800  | 2.81301600  | -0.97486400 |
| H | 6.25702500  | -3.54767900 | 1.47616000  | H     | 2.58385300  | 4.95398800  | -1.96800100 |
| H | 8.61151700  | -1.18860700 | -2.04182300 | C     | 1.73424300  | 0.77769600  | -0.18229500 |
| N | 5.51875600  | -0.01997000 | -1.39126400 | O     | 1.01740800  | 0.24456300  | 0.71126800  |
| C | -0.97219700 | 0.99554100  | -0.83766300 | N     | 2.98108600  | 0.30434200  | -0.40968500 |
| C | -1.91948700 | -0.91277100 | -2.24098800 | C     | -2.32098400 | 1.30854300  | -0.62815900 |
| C | -0.68269400 | -0.35254700 | -1.52416000 | C     | -3.36706400 | 0.34183500  | -0.65220000 |
| H | -1.72192900 | -1.94212400 | -2.56090300 | C     | -4.61238200 | 0.57705900  | -0.02033400 |
| H | -2.11178900 | -0.32473200 | -3.15013300 | C     | -3.16112500 | -0.92957600 | -1.33046200 |
| H | -0.33493600 | -1.08982900 | -0.79570000 | C     | -5.65787800 | -0.30788100 | -0.14353700 |
| H | 0.13008600  | -0.22141300 | -2.24698500 | H     | -4.74461300 | 1.49230500  | 0.55161100  |
| H | -2.52605700 | 2.29708700  | -0.11953300 | C     | -4.32823200 | -1.75563200 | -1.56791500 |
| C | -1.58217600 | 2.30937700  | 2.66355100  | C     | -5.52151500 | -1.48381300 | -0.94339700 |
| O | -2.10702200 | 1.14372700  | 2.62511600  | H     | -6.61333500 | -0.12344300 | 0.33634800  |
| O | -0.53537900 | 2.52632300  | 1.97946700  | H     | -4.20095400 | -2.64620000 | -2.17330700 |
| C | -2.23243000 | 3.40425100  | 3.46410700  | C     | 3.69019200  | -0.70627400 | 0.24644100  |

|    |             |             |             |       |             |             |             |
|----|-------------|-------------|-------------|-------|-------------|-------------|-------------|
| C  | 4.99139100  | -0.95905900 | -0.30533900 | H     | -5.81798900 | -4.12550300 | -1.41336600 |
| C  | 3.25091500  | -1.44319900 | 1.33359200  |       |             |             |             |
| C  | 5.81612500  | -1.96750100 | 0.27310700  |       |             |             |             |
| C  | 4.08557600  | -2.43848400 | 1.89270200  |       |             |             |             |
| H  | 2.27310700  | -1.25412600 | 1.75001800  | TS6_T |             |             |             |
| C  | 6.57426800  | -0.42919100 | -1.89093300 | C     | 0.45354700  | 4.30772200  | -2.08578100 |
| C  | 7.08979000  | -2.16867600 | -0.31628700 | C     | -0.44552500 | 3.28139500  | -1.80160200 |
| C  | 5.33728200  | -2.70555000 | 1.38593800  | C     | -0.03225300 | 2.09403700  | -1.18234400 |
| H  | 3.71676600  | -2.99917100 | 2.74613000  | C     | 1.33654400  | 1.96780800  | -0.84524200 |
| C  | 7.47074300  | -1.40388300 | -1.39494000 | C     | 2.23803400  | 2.99823900  | -1.14367700 |
| H  | 6.85588600  | 0.18613700  | -2.74299100 | C     | 1.80307100  | 4.16690900  | -1.76370400 |
| H  | 7.75069600  | -2.92714200 | 0.09376900  | H     | 0.09922400  | 5.21513500  | -2.56591000 |
| H  | 5.96753600  | -3.47294800 | 1.82477300  | H     | -1.48934200 | 3.38364100  | -2.07974700 |
| H  | 8.43866200  | -1.53492700 | -1.86665000 | H     | 3.27736100  | 2.90819000  | -0.84166100 |
| N  | 5.38058000  | -0.20954200 | -1.37186600 | H     | 2.50849300  | 4.96343900  | -1.97694300 |
| C  | -1.04618200 | 1.06907200  | -1.16891200 | C     | 1.81295800  | 0.80110500  | -0.05455200 |
| C  | -2.02439300 | -0.93560500 | -2.35289100 | O     | 1.13927300  | 0.27444800  | 0.85928400  |
| C  | -0.75247500 | -0.30684100 | -1.75767300 | N     | 3.04631100  | 0.34276100  | -0.36075600 |
| H  | -1.81123700 | -1.96081900 | -2.67556600 | C     | -2.30330700 | 1.29717700  | -0.47882900 |
| H  | -2.32563800 | -0.37210700 | -3.24750100 | C     | -3.38036000 | 0.37382100  | -0.55396400 |
| H  | -0.34161900 | -0.99396300 | -1.00707000 | C     | -4.63836500 | 0.65529000  | 0.03790300  |
| H  | 0.01820000  | -0.20989700 | -2.52972900 | C     | -3.21415300 | -0.88079700 | -1.27508900 |
| H  | -2.54099600 | 2.29174300  | -0.21884000 | C     | -5.72160600 | -0.15973500 | -0.17559900 |
| C  | -1.30771300 | 2.71086900  | 2.58887500  | H     | -4.74327700 | 1.54958600  | 0.64596200  |
| O  | -1.81201100 | 1.55546700  | 2.83852200  | C     | -4.42390300 | -1.62302500 | -1.60578900 |
| O  | -0.53193600 | 2.84144300  | 1.60425900  | C     | -5.62343500 | -1.30689100 | -1.02310600 |
| C  | -1.67019100 | 3.87336500  | 3.47504800  | H     | -6.68555000 | 0.05900200  | 0.27261000  |
| H  | -1.12332900 | 4.77120700  | 3.18501800  | H     | -4.31631600 | -2.49849500 | -2.23588700 |
| H  | -2.74678900 | 4.06017500  | 3.40409500  | C     | 3.78252400  | -0.69082800 | 0.23216300  |
| H  | -1.45231700 | 3.62387000  | 4.51780000  | C     | 5.08002600  | -0.88944500 | -0.34604100 |
| Co | -0.89978800 | 0.67445100  | 1.26749600  | C     | 3.36203100  | -1.49468300 | 1.27675500  |
| C  | -1.41596300 | -2.38277100 | 1.34963100  | C     | 5.92664500  | -1.91435200 | 0.16755500  |
| O  | -1.21315200 | -1.21648600 | 1.77696800  | C     | 4.21832800  | -2.50659400 | 1.77175500  |
| O  | -2.02597200 | -2.68306700 | 0.27016900  | H     | 2.38265000  | -1.34877800 | 1.70778000  |
| C  | -0.87661700 | -3.53385800 | 2.16440500  | C     | 6.63562000  | -0.24860300 | -1.91668500 |
| H  | -1.36938400 | -4.47060200 | 1.90195700  | C     | 7.19724200  | -2.06173600 | -0.44379800 |
| H  | 0.19555400  | -3.62801100 | 1.95576100  | C     | 5.46979000  | -2.72127900 | 1.24131600  |
| H  | -0.99207700 | -3.32316700 | 3.22983500  | H     | 3.86535000  | -3.12245900 | 2.59304400  |
| H  | 3.50697700  | 0.68534800  | -1.19339400 | C     | 7.55378800  | -1.23304700 | -1.48272000 |
| H  | -2.56810900 | -1.76226200 | -0.36984600 | H     | 6.89808300  | 0.41559600  | -2.73758000 |
| O  | -6.65065500 | -2.25131300 | -1.01719600 | H     | 7.87439700  | -2.83038100 | -0.08207300 |
| C  | -6.58108300 | -3.43462600 | -1.79563500 | H     | 6.11716900  | -3.50102900 | 1.63088700  |
| H  | -7.56241200 | -3.90747900 | -1.72282400 | H     | 8.51843300  | -1.32188300 | -1.97056200 |
| H  | -6.36575600 | -3.21345400 | -2.84957800 | N     | 5.44442400  | -0.07664100 | -1.37491500 |



|      |             |             |             |    |             |             |             |
|------|-------------|-------------|-------------|----|-------------|-------------|-------------|
| C    | -1.00863600 | 1.00042800  | -0.95064900 | O  | 1.01816300  | -0.18058100 | 0.31238700  |
| C    | -2.07125000 | -0.86862400 | -2.29689200 | N  | 3.15452400  | 0.20108600  | -0.40204500 |
| C    | -0.77457100 | -0.33458900 | -1.67157400 | C  | -2.12362400 | 1.62337300  | -0.40402100 |
| H    | -1.90624500 | -1.87956300 | -2.68434500 | C  | -3.28389600 | 0.78946300  | -0.70265400 |
| H    | -2.35351500 | -0.23443300 | -3.14844700 | C  | -4.39151900 | 0.72363700  | 0.16147200  |
| H    | -0.37096500 | -1.08935800 | -0.98795200 | C  | -3.27382900 | -0.02459900 | -1.85669000 |
| H    | -0.02058100 | -0.18992600 | -2.45208800 | C  | -5.44490500 | -0.14413100 | -0.08626000 |
| H    | -2.50143600 | 2.28446700  | -0.07135900 | H  | -4.40752100 | 1.34758600  | 1.05132700  |
| C    | -1.34069300 | 2.50911900  | 2.71643200  | C  | -4.33029700 | -0.89874600 | -2.10594500 |
| O    | -1.82428700 | 1.32658000  | 2.83287200  | C  | -5.41238100 | -0.97359000 | -1.21684600 |
| O    | -0.56713700 | 2.78561100  | 1.76165900  | H  | -6.29276400 | -0.21090500 | 0.58710600  |
| C    | -1.72839500 | 3.54892000  | 3.74145000  | H  | -4.29845200 | -1.52060800 | -2.99307700 |
| H    | -1.24439000 | 4.50424700  | 3.53378400  | C  | 3.80017400  | -0.91757800 | 0.08798700  |
| H    | -2.81557600 | 3.67837700  | 3.73931300  | C  | 5.16546800  | -1.05839600 | -0.35819900 |
| H    | -1.44628300 | 3.20194300  | 4.74051200  | C  | 3.27230900  | -1.87442300 | 0.95268600  |
| Co   | -0.88285800 | 0.60806100  | 1.17735400  | C  | 5.94748100  | -2.16693500 | 0.08823800  |
| C    | -1.47450200 | -2.49678900 | 1.28572000  | C  | 4.06503400  | -2.95888600 | 1.37735600  |
| O    | -1.03450200 | -1.36033300 | 1.60055500  | H  | 2.25043100  | -1.77984700 | 1.28734500  |
| O    | -2.28304700 | -2.75017700 | 0.33787800  | C  | 6.90338500  | -0.20981600 | -1.61523700 |
| C    | -0.98080500 | -3.67479800 | 2.10315600  | C  | 7.28063900  | -2.23834000 | -0.38816000 |
| H    | -1.49213900 | -4.59689200 | 1.82464900  | C  | 5.37289700  | -3.12081400 | 0.96633000  |
| H    | 0.09640400  | -3.79194000 | 1.94264000  | H  | 3.62074700  | -3.68596300 | 2.05152700  |
| H    | -1.13233500 | -3.46806400 | 3.16637700  | C  | 7.76103600  | -1.26486600 | -1.23683100 |
| H    | 3.54468000  | 0.76447200  | -1.14162300 | H  | 7.25904400  | 0.57124300  | -2.28442300 |
| H    | -2.74555300 | -1.70564800 | -0.39083800 | H  | 7.91060000  | -3.06638900 | -0.07444300 |
| O    | -6.79286100 | -1.99371300 | -1.17834400 | H  | 5.96958000  | -3.96285000 | 1.30347100  |
| C    | -6.75935600 | -3.15025200 | -2.00067500 | H  | 8.77773500  | -1.29701100 | -1.61445200 |
| H    | -7.77083100 | -3.56037700 | -1.99261900 | N  | 5.65350000  | -0.10671200 | -1.19539000 |
| H    | -6.47896200 | -2.90258000 | -3.03302300 | C  | -0.90797700 | 1.46113300  | -1.04951100 |
| H    | -6.06062700 | -3.90149400 | -1.61036100 | C  | -2.10606800 | 0.11158300  | -2.80767900 |
|      |             |             |             | C  | -0.78374100 | 0.31688100  | -2.05637200 |
|      |             |             |             | H  | -2.03622800 | -0.76692900 | -3.45656900 |
|      |             |             |             | H  | -2.28678700 | 0.97621100  | -3.46313300 |
|      |             |             |             | H  | -0.50360000 | -0.61734000 | -1.55547400 |
|      |             |             |             | H  | 0.02469000  | 0.54297400  | -2.75620000 |
|      |             |             |             | H  | -2.24105000 | 2.43440200  | 0.31053700  |
|      |             |             |             | C  | -1.11084500 | 1.54069100  | 3.11959100  |
|      |             |             |             | O  | -1.56624100 | 0.35124100  | 2.82854900  |
|      |             |             |             | O  | -0.35447700 | 2.10118700  | 2.30728300  |
|      |             |             |             | C  | -1.52910900 | 2.15653300  | 4.42419300  |
|      |             |             |             | H  | -1.08905500 | 3.14668400  | 4.54282300  |
|      |             |             |             | H  | -2.62096800 | 2.22698600  | 4.46183400  |
|      |             |             |             | H  | -1.21598900 | 1.50957600  | 5.24972300  |
|      |             |             |             | Co | -0.72852100 | 0.21346500  | 1.00569900  |
| 11_Q |             |             |             |    |             |             |             |
| C    | 0.94624500  | 4.72714700  | -1.06357800 |    |             |             |             |
| C    | -0.07079200 | 3.78283600  | -1.01724200 |    |             |             |             |
| C    | 0.19512200  | 2.40941800  | -0.88556900 |    |             |             |             |
| C    | 1.55405100  | 1.97701500  | -0.67910000 |    |             |             |             |
| C    | 2.58097900  | 2.96501800  | -0.77279400 |    |             |             |             |
| C    | 2.28625100  | 4.29864600  | -0.96309800 |    |             |             |             |
| H    | 0.71251900  | 5.77737200  | -1.20673400 |    |             |             |             |
| H    | -1.10210600 | 4.09239100  | -1.16099300 |    |             |             |             |
| H    | 3.61621600  | 2.68006200  | -0.61352200 |    |             |             |             |
| H    | 3.09365000  | 5.02401400  | -1.00789200 |    |             |             |             |
| C    | 1.86472400  | 0.64403700  | -0.24483500 |    |             |             |             |

C -2.68475800 -2.07573100 1.19607600  
O -1.69421900 -1.59327000 0.62307300  
O -3.16876600 -1.62472800 2.33074600  
C -3.41445900 -3.26140600 0.64502500  
H -3.29341400 -4.10675400 1.33058500  
H -4.48177700 -3.03815200 0.57718300  
H -3.01969600 -3.52028500 -0.33597600  
H 3.76435400 0.73883100 -1.01152100  
H -2.64205600 -0.83866900 2.65477200  
O -6.46504600 -1.82880400 -1.35738100  
C -6.47840900 -2.69059000 -2.48779300  
H -7.39283300 -3.28068300 -2.40629500  
H -6.49808200 -2.12548000 -3.42792900  
H -5.61372500 -3.36637900 -2.49190000

11\_S

C 0.64102500 3.76843000 -2.84844100  
C -0.29025100 2.84036900 -2.38213100  
C 0.07881700 1.80699900 -1.51313200  
C 1.43346100 1.73335900 -1.10688100  
C 2.36779200 2.66029000 -1.58895500  
C 1.97673200 3.67781900 -2.45730200  
H 0.32324400 4.55966300 -3.52159100  
H -1.32652300 2.90232400 -2.69953600  
H 3.39776900 2.61219900 -1.24716300  
H 2.70614000 4.39927000 -2.81186100  
C 1.87480200 0.73524800 -0.08165100  
O 1.22857300 0.46598200 0.95058400  
N 3.07852900 0.15708500 -0.33625900  
C -2.21244900 1.15926000 -0.57904100  
C -3.34362300 0.22122000 -0.71545300  
C -4.52720000 0.37998700 0.02490000  
C -3.24314200 -0.88524700 -1.58089700  
C -5.57569500 -0.52522000 -0.07399900  
H -4.61405100 1.22649100 0.70130500  
C -4.29219600 -1.80673200 -1.67668600  
C -5.46049100 -1.63328200 -0.92587500  
H -6.48698800 -0.40034400 0.50192100  
H -4.18662900 -2.64956500 -2.35072200  
C 3.80629200 -0.75295500 0.43564100  
C 5.04926600 -1.16585100 -0.15151300  
C 3.42728600 -1.25897700 1.66683400

C 5.88011000 -2.09317800 0.54294300  
C 4.26707000 -2.17728800 2.33967800  
H 2.48961700 -0.95068300 2.10479200  
C 6.51971100 -1.01468100 -1.91635000  
C 7.09445200 -2.46300400 -0.08818100  
C 5.46469800 -2.59259100 1.80404400  
H 3.94499800 -2.55753600 3.30425700  
C 7.41658700 -1.92756500 -1.31404400  
H 6.75556900 -0.57977500 -2.88560700  
H 7.75655000 -3.16766800 0.40726700  
H 6.09969200 -3.29875400 2.33039700  
H 8.33815500 -2.19149000 -1.82171300  
N 5.38018600 -0.64341100 -1.36370700  
C -0.90430300 0.78539200 -1.05418900  
C -2.00477800 -1.02306800 -2.43780900  
C -0.73406300 -0.60905700 -1.68246900  
H -1.91262300 -2.05000600 -2.80895200  
H -2.11675200 -0.37878900 -3.32288000  
H -0.51716300 -1.35811300 -0.91695200  
H 0.11456800 -0.60010100 -2.37403400  
H -2.47180700 2.21540500 -0.53194500  
C -0.92878300 2.75038900 2.39538900  
O -1.25507600 1.62400500 2.90609400  
O -0.61983700 2.80808000 1.16629700  
C -0.87317100 3.97849900 3.25936400  
H -0.75260600 4.87687300 2.65252900  
H -1.78139900 4.04888600 3.86431700  
H -0.02486900 3.89263900 3.94717500  
Co -0.88152900 0.87253200 0.88202700  
C -2.29755500 -1.31370300 1.94213100  
O -1.35735500 -1.01924700 1.18479900  
O -2.81702000 -0.48196700 2.81473700  
C -2.94774400 -2.65795900 1.88854800  
H -3.24468100 -2.99078200 2.88492200  
H -3.85051000 -2.56364400 1.27424600  
H -2.27829600 -3.37867600 1.41939700  
H 3.53835900 0.36525900 -1.21891000  
H -2.31368600 0.38467800 2.81023400  
O -6.53334400 -2.48096600 -0.95399500  
C -6.45956900 -3.61308200 -1.80545800  
H -7.40155000 -4.15043300 -1.67899100  
H -6.35096400 -3.32452100 -2.85904200  
H -5.62935000 -4.27692500 -1.53004000

|      |             |             |             |             |             |             |             |
|------|-------------|-------------|-------------|-------------|-------------|-------------|-------------|
| I1_T |             |             | H           | -1.97743600 | 0.15713400  | -3.48058600 |             |
| C    | 0.82860100  | 4.32845900  | -2.12545500 | H           | -0.38416200 | -1.08160500 | -1.19140500 |
| C    | -0.12017200 | 3.33336200  | -1.89380200 | H           | 0.24868600  | -0.14758800 | -2.54574200 |
| C    | 0.22234600  | 2.12761700  | -1.26733500 | H           | -2.30131200 | 2.38031000  | -0.27451800 |
| C    | 1.56871100  | 1.94954600  | -0.86787000 | C           | -1.53005400 | 2.15260700  | 2.97532500  |
| C    | 2.52137800  | 2.94787700  | -1.11433600 | O           | -1.68344900 | 0.87412600  | 2.77319600  |
| C    | 2.15629300  | 4.13587700  | -1.74280400 | O           | -0.87264300 | 2.85002100  | 2.18721900  |
| H    | 0.53075900  | 5.25296000  | -2.61147600 | C           | -2.18701900 | 2.72593200  | 4.20946700  |
| H    | -1.14699000 | 3.47570300  | -2.21465900 | H           | -1.98629900 | 3.79425100  | 4.29800900  |
| H    | 3.54247200  | 2.81704400  | -0.76781000 | H           | -3.26793300 | 2.55668800  | 4.16025800  |
| H    | 2.89824300  | 4.90873200  | -1.91579800 | H           | -1.81857500 | 2.20500200  | 5.09899100  |
| C    | 1.94896100  | 0.75479100  | -0.06610700 | Co          | -0.82864800 | 0.70429500  | 0.93787000  |
| O    | 1.19092600  | 0.25378700  | 0.79309900  | C           | -2.43411900 | -1.88867900 | 1.49747200  |
| N    | 3.18567600  | 0.25546900  | -0.29449600 | O           | -1.41821700 | -1.45845700 | 0.94579000  |
| C    | -2.07504600 | 1.36080900  | -0.57979000 | O           | -3.05151000 | -1.27998900 | 2.49260800  |
| C    | -3.21303600 | 0.45823200  | -0.82066800 | C           | -3.08557100 | -3.18230000 | 1.09615500  |
| C    | -4.39693500 | 0.54257100  | -0.07116700 | H           | -3.09034500 | -3.87326600 | 1.94509900  |
| C    | -3.11292800 | -0.53750100 | -1.81128900 | H           | -4.12549000 | -2.99107800 | 0.81859900  |
| C    | -5.44925100 | -0.33875900 | -0.27942600 | H           | -2.55237600 | -3.62579400 | 0.25623000  |
| H    | -4.48045200 | 1.30359000  | 0.70024700  | H           | 3.74172200  | 0.65689900  | -1.04603900 |
| C    | -4.16634000 | -1.43181400 | -2.01910200 | H           | -2.58986400 | -0.41148600 | 2.70552300  |
| C    | -5.33455800 | -1.34115400 | -1.25244500 | O           | -6.40480100 | -2.18209700 | -1.37369500 |
| H    | -6.36004900 | -0.28056700 | 0.30732100  | C           | -6.32902300 | -3.21682700 | -2.34203400 |
| H    | -4.06273500 | -2.19250200 | -2.78456500 | H           | -7.26897500 | -3.76759800 | -2.27139900 |
| C    | 3.85017000  | -0.79971200 | 0.34051100  | H           | -6.22432800 | -2.81663600 | -3.35876600 |
| C    | 5.16678300  | -1.05517600 | -0.16894500 | H           | -5.49610600 | -3.90292400 | -2.13987800 |
| C    | 3.34842700  | -1.57364100 | 1.37158800  |             |             |             |             |
| C    | 5.94580700  | -2.10612900 | 0.39685200  | TS7_S       |             |             |             |
| C    | 4.13840200  | -2.61161000 | 1.91951700  | C           | -5.37143500 | -0.88698700 | 0.38626600  |
| H    | 2.35540900  | -1.38393400 | 1.75117800  | C           | -4.26454700 | -0.63198200 | 1.19257700  |
| C    | 6.82411900  | -0.49267600 | -1.66402500 | C           | -2.98484100 | -0.98129100 | 0.75887900  |
| C    | 7.23838700  | -2.31003900 | -0.14839700 | C           | -2.80650200 | -1.64191900 | -0.46922300 |
| C    | 5.40508600  | -2.88173800 | 1.45453000  | C           | -3.92161100 | -1.89562600 | -1.26830200 |
| H    | 3.72075900  | -3.20332100 | 2.72812300  | C           | -5.19741800 | -1.51298300 | -0.84850200 |
| C    | 7.67937100  | -1.50775100 | -1.17560600 | H           | -6.36398800 | -0.59736300 | 0.71769200  |
| H    | 7.15387700  | 0.15219900  | -2.47609900 | H           | -4.37626000 | -0.14553200 | 2.15579200  |
| H    | 7.86548200  | -3.10064200 | 0.25399400  | H           | -3.79749000 | -2.39512600 | -2.22368700 |
| H    | 6.00047200  | -3.68163100 | 1.88400600  | H           | -6.05477700 | -1.71111100 | -1.48516000 |
| H    | 8.66317600  | -1.63947400 | -1.61303900 | C           | -1.41220600 | -2.08748200 | -0.82383400 |
| N    | 5.61488800  | -0.26848100 | -1.18492600 | C           | -0.49252000 | -0.93525100 | -0.99959800 |
| C    | -0.79222500 | 1.05516300  | -1.07815800 | C           | 0.93424700  | -0.94487400 | -1.25250000 |
| C    | -1.86827800 | -0.57902600 | -2.66995800 | C           | 1.46756600  | 0.12954900  | -2.00937600 |
| C    | -0.60344300 | -0.24911100 | -1.86606300 | C           | 1.85391400  | -1.87184500 | -0.72677700 |
| H    | -1.76959300 | -1.55968900 | -3.14787400 | C           | 2.82115900  | 0.27084900  | -2.22287100 |

|    |             |             |             |       |             |             |             |
|----|-------------|-------------|-------------|-------|-------------|-------------|-------------|
| H  | 0.78634100  | 0.88049700  | -2.39792400 | H     | 5.87343800  | -1.25251200 | -0.15345400 |
| C  | 3.22547800  | -1.73603800 | -0.92133000 |       |             |             |             |
| H  | 1.51642000  | -2.69286900 | -0.11445700 | TS7_T |             |             |             |
| C  | 3.72052400  | -0.65315000 | -1.65669100 | C     | 1.98164200  | -4.66858800 | 0.01426200  |
| H  | 3.21916800  | 1.10476300  | -2.79055400 | C     | 0.89315200  | -3.85287800 | -0.27900200 |
| H  | 3.89458400  | -2.45978500 | -0.47423400 | C     | 1.06591100  | -2.53636200 | -0.73611300 |
| C  | -1.81400400 | -0.72137400 | 1.64855700  | C     | 2.38612600  | -2.03872300 | -0.89318000 |
| O  | -1.85954600 | -0.96537600 | 2.85022300  | C     | 3.47187900  | -2.88683800 | -0.62507900 |
| N  | -0.69097000 | -0.17514100 | 1.01079700  | C     | 3.27921200  | -4.18482100 | -0.16819000 |
| Co | -0.88996600 | 1.57268700  | 0.17478900  | H     | 1.81744800  | -5.68423000 | 0.36113700  |
| C  | -2.46498200 | 2.88894000  | -0.91537000 | H     | -0.11438700 | -4.24620900 | -0.19096100 |
| O  | -2.76025700 | 1.72767900  | -0.48166200 | H     | 4.47029200  | -2.48874200 | -0.76496900 |
| O  | -1.26702600 | 3.29251300  | -0.74552000 | H     | 4.13550600  | -4.81705400 | 0.04519000  |
| C  | -3.50060300 | 3.76240300  | -1.56454800 | C     | 2.74662400  | -0.63068300 | -1.27098900 |
| H  | -3.03121000 | 4.48028300  | -2.24011900 | O     | 3.82299800  | -0.38962300 | -1.81224300 |
| H  | -4.23006100 | 3.15211900  | -2.10146900 | N     | 1.79233200  | 0.35230700  | -0.91666600 |
| H  | -4.03356700 | 4.31999600  | -0.78561100 | C     | -1.23339100 | -1.74478900 | -0.29678000 |
| C  | -1.01430100 | -3.44514600 | -0.26027000 | C     | -2.55459100 | -1.12885700 | -0.43951500 |
| C  | -1.22284700 | -3.29593300 | -1.73651800 | C     | -3.58457000 | -1.63089600 | 0.38670000  |
| H  | -1.79196300 | -3.94738900 | 0.30605300  | C     | -2.88402400 | -0.06667600 | -1.29969700 |
| H  | -0.01686700 | -3.61436300 | 0.11898200  | C     | -4.87356800 | -1.13224500 | 0.33178700  |
| H  | -0.34312800 | -3.28239900 | -2.37116500 | H     | -3.35541700 | -2.43252800 | 1.08254800  |
| H  | -2.10362200 | -3.73900100 | -2.18801500 | C     | -4.17609000 | 0.45191700  | -1.36013300 |
| C  | 0.56661800  | -0.29960800 | 1.62479700  | H     | -2.12864700 | 0.39947900  | -1.91663200 |
| C  | 1.46637900  | 0.74836600  | 1.30145300  | C     | -5.18421300 | -0.08417700 | -0.54919900 |
| C  | 1.03295000  | -1.36561800 | 2.38149900  | H     | -5.65829100 | -1.52906400 | 0.96701300  |
| C  | 2.83048700  | 0.71028100  | 1.68550000  | H     | -4.38119000 | 1.27647100  | -2.03154300 |
| C  | 2.38446300  | -1.39965400 | 2.79040100  | C     | 2.20820400  | 1.69916500  | -0.76189500 |
| H  | 0.36012400  | -2.16625700 | 2.66006600  | C     | 1.44036300  | 2.47073100  | 0.16545300  |
| C  | 1.70880500  | 2.80802100  | 0.24843600  | C     | 3.17041600  | 2.35220600  | -1.54965300 |
| C  | 3.64445300  | 1.80058300  | 1.28316500  | C     | 1.69287900  | 3.87329100  | 0.32484400  |
| C  | 3.27610000  | -0.40271400 | 2.44388900  | C     | 3.41961600  | 3.71894700  | -1.37360800 |
| H  | 2.72657400  | -2.24201700 | 3.38445100  | H     | 3.73028500  | 1.78179100  | -2.27420100 |
| C  | 3.07916000  | 2.83923700  | 0.57378600  | C     | -0.29110400 | 2.54856700  | 1.76604700  |
| H  | 1.23292500  | 3.60835500  | -0.30667400 | C     | 0.88952200  | 4.57720900  | 1.25660500  |
| H  | 4.69873500  | 1.80866200  | 1.54314100  | C     | 2.70708000  | 4.47713900  | -0.45521500 |
| H  | 4.31367900  | -0.44830200 | 2.76088000  | H     | 4.18692100  | 4.19249900  | -1.97959900 |
| H  | 3.67364200  | 3.68966600  | 0.25798700  | C     | -0.10068300 | 3.91229300  | 1.97185100  |
| N  | 0.92363400  | 1.78726100  | 0.58798100  | H     | -1.03271200 | 1.97397700  | 2.30901300  |
| H  | -0.99742800 | -0.11627100 | -1.50426200 | H     | 1.05913700  | 5.64022500  | 1.40046800  |
| O  | 5.03393900  | -0.40276300 | -1.86725500 | H     | 2.90433400  | 5.53791400  | -0.33299300 |
| C  | 5.98771700  | -1.25774400 | -1.24409900 | H     | -0.72243100 | 4.43755000  | 2.68889500  |
| H  | 5.90756300  | -2.28687100 | -1.61392200 | N     | 0.45248900  | 1.85137300  | 0.88485400  |
| H  | 6.96752800  | -0.85703200 | -1.50774300 | C     | -0.13434500 | -1.73055100 | -1.11078800 |

C 0.47578800 0.38171500 -2.35526000  
 C -0.04735100 -1.02463100 -2.45736800  
 H 1.07555500 0.75203100 -3.18195900  
 H -0.18892700 1.12761500 -1.92831900  
 H -1.03710500 -1.04086900 -2.93239400  
 H 0.61562600 -1.61093800 -3.09994000  
 H -1.15251000 -2.36258500 0.59383600  
 C 0.23812500 -0.99749600 2.96037300  
 O 1.32524100 -1.05441700 2.27731200  
 O -0.80093400 -0.52016600 2.42828600  
 C 0.24716400 -1.48321200 4.38579100  
 H 0.79895500 -0.76500900 5.00221500  
 H -0.76878500 -1.57746700 4.77162200  
 H 0.76977800 -2.44106600 4.45283200  
 Co 0.53980300 -0.15043200 0.66604400  
 O -6.47149200 0.34411500 -0.53379400  
 C -6.83040300 1.42163200 -1.39196100  
 H -6.67216100 1.16647400 -2.44688900  
 H -7.89332900 1.59958600 -1.22170200  
 H -6.26908900 2.33245500 -1.15021500

12\_Q

C 5.70931500 -0.19831100 -0.35276000  
 C 4.53000700 -0.90963400 -0.23763700  
 C 3.27188000 -0.24266800 -0.23266100  
 C 3.23514100 1.18139700 -0.43935800  
 C 4.44855000 1.86231600 -0.53644700  
 C 5.67911900 1.19952800 -0.48134300  
 H 6.66080400 -0.72275300 -0.33609100  
 H 4.53528900 -1.98823700 -0.12237500  
 H 4.44791100 2.93911200 -0.68039200  
 H 6.60203700 1.76549300 -0.56056900  
 C 1.91428900 1.88947400 -0.60610000  
 C 0.74295600 0.92075100 -0.81847300  
 C -0.66491400 1.47310300 -0.86820100  
 C -1.40389500 1.29931200 -2.05102800  
 C -1.30840600 2.08910500 0.21221600  
 C -2.71931000 1.72922800 -2.15672400  
 H -0.94154000 0.79192000 -2.89105100  
 C -2.63342100 2.52291000 0.12509600  
 H -0.78948300 2.22923100 1.15130200  
 C -3.34675300 2.34646200 -1.06548900  
 H -3.28307000 1.59227600 -3.07374700  
 H -3.09188400 2.99303800 0.98642000

C 2.07883200 -0.96952400 -0.02501500  
 O 1.89957500 -2.26483000 -0.03505700  
 N 0.82978000 -0.24723800 0.11327900  
 Co -0.06651000 -2.16765500 -0.50617800  
 C -1.25695500 -2.69006800 -2.55546600  
 O -0.37848800 -1.76793300 -2.54666400  
 O -1.46600800 -3.36596400 -1.49087200  
 C -2.07261000 -2.94696900 -3.79205400  
 H -2.48994500 -3.95495400 -3.78139800  
 H -2.89879800 -2.22686400 -3.81710600  
 H -1.46565200 -2.79183500 -4.68648000  
 C 1.73443500 3.25045800 0.05349600  
 C 1.87297800 3.15976800 -1.43453700  
 H 2.57967100 3.61516200 0.62960400  
 H 0.76504400 3.52083400 0.45316200  
 H 0.97671500 3.32181900 -2.02622800  
 H 2.79175500 3.48690400 -1.90916300  
 C 0.49420500 -0.04094400 1.50389900  
 C -0.56570300 -0.83428400 2.02784300  
 C 1.13780000 0.85629800 2.34044100  
 C -1.02388400 -0.62942000 3.36396700  
 C 0.70015600 1.04259200 3.66849500  
 H 1.97401900 1.43032100 1.96601000  
 C -2.13136800 -2.52780500 1.67662500  
 C -2.11090700 -1.42453200 3.80849600  
 C -0.37303600 0.33463700 4.17167100  
 H 1.21430300 1.76560300 4.29379900  
 C -2.67152600 -2.35928100 2.96609200  
 H -2.51913600 -3.27419800 0.99072000  
 H -2.48651500 -1.28991200 4.81873800  
 H -0.71917000 0.49249500 5.18840200  
 H -3.50357300 -2.97850500 3.28135300  
 N -1.11695300 -1.79757500 1.23050200  
 H 0.92526300 0.45668600 -1.79159300  
 O -4.63770800 2.73287800 -1.25842700  
 C -5.31476600 3.35531000 -0.17488300  
 H -4.82539700 4.29064900 0.12458700  
 H -6.32063000 3.57797400 -0.53513700  
 H -5.38426400 2.68966400 0.69475700

12\_S

C -5.68583100 -0.34783900 0.12587200  
 C -4.55486200 0.28098800 0.62712100  
 C -3.28111900 -0.25680100 0.39122400

|    |             |             |             |      |             |             |             |
|----|-------------|-------------|-------------|------|-------------|-------------|-------------|
| C  | -3.12570400 | -1.44342600 | -0.35742000 | C    | 1.96325000  | -1.08512400 | 3.63768000  |
| C  | -4.28160000 | -2.08159000 | -0.82371600 | H    | 0.63290700  | -2.70009100 | 4.08944300  |
| C  | -5.54383500 | -1.54101800 | -0.58914000 | C    | 3.43921500  | 2.01986100  | 2.16049400  |
| H  | -6.67005300 | 0.07576600  | 0.29775900  | H    | 2.46714000  | 3.20080500  | 0.60702400  |
| H  | -4.62858900 | 1.18732400  | 1.21759600  | H    | 4.11573000  | 0.66467700  | 3.69395600  |
| H  | -4.20268300 | -3.00466600 | -1.38686200 | H    | 2.69903900  | -1.37268100 | 4.38300100  |
| H  | -6.42210000 | -2.05041500 | -0.97479600 | H    | 4.29689800  | 2.68147400  | 2.22149800  |
| C  | -1.74065600 | -1.95069900 | -0.61606100 | N    | 1.32669800  | 1.56187900  | 1.09760100  |
| C  | -0.76506600 | -0.77694200 | -0.66032300 | H    | -1.19678500 | -0.09206000 | -1.39320200 |
| C  | 0.65307200  | -1.03265500 | -1.12104200 | O    | 4.52058000  | -1.45392600 | -2.65748900 |
| C  | 1.07366600  | -0.39986400 | -2.30451800 | C    | 5.49520900  | -2.23145700 | -1.97466800 |
| C  | 1.57995400  | -1.83872300 | -0.45322200 | H    | 5.19430200  | -3.28419000 | -1.90105000 |
| C  | 2.35875300  | -0.56050700 | -2.79841500 | H    | 6.40761200  | -2.16186700 | -2.56937600 |
| H  | 0.37710400  | 0.24087400  | -2.83616900 | H    | 5.69072800  | -1.84015800 | -0.96844400 |
| C  | 2.88304700  | -2.00368000 | -0.93017300 |      |             |             |             |
| H  | 1.31633600  | -2.33225700 | 0.47224000  | 12_T |             |             |             |
| C  | 3.28006200  | -1.36181100 | -2.10733400 | C    | 5.74557100  | -0.14380600 | -0.17551900 |
| H  | 2.67711100  | -0.06399400 | -3.70890600 | C    | 4.57225000  | 0.11214700  | -0.87229900 |
| H  | 3.57143300  | -2.62762000 | -0.37382300 | C    | 3.33587800  | -0.30119400 | -0.35745200 |
| C  | -2.13772900 | 0.36099300  | 1.10307400  | C    | 3.26211600  | -0.98212900 | 0.87811900  |
| O  | -2.27643500 | 1.05046600  | 2.09661700  | C    | 4.45864800  | -1.25890400 | 1.54989700  |
| N  | -0.80774700 | 0.04873200  | 0.62099500  | C    | 5.68415600  | -0.84362500 | 1.03308600  |
| Co | -0.07419800 | 1.84303400  | -0.05268400 | H    | 6.70085100  | 0.18599200  | -0.57112000 |
| C  | -0.64242200 | 3.37045100  | -1.69360600 | H    | 4.58424500  | 0.61872800  | -1.83092700 |
| O  | -1.38621600 | 2.35995500  | -1.44846800 | H    | 4.43936300  | -1.79171700 | 2.49407100  |
| O  | 0.41687100  | 3.50231700  | -0.99966500 | H    | 6.59585300  | -1.06013100 | 1.58225000  |
| C  | -1.02599400 | 4.37612100  | -2.74101200 | C    | 1.91194100  | -1.35968500 | 1.40806000  |
| H  | -0.16656800 | 4.98504300  | -3.02619600 | C    | 0.87734200  | -0.36610100 | 0.88954100  |
| H  | -1.44024600 | 3.86888400  | -3.61603600 | C    | -0.52618100 | -0.39890600 | 1.45354800  |
| H  | -1.80518700 | 5.03256200  | -2.33713600 | C    | -0.97075300 | 0.73685600  | 2.15547900  |
| C  | -1.37174500 | -3.33947500 | -0.11380200 | C    | -1.42782700 | -1.45790000 | 1.29431100  |
| C  | -1.52162500 | -3.09201200 | -1.58362100 | C    | -2.25834800 | 0.81765800  | 2.66670100  |
| H  | -2.15878300 | -3.88484800 | 0.39828600  | H    | -0.29440800 | 1.57633300  | 2.28572900  |
| H  | -0.37652200 | -3.50769600 | 0.27823600  | C    | -2.72636300 | -1.39205100 | 1.80051300  |
| H  | -0.61385400 | -3.04634100 | -2.17545400 | H    | -1.14236300 | -2.34604900 | 0.74694000  |
| H  | -2.37599200 | -3.50472500 | -2.10782500 | C    | -3.15118800 | -0.24786400 | 2.48710100  |
| C  | 0.07864800  | -0.36395900 | 1.70035300  | H    | -2.59642000 | 1.70017400  | 3.19926100  |
| C  | 1.22101500  | 0.43513300  | 1.88950300  | H    | -3.39363300 | -2.23082000 | 1.64612700  |
| C  | -0.14715600 | -1.46794000 | 2.49510000  | C    | 2.14376800  | -0.15908200 | -1.23434000 |
| C  | 2.19907600  | 0.07450000  | 2.85494000  | O    | 2.23472000  | 0.02052100  | -2.44062800 |
| C  | 0.81039800  | -1.82620800 | 3.47063000  | N    | 0.87514900  | -0.31973800 | -0.62330200 |
| H  | -1.04448500 | -2.06078900 | 2.36227000  | Co   | -0.18774800 | 1.75345200  | -0.81495000 |
| C  | 2.41881700  | 2.32480300  | 1.24308900  | C    | 0.30994400  | 3.96370300  | 0.14022300  |
| C  | 3.34245900  | 0.90726300  | 2.97204500  | O    | 1.02651000  | 2.91558200  | 0.33466000  |

|       |             |             |             |   |             |             |             |
|-------|-------------|-------------|-------------|---|-------------|-------------|-------------|
| O     | -0.71055900 | 3.91193300  | -0.59958500 | H | 4.13550600  | -4.81705400 | 0.04519000  |
| C     | 0.72156600  | 5.25104400  | 0.81359000  | C | 2.74662400  | -0.63068300 | -1.27098900 |
| H     | -0.00474400 | 6.04284200  | 0.62634000  | O | 3.82299800  | -0.38962300 | -1.81224300 |
| H     | 0.82403000  | 5.08679600  | 1.89071800  | N | 1.79233200  | 0.35230700  | -0.91666600 |
| H     | 1.70299600  | 5.55931800  | 0.43838500  | C | -1.23339100 | -1.74478900 | -0.29678000 |
| C     | 1.61213000  | -2.82914800 | 1.66179200  | C | -2.55459100 | -1.12885700 | -0.43951500 |
| C     | 1.76195900  | -1.88559400 | 2.81685700  | C | -3.58457000 | -1.63089600 | 0.38670000  |
| H     | 2.42231100  | -3.52269900 | 1.45787700  | C | -2.88402400 | -0.06667600 | -1.29969700 |
| H     | 0.62457100  | -3.20954000 | 1.43089800  | C | -4.87356800 | -1.13224500 | 0.33178700  |
| H     | 0.85893400  | -1.59154400 | 3.34133400  | H | -3.35541700 | -2.43252800 | 1.08254800  |
| H     | 2.64184000  | -1.95441400 | 3.44674700  | C | -4.17609000 | 0.45191700  | -1.36013300 |
| C     | -0.02126800 | -1.19608400 | -1.34540400 | H | -2.12864700 | 0.39947900  | -1.91663200 |
| C     | -1.23664600 | -0.67472200 | -1.84711700 | C | -5.18421300 | -0.08417700 | -0.54919900 |
| C     | 0.29742000  | -2.53169100 | -1.52444300 | H | -5.65829100 | -1.52906400 | 0.96701300  |
| C     | -2.15682600 | -1.55404300 | -2.49444600 | H | -4.38119000 | 1.27647100  | -2.03154300 |
| C     | -0.60638800 | -3.39887800 | -2.16613900 | C | 2.20820400  | 1.69916500  | -0.76189500 |
| H     | 1.24569000  | -2.90415100 | -1.15478700 | C | 1.44036300  | 2.47073100  | 0.16545300  |
| C     | -2.66185300 | 1.15059500  | -2.18913200 | C | 3.17041600  | 2.35220600  | -1.54965300 |
| C     | -3.37383500 | -1.00817700 | -2.98265000 | C | 1.69287900  | 3.87329100  | 0.32484400  |
| C     | -1.81618500 | -2.92247500 | -2.63004100 | C | 3.41961600  | 3.71894700  | -1.37360800 |
| H     | -0.34586800 | -4.44505500 | -2.29177600 | H | 3.73028500  | 1.78179100  | -2.27420100 |
| C     | -3.61175300 | 0.34460900  | -2.82618200 | C | -0.29110400 | 2.54856700  | 1.76604700  |
| H     | -2.82859800 | 2.21348900  | -2.05254300 | C | 0.88952200  | 4.57720900  | 1.25660500  |
| H     | -4.09105500 | -1.65667500 | -3.47561500 | C | 2.70708000  | 4.47713900  | -0.45521500 |
| H     | -2.52055900 | -3.58776800 | -3.12094300 | H | 4.18692100  | 4.19249900  | -1.97959900 |
| H     | -4.52710600 | 0.79961600  | -3.18961000 | C | -0.10068300 | 3.91229300  | 1.97185100  |
| N     | -1.49982200 | 0.67497000  | -1.69900500 | H | -1.03271200 | 1.97397700  | 2.30901300  |
| H     | 1.28015200  | 0.61125200  | 1.16686700  | H | 1.05913700  | 5.64022500  | 1.40046800  |
| O     | -4.39304100 | -0.07994000 | 3.01237200  | H | 2.90433400  | 5.53791400  | -0.33299300 |
| C     | -5.34466400 | -1.12026700 | 2.82539600  | H | -0.72243100 | 4.43755000  | 2.68889500  |
| H     | -5.02112700 | -2.05466900 | 3.30081300  | N | 0.45248900  | 1.85137300  | 0.88485400  |
| H     | -6.26374200 | -0.77654700 | 3.30279400  | C | -0.13434500 | -1.73055100 | -1.11078800 |
| H     | -5.53801800 | -1.30308000 | 1.76111300  | C | 0.47578800  | 0.38171500  | -2.35526000 |
| TS8_Q |             |             |             | C | -0.04735100 | -1.02463100 | -2.45736800 |
| C     | 1.98164200  | -4.66858800 | 0.01426200  | H | 1.07555500  | 0.75203100  | -3.18195900 |
| C     | 0.89315200  | -3.85287800 | -0.27900200 | H | -0.18892700 | 1.12761500  | -1.92831900 |
| C     | 1.06591100  | -2.53636200 | -0.73611300 | H | -1.03710500 | -1.04086900 | -2.93239400 |
| C     | 2.38612600  | -2.03872300 | -0.89318000 | H | 0.61562600  | -1.61093800 | -3.09994000 |
| C     | 3.47187900  | -2.88683800 | -0.62507900 | H | -1.15251000 | -2.36258500 | 0.59383600  |
| C     | 3.27921200  | -4.18482100 | -0.16819000 | C | 0.23812500  | -0.99749600 | 2.96037300  |
| H     | 1.81744800  | -5.68423000 | 0.36113700  | O | 1.32524100  | -1.05441700 | 2.27731200  |
| H     | -0.11438700 | -4.24620900 | -0.19096100 | O | -0.80093400 | -0.52016600 | 2.42828600  |
| H     | 4.47029200  | -2.48874200 | -0.76496900 | C | 0.24716400  | -1.48321200 | 4.38579100  |
|       |             |             |             | H | 0.79895500  | -0.76500900 | 5.00221500  |

H -0.76878500 -1.57746700 4.77162200  
H 0.76977800 -2.44106600 4.45283200  
Co 0.53980300 -0.15043200 0.66604400  
O -6.47149200 0.34411500 -0.53379400  
C -6.83040300 1.42163200 -1.39196100  
H -6.67216100 1.16647400 -2.44688900  
H -7.89332900 1.59958600 -1.22170200  
H -6.26908900 2.33245500 -1.15021500

TS8\_S

C -0.93497700 5.00164300 0.61828900  
C -0.07560200 4.00010500 0.17665000  
C -0.56802900 2.79870100 -0.35510100  
C -1.96415500 2.62725600 -0.45211800  
C -2.82089600 3.65713300 -0.03763200  
C -2.31601000 4.83292100 0.50680300  
H -0.52575600 5.91865400 1.03140200  
H 0.99754800 4.15251800 0.21963000  
H -3.88933100 3.50447800 -0.13636900  
H -2.99429000 5.61339700 0.83719200  
C -2.64405300 1.39263700 -0.95615500  
O -3.74969900 1.48679000 -1.48531400  
N -2.02600600 0.14482400 -0.70629900  
C 1.51921600 1.52151600 -0.17021000  
C 2.71327300 0.73128400 -0.46283000  
C 3.80318500 0.90672100 0.42022000  
C 2.88696200 -0.18975700 -1.51051000  
C 4.99745400 0.22787400 0.25810600  
H 3.69591800 1.59651600 1.25224500  
C 4.08176500 -0.88577300 -1.68482800  
H 2.08260500 -0.40700400 -2.19841700  
C 5.14978000 -0.67793000 -0.80308900  
H 5.82688000 0.37568300 0.94160900  
H 4.16579400 -1.59015700 -2.50323400  
C -2.85608400 -1.01375700 -0.74153600  
C -2.39647500 -2.05488300 0.10718600  
C -3.97277400 -1.24941900 -1.53168300  
C -3.08185200 -3.29613700 0.20161800  
C -4.65736800 -2.48391900 -1.43970800  
H -4.33345200 -0.48224500 -2.19730200  
C -0.78952700 -2.72184600 1.65360400  
C -2.55689200 -4.26281800 1.09539400  
C -4.23853500 -3.48806100 -0.59477400  
H -5.53714800 -2.63201900 -2.05850500

C -1.42198600 -3.96935500 1.81798000  
H 0.11688400 -2.45268900 2.18039100  
H -3.05652000 -5.22144700 1.19877000  
H -4.77745300 -4.42823400 -0.52981100  
H -0.99504200 -4.68560300 2.51125000  
N -1.25710600 -1.79402000 0.82117600  
C 0.37049200 1.76704500 -0.86346000  
C -0.59544300 -0.24613800 -1.89120400  
C 0.00307200 1.10591200 -2.18156400  
H -1.27713900 -0.63596600 -2.64374600  
H 0.11277200 -1.01106600 -1.57621600  
H 0.88177500 1.00796100 -2.82807600  
H -0.71407200 1.72750000 -2.72283400  
H 1.58825200 2.04855800 0.77588000  
C 1.11413600 0.32028900 2.66971400  
O 0.51621700 1.39553100 2.80854700  
O 0.93049200 -0.51430100 1.69308000  
C 2.16228800 -0.13205000 3.67826800  
H 1.77385200 -0.97919100 4.25556900  
H 3.06403900 -0.47588600 3.16344500  
H 2.40856900 0.67822200 4.36688400  
Co -0.47020300 -0.11471500 0.44249500  
O 6.35273900 -1.30119600 -0.88685200  
C 6.55321000 -2.23268900 -1.94354800  
H 6.45458400 -1.75488300 -2.92603600  
H 7.57225800 -2.60488200 -1.82708600  
H 5.85270300 -3.07415500 -1.87711100

TS8\_T

C 0.76649900 4.97997800 -1.38272500  
C -0.09070600 4.02236600 -0.85003300  
C 0.38875600 2.92757900 -0.10917000  
C 1.78406000 2.82625100 0.10838500  
C 2.63260600 3.82276500 -0.40097300  
C 2.13942600 4.88307400 -1.15241400  
H 0.35998000 5.81121900 -1.95103000  
H -1.16204500 4.13802100 -0.97431500  
H 3.69384200 3.73194600 -0.20119800  
H 2.81938400 5.63208500 -1.54655000  
C 2.49905200 1.71276800 0.82457500  
O 3.56775800 1.95136400 1.39229500  
N 1.97601600 0.41710400 0.69303700  
C -1.70223000 1.64335000 -0.21703400  
C -2.90249700 0.88200800 0.12179500





C -0.52425700 -1.57173000 -1.07434000  
 C 0.07660500 0.60462400 -2.20262600  
 C -0.54672900 -0.77475800 -2.36663400  
 H 0.36112300 1.03845100 -3.16970600  
 H -0.61343000 1.29588800 -1.70792100  
 H -1.56364000 -0.67696600 -2.75100900  
 H 0.02648800 -1.33068100 -3.11597400  
 H -1.47983300 -2.34354900 0.63439900  
 C 1.58205900 -1.38370200 2.60042500  
 O 2.36794100 -0.81309700 1.78360100  
 O 0.32050300 -1.32467800 2.39470300  
 C 2.11855800 -2.16833500 3.76634800  
 H 1.42482400 -2.13273700 4.60897600  
 H 2.22177000 -3.21360200 3.45336300  
 H 3.10252200 -1.79998800 4.06171700  
 Co 0.67619300 -0.34466600 0.60078200  
 O -6.82224200 0.51138600 0.13630800  
 C -7.23626400 1.62068500 -0.64688000  
 H -7.16858100 1.40660400 -1.72133700  
 H -8.27985600 1.80464500 -0.38486200  
 H -6.64706400 2.51920100 -0.42192200

13\_S

C 2.11328100 -4.15577000 -0.52118600  
 C 0.91753300 -3.46617400 -0.54707500  
 C 0.84181400 -2.15011300 -1.06626700  
 C 2.06029200 -1.53261200 -1.50388500  
 C 3.26222800 -2.27479300 -1.50076400  
 C 3.29284100 -3.56775400 -1.02049500  
 H 2.13886800 -5.17095500 -0.13561100  
 H 0.00398900 -3.93998600 -0.20400600  
 H 4.16581000 -1.78058700 -1.83887500  
 H 4.22543500 -4.12243500 -1.00610900  
 C 2.18288200 -0.09629700 -1.79928100  
 O 3.17602900 0.44662100 -2.24626600  
 N 1.00408300 0.74239300 -1.38012200  
 C -1.38180600 -1.47111900 -0.20142700  
 C -2.74633900 -0.93742300 -0.13298700  
 C -3.61472100 -1.53186000 0.81134000  
 C -3.27391500 0.11894400 -0.89525100  
 C -4.92885500 -1.12310100 0.96245200  
 H -3.23709200 -2.33868300 1.43307000  
 C -4.59407500 0.54526600 -0.75342600  
 H -2.65018900 0.65341100 -1.59708800

C -5.43599600 -0.07971800 0.17367400  
 H -5.58408200 -1.59448800 1.68762300  
 H -4.94912000 1.36893800 -1.36074000  
 C 1.40430000 2.08475800 -0.99429200  
 C 1.39927900 2.32940300 0.39743500  
 C 1.76225000 3.08151900 -1.87418600  
 C 1.76254500 3.60827400 0.90086200  
 C 2.12375400 4.35675500 -1.37986700  
 H 1.78170200 2.88980300 -2.93999900  
 C 0.99453700 1.50323900 2.53287900  
 C 1.72324700 3.79174400 2.30694900  
 C 2.12763000 4.61731900 -0.02658100  
 H 2.40787700 5.13301200 -2.08287100  
 C 1.33924700 2.74182100 3.11042500  
 H 0.68613900 0.65649900 3.13328200  
 H 1.99315200 4.75485700 2.72918700  
 H 2.40760700 5.59740600 0.34778300  
 H 1.29595000 2.84623500 4.18886300  
 N 1.02118600 1.29352000 1.22043200  
 C -0.44131800 -1.44513700 -1.22161600  
 C -0.09336400 0.74540500 -2.39528000  
 C -0.60954800 -0.68562700 -2.52829800  
 H 0.26309900 1.14400700 -3.35145000  
 H -0.85590000 1.42121500 -2.00493400  
 H -1.65581400 -0.68158700 -2.84298000  
 H -0.04498400 -1.20882900 -3.30533700  
 H -1.15028700 -2.12869700 0.62975100  
 C 1.68547700 -1.74720600 2.31612300  
 O 2.77669700 -1.37911400 1.87462500  
 O 0.51913300 -1.35392300 1.88144500  
 C 1.59692500 -2.75607400 3.45487900  
 H 0.86396700 -2.43738100 4.20230300  
 H 1.25674600 -3.71821000 3.05523500  
 H 2.57353700 -2.89375000 3.92257500  
 Co 0.56636400 -0.29941300 0.28511900  
 O -6.73679400 0.25486800 0.38796100  
 C -7.29040600 1.31074700 -0.38650900  
 H -7.26806000 1.08027400 -1.45905300  
 H -8.32820400 1.40949000 -0.06368000  
 H -6.76767300 2.25909600 -0.20950700

13\_T

C -1.89191400 4.96189400 -0.04274900  
 C -0.88244600 4.03196800 -0.28352400

|   |             |             |             |      |             |             |             |
|---|-------------|-------------|-------------|------|-------------|-------------|-------------|
| C | -1.16605300 | 2.66784900  | -0.44945700 | H    | 0.08641100  | 1.83558700  | -2.87238900 |
| C | -2.52064200 | 2.25433100  | -0.35369100 | H    | 1.03178300  | 2.47068900  | 0.92437600  |
| C | -3.52545900 | 3.19594700  | -0.09921300 | C    | -0.40161300 | -0.62803800 | 3.01915700  |
| C | -3.22169300 | 4.54535800  | 0.04505000  | O    | -1.44896400 | -0.49053900 | 2.30993200  |
| H | -1.63956000 | 6.01181500  | 0.07452600  | O    | 0.73253200  | -0.27134600 | 2.57582700  |
| H | 0.15003700  | 4.35939000  | -0.35375600 | C    | -0.50992500 | -1.27399700 | 4.38280600  |
| H | -4.54479600 | 2.83974300  | 0.00196800  | H    | 0.29503200  | -0.93587000 | 5.03878300  |
| H | -4.01206600 | 5.26477200  | 0.23483100  | H    | -1.48211500 | -1.06313600 | 4.83364100  |
| C | -2.94733700 | 0.81449200  | -0.37548300 | H    | -0.42104000 | -2.36053200 | 4.26467500  |
| O | -3.96136900 | 0.42685800  | 0.18275000  | Co   | -0.27384900 | 0.26230100  | 0.70911800  |
| N | -2.06834700 | -0.05295500 | -1.05022900 | O    | 6.50987900  | 0.19655900  | -0.50703100 |
| C | 1.08913000  | 1.74522000  | 0.11348800  | C    | 6.88447800  | -0.98438200 | -1.20093700 |
| C | 2.46945100  | 1.26995900  | -0.11728400 | H    | 7.97385400  | -1.03212400 | -1.15179300 |
| C | 3.52253000  | 2.01777700  | 0.44817800  | H    | 6.46466200  | -1.88221300 | -0.72930900 |
| C | 2.82542800  | 0.10483000  | -0.81408400 | H    | 6.57453200  | -0.95262200 | -2.25337700 |
| C | 4.85022400  | 1.64390700  | 0.30279900  |      |             |             |             |
| H | 3.28567800  | 2.91412600  | 1.01494600  |      |             |             |             |
| C | 4.15551600  | -0.28619200 | -0.97130500 | 14_Q |             |             |             |
| H | 2.05557700  | -0.54287600 | -1.21200000 | C    | 5.41613000  | -0.02887900 | -0.00383900 |
| C | 5.18116400  | 0.48694000  | -0.41550300 | C    | 5.38891900  | -1.38686700 | -0.35941400 |
| H | 5.64983100  | 2.23112600  | 0.74265900  | C    | 4.18677700  | -1.97681600 | -0.72953400 |
| H | 4.37519700  | -1.19744800 | -1.51465500 | C    | 3.01563700  | -1.20214100 | -0.74336300 |
| C | -2.29942900 | -1.46584800 | -1.00243000 | C    | 3.00525100  | 0.16858400  | -0.37894500 |
| C | -1.24287200 | -2.29587900 | -0.52745700 | C    | 4.24381600  | 0.72789000  | -0.01837100 |
| C | -3.47319700 | -2.03069900 | -1.45258500 | H    | 6.35820500  | 0.42929600  | 0.28838000  |
| C | -1.40875000 | -3.71416200 | -0.56568500 | H    | 6.30429100  | -1.97152800 | -0.34589200 |
| C | -3.64141200 | -3.43385200 | -1.46535800 | H    | 4.13608300  | -3.02438400 | -1.01001400 |
| H | -4.27221600 | -1.38435700 | -1.79505700 | H    | 4.29345500  | 1.77607600  | 0.27096500  |
| C | 0.87050100  | -2.50619800 | 0.40873100  | C    | 1.73966800  | -1.85359900 | -1.13250700 |
| C | -0.33618800 | -4.51679700 | -0.10282300 | O    | 1.62501800  | -3.04932700 | -1.39186100 |
| C | -2.62675900 | -4.26132500 | -1.04332000 | N    | 0.66882100  | -0.93012600 | -1.16032600 |
| H | -4.57761900 | -3.85245800 | -1.82021400 | C    | -0.58697800 | -1.20938200 | -1.53182700 |
| C | 0.80408800  | -3.91501200 | 0.37412200  | C    | -1.51031300 | -0.09138500 | -1.39771500 |
| H | 1.73590800  | -2.00238600 | 0.82469400  | C    | -1.09758300 | -2.43554300 | -2.03003600 |
| H | -0.43531500 | -5.59816100 | -0.12449100 | C    | -2.87037900 | -0.22871900 | -1.77197200 |
| H | -2.74426900 | -5.34073700 | -1.06107000 | C    | -2.44428400 | -2.55004300 | -2.38743500 |
| H | 1.64295800  | -4.49641100 | 0.74034100  | H    | -0.42004800 | -3.27169500 | -2.12111100 |
| N | -0.10536800 | -1.71907200 | -0.02343000 | C    | -1.82192600 | 2.10475200  | -0.75123600 |
| C | -0.04405500 | 1.70543300  | -0.71941900 | C    | -3.70806500 | 0.89872500  | -1.61897300 |
| C | -1.47478100 | 0.45796800  | -2.32124000 | C    | -3.32370200 | -1.48352800 | -2.26669300 |
| C | -0.09285100 | 1.07687500  | -2.09710800 | H    | -2.80680400 | -3.50074200 | -2.76505300 |
| H | -2.16404100 | 1.19195900  | -2.74668000 | C    | -3.17955800 | 2.06970800  | -1.11316000 |
| H | -1.42640400 | -0.37911400 | -3.01902300 | H    | -1.37674400 | 2.99645300  | -0.32389500 |
| H | 0.68048200  | 0.32082200  | -2.20609100 | H    | -4.75551300 | 0.82809100  | -1.89436400 |

|      |             |             |             |    |             |             |             |
|------|-------------|-------------|-------------|----|-------------|-------------|-------------|
| H    | -4.36741000 | -1.59222600 | -2.54475500 | H  | 6.06158700  | -2.67005800 | -0.23850800 |
| H    | -3.79047700 | 2.95631500  | -0.98673800 | H  | 5.56791500  | -0.27459100 | -0.81558300 |
| N    | -1.01418900 | 1.05978300  | -0.89309300 | H  | 1.95128700  | -3.22273400 | 0.91827000  |
| Co   | 1.14200600  | 0.96130400  | -0.44995900 | C  | 3.13961100  | 0.96939800  | -0.59932300 |
| C    | -3.18692400 | -1.82264300 | 1.12866800  | O  | 3.93165600  | 1.80939300  | -1.03687100 |
| C    | -3.57331900 | -0.52914400 | 1.50295500  | N  | 1.81146700  | 1.18212300  | -0.31214900 |
| C    | -2.63375500 | 0.33041500  | 2.08811700  | C  | 1.18824000  | 2.41338700  | -0.28455400 |
| C    | -1.32048500 | -0.09655900 | 2.26412800  | C  | -0.12427300 | 2.38489300  | 0.28893700  |
| C    | -0.90634700 | -1.37987400 | 1.87180000  | C  | 1.68145900  | 3.64278600  | -0.72169700 |
| C    | -1.87437200 | -2.23390400 | 1.30879400  | C  | -0.90366800 | 3.56620600  | 0.43470500  |
| H    | -3.92649200 | -2.47968100 | 0.68449200  | C  | 0.89618800  | 4.80823100  | -0.58769500 |
| H    | -2.90985200 | 1.33254700  | 2.39187900  | H  | 2.67226700  | 3.68427800  | -1.15023400 |
| H    | -0.60089800 | 0.58542400  | 2.70239100  | C  | -1.76874700 | 1.06357200  | 1.27572400  |
| H    | -1.58208000 | -3.23436900 | 1.00330400  | C  | -2.17406800 | 3.42344600  | 1.04955700  |
| C    | 0.47587800  | -1.84632500 | 2.00280700  | C  | -0.36559800 | 4.79354900  | -0.02645900 |
| C    | 1.49562600  | -1.15790800 | 2.51690100  | H  | 1.31188700  | 5.74865500  | -0.93860000 |
| C    | 2.91594800  | -1.13245100 | 2.86398400  | C  | -2.59945700 | 2.18504100  | 1.47646300  |
| C    | 2.00413200  | 0.07677000  | 3.12567000  | H  | -2.08131400 | 0.06620300  | 1.56466100  |
| H    | 3.64650800  | -1.04622300 | 2.06385700  | H  | -2.80055600 | 4.30130800  | 1.18044000  |
| H    | 3.25224700  | -1.71072600 | 3.72340800  | H  | -0.94819500 | 5.70377100  | 0.07430200  |
| H    | 1.73264500  | 0.30372300  | 4.15592200  | H  | -3.56635700 | 2.05118900  | 1.94813000  |
| H    | 2.13396300  | 0.95233800  | 2.49171500  | N  | -0.58349400 | 1.16483800  | 0.69846100  |
| H    | 0.67072600  | -2.85323000 | 1.63615000  | Co | 0.81945400  | -0.26795100 | 0.38137600  |
| C    | 1.28526700  | 3.42454400  | -0.40821000 | C  | -4.19742000 | 0.17744300  | -1.28183000 |
| O    | 1.08387400  | 2.74736100  | 0.66168000  | C  | -4.61155800 | -1.03295900 | -0.70308900 |
| O    | 1.31500100  | 2.84953000  | -1.53366200 | C  | -3.66613700 | -2.03642200 | -0.44329700 |
| C    | 1.52516800  | 4.91188100  | -0.30051600 | C  | -2.32811000 | -1.82649900 | -0.76477900 |
| H    | 2.57976300  | 5.07995500  | -0.05393200 | C  | -1.89802700 | -0.62063300 | -1.33971000 |
| H    | 1.31005300  | 5.40994500  | -1.24767800 | C  | -2.86109100 | 0.37742000  | -1.58498600 |
| H    | 0.92357300  | 5.34203900  | 0.50381300  | H  | -4.93996700 | 0.94488200  | -1.47238400 |
| O    | -4.86833100 | -0.19171700 | 1.24023500  | H  | -3.96134700 | -2.97505400 | 0.00902700  |
| C    | -5.33350900 | 1.06762200  | 1.70731800  | H  | -1.60227800 | -2.59667300 | -0.53685400 |
| H    | -4.78940000 | 1.89922600  | 1.24470200  | H  | -2.54591300 | 1.32476900  | -2.01289900 |
| H    | -6.38537800 | 1.12580900  | 1.42144600  | C  | -0.50278600 | -0.35419700 | -1.68613600 |
| H    | -5.25181100 | 1.14688500  | 2.79831300  | C  | 0.48834000  | -1.28006000 | -1.78177400 |
|      |             |             |             | C  | 1.57769300  | -1.65966900 | -2.69382600 |
|      |             |             |             | C  | 0.65228200  | -2.71262600 | -2.06054900 |
| 14_S |             |             |             | H  | 2.60438400  | -1.65387900 | -2.34840600 |
| C    | 4.03360500  | -3.08083800 | 0.37356000  | H  | 1.44576300  | -1.40445800 | -3.74308000 |
| C    | 5.05999900  | -2.26788900 | -0.11702700 | H  | -0.11230200 | -3.19572200 | -2.66605500 |
| C    | 4.79277600  | -0.93748500 | -0.44181600 | H  | 1.11302400  | -3.34738500 | -1.31125000 |
| C    | 3.49778900  | -0.44078300 | -0.28220400 | H  | -0.28290000 | 0.65234200  | -2.03515600 |
| C    | 2.45476400  | -1.25445900 | 0.19055700  | C  | 0.46010000  | -1.17002600 | 2.48631800  |
| C    | 2.73534200  | -2.57643400 | 0.53282800  | O  | -0.10466300 | -1.66273000 | 1.45273700  |
| H    | 4.24334800  | -4.11533800 | 0.63467600  |    |             |             |             |

|      |             |             |             |       |             |             |             |
|------|-------------|-------------|-------------|-------|-------------|-------------|-------------|
| O    | 1.21426500  | -0.16053600 | 2.28695100  | C     | -2.43714700 | 0.06005300  | 2.26556000  |
| C    | 0.28714000  | -1.76151400 | 3.84860000  | C     | -1.13033600 | -0.41707200 | 2.35075000  |
| H    | 1.02313900  | -2.56391700 | 3.97429600  | C     | -0.74788400 | -1.62490000 | 1.74602400  |
| H    | 0.46237900  | -1.00876100 | 4.61915100  | C     | -1.73675800 | -2.34615200 | 1.05046700  |
| H    | -0.71117000 | -2.19212100 | 3.95142000  | H     | -3.79474100 | -2.43686100 | 0.40796400  |
| O    | -5.93665900 | -1.13495500 | -0.42670000 | H     | -2.69028400 | 0.99880200  | 2.74264800  |
| C    | -6.41074500 | -2.34477800 | 0.15476700  | H     | -0.39434500 | 0.16270700  | 2.89652400  |
| H    | -5.95069300 | -2.52893400 | 1.13341400  | H     | -1.46696600 | -3.27949900 | 0.56538200  |
| H    | -7.48637700 | -2.21453600 | 0.28341000  | C     | 0.62042600  | -2.15135300 | 1.80359100  |
| H    | -6.22733600 | -3.20526400 | -0.50005300 | C     | 1.65710200  | -1.58518300 | 2.41659700  |
| 14_T |             |             |             | C     | 3.08041500  | -1.64333400 | 2.75095400  |
| C    | 5.11040500  | 0.13765300  | 0.11119500  | C     | 2.19744500  | -0.46601000 | 3.19703100  |
| C    | 5.21724400  | -1.12776500 | -0.47708300 | H     | 3.80980800  | -1.45864500 | 1.96648700  |
| C    | 4.08803100  | -1.74938700 | -1.01143200 | H     | 3.41062700  | -2.34476000 | 3.51601300  |
| C    | 2.86264500  | -1.08519200 | -0.96051500 | H     | 1.94326900  | -0.38771500 | 4.25341600  |
| C    | 2.75213000  | 0.18294700  | -0.37648300 | H     | 2.34318500  | 0.49138000  | 2.69950600  |
| C    | 3.87625700  | 0.79875800  | 0.16762000  | H     | 0.78364200  | -3.09311400 | 1.28112200  |
| H    | 5.99216200  | 0.61208900  | 0.53345200  | C     | 1.55014500  | 3.21506000  | -0.23506700 |
| H    | 6.18074200  | -1.62735700 | -0.51217100 | O     | 1.22514700  | 2.43893100  | 0.74069600  |
| H    | 4.13930100  | -2.73412100 | -1.46653400 | O     | 1.56570100  | 2.74168500  | -1.40157200 |
| H    | 3.80467800  | 1.77184400  | 0.64252600  | C     | 1.92809000  | 4.64205100  | 0.05199500  |
| C    | 1.60130800  | -1.65951300 | -1.50033800 | H     | 3.00313000  | 4.68347800  | 0.26129000  |
| O    | 1.49149600  | -2.77478000 | -2.00405100 | H     | 1.72547500  | 5.27194200  | -0.81583800 |
| N    | 0.57779600  | -0.73870300 | -1.33826600 | H     | 1.39771600  | 5.01488700  | 0.93046800  |
| C    | -0.74214700 | -0.92097800 | -1.73749000 | O     | -4.69583400 | -0.27854900 | 1.38722400  |
| C    | -1.60498400 | 0.16065200  | -1.38367600 | C     | -5.13034000 | 0.88603200  | 2.07384000  |
| C    | -1.29389700 | -2.00473200 | -2.40981900 | H     | -4.57792000 | 1.77710700  | 1.75328200  |
| C    | -2.98920000 | 0.14611300  | -1.69835700 | H     | -6.18536200 | 1.01017700  | 1.82221400  |
| C    | -2.67420200 | -2.01767300 | -2.72048900 | H     | -5.03050000 | 0.77296800  | 3.16067800  |
| H    | -0.65844600 | -2.83533400 | -2.68002000 | TS9_S |             |             |             |
| C    | -1.76998000 | 2.23714500  | -0.33704900 | C     | 3.45442900  | -3.43312900 | 0.53011900  |
| C    | -3.75197100 | 1.26604200  | -1.29288600 | C     | 4.60592000  | -2.73182100 | 0.15836000  |
| C    | -3.51655600 | -0.98136400 | -2.37988400 | C     | 4.50204600  | -1.41657200 | -0.29828800 |
| H    | -3.07321600 | -2.88209200 | -3.24292100 | C     | 3.24784900  | -0.81701200 | -0.40002000 |
| C    | -3.14536900 | 2.30923100  | -0.62184700 | C     | 2.07874100  | -1.53189400 | -0.06570500 |
| H    | -1.25878700 | 3.02222200  | 0.20964900  | C     | 2.19499600  | -2.83757500 | 0.41539800  |
| H    | -4.81526900 | 1.29049800  | -1.51066900 | H     | 3.53617100  | -4.44950200 | 0.90570300  |
| H    | -4.57396400 | -1.01044600 | -2.62175200 | H     | 5.57984700  | -3.20546500 | 0.23793400  |
| H    | -3.70866700 | 3.18022600  | -0.30698200 | H     | 5.37971500  | -0.83340200 | -0.55985100 |
| N    | -1.03079300 | 1.20161900  | -0.70778500 | H     | 1.30495500  | -3.39326100 | 0.69359800  |
| Co   | 0.94788300  | 0.87163200  | -0.44800200 | C     | 3.10292600  | 0.62590300  | -0.75694100 |
| C    | -3.04108200 | -1.88454300 | 0.95761300  | O     | 4.01508700  | 1.31602100  | -1.22390800 |
| C    | -3.39965800 | -0.67044600 | 1.55822800  | N     | 1.84502600  | 1.04917400  | -0.42902600 |

|    |             |             |             |       |             |             |             |
|----|-------------|-------------|-------------|-------|-------------|-------------|-------------|
| C  | 1.41760200  | 2.36145900  | -0.40227400 | C     | -6.50682500 | -2.10658800 | -0.00277800 |
| C  | 0.15840700  | 2.52676500  | 0.25446000  | H     | -6.12931400 | -2.30472800 | 1.00833100  |
| C  | 2.04634500  | 3.49628200  | -0.90898000 | H     | -7.58306000 | -1.93188500 | 0.04548400  |
| C  | -0.45930300 | 3.79892400  | 0.38720900  | H     | -6.31256600 | -2.97983500 | -0.63796500 |
| C  | 1.42992400  | 4.76048200  | -0.77329600 |       |             |             |             |
| H  | 3.00582200  | 3.39107500  | -1.39513700 | TS9_T |             |             |             |
| C  | -1.58393900 | 1.45196700  | 1.37261700  | C     | 3.17596200  | -3.65343000 | 0.54715300  |
| C  | -1.70657300 | 3.83695500  | 1.06160900  | C     | 4.38176900  | -3.04536600 | 0.18398200  |
| C  | 0.20936900  | 4.92878600  | -0.14924600 | C     | 4.38962200  | -1.72351400 | -0.26746800 |
| H  | 1.94355300  | 5.62737800  | -1.17921600 | C     | 3.19365200  | -1.01459800 | -0.37311500 |
| C  | -2.26133000 | 2.67531300  | 1.55297900  | C     | 1.97228500  | -1.65162200 | -0.06820700 |
| H  | -1.99435600 | 0.51022500  | 1.71807800  | C     | 1.96897000  | -2.96081700 | 0.41445400  |
| H  | -2.21465700 | 4.78923500  | 1.18431400  | H     | 3.17227000  | -4.67194000 | 0.92551200  |
| H  | -0.24363700 | 5.91062700  | -0.05570200 | H     | 5.31433300  | -3.59455300 | 0.27268500  |
| H  | -3.21509000 | 2.67974000  | 2.06824000  | H     | 5.31566100  | -1.21202900 | -0.51294000 |
| N  | -0.41833200 | 1.39001300  | 0.74966100  | H     | 1.03132300  | -3.44102400 | 0.67657800  |
| Co | 0.65980800  | -0.20002300 | 0.35726800  | C     | 3.18982600  | 0.45000700  | -0.69387800 |
| C  | -4.07670800 | 0.30561700  | -1.26457700 | O     | 4.14660300  | 1.02977500  | -1.21857800 |
| C  | -4.59086000 | -0.88183200 | -0.72152700 | N     | 2.01143900  | 0.99787500  | -0.26730700 |
| C  | -3.71479800 | -1.92434600 | -0.39353800 | C     | 1.67804000  | 2.33696000  | -0.30626000 |
| C  | -2.34513500 | -1.77465700 | -0.60740200 | C     | 0.38891900  | 2.63565500  | 0.26001600  |
| C  | -1.81249500 | -0.59653500 | -1.15116600 | C     | 2.42536900  | 3.39773300  | -0.81285400 |
| C  | -2.71296200 | 0.43933700  | -1.47089000 | C     | -0.10845900 | 3.96777500  | 0.30752700  |
| H  | -4.76524700 | 1.10632500  | -1.51380200 | C     | 1.92259400  | 4.71755500  | -0.76273300 |
| H  | -4.08558500 | -2.84914400 | 0.03139300  | H     | 3.39731700  | 3.18827900  | -1.23756500 |
| H  | -1.67977000 | -2.57829800 | -0.32042400 | C     | -1.53359600 | 1.79382100  | 1.28650500  |
| H  | -2.32520600 | 1.36727300  | -1.88245900 | C     | -1.38554700 | 4.15904600  | 0.89203400  |
| C  | -0.37775100 | -0.37195400 | -1.37975700 | C     | 0.68970900  | 5.01527100  | -0.22116800 |
| C  | 0.59048200  | -1.39766600 | -1.50802000 | H     | 2.53667300  | 5.51802000  | -1.16563300 |
| C  | 1.35174300  | -1.77099200 | -2.72814700 | C     | -2.09316100 | 3.08297600  | 1.38397600  |
| C  | 0.40785700  | -2.76674600 | -2.05034400 | H     | -2.05609600 | 0.91083700  | 1.63890300  |
| H  | 2.41021600  | -1.99085800 | -2.65775200 | H     | -1.79555700 | 5.16372900  | 0.94712700  |
| H  | 1.04319300  | -1.29440700 | -3.65494400 | H     | 0.32004900  | 6.03528600  | -0.18710000 |
| H  | -0.55917000 | -2.97173200 | -2.50190500 | H     | -3.07101400 | 3.20786400  | 1.83522200  |
| H  | 0.87443200  | -3.61796400 | -1.57208800 | N     | -0.34333000 | 1.58643600  | 0.74608100  |
| H  | -0.15265700 | 0.55113300  | -1.90835300 | Co    | 0.63248500  | -0.19814100 | 0.49007200  |
| C  | 0.39850600  | -1.07522800 | 2.53671400  | C     | -4.00345000 | 0.50988700  | -1.26611000 |
| O  | -0.36151800 | -1.40015000 | 1.55492800  | C     | -4.59685900 | -0.67287400 | -0.79082000 |
| O  | 1.31531900  | -0.23241600 | 2.30911000  | C     | -3.79645000 | -1.79758100 | -0.53864200 |
| C  | 0.21929900  | -1.71141900 | 3.88265300  | C     | -2.42668900 | -1.73672900 | -0.76415600 |
| H  | 0.72318500  | -2.68479900 | 3.87738400  | C     | -1.81391700 | -0.56554400 | -1.24832000 |
| H  | 0.66699400  | -1.09315600 | 4.66246500  | C     | -2.63907000 | 0.55871300  | -1.48304200 |
| H  | -0.84050500 | -1.87947600 | 4.08793600  | H     | -4.63595100 | 1.37124600  | -1.45276300 |
| O  | -5.94082800 | -0.92342000 | -0.55103700 | H     | -4.23011700 | -2.71375600 | -0.15793300 |

H -1.81659000 -2.60007900 -0.53399600  
H -2.18621600 1.47815400 -1.84254700  
C -0.39288500 -0.45138400 -1.51344800  
C 0.52978800 -1.51336600 -1.60969300  
C 1.33820500 -1.91161000 -2.79137100  
C 0.32585600 -2.87268200 -2.16583800  
H 2.38577100 -2.15770500 -2.66079000  
H 1.09438700 -1.43221400 -3.73608000  
H -0.61768900 -3.05027400 -2.67587500  
H 0.73382800 -3.73591600 -1.65450500  
H -0.06627200 0.50818800 -1.90827800  
C 0.02425200 -1.21882200 2.66985700  
O -0.76874300 -1.37062600 1.68644500  
O 1.10254600 -0.56466300 2.51743400  
C -0.29067200 -1.85137600 4.00248800  
H 0.08059500 -2.88278700 3.99569600  
H 0.20580500 -1.31562900 4.81363300  
H -1.36974400 -1.88150800 4.16882300  
O -5.93943000 -0.62755500 -0.60534400  
C -6.59350500 -1.79970300 -0.12916700  
H -6.22700500 -2.09012500 0.86282000  
H -7.65217700 -1.54497900 -0.06064400  
H -6.46862500 -2.63921000 -0.82359500

15\_Q

C -1.79124700 4.28995600 -0.68066700  
C -0.94884800 4.24955900 -1.79336000  
C 0.22927900 3.51104900 -1.73653500  
C 0.55730700 2.76637600 -0.59724000  
C -0.29819200 2.78568900 0.52206700  
C -1.45486700 3.57497100 0.46688500  
H -2.69947300 4.88527800 -0.70123500  
H -1.19792700 4.80789700 -2.69079100  
H 0.91458200 3.50595800 -2.57825300  
H -2.09528500 3.62602800 1.34281700  
C 1.90473600 2.08093500 -0.56928600  
O 2.91880200 2.77978200 -0.68263700  
N 1.85146000 0.72574200 -0.42846000  
C 2.98777600 -0.05647900 -0.23843100  
C 2.75199000 -1.47368400 -0.14807800  
C 4.30606800 0.37688000 -0.09907800  
C 3.81695200 -2.39281900 0.08232400  
C 5.35518300 -0.54094400 0.13059900

H 4.51163200 1.43367300 -0.17797600  
C 1.18024700 -3.20452200 -0.22175200  
C 3.48188000 -3.76700200 0.15667500  
C 5.13757200 -1.89798800 0.22269200  
H 6.36395100 -0.15098600 0.23323400  
C 2.17351300 -4.17513300 0.00654100  
H 0.13625400 -3.46541200 -0.35728700  
H 4.27215100 -4.49203800 0.33084600  
H 5.95270200 -2.59344100 0.39622500  
H 1.89822500 -5.22259300 0.05720500  
N 1.46624100 -1.91207400 -0.29244200  
Co 0.15916300 -0.34195500 -0.58853100  
C -2.70614700 -2.25062800 1.64851100  
C -3.79869800 -1.66723000 0.97524600  
C -3.73614600 -0.31696100 0.59962500  
C -2.60282400 0.43485000 0.87181600  
C -1.46860700 -0.13064800 1.52661100  
C -1.57837300 -1.51061500 1.90899400  
H -2.77565400 -3.29301700 1.94174000  
H -4.56773900 0.15585400 0.09156600  
H -2.57577400 1.46749700 0.55637200  
H -0.73825200 -1.97208000 2.42037000  
C -0.26804900 0.56193900 1.85094500  
C 0.04675500 2.01478700 1.77418100  
C 1.31435500 2.43767900 2.49312800  
C -0.01113400 2.77746600 3.10484700  
H 1.89261200 3.23619700 2.04145400  
H 1.91094300 1.65195900 2.94770300  
H -0.33648200 2.22342800 3.97949800  
H -0.34200600 3.81081400 3.07078400  
H 0.46002100 -0.02644800 2.40644600  
C -1.69424500 -0.89783300 -2.10814800  
O -1.38693200 -1.77154700 -1.25075300  
O -1.01759500 0.18971900 -2.16323900  
C -2.84235400 -1.09881700 -3.06159700  
H -3.57425500 -0.29793300 -2.91773800  
H -2.48283900 -1.02760600 -4.09279000  
H -3.31679600 -2.06779700 -2.90172400  
O -4.85425200 -2.48640800 0.74126000  
C -5.97494500 -1.95423600 0.04380400  
H -5.69551300 -1.60547300 -0.95773300  
H -6.68928700 -2.77393600 -0.04757300  
H -6.44091700 -1.13064400 0.59852500

## 15\_S

|    |             |             |             |
|----|-------------|-------------|-------------|
| C  | 0.89020900  | -4.29466100 | 0.70344100  |
| C  | 2.24973400  | -4.09276100 | 0.97199400  |
| C  | 2.91268100  | -3.00396500 | 0.41889000  |
| C  | 2.22860700  | -2.09952600 | -0.40277500 |
| C  | 0.86132200  | -2.31806700 | -0.72579400 |
| C  | 0.21507100  | -3.42787400 | -0.14689700 |
| H  | 0.36838900  | -5.14078900 | 1.14020300  |
| H  | 2.78365800  | -4.77990700 | 1.62141500  |
| H  | 3.96034000  | -2.82121100 | 0.63380400  |
| H  | -0.82434400 | -3.61462900 | -0.39551400 |
| C  | 2.93309700  | -0.82202900 | -0.80469000 |
| O  | 4.05326400  | -0.78103300 | -1.31646600 |
| N  | 2.15450500  | 0.21415300  | -0.40956000 |
| C  | 2.43592400  | 1.56163300  | -0.44670600 |
| C  | 1.43453300  | 2.33252700  | 0.21719900  |
| C  | 3.51606800  | 2.22764900  | -1.01430500 |
| C  | 1.50339900  | 3.74621300  | 0.29980900  |
| C  | 3.58588800  | 3.63743700  | -0.92960500 |
| H  | 4.28972600  | 1.65487900  | -1.50800100 |
| C  | -0.57673800 | 2.25366900  | 1.40972600  |
| C  | 0.44706100  | 4.39726200  | 0.98700700  |
| C  | 2.61645100  | 4.39292300  | -0.29790800 |
| H  | 4.43791600  | 4.13764500  | -1.38072000 |
| C  | -0.57826100 | 3.65771200  | 1.53782400  |
| H  | -1.36796600 | 1.63054300  | 1.80810400  |
| H  | 0.45672500  | 5.47983200  | 1.07419500  |
| H  | 2.69531900  | 5.47393100  | -0.24491000 |
| H  | -1.39558100 | 4.13514900  | 2.06604400  |
| N  | 0.40000500  | 1.62519100  | 0.77193600  |
| Co | 0.55491100  | -0.23060000 | 0.47573800  |
| C  | -3.71591000 | 1.61519700  | -0.93637400 |
| C  | -4.58222200 | 0.56641400  | -0.59476000 |
| C  | -4.07534800 | -0.73416300 | -0.48599600 |
| C  | -2.71862300 | -0.96940800 | -0.70628300 |
| C  | -1.83199800 | 0.06224500  | -1.04488500 |
| C  | -2.37074900 | 1.35957000  | -1.15927100 |
| H  | -4.12252100 | 2.61713900  | -1.03056800 |
| H  | -4.72240600 | -1.56364700 | -0.22735400 |
| H  | -2.34256900 | -1.97993300 | -0.60394400 |
| H  | -1.71290200 | 2.18075700  | -1.43137800 |
| C  | -0.37857900 | -0.13766900 | -1.23634600 |
| C  | 0.14784400  | -1.46292900 | -1.76818800 |
| C  | 0.72981600  | -1.48193200 | -3.16374200 |

|   |             |             |             |
|---|-------------|-------------|-------------|
| C | -0.57683000 | -2.17878800 | -2.88677700 |
| H | 1.60890100  | -2.09408900 | -3.34029100 |
| H | 0.70947000  | -0.54900000 | -3.71924600 |
| H | -1.49257400 | -1.72391100 | -3.24937400 |
| H | -0.58141700 | -3.26473800 | -2.88342200 |
| H | 0.05278100  | 0.70386000  | -1.78040500 |
| C | -0.03435300 | -1.06198500 | 2.64405100  |
| O | -0.86794500 | -0.81613500 | 1.69378100  |
| O | 1.18586100  | -0.80011400 | 2.45890700  |
| C | -0.53247300 | -1.68709300 | 3.91725800  |
| H | -0.64767100 | -2.76466300 | 3.75460100  |
| H | 0.18081500  | -1.53017800 | 4.72797500  |
| H | -1.51142100 | -1.28198800 | 4.18462700  |
| O | -5.88738900 | 0.90960700  | -0.39712700 |
| C | -6.80043400 | -0.12369500 | -0.05717300 |
| H | -6.52842600 | -0.61118200 | 0.88774900  |
| H | -7.77357500 | 0.35755700  | 0.05688500  |
| H | -6.86628800 | -0.88268000 | -0.84713000 |

## 15\_T

|   |             |             |             |
|---|-------------|-------------|-------------|
| C | 1.34055000  | 4.32563200  | 0.59425500  |
| C | 0.14773600  | 4.49154800  | 1.29993900  |
| C | -0.96528000 | 3.72636300  | 0.95980800  |
| C | -0.88994000 | 2.76334200  | -0.05321800 |
| C | 0.31582900  | 2.58390800  | -0.76412200 |
| C | 1.41221100  | 3.38975800  | -0.43585000 |
| H | 2.20940600  | 4.93025000  | 0.83709500  |
| H | 0.08010200  | 5.22371600  | 2.09906500  |
| H | -1.90840700 | 3.86331300  | 1.47905500  |
| H | 2.33101900  | 3.28818500  | -1.00505900 |
| C | -2.14200300 | 1.96629000  | -0.35096300 |
| O | -3.19149600 | 2.54497300  | -0.65018400 |
| N | -1.95829500 | 0.62991100  | -0.17131000 |
| C | -2.94616300 | -0.33254300 | -0.29699600 |
| C | -2.53547900 | -1.67207500 | 0.03649200  |
| C | -4.26520900 | -0.14104400 | -0.70333900 |
| C | -3.45449800 | -2.75973800 | -0.03249400 |
| C | -5.16315800 | -1.22828400 | -0.77651500 |
| H | -4.58743300 | 0.86034100  | -0.94920600 |
| C | -0.82163800 | -3.07128000 | 0.77255700  |
| C | -2.97205100 | -4.04065500 | 0.33332300  |
| C | -4.78605500 | -2.51344600 | -0.45189200 |
| H | -6.18290700 | -1.03298900 | -1.09604400 |
| C | -1.66510500 | -4.19904000 | 0.73901700  |



|        |             |             |             |    |             |             |             |
|--------|-------------|-------------|-------------|----|-------------|-------------|-------------|
| H      | 0.21627700  | -3.15497100 | 1.08019400  | C  | -2.23312600 | 3.07114100  | 1.08466600  |
| H      | -3.64840200 | -4.89002300 | 0.29350100  | H  | -3.60790800 | 4.57865100  | 0.41806600  |
| H      | -5.48803500 | -3.33958000 | -0.50680500 | H  | -2.11246400 | 5.32183500  | -1.45002300 |
| H      | -1.27567300 | -5.16796100 | 1.03084000  | H  | 0.10739200  | 4.25754600  | -1.71354500 |
| N      | -1.23993900 | -1.86263900 | 0.42972700  | H  | -2.87989500 | 2.73837100  | 1.89028100  |
| Co     | -0.23944500 | -0.03376500 | 0.49730700  | C  | 1.27182600  | 2.40478800  | -0.43798500 |
| C      | 3.02012700  | -2.63786400 | -0.92594800 | O  | 2.08646200  | 3.31285800  | -0.65055500 |
| C      | 4.17165700  | -1.92106000 | -0.55056500 | N  | 1.54840100  | 1.06915400  | -0.51283400 |
| C      | 4.13006900  | -0.51823100 | -0.49687600 | C  | 2.83046000  | 0.67132900  | -0.93089100 |
| C      | 2.95289300  | 0.15033200  | -0.80038100 | C  | 3.31988100  | -0.57417700 | -0.41349100 |
| C      | 1.78404900  | -0.54429400 | -1.17954600 | C  | 3.65221300  | 1.35164100  | -1.82532500 |
| C      | 1.85612100  | -1.96121000 | -1.23374200 | C  | 4.60445900  | -1.07795900 | -0.77868800 |
| H      | 3.07516300  | -3.72031700 | -0.97563300 | C  | 4.91459200  | 0.84149000  | -2.19795800 |
| H      | 5.00513300  | 0.05154100  | -0.21022600 | H  | 3.32111100  | 2.29679400  | -2.22810800 |
| H      | 2.92658000  | 1.22916200  | -0.72959200 | C  | 2.91541900  | -2.41194000 | 0.96760100  |
| H      | 0.97278800  | -2.51893000 | -1.52970700 | C  | 5.01110400  | -2.30258600 | -0.19507600 |
| C      | 0.52166900  | 0.10985700  | -1.46438300 | C  | 5.40119200  | -0.34244900 | -1.68921400 |
| C      | 0.40225500  | 1.55952800  | -1.87236300 | H  | 5.51317900  | 1.41190600  | -2.90226200 |
| C      | -0.42665000 | 1.82641400  | -3.10883800 | C  | 4.17810500  | -2.96510800 | 0.67971900  |
| C      | 1.07147200  | 1.96207900  | -3.17537300 | H  | 2.20494100  | -2.90973600 | 1.61887200  |
| H      | -1.02492200 | 2.73143200  | -3.12275100 | H  | 5.98611000  | -2.70884300 | -0.44972200 |
| H      | -0.88882900 | 0.97132200  | -3.59382700 | H  | 6.37903800  | -0.72095100 | -1.97006700 |
| H      | 1.63509100  | 1.19744300  | -3.70050500 | H  | 4.46928200  | -3.90354200 | 1.13816200  |
| H      | 1.49110300  | 2.96074900  | -3.24372600 | N  | 2.51059600  | -1.26523600 | 0.44288200  |
| H      | -0.19720500 | -0.54052600 | -1.96190200 | Co | 0.59482900  | -0.43556900 | 0.39788300  |
| C      | 0.50261200  | 0.49379700  | 2.79443100  | C  | -4.28245500 | -1.99118300 | 0.35573800  |
| O      | 1.24638500  | 0.40249800  | 1.74179400  | C  | -4.44012300 | -1.44802800 | -0.93102700 |
| O      | -0.71207800 | 0.19064900  | 2.72091500  | C  | -3.67376600 | -0.33526600 | -1.30337400 |
| C      | 1.12730700  | 1.00796200  | 4.06507600  | C  | -2.76852000 | 0.22288300  | -0.40845900 |
| H      | 1.30161000  | 2.08408800  | 3.95528100  | C  | -2.58915000 | -0.30307400 | 0.89220900  |
| H      | 0.46960100  | 0.83840200  | 4.91869700  | C  | -3.37824700 | -1.43164700 | 1.23785400  |
| H      | 2.09703500  | 0.53129600  | 4.23188600  | H  | -4.87805300 | -2.85483500 | 0.63304100  |
| O      | 5.26513600  | -2.66777200 | -0.26826400 | H  | -3.76593600 | 0.09808600  | -2.29158500 |
| C      | 6.45447600  | -1.99682700 | 0.13990300  | H  | -2.18194600 | 1.06740700  | -0.74124600 |
| H      | 6.29587800  | -1.42838500 | 1.06387900  | H  | -3.25577700 | -1.87135300 | 2.22330400  |
| H      | 7.19233400  | -2.77974500 | 0.32039300  | C  | -1.65842700 | 0.17228000  | 1.88466900  |
| H      | 6.82495500  | -1.32516100 | -0.64358300 | C  | -0.80080000 | 1.29416700  | 1.88806400  |
|        |             |             |             | C  | 1.04317600  | 0.96663400  | 2.57747400  |
|        |             |             |             | C  | -0.11350300 | 1.65838900  | 3.18524400  |
| TS10_Q |             |             |             | H  | 1.82970300  | 1.53114600  | 2.09549900  |
| C      | -2.64542400 | 4.10326400  | 0.25473600  | H  | 1.23918000  | -0.06320100 | 2.85334800  |
| C      | -1.81040100 | 4.51869000  | -0.78478600 | H  | -0.54607300 | 1.18361800  | 4.06699400  |
| C      | -0.57414000 | 3.91093900  | -0.94563300 | H  | 0.00169500  | 2.73227500  | 3.32702100  |
| C      | -0.14566400 | 2.84627200  | -0.12660200 | H  | -1.61753500 | -0.43676000 | 2.78323500  |
| C      | -1.00190500 | 2.40699000  | 0.90031300  |    |             |             |             |

C -0.49556500 -2.65314300 0.36232900  
O -0.08361200 -2.25493300 1.49134600  
O -0.35870200 -1.89606000 -0.65984100  
C -1.10746300 -4.01870400 0.19049300  
H -1.91228500 -3.98194400 -0.54585400  
H -0.33862800 -4.70593300 -0.18188100  
H -1.48223400 -4.39785400 1.14242500  
O -5.34817900 -2.06648800 -1.73089000  
C -5.51956800 -1.57151200 -3.05380400  
H -6.27294800 -2.20972100 -3.51858200  
H -5.87753800 -0.53454100 -3.05327400  
H -4.58861700 -1.63320900 -3.63051100

TS10\_S

C -2.10910900 4.17044400 0.53454200  
C -1.26412600 4.64809000 -0.46487100  
C -0.10885000 3.94244900 -0.77788900  
C 0.23797100 2.73354900 -0.14993000  
C -0.64396000 2.23822000 0.84592900  
C -1.78273100 2.98597600 1.18661400  
H -3.00874300 4.71188800 0.81137400  
H -1.49503700 5.56968500 -0.99047900  
H 0.57433400 4.31846300 -1.52934100  
H -2.42881700 2.61205800 1.97569700  
C 1.58320400 2.18765800 -0.64102100  
O 2.37973500 2.99522800 -1.14056400  
N 1.85426500 0.85809700 -0.51878600  
C 3.10603000 0.30801100 -0.72935600  
C 3.24163100 -0.98712900 -0.13845700  
C 4.21121000 0.82888800 -1.40187300  
C 4.43687400 -1.74988900 -0.24063800  
C 5.39959100 0.07152100 -1.49886900  
H 4.14150400 1.81077000 -1.84441900  
C 2.17587200 -2.65154400 1.10849500  
C 4.43976300 -3.02502900 0.37892700  
C 5.52998300 -1.18692900 -0.94493300  
H 6.23814400 0.50427500 -2.03712000  
C 3.31891900 -3.47316000 1.04456700  
H 1.27072400 -2.97016500 1.61409800  
H 5.33200600 -3.64159500 0.31985200  
H 6.45275200 -1.75050600 -1.03772100  
H 3.29685200 -4.44688700 1.52047500  
N 2.15206700 -1.45478300 0.54264500  
Co 0.63962700 -0.29934200 0.37081400

C -3.99037700 -2.45484200 0.65377300  
C -4.79525900 -1.62667000 -0.14148500  
C -4.39420800 -0.30526300 -0.37138800  
C -3.20714200 0.17435100 0.18134900  
C -2.38945200 -0.63356200 0.98669700  
C -2.81784400 -1.96038500 1.20319500  
H -4.30365600 -3.47925800 0.82678200  
H -4.99053900 0.35905600 -0.98497300  
H -2.91089200 1.18803500 -0.04222600  
H -2.20428600 -2.61701900 1.81459600  
C -1.13248700 -0.22878800 1.63644600  
C -0.46410100 1.02788700 1.72619400  
C 1.41905300 0.63281800 2.16343700  
C 0.34890800 1.30712600 2.96024200  
H 2.23097900 1.25401800 1.80760200  
H 1.72068700 -0.32871500 2.56345800  
H 0.01409900 0.78049800 3.85326200  
H 0.49972400 2.36677800 3.15357800  
H -0.91240300 -0.85893600 2.49874500  
C -0.78451500 -0.88865100 -1.55630500  
O -0.07961300 -1.69979900 -0.85980100  
O -0.75668700 0.33620800 -1.26408100  
C -1.65351800 -1.42268600 -2.66009400  
H -2.54889000 -1.86696400 -2.21259500  
H -1.95760400 -0.61886300 -3.33253400  
H -1.12841400 -2.20389000 -3.21569100  
O -5.93219900 -2.19142600 -0.63781200  
C -6.76242600 -1.38961900 -1.46627000  
H -7.60043500 -2.02434300 -1.75997700  
H -7.14706600 -0.51369300 -0.92860600  
H -6.23257700 -1.05438800 -2.36693100

TS10\_T

C 3.54742300 3.53096000 -1.00353300  
C 3.04399000 4.12560900 0.15424600  
C 1.81002100 3.72445500 0.64744200  
C 1.04958000 2.70775600 0.03799700  
C 1.56238000 2.11282100 -1.12896000  
C 2.79978500 2.54767100 -1.63805900  
H 4.50722800 3.83223200 -1.41198700  
H 3.60627900 4.90147300 0.66497700  
H 1.38834000 4.18967900 1.52969000  
H 3.17904600 2.08543600 -2.54483900  
C -0.25320000 2.41206500 0.76030600

|    |             |             |             |      |             |             |             |
|----|-------------|-------------|-------------|------|-------------|-------------|-------------|
| O  | -0.71199600 | 3.32563600  | 1.46254400  | H    | -1.03145700 | -4.54070300 | -2.30053200 |
| N  | -0.81274800 | 1.17406500  | 0.63351500  | O    | 4.50003100  | -3.05813500 | 2.09446600  |
| C  | -1.96624800 | 0.92340500  | 1.39901800  | C    | 4.93262200  | -2.45117900 | 3.30765500  |
| C  | -3.00958200 | 0.18073300  | 0.76197300  | H    | 5.50815000  | -3.21315400 | 3.83556100  |
| C  | -2.17408500 | 1.31660200  | 2.71567200  | H    | 5.57471000  | -1.58271200 | 3.11658500  |
| C  | -4.23441500 | -0.10774400 | 1.43522700  | H    | 4.08251800  | -2.14561200 | 3.92912000  |
| C  | -3.37472100 | 1.00833100  | 3.39051900  |      |             |             |             |
| H  | -1.40846300 | 1.88593600  | 3.22333300  |      |             |             |             |
| C  | -3.72219300 | -0.90847200 | -1.16577100 | 16_Q |             |             |             |
| C  | -5.22183400 | -0.81644700 | 0.70678700  | C    | -2.31687700 | 4.04083200  | 0.30682300  |
| C  | -4.39909400 | 0.32176000  | 2.77418200  | C    | -1.54788800 | 4.51502000  | -0.75832600 |
| H  | -3.48888600 | 1.33512500  | 4.42011400  | C    | -1.87590800 | 2.94044000  | 1.03112700  |
| C  | -4.97610000 | -1.20421300 | -0.59133900 | H    | -3.25339300 | 4.52314200  | 0.57045000  |
| H  | -3.46318300 | -1.25138200 | -2.16228500 | C    | -0.33447300 | 3.90604400  | -1.05089200 |
| H  | -6.16806900 | -1.04840100 | 1.18791100  | H    | -1.88261400 | 5.36698300  | -1.34241000 |
| H  | -5.32672400 | 0.10401500  | 3.29454100  | C    | -0.67391400 | 2.28195900  | 0.71400000  |
| H  | -5.71621700 | -1.74534900 | -1.17054800 | H    | -2.47370700 | 2.55848500  | 1.85202800  |
| N  | -2.78210900 | -0.24609700 | -0.51298500 | C    | 0.13010600  | 2.79382400  | -0.32823200 |
| Co | -0.69216200 | -0.16661100 | -0.88735100 | H    | 0.30257200  | 4.29173400  | -1.83793700 |
| C  | 3.31288000  | -2.97482700 | 0.07777600  | C    | -0.31965500 | 1.10292200  | 1.55983800  |
| C  | 3.74116000  | -2.32113900 | 1.24561600  | C    | 1.53210400  | 2.34165000  | -0.69177900 |
| C  | 3.37149300  | -0.98635700 | 1.46135100  | C    | -1.13955400 | 0.01719800  | 1.68837600  |
| C  | 2.59060400  | -0.31737100 | 0.52519900  | C    | 0.84503000  | 1.31158200  | 2.52907400  |
| C  | 2.15370700  | -0.95026800 | -0.65516200 | O    | 2.28376400  | 3.19838600  | -1.17620000 |
| C  | 2.53364100  | -2.30199800 | -0.84296600 | N    | 1.86400000  | 1.03889400  | -0.44297400 |
| H  | 3.60059500  | -4.00951700 | -0.07588500 | C    | -2.43460900 | -0.30390500 | 1.06661300  |
| H  | 3.68127200  | -0.46096900 | 2.35620600  | H    | -0.84095300 | -0.69773800 | 2.45313400  |
| H  | 2.31088600  | 0.70469700  | 0.73128900  | C    | 1.38255000  | 0.09664300  | 3.19826400  |
| H  | 2.19688700  | -2.82217400 | -1.73519100 | H    | 0.49868100  | 2.03548300  | 3.28063800  |
| C  | 1.30682900  | -0.36620600 | -1.68201800 | H    | 1.64938700  | 1.82775400  | 1.98426900  |
| C  | 0.97670800  | 0.99907000  | -1.94046700 | C    | 3.18783800  | 0.59503900  | -0.53474800 |
| C  | -0.79717000 | 1.27635500  | -2.53292300 | C    | -2.93043700 | 0.24399800  | -0.12779900 |
| C  | 0.47161200  | 1.39220600  | -3.30200400 | C    | -3.22868200 | -1.27400100 | 1.71087700  |
| H  | -1.22640000 | 2.17446600  | -2.10483100 | H    | 1.63901800  | -0.78551600 | 2.62055900  |
| H  | -1.49805000 | 0.51658700  | -2.87256300 | H    | 1.69789700  | 0.13278500  | 4.23500600  |
| H  | 0.61350500  | 0.64470300  | -4.08028900 | C    | 3.40364100  | -0.79494500 | -0.22325700 |
| H  | 0.76477600  | 2.38990700  | -3.61941500 | C    | 4.31969900  | 1.34785000  | -0.85228100 |
| H  | 1.10547700  | -1.03546100 | -2.51289800 | C    | -4.17015600 | -0.12958200 | -0.64192900 |
| C  | -0.96182300 | -2.65258400 | -1.25997900 | H    | -2.34220000 | 0.95786400  | -0.68652700 |
| O  | -1.07235200 | -1.96239100 | -2.31618600 | C    | -4.46821500 | -1.64873800 | 1.21847000  |
| O  | -0.70122900 | -2.09744000 | -0.14215700 | H    | -2.85649300 | -1.74029800 | 2.61856400  |
| C  | -1.17355100 | -4.14771800 | -1.29211200 | C    | 4.71060500  | -1.36661000 | -0.22763300 |
| H  | -0.49750800 | -4.64272600 | -0.59117300 | N    | 2.31063200  | -1.55776000 | 0.07731700  |
| H  | -2.20049100 | -4.36440600 | -0.97552400 | C    | 5.61010200  | 0.77358800  | -0.85227500 |
|    |             |             |             | H    | 4.19282600  | 2.38776500  | -1.10657600 |

|      |             |             |             |    |             |             |             |
|------|-------------|-------------|-------------|----|-------------|-------------|-------------|
| C    | -4.95389500 | -1.07412000 | 0.03433000  | C  | 5.44505100  | 1.14376700  | -1.02295500 |
| H    | -4.50747400 | 0.31413100  | -1.57035000 | H  | 3.94393100  | 2.68909100  | -0.91968800 |
| H    | -5.07485400 | -2.39115500 | 1.72613300  | C  | 2.62450100  | -2.73360400 | 0.21086400  |
| C    | 4.82246200  | -2.74029300 | 0.09639900  | C  | 4.93706800  | -2.50187200 | -0.40686600 |
| C    | 5.82348700  | -0.55152700 | -0.54924700 | C  | 5.75715600  | -0.19554400 | -0.92420100 |
| C    | 2.44310800  | -2.84523200 | 0.36789700  | H  | 6.22077400  | 1.85633400  | -1.28834200 |
| H    | 6.45289700  | 1.41061400  | -1.10519900 | C  | 3.88733500  | -3.30827100 | -0.02775800 |
| O    | -6.17622000 | -1.50198700 | -0.37858500 | H  | 1.77499500  | -3.32153200 | 0.53277700  |
| C    | 3.69824200  | -3.47958400 | 0.39387000  | H  | 5.92452600  | -2.91886600 | -0.58256400 |
| H    | 5.80713400  | -3.19937000 | 0.10323700  | H  | 6.76203600  | -0.56052900 | -1.11072000 |
| H    | 6.81904900  | -0.98394600 | -0.55421100 | H  | 4.01259700  | -4.37708900 | 0.10343800  |
| H    | 1.52085000  | -3.37715200 | 0.57296000  | N  | 2.41336400  | -1.43254900 | 0.06078300  |
| C    | -6.69282900 | -0.97543200 | -1.59501400 | Co | 0.82294000  | -0.48886400 | 0.50208800  |
| H    | 3.76139200  | -4.53331400 | 0.64108700  | C  | -4.62129800 | -1.73855300 | 0.88515200  |
| H    | -7.66388800 | -1.45168900 | -1.74043500 | C  | -4.96049300 | -1.18826900 | -0.36090400 |
| H    | -6.82995500 | 0.11142200  | -1.53903900 | C  | -4.10552300 | -0.24904600 | -0.95706900 |
| H    | -6.04325200 | -1.21468200 | -2.44607800 | C  | -2.94286400 | 0.14603400  | -0.30377900 |
| Co   | 0.57952600  | -0.46875700 | -0.14241700 | C  | -2.59490000 | -0.37922400 | 0.95281900  |
| O    | -0.57708100 | -1.10385300 | -1.65360300 | C  | -3.45196500 | -1.34649400 | 1.51647000  |
| C    | -0.96680400 | -2.17418800 | -1.05630200 | H  | -5.28292600 | -2.47510800 | 1.32838400  |
| O    | -0.52874200 | -2.43332900 | 0.09635200  | H  | -4.33070300 | 0.17131800  | -1.92916300 |
| C    | -1.97662400 | -3.06619200 | -1.72570900 | H  | -2.28801400 | 0.85109600  | -0.79632700 |
| H    | -2.97273800 | -2.77068900 | -1.37921600 | H  | -3.18729400 | -1.79357600 | 2.47048900  |
| H    | -1.94005700 | -2.95531600 | -2.81093400 | C  | -1.37342600 | -0.05089700 | 1.68888300  |
| H    | -1.81422200 | -4.10795100 | -1.44122500 | C  | -0.53779000 | 1.02953500  | 1.60468600  |
|      |             |             |             | C  | 1.47473200  | -0.16208500 | 2.28835600  |
|      |             |             |             | C  | 0.65675200  | 1.09111200  | 2.57214200  |
| 16_S |             |             |             | H  | 2.55445100  | -0.00887300 | 2.32110800  |
| C    | -2.56151800 | 3.97304700  | 0.43772000  | H  | 1.19449600  | -1.02933800 | 2.89466500  |
| C    | -1.81010400 | 4.45769800  | -0.63464200 | H  | 0.29935600  | 1.17380100  | 3.60817700  |
| C    | -0.60215700 | 3.85141100  | -0.95575000 | H  | 1.23895100  | 1.98678100  | 2.35182200  |
| C    | -0.11916600 | 2.74011800  | -0.24344600 | H  | -1.13697900 | -0.77676700 | 2.46228000  |
| C    | -0.90043500 | 2.22637500  | 0.80622300  | C  | -0.57673400 | -2.14704900 | -0.53301500 |
| C    | -2.10482900 | 2.86744200  | 1.14504200  | O  | -0.14031300 | -2.21117500 | 0.67863400  |
| H    | -3.49774100 | 4.44721500  | 0.71704800  | O  | -0.24404000 | -1.15282200 | -1.23384900 |
| H    | -2.15670700 | 5.31253000  | -1.20760100 | C  | -1.48795300 | -3.22127800 | -1.05175200 |
| H    | 0.01465600  | 4.23029000  | -1.76115100 | H  | -2.52050500 | -2.94433200 | -0.81412900 |
| H    | -2.69072900 | 2.46907300  | 1.96693200  | H  | -1.39376300 | -3.30738300 | -2.13591600 |
| C    | 1.25619300  | 2.26933700  | -0.65768600 | H  | -1.27218100 | -4.17836500 | -0.57182100 |
| O    | 1.89153000  | 3.01987800  | -1.41311400 | O  | -6.11892900 | -1.63182000 | -0.91017900 |
| N    | 1.75923400  | 1.08580800  | -0.17970500 | C  | -6.50124400 | -1.11650200 | -2.18152300 |
| C    | 3.09712000  | 0.77505800  | -0.45663800 | H  | -7.44776600 | -1.60004400 | -2.42833300 |
| C    | 3.42720300  | -0.60548400 | -0.32588900 | H  | -6.64910500 | -0.03041200 | -2.14784100 |
| C    | 4.14109700  | 1.63635800  | -0.80201800 | H  | -5.76080900 | -1.35875500 | -2.95340300 |
| C    | 4.73834200  | -1.10854200 | -0.56346200 |    |             |             |             |

## 16\_T

|    |             |             |             |
|----|-------------|-------------|-------------|
| C  | -2.50997800 | 3.98615600  | 0.24885900  |
| C  | -1.71312300 | 4.42351500  | -0.81009400 |
| C  | -0.49575800 | 3.80130600  | -1.05012200 |
| C  | -0.03975700 | 2.71475800  | -0.28010500 |
| C  | -0.87476100 | 2.23820600  | 0.75722700  |
| C  | -2.08658700 | 2.90897000  | 1.01499600  |
| H  | -3.45285400 | 4.47550200  | 0.47438400  |
| H  | -2.02889200 | 5.25520400  | -1.43271200 |
| H  | 0.15578400  | 4.15361300  | -1.83974000 |
| H  | -2.70588600 | 2.55099500  | 1.83028800  |
| C  | 1.36601900  | 2.26467200  | -0.64677300 |
| O  | 2.03810200  | 3.05476300  | -1.32215500 |
| N  | 1.83206100  | 1.04378600  | -0.22497700 |
| C  | 3.19209600  | 0.72966500  | -0.38363000 |
| C  | 3.54516600  | -0.66284400 | -0.30017800 |
| C  | 4.24445700  | 1.62701900  | -0.56764000 |
| C  | 4.89340600  | -1.10536900 | -0.44712100 |
| C  | 5.57931100  | 1.18513000  | -0.69423700 |
| H  | 4.02884100  | 2.68082400  | -0.64106600 |
| C  | 2.79165400  | -2.85116500 | 0.01834900  |
| C  | 5.13169900  | -2.50006000 | -0.36934100 |
| C  | 5.91675400  | -0.14906200 | -0.65225800 |
| H  | 6.35381500  | 1.93259400  | -0.84013400 |
| C  | 4.08954400  | -3.37307800 | -0.14718100 |
| H  | 1.93555900  | -3.48518300 | 0.22471000  |
| H  | 6.14812800  | -2.86640600 | -0.48377200 |
| H  | 6.94367900  | -0.48036000 | -0.77047100 |
| H  | 4.25062300  | -4.44346400 | -0.08432500 |
| N  | 2.54381600  | -1.55402600 | -0.05605700 |
| Co | 0.79797400  | -0.54484200 | 0.34711800  |
| C  | -4.76727100 | -1.60802000 | 1.04479500  |
| C  | -5.08876500 | -1.11706100 | -0.22988200 |
| C  | -4.21046900 | -0.22937200 | -0.86746800 |
| C  | -3.04018200 | 0.17081200  | -0.22954300 |
| C  | -2.70818600 | -0.29418000 | 1.05466700  |
| C  | -3.59307700 | -1.20777500 | 1.66301000  |
| H  | -5.44707100 | -2.30555100 | 1.52258200  |
| H  | -4.42005200 | 0.14473600  | -1.86182600 |
| H  | -2.36662500 | 0.83145400  | -0.75658100 |
| H  | -3.34638800 | -1.60847200 | 2.64244500  |
| C  | -1.47520100 | 0.03753600  | 1.77343600  |
| C  | -0.59708600 | 1.06982300  | 1.63395400  |

|   |             |             |             |
|---|-------------|-------------|-------------|
| C | 1.43284000  | -0.19445500 | 2.25532700  |
| C | 0.65291900  | 1.07389700  | 2.53185800  |
| H | 2.51769100  | -0.12256200 | 2.26233800  |
| H | 1.06448900  | -1.10135200 | 2.73925100  |
| H | 0.35125200  | 1.14781800  | 3.58652700  |
| H | 1.26130400  | 1.94849700  | 2.30002300  |
| H | -1.24138300 | -0.67998500 | 2.55770300  |
| C | -0.75257700 | -2.16012200 | -0.61501900 |
| O | -0.24702000 | -2.38047600 | 0.53546800  |
| O | -0.40577900 | -1.10920400 | -1.24401600 |
| C | -1.76641500 | -3.10774000 | -1.19235500 |
| H | -2.71762100 | -2.95963900 | -0.67078800 |
| H | -1.91275100 | -2.92004900 | -2.25690400 |
| H | -1.45276300 | -4.14206900 | -1.02837500 |
| O | -6.25518500 | -1.56484200 | -0.76310300 |
| C | -6.61126800 | -1.11802200 | -2.06645800 |
| H | -7.56669500 | -1.59273800 | -2.29602500 |
| H | -6.73320000 | -0.02855600 | -2.10058000 |
| H | -5.86879100 | -1.42320000 | -2.81390400 |

## TS11\_Q

|   |             |             |             |
|---|-------------|-------------|-------------|
| C | 1.19026800  | 4.44487300  | 0.84860800  |
| C | -0.13704700 | 4.63314100  | 1.25691800  |
| C | -1.13996700 | 3.83569500  | 0.70676900  |
| C | -0.86929100 | 2.84989200  | -0.24626300 |
| C | 0.47648300  | 2.69302400  | -0.72828800 |
| C | 1.48449300  | 3.49927300  | -0.11305600 |
| H | 1.98792800  | 5.04219500  | 1.27968100  |
| H | -0.38517900 | 5.38200200  | 2.00272100  |
| H | -2.16782800 | 3.95134700  | 1.03379900  |
| H | 2.50815800  | 3.36923600  | -0.44772900 |
| C | -2.06845200 | 1.97854000  | -0.56633100 |
| O | -3.13786500 | 2.52834400  | -0.86242900 |
| N | -1.87238000 | 0.64802800  | -0.34946600 |
| C | -2.90097300 | -0.27879800 | -0.32029200 |
| C | -2.50243600 | -1.63080900 | -0.01804100 |
| C | -4.26249800 | -0.04726900 | -0.53110200 |
| C | -3.46423700 | -2.68068700 | 0.08163400  |
| C | -5.20264300 | -1.09379100 | -0.42885100 |
| H | -4.58183000 | 0.95612300  | -0.76791100 |
| C | -0.75253500 | -3.09942000 | 0.44330300  |
| C | -2.98165200 | -3.97828400 | 0.38517900  |
| C | -4.83370800 | -2.38722200 | -0.12780500 |

|        |             |             |             |    |             |             |             |
|--------|-------------|-------------|-------------|----|-------------|-------------|-------------|
| H      | -6.25048900 | -0.86022400 | -0.59620200 | C  | -1.16871900 | 2.69845400  | -0.15828800 |
| C      | -1.63380700 | -4.19157200 | 0.56730200  | C  | 0.13751700  | 2.54794100  | -0.71958200 |
| H      | 0.31837500  | -3.22531300 | 0.56894700  | C  | 1.15187100  | 3.41078800  | -0.22971800 |
| H      | -3.69069300 | -4.79727100 | 0.46874000  | H  | 1.72609300  | 4.99151700  | 1.09363500  |
| H      | -5.56744300 | -3.18372300 | -0.05300200 | H  | -0.58577600 | 5.28097900  | 2.00662800  |
| H      | -1.24119000 | -5.17560200 | 0.79858900  | H  | -2.40552900 | 3.79367900  | 1.18566500  |
| N      | -1.17226500 | -1.87625900 | 0.16555500  | H  | 2.13332700  | 3.34519000  | -0.68511300 |
| Co     | -0.03822000 | -0.14494400 | -0.12610200 | C  | -2.34887500 | 1.77251300  | -0.34773800 |
| C      | 4.51867000  | -1.41911700 | -1.28015900 | O  | -3.50582100 | 2.20938000  | -0.37232900 |
| C      | 3.82978200  | -2.05925700 | -0.21888000 | N  | -2.00101500 | 0.46083000  | -0.33899900 |
| C      | 2.68008900  | -1.46883600 | 0.31470700  | C  | -2.86293400 | -0.60138700 | -0.18667100 |
| C      | 2.15511200  | -0.26391900 | -0.19103800 | C  | -2.17879400 | -1.84714200 | -0.03536000 |
| C      | 2.83208200  | 0.35092000  | -1.31257100 | C  | -4.25581100 | -0.61031600 | -0.14683300 |
| C      | 4.04362600  | -0.24150500 | -1.79820700 | C  | -2.87536500 | -3.07276900 | 0.13885100  |
| H      | 5.42179000  | -1.88402800 | -1.66218200 | C  | -4.94467800 | -1.82845300 | 0.04124200  |
| H      | 2.20553300  | -1.91141000 | 1.18466000  | H  | -4.78844000 | 0.32315400  | -0.25723700 |
| H      | 1.87986000  | 0.56539000  | 0.87712800  | C  | -0.09871500 | -2.91174900 | 0.01596700  |
| H      | 4.56802400  | 0.23670600  | -2.62156600 | C  | -2.09003800 | -4.24709100 | 0.25683900  |
| C      | 2.28035700  | 1.44114200  | -2.00244000 | C  | -4.29179200 | -3.03780300 | 0.18065400  |
| C      | 0.88785000  | 1.85287100  | -1.80565600 | H  | -6.03024000 | -1.80402400 | 0.07159200  |
| C      | -0.10829800 | -0.31829300 | -2.18527400 | C  | -0.71604700 | -4.16626000 | 0.19286300  |
| C      | -0.06072900 | 1.09763700  | -2.72554300 | H  | 0.97648500  | -2.80548300 | -0.05327500 |
| H      | -1.04908400 | -0.84181200 | -2.34568000 | H  | -2.58355500 | -5.20521300 | 0.39117800  |
| H      | 0.75675500  | -0.92375900 | -2.45344200 | H  | -4.84314000 | -3.96204800 | 0.31993400  |
| H      | 0.32074100  | 1.13964100  | -3.75434500 | H  | -0.09427200 | -5.05092600 | 0.27109800  |
| H      | -1.05465700 | 1.54819800  | -2.72582100 | N  | -0.81060000 | -1.79927000 | -0.08136800 |
| H      | 2.80862300  | 1.80921600  | -2.88309500 | Co | -0.18101900 | -0.03523500 | -0.33027800 |
| C      | 0.71660600  | 0.93130000  | 2.48151900  | C  | 4.64084700  | -0.84060100 | -1.17804500 |
| O      | 1.85549800  | 1.19653400  | 1.96597100  | C  | 4.09269500  | -1.49146600 | -0.05648600 |
| O      | -0.15690900 | 0.22085400  | 1.90880200  | C  | 2.83144800  | -1.10792200 | 0.40649000  |
| C      | 0.40125700  | 1.53543000  | 3.82563800  | C  | 2.07483100  | -0.10915500 | -0.23789600 |
| H      | -0.06995600 | 2.50919400  | 3.65243400  | C  | 2.64416000  | 0.53829600  | -1.37523200 |
| H      | -0.30419200 | 0.90608100  | 4.37091200  | C  | 3.92739500  | 0.15227200  | -1.82435900 |
| H      | 1.31152900  | 1.69315800  | 4.40668100  | H  | 5.62709200  | -1.13907900 | -1.51925700 |
| O      | 4.39319300  | -3.21053300 | 0.22202400  | H  | 2.42771800  | -1.55200600 | 1.31055100  |
| C      | 3.77251600  | -3.89004100 | 1.30846800  | H  | 1.64514800  | 0.66071600  | 0.74789000  |
| H      | 4.37925600  | -4.77747600 | 1.49391300  | H  | 4.35313700  | 0.62959300  | -2.70328800 |
| H      | 3.75321400  | -3.26936700 | 2.21204800  | C  | 1.77480200  | 1.32153600  | -2.22923300 |
| H      | 2.75037200  | -4.19847400 | 1.05643900  | C  | 0.50177400  | 1.76126100  | -1.92176100 |
|        |             |             |             | C  | -0.48851300 | -0.28812000 | -2.28876500 |
|        |             |             |             | C  | -0.54132300 | 1.14889300  | -2.83622200 |
| TS11_S |             |             |             | H  | -1.40863500 | -0.85647300 | -2.43975500 |
| C      | 0.91396800  | 4.35804400  | 0.75063400  | H  | 0.36821200  | -0.83223700 | -2.69555400 |
| C      | -0.37709300 | 4.52019000  | 1.26075800  | H  | -0.23557300 | 1.21290900  | -3.88869400 |
| C      | -1.39799200 | 3.69847600  | 0.79625400  |    |             |             |             |

H -1.52821100 1.60603600 -2.74071500  
H 1.95362900 1.15625700 -3.29364500  
C 0.47526800 0.92595200 2.37693100  
O 1.59647800 1.29534300 1.89962000  
O -0.35489900 0.23263600 1.72701000  
C 0.11724400 1.37320900 3.77324600  
H -0.37733700 2.34772000 3.69826500  
H -0.57814100 0.67018100 4.23506000  
H 1.01295200 1.49089800 4.38599700  
O 4.86693700 -2.46336400 0.49772600  
C 4.38055900 -3.11467400 1.66439900  
H 5.14837300 -3.83542200 1.95012300  
H 4.22586400 -2.40615900 2.48725600  
H 3.44194200 -3.64880300 1.46789500

TS11\_T

C 0.48862100 -4.39020300 0.27003000  
C -0.57389700 -4.53867900 -0.62596200  
C -1.56157000 -3.56061800 -0.69404900  
C -1.50470000 -2.42204800 0.11772100  
C -0.44022000 -2.27279300 1.04892200  
C 0.54425500 -3.28055500 1.10385900  
H 1.26703900 -5.14478500 0.32571400  
H -0.62834500 -5.41179100 -1.26934800  
H -2.38846900 -3.65193400 -1.39072300  
H 1.34623100 -3.18156900 1.82782100  
C -2.53855100 -1.34281600 -0.11762300  
O -3.74319000 -1.60160900 -0.21855700  
N -1.93797800 -0.13299100 -0.23759700  
C -2.56366200 1.08452600 -0.39950200  
C -1.65096600 2.18752900 -0.40970600  
C -3.92519900 1.34915100 -0.51099000  
C -2.11353000 3.52681300 -0.52360000  
C -4.37657700 2.68263500 -0.63091900  
H -4.61971500 0.52079500 -0.50375000  
C 0.57266600 2.86689900 -0.27013000  
C -1.13232200 4.54941200 -0.51011400  
C -3.50907300 3.75591600 -0.63887500  
H -5.44481400 2.85923400 -0.71897700  
C 0.19981600 4.22188800 -0.38236300  
H 1.61096800 2.57284700 -0.16481000  
H -1.44450300 5.58629000 -0.59781400  
H -3.87469400 4.77364800 -0.73234100  
H 0.96943800 4.98560700 -0.36486200

N -0.31824800 1.88534700 -0.28866100  
Co -0.04575800 -0.10900400 -0.21918700  
C 3.92967800 1.18638100 1.92894600  
C 4.09255200 1.10083800 0.53717400  
C 3.11101200 0.45873700 -0.22541400  
C 1.97381700 -0.11860200 0.36658700  
C 1.82098000 -0.03387400 1.77414100  
C 2.80601700 0.63989300 2.52704600  
H 4.69063700 1.69210200 2.51451700  
H 3.22528100 0.37560200 -1.30069900  
H 1.71678200 -1.15331500 -0.52903200  
H 2.67519100 0.74312000 3.60146300  
C 0.59378900 -0.42922200 2.47979200  
C -0.43661500 -1.24625300 2.14086000  
C -2.67503200 -0.21320100 2.74461800  
C -1.66855500 -1.26740700 3.06628200  
H -3.60520800 -0.45372200 2.24480300  
H -2.40093400 0.83249200 2.84425300  
H -1.29806600 -1.12617500 4.09208600  
H -2.13052100 -2.25762500 3.02113500  
H 0.46371900 0.09435200 3.42724100  
C 0.94621000 -1.65570700 -2.34291500  
O 1.83965000 -1.97921400 -1.48715500  
O 0.06784900 -0.77529100 -2.12305500  
C 0.93503700 -2.39218100 -3.65706800  
H 0.39158800 -3.33267600 -3.51577300  
H 0.42168400 -1.80692300 -4.42124200  
H 1.95185500 -2.63423300 -3.97270000  
O 5.21936900 1.67376700 0.03353300  
C 5.42070200 1.62028400 -1.37375700  
H 6.36589900 2.13207200 -1.56241700  
H 5.49255500 0.58626500 -1.73233800  
H 4.61791100 2.13522900 -1.91642400

17\_Q

C -2.82857300 3.48227900 -0.62350800  
C -1.95075900 3.92220600 -1.61652100  
C -0.62193000 3.51147900 -1.58839100  
C -0.14990500 2.64623800 -0.59282400  
C -1.02944300 2.21514900 0.42690100  
C -2.36562000 2.64843500 0.38901900  
H -3.86748100 3.79804000 -0.62928100  
H -2.29936000 4.58251700 -2.40489200  
H 0.07878300 3.84916600 -2.34447100

|    |             |             |             |      |             |             |             |
|----|-------------|-------------|-------------|------|-------------|-------------|-------------|
| H  | -3.03893000 | 2.32443400  | 1.17495500  |      |             |             |             |
| C  | 1.29844500  | 2.22504400  | -0.71791000 | 17_S |             |             |             |
| O  | 2.14220600  | 3.07483400  | -1.02808900 | C    | 3.33681200  | -3.49544700 | -0.86443300 |
| N  | 1.51588000  | 0.88986900  | -0.52269600 | C    | 2.40091800  | -4.03242800 | -1.74847900 |
| C  | 2.77981500  | 0.31080400  | -0.59288400 | C    | 1.05271400  | -3.71752300 | -1.59942200 |
| C  | 2.82388000  | -1.09001800 | -0.26425600 | C    | 0.61540800  | -2.85472800 | -0.58697300 |
| C  | 3.98611400  | 0.92345700  | -0.92969000 | C    | 1.55483100  | -2.33275800 | 0.32354400  |
| C  | 4.04715500  | -1.82159400 | -0.28857800 | C    | 2.91042300  | -2.66353900 | 0.16786600  |
| C  | 5.19385100  | 0.19076800  | -0.94938300 | H    | 4.39138800  | -3.73338900 | -0.96676600 |
| H  | 3.97902200  | 1.97437600  | -1.17596900 | H    | 2.71834000  | -4.69275900 | -2.54986600 |
| C  | 1.62670500  | -2.98570700 | 0.39755800  | H    | 0.30772000  | -4.12310900 | -2.27419500 |
| C  | 3.99053300  | -3.19463600 | 0.05407000  | H    | 3.62565800  | -2.27714800 | 0.88640800  |
| C  | 5.24461700  | -1.15081000 | -0.64140100 | C    | -0.85642000 | -2.52344100 | -0.60066100 |
| H  | 6.10672500  | 0.71423800  | -1.21898800 | O    | -1.63408700 | -3.36111100 | -1.07812000 |
| C  | 2.78951500  | -3.77820800 | 0.39577800  | N    | -1.21074500 | -1.26939300 | -0.17594100 |
| H  | 0.65888800  | -3.40329800 | 0.65888500  | C    | -2.49714200 | -0.78117800 | -0.39743500 |
| H  | 4.90719500  | -3.77770400 | 0.04438100  | C    | -2.64214200 | 0.61690200  | -0.12263500 |
| H  | 6.17926800  | -1.70238000 | -0.65897600 | C    | -3.62965800 | -1.45468100 | -0.86105700 |
| H  | 2.72405000  | -4.82713800 | 0.66177900  | C    | -3.87781000 | 1.30094400  | -0.30463200 |
| N  | 1.64806600  | -1.69780100 | 0.08185300  | C    | -4.84990000 | -0.77019900 | -1.05401000 |
| Co | 0.05123600  | -0.39109800 | -0.07051300 | H    | -3.55669200 | -2.50797700 | -1.07827300 |
| C  | -4.43402200 | -1.49278200 | 1.00126200  | C    | -1.60278000 | 2.55294100  | 0.67113900  |
| C  | -4.07656200 | -1.90780000 | -0.29301700 | C    | -3.91662300 | 2.67511600  | 0.03390100  |
| C  | -2.79719500 | -1.62845300 | -0.79213800 | C    | -4.99299900 | 0.57454600  | -0.78955100 |
| C  | -1.86929800 | -0.90558100 | -0.02730800 | H    | -5.70142600 | -1.33796300 | -1.41824300 |
| C  | -2.26345300 | -0.46232200 | 1.25993300  | C    | -2.78874200 | 3.29523100  | 0.52513000  |
| C  | -3.52767000 | -0.78528200 | 1.77921500  | H    | -0.69799800 | 3.00159300  | 1.05888700  |
| H  | -5.42622300 | -1.73576000 | 1.36810300  | H    | -4.84536600 | 3.22459800  | -0.08967900 |
| H  | -2.51720100 | -1.98005100 | -1.77993200 | H    | -5.94057300 | 1.08390800  | -0.93282100 |
| H  | -3.81213000 | -0.46442700 | 2.77895600  | H    | -2.79400300 | 4.34291400  | 0.80378500  |
| C  | -1.25620100 | 0.30146600  | 2.03873800  | N    | -1.53214800 | 1.26582000  | 0.34585200  |
| C  | -0.58913300 | 1.40861800  | 1.60964800  | Co   | -0.06982000 | 0.09229000  | 0.69506700  |
| C  | 1.26849000  | 1.05128000  | 3.31564400  | C    | 4.00910300  | 2.09062600  | -0.20819800 |
| C  | 0.53415300  | 2.00902700  | 2.44718900  | C    | 2.92155900  | 2.86263400  | -0.65292200 |
| H  | 1.72839900  | 1.38579300  | 4.23918900  | C    | 1.60469000  | 2.52557600  | -0.29464900 |
| H  | 1.54219800  | 0.07127500  | 2.93622400  | C    | 1.39355400  | 1.40356600  | 0.51863600  |
| H  | 0.11081800  | 2.82752400  | 3.04789200  | C    | 2.49410200  | 0.65386700  | 0.94006200  |
| H  | 1.24047400  | 2.51056500  | 1.76619800  | C    | 3.80470600  | 0.97378700  | 0.60135900  |
| H  | -0.97858300 | -0.08484200 | 3.02082400  | H    | 5.00663200  | 2.38756600  | -0.51529800 |
| O  | -5.04360900 | -2.59192300 | -0.97204000 | H    | 0.77275300  | 3.11354800  | -0.66543100 |
| C  | -4.74950000 | -3.02261100 | -2.29275000 | H    | 4.64924900  | 0.38169300  | 0.94334700  |
| H  | -3.91511800 | -3.73551500 | -2.31183800 | C    | 1.85847200  | -0.35361500 | 1.83478200  |
| H  | -5.65087500 | -3.51984300 | -2.65652200 | C    | 1.17345000  | -1.49063400 | 1.47863000  |
| H  | -4.51374300 | -2.17778000 | -2.95211200 | C    | -0.81238300 | -0.54633100 | 2.38880500  |



|   |             |             |             |
|---|-------------|-------------|-------------|
| C | 0.02213900  | -1.83316000 | 2.43987600  |
| H | -1.88916700 | -0.69637400 | 2.30819500  |
| H | -0.57544000 | 0.18195000  | 3.16772600  |
| H | 0.39847500  | -2.07852200 | 3.44142000  |
| H | -0.54172200 | -2.69287800 | 2.07676000  |
| H | 1.67203300  | 0.02187700  | 2.84075000  |
| O | 3.25256000  | 3.92812600  | -1.44072700 |
| C | 2.20007900  | 4.74029100  | -1.93898900 |
| H | 1.62963100  | 5.21001800  | -1.12709600 |
| H | 2.67662300  | 5.52000100  | -2.53621800 |
| H | 1.51334600  | 4.16932800  | -2.57690800 |

17\_T

|    |             |             |             |
|----|-------------|-------------|-------------|
| C  | 4.13414900  | -2.42464600 | -0.83233700 |
| C  | 3.38352500  | -3.06380200 | -1.81943200 |
| C  | 1.99509100  | -3.07152300 | -1.73016600 |
| C  | 1.32632500  | -2.43736500 | -0.67366100 |
| C  | 2.08391100  | -1.81438900 | 0.33719900  |
| C  | 3.48489800  | -1.81470600 | 0.23676200  |
| H  | 5.21852600  | -2.40913900 | -0.88684400 |
| H  | 3.87620600  | -3.55198700 | -2.65485800 |
| H  | 1.39334500  | -3.56182600 | -2.48668400 |
| H  | 4.06221300  | -1.34269900 | 1.02488600  |
| C  | -0.17934200 | -2.45567900 | -0.76795800 |
| O  | -0.71382800 | -3.43178500 | -1.31016200 |
| N  | -0.83254300 | -1.33474200 | -0.32216100 |
| C  | -2.17779500 | -1.11909200 | -0.62391300 |
| C  | -2.74552600 | 0.07558100  | -0.05908400 |
| C  | -3.01669300 | -1.88470300 | -1.43732900 |
| C  | -4.08327800 | 0.48181900  | -0.33773100 |
| C  | -4.34258800 | -1.48053200 | -1.70614000 |
| H  | -2.63230700 | -2.79752100 | -1.86357200 |
| C  | -2.39532100 | 1.94521800  | 1.30444800  |
| C  | -4.53740900 | 1.68423900  | 0.25658100  |
| C  | -4.88248700 | -0.32654700 | -1.18271600 |
| H  | -4.94787000 | -2.11121800 | -2.35106000 |
| C  | -3.69918800 | 2.41603900  | 1.07017800  |
| H  | -1.70181400 | 2.48807700  | 1.93794500  |
| H  | -5.55219700 | 2.01851400  | 0.06070500  |
| H  | -5.90330200 | -0.02769700 | -1.39847700 |
| H  | -4.02326200 | 3.34097000  | 1.53354000  |
| N  | -1.94840700 | 0.81969800  | 0.76174700  |
| Co | -0.19998600 | 0.01041500  | 1.01356900  |
| C  | 3.30718900  | 2.99077800  | -0.00723800 |

|   |             |             |             |
|---|-------------|-------------|-------------|
| C | 2.16172100  | 3.24298600  | -0.78693700 |
| C | 1.00526800  | 2.46112700  | -0.63474500 |
| C | 1.02696300  | 1.39762000  | 0.27227600  |
| C | 2.18062100  | 1.15280600  | 1.02669200  |
| C | 3.31947300  | 1.95349700  | 0.92038500  |
| H | 4.17346200  | 3.62841200  | -0.15105400 |
| H | 0.11633700  | 2.66693400  | -1.22181600 |
| H | 4.20198400  | 1.77590500  | 1.53025700  |
| C | 1.83523400  | 0.05405600  | 1.97245100  |
| C | 1.50316100  | -1.22208000 | 1.56739000  |
| C | -0.64526900 | -1.08918100 | 2.62352200  |
| C | 0.56814100  | -2.01894300 | 2.49273200  |
| H | -1.61898100 | -1.56188800 | 2.48833600  |
| H | -0.63668600 | -0.46297400 | 3.52073500  |
| H | 1.06065300  | -2.26286600 | 3.44280000  |
| H | 0.29886100  | -2.96177500 | 2.01277900  |
| H | 1.64280300  | 0.32181200  | 3.01318300  |
| O | 2.27947700  | 4.28297900  | -1.66281600 |
| C | 1.16525700  | 4.58274100  | -2.49109900 |
| H | 0.28774700  | 4.87670100  | -1.90090200 |
| H | 1.47146500  | 5.42289200  | -3.11739400 |
| H | 0.89770800  | 3.73399100  | -3.13291100 |

TS12\_Q

|    |             |             |             |
|----|-------------|-------------|-------------|
| C  | 1.94859400  | 4.13016400  | 1.94610800  |
| C  | 0.99114000  | 3.13943900  | 2.12956800  |
| C  | 0.29368800  | 2.60289800  | 1.03858500  |
| C  | 0.54862800  | 3.07845700  | -0.26490400 |
| C  | 1.49886400  | 4.09290300  | -0.43059100 |
| C  | 2.19453600  | 4.61360400  | 0.65944400  |
| H  | 2.49307700  | 4.52771000  | 2.79676000  |
| H  | 0.75880500  | 2.76285800  | 3.11917500  |
| H  | 1.71638200  | 4.46563500  | -1.42506800 |
| H  | 2.93422500  | 5.39296900  | 0.50092800  |
| C  | -0.19886300 | 2.47669700  | -1.41575400 |
| C  | -0.28264400 | 0.99105500  | -1.38188100 |
| C  | -0.78634600 | 1.62142100  | 1.35203300  |
| O  | -1.32844700 | 1.62999300  | 2.45216900  |
| N  | -1.14123600 | 0.66675700  | 0.37469500  |
| Co | -0.07687900 | -1.16306400 | 0.72367300  |
| C  | 1.91860700  | -2.06169400 | 1.74812800  |
| O  | 1.68436700  | -0.80671600 | 1.72206100  |
| O  | 1.02302600  | -2.85890200 | 1.31999600  |
| C  | 3.23925200  | -2.59271900 | 2.22978400  |

|        |             |             |             |    |             |             |             |
|--------|-------------|-------------|-------------|----|-------------|-------------|-------------|
| H      | 3.74209100  | -3.08123400 | 1.38891600  | C  | -0.37020900 | 3.77443400  | -1.49243000 |
| H      | 3.86666100  | -1.79218000 | 2.62291800  | C  | 0.08071800  | 2.87359500  | -0.52520800 |
| H      | 3.07556200  | -3.35242300 | 2.99950300  | C  | -0.58558500 | 2.75633600  | 0.70664000  |
| C      | -1.42216600 | 3.21667600  | -1.93893600 | C  | -1.71674200 | 3.54249900  | 0.93826300  |
| C      | -0.19141400 | 3.12692300  | -2.79106900 | C  | -2.18143300 | 4.42259100  | -0.04034000 |
| H      | -1.64753700 | 4.17192500  | -1.47569900 | H  | -1.86894400 | 5.22726400  | -2.01790100 |
| H      | -2.29073700 | 2.62112200  | -2.20044800 | H  | 0.17899700  | 3.85676400  | -2.42393500 |
| H      | -0.20264000 | 2.45405500  | -3.64258700 | H  | -2.24509300 | 3.45895800  | 1.88224300  |
| H      | 0.39644600  | 4.02559200  | -2.94340300 | H  | -3.06882300 | 5.01860200  | 0.15173200  |
| C      | -2.50512400 | 0.36097900  | 0.24625900  | C  | -0.00151600 | 1.82199300  | 1.72211700  |
| C      | -2.84894400 | -1.00555500 | 0.05429200  | C  | 0.21006600  | 0.41134700  | 1.25071000  |
| C      | -3.51824200 | 1.33601100  | 0.16405600  | C  | 1.34374000  | 2.12446700  | -0.76693400 |
| C      | -4.20226300 | -1.38542600 | -0.23122800 | O  | 2.27828600  | 2.62233300  | -1.38379900 |
| C      | -4.83507400 | 0.96117400  | -0.09998500 | N  | 1.39689900  | 0.82121000  | -0.24207200 |
| H      | -3.26583400 | 2.37815100  | 0.32485000  | Co | 0.22184300  | -0.46621600 | -1.09418900 |
| C      | -2.12492900 | -3.24575900 | -0.02440100 | C  | -1.75022700 | -0.56287600 | -2.32342500 |
| C      | -4.44943900 | -2.76979700 | -0.42768200 | O  | -1.28256300 | 0.54984000  | -1.91323700 |
| C      | -5.18654200 | -0.37428000 | -0.30311000 | O  | -1.06983400 | -1.61235900 | -2.07887200 |
| H      | -5.60300400 | 1.72821600  | -0.14689800 | C  | -3.07489500 | -0.63128000 | -3.02681400 |
| C      | -3.41029500 | -3.69043900 | -0.32190900 | H  | -3.17720200 | 0.20474200  | -3.72329300 |
| H      | -1.28543300 | -3.92424400 | 0.08183200  | H  | -3.18633800 | -1.58043400 | -3.55369900 |
| H      | -5.45814800 | -3.09876000 | -0.65923300 | H  | -3.87167000 | -0.54482900 | -2.27990500 |
| H      | -6.21490700 | -0.65170700 | -0.51327900 | C  | 1.04818500  | 2.38042300  | 2.66570100  |
| H      | -3.58842500 | -4.75086800 | -0.46561100 | C  | -0.30146800 | 1.97442300  | 3.19549000  |
| N      | -1.85474200 | -1.93418000 | 0.15199600  | H  | 1.26716400  | 3.44064800  | 2.58970300  |
| C      | 0.90857900  | 0.14999300  | -1.44034300 | H  | 1.90407500  | 1.75197200  | 2.89260000  |
| C      | 0.75970700  | -1.23391700 | -1.75211100 | H  | -0.37153400 | 1.06257600  | 3.78034400  |
| C      | 2.21812400  | 0.59741600  | -1.15399300 | H  | -0.98879100 | 2.75462900  | 3.50389000  |
| C      | 1.83753300  | -2.10725000 | -1.72910600 | C  | 2.66011700  | 0.24719800  | 0.02766500  |
| H      | -0.21800200 | -1.60727000 | -2.04332000 | C  | 2.70454200  | -1.15771200 | -0.15153200 |
| C      | 3.30108400  | -0.27295600 | -1.13725600 | C  | 3.77780600  | 0.89367300  | 0.52818200  |
| H      | 2.39419100  | 1.64029800  | -0.92959600 | C  | 3.85677600  | -1.91712000 | 0.17692500  |
| C      | 3.11766700  | -1.63905200 | -1.39370200 | C  | 4.93517700  | 0.14685500  | 0.84589300  |
| H      | 1.70607900  | -3.16023600 | -1.95252800 | H  | 3.77130100  | 1.96836700  | 0.65907100  |
| H      | 4.28204700  | 0.11885100  | -0.89801900 | C  | 1.53864100  | -3.03146500 | -0.88318700 |
| H      | -1.12648500 | 0.58419000  | -1.93247600 | C  | 3.78923000  | -3.31647600 | -0.05068000 |
| O      | 4.10313400  | -2.57714400 | -1.33956500 | C  | 4.98467800  | -1.22456700 | 0.68622600  |
| C      | 5.42180200  | -2.13936000 | -1.03164100 | H  | 5.80414800  | 0.67357500  | 1.22833500  |
| H      | 5.47058200  | -1.66694100 | -0.04317000 | C  | 2.63729700  | -3.86129800 | -0.57803100 |
| H      | 6.04372100  | -3.03589800 | -1.03214400 | H  | 0.61745200  | -3.42617800 | -1.29658600 |
| H      | 5.79909800  | -1.43857700 | -1.78663500 | H  | 4.64573800  | -3.94056700 | 0.18617400  |
|        |             |             |             | H  | 5.88227500  | -1.78151500 | 0.93653600  |
| TS12_S |             |             |             | H  | 2.55785300  | -4.92614300 | -0.76766100 |
| C      | -1.50907400 | 4.54015700  | -1.25841100 | N  | 1.56711800  | -1.71838300 | -0.67256500 |

|        |             |             |             |      |             |             |             |
|--------|-------------|-------------|-------------|------|-------------|-------------|-------------|
| C      | -0.97033000 | -0.47425600 | 1.16092300  | H    | -1.93627200 | 2.37554500  | -2.67454000 |
| C      | -0.82553300 | -1.83662500 | 1.52465500  | H    | 0.25122600  | 1.80043300  | -3.82752600 |
| C      | -2.27504400 | -0.01196900 | 0.89817000  | H    | 0.95216700  | 3.39250200  | -3.28446200 |
| C      | -1.90283100 | -2.70154300 | 1.53566700  | C    | -2.62540200 | 0.39861000  | 0.06090800  |
| H      | 0.16150900  | -2.21183400 | 1.77770100  | C    | -2.82928500 | -1.01364200 | 0.12070200  |
| C      | -3.36511400 | -0.87896300 | 0.89981700  | C    | -3.71510000 | 1.21062200  | -0.21984600 |
| H      | -2.43539000 | 1.02509200  | 0.63846000  | C    | -4.12344900 | -1.57170000 | -0.09623500 |
| C      | -3.18587700 | -2.23516200 | 1.20214700  | C    | -4.99525000 | 0.65828100  | -0.43324500 |
| H      | -1.78158300 | -3.74604100 | 1.80403900  | H    | -3.57826400 | 2.28481800  | -0.25568400 |
| H      | -4.34910300 | -0.48509700 | 0.67483600  | C    | -1.89862000 | -3.10887300 | 0.50371700  |
| H      | 1.01725900  | -0.08144600 | 1.78568600  | C    | -4.24560800 | -2.98155700 | -0.00139900 |
| O      | -4.18192200 | -3.16436200 | 1.22435300  | C    | -5.20700100 | -0.70417000 | -0.37964600 |
| C      | -5.49015800 | -2.74366600 | 0.86597600  | H    | -5.82464900 | 1.32614300  | -0.64522800 |
| H      | -5.51978400 | -2.34172200 | -0.15476400 | C    | -3.14133600 | -3.74610000 | 0.30161800  |
| H      | -6.11953500 | -3.63395700 | 0.91772900  | H    | -1.00461600 | -3.67542600 | 0.74560000  |
| H      | -5.87921000 | -1.98909200 | 1.56162800  | H    | -5.21633200 | -3.44177200 | -0.16253800 |
|        |             |             |             | H    | -6.19407800 | -1.12462100 | -0.54555700 |
|        |             |             |             | H    | -3.20766100 | -4.82485700 | 0.38948300  |
| TS12_T |             |             |             | N    | -1.74665600 | -1.79708200 | 0.40787700  |
| C      | 1.87839200  | 4.20562200  | 1.68101600  | C    | 0.88649600  | -0.23782200 | -1.34426300 |
| C      | 0.73895900  | 3.42663300  | 1.85917900  | C    | 0.61439200  | -1.62700600 | -1.58124000 |
| C      | 0.16545000  | 2.75051300  | 0.77869700  | C    | 2.25069700  | 0.12066100  | -1.11692600 |
| C      | 0.71983400  | 2.87764200  | -0.50764100 | C    | 1.63946700  | -2.57434700 | -1.57622600 |
| C      | 1.85284200  | 3.67812600  | -0.67969100 | H    | -0.38352200 | -1.92677000 | -1.88256200 |
| C      | 2.43402500  | 4.33274400  | 0.40674800  | C    | 3.25145100  | -0.82716800 | -1.09774300 |
| H      | 2.32859200  | 4.71398200  | 2.52804000  | H    | 2.50521000  | 1.15584200  | -0.93708500 |
| H      | 0.27570700  | 3.32615300  | 2.83417300  | C    | 2.95274900  | -2.19425800 | -1.31094000 |
| H      | 2.29430500  | 3.77999200  | -1.66551000 | H    | 1.42650700  | -3.61957000 | -1.77422900 |
| H      | 3.32071800  | 4.94151200  | 0.25571800  | H    | 4.26977300  | -0.50883100 | -0.91094000 |
| C      | 0.03728600  | 2.17072200  | -1.63967200 | H    | -1.06409700 | 0.33236400  | -1.97277400 |
| C      | -0.20810200 | 0.71464800  | -1.42243100 | O    | 3.88229700  | -3.18916100 | -1.30306300 |
| C      | -1.10657800 | 2.00083800  | 1.01135400  | C    | 5.22813800  | -2.84744600 | -1.00136800 |
| O      | -1.90249300 | 2.37409500  | 1.87244300  | H    | 5.31832400  | -2.40209900 | -0.00279100 |
| N      | -1.31514500 | 0.87426300  | 0.22777300  | H    | 5.78902500  | -3.78339800 | -1.02600300 |
| Co     | 0.02286300  | -0.75637600 | 0.62891400  | H    | 5.65016300  | -2.15854000 | -1.74403400 |
| C      | 1.86256200  | -1.14619500 | 2.23025300  |      |             |             |             |
| O      | 1.57448300  | 0.04783800  | 1.90765100  |      |             |             |             |
| O      | 1.17980700  | -2.12223700 | 1.78266700  | 18_Q |             |             |             |
| C      | 3.05427500  | -1.40515100 | 3.12365200  | C    | 2.50778000  | 3.80922400  | 1.96039900  |
| H      | 3.96989800  | -1.22679600 | 2.54865200  | C    | 1.35864300  | 3.03693800  | 2.08554500  |
| H      | 3.05515800  | -0.70496700 | 3.96337900  | C    | 0.68501600  | 2.58911800  | 0.94398300  |
| H      | 3.06016500  | -2.43298800 | 3.48999600  | C    | 1.15307300  | 2.91920400  | -0.34067000 |
| C      | -1.04194500 | 2.92478200  | -2.39558900 | C    | 2.30146500  | 3.70921300  | -0.45334800 |
| C      | 0.25328500  | 2.58859600  | -3.08101900 | C    | 2.97428900  | 4.14751700  | 0.68706600  |
| H      | -1.21062300 | 3.95734000  | -2.10774900 | H    | 3.03645000  | 4.14870200  | 2.84534600  |

|    |             |             |             |      |             |             |             |
|----|-------------|-------------|-------------|------|-------------|-------------|-------------|
| H  | 0.96254900  | 2.76501300  | 3.05712200  | H    | 2.49360700  | 0.86165600  | -0.75264800 |
| H  | 2.68136800  | 3.97688000  | -1.43330500 | C    | 2.33946300  | -2.40975000 | -1.63846500 |
| H  | 3.86981800  | 4.75254600  | 0.58011900  | H    | 0.57433800  | -3.43202300 | -2.31754600 |
| C  | 0.36407100  | 2.42028800  | -1.50376200 | H    | 3.92579300  | -1.10075200 | -0.95308800 |
| C  | -0.26372700 | 1.05883700  | -1.27444900 | H    | -1.05034300 | 0.92063600  | -2.01677500 |
| C  | -0.56954400 | 1.81708000  | 1.13034200  | O    | 3.04249800  | -3.55904200 | -1.75903100 |
| O  | -1.21261300 | 1.85272000  | 2.16856600  | C    | 4.40944900  | -3.55831700 | -1.35872300 |
| N  | -0.98681600 | 0.99046300  | 0.05495400  | H    | 4.51467500  | -3.28728400 | -0.30147000 |
| Co | -0.13108100 | -1.03555100 | 0.80317200  | H    | 4.76436800  | -4.57927600 | -1.50485800 |
| C  | 1.82975300  | -1.69148400 | 2.05801700  | H    | 5.00932500  | -2.87688000 | -1.97382800 |
| O  | 1.50115500  | -0.46228500 | 1.91992200  |      |             |             |             |
| O  | 1.08633100  | -2.58799400 | 1.55071200  | 18_S |             |             |             |
| C  | 3.08916800  | -2.04735100 | 2.79646500  | C    | 1.85063400  | 3.51004800  | 2.35320000  |
| H  | 3.23461900  | -3.12746600 | 2.82760300  | C    | 0.66745900  | 2.82213300  | 2.10495900  |
| H  | 3.94178500  | -1.56923100 | 2.30401400  | C    | 0.38950900  | 2.33902700  | 0.82290400  |
| H  | 3.03854600  | -1.64976700 | 3.81475800  | C    | 1.28277900  | 2.57553700  | -0.23427200 |
| C  | -0.45166600 | 3.42823600  | -2.30348500 | C    | 2.46835900  | 3.26884300  | 0.02646700  |
| C  | 0.73268200  | 2.74664600  | -2.92784700 | C    | 2.75676000  | 3.72742100  | 1.31162400  |
| H  | -0.34894700 | 4.47110600  | -2.02123700 | H    | 2.06800700  | 3.87552400  | 3.35244100  |
| H  | -1.44923100 | 3.13326700  | -2.61413100 | H    | -0.05165100 | 2.63750300  | 2.89604600  |
| H  | 0.54786100  | 1.97193800  | -3.66592800 | H    | 3.17469400  | 3.45255400  | -0.77669200 |
| H  | 1.62788400  | 3.32904600  | -3.11607900 | H    | 3.68597600  | 4.25783600  | 1.49820800  |
| C  | -2.41753400 | 0.73985200  | -0.04829200 | C    | 0.85570600  | 2.12866300  | -1.59612600 |
| C  | -2.87590900 | -0.57052900 | 0.13876700  | C    | 0.19060700  | 0.76500500  | -1.62735200 |
| C  | -3.29236300 | 1.78619800  | -0.38182700 | C    | -0.89536300 | 1.61813700  | 0.59961900  |
| C  | -4.27068100 | -0.85748300 | -0.05311200 | O    | -1.97119200 | 2.00540300  | 1.07488800  |
| C  | -4.64594300 | 1.51289900  | -0.55323200 | N    | -0.87824700 | 0.66707000  | -0.55803200 |
| H  | -2.90220300 | 2.79250900  | -0.49295200 | Co   | -0.45413900 | -0.40446100 | 1.06800100  |
| C  | -2.43126300 | -2.85671300 | 0.63668700  | C    | 1.27274800  | -0.94016900 | 2.52416100  |
| C  | -4.69734000 | -2.20580800 | 0.11243800  | O    | 1.49758900  | -0.23480800 | 1.49463200  |
| C  | -5.12798800 | 0.20975500  | -0.40009000 | O    | 0.06502300  | -1.31897300 | 2.71967200  |
| H  | -5.33098800 | 2.31618900  | -0.80792200 | C    | 2.37073200  | -1.29029500 | 3.48536200  |
| C  | -3.75278100 | -3.19357200 | 0.45356900  | H    | 2.05970600  | -2.09056000 | 4.15868100  |
| H  | -1.67773500 | -3.58740300 | 0.91024100  | H    | 3.26605300  | -1.58583500 | 2.93227600  |
| H  | -5.74371100 | -2.45579600 | -0.02853800 | H    | 2.62235400  | -0.40265800 | 4.07646800  |
| H  | -6.18453000 | -0.00043100 | -0.54214900 | C    | 0.27858400  | 3.18804200  | -2.52556400 |
| H  | -4.05725800 | -4.22775800 | 0.58110200  | C    | 1.59690700  | 2.53844000  | -2.84166700 |
| N  | -1.97905400 | -1.56105300 | 0.49054100  | H    | 0.28811000  | 4.21078200  | -2.16349100 |
| C  | 0.69027500  | -0.12497000 | -1.40767100 | H    | -0.58755300 | 2.92859100  | -3.12750400 |
| C  | 0.17343900  | -1.36012800 | -1.86673400 | H    | 1.63279800  | 1.81393300  | -3.64950800 |
| C  | 2.05745700  | -0.06624400 | -1.09922300 | H    | 2.49985600  | 3.13087300  | -2.74323600 |
| C  | 0.97904000  | -2.48500600 | -1.97862000 | C    | -2.20176400 | 0.32435500  | -1.00943300 |
| H  | -0.87540500 | -1.42907600 | -2.13672100 | C    | -2.91527900 | -0.54607400 | -0.15410000 |
| C  | 2.87812300  | -1.18857100 | -1.21148600 | C    | -2.81059700 | 0.79826700  | -2.15028900 |

|      |             |             |             |    |             |             |             |
|------|-------------|-------------|-------------|----|-------------|-------------|-------------|
| C    | -4.24498700 | -0.94096400 | -0.44859100 | O  | 1.02332500  | -2.06073000 | -2.21519800 |
| C    | -4.13021700 | 0.39302400  | -2.46744900 | N  | 0.37025200  | -1.59248800 | -0.07521100 |
| H    | -2.29434500 | 1.49183200  | -2.80361200 | Co | -0.39539000 | 0.67448000  | -0.86065600 |
| C    | -2.87134300 | -1.78456100 | 1.81159500  | C  | 0.10507300  | 2.81984800  | -2.02284300 |
| C    | -4.88281900 | -1.80615300 | 0.47780400  | O  | 0.90264000  | 1.81874800  | -1.92816100 |
| C    | -4.83814700 | -0.45246400 | -1.64143400 | O  | -1.06291800 | 2.77575300  | -1.55299200 |
| H    | -4.58881000 | 0.77179700  | -3.37529800 | C  | 0.62688200  | 4.07903900  | -2.68073200 |
| C    | -4.19686900 | -2.21800100 | 1.59911000  | H  | -0.18584800 | 4.77406300  | -2.89802600 |
| H    | -2.29999200 | -2.09243800 | 2.67985700  | H  | 1.34060700  | 4.56565200  | -2.00582700 |
| H    | -5.90278300 | -2.12986900 | 0.29391100  | H  | 1.16560400  | 3.83098700  | -3.59916300 |
| H    | -5.85209900 | -0.75080000 | -1.88933300 | C  | 2.67013100  | -2.64284100 | 2.26231300  |
| H    | -4.65685800 | -2.87479000 | 2.32903700  | C  | 2.62702900  | -1.35306800 | 3.03378100  |
| N    | -2.24668500 | -0.97712500 | 0.96178900  | H  | 3.64088800  | -3.02679500 | 1.96554100  |
| C    | 1.12825400  | -0.42722700 | -1.54295300 | H  | 1.92358000  | -3.40282100 | 2.47503400  |
| C    | 0.58605700  | -1.71823700 | -1.66270900 | H  | 1.83837500  | -1.21938000 | 3.76809700  |
| C    | 2.50103300  | -0.30709100 | -1.35036300 | H  | 3.56402400  | -0.88007400 | 3.30525900  |
| C    | 1.38642800  | -2.84641600 | -1.56928300 | C  | -0.83472900 | -2.35766400 | -0.23691200 |
| H    | -0.48051400 | -1.84059300 | -1.82793300 | C  | -2.06063100 | -1.68781000 | -0.48245000 |
| C    | 3.32544600  | -1.43215800 | -1.25998400 | C  | -0.80778900 | -3.73014400 | -0.07931900 |
| H    | 2.94782100  | 0.67261600  | -1.23980200 | C  | -3.27066400 | -2.44679500 | -0.51084500 |
| C    | 2.76787400  | -2.70929100 | -1.35911000 | C  | -1.99740500 | -4.48301600 | -0.14640100 |
| H    | 0.96793800  | -3.84366000 | -1.65733000 | H  | 0.14399000  | -4.22043800 | 0.09728200  |
| H    | 4.38794300  | -1.29733100 | -1.09904000 | C  | -3.23440800 | 0.29980300  | -0.82507600 |
| H    | -0.34177100 | 0.68718700  | -2.57714200 | C  | -4.49187700 | -1.74620600 | -0.68990800 |
| O    | 3.47432300  | -3.87211400 | -1.27690500 | C  | -3.20693500 | -3.85310900 | -0.34722100 |
| C    | 4.87060700  | -3.78206600 | -1.03283300 | H  | -1.95452800 | -5.56096100 | -0.02792700 |
| H    | 5.08322800  | -3.28035100 | -0.08016900 | C  | -4.46585300 | -0.37495200 | -0.82960500 |
| H    | 5.23684300  | -4.80925900 | -0.98576700 | H  | -3.17674000 | 1.37337400  | -0.96805200 |
| H    | 5.39076500  | -3.25274500 | -1.84145900 | H  | -5.42578700 | -2.29936800 | -0.70844300 |
|      |             |             |             | H  | -4.13033100 | -4.42385400 | -0.38141900 |
|      |             |             |             | H  | -5.37891000 | 0.19634200  | -0.95773700 |
|      |             |             |             | N  | -2.05825000 | -0.32262400 | -0.67437900 |
|      |             |             |             | C  | 0.11086600  | 0.12902400  | 1.68153700  |
|      |             |             |             | C  | -1.09168700 | 0.19740900  | 2.40452400  |
|      |             |             |             | C  | 0.68586600  | 1.33062800  | 1.22500100  |
|      |             |             |             | C  | -1.74195800 | 1.40593100  | 2.61017800  |
|      |             |             |             | H  | -1.53956900 | -0.71917000 | 2.77881900  |
|      |             |             |             | C  | 0.03692100  | 2.55647000  | 1.43675700  |
|      |             |             |             | H  | 1.66159700  | 1.33115800  | 0.75349700  |
|      |             |             |             | C  | -1.19866900 | 2.59178500  | 2.08634000  |
|      |             |             |             | H  | -2.68811600 | 1.45369400  | 3.13874300  |
|      |             |             |             | H  | 0.48933100  | 3.45980900  | 1.05019800  |
|      |             |             |             | H  | 0.20700200  | -1.96790100 | 1.96168600  |
|      |             |             |             | O  | -1.94051400 | 3.71879400  | 2.24962400  |
| 18_T |             |             |             |    |             |             |             |
| C    | 4.62020500  | 0.09179600  | -1.66316700 |    |             |             |             |
| C    | 3.39063700  | -0.51674800 | -1.89356000 |    |             |             |             |
| C    | 2.61281300  | -0.95478000 | -0.81808400 |    |             |             |             |
| C    | 3.06514900  | -0.79942800 | 0.50492800  |    |             |             |             |
| C    | 4.30236700  | -0.18729500 | 0.72343300  |    |             |             |             |
| C    | 5.07254400  | 0.25724900  | -0.35209300 |    |             |             |             |
| H    | 5.21978700  | 0.44153900  | -2.49757100 |    |             |             |             |
| H    | 3.00535600  | -0.65373500 | -2.89713700 |    |             |             |             |
| H    | 4.66843500  | -0.04768000 | 1.73481400  |    |             |             |             |
| H    | 6.02804400  | 0.73785500  | -0.16321700 |    |             |             |             |
| C    | 2.20499000  | -1.35733500 | 1.58939600  |    |             |             |             |
| C    | 0.70954700  | -1.22286800 | 1.34065300  |    |             |             |             |
| C    | 1.30115400  | -1.59157200 | -1.11529000 |    |             |             |             |

C -1.55385300 4.86661000 1.49540700  
H -2.35411600 5.59683900 1.62837800  
H -0.61572800 5.29723200 1.86858000  
H -1.44997200 4.61817700 0.43279000

19\_Q

C -3.31881200 1.50207100 -1.92938800  
C -3.07166200 2.83874600 -1.57232000  
C -1.83418500 3.19394700 -1.05521600  
C -0.85048500 2.20362700 -0.89198500  
C -1.07669800 0.84490100 -1.22344500  
C -2.33049900 0.53169500 -1.77106800  
H -4.29482400 1.22691500 -2.32233400  
H -3.84691600 3.58796400 -1.70471600  
H -1.60813300 4.22066000 -0.78340200  
H -2.55603000 -0.49676200 -2.04408000  
C 0.47323400 2.58482600 -0.35398900  
O 0.77869900 3.71688200 0.01604800  
N 1.34918500 1.47265200 -0.30870900  
C 2.66393000 1.54164700 -0.02862800  
C 3.33233000 0.25226500 -0.01597800  
C 3.44337900 2.69353700 0.22505200  
C 4.72229000 0.15782100 0.25008700  
C 4.81675900 2.58026500 0.47986000  
H 2.95320400 3.65603000 0.22368700  
C 3.13409100 -2.04062300 -0.25954700  
C 5.29774800 -1.13407000 0.25324800  
C 5.45666900 1.35142400 0.49798800  
H 5.38835500 3.48323600 0.66953100  
C 4.50265700 -2.23398000 -0.00004800  
H 2.47146200 -2.87728500 -0.45237100  
H 6.35891600 -1.24580000 0.45558000  
H 6.52109900 1.28286000 0.70023000  
H 4.91227600 -3.23771100 -0.00238500  
N 2.56972200 -0.83841000 -0.26468000  
Co 0.47533400 -0.36325400 -0.69504700  
C -0.53303200 0.05156600 2.20116600  
C 0.31303900 -0.95636800 2.43465900  
C 0.54536800 -2.39913600 2.52308100  
C 1.62114900 -1.38237300 2.94269300  
H 0.68878200 -2.94254700 1.59167500  
H 0.04024300 -2.96547400 3.30444500  
H 1.81921400 -1.26602400 4.00731700  
H 2.50357400 -1.28323000 2.31676400

C 0.26843600 -2.48020100 -1.97901900  
O -0.04134600 -2.37301700 -0.73445400  
O 0.78163500 -1.51044900 -2.59508100  
C -0.02576000 -3.78531500 -2.68107000  
H -1.10229100 -3.84719800 -2.87592900  
H 0.50723200 -3.84800200 -3.63109400  
H 0.23951800 -4.63005600 -2.03937500  
H -0.17414500 1.06604500 2.37224200  
C -1.93542800 -0.06257900 1.79067600  
C -2.74929600 1.08540400 1.81397600  
C -2.50923600 -1.26679600 1.36196900  
C -4.07995100 1.03343400 1.43056200  
H -2.32122200 2.03355300 2.12598100  
C -3.83902000 -1.33083000 0.95848200  
H -1.89440300 -2.15669200 1.29905300  
C -4.63446900 -0.17731900 0.99172200  
H -4.70336800 1.92092300 1.43702300  
H -4.24254500 -2.27499300 0.61358900  
O -5.94147200 -0.13046400 0.61067900  
C -6.53737800 -1.32706900 0.12963100  
H -7.56691500 -1.07033000 -0.12642100  
H -6.02661700 -1.70132100 -0.76660900  
H -6.54397300 -2.11332600 0.89516900

19\_S

C 2.58107000 2.70254100 1.40129000  
C 2.00153800 3.89957300 0.96418000  
C 0.74344500 3.87894800 0.36485200  
C 0.08109900 2.65831000 0.20469400  
C 0.66657300 1.45149300 0.61644300  
C 1.92006400 1.48195500 1.22550000  
H 3.56102800 2.71802100 1.87204900  
H 2.52899100 4.83976500 1.09748600  
H 0.25578100 4.78910200 0.02746500  
H 2.40029500 0.55967100 1.53832000  
C -1.29239600 2.56494600 -0.35955500  
O -1.94447700 3.52877500 -0.77391900  
N -1.72251400 1.25820800 -0.31154400  
C -3.02421600 0.84790100 -0.50233500  
C -3.26346700 -0.51464200 -0.12925700  
C -4.10502400 1.59019700 -0.97952500  
C -4.55771900 -1.10062000 -0.22129000  
C -5.38317900 0.99965400 -1.07602400  
H -3.94461500 2.62106900 -1.25958100

|    |             |             |             |    |             |             |             |
|----|-------------|-------------|-------------|----|-------------|-------------|-------------|
| C  | -2.33458600 | -2.47580300 | 0.71802700  | C  | 4.81025400  | 1.06734100  | 0.05583000  |
| C  | -4.68175000 | -2.45007200 | 0.19531500  | C  | 5.13226700  | -0.14332900 | -0.56892200 |
| C  | -5.62665200 | -0.30980200 | -0.71113200 | C  | 4.12332200  | -0.94806100 | -1.09697000 |
| H  | -6.20134900 | 1.60870600  | -1.45023000 | C  | 2.79728200  | -0.52462500 | -0.99891100 |
| C  | -3.58186800 | -3.13079200 | 0.67030600  | C  | 2.46986700  | 0.67845100  | -0.36288100 |
| H  | -1.44204800 | -2.97594300 | 1.07958300  | C  | 3.47701900  | 1.48259600  | 0.16698800  |
| H  | -5.65246800 | -2.93446200 | 0.13985600  | H  | 5.60162400  | 1.68990100  | 0.46510200  |
| H  | -6.61940600 | -0.74161500 | -0.78746600 | H  | 6.17022600  | -0.45420100 | -0.64202200 |
| H  | -3.65515900 | -4.16038400 | 1.00246100  | H  | 4.34214000  | -1.89231700 | -1.58658400 |
| N  | -2.18399800 | -1.22231200 | 0.32065500  | H  | 3.23921300  | 2.41354600  | 0.67173200  |
| Co | -0.54394200 | -0.04524700 | 0.38962700  | C  | 1.65251400  | -1.29301000 | -1.55737300 |
| C  | 0.92750400  | 0.01988800  | -1.58767200 | O  | 1.74201400  | -2.36794600 | -2.14512000 |
| C  | -0.10686700 | -0.88256900 | -1.59019300 | N  | 0.47980400  | -0.59019700 | -1.32224600 |
| C  | -0.23810500 | -2.31313400 | -1.92986400 | C  | -0.78755100 | -0.98181200 | -1.73426000 |
| C  | -1.15232700 | -1.25552300 | -2.56521300 | C  | -1.82265600 | -0.06751400 | -1.36839700 |
| H  | -0.70497400 | -2.99509300 | -1.22733900 | C  | -1.14784300 | -2.12928400 | -2.43188700 |
| H  | 0.54992100  | -2.76021600 | -2.53243500 | C  | -3.17988600 | -0.29258500 | -1.72024700 |
| H  | -0.98561600 | -0.97963700 | -3.60386500 | C  | -2.50274600 | -2.35767100 | -2.76952200 |
| H  | -2.19457100 | -1.27042600 | -2.27057300 | H  | -0.38104400 | -2.83870700 | -2.70618200 |
| C  | -0.02471200 | -0.82728900 | 2.52143100  | C  | -2.33942500 | 1.92307200  | -0.27080900 |
| O  | 0.51934300  | -1.32180100 | 1.47538700  | C  | -4.11733100 | 0.68751000  | -1.31602200 |
| O  | -0.87440300 | 0.10232800  | 2.33451000  | C  | -3.50673600 | -1.47323500 | -2.43633300 |
| C  | 0.34830500  | -1.28466200 | 3.89646600  | H  | -2.74831900 | -3.26471800 | -3.31406800 |
| H  | 1.22708900  | -0.71683400 | 4.22307500  | C  | -3.70111300 | 1.79066100  | -0.59921800 |
| H  | -0.46565000 | -1.09411600 | 4.59812200  | H  | -1.97039400 | 2.76164100  | 0.30987200  |
| H  | 0.60924100  | -2.34507200 | 3.88851100  | H  | -5.16510600 | 0.55602500  | -1.57040800 |
| H  | 0.71537500  | 1.01928500  | -1.95762500 | H  | -4.53959300 | -1.66293100 | -2.71002800 |
| C  | 2.32266400  | -0.26433000 | -1.29827800 | H  | -4.40292900 | 2.55067400  | -0.27560100 |
| C  | 3.28619100  | 0.73167400  | -1.56013800 | N  | -1.43893400 | 1.02738800  | -0.64617000 |
| C  | 2.75986400  | -1.48767300 | -0.76440400 | Co | 0.56755200  | 1.01945200  | -0.35943100 |
| C  | 4.62969700  | 0.50746300  | -1.32434200 | C  | -2.83948700 | -1.37712900 | 1.53870500  |
| H  | 2.96078800  | 1.69505900  | -1.94089900 | C  | -3.55191500 | -0.40793700 | 2.10777100  |
| C  | 4.10633400  | -1.72065800 | -0.50692900 | C  | -3.59663800 | 0.80106200  | 2.93597800  |
| H  | 2.03337500  | -2.25150900 | -0.51951600 | C  | -4.87358400 | 0.17515400  | 2.35010400  |
| C  | 5.05172600  | -0.72269200 | -0.79138900 | H  | -3.25227400 | 1.74218700  | 2.51184800  |
| H  | 5.37420800  | 1.26973300  | -1.52664800 | H  | -3.42977600 | 0.71346100  | 4.00875200  |
| H  | 4.41036300  | -2.67099900 | -0.08622500 | H  | -5.55404100 | -0.32371700 | 3.03868400  |
| O  | 6.38472100  | -0.84813300 | -0.58273000 | H  | -5.37298500 | 0.70437900  | 1.54025500  |
| C  | 6.87002000  | -2.06564800 | -0.02552500 | C  | 0.75125600  | 3.44004900  | -0.17287600 |
| H  | 7.95117100  | -1.94622600 | 0.05890500  | O  | 0.57906000  | 2.61950700  | 0.80749600  |
| H  | 6.44825600  | -2.24765700 | 0.97021500  | O  | 0.84287000  | 2.97972900  | -1.33946100 |
| H  | 6.65117600  | -2.92097500 | -0.67595700 | C  | 0.86648100  | 4.91220800  | 0.11480300  |
|    |             |             |             | H  | 1.91231900  | 5.14232600  | 0.34815400  |
|    |             |             |             | H  | 0.57516700  | 5.49560000  | -0.76015600 |

19\_T

H 0.25976800 5.18749000 0.97998900  
H -3.37302100 -2.13244900 0.96284900  
C -1.38728800 -1.55776800 1.61730000  
C -0.80887000 -2.71912600 1.07334300  
C -0.52596200 -0.62062600 2.21103000  
C 0.55603400 -2.95216100 1.14157400  
H -1.44843600 -3.44857400 0.58480700  
C 0.85001500 -0.84142500 2.29126300  
H -0.93444300 0.29382700 2.62599300  
C 1.39793600 -2.02114500 1.76399300  
H 0.99717300 -3.84470500 0.71200100  
H 1.47947300 -0.09774300 2.76321700  
O 2.71633200 -2.34395000 1.80039400  
C 3.60359200 -1.45683300 2.47171200  
H 4.59894000 -1.88998800 2.36479100  
H 3.59597000 -0.46142000 2.02101300  
H 3.35529100 -1.38082400 3.53847700

TS13\_S

C 2.30258600 2.82707200 1.59066200  
C 1.58178000 3.98154600 1.26278000  
C 0.41124600 3.88022500 0.51278400  
C -0.02987000 2.62732000 0.08236900  
C 0.71320700 1.46426400 0.37272400  
C 1.88060800 1.57919900 1.13224700  
H 3.20646300 2.90270900 2.18871600  
H 1.92908200 4.95313600 1.60172400  
H -0.19012100 4.75175500 0.27328700  
H 2.47579600 0.69784200 1.34611500  
C -1.37565200 2.47252800 -0.54865100  
O -2.01745800 3.41008600 -1.03518800  
N -1.78856700 1.17645700 -0.42419700  
C -3.06577900 0.72042900 -0.67231100  
C -3.28554100 -0.60912000 -0.19523800  
C -4.12719500 1.37734700 -1.29086000  
C -4.53878100 -1.26316700 -0.33972200  
C -5.37121300 0.72345100 -1.43437100  
H -3.98235200 2.38748800 -1.64624700  
C -2.34138700 -2.44414300 0.89219200  
C -4.63845600 -2.57802200 0.18062500  
C -5.59204800 -0.56193600 -0.98003500  
H -6.17965700 1.26116300 -1.92156200  
C -3.55129000 -3.16072400 0.79587600  
H -1.45738700 -2.86491600 1.35790800

H -5.57833900 -3.11503400 0.09077500  
H -6.55796500 -1.04238400 -1.09821200  
H -3.60579800 -4.16369200 1.20404600  
N -2.21915300 -1.21659200 0.40971600  
Co -0.64219800 -0.07826100 0.41222600  
C 4.74101000 0.41475700 -1.59309600  
C 5.16185100 -0.74327000 -0.91717700  
C 4.20901700 -1.59650800 -0.34381600  
C 2.85312800 -1.29500500 -0.45659900  
C 2.42071800 -0.14480700 -1.13031100  
C 3.39180900 0.70921700 -1.68543600  
H 5.49235800 1.06574800 -2.02727600  
H 4.51053900 -2.48937700 0.18958500  
H 2.12242300 -1.94010200 0.01364100  
H 3.07444100 1.61847500 -2.18838700  
C 0.99912400 0.21067300 -1.26228300  
C -0.04124800 -0.77873300 -1.28195000  
C -0.84828600 -1.22500000 -2.44764500  
C 0.02714100 -2.20973100 -1.67756600  
H -0.52104600 -0.92198500 -3.44027900  
H -1.92474800 -1.31858000 -2.34600300  
H -0.47478700 -2.95055600 -1.06185100  
H 0.93724900 -2.56826300 -2.15298600  
H 0.81775800 1.07369400 -1.89602200  
C -0.03633800 -0.64925300 2.64191600  
O 0.40266300 -1.25611900 1.59563100  
O -0.86420700 0.28957100 2.47907300  
C 0.47272600 -1.03695100 4.00034500  
H 1.43343300 -0.53618200 4.16723200  
H -0.22405400 -0.71743100 4.77701500  
H 0.64000800 -2.11525600 4.05555700  
O 6.50320300 -0.94481600 -0.86991600  
C 6.98652700 -2.09336300 -0.18184400  
H 6.62138800 -3.02077800 -0.63963400  
H 8.07389900 -2.05703700 -0.26441000  
H 6.70483400 -2.07597800 0.87807900

TS13\_T

C 2.28926800 2.75482600 1.74478400  
C 1.56113200 3.92261100 1.49802700  
C 0.38665500 3.86351400 0.74857000  
C -0.05885100 2.64282600 0.23549400  
C 0.71294600 1.48070900 0.43094600  
C 1.87751300 1.53975900 1.19369400



|    |             |             |             |      |             |             |             |
|----|-------------|-------------|-------------|------|-------------|-------------|-------------|
| H  | 3.19281200  | 2.79138700  | 2.34678000  | O    | 0.46547500  | -1.73481700 | 1.49408900  |
| H  | 1.90009100  | 4.87098200  | 1.90419600  | O    | -0.59880100 | -0.08263400 | 2.48022000  |
| H  | -0.22527900 | 4.74427100  | 0.57907500  | C    | 0.58225500  | -1.62071500 | 3.90464000  |
| H  | 2.48172600  | 0.65061400  | 1.33755800  | H    | 1.53317200  | -1.12987300 | 4.14282600  |
| C  | -1.43270700 | 2.54321700  | -0.35982300 | H    | -0.13791300 | -1.35641100 | 4.68163700  |
| O  | -2.03763200 | 3.51668800  | -0.82195300 | H    | 0.74958900  | -2.69969800 | 3.88916800  |
| N  | -1.89115100 | 1.26364400  | -0.22150300 | O    | 6.58276000  | -0.80011700 | -0.90436800 |
| C  | -3.16616900 | 0.82704900  | -0.51217900 | C    | 7.06918700  | -1.97936200 | -0.27279100 |
| C  | -3.39046800 | -0.56205700 | -0.21150600 | H    | 8.15701000  | -1.92947900 | -0.34143100 |
| C  | -4.23218300 | 1.55980900  | -1.02924800 | H    | 6.77627100  | -2.02069600 | 0.78337400  |
| C  | -4.66280900 | -1.16660900 | -0.41597500 | H    | 6.71733800  | -2.88428000 | -0.78297300 |
| C  | -5.48955900 | 0.94939600  | -1.23508700 |      |             |             |             |
| H  | -4.07709400 | 2.60492900  | -1.25817600 | 20_Q |             |             |             |
| C  | -2.48346600 | -2.55688200 | 0.59614200  | C    | -1.98824300 | 3.54991400  | 1.53490600  |
| C  | -4.79118900 | -2.53487400 | -0.07140700 | C    | -2.12570900 | 2.36370300  | 0.81663200  |
| C  | -5.71940600 | -0.37785600 | -0.93984300 | C    | -1.26422700 | 1.27898500  | 1.02075100  |
| H  | -6.29719500 | 1.55560400  | -1.63545100 | C    | -0.23932000 | 1.41935100  | 1.98142500  |
| C  | -3.71310900 | -3.22561900 | 0.43957000  | C    | -0.13322400 | 2.59895700  | 2.72900100  |
| H  | -1.60075600 | -3.05607400 | 0.98273100  | C    | -0.98992200 | 3.66977600  | 2.50176300  |
| H  | -5.74910900 | -3.02766600 | -0.21213600 | H    | -2.67281800 | 4.37248700  | 1.34865200  |
| H  | -6.69381300 | -0.83000700 | -1.09541800 | H    | -2.93609600 | 2.27857000  | 0.10489200  |
| H  | -3.79101900 | -4.27115800 | 0.71580700  | H    | 0.64152900  | 2.66275400  | 3.48596900  |
| N  | -2.33218900 | -1.28067800 | 0.27646700  | H    | -0.88474100 | 4.58541400  | 3.07584600  |
| Co | -0.65597900 | -0.13654200 | 0.41911100  | C    | 0.76332600  | 0.33884300  | 2.30527500  |
| C  | 4.81618600  | 0.58178700  | -1.57165600 | O    | 0.90501500  | -0.02490000 | 3.47648000  |
| C  | 5.24014800  | -0.60712400 | -0.95455600 | N    | 1.47340800  | -0.12077600 | 1.22410000  |
| C  | 4.28880700  | -1.49676400 | -0.43615600 | C    | -1.40225000 | -0.02741800 | 0.22821600  |
| C  | 2.93138800  | -1.20152700 | -0.54612100 | C    | -2.82532700 | -0.54186400 | 0.03019500  |
| C  | 2.49634100  | -0.02156700 | -1.16616800 | C    | -3.18846800 | -1.73782700 | 0.67391500  |
| C  | 3.46522200  | 0.86950800  | -1.66415300 | C    | -3.79687600 | 0.06907700  | -0.77166700 |
| H  | 5.56610200  | 1.26168500  | -1.96179300 | C    | -4.45428700 | -2.29027900 | 0.53743300  |
| H  | 4.59264900  | -2.41229900 | 0.05598000  | H    | -2.45919400 | -2.24283100 | 1.30156200  |
| H  | 2.20269400  | -1.87275200 | -0.10824700 | C    | -5.07638300 | -0.47110400 | -0.92395200 |
| H  | 3.14536300  | 1.80043300  | -2.12399000 | H    | -3.57494100 | 0.98766300  | -1.30004600 |
| C  | 1.07471500  | 0.32979200  | -1.29305200 | C    | -5.41289000 | -1.65883500 | -0.26668800 |
| C  | 0.05338900  | -0.66494700 | -1.36837200 | H    | -4.72261100 | -3.21137900 | 1.04443600  |
| C  | -0.82475300 | -1.04093900 | -2.50625000 | H    | -5.79342700 | 0.04093300  | -1.55384200 |
| C  | 0.08666900  | -2.06901800 | -1.83910000 | C    | 2.35807800  | -1.19177200 | 1.30595600  |
| H  | -0.54882200 | -0.66365300 | -3.48883400 | C    | 3.07554200  | -1.47256600 | 0.09388800  |
| H  | -1.89352800 | -1.14276900 | -2.35111100 | C    | 2.61345100  | -2.01586600 | 2.40139200  |
| H  | -0.38851200 | -2.83716600 | -1.23751500 | C    | 4.00861300  | -2.54546300 | 0.00797700  |
| H  | 0.97936000  | -2.39916300 | -2.36549900 | C    | 3.53566900  | -3.08232800 | 2.30797700  |
| H  | 0.88148500  | 1.23105100  | -1.86768200 | H    | 2.10225600  | -1.81563800 | 3.33071500  |
| C  | 0.11747600  | -1.13309400 | 2.55599100  | C    | 3.47254700  | -0.85359600 | -2.12672600 |

|      |             |             |             |    |             |             |             |
|------|-------------|-------------|-------------|----|-------------|-------------|-------------|
| C    | 4.66974800  | -2.73037000 | -1.23023800 | N  | 1.36356700  | -0.41443900 | 0.98009200  |
| C    | 4.22797600  | -3.35708700 | 1.14905800  | C  | -1.52150800 | -0.20142900 | 0.30287100  |
| H    | 3.69978000  | -3.69613400 | 3.18894900  | C  | -2.94889200 | -0.62754300 | 0.01073800  |
| C    | 4.40857700  | -1.88998000 | -2.29247500 | C  | -3.43072400 | -1.81978000 | 0.57283500  |
| H    | 3.23557700  | -0.15847800 | -2.92503300 | C  | -3.83250200 | 0.10985000  | -0.78684400 |
| H    | 5.38711600  | -3.54028200 | -1.32877300 | C  | -4.73236400 | -2.25482600 | 0.35876000  |
| H    | 4.93811100  | -4.17594500 | 1.09356700  | H  | -2.77036400 | -2.41561500 | 1.19763300  |
| H    | 4.90835000  | -2.01211500 | -3.24662900 | C  | -5.14562600 | -0.30877100 | -1.01413700 |
| N    | 2.83316800  | -0.66355600 | -0.97925200 | H  | -3.49765200 | 1.03054000  | -1.25317900 |
| C    | -0.57743100 | 0.04656200  | -1.05259200 | C  | -5.60309500 | -1.49925800 | -0.43779200 |
| C    | -0.99782000 | 0.47003100  | -2.42332400 | H  | -5.09677200 | -3.17725000 | 0.79906200  |
| C    | -0.59102600 | -0.97196600 | -2.14421800 | H  | -5.79359900 | 0.29486800  | -1.63792800 |
| H    | -0.30960300 | 1.06961700  | -3.01335000 | C  | 2.47120700  | -1.27151000 | 1.01267400  |
| H    | -2.04568200 | 0.67952200  | -2.61335100 | C  | 3.42292400  | -1.07440000 | -0.03519100 |
| H    | -1.37209900 | -1.72885200 | -2.10294600 | C  | 2.74324900  | -2.26762700 | 1.94591400  |
| H    | 0.34493800  | -1.31924200 | -2.57638500 | C  | 4.61982500  | -1.84110500 | -0.12029300 |
| H    | -0.91183900 | -0.79779900 | 0.82703600  | C  | 3.92190700  | -3.04118700 | 1.84996200  |
| C    | 1.98649500  | 2.88617000  | -1.51806500 | H  | 2.05545600  | -2.43180900 | 2.76133200  |
| O    | 1.71725900  | 2.68241200  | -0.28393200 | C  | 3.97297300  | 0.16052300  | -1.93217700 |
| O    | 1.95098200  | 1.90263100  | -2.32074000 | C  | 5.50160000  | -1.53948900 | -1.18794600 |
| C    | 2.31468800  | 4.27497400  | -1.98825500 | C  | 4.85331300  | -2.84423600 | 0.85214300  |
| H    | 2.70732300  | 4.26025000  | -3.00556100 | H  | 4.09266300  | -3.81052900 | 2.59745100  |
| H    | 1.40212700  | 4.88048000  | -1.96192100 | C  | 5.18631300  | -0.54118100 | -2.08420500 |
| H    | 3.03464000  | 4.73824700  | -1.30873200 | H  | 3.67433000  | 0.94019100  | -2.62514900 |
| Co   | 1.36271400  | 0.70817800  | -0.59717400 | H  | 6.42514600  | -2.10295600 | -1.28697900 |
| O    | -6.62571600 | -2.27238100 | -0.34659900 | H  | 5.75784800  | -3.44175500 | 0.79783300  |
| C    | -7.62660800 | -1.66472600 | -1.15200200 | H  | 5.84752100  | -0.29076800 | -2.90622100 |
| H    | -7.88405300 | -0.66145000 | -0.78976000 | N  | 3.12791400  | -0.10257200 | -0.94731900 |
| H    | -7.31700200 | -1.60051800 | -2.20290400 | C  | -0.63935600 | 0.09644900  | -0.91274600 |
| H    | -8.50545600 | -2.30762100 | -1.07763600 | C  | -1.10039700 | -0.03827500 | -2.31177300 |
|      |             |             |             | C  | -0.09056500 | -1.06242300 | -1.77810700 |
| 20_S |             |             |             | H  | -0.70823100 | 0.63574800  | -3.06492500 |
| C    | -2.18987200 | 3.08021800  | 2.21033000  | H  | -2.11026900 | -0.39134500 | -2.49198300 |
| C    | -2.35136000 | 1.99982700  | 1.34340500  | H  | -0.39310800 | -2.06524800 | -1.49217200 |
| C    | -1.39244300 | 0.98522800  | 1.26174000  | H  | 0.88496100  | -1.02632300 | -2.27267800 |
| C    | -0.25936300 | 1.06428800  | 2.09215200  | H  | -1.04916600 | -1.04702400 | 0.80986800  |
| C    | -0.12307500 | 2.13113100  | 2.98890600  | C  | 1.46429400  | 2.63445000  | -1.44657300 |
| C    | -1.06944600 | 3.14952700  | 3.03799400  | O  | 1.49374200  | 2.28660000  | -0.21968300 |
| H    | -2.94944700 | 3.85600000  | 2.24898200  | O  | 1.28058900  | 1.69384300  | -2.29029500 |
| H    | -3.25011000 | 1.93747700  | 0.74292500  | C  | 1.60245900  | 4.06478500  | -1.85944700 |
| H    | 0.73932400  | 2.14415300  | 3.64655700  | H  | 2.05833100  | 4.13198400  | -2.84925100 |
| H    | -0.94183700 | 3.98033800  | 3.72564700  | H  | 0.60320400  | 4.51218100  | -1.90933600 |
| C    | 0.81057300  | 0.00823700  | 2.16389500  | H  | 2.19060800  | 4.61895700  | -1.12579400 |
| O    | 1.17043300  | -0.38645100 | 3.27963100  | Co | 1.18639700  | 0.45672300  | -0.72335100 |

|      |             |             |             |        |             |             |             |
|------|-------------|-------------|-------------|--------|-------------|-------------|-------------|
| O    | -6.85947200 | -2.00254800 | -0.59432000 | H      | 5.69205400  | -3.35099600 | 0.93460500  |
| C    | -7.77743200 | -1.26295100 | -1.38734000 | H      | 4.92029300  | -1.47279900 | -3.46980800 |
| H    | -7.95989300 | -0.26423200 | -0.97073700 | N      | 2.80361400  | -0.40775300 | -1.08999400 |
| H    | -7.42978300 | -1.16326000 | -2.42355800 | C      | -0.41832700 | -0.57107200 | -0.61095300 |
| H    | -8.71028100 | -1.82944000 | -1.37746600 | C      | -0.76246800 | -1.04450000 | -1.98980200 |
|      |             |             |             | C      | -0.09365800 | -1.97943700 | -1.00500700 |
| 20_T |             |             |             | H      | -0.16428100 | -0.66743100 | -2.81266400 |
| C    | -1.98852300 | 3.46226300  | 1.27333900  | H      | -1.80480700 | -1.21758200 | -2.23520100 |
| C    | -2.13039200 | 2.18016200  | 0.74389500  | H      | -0.69802900 | -2.75828900 | -0.54303600 |
| C    | -1.23511400 | 1.15441900  | 1.07043200  | H      | 0.93657600  | -2.26635000 | -1.19004100 |
| C    | -0.18013700 | 1.45529700  | 1.96171000  | H      | -1.03798200 | -0.92334500 | 1.36979200  |
| C    | -0.06876700 | 2.73192100  | 2.52422500  | C      | 1.29668200  | 2.62394100  | -1.89452900 |
| C    | -0.96058000 | 3.74073700  | 2.17429400  | O      | 1.76933600  | 2.65716800  | -0.71930900 |
| H    | -2.69738800 | 4.23713100  | 0.99638200  | O      | 0.72338200  | 1.54600500  | -2.28154800 |
| H    | -2.96909400 | 1.97093100  | 0.09284100  | C      | 1.36338200  | 3.81658300  | -2.80535000 |
| H    | 0.73542100  | 2.92262200  | 3.22745600  | H      | 1.39953500  | 3.50204400  | -3.85040100 |
| H    | -0.85703000 | 4.73303600  | 2.60250000  | H      | 0.45814700  | 4.41732100  | -2.66097100 |
| C    | 0.88857800  | 0.45439300  | 2.33063200  | H      | 2.22782500  | 4.43645400  | -2.56045100 |
| O    | 1.13803100  | 0.18017700  | 3.50551000  | Co     | 1.10116500  | 0.66838900  | -0.48702600 |
| N    | 1.55979900  | -0.00155500 | 1.22695500  | O      | -6.76354800 | -2.00019300 | -0.26651300 |
| C    | -1.38603200 | -0.28701300 | 0.55001600  | C      | -7.54979400 | -1.51178200 | -1.34491300 |
| C    | -2.81956100 | -0.70603400 | 0.27571100  | H      | -8.52503400 | -1.99228000 | -1.24913300 |
| C    | -3.43908700 | -1.62824000 | 1.13297500  | H      | -7.67923200 | -0.42347900 | -1.29143700 |
| C    | -3.56910300 | -0.22193600 | -0.80324400 | H      | -7.11389300 | -1.77598700 | -2.31667100 |
| C    | -4.74992100 | -2.04181000 | 0.93272500  |        |             |             |             |
| H    | -2.88222700 | -2.02520700 | 1.97755600  | TS14_Q |             |             |             |
| C    | -4.88873400 | -0.62351800 | -1.02058300 | C      | 2.31059000  | 3.87438400  | 0.19857300  |
| H    | -3.12127600 | 0.47931200  | -1.49918200 | C      | 2.37903900  | 2.58589100  | -0.32847200 |
| C    | -5.48755900 | -1.53958200 | -0.14782900 | C      | 1.22886300  | 1.90772100  | -0.74325400 |
| H    | -5.22299000 | -2.75361000 | 1.60126700  | C      | -0.00526400 | 2.57825400  | -0.65238500 |
| H    | -5.43151400 | -0.22247100 | -1.86768900 | C      | -0.06580700 | 3.88621000  | -0.14932900 |
| C    | 2.62226500  | -0.90119300 | 1.24872200  | C      | 1.08307600  | 4.52995600  | 0.29658700  |
| C    | 3.28341400  | -1.09674600 | -0.01227400 | H      | 3.22152500  | 4.36910600  | 0.52294000  |
| C    | 3.10059300  | -1.60414500 | 2.34952300  | H      | 3.34275900  | 2.10015600  | -0.41975600 |
| C    | 4.39341000  | -1.98031000 | -0.13111100 | H      | -1.02950900 | 4.38350900  | -0.11959000 |
| C    | 4.20245300  | -2.48046200 | 2.22084200  | H      | 1.02417200  | 5.53619300  | 0.69974300  |
| H    | 2.62543500  | -1.45487500 | 3.30807100  | C      | -1.30227600 | 1.99579500  | -1.11712200 |
| C    | 3.37821500  | -0.54234200 | -2.27414400 | O      | -2.12785100 | 2.68407100  | -1.70192300 |
| C    | 4.98228600  | -2.10733100 | -1.41357700 | N      | -1.54336200 | 0.66950100  | -0.71984500 |
| C    | 4.84595200  | -2.67630200 | 1.01877200  | C      | 1.31547100  | 0.54232400  | -1.42461400 |
| H    | 4.54468500  | -3.00866600 | 3.10593000  | C      | 2.62960100  | -0.18950500 | -1.20670400 |
| C    | 4.48325500  | -1.39162400 | -2.48090500 | C      | 3.35887000  | -0.68068100 | -2.29748700 |
| H    | 2.94529700  | 0.03643200  | -3.08465100 | C      | 3.10644000  | -0.46094300 | 0.08217700  |
| H    | 5.83018500  | -2.77455600 | -1.54075700 | C      | 4.52597800  | -1.41414800 | -2.11370600 |

|    |             |             |             |        |             |                         |
|----|-------------|-------------|-------------|--------|-------------|-------------------------|
| H  | 3.00925200  | -0.48294700 | -3.30745500 | TS14_S |             |                         |
| C  | 4.27783200  | -1.19087400 | 0.28362300  | C      | 2.45076500  | 3.87717700 0.35209700   |
| H  | 2.55132800  | -0.08973100 | 0.93835000  | C      | 2.38973900  | 2.60334700 -0.21127100  |
| C  | 4.99444500  | -1.67536500 | -0.81935100 | C      | 1.16330900  | 1.99115100 -0.48878200  |
| H  | 5.09248000  | -1.79130400 | -2.95880500 | C      | -0.00851900 | 2.71407600 -0.22190900  |
| H  | 4.62006900  | -1.37574700 | 1.29469100  | C      | 0.05357900  | 4.00089200 0.32727300   |
| C  | -2.70292800 | 0.03229000  | -1.17193600 | C      | 1.27903000  | 4.58109800 0.63191900   |
| C  | -3.38223500 | -0.78200900 | -0.21788500 | H      | 3.41915000  | 4.32041900 0.56621900   |
| C  | -3.18266400 | 0.07510700  | -2.49796700 | H      | 3.31087600  | 2.08102500 -0.43709600  |
| C  | -4.54454300 | -1.53183700 | -0.59610600 | H      | -0.87736900 | 4.52675900 0.50700800   |
| C  | -4.31138500 | -0.65854300 | -2.85703100 | H      | 1.32145100  | 5.57351900 1.07006800   |
| H  | -2.67291900 | 0.69277000  | -3.22575500 | C      | -1.35606900 | 2.19578700 -0.55653800  |
| C  | -3.50602600 | -1.56977600 | 1.99945000  | O      | -2.28327100 | 2.95247900 -0.83189900  |
| C  | -5.15961800 | -2.31142000 | 0.41751400  | N      | -1.52857200 | 0.80199800 -0.50802900  |
| C  | -4.99327500 | -1.45357100 | -1.93388200 | C      | 1.09955600  | 0.65373000 -1.22190600  |
| H  | -4.67048900 | -0.60419200 | -3.88079900 | C      | 2.40863500  | -0.11116400 -1.16362700 |
| C  | -4.63954000 | -2.32346800 | 1.70846900  | C      | 3.06435000  | -0.49556200 -2.33835700 |
| H  | -3.05612500 | -1.54998100 | 2.98555800  | C      | 2.97752700  | -0.48096400 0.06113700  |
| H  | -6.03840200 | -2.89961500 | 0.17033500  | C      | 4.24627900  | -1.22890900 -2.29907000 |
| H  | -5.87361400 | -2.01609200 | -2.22897500 | H      | 2.64678500  | -0.21362300 -3.30139700 |
| H  | -5.10139900 | -2.91686600 | 2.49024200  | C      | 4.16198500  | -1.21321700 0.12031900  |
| N  | -2.89516600 | -0.82182600 | 1.05485900  | H      | 2.48128400  | -0.17993600 0.97744500  |
| C  | 0.15023600  | -0.37807700 | -1.10620200 | C      | 4.80324400  | -1.59447900 -1.06746500 |
| C  | 0.17440500  | -1.69407100 | -0.38159500 | H      | 4.75615500  | -1.52453300 -3.21006100 |
| C  | -0.18020800 | -1.59809100 | -1.85507100 | H      | 4.57482900  | -1.47868100 1.08612300  |
| H  | -0.63854000 | -1.97675200 | 0.28347300  | C      | -2.75568700 | 0.28676100 -1.00177400  |
| H  | 1.13988000  | -2.09739800 | -0.09121700 | C      | -3.29648800 | -0.77039900 -0.23488500 |
| H  | 0.54225200  | -1.95301400 | -2.58793600 | C      | -3.40543000 | 0.67432600 -2.16031600  |
| H  | -1.22196100 | -1.77795200 | -2.11537500 | C      | -4.49545400 | -1.42938300 -0.61089300 |
| H  | 1.24092300  | 0.74811800  | -2.50124600 | C      | -4.60056100 | 0.02527800 -2.54463400  |
| C  | 0.35037000  | 0.25960800  | 3.17479900  | H      | -3.00978800 | 1.48280800 -2.76066500  |
| O  | 0.65872000  | 0.76478300  | 2.04119900  | C      | -3.04407600 | -2.07737500 1.66964000  |
| O  | -0.81493100 | -0.22693600 | 3.32377900  | C      | -4.95585200 | -2.46363400 0.24477600  |
| C  | 1.36716500  | 0.21346300  | 4.27868600  | C      | -5.14281600 | -1.00237600 -1.79725800 |
| H  | 1.94724600  | 1.13892000  | 4.29410800  | H      | -5.09964900 | 0.35018000 -3.45222700  |
| H  | 0.88772000  | 0.04527500  | 5.24374300  | C      | -4.23528200 | -2.77474800 1.37785500  |
| H  | 2.06082000  | -0.61174300 | 4.08096700  | H      | -2.44563300 | -2.30460300 2.54450300  |
| Co | -1.19154700 | 0.24989000  | 1.29000700  | H      | -5.87098900 | -2.99463100 0.00041400  |
| O  | 6.14477100  | -2.40030300 | -0.73507700 | H      | -6.06387000 | -1.48785200 -2.10454900 |
| C  | 6.65202300  | -2.69663000 | 0.55890700  | H      | -4.56400300 | -3.55590800 2.05427300  |
| H  | 6.90121700  | -1.78442900 | 1.11565500  | N      | -2.58194000 | -1.10929600 0.88371900  |
| H  | 5.94283000  | -3.29462200 | 1.14537300  | C      | -0.09811700 | -0.27503500 -0.88022800 |
| H  | 7.56245200  | -3.27728500 | 0.40051800  | C      | 0.10840000  | -1.78547500 -0.65344700 |
|    |             |             |             | C      | -0.45078600 | -1.26640800 -1.94633300 |

|        |             |             |             |      |             |             |             |
|--------|-------------|-------------|-------------|------|-------------|-------------|-------------|
| H      | -0.56813300 | -2.32029500 | -0.00121800 | C    | -2.80680300 | 0.34768300  | -1.02622600 |
| H      | 1.13381800  | -2.13494500 | -0.61487100 | C    | -3.38108200 | -0.72349500 | -0.28038000 |
| H      | 0.18949700  | -1.25919900 | -2.82511600 | C    | -3.45951200 | 0.79079300  | -2.16502900 |
| H      | -1.49173300 | -1.47692500 | -2.16503600 | C    | -4.61857300 | -1.30531500 | -0.67982200 |
| H      | 0.94293700  | 0.92640100  | -2.27444200 | C    | -4.68378300 | 0.21087800  | -2.56303300 |
| C      | 0.49260400  | -0.05817800 | 2.94374500  | H    | -3.03608300 | 1.60591100  | -2.73753600 |
| O      | 0.57662900  | 0.79502100  | 2.00207500  | C    | -3.20033300 | -2.14313600 | 1.54816900  |
| O      | -0.45232800 | -0.91106400 | 2.87556900  | C    | -5.12906700 | -2.35401100 | 0.12716700  |
| C      | 1.49106000  | -0.08677200 | 4.06485300  | C    | -5.26215100 | -0.81329000 | -1.84248300 |
| H      | 0.99673700  | -0.33515600 | 5.00713500  | H    | -5.17402100 | 0.58748500  | -3.45538200 |
| H      | 2.23384900  | -0.86728200 | 3.86180100  | C    | -4.42950400 | -2.76567300 | 1.23940700  |
| H      | 2.00476400  | 0.87253800  | 4.14587700  | H    | -2.60740100 | -2.44635000 | 2.40582600  |
| Co     | -1.01225700 | -0.08716200 | 1.15258700  | H    | -6.07186600 | -2.82093400 | -0.14329200 |
| O      | 5.96073100  | -2.31017300 | -1.12461200 | H    | -6.20521600 | -1.25198200 | -2.15346100 |
| C      | 6.56401300  | -2.70064900 | 0.10143400  | H    | -4.79919100 | -3.56152700 | 1.87639100  |
| H      | 7.46533200  | -3.25379600 | -0.16851400 | N    | -2.69292800 | -1.16666200 | 0.81252800  |
| H      | 6.84543400  | -1.83183100 | 0.70965400  | C    | -0.08002300 | -0.19095700 | -0.84166500 |
| H      | 5.90507800  | -3.35345500 | 0.68778100  | C    | 0.14546100  | -1.74057000 | -0.51088300 |
|        |             |             |             | C    | -0.37451300 | -1.24400500 | -1.83951300 |
| TS14_T |             |             |             | H    | -0.56029000 | -2.30555500 | 0.08975800  |
| C      | 2.35106600  | 3.85278600  | 0.71644900  | H    | 1.17564200  | -2.05542300 | -0.40851400 |
| C      | 2.32625500  | 2.63611300  | 0.03660500  | H    | 0.28207100  | -1.28012700 | -2.70553100 |
| C      | 1.11943600  | 2.04273600  | -0.34411200 | H    | -1.40867900 | -1.48886500 | -2.06140700 |
| C      | -0.07430400 | 2.73008500  | -0.06473500 | H    | 0.88904900  | 1.08524900  | -2.20414700 |
| C      | -0.04472900 | 3.96098500  | 0.60300300  | C    | 0.62185500  | -0.40743600 | 3.06320700  |
| C      | 1.16151600  | 4.51814100  | 1.01141100  | O    | 0.83698500  | 0.53701300  | 2.24308700  |
| H      | 3.30502800  | 4.28105300  | 1.01038300  | O    | -0.32054000 | -1.23904200 | 2.86455500  |
| H      | 3.26089900  | 2.14207900  | -0.19647500 | C    | 1.53001000  | -0.57499400 | 4.26045200  |
| H      | -0.98656600 | 4.46578100  | 0.78641500  | H    | 1.86885900  | 0.39730000  | 4.62485600  |
| H      | 1.17491700  | 5.46572500  | 1.54115400  | H    | 1.02941900  | -1.12690900 | 5.05833400  |
| C      | -1.41685500 | 2.24579100  | -0.49489000 | H    | 2.41543500  | -1.14432000 | 3.95300100  |
| O      | -2.33397800 | 3.03412200  | -0.72126700 | Co   | -0.80678200 | -0.27281900 | 1.01584200  |
| N      | -1.58596500 | 0.86992300  | -0.55580300 | O    | 5.99486200  | -2.12010600 | -1.42165700 |
| C      | 1.09144700  | 0.76205500  | -1.17391300 | C    | 6.64532100  | -2.57962400 | -0.24419000 |
| C      | 2.41297600  | 0.01740100  | -1.20141900 | H    | 7.54220900  | -3.10304000 | -0.58011200 |
| C      | 3.03513000  | -0.27862600 | -2.42000900 | H    | 6.93843100  | -1.74706600 | 0.40753700  |
| C      | 3.02778100  | -0.41916800 | -0.02065700 | H    | 6.01408800  | -3.27613200 | 0.32189100  |
| C      | 4.22780600  | -0.99300400 | -2.46704300 |      |             |             |             |
| H      | 2.58222100  | 0.05928600  | -3.34852400 | 21_Q |             |             |             |
| C      | 4.22501700  | -1.13310000 | -0.05009300 | C    | -1.95157200 | -4.13304000 | -0.83218500 |
| H      | 2.55821900  | -0.18942400 | 0.93147600  | C    | -2.48410800 | -2.84235500 | -0.84870500 |
| C      | 4.83099100  | -1.42766200 | -1.28017600 | C    | -1.64793000 | -1.72641100 | -0.80647700 |
| H      | 4.71076100  | -1.22079000 | -3.41156000 | C    | -0.25315200 | -1.93094500 | -0.78859700 |
| H      | 4.67377800  | -1.45231900 | 0.88276400  | C    | 0.27885100  | -3.22827400 | -0.77749100 |

|   |             |             |             |      |             |             |             |
|---|-------------|-------------|-------------|------|-------------|-------------|-------------|
| C | -0.56971800 | -4.32942500 | -0.78532000 | O    | 3.90228100  | -2.12688900 | 1.33991400  |
| H | -2.62126300 | -4.98766200 | -0.85556100 | O    | 5.12430300  | -1.33767400 | -0.31297700 |
| H | -3.55815900 | -2.70345900 | -0.88740500 | C    | 6.02914600  | -3.19718500 | 0.93599600  |
| H | 1.35537500  | -3.35313000 | -0.76993000 | H    | 5.77464800  | -4.11534500 | 0.39410500  |
| H | -0.15847700 | -5.33355300 | -0.76636600 | H    | 7.00683100  | -2.85537100 | 0.59298300  |
| C | 0.67317300  | -0.78799200 | -0.88978700 | H    | 6.05300400  | -3.42955400 | 2.00234800  |
| O | 1.88773300  | -0.98768800 | -1.22382900 | Co   | 3.25542700  | -0.57859500 | 0.13253300  |
| N | 0.20087400  | 0.44786800  | -0.67544600 | O    | -7.51464600 | 0.72628700  | 0.78271700  |
| C | -2.15624300 | -0.29257900 | -0.84790800 | C    | -8.05494800 | 0.16713400  | 1.97335700  |
| C | -3.58701600 | -0.09519800 | -0.39165600 | H    | -9.07510500 | 0.54721800  | 2.04855500  |
| C | -4.43582500 | 0.74544500  | -1.12769800 | H    | -8.08237600 | -0.92890200 | 1.92955100  |
| C | -4.09756100 | -0.67670400 | 0.77345200  | H    | -7.48873000 | 0.47957600  | 2.85962000  |
| C | -5.73647400 | 1.00293500  | -0.71630400 |      |             |             |             |
| H | -4.06546400 | 1.20972000  | -2.03773400 | 21_S |             |             |             |
| C | -5.40282400 | -0.43044500 | 1.20396700  | C    | -1.91215100 | 3.26168400  | 2.29267800  |
| H | -3.47646800 | -1.34867300 | 1.35642400  | C    | -2.26684800 | 2.01978800  | 1.76548300  |
| C | -6.23046200 | 0.41742300  | 0.45821900  | C    | -1.28848700 | 1.12071200  | 1.32855100  |
| H | -6.38959100 | 1.65272300  | -1.28924600 | C    | 0.06182400  | 1.47864600  | 1.47392900  |
| H | -5.75955000 | -0.90262800 | 2.11104800  | C    | 0.41684700  | 2.71655400  | 2.01749700  |
| C | 0.97275700  | 1.63885300  | -0.91797800 | C    | -0.56685200 | 3.61728900  | 2.41173400  |
| C | 2.03922900  | 2.01988200  | -0.07863400 | H    | -2.68901800 | 3.94817000  | 2.61670900  |
| C | 0.49148000  | 2.49940700  | -1.92388500 | H    | -3.31358600 | 1.74733500  | 1.69955800  |
| C | 2.53687200  | 3.36850000  | -0.18714200 | H    | 1.47007000  | 2.95360900  | 2.12727400  |
| C | 1.03064400  | 3.77058900  | -2.07200900 | H    | -0.28873300 | 4.58292900  | 2.82347900  |
| H | -0.31698900 | 2.15512800  | -2.56008500 | C    | 1.14853600  | 0.49072800  | 1.19911400  |
| C | 3.44756700  | 1.63794000  | 1.80627900  | O    | 2.00367100  | 0.21978000  | 2.05602400  |
| C | 3.50216200  | 3.80349300  | 0.76513700  | N    | 0.80522000  | -0.51007400 | 0.11741700  |
| C | 2.02443200  | 4.21072800  | -1.19700500 | C    | -1.59553500 | -0.26802700 | 0.77435400  |
| H | 0.66525900  | 4.42675500  | -2.85607900 | C    | -3.03586200 | -0.51984600 | 0.37908400  |
| C | 3.90649400  | 2.93471200  | 1.79156700  | C    | -3.66267200 | -1.71010900 | 0.77883700  |
| H | 3.76855200  | 0.92228900  | 2.55730900  | C    | -3.77349700 | 0.36252400  | -0.41811500 |
| H | 3.87594000  | 4.82070400  | 0.71168300  | C    | -4.96197100 | -2.01459600 | 0.39424000  |
| H | 2.42099000  | 5.21866000  | -1.27982900 | H    | -3.11907400 | -2.41186600 | 1.40613200  |
| H | 4.58874800  | 3.26910300  | 2.56665000  | C    | -5.08120300 | 0.07596400  | -0.81500800 |
| N | 2.58415000  | 1.13437600  | 0.84296400  | H    | -3.33257200 | 1.30380900  | -0.72786700 |
| C | -1.14820800 | 0.58237500  | -0.09369300 | C    | -5.68249900 | -1.12162100 | -0.41094100 |
| C | -1.18989900 | 0.74250100  | 1.40796800  | H    | -5.44118300 | -2.93570800 | 0.70914500  |
| C | -1.52776000 | 1.90170900  | 0.50471200  | H    | -5.61562000 | 0.78923800  | -1.43036600 |
| H | -0.22750400 | 0.76593600  | 1.90883000  | C    | 1.50606600  | -1.75242100 | 0.28578000  |
| H | -1.98988500 | 0.26180100  | 1.95882900  | C    | 2.89154100  | -1.68454200 | 0.01562900  |
| H | -2.57004500 | 2.18644300  | 0.41100700  | C    | 0.95131600  | -2.94086700 | 0.70458600  |
| H | -0.82225100 | 2.71988600  | 0.43842400  | C    | 3.72786800  | -2.81670300 | 0.18618100  |
| H | -2.10721400 | 0.03442300  | -1.89742000 | C    | 1.77384600  | -4.08378000 | 0.85705900  |
| C | 4.97600200  | -2.16607500 | 0.64760200  | H    | -0.11031500 | -3.00555700 | 0.91121100  |

|      |             |             |             |   |             |             |             |
|------|-------------|-------------|-------------|---|-------------|-------------|-------------|
| C    | 4.66278700  | -0.34528300 | -0.66890100 | O | -2.13181400 | -0.53804300 | 1.80574900  |
| C    | 5.10875900  | -2.64608800 | -0.09331600 | N | -0.66744200 | 0.56372900  | 0.36739200  |
| C    | 3.12948800  | -4.03071400 | 0.61266300  | C | 1.75687300  | 0.31591900  | 0.85518300  |
| H    | 1.31961800  | -5.01462500 | 1.18146100  | C | 3.16904900  | 0.48983300  | 0.33457000  |
| C    | 5.56767700  | -1.41734900 | -0.51325000 | C | 3.84480900  | 1.69826800  | 0.56264500  |
| H    | 4.98948500  | 0.63410400  | -1.00060100 | C | 3.82529700  | -0.48659900 | -0.42247500 |
| H    | 5.78767000  | -3.48468300 | 0.02917400  | C | 5.11456500  | 1.93005300  | 0.05007800  |
| H    | 3.75169900  | -4.91114200 | 0.74036100  | H | 3.36278900  | 2.47316900  | 1.15321000  |
| H    | 6.61741900  | -1.25361000 | -0.72966900 | C | 5.10217900  | -0.27403500 | -0.94557800 |
| N    | 3.36676500  | -0.47294600 | -0.41704300 | H | 3.34320500  | -1.44190700 | -0.60067600 |
| C    | -0.59415600 | -0.56254900 | -0.35760200 | C | 5.75352300  | 0.94317900  | -0.71371000 |
| C    | -0.84196900 | -0.08975000 | -1.76505200 | H | 5.63249700  | 2.86617600  | 0.23091300  |
| C    | -0.89148300 | -1.55835100 | -1.44692800 | H | 5.57422100  | -1.05857100 | -1.52401700 |
| H    | 0.02233300  | 0.28559500  | -2.29910200 | C | -1.40786900 | 1.78008400  | 0.48697500  |
| H    | -1.76859200 | 0.42921500  | -1.97572300 | C | -2.76767700 | 1.80746200  | 0.05796600  |
| H    | -1.85805000 | -2.04991900 | -1.41324100 | C | -0.81997300 | 2.94115100  | 0.94746100  |
| H    | -0.07595200 | -2.18142100 | -1.79637100 | C | -3.50943900 | 3.02271300  | 0.14789700  |
| H    | -1.36148300 | -0.98773800 | 1.57202600  | C | -1.55110200 | 4.14798000  | 1.01732900  |
| C    | 2.00211400  | 3.01335400  | -1.48185500 | H | 0.21901500  | 2.92482400  | 1.25514400  |
| O    | 0.91296200  | 2.40534800  | -1.23463500 | C | -4.58886000 | 0.68438000  | -0.85161600 |
| O    | 3.08790400  | 2.36631300  | -1.28153900 | C | -4.86170800 | 2.99940200  | -0.27896200 |
| C    | 2.01820100  | 4.44107700  | -1.94082900 | C | -2.87267300 | 4.19163300  | 0.63634000  |
| H    | 1.98775900  | 5.09248800  | -1.05968700 | H | -1.05890100 | 5.04194600  | 1.38677600  |
| H    | 2.93118900  | 4.65730700  | -2.49877800 | C | -5.40103800 | 1.83500800  | -0.77315300 |
| H    | 1.13696100  | 4.65509000  | -2.54924100 | H | -4.97576200 | -0.25200900 | -1.24190000 |
| Co   | 2.01996000  | 0.84668500  | -0.64672200 | H | -5.45367000 | 3.90748300  | -0.21137400 |
| O    | -6.94822900 | -1.50095600 | -0.73831500 | H | -3.44148300 | 5.11447400  | 0.69674300  |
| C    | -7.71668500 | -0.62252000 | -1.55006100 | H | -6.43139600 | 1.78376000  | -1.10666000 |
| H    | -8.68345000 | -1.10922200 | -1.68997100 | N | -3.32594100 | 0.66676700  | -0.45371600 |
| H    | -7.87065200 | 0.34829100  | -1.06244900 | C | 0.67865300  | 0.58035800  | -0.20964000 |
| H    | -7.24922200 | -0.46413700 | -2.53008400 | C | 0.81012900  | 0.01628700  | -1.60360800 |
|      |             |             |             | C | 0.89441300  | 1.50223200  | -1.37358000 |
| 21_T |             |             |             | H | -0.09163000 | -0.38875800 | -2.04741000 |
| C    | 2.11511200  | -3.07497800 | 2.64107700  | H | 1.72023200  | -0.51458700 | -1.85537100 |
| C    | 2.44409000  | -1.86321700 | 2.03235100  | H | 1.86546400  | 1.97976400  | -1.44928300 |
| C    | 1.45354200  | -1.03324700 | 1.50018600  | H | 0.05962800  | 2.11790300  | -1.68939700 |
| C    | 0.10750200  | -1.42831300 | 1.63224800  | H | 1.61214000  | 1.08095800  | 1.63192800  |
| C    | -0.22118400 | -2.64072200 | 2.25367800  | C | -2.64179700 | -3.03194100 | -1.66728400 |
| C    | 0.77974700  | -3.47126800 | 2.74427800  | O | -1.52871200 | -2.39808200 | -1.72313300 |
| H    | 2.90410900  | -3.70722700 | 3.03762700  | O | -3.56565900 | -2.63706400 | -0.89945900 |
| H    | 3.48314200  | -1.56130200 | 1.96827800  | C | -2.81604300 | -4.26577800 | -2.51970900 |
| H    | -1.26865900 | -2.90472400 | 2.35173700  | H | -2.16028900 | -5.05676600 | -2.13993500 |
| H    | 0.52135900  | -4.41386500 | 3.21693500  | H | -3.84902300 | -4.61558600 | -2.49874300 |
| C    | -1.00371000 | -0.53479500 | 1.22460600  | H | -2.50982100 | -4.05547800 | -3.54837600 |

|      |             |             |             |      |             |             |             |
|------|-------------|-------------|-------------|------|-------------|-------------|-------------|
| Co   | -2.19471800 | -1.03577600 | -0.32584400 | H    | -2.02853700 | 0.64824500  | -2.30831800 |
| O    | 6.99474500  | 1.25678500  | -1.17562000 | H    | -1.50927200 | -0.04031600 | -3.91624600 |
| C    | 7.67776600  | 0.28795700  | -1.96085800 | C    | -0.08235300 | -1.76537500 | 2.65971600  |
| H    | 8.63504400  | 0.73805500  | -2.22921200 | O    | 0.33732700  | -2.05193500 | 1.49418400  |
| H    | 7.86078900  | -0.63483100 | -1.39621800 | O    | -0.73518900 | -0.67718500 | 2.82169300  |
| H    | 7.12455400  | 0.04678800  | -2.87715000 | C    | 0.20458100  | -2.65672000 | 3.83309300  |
| 22_Q |             |             |             | H    | 1.12759300  | -2.31129700 | 4.31287100  |
| C    | 2.84549200  | 2.51808500  | 1.17138600  | H    | -0.60121800 | -2.59680600 | 4.56716500  |
| C    | 2.16504000  | 3.74057300  | 1.20372600  | H    | 0.35191300  | -3.68714400 | 3.50509400  |
| C    | 0.78419800  | 3.78278600  | 1.01324600  | H    | 0.23633500  | -2.03381400 | -1.58844700 |
| C    | 0.08646400  | 2.59136200  | 0.79375300  | C    | 2.17902900  | -1.06305500 | -1.47337600 |
| C    | 0.77074500  | 1.36871900  | 0.76245800  | C    | 2.72280500  | -2.06663900 | -0.64980900 |
| C    | 2.15344200  | 1.32435600  | 0.93236200  | C    | 3.03721900  | -0.04362300 | -1.91228200 |
| H    | 3.92142300  | 2.49151400  | 1.32382000  | C    | 4.05494100  | -2.04012400 | -0.26335600 |
| H    | 2.71673500  | 4.66080900  | 1.37325700  | H    | 2.07614900  | -2.85564800 | -0.28129800 |
| H    | 0.23507900  | 4.71965900  | 1.02480700  | C    | 4.37940100  | -0.00852300 | -1.54096000 |
| H    | 2.69457200  | 0.38520300  | 0.89361000  | H    | 2.64877800  | 0.74400700  | -2.54709100 |
| C    | -1.39308800 | 2.58140400  | 0.56431700  | C    | 4.89548200  | -1.00674800 | -0.70343400 |
| O    | -2.06172300 | 3.60880700  | 0.43805600  | H    | 4.46827700  | -2.80737400 | 0.38319000  |
| N    | -1.86063300 | 1.28624500  | 0.48039100  | H    | 5.00708600  | 0.79829600  | -1.89881400 |
| C    | -3.10847400 | 0.93022800  | 0.02027100  | O    | 6.18488600  | -1.06190200 | -0.26996000 |
| C    | -3.25690000 | -0.47851000 | -0.22148300 | C    | 7.06358200  | -0.01470600 | -0.65868000 |
| C    | -4.19681400 | 1.75686400  | -0.25707200 | H    | 8.02489700  | -0.23877800 | -0.19302100 |
| C    | -4.47321800 | -1.01794000 | -0.72454500 | H    | 7.19244700  | 0.02348400  | -1.74761300 |
| C    | -5.40280500 | 1.21120300  | -0.75017400 | H    | 6.71055400  | 0.96166300  | -0.30303800 |
| H    | -4.09911000 | 2.81887400  | -0.08354800 | 22_S |             |             |             |
| C    | -2.23880400 | -2.57224100 | -0.19504200 | C    | 2.85696800  | 2.13902100  | 1.52107600  |
| C    | -4.51437000 | -2.41496000 | -0.94839500 | C    | 2.35677100  | 3.42283300  | 1.27916600  |
| C    | -5.55727200 | -0.13910900 | -0.98261400 | C    | 1.04599100  | 3.58183900  | 0.82971400  |
| H    | -6.22981700 | 1.88678200  | -0.94821200 | C    | 0.25558400  | 2.44952100  | 0.61953400  |
| C    | -3.40504600 | -3.19060500 | -0.68242400 | C    | 0.75770900  | 1.15453900  | 0.83088700  |
| H    | -1.34435300 | -3.14127800 | 0.03510200  | C    | 2.06167100  | 1.00693500  | 1.30210100  |
| H    | -5.42593900 | -2.86355700 | -1.33301300 | H    | 3.87694400  | 2.01574400  | 1.87752200  |
| H    | -6.49122600 | -0.54262300 | -1.36049600 | H    | 2.98500800  | 4.29258900  | 1.44992400  |
| H    | -3.41324900 | -4.26239500 | -0.84533600 | H    | 0.61958900  | 4.56464600  | 0.64939900  |
| N    | -2.16811700 | -1.26440200 | 0.01839400  | H    | 2.47258100  | 0.01813100  | 1.48041500  |
| Co   | -0.54488200 | -0.20101800 | 0.85062200  | C    | -1.16849800 | 2.53571000  | 0.19135900  |
| C    | 0.75140500  | -1.10140800 | -1.81198000 | O    | -1.78077200 | 3.59020500  | -0.00662800 |
| C    | 0.05134900  | -0.10665400 | -2.36428600 | N    | -1.68378000 | 1.26729100  | 0.05792800  |
| C    | 0.05375100  | 1.25237900  | -2.91441900 | C    | -3.00160700 | 0.94622600  | -0.18319400 |
| C    | -1.20238700 | 0.36912500  | -2.95487800 | C    | -3.26257800 | -0.46469900 | -0.20310300 |
| H    | 0.57932500  | 1.44593600  | -3.84821500 | C    | -4.07054200 | 1.81036800  | -0.42249300 |
| H    | 0.05785200  | 2.08799900  | -2.21697400 | C    | -4.56435700 | -0.97835000 | -0.46087600 |



|    |             |             |             |      |             |                         |
|----|-------------|-------------|-------------|------|-------------|-------------------------|
| C  | -5.35960400 | 1.29107100  | -0.66962900 |      |             |                         |
| H  | -3.88923500 | 2.87548900  | -0.41707000 | 22_T |             |                         |
| C  | -2.36242200 | -2.60054800 | 0.02535800  | C    | -3.95663000 | 0.49104200 1.64965600   |
| C  | -4.70714300 | -2.38909100 | -0.46454200 | C    | -3.79517400 | -0.68113400 2.39783300  |
| C  | -5.62205200 | -0.06437400 | -0.69484700 | C    | -2.53496900 | -1.26666700 2.51877600  |
| H  | -6.16862200 | 1.99368300  | -0.84880100 | C    | -1.44568800 | -0.66114900 1.89145200  |
| C  | -3.61629800 | -3.19555100 | -0.22310800 | C    | -1.60587000 | 0.50988200 1.13976100   |
| H  | -1.48130500 | -3.19856100 | 0.23569500  | C    | -2.86307400 | 1.09146600 1.01338800   |
| H  | -5.68488700 | -2.82174400 | -0.65715600 | H    | -4.94287900 | 0.93643000 1.55111400   |
| H  | -6.62082700 | -0.44187800 | -0.88935800 | H    | -4.65449900 | -1.13475300 2.88338000  |
| H  | -3.70390400 | -4.27631600 | -0.21833000 | H    | -2.38094800 | -2.18027400 3.08565400  |
| N  | -2.19546700 | -1.28746400 | 0.02793200  | H    | -3.00533700 | 1.98169900 0.41012700   |
| Co | -0.54876900 | -0.18604100 | 0.46087700  | C    | -0.06580300 | -1.20932400 1.94209800  |
| C  | 0.69971400  | -1.11034400 | -1.45729600 | O    | 0.26866400  | -2.24234200 2.52169600  |
| C  | -0.07742900 | -0.09943800 | -1.92234900 | N    | 0.77634000  | -0.37846300 1.22150500  |
| C  | -0.02269800 | 1.14204800  | -2.70326800 | C    | 2.15102700  | -0.53224200 1.10329300  |
| C  | -1.20125200 | 0.16585300  | -2.83351200 | C    | 2.75867500  | 0.38069300 0.18570400   |
| H  | 0.70731200  | 1.20656200  | -3.50765700 | C    | 2.97512500  | -1.42814700 1.77516400  |
| H  | -0.23626900 | 2.08551500  | -2.21092400 | C    | 4.15697400  | 0.37197600 -0.06097600  |
| H  | -2.15195700 | 0.50971900  | -2.44455600 | C    | 4.37077000  | -1.42356800 1.53880800  |
| H  | -1.27433100 | -0.45632000 | -3.72327700 | H    | 2.53619700  | -2.12461300 2.47447500  |
| C  | -0.17939500 | -1.30997800 | 2.45729100  | C    | 2.40939500  | 2.13699700 -1.30883100  |
| O  | 0.40389100  | -1.68264900 | 1.38578200  | C    | 4.64703900  | 1.31254100 -0.99885600  |
| O  | -0.96516700 | -0.31009500 | 2.35104900  | C    | 4.96465700  | -0.55917200 0.64381500  |
| C  | 0.07076500  | -1.97408600 | 3.77315100  | H    | 4.98421000  | -2.13457500 2.08416800  |
| H  | 0.98215500  | -1.54892800 | 4.20865200  | C    | 3.78065100  | 2.18796600 -1.62186000  |
| H  | -0.75922600 | -1.79433100 | 4.45848500  | H    | 1.69065800  | 2.81348000 -1.76008400  |
| H  | 0.22818600  | -3.04580300 | 3.63275800  | H    | 5.71076100  | 1.33783300 -1.21755600  |
| H  | 0.22907500  | -2.08175900 | -1.31861800 | H    | 6.03611300  | -0.57308500 0.47249900  |
| C  | 2.13580800  | -1.07111500 | -1.20944300 | H    | 4.13701500  | 2.91685900 -2.34073200  |
| C  | 2.76635000  | -2.19925300 | -0.64865200 | N    | 1.92239100  | 1.26277700 -0.44011400  |
| C  | 2.93083600  | 0.04642800  | -1.51170300 | Co   | 0.03373700  | 1.08013100 0.30096700   |
| C  | 4.12835100  | -2.21120800 | -0.40002100 | C    | 0.89516600  | -1.54062600 -2.05425200 |
| H  | 2.16669100  | -3.06723900 | -0.39461700 | C    | 1.56008400  | -2.55811800 -1.51428900 |
| C  | 4.30043000  | 0.04621100  | -1.27572600 | C    | 1.55159600  | -3.72129700 -0.62267600 |
| H  | 2.46906600  | 0.93821800  | -1.91576700 | C    | 2.83766100  | -3.24759800 -1.32178300 |
| C  | 4.90802600  | -1.08477200 | -0.71096500 | H    | 1.10186700  | -4.65053900 -0.97035100 |
| H  | 4.61564200  | -3.07640100 | 0.03678700  | H    | 1.44832100  | -3.54557800 0.44680600  |
| H  | 4.87884400  | 0.92996600  | -1.51298700 | H    | 3.60302600  | -2.77332800 -0.71214400 |
| O  | 6.23130100  | -1.18432100 | -0.42957400 | H    | 3.22742700  | -3.86684900 -2.12873000 |
| C  | 7.06052800  | -0.05736600 | -0.69427800 | C    | -0.44759800 | 3.46444100 0.29214500   |
| H  | 8.06618600  | -0.34549500 | -0.38433600 | O    | -0.67459300 | 2.64332300 -0.67684000  |
| H  | 7.07072300  | 0.19336800  | -1.76183100 | O    | 0.07048400  | 3.02672000 1.35144100   |
| H  | 6.74226600  | 0.81975400  | -0.11786800 | C    | -0.84289400 | 4.90656200 0.13200100   |

|        |             |             |             |        |             |             |             |
|--------|-------------|-------------|-------------|--------|-------------|-------------|-------------|
| H      | -1.92481900 | 4.99097700  | 0.28430500  | C      | -4.82596700 | -1.08216800 | 1.01788600  |
| H      | -0.33580600 | 5.52827300  | 0.87101100  | H      | -3.87220800 | 0.83674700  | 1.46140400  |
| H      | -0.62148100 | 5.25564300  | -0.87933300 | H      | -5.44474900 | -3.04619800 | 0.41136300  |
| H      | 1.44290800  | -0.84006600 | -2.68389500 | H      | -3.93888100 | -4.55523700 | -1.04891300 |
| C      | -0.53230800 | -1.25384100 | -1.87927100 | H      | -5.73518200 | -0.84960800 | 1.56083700  |
| C      | -1.07574700 | -0.07417700 | -2.42515300 | N      | -2.65880200 | -0.35812200 | 0.32268900  |
| C      | -1.41390400 | -2.12774700 | -1.22034000 | Co     | -1.09553100 | 0.79190700  | 0.18001900  |
| C      | -2.43131600 | 0.21270200  | -2.33318500 | C      | 0.88198600  | 0.79738300  | 1.49676300  |
| H      | -0.42121200 | 0.62188500  | -2.94190300 | C      | -0.32228500 | 0.07511900  | 1.79803200  |
| C      | -2.77404900 | -1.85561000 | -1.12626600 | C      | -0.51181900 | -1.23906500 | 2.46363900  |
| H      | -1.02790700 | -3.03878800 | -0.77812300 | C      | -1.04806600 | 0.04185600  | 3.09640700  |
| C      | -3.29338400 | -0.67936200 | -1.68544800 | H      | 0.35225200  | -1.71112700 | 2.92528600  |
| H      | -2.83897700 | 1.12865600  | -2.74648600 | H      | -1.23417300 | -1.94058700 | 2.05660900  |
| H      | -3.41679400 | -2.55198300 | -0.60307800 | H      | -2.12313000 | 0.19331800  | 3.10194200  |
| O      | -4.60595400 | -0.32027600 | -1.64297400 | H      | -0.53986700 | 0.42571500  | 3.97916700  |
| C      | -5.52578400 | -1.23549900 | -1.06232400 | C      | -2.34942300 | 2.78246700  | -0.15719100 |
| H      | -6.50825000 | -0.76661200 | -1.14313600 | O      | -1.94942000 | 2.36920700  | 0.99264900  |
| H      | -5.53803000 | -2.18975000 | -1.60435700 | O      | -2.08757400 | 2.07077500  | -1.16789400 |
| H      | -5.30014400 | -1.42002700 | -0.00636200 | C      | -3.06431700 | 4.09796600  | -0.27591200 |
| TS15_S |             |             |             | H      | -2.31538200 | 4.89579200  | -0.34128300 |
| C      | 1.80955400  | 3.73846800  | -1.04489600 | H      | -3.67385900 | 4.12262900  | -1.18093400 |
| C      | 2.32407800  | 3.04407500  | -2.14505700 | H      | -3.68051300 | 4.28321900  | 0.60691300  |
| C      | 1.98354500  | 1.70572000  | -2.34794900 | C      | 2.17681900  | 0.14147300  | 1.24428600  |
| C      | 1.14813800  | 1.05878700  | -1.44038700 | C      | 3.35919500  | 0.89470800  | 1.37247900  |
| C      | 0.65269000  | 1.73907200  | -0.30670000 | C      | 2.28315300  | -1.19846900 | 0.84730700  |
| C      | 0.98435400  | 3.08660800  | -0.12678100 | C      | 4.59785100  | 0.33087200  | 1.12521200  |
| H      | 2.06318000  | 4.78442300  | -0.89596400 | H      | 3.29339200  | 1.94211000  | 1.65285100  |
| H      | 2.98135800  | 3.54965000  | -2.84628400 | C      | 3.52235500  | -1.77510600 | 0.58090100  |
| H      | 2.34156200  | 1.15216300  | -3.21039500 | H      | 1.38758600  | -1.79182900 | 0.71982500  |
| H      | 0.61185700  | 3.62278900  | 0.74197300  | C      | 4.68883200  | -1.01158200 | 0.71873600  |
| C      | 0.67454500  | -0.33502000 | -1.69316900 | H      | 5.51151700  | 0.90717700  | 1.22454100  |
| O      | 1.18421200  | -1.09438500 | -2.52374900 | H      | 3.56680700  | -2.80847800 | 0.26123500  |
| N      | -0.41823900 | -0.59363500 | -0.91357100 | H      | 0.96684200  | 1.75631800  | 1.99910200  |
| C      | -1.23590100 | -1.69731100 | -1.02720500 | O      | 5.94290600  | -1.47383100 | 0.48543100  |
| C      | -2.47578100 | -1.54612500 | -0.33179300 | C      | 6.08840500  | -2.81067800 | 0.01761700  |
| C      | -1.01263200 | -2.88569400 | -1.71890800 | H      | 7.15931500  | -2.96345600 | -0.12530800 |
| C      | -3.46512500 | -2.56550600 | -0.32869300 | H      | 5.71603900  | -3.53678500 | 0.75056500  |
| C      | -1.99624900 | -3.89997900 | -1.70840800 | H      | 5.57093300  | -2.96017300 | -0.93745000 |
| H      | -0.08925500 | -3.00681900 | -2.26719200 | TS15_T |             |             |             |
| C      | -3.79119200 | -0.12594100 | 0.96903400  | C      | 1.68210400  | 3.83908900  | -1.13689700 |
| C      | -4.66192900 | -2.29367800 | 0.38141400  | C      | 2.25053200  | 3.13594400  | -2.20249600 |
| C      | -3.19542300 | -3.76469800 | -1.03667000 | C      | 1.98703400  | 1.77395800  | -2.35926600 |
| H      | -1.79413700 | -4.81638900 | -2.25568500 | C      | 1.17222600  | 1.10642100  | -1.44623300 |

|    |             |             |             |      |             |             |             |
|----|-------------|-------------|-------------|------|-------------|-------------|-------------|
| C  | 0.64477700  | 1.80404600  | -0.33977400 | C    | 4.61357100  | 0.39458500  | 1.10297500  |
| C  | 0.88930400  | 3.17139700  | -0.19960700 | H    | 3.35646900  | 2.05635000  | 1.58911900  |
| H  | 1.87055100  | 4.90291500  | -1.02240100 | C    | 3.48230100  | -1.71098800 | 0.68469800  |
| H  | 2.88506500  | 3.65187600  | -2.91687300 | H    | 1.35195100  | -1.67500800 | 0.86843200  |
| H  | 2.38003700  | 1.21255200  | -3.20134400 | C    | 4.66712600  | -0.96694900 | 0.75847500  |
| H  | 0.47906600  | 3.71271600  | 0.64824900  | H    | 5.54085300  | 0.95542800  | 1.15154900  |
| C  | 0.76057100  | -0.31304900 | -1.70480900 | H    | 3.49761900  | -2.75806500 | 0.41007700  |
| O  | 1.36213300  | -1.05610400 | -2.48679500 | H    | 1.02066400  | 1.94241300  | 1.97773200  |
| N  | -0.38257800 | -0.58795700 | -1.00778100 | O    | 5.90519500  | -1.46654200 | 0.51655900  |
| C  | -1.11861200 | -1.75039300 | -1.08124400 | C    | 6.01010500  | -2.82467100 | 0.10238200  |
| C  | -2.36174400 | -1.69933000 | -0.35768000 | H    | 5.46612200  | -3.00187600 | -0.83306200 |
| C  | -0.80868200 | -2.92683400 | -1.75969800 | H    | 7.07361100  | -3.00759200 | -0.05923100 |
| C  | -3.25527700 | -2.80659400 | -0.34530100 | H    | 5.64030400  | -3.51104800 | 0.87399700  |
| C  | -1.69712200 | -4.02534300 | -1.73186600 |      |             |             |             |
| H  | 0.11648000  | -2.97212800 | -2.31739900 |      |             |             |             |
| C  | -3.80167200 | -0.41880500 | 0.96180000  | 23_Q |             |             |             |
| C  | -4.46823000 | -2.65017800 | 0.37057900  | C    | -1.79886400 | 3.65007100  | 1.97993600  |
| C  | -2.89459500 | -3.98499700 | -1.04901100 | C    | -1.86317300 | 2.93418100  | 0.79044100  |
| H  | -1.42206900 | -4.92483300 | -2.27539300 | C    | -1.30543900 | 1.65209300  | 0.66080300  |
| C  | -4.74703100 | -1.46200000 | 1.01152700  | C    | -0.66670000 | 1.09023300  | 1.78237400  |
| H  | -3.96860700 | 0.53314900  | 1.45572200  | C    | -0.62864700 | 1.80866700  | 2.98828300  |
| H  | -5.17486000 | -3.47489600 | 0.39990400  | C    | -1.17693000 | 3.08107200  | 3.09257200  |
| H  | -3.57120600 | -4.83371400 | -1.04685700 | H    | -2.23488100 | 4.64288900  | 2.04014500  |
| H  | -5.67363600 | -1.31702800 | 1.55546400  | H    | -2.36556700 | 3.36917700  | -0.06954600 |
| N  | -2.65444000 | -0.54165000 | 0.31247300  | H    | -0.14791100 | 1.35216000  | 3.84813500  |
| Co | -1.14247400 | 0.80292200  | 0.15775300  | H    | -1.12080100 | 3.62305600  | 4.03173800  |
| C  | 0.91970100  | 0.95676700  | 1.53454000  | C    | -0.01108000 | -0.27216000 | 1.84892400  |
| C  | -0.28808800 | 0.27353100  | 1.87392300  | O    | -0.54267000 | -1.16660700 | 2.51600500  |
| C  | -0.53177200 | -0.99695200 | 2.60498900  | N    | 1.18514800  | -0.34905300 | 1.19216100  |
| C  | -1.08484100 | 0.32565100  | 3.12600700  | C    | -1.51976100 | 0.96692600  | -0.69135500 |
| H  | 0.31664300  | -1.44098400 | 3.12050800  | C    | 1.97544400  | -1.49213700 | 1.20254600  |
| H  | -1.24095100 | -1.71719300 | 2.20964700  | C    | 2.99659600  | -1.52813100 | 0.19359700  |
| H  | -2.15554600 | 0.48601800  | 3.05698700  | C    | 1.91048300  | -2.56983400 | 2.08456600  |
| H  | -0.61949000 | 0.77619900  | 4.00038000  | C    | 3.92855200  | -2.60201700 | 0.11278300  |
| C  | -2.59034700 | 2.79156500  | -0.14109900 | C    | 2.83742300  | -3.63220400 | 1.99952200  |
| O  | -2.30224300 | 2.46429800  | 1.05046600  | H    | 1.13570200  | -2.57984500 | 2.83661500  |
| O  | -2.14229200 | 2.09817200  | -1.11101700 | C    | 3.94158400  | -0.47004500 | -1.66672000 |
| C  | -3.41866700 | 4.01919000  | -0.42517300 | C    | 4.89725400  | -2.54102200 | -0.91815800 |
| H  | -2.74308500 | 4.87208400  | -0.55874700 | C    | 3.83376000  | -3.66338200 | 1.04754600  |
| H  | -3.99016800 | 3.89483100  | -1.34738200 | H    | 2.75374000  | -4.44538000 | 2.71465400  |
| H  | -4.08542100 | 4.23840500  | 0.41129500  | C    | 4.90985100  | -1.48115200 | -1.80115400 |
| C  | 2.19362800  | 0.26257800  | 1.29160100  | H    | 3.89875600  | 0.38103800  | -2.33838400 |
| C  | 3.39361600  | 0.99613400  | 1.35517700  | H    | 5.62657100  | -3.34152800 | -1.00483700 |
| C  | 2.26228000  | -1.09557100 | 0.95210600  | H    | 4.54048400  | -4.48535500 | 0.99530600  |
|    |             |             |             | H    | 5.64332700  | -1.41668200 | -2.59678600 |

|      |             |             |             |    |             |             |             |
|------|-------------|-------------|-------------|----|-------------|-------------|-------------|
| N    | 3.02521000  | -0.49994800 | -0.70669200 | C  | 0.25201700  | -0.41273800 | 1.74943000  |
| C    | -0.36968200 | 0.08802500  | -1.18019500 | O  | 0.69230200  | 0.04588200  | 2.81328000  |
| C    | -0.27397400 | -0.43780400 | -2.57883200 | N  | -0.32434200 | 0.34271600  | 0.77010400  |
| C    | -0.41855100 | -1.38500800 | -1.39840600 | C  | 1.15723800  | -1.81134600 | -0.91106000 |
| H    | 0.68099600  | -0.42302200 | -3.09910100 | C  | -0.48415300 | 1.71869400  | 0.97355200  |
| H    | -1.13319000 | -0.27843700 | -3.22886200 | C  | -1.68698700 | 2.27451100  | 0.44187700  |
| H    | -1.36782300 | -1.89112100 | -1.24801500 | C  | 0.39033800  | 2.57838400  | 1.62836000  |
| H    | 0.44921100  | -1.98529400 | -1.13627300 | C  | -2.00895900 | 3.65301500  | 0.59321900  |
| C    | 2.22297700  | 3.07792200  | -0.91992800 | C  | 0.08076700  | 3.95040800  | 1.76083800  |
| O    | 1.80817600  | 2.69930000  | 0.22991200  | H  | 1.30346200  | 2.18556600  | 2.04991900  |
| O    | 2.25633400  | 2.22979800  | -1.86457600 | C  | -3.66009100 | 1.84438300  | -0.71758600 |
| C    | 2.65361600  | 4.50349400  | -1.12091800 | C  | -3.24172700 | 4.08721400  | 0.04461200  |
| H    | 2.99380300  | 4.66950000  | -2.14346700 | C  | -1.08883500 | 4.49225200  | 1.26841600  |
| H    | 1.81332300  | 5.16782900  | -0.89606300 | H  | 0.79177500  | 4.59082300  | 2.27474100  |
| H    | 3.45557100  | 4.74486700  | -0.41659400 | C  | -4.06634900 | 3.18981200  | -0.59904600 |
| Co   | 1.47756700  | 0.80736800  | -0.42521600 | H  | -4.26649900 | 1.10963000  | -1.23738900 |
| H    | -1.59222600 | 1.78320500  | -1.41782700 | H  | -3.52464300 | 5.13193700  | 0.13849100  |
| C    | -2.85203400 | 0.22530800  | -0.73316300 | H  | -1.31467900 | 5.54734500  | 1.38655300  |
| C    | -3.70502700 | 0.38067400  | -1.83492300 | H  | -5.01482300 | 3.49942300  | -1.02352900 |
| C    | -3.23806100 | -0.65589800 | 0.28201900  | N  | -2.51394300 | 1.41016000  | -0.21748400 |
| C    | -4.90548200 | -0.31486100 | -1.92235400 | C  | -0.12492000 | -1.20821600 | -1.51624100 |
| H    | -3.42798700 | 1.06376100  | -2.63374300 | C  | -0.36125800 | -1.32368000 | -2.97401300 |
| C    | -4.43954400 | -1.36163200 | 0.20924300  | C  | -0.15754900 | 0.07054700  | -2.36856400 |
| H    | -2.59754400 | -0.80537300 | 1.14564900  | H  | -1.35638900 | -1.52187400 | -3.35603600 |
| C    | -5.28111900 | -1.19409000 | -0.89806800 | H  | 0.44797300  | -1.73427900 | -3.57620000 |
| H    | -5.56924400 | -0.18897000 | -2.77157200 | H  | 0.76123600  | 0.63435900  | -2.47586800 |
| H    | -4.70681500 | -2.03242700 | 1.01651200  | H  | -1.05379100 | 0.70106500  | -2.41253300 |
| O    | -6.47286500 | -1.83301800 | -1.06697600 | C  | -3.30167900 | -1.73224000 | -0.61501200 |
| C    | -6.89132200 | -2.73754100 | -0.05368600 | O  | -2.56592900 | -1.53196100 | 0.40860300  |
| H    | -7.02203300 | -2.23265500 | 0.91168900  | O  | -2.98765400 | -1.08048100 | -1.66617200 |
| H    | -7.85365600 | -3.13431000 | -0.38221300 | C  | -4.43972900 | -2.70152300 | -0.58385300 |
| H    | -6.18331700 | -3.56726900 | 0.06668200  | H  | -5.22927500 | -2.38052600 | -1.26637900 |
|      |             |             |             | H  | -4.07499800 | -3.68000400 | -0.91656900 |
| 23_S |             |             |             | H  | -4.82668900 | -2.80512300 | 0.43137900  |
| C    | 0.55467600  | -4.69996000 | 1.48932500  | Co | -1.48096600 | -0.30815300 | -0.59773600 |
| C    | 0.89788200  | -3.93825600 | 0.37480800  | H  | 1.45185300  | -2.60120300 | -1.61101600 |
| C    | 0.79272700  | -2.54053100 | 0.37220600  | C  | 2.36938400  | -0.88052400 | -0.84278200 |
| C    | 0.33336500  | -1.90270600 | 1.54081600  | C  | 2.97232800  | -0.48802900 | -2.05237600 |
| C    | 0.02274600  | -2.67408600 | 2.66974900  | C  | 2.96088200  | -0.42914800 | 0.33738600  |
| C    | 0.11067300  | -4.06171700 | 2.64729400  | C  | 4.07228200  | 0.35734200  | -2.08459600 |
| H    | 0.64173800  | -5.78207200 | 1.45418800  | H  | 2.57699300  | -0.86031300 | -2.99380100 |
| H    | 1.25997800  | -4.43503000 | -0.52144500 | C  | 4.07051200  | 0.42229800  | 0.32709300  |
| H    | -0.28801700 | -2.15625900 | 3.57027400  | H  | 2.57657700  | -0.73388900 | 1.30067600  |
| H    | -0.15510100 | -4.63843400 | 3.52825500  | C  | 4.62657100  | 0.83159600  | -0.88708600 |

H 4.52602700 0.65401900 -3.02473100  
H 4.48765800 0.74768000 1.27230400  
O 5.70047200 1.66206100 -1.01153200  
C 6.29517000 2.15528500 0.18084500  
H 6.68992100 1.34233700 0.80335400  
H 7.12045800 2.79610900 -0.13510500  
H 5.58587800 2.74847700 0.77191800

23\_T

C -1.87560300 3.67861300 1.87502800  
C -1.87924800 2.92982200 0.70434600  
C -1.30253200 1.65069800 0.63824100  
C -0.70200600 1.13028300 1.80159200  
C -0.73195900 1.88058100 2.98980600  
C -1.30148300 3.14678600 3.03200200  
H -2.32411700 4.66747700 1.88757900  
H -2.35064400 3.33077900 -0.18867500  
H -0.28811400 1.45103900 3.88209400  
H -1.29762700 3.71459300 3.95736400  
C 0.00042300 -0.20367100 1.92784100  
O -0.41187100 -1.03623200 2.73939100  
N 1.13932100 -0.30313500 1.17411800  
C -1.47129300 0.90543700 -0.68651700  
C 2.00110900 -1.39746800 1.22431800  
C 2.94629200 -1.47863500 0.14664700  
C 2.05598600 -2.38041700 2.20801100  
C 3.92779000 -2.50981100 0.09959300  
C 3.03177000 -3.40087000 2.15305400  
H 1.34030500 -2.35184800 3.01582200  
C 3.70230300 -0.55593600 -1.85334600  
C 4.81821200 -2.50346300 -1.00260800  
C 3.95645400 -3.47778800 1.13453400  
H 3.04361700 -4.14274200 2.94622700  
C 4.71196400 -1.53156700 -1.97347500  
H 3.58135100 0.22446600 -2.59921900  
H 5.58146900 -3.27354800 -1.06980400  
H 4.70064200 -4.26739700 1.10590800  
H 5.38375100 -1.50562200 -2.82406900  
N 2.85472800 -0.53810900 -0.83763000  
C -0.30419600 -0.00890200 -1.06678200  
C -0.14841500 -0.55863800 -2.45218100  
C -0.38921800 -1.48231800 -1.27184700  
H 0.83501500 -0.57940200 -2.91311200  
H -0.96361200 -0.37164200 -3.14846300

H -1.36158900 -1.95320300 -1.16805500  
H 0.44332600 -2.10120300 -0.95264900  
C 2.36665700 2.93230600 -0.95312000  
O 2.84296400 2.36612600 0.06367900  
O 1.39648600 2.35906200 -1.58819000  
C 2.87238700 4.25716200 -1.45173900  
H 3.09789000 4.19203500 -2.52017200  
H 2.08677500 5.01002000 -1.32815200  
H 3.75994700 4.56489000 -0.89779000  
Co 1.32927500 0.81118400 -0.37584400  
H -1.49801900 1.68369700 -1.45512400  
C -2.81043900 0.17984600 -0.73747100  
C -3.63304400 0.30510700 -1.86518700  
C -3.23648100 -0.65306100 0.30165200  
C -4.84293300 -0.37387700 -1.95437700  
H -3.32388200 0.95043200 -2.68329700  
C -4.44774100 -1.34130400 0.22872200  
H -2.61958000 -0.77628900 1.18637100  
C -5.25939200 -1.20366900 -0.90499300  
H -5.48324000 -0.27197100 -2.82451900  
H -4.74649400 -1.97412700 1.05530000  
O -6.45850300 -1.82712400 -1.07681600  
C -6.92334200 -2.67374300 -0.03395300  
H -7.06652100 -2.12095400 0.90301000  
H -7.88602700 -3.06409400 -0.36897100  
H -6.23814200 -3.51232200 0.14351700

TS16\_Q

C -0.62410800 -4.70260200 -0.51222000  
C -0.96733500 -3.73804500 0.43252100  
C -0.78452000 -2.37650900 0.17321500  
C -0.25257600 -1.99010800 -1.06893700  
C 0.05680500 -2.96208200 -2.03037700  
C -0.11195200 -4.31353800 -1.75204100  
H -0.76448900 -5.75531500 -0.28498600  
H -1.39200400 -4.03994400 1.38595100  
H 0.43739400 -2.63549800 -2.99210800  
H 0.15058800 -5.05949500 -2.49574500  
C -0.06084900 -0.56050300 -1.46622200  
O -0.30050500 -0.19317500 -2.61122600  
N 0.49102200 0.28954800 -0.49292200  
C -1.23861600 -1.34647200 1.18880300  
C 0.40200500 1.67160100 -0.68224500  
C 1.56217900 2.43193900 -0.35624600

|    |             |             |             |        |             |             |             |
|----|-------------|-------------|-------------|--------|-------------|-------------|-------------|
| C  | -0.78012500 | 2.34699800  | -1.04086200 | H      | -6.31941100 | 1.85751100  | -1.44050000 |
| C  | 1.53388500  | 3.86492700  | -0.40761000 |        |             |             |             |
| C  | -0.79907900 | 3.74007100  | -1.09204200 | TS16_S |             |             |             |
| H  | -1.66923200 | 1.77348700  | -1.27109600 | C      | 0.59093700  | -4.72182600 | 0.61205700  |
| C  | 3.81257400  | 2.42695200  | 0.33803600  | C      | 0.80129600  | -3.73567500 | -0.35071000 |
| C  | 2.73170600  | 4.53960100  | -0.05972000 | C      | 0.58843300  | -2.38879800 | -0.05079200 |
| C  | 0.32908500  | 4.50146200  | -0.78501000 | C      | 0.17076100  | -2.04241300 | 1.24110100  |
| H  | -1.71854000 | 4.24331500  | -1.37761300 | C      | -0.01617800 | -3.02824800 | 2.21537200  |
| C  | 3.86295400  | 3.81843500  | 0.31040200  | C      | 0.18201000  | -4.36848700 | 1.90076000  |
| H  | 4.66651800  | 1.82023500  | 0.61865900  | H      | 0.75122100  | -5.76575000 | 0.35864600  |
| H  | 2.75114600  | 5.62528500  | -0.07959600 | H      | 1.13886200  | -4.01083300 | -1.34624600 |
| H  | 0.29661200  | 5.58564300  | -0.83014500 | H      | -0.32188200 | -2.72329600 | 3.21020300  |
| H  | 4.78313300  | 4.32478700  | 0.58131500  | H      | 0.02204300  | -5.13433000 | 2.65346700  |
| N  | 2.68812900  | 1.75593800  | 0.01153400  | C      | -0.00278200 | -0.61983000 | 1.62699200  |
| C  | -0.21516500 | -0.25420600 | 1.35676400  | O      | 0.20332700  | -0.22488900 | 2.77064800  |
| C  | 0.72457600  | -0.13347300 | 2.51190400  | N      | -0.39688400 | 0.25145400  | 0.59675400  |
| C  | -0.32712500 | 0.92972200  | 2.20962600  | C      | 0.89717700  | -1.31579300 | -1.07030300 |
| H  | 1.76634200  | 0.16261400  | 2.38715100  | C      | -0.26968700 | 1.64569700  | 0.81256600  |
| H  | 0.57460100  | -0.81596800 | 3.34897200  | C      | -1.39392600 | 2.40054400  | 0.41122600  |
| H  | -1.19494300 | 1.03222900  | 2.85719000  | C      | 0.84414100  | 2.30106500  | 1.30236800  |
| H  | 0.03982100  | 1.87650700  | 1.81251800  | C      | -1.41493300 | 3.81562800  | 0.50595200  |
| C  | 3.93596500  | -2.12410700 | 0.37338200  | C      | 0.83147800  | 3.70995800  | 1.41026300  |
| O  | 2.72235600  | -2.29792600 | 0.01882900  | H      | 1.71759400  | 1.73832200  | 1.60426300  |
| O  | 4.36072600  | -0.93011200 | 0.52173100  | C      | -3.54014900 | 2.31241900  | -0.47407600 |
| C  | 4.84978200  | -3.29799700 | 0.57720600  | C      | -2.59873100 | 4.46964100  | 0.07510100  |
| H  | 5.37129900  | -3.50199100 | -0.36507100 | C      | -0.26350400 | 4.45983100  | 1.02451200  |
| H  | 5.60006000  | -3.07173100 | 1.33711900  | H      | 1.71091800  | 4.20935500  | 1.80478700  |
| H  | 4.27866000  | -4.18626300 | 0.85186200  | C      | -3.64978500 | 3.71738700  | -0.40457500 |
| Co | 2.44625600  | -0.25240000 | -0.01169700 | H      | -4.34561400 | 1.69236300  | -0.85108800 |
| C  | -2.63516800 | -0.79226000 | 0.91076200  | H      | -2.66484500 | 5.55207600  | 0.13040700  |
| C  | -3.14367800 | -0.58608700 | -0.37285000 | H      | -0.25519800 | 5.54172700  | 1.11388600  |
| C  | -3.44242800 | -0.42279100 | 1.99880300  | H      | -4.56847500 | 4.18756400  | -0.73753500 |
| C  | -4.40087800 | -0.00998200 | -0.57846600 | N      | -2.44261500 | 1.66927000  | -0.08518400 |
| H  | -2.57349100 | -0.88027500 | -1.24529400 | C      | -0.18733300 | -0.22332700 | -1.13909400 |
| C  | -4.69399600 | 0.14846900  | 1.81515800  | C      | -0.98291100 | -0.16163300 | -2.45892700 |
| H  | -3.08358600 | -0.59264400 | 3.01065700  | C      | 0.02794200  | 0.89899900  | -2.09235900 |
| C  | -5.18197900 | 0.36635600  | 0.51853000  | H      | -2.02731400 | 0.12313400  | -2.48288800 |
| H  | -4.75496700 | 0.13068500  | -1.59230100 | H      | -0.71618200 | -0.92444700 | -3.18888700 |
| H  | -5.31427200 | 0.42949200  | 2.66002400  | H      | 0.98311400  | 0.94543400  | -2.60414900 |
| H  | -1.29822700 | -1.86506700 | 2.15745300  | H      | -0.37424200 | 1.87475200  | -1.84607600 |
| O  | -6.41759100 | 0.93327300  | 0.43331100  | C      | -3.61033500 | -1.98088300 | -0.50567000 |
| C  | -6.95040900 | 1.17035200  | -0.86289000 | O      | -2.42193700 | -2.18008100 | -0.09905400 |
| H  | -7.07620100 | 0.23699000  | -1.42611900 | O      | -3.97353000 | -0.76957000 | -0.68440700 |
| H  | -7.92885700 | 1.62860700  | -0.70815800 | C      | -4.56171000 | -3.12074000 | -0.73011400 |

|        |             |             |             |      |             |             |             |
|--------|-------------|-------------|-------------|------|-------------|-------------|-------------|
| H      | -5.13018400 | -3.29548300 | 0.19081100  | C    | 4.51905500  | -2.96796300 | 0.60529900  |
| H      | -5.27028400 | -2.87778000 | -1.52498500 | H    | 3.78545100  | -3.94266800 | 2.36049700  |
| H      | -4.01368000 | -4.03344900 | -0.97195500 | C    | 4.91747800  | -0.58629900 | -2.25069800 |
| Co     | -2.16347200 | -0.19750400 | -0.08454100 | H    | 3.60530700  | 1.12436100  | -2.58151500 |
| C      | 2.31159400  | -0.75610300 | -0.90824400 | H    | 5.99456900  | -2.33548700 | -1.62318900 |
| C      | 2.91600400  | -0.50938400 | 0.32670900  | H    | 5.33470700  | -3.66608500 | 0.44383400  |
| C      | 3.05741100  | -0.46057200 | -2.06175100 | H    | 5.53277000  | -0.38655300 | -3.12087900 |
| C      | 4.19386100  | 0.04861800  | 0.42134800  | N    | 3.04404600  | 0.08051600  | -0.91013900 |
| H      | 2.41100200  | -0.76474000 | 1.24966300  | C    | -0.19087600 | -0.62567600 | -0.05145600 |
| C      | 4.32906400  | 0.09191400  | -1.98989500 | C    | 0.06036700  | -1.55176800 | -1.18739500 |
| H      | 2.63405500  | -0.67816800 | -3.03899800 | C    | -0.40567900 | -2.09097400 | 0.14694800  |
| C      | 4.90599300  | 0.36139100  | -0.74116200 | H    | 1.08806400  | -1.74962800 | -1.47323900 |
| H      | 4.62142200  | 0.21917300  | 1.40184600  | H    | -0.63490400 | -1.50671700 | -2.02143400 |
| H      | 4.89729700  | 0.31488200  | -2.88703400 | H    | -1.43059500 | -2.43249700 | 0.24117900  |
| H      | 0.87876300  | -1.80146200 | -2.05134500 | H    | 0.31546100  | -2.65409800 | 0.73043400  |
| O      | 6.15362300  | 0.90669300  | -0.76390400 | C    | 0.90677300  | 2.79643000  | -2.09199300 |
| C      | 6.78190100  | 1.17869500  | 0.48171300  | O    | 0.59289500  | 1.59863500  | -2.35406700 |
| H      | 6.92823600  | 0.26379800  | 1.06948700  | O    | 1.43096700  | 3.09464600  | -0.96601400 |
| H      | 7.75595100  | 1.60824900  | 0.24109700  | C    | 0.63023400  | 3.89873700  | -3.08866300 |
| H      | 6.20755400  | 1.90078200  | 1.07577200  | H    | -0.33552100 | 4.35809900  | -2.84749300 |
| TS16_T |             |             |             | H    | 1.39384500  | 4.67721700  | -3.02520500 |
| C      | -2.54647300 | 2.83250400  | 2.64806500  | H    | 0.57559400  | 3.50010800  | -4.10350900 |
| C      | -2.40755200 | 2.08871100  | 1.48225100  | Co   | 1.36513800  | 1.12773500  | -0.31478100 |
| C      | -1.36326700 | 1.16687800  | 1.31669700  | C    | -2.64149100 | -0.18948900 | -0.40332300 |
| C      | -0.43262800 | 1.01075800  | 2.36192600  | C    | -3.45791800 | -0.86133200 | 0.51069700  |
| C      | -0.60053600 | 1.74724900  | 3.54997000  | C    | -3.06301500 | -0.11362600 | -1.73845200 |
| C      | -1.63915200 | 2.65467200  | 3.69623100  | C    | -4.66078200 | -1.44891600 | 0.11662000  |
| H      | -3.36266100 | 3.54271800  | 2.74178200  | H    | -3.15955500 | -0.92035600 | 1.55298300  |
| H      | -3.12807500 | 2.20701400  | 0.67921900  | C    | -4.25812800 | -0.69207100 | -2.14824200 |
| H      | 0.11566300  | 1.58696900  | 4.34718300  | H    | -2.44391400 | 0.41120600  | -2.46104100 |
| H      | -1.74143700 | 3.22176600  | 4.61627400  | C    | -5.06597000 | -1.36673800 | -1.22230700 |
| C      | 0.76238900  | 0.10130600  | 2.35652300  | H    | -5.26953500 | -1.95758600 | 0.85410400  |
| O      | 1.26161600  | -0.26848700 | 3.41757100  | H    | -4.58925900 | -0.62886800 | -3.17959300 |
| N      | 1.31531100  | -0.21439700 | 1.11415500  | H    | -1.06639000 | 1.15209800  | -0.78419500 |
| C      | -1.29961400 | 0.41559800  | -0.00592500 | O    | -6.21876400 | -1.89871900 | -1.71441400 |
| C      | 2.37836300  | -1.14510300 | 1.02868900  | C    | -7.07446900 | -2.58683200 | -0.81189900 |
| C      | 3.26918100  | -0.97765600 | -0.07817200 | H    | -7.43291000 | -1.92768400 | -0.01122600 |
| C      | 2.58411500  | -2.22108900 | 1.88280100  | H    | -7.92667500 | -2.92582300 | -1.40343500 |
| C      | 4.34110700  | -1.88925000 | -0.29608500 | H    | -6.57759300 | -3.45805200 | -0.36665500 |
| C      | 3.65402600  | -3.11731500 | 1.66770100  | 24_Q |             |             |             |
| H      | 1.93250100  | -2.35889100 | 2.73293800  | C    | -1.25910600 | 4.84260100  | -0.86748500 |
| C      | 3.83508800  | 0.26907600  | -1.95343300 | C    | -1.92690700 | 3.71213300  | -1.34010600 |
| C      | 5.16889900  | -1.65829600 | -1.42428300 | C    | -1.42492000 | 2.43730300  | -1.08442400 |

|    |             |             |             |      |             |             |             |
|----|-------------|-------------|-------------|------|-------------|-------------|-------------|
| C  | -0.24511500 | 2.30425700  | -0.32745100 | C    | -3.11766300 | 0.84556800  | 0.76011200  |
| C  | 0.41837500  | 3.44152400  | 0.15636600  | C    | -5.12093300 | -0.77431900 | -0.28513400 |
| C  | -0.08379000 | 4.70788600  | -0.12190500 | H    | -4.27177600 | -0.33277000 | -2.19768900 |
| H  | -1.65474700 | 5.83074300  | -1.08224900 | C    | -4.03705700 | 0.24377700  | 1.62339200  |
| H  | -2.84339000 | 3.81803400  | -1.91346800 | H    | -2.34824500 | 1.47928200  | 1.18738500  |
| H  | 1.31967200  | 3.31484900  | 0.74493400  | C    | -5.04140900 | -0.57871700 | 1.10249000  |
| H  | 0.43490800  | 5.58877800  | 0.24254800  | H    | -5.91256900 | -1.40411600 | -0.67753500 |
| C  | 0.25463500  | 0.96455100  | 0.04183300  | H    | -3.95581700 | 0.42122000  | 2.68854500  |
| O  | 1.07724000  | 0.84318200  | 1.00771700  | H    | -2.58559500 | 1.39051900  | -2.53460500 |
| N  | -0.20948900 | -0.10204500 | -0.62586600 | O    | -5.98258600 | -1.21869700 | 1.84802400  |
| C  | -2.11068400 | 1.18076100  | -1.57087600 | C    | -5.92362100 | -1.07209900 | 3.26144900  |
| C  | 0.03996800  | -1.46374700 | -0.22617600 | H    | -6.06510000 | -0.02756300 | 3.56621300  |
| C  | 1.30417000  | -2.06570700 | -0.38880900 | H    | -6.74116700 | -1.67437500 | 3.66122500  |
| C  | -1.08613000 | -2.21473200 | 0.16396300  | H    | -4.97296200 | -1.44120800 | 3.66581500  |
| C  | 1.38883300  | -3.50013800 | -0.27038200 |      |             |             |             |
| C  | -0.97515200 | -3.58652400 | 0.34971000  | 24_S |             |             |             |
| H  | -2.03367400 | -1.70587200 | 0.29277800  | C    | 0.64336300  | -4.64562100 | -1.07692100 |
| C  | 3.58559500  | -1.97709200 | -1.07596800 | C    | -0.11829900 | -4.01266300 | -0.09677900 |
| C  | 2.62789000  | -4.12662500 | -0.58851200 | C    | -0.10811300 | -2.62003400 | 0.02397900  |
| C  | 0.24143200  | -4.22680300 | 0.11194000  | C    | 0.67382300  | -1.86313000 | -0.85882000 |
| H  | -1.84244900 | -4.16100100 | 0.66079400  | C    | 1.42287000  | -2.49778800 | -1.85596000 |
| C  | 3.70347300  | -3.34719200 | -1.04337300 | C    | 1.41609000  | -3.88450700 | -1.96038500 |
| H  | 4.40733500  | -1.33696800 | -1.38316500 | H    | 0.63358700  | -5.72880900 | -1.15509300 |
| H  | 2.70631000  | -5.20677300 | -0.52173200 | H    | -0.73172000 | -4.59983200 | 0.58174900  |
| H  | 0.32364600  | -5.30527800 | 0.21417000  | H    | 2.00729600  | -1.88838300 | -2.53763900 |
| H  | 4.63313400  | -3.81104400 | -1.35755500 | H    | 2.00729500  | -4.37412700 | -2.72863600 |
| N  | 2.43471700  | -1.30994500 | -0.67734300 | C    | 0.63399300  | -0.36737200 | -0.83669600 |
| C  | -1.01886900 | 0.14665900  | -1.82615600 | O    | 0.37878700  | 0.28175400  | -1.86464400 |
| C  | -0.27996200 | 0.16507800  | -3.14423200 | N    | 0.31901200  | 0.21320500  | 0.53843700  |
| C  | -1.22260800 | -0.96437700 | -2.80551000 | C    | -0.93886400 | -1.90431100 | 1.06628300  |
| H  | 0.78331700  | -0.04838800 | -3.10704300 | C    | -0.29068800 | 1.51232300  | 0.46656100  |
| H  | -0.57936300 | 0.90559400  | -3.87990900 | C    | 0.56895300  | 2.53577600  | 0.00328200  |
| H  | -2.18833900 | -1.00459500 | -3.29873800 | C    | -1.60000800 | 1.81343600  | 0.77133500  |
| H  | -0.79344800 | -1.93248700 | -2.57928500 | C    | 0.10020000  | 3.86163300  | -0.18256600 |
| C  | 4.81517300  | 1.27603200  | 1.41038100  | C    | -2.06966100 | 3.14025100  | 0.61344000  |
| O  | 4.33152600  | 1.59219400  | 0.27035600  | H    | -2.27206000 | 1.04363800  | 1.12558000  |
| O  | 4.25713600  | 0.34534600  | 2.08398200  | C    | 2.71385200  | 3.08530800  | -0.70823600 |
| C  | 5.99830200  | 2.01592100  | 1.96583400  | C    | 1.03166800  | 4.81289100  | -0.67276500 |
| H  | 5.63698400  | 2.91467400  | 2.47874300  | C    | -1.25202900 | 4.14394600  | 0.14086200  |
| H  | 6.53373100  | 1.39870100  | 2.68877800  | H    | -3.10392000 | 3.35622100  | 0.86211600  |
| H  | 6.66312800  | 2.33149800  | 1.15946800  | C    | 2.32588700  | 4.42273200  | -0.93658000 |
| Co | 2.87094000  | 0.15559800  | 0.56730900  | H    | 3.72499100  | 2.74299900  | -0.89927700 |
| C  | -3.17318600 | 0.64586200  | -0.62025400 | H    | 0.71284700  | 5.83815900  | -0.83565600 |
| C  | -4.19940600 | -0.16765400 | -1.12637600 | H    | -1.62719900 | 5.15483100  | 0.01387500  |



H 3.05897000 5.12549900 -1.31634500  
 N 1.86661800 2.17357000 -0.25065200  
 C -0.12225900 -0.72054100 1.59191900  
 C 0.82549600 -0.98375900 2.73354900  
 C -0.41242800 -0.15540500 2.95402400  
 H 1.77862000 -0.47019900 2.70589300  
 H 0.86614000 -1.99749600 3.11983500  
 H -1.25015500 -0.58126700 3.49744800  
 H -0.28455700 0.91168000 3.09750400  
 C 4.19905400 -0.91562800 0.20325500  
 O 3.12483100 -1.35905600 0.71930400  
 O 4.16324600 0.26548000 -0.28906900  
 C 5.43877100 -1.75607900 0.13085800  
 H 5.35685500 -2.42595200 -0.73287200  
 H 6.32475800 -1.13120400 0.00610900  
 H 5.52896500 -2.37483600 1.02654700  
 Co 2.25618600 0.36295400 0.17647800  
 C -2.31840000 -1.47816100 0.58186000  
 C -3.37085100 -1.38960500 1.50739200  
 C -2.56822200 -1.07025500 -0.73041700  
 C -4.61401800 -0.88599700 1.14644100  
 H -3.21090800 -1.71808600 2.53089300  
 C -3.81184600 -0.56148400 -1.11157100  
 H -1.78481300 -1.11758200 -1.47700500  
 C -4.84112700 -0.45844000 -0.17020400  
 H -5.42550000 -0.81957900 1.86396400  
 H -3.95790300 -0.24526100 -2.13694900  
 H -1.08251000 -2.58001100 1.91539600  
 O -6.08548200 0.03022200 -0.43216400  
 C -6.35615900 0.47918100 -1.75361800  
 H -6.25618100 -0.33206500 -2.48550700  
 H -7.38978900 0.82967000 -1.74752300  
 H -5.69687300 1.30742400 -2.04236900

24\_T

C -0.16295400 -4.82763900 -0.82497600  
 C -0.80597400 -4.03780400 0.12742600  
 C -0.57442900 -2.66235100 0.18598900  
 C 0.31018700 -2.07753500 -0.73747800  
 C 0.94150700 -2.87042200 -1.70731300  
 C 0.71197300 -4.24117100 -1.74525500  
 H -0.34532500 -5.89777500 -0.85229200  
 H -1.49840100 -4.48872000 0.83316800  
 H 1.60378500 -2.39168500 -2.42059400

H 1.20964500 -4.85280000 -2.49153600  
 C 0.55145100 -0.61147900 -0.75424100  
 O 0.87137400 0.01620000 -1.80937500  
 N 0.12911700 0.12507700 0.39934200  
 C -1.28119100 -1.77556200 1.18829000  
 C -0.20761200 1.50820700 0.26146300  
 C 0.81968800 2.44814400 -0.05488900  
 C -1.49193600 1.96342500 0.48739600  
 C 0.49348300 3.83270700 -0.17636900  
 C -1.80560200 3.33688300 0.38523900  
 H -2.26818700 1.25657400 0.74598600  
 C 3.06196100 2.87572800 -0.50830500  
 C 1.54124500 4.73004400 -0.50369800  
 C -0.84033900 4.25718900 0.04883200  
 H -2.82770800 3.65457200 0.56534500  
 C 2.82065200 4.25496400 -0.67199900  
 H 4.05888500 2.46180400 -0.62617900  
 H 1.31647500 5.78698400 -0.61380200  
 H -1.07850400 5.31278400 -0.04089100  
 H 3.64359900 4.91480300 -0.92265500  
 N 2.10583300 2.00685700 -0.21510300  
 C -0.31928100 -0.64426600 1.55864400  
 C 0.69373900 -0.91904600 2.64540100  
 C -0.42764700 0.06350200 2.87437100  
 H 1.69481000 -0.53194900 2.49544700  
 H 0.64881700 -1.88924600 3.13123500  
 H -1.25184400 -0.21756700 3.52217700  
 H -0.17976700 1.11867500 2.90318300  
 C 4.60581800 -0.96831200 0.19280500  
 O 3.63836300 -1.10066700 1.02193500  
 O 4.44125300 -0.32865600 -0.88701700  
 C 5.93444900 -1.60764400 0.51780200  
 H 5.83656000 -2.69507400 0.42743100  
 H 6.71384700 -1.26224500 -0.16282000  
 H 6.21239700 -1.39035300 1.55278500  
 Co 2.39534500 -0.01311400 -0.22388400  
 C -2.61985900 -1.24433900 0.69762600  
 C -3.59898900 -0.87456400 1.63400500  
 C -2.88371000 -1.00335700 -0.65216500  
 C -4.78071700 -0.26106700 1.24067100  
 H -3.42659900 -1.06315000 2.69005500  
 C -4.06703800 -0.38750500 -1.06751900  
 H -2.15849600 -1.28970400 -1.40562900  
 C -5.01989900 -0.00373200 -0.11814900

|   |             |             |             |
|---|-------------|-------------|-------------|
| H | -5.53564700 | 0.02494400  | 1.96575100  |
| H | -4.22862200 | -0.21194400 | -2.12384300 |
| H | -1.46033600 | -2.35315600 | 2.10087400  |
| O | -6.20009100 | 0.60974800  | -0.40841800 |
| C | -6.48015900 | 0.89890900  | -1.77224500 |
| H | -6.53231500 | -0.01484900 | -2.37713000 |
| H | -7.45464800 | 1.39021000  | -1.78220400 |
| H | -5.73146700 | 1.57499100  | -2.20382900 |

4s\_AQ\_S

|    |          |          |          |
|----|----------|----------|----------|
| C  | 0.33924  | 0.74841  | 2.13334  |
| C  | 0.01632  | 2.02961  | 1.68092  |
| C  | 0.43504  | 2.45087  | 0.41444  |
| C  | 1.17533  | 1.59379  | -0.39471 |
| C  | 1.48506  | 0.30176  | 0.0492   |
| C  | 1.06945  | -0.11497 | 1.31792  |
| H  | 0.01904  | 0.42029  | 3.11796  |
| H  | -0.55973 | 2.70015  | 2.31249  |
| H  | 0.18193  | 3.44626  | 0.06136  |
| H  | 1.50887  | 1.89866  | -1.37978 |
| H  | 1.31917  | -1.11658 | 1.64177  |
| C  | 2.34404  | -0.56939 | -0.80276 |
| N  | 2.30822  | -1.95445 | -0.57646 |
| O  | 3.14081  | -0.07174 | -1.5956  |
| C  | 3.5035   | -2.62855 | -0.46611 |
| C  | 3.41792  | -4.04729 | -0.55677 |
| C  | 4.76872  | -2.07694 | -0.23714 |
| C  | 4.57091  | -4.8796  | -0.448   |
| C  | 5.89695  | -2.90287 | -0.08816 |
| H  | 4.88391  | -1.00258 | -0.18999 |
| C  | 2.0466   | -5.85305 | -1.05674 |
| C  | 4.38125  | -6.26887 | -0.64719 |
| C  | 5.82452  | -4.27961 | -0.18854 |
| H  | 6.85678  | -2.4298  | 0.09927  |
| C  | 3.13357  | -6.74614 | -0.97338 |
| H  | 1.07319  | -6.2134  | -1.34678 |
| H  | 5.23266  | -6.93846 | -0.56589 |
| H  | 6.70739  | -4.90302 | -0.09424 |
| H  | 2.96075  | -7.79824 | -1.17023 |
| N  | 2.17551  | -4.55669 | -0.81538 |
| Co | 0.78883  | -3.13201 | -0.7601  |
| O  | 0.73455  | -3.32992 | 1.13686  |
| O  | -1.49983 | -3.09366 | 1.42275  |
| C  | -0.33681 | -3.17648 | 1.85145  |

|   |          |          |          |
|---|----------|----------|----------|
| O | -0.48649 | -1.74939 | -0.70235 |
| O | -0.1113  | -0.47582 | -2.54685 |
| C | -0.7404  | -0.77101 | -1.5344  |
| C | -1.97182 | 0.00827  | -1.09871 |
| H | -1.86964 | 0.31017  | -0.05382 |
| H | -2.10575 | 0.88538  | -1.73342 |
| H | -2.85474 | -0.63611 | -1.1708  |
| C | -0.08754 | -3.17726 | 3.34749  |
| H | -0.86569 | -2.60456 | 3.85595  |
| H | -0.14182 | -4.21327 | 3.70152  |
| H | 0.90123  | -2.78512 | 3.59319  |
| C | -2.5734  | -6.25649 | 2.70072  |
| C | -1.71025 | -7.24089 | 3.1842   |
| C | -0.65684 | -7.69961 | 2.38906  |
| C | -0.47166 | -7.17666 | 1.11275  |
| C | -1.31121 | -6.15745 | 0.64021  |
| C | -2.37067 | -5.70574 | 1.43645  |
| H | -3.40156 | -5.90868 | 3.30987  |
| H | -1.86159 | -7.65533 | 4.17645  |
| H | 0.01258  | -8.46966 | 2.75944  |
| H | 0.33015  | -7.54386 | 0.48285  |
| H | -3.03573 | -4.93347 | 1.0732   |
| C | -1.11053 | -5.67454 | -0.75468 |
| N | -1.06874 | -4.26652 | -0.9859  |
| H | -1.45104 | -3.69342 | -0.18635 |
| O | -0.94504 | -6.45572 | -1.67922 |
| C | -1.47163 | -3.89357 | -2.32651 |
| C | -0.47904 | -3.39178 | -3.20047 |
| C | -2.75415 | -4.08543 | -2.78668 |
| C | -0.78812 | -3.14342 | -4.56508 |
| C | -3.07955 | -3.80462 | -4.13427 |
| H | -3.5115  | -4.47553 | -2.1144  |
| C | 1.71312  | -2.65106 | -3.48073 |
| C | 0.25972  | -2.67124 | -5.39427 |
| C | -2.11529 | -3.36347 | -5.01273 |
| H | -4.09789 | -3.9595  | -4.47476 |
| C | 1.5065   | -2.44917 | -4.85975 |
| H | 2.6502   | -2.38534 | -3.00905 |
| H | 0.05971  | -2.47892 | -6.44408 |
| H | -2.35759 | -3.16825 | -6.05265 |
| H | 2.32547  | -2.07771 | -5.46419 |
| N | 0.75824  | -3.10798 | -2.69089 |

4s\_AQ\_T

|    |          |          |          |         |          |          |          |
|----|----------|----------|----------|---------|----------|----------|----------|
| C  | 2.69719  | 0.18624  | 3.86601  | H       | -0.44541 | -1.63553 | 3.84653  |
| C  | 3.86796  | 0.93302  | 4.01304  | C       | -4.7726  | 0.63199  | 2.86567  |
| C  | 4.79073  | 1.00276  | 2.96411  | C       | -5.51855 | -0.50905 | 2.56673  |
| C  | 4.54186  | 0.32823  | 1.77223  | C       | -5.43657 | -1.08137 | 1.29443  |
| C  | 3.35897  | -0.40536 | 1.61389  | C       | -4.60405 | -0.51783 | 0.33214  |
| C  | 2.44196  | -0.47862 | 2.66809  | C       | -3.82173 | 0.60434  | 0.63825  |
| H  | 1.98024  | 0.12827  | 4.6794   | C       | -3.92663 | 1.18849  | 1.90647  |
| H  | 4.06324  | 1.4592   | 4.94313  | H       | -4.84881 | 1.09246  | 3.84591  |
| H  | 5.70077  | 1.58429  | 3.07817  | H       | -6.17046 | -0.94469 | 3.31829  |
| H  | 5.24315  | 0.36818  | 0.94644  | H       | -6.026   | -1.96082 | 1.05309  |
| H  | 1.53286  | -1.05059 | 2.53442  | H       | -4.55242 | -0.93406 | -0.66729 |
| C  | 3.14397  | -1.15432 | 0.34226  | H       | -3.35017 | 2.07208  | 2.14693  |
| N  | 1.81841  | -1.48348 | 0.01094  | C       | -2.95429 | 1.16969  | -0.44376 |
| O  | 4.09628  | -1.52476 | -0.33689 | N       | -1.79889 | 1.79432  | -0.0515  |
| C  | 1.55812  | -2.75193 | -0.49155 | H       | -1.47557 | 1.73941  | 0.93495  |
| C  | 0.23531  | -2.92623 | -0.98896 | O       | -3.26689 | 1.05165  | -1.63307 |
| C  | 2.39968  | -3.86393 | -0.51349 | C       | -1.10556 | 2.60982  | -0.98729 |
| C  | -0.22994 | -4.16681 | -1.50473 | C       | -0.22616 | 2.04145  | -1.95129 |
| C  | 1.93401  | -5.1031  | -1.00141 | C       | -1.34537 | 3.96836  | -1.01012 |
| H  | 3.42066  | -3.77347 | -0.16999 | C       | 0.30072  | 2.87308  | -2.98549 |
| C  | -1.77393 | -1.85126 | -1.48952 | C       | -0.76613 | 4.80449  | -1.99041 |
| C  | -1.55126 | -4.19198 | -2.01476 | H       | -2.02093 | 4.38327  | -0.26932 |
| C  | 0.65428  | -5.27321 | -1.49175 | C       | 0.87971  | 0.18752  | -2.83746 |
| H  | 2.61966  | -5.94534 | -0.99504 | C       | 1.09701  | 2.26861  | -3.98815 |
| C  | -2.31044 | -3.04211 | -2.01769 | C       | 0.01958  | 4.26263  | -2.9794  |
| H  | -2.33056 | -0.92363 | -1.51519 | H       | -0.976   | 5.86887  | -1.97529 |
| H  | -1.94833 | -5.12045 | -2.4148  | C       | 1.35704  | 0.92115  | -3.93686 |
| H  | 0.3191   | -6.23088 | -1.87614 | H       | 1.15243  | -0.8543  | -2.71832 |
| H  | -3.31523 | -3.02895 | -2.42417 | H       | 1.49631  | 2.88579  | -4.78746 |
| N  | -0.5536  | -1.81432 | -0.97606 | H       | 0.43788  | 4.88282  | -3.76604 |
| Co | 0.30107  | -0.27382 | -0.11203 | H       | 1.96029  | 0.42339  | -4.68657 |
| O  | -0.74494 | -0.72691 | 1.44967  | N       | 0.13187  | 0.71971  | -1.88003 |
| O  | -1.09002 | 1.22305  | 2.54545  |         |          |          |          |
| C  | -0.97161 | -0.00895 | 2.51274  | 4s_AQ_Q |          |          |          |
| O  | 1.02529  | 1.22936  | 0.68004  | C       | 2.80392  | 0.30362  | 3.74821  |
| O  | 2.70015  | 1.57613  | -0.80106 | C       | 4.07503  | 0.85265  | 3.92035  |
| C  | 2.04866  | 1.89359  | 0.18828  | C       | 5.05301  | 0.68926  | 2.93188  |
| C  | 2.33918  | 3.14279  | 0.99797  | C       | 4.75823  | -0.02102 | 1.77387  |
| H  | 2.42339  | 2.88854  | 2.05709  | C       | 3.47754  | -0.5636  | 1.59387  |
| H  | 3.26087  | 3.608    | 0.64628  | C       | 2.50199  | -0.40178 | 2.5846   |
| H  | 1.50689  | 3.84614  | 0.89022  | H       | 2.04139  | 0.43684  | 4.50912  |
| C  | -1.17935 | -0.82914 | 3.772    | H       | 4.30644  | 1.41176  | 4.82239  |
| H  | -1.13639 | -0.18885 | 4.65454  | H       | 6.03982  | 1.12156  | 3.06681  |
| H  | -2.17197 | -1.29071 | 3.72065  | H       | 5.49598  | -0.15413 | 0.99056  |

|    |          |          |          |           |          |          |          |
|----|----------|----------|----------|-----------|----------|----------|----------|
| H  | 1.51143  | -0.81202 | 2.43336  | H         | -4.34033 | -1.06789 | -0.98691 |
| C  | 3.19808  | -1.31496 | 0.34959  | H         | -3.51484 | 1.79049  | 2.0999   |
| N  | 1.82458  | -1.54938 | 0.04714  | C         | -2.94671 | 1.14032  | -0.5393  |
| O  | 4.06667  | -1.72075 | -0.4074  | N         | -1.8903  | 1.86206  | -0.05028 |
| C  | 1.41218  | -2.78901 | -0.22644 | H         | -1.60117 | 1.76856  | 0.94726  |
| C  | 0.10167  | -2.91068 | -0.84217 | O         | -3.2066  | 1.07562  | -1.74549 |
| C  | 2.1348   | -3.98285 | 0.04464  | C         | -1.22324 | 2.7857   | -0.90031 |
| C  | -0.42047 | -4.1856  | -1.17377 | C         | -0.36477 | 2.32248  | -1.93826 |
| C  | 1.58822  | -5.23015 | -0.25731 | C         | -1.44047 | 4.13859  | -0.75417 |
| H  | 3.11683  | -3.91391 | 0.49469  | C         | 0.16671  | 3.25946  | -2.87328 |
| C  | -1.7082  | -1.81798 | -1.77135 | C         | -0.85438 | 5.07399  | -1.63852 |
| C  | -1.67177 | -4.22189 | -1.83249 | H         | -2.09373 | 4.47678  | 0.04358  |
| C  | 0.33895  | -5.34687 | -0.85571 | C         | 0.7018   | 0.56338  | -3.01044 |
| H  | 2.15546  | -6.12505 | -0.02345 | C         | 0.94467  | 2.7522   | -3.94391 |
| C  | -2.30762 | -3.03705 | -2.1407  | C         | -0.08852 | 4.64375  | -2.69654 |
| H  | -2.17499 | -0.86565 | -2.00261 | H         | -1.04282 | 6.13285  | -1.49294 |
| H  | -2.10843 | -5.17954 | -2.1     | C         | 1.18403  | 1.40227  | -4.03491 |
| H  | -0.06826 | -6.32402 | -1.0957  | H         | 0.95948  | -0.49116 | -2.99726 |
| H  | -3.25889 | -3.0269  | -2.66077 | H         | 1.34782  | 3.44363  | -4.67842 |
| N  | -0.54735 | -1.76312 | -1.12638 | H         | 0.33336  | 5.34979  | -3.40563 |
| Co | 0.33214  | -0.01052 | -0.1189  | H         | 1.77419  | 0.9805   | -4.84041 |
| O  | -0.6359  | -0.71626 | 1.50833  | N         | -0.03159 | 0.99696  | -1.99866 |
| O  | -1.21664 | 1.21386  | 2.53088  |           |          |          |          |
| C  | -1.01342 | -0.01443 | 2.52502  | TS2s_AQ_S |          |          |          |
| O  | 1.11268  | 1.63208  | 0.68299  | C         | 2.95934  | -0.09144 | 3.84657  |
| O  | 2.71167  | 1.22355  | -0.82069 | C         | 4.16619  | 0.60952  | 3.89755  |
| C  | 2.21877  | 1.92291  | 0.08425  | C         | 4.92551  | 0.77877  | 2.73527  |
| C  | 2.8967   | 3.19604  | 0.5523   | C         | 4.48085  | 0.24458  | 1.52943  |
| H  | 3.07206  | 3.14334  | 1.63082  | C         | 3.26172  | -0.44303 | 1.47113  |
| H  | 3.84258  | 3.34902  | 0.03035  | C         | 2.50432  | -0.61155 | 2.63511  |
| H  | 2.23252  | 4.04774  | 0.36975  | H         | 2.37511  | -0.23476 | 4.75113  |
| C  | -1.26046 | -0.81593 | 3.79309  | H         | 4.51681  | 1.0213   | 4.83975  |
| H  | -1.38073 | -0.15454 | 4.65284  | H         | 5.86271  | 1.32614  | 2.77303  |
| H  | -2.18096 | -1.39597 | 3.6623   | H         | 5.05464  | 0.3623   | 0.61779  |
| H  | -0.44888 | -1.527   | 3.97295  | H         | 1.5651   | -1.14514 | 2.57103  |
| C  | -4.82661 | 0.17943  | 2.64177  | C         | 2.85168  | -1.07825 | 0.18519  |
| C  | -5.45328 | -0.99618 | 2.22596  | N         | 1.49267  | -1.36613 | 0.00036  |
| C  | -5.27318 | -1.45437 | 0.91823  | O         | 3.7035   | -1.42494 | -0.63219 |
| C  | -4.46138 | -0.74341 | 0.03929  | C         | 1.15421  | -2.59276 | -0.52925 |
| C  | -3.79384 | 0.41393  | 0.46276  | C         | -0.15588 | -2.68924 | -1.08134 |
| C  | -4.00082 | 0.88392  | 1.76546  | C         | 1.93939  | -3.75037 | -0.54763 |
| H  | -4.9804  | 0.55274  | 3.64969  | C         | -0.63974 | -3.89314 | -1.67366 |
| H  | -6.08971 | -1.54629 | 2.9131   | C         | 1.43937  | -4.95205 | -1.08043 |
| H  | -5.77171 | -2.35939 | 0.5836   | H         | 2.9505   | -3.71678 | -0.16449 |

|    |          |          |          |         |          |          |          |
|----|----------|----------|----------|---------|----------|----------|----------|
| C  | -2.04211 | -1.49955 | -1.74116 | C       | -0.93161 | 4.49083  | -2.16637 |
| C  | -1.90817 | -3.83456 | -2.30139 | H       | -2.20815 | 3.95403  | -0.49757 |
| C  | 0.17881  | -5.04534 | -1.64067 | C       | 1.47139  | 0.16955  | -2.63266 |
| H  | 2.08213  | -5.82758 | -1.06171 | C       | 1.48425  | 2.21387  | -3.89907 |
| C  | -2.58872 | -2.64009 | -2.35969 | C       | 0.00279  | 4.06576  | -3.08579 |
| H  | -2.56212 | -0.55594 | -1.79663 | H       | -1.30647 | 5.50854  | -2.20498 |
| H  | -2.31704 | -4.73153 | -2.75752 | C       | 1.94218  | 0.92923  | -3.72186 |
| H  | -0.18158 | -5.97142 | -2.07586 | H       | 1.89541  | -0.79817 | -2.39862 |
| H  | -3.54345 | -2.55269 | -2.86537 | H       | 1.87149  | 2.83783  | -4.69918 |
| N  | -0.89265 | -1.53684 | -1.0792  | H       | 0.37241  | 4.73377  | -3.85736 |
| Co | 0.03595  | -0.08156 | -0.1119  | H       | 2.69704  | 0.50122  | -4.37077 |
| O  | -0.52507 | -0.6849  | 1.64855  | N       | 0.54642  | 0.63559  | -1.81283 |
| O  | -1.31926 | 1.32416  | 2.29115  |         |          |          |          |
| C  | -0.93882 | 0.13467  | 2.52857  | 5s_AQ_S |          |          |          |
| O  | 0.94605  | 1.29931  | 0.79487  | C       | -1.7671  | 2.08159  | 0.97582  |
| O  | 2.67463  | 1.90345  | -0.54967 | C       | -2.31806 | 3.33607  | 1.23793  |
| C  | 1.98003  | 2.02709  | 0.45471  | C       | -3.64549 | 3.46129  | 1.69635  |
| C  | 2.25268  | 3.10611  | 1.49172  | C       | -4.46133 | 2.367    | 1.90477  |
| H  | 2.37033  | 2.64936  | 2.4776   | C       | -3.95305 | 1.07279  | 1.6399   |
| H  | 3.15422  | 3.66099  | 1.22848  | C       | -2.61628 | 0.95258  | 1.16433  |
| H  | 1.39865  | 3.78957  | 1.54303  | N       | -2.07927 | -0.26457 | 0.85072  |
| C  | -0.99997 | -0.34003 | 3.95442  | C       | -2.78716 | -1.37259 | 1.02348  |
| H  | -0.25386 | 0.2101   | 4.53719  | C       | -4.10767 | -1.33928 | 1.50781  |
| H  | -1.9838  | -0.11333 | 4.37283  | C       | -4.68806 | -0.12596 | 1.80651  |
| H  | -0.79778 | -1.40908 | 4.02066  | N       | -0.44962 | 1.79313  | 0.62155  |
| C  | -5.58619 | 0.54928  | 2.20918  | H       | -4.02919 | 4.45889  | 1.88941  |
| C  | -5.32449 | -0.74367 | 2.66753  | H       | -5.48132 | 2.48009  | 2.25696  |
| C  | -4.25501 | -1.46197 | 2.13316  | H       | -5.71023 | -0.07454 | 2.17014  |
| C  | -3.43291 | -0.8893  | 1.16169  | H       | -4.64813 | -2.27117 | 1.62716  |
| C  | -3.68074 | 0.41214  | 0.71104  | H       | -2.30472 | -2.30553 | 0.76159  |
| C  | -4.78087 | 1.11562  | 1.22499  | C       | 0.29025  | 2.79759  | -0.00383 |
| H  | -6.42144 | 1.11377  | 2.61246  | C       | 1.76604  | 2.82623  | 0.23095  |
| H  | -5.95555 | -1.1904  | 3.43006  | C       | 2.57987  | 3.45285  | -0.7216  |
| H  | -4.05331 | -2.47416 | 2.47082  | C       | 2.34062  | 2.33566  | 1.40733  |
| H  | -2.60124 | -1.45673 | 0.7745   | C       | 3.95052  | 3.57014  | -0.50641 |
| H  | -4.9907  | 2.11277  | 0.85269  | C       | 3.70955  | 2.46777  | 1.63314  |
| C  | -2.90457 | 1.12413  | -0.36521 | C       | 4.5181   | 3.08169  | 0.67391  |
| N  | -1.51288 | 1.33621  | -0.18261 | H       | 1.70726  | 1.8584   | 2.14283  |
| H  | -1.33759 | 1.47471  | 1.07754  | H       | 4.57737  | 4.04303  | -1.25648 |
| O  | -3.51674 | 1.58493  | -1.32148 | H       | 4.1457   | 2.09122  | 2.5539   |
| C  | -0.98613 | 2.31242  | -1.10077 | H       | 5.58643  | 3.1791   | 0.84466  |
| C  | 0.02099  | 1.88495  | -1.99715 | O       | -0.22875 | 3.68055  | -0.69034 |
| C  | -1.43775 | 3.61302  | -1.18012 | H       | -1.7249  | 4.22516  | 1.07526  |
| C  | 0.50706  | 2.74313  | -3.01999 | C       | 0.4349   | -2.84421 | 0.20756  |

|    |          |          |          |
|----|----------|----------|----------|
| C  | 0.77065  | -4.16678 | -0.06464 |
| C  | 1.43592  | -4.94098 | 0.91428  |
| C  | 1.75786  | -4.446   | 2.16169  |
| C  | 1.41928  | -3.10766 | 2.48623  |
| C  | 0.77669  | -2.32315 | 1.49262  |
| N  | 0.41699  | -1.02475 | 1.73987  |
| C  | 0.61593  | -0.47524 | 2.92784  |
| C  | 1.23218  | -1.19787 | 3.96784  |
| C  | 1.64474  | -2.49423 | 3.74341  |
| N  | -0.24532 | -1.92787 | -0.58294 |
| H  | 1.6902   | -5.96751 | 0.66734  |
| H  | 2.2523   | -5.06507 | 2.90307  |
| H  | 2.13485  | -3.06101 | 4.52954  |
| H  | 1.38051  | -0.7146  | 4.92653  |
| H  | 0.28999  | 0.55002  | 3.05027  |
| C  | -1.00234 | -2.26914 | -1.67509 |
| C  | -1.85782 | -1.13125 | -2.15207 |
| C  | -3.19586 | -1.39191 | -2.46128 |
| C  | -1.3983  | 0.1975   | -2.12633 |
| C  | -4.07639 | -0.33325 | -2.68336 |
| C  | -2.28892 | 1.25714  | -2.33631 |
| C  | -3.63034 | 0.99161  | -2.60435 |
| H  | -0.32018 | 0.41456  | -2.08335 |
| H  | -5.11998 | -0.53945 | -2.90333 |
| H  | -1.92016 | 2.27621  | -2.27662 |
| H  | -4.3278  | 1.80916  | -2.75963 |
| O  | -1.08632 | -3.40356 | -2.1534  |
| H  | 0.50715  | -4.59106 | -1.0221  |
| Co | -0.2253  | -0.14602 | 0.17247  |
| C  | 2.15552  | 0.26804  | -1.43548 |
| O  | 1.63453  | -0.06025 | -0.28516 |
| O  | 1.54531  | 0.70663  | -2.41212 |
| C  | 3.65634  | 0.03945  | -1.47309 |
| H  | 2.12053  | 3.83304  | -1.62654 |
| H  | -3.53904 | -2.42084 | -2.49046 |
| H  | 4.08806  | 0.52462  | -2.34933 |
| H  | 3.84948  | -1.03792 | -1.52489 |
| H  | 4.12232  | 0.42026  | -0.56223 |

5s\_AQ\_T

|   |          |         |         |
|---|----------|---------|---------|
| C | -1.37806 | 2.18146 | 0.72165 |
| C | -1.91691 | 3.46446 | 0.78085 |
| C | -3.24019 | 3.66662 | 1.23763 |

|   |          |          |          |
|---|----------|----------|----------|
| C | -4.05117 | 2.62978  | 1.64701  |
| C | -3.54657 | 1.30552  | 1.60026  |
| C | -2.2278  | 1.10812  | 1.11276  |
| N | -1.69491 | -0.13872 | 0.98723  |
| C | -2.37296 | -1.20594 | 1.39123  |
| C | -3.6679  | -1.09201 | 1.92318  |
| C | -4.2583  | 0.15345  | 2.00762  |
| N | -0.07155 | 1.78866  | 0.40326  |
| H | -3.61896 | 4.68402  | 1.26406  |
| H | -5.06149 | 2.80653  | 2.00086  |
| H | -5.27016 | 0.26131  | 2.3873   |
| H | -4.19123 | -1.98801 | 2.23593  |
| H | -1.89051 | -2.16693 | 1.2623   |
| C | 0.8178   | 2.75271  | -0.09188 |
| C | 2.26048  | 2.57818  | 0.24791  |
| C | 3.21708  | 3.17253  | -0.58427 |
| C | 2.67299  | 1.90136  | 1.40028  |
| C | 4.57216  | 3.0631   | -0.28184 |
| C | 4.02698  | 1.80276  | 1.71089  |
| C | 4.97981  | 2.37695  | 0.86571  |
| H | 1.9251   | 1.45725  | 2.04463  |
| H | 5.31136  | 3.51027  | -0.9397  |
| H | 4.34019  | 1.27565  | 2.6074   |
| H | 6.03667  | 2.29347  | 1.10216  |
| O | 0.45006  | 3.73626  | -0.72936 |
| H | -1.32594 | 4.31075  | 0.46513  |
| C | 0.60638  | -2.76701 | -0.4908  |
| C | 0.90892  | -3.90788 | -1.22375 |
| C | 1.83472  | -4.85389 | -0.72976 |
| C | 2.46076  | -4.69548 | 0.48839  |
| C | 2.17883  | -3.5484  | 1.27234  |
| C | 1.25854  | -2.58489 | 0.77247  |
| N | 0.95263  | -1.45689 | 1.47491  |
| C | 1.48617  | -1.25724 | 2.66642  |
| C | 2.39599  | -2.16512 | 3.24779  |
| C | 2.74809  | -3.29686 | 2.54554  |
| N | -0.28845 | -1.75855 | -0.84641 |
| H | 2.04821  | -5.73076 | -1.33362 |
| H | 3.16039  | -5.43687 | 0.86147  |
| H | 3.45746  | -4.00849 | 2.95843  |
| H | 2.80944  | -1.95507 | 4.22784  |
| H | 1.19923  | -0.34612 | 3.18285  |
| C | -1.40114 | -2.01182 | -1.62578 |
| C | -2.25994 | -0.81364 | -1.896   |

|         |          |          |          |    |          |          |          |
|---------|----------|----------|----------|----|----------|----------|----------|
| C       | -3.64959 | -0.96452 | -1.79423 | C  | 3.92111  | 2.31029  | 1.5412   |
| C       | -1.71781 | 0.44513  | -2.18733 | C  | 4.78462  | 3.10254  | 0.78169  |
| C       | -4.48356 | 0.14259  | -1.92555 | H  | 1.90513  | 1.57861  | 1.75195  |
| C       | -2.56118 | 1.54983  | -2.33266 | H  | 4.98126  | 4.39827  | -0.93258 |
| C       | -3.93997 | 1.40504  | -2.18754 | H  | 4.29314  | 1.77436  | 2.40885  |
| H       | -0.64636 | 0.56917  | -2.33568 | H  | 5.8313   | 3.18301  | 1.06005  |
| H       | -5.55821 | 0.02487  | -1.81982 | O  | 0.17354  | 3.59951  | -1.14369 |
| H       | -2.1288  | 2.52169  | -2.54712 | H  | -1.2406  | 4.26317  | 0.63931  |
| H       | -4.59184 | 2.26854  | -2.28091 | C  | 0.34916  | -3.1528  | -0.44685 |
| O       | -1.73054 | -3.13218 | -2.02106 | C  | 0.39127  | -4.44288 | -0.9773  |
| H       | 0.41789  | -4.07388 | -2.17165 | C  | 1.12617  | -5.46708 | -0.34523 |
| Co      | 0.02135  | -0.11079 | 0.07437  | C  | 1.8218   | -5.25131 | 0.82521  |
| C       | 2.08426  | 0.30083  | -1.84201 | C  | 1.8039   | -3.96246 | 1.4134   |
| O       | 1.76574  | -0.10242 | -0.6421  | C  | 1.0781   | -2.91202 | 0.77455  |
| O       | 1.32929  | 0.85251  | -2.64151 | N  | 1.03186  | -1.65658 | 1.3132   |
| C       | 3.53239  | -0.00502 | -2.18199 | C  | 1.65029  | -1.40677 | 2.45417  |
| H       | 2.88029  | 3.70155  | -1.46861 | C  | 2.38421  | -2.38455 | 3.1552   |
| H       | -4.05752 | -1.94864 | -1.58872 | C  | 2.46538  | -3.65343 | 2.62784  |
| H       | 3.84281  | 0.57317  | -3.05354 | N  | -0.33698 | -2.06449 | -0.96379 |
| H       | 3.62043  | -1.07331 | -2.41046 | H  | 1.13519  | -6.45302 | -0.80153 |
| H       | 4.18193  | 0.21144  | -1.33162 | H  | 2.37848  | -6.04883 | 1.30755  |
| 5s_AQ_Q |          |          |          | H  | 3.02951  | -4.43202 | 3.13392  |
| C       | -1.30124 | 2.10305  | 0.7771   | H  | 2.87414  | -2.12398 | 4.08693  |
| C       | -1.82083 | 3.41013  | 0.96305  | H  | 1.57172  | -0.39414 | 2.83859  |
| C       | -3.07473 | 3.604    | 1.54802  | C  | -1.42602 | -2.21338 | -1.77599 |
| C       | -3.85659 | 2.53616  | 1.96684  | C  | -2.13381 | -0.91252 | -2.05108 |
| C       | -3.38831 | 1.20188  | 1.80941  | C  | -3.53211 | -0.89709 | -1.96069 |
| C       | -2.11869 | 0.98762  | 1.21594  | C  | -1.4485  | 0.28423  | -2.30429 |
| N       | -1.61488 | -0.24459 | 1.0134   | C  | -4.23019 | 0.30398  | -2.0618  |
| C       | -2.31747 | -1.30656 | 1.393    | C  | -2.15292 | 1.48616  | -2.41968 |
| C       | -3.5799  | -1.19669 | 1.99996  | C  | -3.54004 | 1.50192  | -2.28055 |
| C       | -4.11966 | 0.05815  | 2.20346  | H  | -0.36884 | 0.30215  | -2.45281 |
| N       | -0.10051 | 1.78844  | 0.26225  | H  | -5.31254 | 0.30978  | -1.96577 |
| H       | -3.44131 | 4.61748  | 1.67444  | H  | -1.60264 | 2.40551  | -2.58825 |
| H       | -4.82976 | 2.70558  | 2.41648  | H  | -4.08497 | 2.43894  | -2.35187 |
| H       | -5.09841 | 0.17952  | 2.658    | O  | -1.91223 | -3.27887 | -2.17917 |
| H       | -4.11444 | -2.09444 | 2.28865  | H  | -0.16321 | -4.64811 | -1.8807  |
| H       | -1.86967 | -2.27327 | 1.19137  | Co | 0.24532  | -0.29102 | -0.13863 |
| C       | 0.67368  | 2.8205   | -0.34607 | C  | 2.40514  | 0.48814  | -1.88054 |
| C       | 2.09855  | 2.88605  | 0.05706  | O  | 2.08547  | -0.18731 | -0.81782 |
| C       | 2.96721  | 3.68533  | -0.69929 | O  | 1.60244  | 1.11164  | -2.58677 |
| C       | 2.58166  | 2.19846  | 1.17665  | C  | 3.88811  | 0.46784  | -2.20718 |
| C       | 4.30651  | 3.78907  | -0.3393  | H  | 2.57562  | 4.20033  | -1.56881 |
|         |          |          |          | H  | -4.05239 | -1.83358 | -1.78877 |

|           |          |          |          |         |          |          |          |
|-----------|----------|----------|----------|---------|----------|----------|----------|
| H         | 4.10457  | 1.10123  | -3.06876 | N       | -0.37294 | 1.98288  | 0.43889  |
| H         | 4.20182  | -0.55983 | -2.41996 | H       | 0.95012  | 6.06586  | -1.32243 |
| H         | 4.46028  | 0.81078  | -1.34038 | H       | 1.37635  | 5.03466  | -3.53201 |
| TS3s_AQ_S |          |          |          | H       | 1.31748  | 2.90325  | -4.98214 |
| C         | -1.65518 | -2.14571 | -0.98924 | H       | 0.8005   | 0.46436  | -5.11966 |
| C         | -2.09503 | -3.42604 | -1.33083 | H       | 0.04533  | -0.7394  | -3.0416  |
| C         | -3.41766 | -3.64686 | -1.76183 | C       | -0.94661 | 2.30198  | 1.63792  |
| C         | -4.34126 | -2.62449 | -1.86025 | C       | -1.53163 | 1.07287  | 2.2594   |
| C         | -3.9495  | -1.31162 | -1.5094  | C       | -2.58707 | 1.1674   | 3.16134  |
| C         | -2.61155 | -1.09279 | -1.06945 | C       | -1.0738  | -0.18372 | 1.79314  |
| N         | -2.18114 | 0.14688  | -0.69052 | C       | -3.22672 | 0.00147  | 3.58936  |
| C         | -3.0001  | 1.18621  | -0.75449 | C       | -1.7388  | -1.34302 | 2.23066  |
| C         | -4.33186 | 1.05547  | -1.19312 | C       | -2.8095  | -1.24867 | 3.12016  |
| C         | -4.80493 | -0.18342 | -1.56136 | H       | 0.19764  | -0.35045 | 1.89599  |
| N         | -0.35687 | -1.76197 | -0.66302 | H       | -4.0584  | 0.06688  | 4.28528  |
| H         | -3.71058 | -4.6597  | -2.02312 | H       | -1.39755 | -2.3167  | 1.8904   |
| H         | -5.35742 | -2.80885 | -2.1932  | H       | -3.31558 | -2.14909 | 3.45628  |
| H         | -5.83093 | -0.31119 | -1.89423 | O       | -1.05993 | 3.43626  | 2.11494  |
| H         | -4.96253 | 1.93651  | -1.22544 | H       | 0.11368  | 4.71939  | 0.59045  |
| H         | -2.60141 | 2.1432   | -0.44745 | Co      | -0.32375 | 0.16577  | -0.13049 |
| C         | 0.46191  | -2.72328 | -0.08538 | C       | 2.11471  | -0.01198 | 1.29397  |
| C         | 1.94052  | -2.61601 | -0.3013  | O       | 1.57407  | 0.25244  | 0.17413  |
| C         | 2.79189  | -3.21957 | 0.63433  | O       | 1.46827  | -0.43122 | 2.29642  |
| C         | 2.48951  | -2.03394 | -1.44857 | C       | 3.59549  | 0.22671  | 1.4124   |
| C         | 4.16998  | -3.22601 | 0.43307  | H       | -2.91139 | 2.14773  | 3.49633  |
| C         | 3.86703  | -2.05562 | -1.66122 | H       | 2.35287  | -3.67937 | 1.51249  |
| C         | 4.71079  | -2.64847 | -0.71907 | H       | 3.75558  | 1.29615  | 1.59052  |
| H         | 1.83299  | -1.56944 | -2.17108 | H       | 4.00993  | -0.33704 | 2.24799  |
| H         | 4.82254  | -3.68525 | 1.16967  | H       | 4.09303  | -0.045   | 0.48096  |
| H         | 4.2821   | -1.60962 | -2.56041 | 6s_AQ_S |          |          |          |
| H         | 5.78469  | -2.66112 | -0.88176 | C       | -2.54153 | -1.37411 | -0.83847 |
| O         | 0.03204  | -3.68965 | 0.55519  | C       | -3.40882 | -2.36886 | -1.29526 |
| H         | -1.41351 | -4.26209 | -1.25622 | C       | -4.80129 | -2.15762 | -1.32694 |
| C         | 0.10832  | 2.87902  | -0.49508 | C       | -5.37764 | -0.97757 | -0.90065 |
| C         | 0.32024  | 4.24825  | -0.35995 | C       | -4.54369 | 0.05495  | -0.41148 |
| C         | 0.78744  | 5.00094  | -1.46126 | C       | -3.13512 | -0.16039 | -0.38358 |
| C         | 1.03105  | 4.43449  | -2.69635 | N       | -2.2808  | 0.79321  | 0.09403  |
| C         | 0.81166  | 3.04537  | -2.88034 | C       | -2.75018 | 1.95216  | 0.53417  |
| C         | 0.36707  | 2.28039  | -1.7686  | C       | -4.1276  | 2.24447  | 0.52619  |
| N         | 0.13216  | 0.93791  | -1.87285 | C       | -5.01765 | 1.3039   | 0.06069  |
| C         | 0.27027  | 0.32071  | -3.03321 | N       | -1.14829 | -1.38995 | -0.85498 |
| C         | 0.6959   | 1.00874  | -4.18801 | H       | -5.43376 | -2.95889 | -1.69839 |
| C         | 0.97806  | 2.35542  | -4.10779 |         |          |          |          |



|   |          |          |          |         |          |          |          |
|---|----------|----------|----------|---------|----------|----------|----------|
| H | -6.45235 | -0.82979 | -0.92627 | O       | 0.70858  | 2.77077  | 2.96062  |
| H | -6.08531 | 1.50334  | 0.05161  | H       | 1.38006  | 4.29439  | 1.42264  |
| H | -4.46102 | 3.20763  | 0.89526  | Co      | -0.44298 | 0.26259  | 0.03488  |
| H | -2.02318 | 2.6609   | 0.90525  | C       | 2.30709  | -0.77781 | 0.53651  |
| C | -0.52204 | -2.62194 | -0.84996 | O       | 1.47857  | -0.16901 | -0.15052 |
| C | 0.8631   | -2.71292 | -1.42049 | O       | 2.00894  | -1.47797 | 1.60916  |
| C | 1.72289  | -3.70116 | -0.92192 | C       | 3.76363  | -0.73077 | 0.20523  |
| C | 1.28201  | -1.92574 | -2.49836 | H       | 4.19758  | 0.13664  | 0.71643  |
| C | 2.98931  | -3.88013 | -1.47451 | H       | 4.27174  | -1.63033 | 0.55236  |
| C | 2.53991  | -2.11869 | -3.06818 | H       | 3.8899   | -0.60451 | -0.86912 |
| C | 3.39907  | -3.09225 | -2.55389 | H       | -0.03166 | 1.09223  | 4.85372  |
| H | 0.61898  | -1.16615 | -2.88793 | H       | 1.37973  | -4.32191 | -0.10171 |
| H | 3.65292  | -4.63965 | -1.0717  |         |          |          |          |
| H | 2.84933  | -1.50917 | -3.9123  | 6s_AQ_T |          |          |          |
| H | 4.38163  | -3.23909 | -2.99302 | C       | -0.25529 | 2.44248  | -1.46059 |
| O | -1.04558 | -3.66553 | -0.43829 | C       | -0.80867 | 3.5026   | -2.17825 |
| H | -3.00721 | -3.31717 | -1.62207 | C       | -0.01635 | 4.58202  | -2.61977 |
| C | 0.60384  | 2.85986  | 0.04352  | C       | 1.33523  | 4.65605  | -2.35553 |
| C | 1.19123  | 4.07859  | 0.38074  | C       | 1.94619  | 3.61378  | -1.61915 |
| C | 1.5198   | 5.01057  | -0.6282  | C       | 1.14885  | 2.51431  | -1.18052 |
| C | 1.26637  | 4.77536  | -1.96456 | N       | 1.68994  | 1.49753  | -0.46018 |
| C | 0.66114  | 3.55268  | -2.3509  | C       | 2.97257  | 1.50068  | -0.14739 |
| C | 0.35339  | 2.59525  | -1.34401 | C       | 3.83724  | 2.54021  | -0.54908 |
| N | -0.21991 | 1.39248  | -1.64651 | C       | 3.32273  | 3.5881   | -1.27917 |
| C | -0.55649 | 1.1172   | -2.89443 | N       | -0.9276  | 1.27577  | -1.07385 |
| C | -0.3003  | 2.01209  | -3.95414 | H       | -0.49879 | 5.37722  | -3.18097 |
| C | 0.31728  | 3.21372  | -3.68434 | H       | 1.93388  | 5.49545  | -2.69492 |
| N | 0.18525  | 1.85245  | 0.88731  | H       | 3.95959  | 4.40819  | -1.59893 |
| H | 1.97972  | 5.94854  | -0.32983 | H       | 4.88554  | 2.50167  | -0.27445 |
| H | 1.51307  | 5.5118   | -2.72272 | H       | 3.32765  | 0.66173  | 0.44317  |
| H | 0.53502  | 3.91727  | -4.48301 | C       | -2.29652 | 1.35099  | -0.88264 |
| H | -0.58857 | 1.73928  | -4.96328 | C       | -3.06489 | 0.06738  | -0.95079 |
| H | -1.04032 | 0.16025  | -3.05884 | C       | -4.19169 | -0.07882 | -0.13139 |
| C | 0.27333  | 1.854    | 2.25395  | C       | -2.7388  | -0.94713 | -1.85545 |
| C | -0.26025 | 0.56634  | 2.78976  | C       | -4.95119 | -1.24491 | -0.18355 |
| C | -0.35578 | 0.32235  | 4.15948  | C       | -3.51377 | -2.10331 | -1.92869 |
| C | -0.65625 | -0.39723 | 1.83639  | C       | -4.61386 | -2.26036 | -1.08434 |
| C | -0.8607  | -0.90105 | 4.60358  | H       | -1.87821 | -0.82575 | -2.49918 |
| C | -1.16637 | -1.61727 | 2.29617  | H       | -5.81075 | -1.36086 | 0.47018  |
| C | -1.26259 | -1.86353 | 3.6754   | H       | -3.2555  | -2.88313 | -2.63918 |
| H | 1.04215  | -1.38452 | 1.79737  | H       | -5.21211 | -3.16579 | -1.13133 |
| H | -0.93845 | -1.10551 | 5.66742  | O       | -2.91692 | 2.39824  | -0.66139 |
| H | -1.47929 | -2.38668 | 1.59681  | H       | -1.86739 | 3.50273  | -2.39401 |
| H | -1.65518 | -2.81666 | 4.01986  | C       | 1.8542   | -2.16409 | 0.60034  |

|         |          |          |          |   |          |          |          |
|---------|----------|----------|----------|---|----------|----------|----------|
| C       | 2.58616  | -3.19419 | 1.18504  | C | 1.75132  | 3.63518  | -1.64624 |
| C       | 3.05947  | -4.26728 | 0.39548  | C | 0.98341  | 2.51749  | -1.21327 |
| C       | 2.83808  | -4.33751 | -0.96393 | N | 1.56804  | 1.4386   | -0.63116 |
| C       | 2.10519  | -3.30337 | -1.60158 | C | 2.8799   | 1.3989   | -0.45431 |
| C       | 1.60406  | -2.2351  | -0.80819 | C | 3.7176   | 2.45248  | -0.86646 |
| N       | 0.88366  | -1.21093 | -1.35588 | C | 3.15319  | 3.56442  | -1.45637 |
| C       | 0.68254  | -1.16873 | -2.66269 | N | -1.0737  | 1.30679  | -0.96    |
| C       | 1.14977  | -2.18067 | -3.5242  | H | -0.81108 | 5.54916  | -2.79928 |
| C       | 1.84457  | -3.24682 | -2.9931  | H | 1.65913  | 5.59489  | -2.57052 |
| N       | 1.33577  | -1.03142 | 1.20337  | H | 3.77257  | 4.39785  | -1.77567 |
| H       | 3.62358  | -5.05521 | 0.88629  | H | 4.78738  | 2.37893  | -0.70714 |
| H       | 3.2201   | -5.16345 | -1.55543 | H | 3.27036  | 0.51407  | 0.03751  |
| H       | 2.20888  | -4.04555 | -3.63305 | C | -2.4434  | 1.3482   | -0.70384 |
| H       | 0.95302  | -2.10786 | -4.58794 | C | -3.22026 | 0.1082   | -1.00663 |
| H       | 0.13211  | -0.31057 | -3.03327 | C | -4.4202  | -0.11372 | -0.31743 |
| C       | 1.50626  | -0.68108 | 2.52088  | C | -2.81001 | -0.80161 | -1.98658 |
| C       | 0.72805  | 0.55867  | 2.80198  | C | -5.18282 | -1.24751 | -0.5861  |
| C       | 0.72068  | 1.16537  | 4.05808  | C | -3.58165 | -1.92713 | -2.26872 |
| C       | -0.0247  | 1.08698  | 1.73643  | C | -4.76515 | -2.15601 | -1.56377 |
| C       | -0.04624 | 2.31297  | 4.25865  | H | -1.88631 | -0.62156 | -2.52085 |
| C       | -0.78686 | 2.24054  | 1.93883  | H | -6.10421 | -1.42293 | -0.03878 |
| C       | -0.7971  | 2.84254  | 3.20595  | H | -3.25827 | -2.62673 | -3.03372 |
| H       | -1.72395 | -0.08343 | 2.26608  | H | -5.3631  | -3.03733 | -1.77698 |
| H       | -0.06398 | 2.79304  | 5.23262  | O | -3.01912 | 2.33294  | -0.23448 |
| H       | -1.38041 | 2.67241  | 1.13982  | H | -2.12943 | 3.6305   | -2.01867 |
| H       | -1.39817 | 3.73388  | 3.36421  | C | 2.01048  | -2.19982 | 0.73097  |
| O       | 2.18312  | -1.28127 | 3.36002  | C | 2.78536  | -3.17519 | 1.36453  |
| H       | 2.79279  | -3.15193 | 2.24479  | C | 3.28776  | -4.28014 | 0.64515  |
| Co      | 0.20311  | 0.07107  | 0.08917  | C | 3.05783  | -4.4492  | -0.70447 |
| C       | -2.00491 | -1.82319 | 1.58452  | C | 2.2854   | -3.48401 | -1.39696 |
| O       | -1.28855 | -1.64774 | 0.60645  | C | 1.75393  | -2.37387 | -0.67533 |
| O       | -2.24931 | -0.88039 | 2.49316  | N | 1.00054  | -1.4217  | -1.29446 |
| C       | -2.66055 | -3.13364 | 1.90364  | C | 0.78295  | -1.49254 | -2.59786 |
| H       | -2.06813 | -3.63783 | 2.6758   | C | 1.2747   | -2.54846 | -3.39027 |
| H       | -3.66607 | -2.97767 | 2.29824  | C | 2.01167  | -3.5433  | -2.78616 |
| H       | -2.69127 | -3.75676 | 1.01115  | N | 1.458    | -1.0623  | 1.27687  |
| H       | 1.31109  | 0.72356  | 4.85555  | H | 3.88228  | -5.01468 | 1.1818   |
| H       | -4.45092 | 0.72603  | 0.54767  | H | 3.46085  | -5.29938 | -1.24596 |
| 6s_AQ_Q |          |          |          | H | 2.39924  | -4.377   | -3.36536 |
| C       | -0.44245 | 2.48525  | -1.34881 | H | 1.06456  | -2.56467 | -4.45403 |
| C       | -1.05304 | 3.6035   | -1.9177  | H | 0.20262  | -0.68638 | -3.03606 |
| C       | -0.29049 | 4.70601  | -2.35515 | C | 1.65107  | -0.6753  | 2.5691   |
| C       | 1.08321  | 4.73967  | -2.23171 | C | 0.89089  | 0.58272  | 2.8831   |
|         |          |          |          | C | 1.05555  | 1.22177  | 4.11523  |

|         |          |          |          |    |          |          |          |
|---------|----------|----------|----------|----|----------|----------|----------|
| C       | 0.0136   | 1.10916  | 1.92667  | C  | -5.12056 | -1.93382 | -1.84055 |
| C       | 0.35324  | 2.39745  | 4.38205  | H  | -1.96761 | -0.8279  | -2.44127 |
| C       | -0.68332 | 2.2911   | 2.18832  | H  | -6.52447 | -0.97569 | -0.51154 |
| C       | -0.51319 | 2.93115  | 3.42448  | H  | -3.52564 | -2.63326 | -3.11212 |
| H       | -1.54931 | -0.05776 | 2.24799  | H  | -5.80652 | -2.72631 | -2.12502 |
| H       | 0.47945  | 2.89937  | 5.33732  | O  | -2.99743 | 2.28836  | -0.29201 |
| H       | -1.36853 | 2.70873  | 1.45521  | H  | -2.05482 | 3.43722  | -2.1607  |
| H       | -1.06176 | 3.84552  | 3.63613  | C  | 2.14576  | -2.06256 | 0.30669  |
| O       | 2.35566  | -1.22866 | 3.42626  | C  | 3.12972  | -2.95218 | 0.73591  |
| H       | 2.99811  | -3.05879 | 2.41699  | C  | 3.72868  | -3.84571 | -0.178   |
| Co      | 0.1566   | 0.04026  | 0.04584  | C  | 3.39199  | -3.87142 | -1.51552 |
| C       | -2.04211 | -1.69589 | 1.43932  | C  | 2.40939  | -2.97192 | -1.99886 |
| O       | -1.27671 | -1.5501  | 0.48528  | C  | 1.77473  | -2.09094 | -1.07724 |
| O       | -2.19234 | -0.79774 | 2.39701  | N  | 0.80934  | -1.20775 | -1.47258 |
| C       | -2.85924 | -2.93629 | 1.63076  | C  | 0.50229  | -1.10619 | -2.75627 |
| H       | -2.31591 | -3.60215 | 2.31122  | C  | 1.08019  | -1.93655 | -3.737   |
| H       | -3.823   | -2.69936 | 2.08356  | C  | 2.01475  | -2.87539 | -3.35566 |
| H       | -2.99513 | -3.43833 | 0.674    | N  | 1.48273  | -1.10451 | 1.04843  |
| H       | 1.73595  | 0.78478  | 4.84005  | H  | 4.48287  | -4.53274 | 0.19532  |
| H       | -4.73288 | 0.60895  | 0.42814  | H  | 3.87149  | -4.55911 | -2.20473 |
| 7s_AQ_S |          |          |          | H  | 2.47047  | -3.53529 | -4.08854 |
| C       | -0.43082 | 2.29138  | -1.34483 | H  | 0.78267  | -1.82305 | -4.77351 |
| C       | -0.98457 | 3.38654  | -2.01473 | H  | -0.21195 | -0.33347 | -3.0161  |
| C       | -0.1742  | 4.43103  | -2.49652 | C  | 1.76706  | -0.77414 | 2.35213  |
| C       | 1.19661  | 4.43777  | -2.32655 | C  | 0.99509  | 0.43832  | 2.74096  |
| C       | 1.80543  | 3.36332  | -1.63816 | C  | 1.1213   | 1.02259  | 4.00299  |
| C       | 0.98182  | 2.30567  | -1.15123 | C  | 0.12538  | 0.96688  | 1.76869  |
| N       | 1.51521  | 1.25311  | -0.46018 | C  | 0.37685  | 2.16295  | 4.3047   |
| C       | 2.82161  | 1.19212  | -0.23625 | C  | -0.59893 | 2.12094  | 2.07154  |
| C       | 3.69941  | 2.18929  | -0.70156 | C  | -0.47561 | 2.70745  | 3.339    |
| C       | 3.19719  | 3.26729  | -1.39277 | H  | 0.46136  | 2.62937  | 5.28203  |
| N       | -1.09199 | 1.1405   | -0.93157 | H  | -1.27228 | 2.56175  | 1.34268  |
| H       | -0.65353 | 5.2553   | -3.01704 | H  | -1.05209 | 3.59972  | 3.57055  |
| H       | 1.8113   | 5.24974  | -2.70086 | O  | 2.5597   | -1.36195 | 3.09726  |
| H       | 3.854    | 4.05395  | -1.7526  | H  | 3.41703  | -2.94358 | 1.7765   |
| H       | 4.75886  | 2.08963  | -0.49525 | Co | 0.20938  | -0.02347 | 0.12485  |
| H       | 3.1843   | 0.34412  | 0.32508  | H  | 1.79762  | 0.57298  | 4.72443  |
| C       | -2.46029 | 1.25914  | -0.71617 | H  | -4.94897 | 0.84994  | 0.11572  |
| C       | -3.34298 | 0.10451  | -1.08896 | C  | -1.40796 | -2.13519 | 0.62564  |
| C       | -4.64608 | 0.0679   | -0.57089 | C  | -1.76684 | -1.25562 | 1.58519  |
| C       | -2.9587  | -0.86923 | -2.01602 | C  | -1.92152 | -1.1216  | 3.04034  |
| C       | -5.52343 | -0.94976 | -0.93191 | C  | -2.83987 | -0.37742 | 2.06615  |
| C       | -3.84005 | -1.8844  | -2.39093 | H  | -1.21548 | -0.51646 | 3.59885  |
|         |          |          |          | H  | -2.30773 | -1.98531 | 3.57927  |

|   |          |          |          |    |             |             |             |
|---|----------|----------|----------|----|-------------|-------------|-------------|
| H | -3.85915 | -0.72723 | 1.92845  | C  | -1.90279900 | 1.13789600  | 3.11458200  |
| H | -2.71919 | 0.69885  | 2.01297  | H  | -0.08202500 | -0.05381100 | 3.25141400  |
| H | -1.83815 | -2.0152  | -0.36172 | H  | -3.67107600 | 2.24847700  | 2.61466500  |
| C | -0.61216 | -3.34291 | 0.82827  | H  | -4.34716900 | 2.70574700  | 0.17453000  |
| C | -0.40414 | -4.20926 | -0.26132 | H  | -2.02128100 | 1.23226200  | 4.18807800  |
| C | -0.0276  | -3.68099 | 2.05778  | N  | -0.60873600 | 0.28219300  | 1.29784400  |
| C | 0.36703  | -5.3534  | -0.13669 | Co | 0.83812500  | -0.72950900 | 0.32131800  |
| H | -0.84549 | -3.96242 | -1.22294 | C  | -0.62920600 | -2.48021900 | 0.75423200  |
| C | 0.75501  | -4.82135 | 2.19707  | C  | 0.38626200  | -2.76078400 | -0.14522500 |
| H | -0.14966 | -3.02318 | 2.9086   | C  | 0.45725800  | -3.48128700 | -1.43161800 |
| C | 0.96785  | -5.65908 | 1.09278  | C  | 1.34078400  | -3.88484600 | -0.24492600 |
| H | 0.54477  | -6.01027 | -0.98112 | H  | 0.96752400  | -3.01801100 | -2.26821600 |
| H | 1.21411  | -5.0336  | 3.15435  | H  | -0.38541700 | -4.11309300 | -1.70314300 |
| O | 1.74397  | -6.77465 | 1.11332  | H  | 1.09402100  | -4.78899200 | 0.30689200  |
| C | 2.44082  | -7.07973 | 2.31526  | H  | 2.39933500  | -3.68321400 | -0.34297600 |
| H | 3.02343  | -7.97847 | 2.10563  | C  | 2.58729900  | -0.65691600 | 2.56096300  |
| H | 3.11934  | -6.26751 | 2.60333  | O  | 1.72391900  | -1.35259100 | 1.93990700  |
| H | 1.75079  | -7.2848  | 3.14293  | O  | 2.94869200  | 0.51415800  | 2.24791600  |

5s\_AgOAc\_S

|   |             |             |             |   |             |             |             |
|---|-------------|-------------|-------------|---|-------------|-------------|-------------|
| C | 4.56142400  | -1.56649100 | -1.58886800 | H | 2.66290400  | -2.11800200 | 4.14731500  |
| C | 4.25701300  | -1.15891900 | -2.89098600 | H | -0.37819700 | -2.58321000 | 1.80796300  |
| C | 2.97740800  | -0.68993600 | -3.18979600 | C | -2.01307500 | -2.18235500 | 0.46789700  |
| C | 2.01684700  | -0.64064200 | -2.18050400 | C | -2.90422100 | -1.99669700 | 1.54946100  |
| C | 2.30668100  | -1.05571200 | -0.86867400 | C | -2.50803800 | -1.99476200 | -0.83651900 |
| C | 3.59077300  | -1.52080600 | -0.58024700 | C | -4.21229800 | -1.61153100 | 1.34235000  |
| H | 5.56031900  | -1.92550400 | -1.35502500 | H | -2.54002100 | -2.13487300 | 2.56279500  |
| H | 5.01768200  | -1.20182600 | -3.66466000 | C | -3.81926400 | -1.59995000 | -1.05735600 |
| H | 2.70998800  | -0.34487000 | -4.18393400 | H | -1.83823400 | -2.10553400 | -1.67933400 |
| H | 3.84401900  | -1.85463900 | 0.42127100  | C | -4.67371900 | -1.38014100 | 0.03360400  |
| C | 0.65442500  | -0.08223300 | -2.39897700 | H | -4.89477000 | -1.44667900 | 2.16838700  |
| O | 0.21437900  | 0.29285100  | -3.48475900 | H | -4.15481400 | -1.42519900 | -2.07086100 |
| N | -0.01273800 | -0.02091800 | -1.19137700 | O | -5.94850900 | -0.94442900 | -0.06994800 |
| C | -1.16554400 | 0.69799300  | -0.96931100 | C | -6.42605200 | -0.55963700 | -1.35453400 |
| C | -1.47840000 | 0.85565300  | 0.41563800  | H | -7.43693000 | -0.18168000 | -1.19602300 |
| C | -2.00957100 | 1.29272600  | -1.90512500 | H | -5.80299300 | 0.23267200  | -1.78507600 |
| C | -2.62007400 | 1.57990900  | 0.84588500  | H | -6.46691000 | -1.41262200 | -2.04254800 |
| C | -3.14962300 | 2.00331800  | -1.47196800 | C | 0.54591800  | 3.42708700  | -0.60297900 |
| H | -1.76931800 | 1.20234200  | -2.95440300 | O | 1.53531600  | 2.68133900  | -1.00278900 |
| C | -0.80609200 | 0.42464900  | 2.60132000  | O | 0.12653300  | 3.46365100  | 0.56147200  |
| C | -2.81087700 | 1.70079000  | 2.24082500  | C | -0.06170200 | 4.28734600  | -1.69703600 |
| C | -3.47181900 | 2.14524000  | -0.13693700 | H | -0.18670600 | 3.70157500  | -2.61039900 |
| H | -3.78632400 | 2.46003300  | -2.22464000 | H | -1.01964200 | 4.69497400  | -1.37185600 |

|            |             |             |             |            |             |             |             |
|------------|-------------|-------------|-------------|------------|-------------|-------------|-------------|
| H          | 0.62157300  | 5.11332500  | -1.92383200 | O          | -3.01093100 | -0.20975200 | 2.45676500  |
| Ag         | 2.15916200  | 1.53023100  | 0.59621300  | C          | -2.81475500 | 1.70403900  | 3.86067600  |
| 5s_AgOAc_T |             |             |             | H          | -3.49209100 | 2.49329300  | 3.51494000  |
| C          | -4.33571200 | 1.86526700  | -1.55650900 | H          | -3.33864900 | 1.09269300  | 4.59607400  |
| C          | -4.10009800 | 1.40760600  | -2.85828100 | H          | -1.94472400 | 2.18687000  | 4.31041400  |
| C          | -2.91045000 | 0.74688500  | -3.16264600 | H          | 0.64644500  | 3.12749400  | 1.56739600  |
| C          | -1.96615500 | 0.55369100  | -2.15420100 | C          | 2.24326500  | 2.32550500  | 0.32984700  |
| C          | -2.19150200 | 1.01310400  | -0.84844100 | C          | 3.05260700  | 2.05176500  | 1.44782100  |
| C          | -3.38599500 | 1.66989400  | -0.54612600 | C          | 2.72627800  | 1.95205100  | -0.93317000 |
| H          | -5.26574900 | 2.37704800  | -1.32458700 | C          | 4.27859000  | 1.41965300  | 1.31484100  |
| H          | -4.84816300 | 1.56440200  | -3.62938100 | H          | 2.70099800  | 2.33160100  | 2.43708200  |
| H          | -2.70483500 | 0.37072600  | -4.16027600 | C          | 3.95644300  | 1.31798900  | -1.08295500 |
| H          | -3.58538500 | 2.03344300  | 0.45609300  | H          | 2.11841600  | 2.13386300  | -1.81185200 |
| C          | -0.68722200 | -0.16944300 | -2.36544600 | C          | 4.73526100  | 1.03391900  | 0.04614300  |
| O          | -0.31157800 | -0.65258200 | -3.43109600 | H          | 4.89338400  | 1.19510800  | 2.17984300  |
| N          | 0.01483100  | -0.21044400 | -1.16963100 | H          | 4.28166100  | 1.02310300  | -2.07231900 |
| C          | 1.19916500  | -0.91270500 | -0.96368000 | O          | 5.93043200  | 0.38443400  | 0.01657800  |
| C          | 1.59426400  | -0.97537100 | 0.40440000  | C          | 6.42485500  | -0.03953400 | -1.24774900 |
| C          | 1.99361400  | -1.54794500 | -1.90812400 | H          | 7.37170900  | -0.54398700 | -1.04717400 |
| C          | 2.75636800  | -1.67612600 | 0.81395400  | H          | 5.73633700  | -0.74138700 | -1.73176400 |
| C          | 3.16346800  | -2.23270300 | -1.49990700 | H          | 6.60638300  | 0.81167900  | -1.91581100 |
| H          | 1.70575700  | -1.51799400 | -2.94830800 | C          | -1.13179300 | -3.30174100 | -0.66393900 |
| C          | 1.05781500  | -0.39351300 | 2.59493100  | O          | -2.24038400 | -2.65837800 | -0.87491000 |
| C          | 3.03066900  | -1.70842600 | 2.20040100  | O          | -0.51741200 | -3.30053900 | 0.41446800  |
| C          | 3.55273200  | -2.30319600 | -0.17994900 | C          | -0.61121000 | -4.05820400 | -1.87361900 |
| H          | 3.76257300  | -2.72186500 | -2.26232100 | H          | -0.42474700 | -3.34711400 | -2.68394100 |
| C          | 2.18090800  | -1.07944100 | 3.08838400  | H          | 0.30923700  | -4.59080500 | -1.63116400 |
| H          | 0.37530600  | 0.13113500  | 3.25436400  | H          | -1.36857300 | -4.76517400 | -2.22693900 |
| H          | 3.91090700  | -2.23634400 | 2.55521300  | Ag         | -2.59108700 | -1.45839400 | 0.79714600  |
| H          | 4.45017600  | -2.83647900 | 0.11556000  | 5s_AgOAc_Q |             |             |             |
| H          | 2.36708000  | -1.09773900 | 4.15606900  | C          | 4.50747000  | -1.26407500 | -2.01302900 |
| N          | 0.78423600  | -0.33812200 | 1.29880300  | C          | 4.01626100  | -0.94429200 | -3.28689500 |
| Co         | -0.74770400 | 0.56892600  | 0.34742500  | C          | 2.68457300  | -0.57353900 | -3.43652900 |
| C          | 0.93719300  | 2.96051800  | 0.53134300  | C          | 1.85366100  | -0.52947400 | -2.30732500 |
| C          | 0.11067900  | 3.39731800  | -0.42706500 | C          | 2.31525000  | -0.85259000 | -1.00923600 |
| C          | -0.09335200 | 3.67918100  | -1.84981700 | C          | 3.66803500  | -1.21475700 | -0.89607700 |
| C          | -1.03733100 | 4.23884400  | -0.77289600 | H          | 5.55011400  | -1.55012200 | -1.89640600 |
| H          | -0.49054700 | 2.88978100  | -2.48394000 | H          | 4.67510600  | -0.98025600 | -4.14941400 |
| H          | 0.59535600  | 4.35744200  | -2.35090100 | H          | 2.27854000  | -0.30944200 | -4.40835500 |
| H          | -0.97792400 | 5.30043100  | -0.53793800 | H          | 4.07911100  | -1.46498000 | 0.08024200  |
| H          | -2.03951400 | 3.82282500  | -0.73129600 | C          | 0.44327900  | -0.10569300 | -2.45327100 |
| C          | -2.40440900 | 0.87142700  | 2.67101300  | O          | -0.12381600 | 0.11359700  | -3.52026200 |
| O          | -1.46516600 | 1.35151300  | 1.94330400  | N          | -0.17502800 | 0.00971800  | -1.18660700 |

|    |             |             |             |             |             |             |             |
|----|-------------|-------------|-------------|-------------|-------------|-------------|-------------|
| C  | -1.24205300 | 0.76526900  | -0.92419100 | C           | -6.36394300 | -0.20592100 | -1.32557800 |
| C  | -1.54201600 | 0.89185700  | 0.49318400  | H           | -7.32269100 | 0.28957100  | -1.16413500 |
| C  | -2.06994200 | 1.45555600  | -1.84650200 | H           | -5.68325700 | 0.48182200  | -1.84135900 |
| C  | -2.65826700 | 1.64120800  | 0.93040500  | H           | -6.52016800 | -1.09594300 | -1.94724500 |
| C  | -3.17755200 | 2.17656400  | -1.39427600 | C           | 0.73024700  | 3.35046600  | -0.66631000 |
| H  | -1.84034900 | 1.37999600  | -2.89944200 | O           | 1.84238800  | 2.73440300  | -0.90519200 |
| C  | -0.89496800 | 0.42352500  | 2.66277400  | O           | 0.09801800  | 3.29677400  | 0.40141900  |
| C  | -2.86718600 | 1.74803600  | 2.32259600  | C           | 0.21584900  | 4.18285500  | -1.83414000 |
| C  | -3.48665500 | 2.26641900  | -0.04277900 | H           | 0.15403900  | 3.56506300  | -2.73508400 |
| H  | -3.80801900 | 2.68031300  | -2.11999500 | H           | -0.76279900 | 4.60863400  | -1.60789800 |
| C  | -1.97879600 | 1.14352300  | 3.19021800  | H           | 0.92389600  | 4.99106000  | -2.04633900 |
| H  | -0.17447600 | -0.06958000 | 3.30639200  | Ag          | 2.38549400  | 1.49901000  | 0.71199800  |
| H  | -3.71574000 | 2.31366400  | 2.69504900  |             |             |             |             |
| H  | -4.35171900 | 2.83196600  | 0.28850300  | TS1_AgOAc_S |             |             |             |
| H  | -2.10081300 | 1.21724200  | 4.26476300  | C           | 4.15468700  | -1.97949800 | -1.55943300 |
| N  | -0.69025400 | 0.29635400  | 1.35499000  | C           | 3.86478500  | -1.47392200 | -2.83044500 |
| Co | 0.85862000  | -0.86675900 | 0.42670900  | C           | 2.59815600  | -0.95075600 | -3.10211500 |
| C  | -0.78202500 | -2.85031700 | 0.68474700  | C           | 1.62425300  | -0.95034000 | -2.10694800 |
| C  | 0.11881900  | -3.23887500 | -0.23714400 | C           | 1.90541300  | -1.47606200 | -0.82951600 |
| C  | 0.34501100  | -3.66678200 | -1.62240100 | C           | 3.17391100  | -1.99462300 | -0.56251200 |
| C  | 1.30938400  | -4.05897300 | -0.49112200 | H           | 5.14514300  | -2.36936600 | -1.34274600 |
| H  | 0.72102400  | -2.94850000 | -2.34531200 | H           | 4.62891300  | -1.47513000 | -3.60174500 |
| H  | -0.32089700 | -4.42227500 | -2.03544900 | H           | 2.35855200  | -0.50856800 | -4.06396300 |
| H  | 1.30551800  | -5.08506600 | -0.12846800 | H           | 3.40074400  | -2.40778800 | 0.41428600  |
| H  | 2.28528300  | -3.58254500 | -0.50710300 | C           | 0.32288000  | -0.23843500 | -2.28247000 |
| C  | 2.62519000  | -0.78107700 | 2.74605900  | O           | -0.12616900 | 0.12672600  | -3.37225600 |
| O  | 1.69815400  | -1.44501100 | 2.17534500  | N           | -0.22878200 | -0.01046900 | -1.05373100 |
| O  | 3.03093100  | 0.36546100  | 2.40235300  | C           | -1.26683000 | 0.86303700  | -0.79644200 |
| C  | 3.30870300  | -1.44223300 | 3.92343800  | C           | -1.38862800 | 1.18021200  | 0.58668400  |
| H  | 3.99332700  | -2.20911100 | 3.54369900  | C           | -2.14942400 | 1.45492900  | -1.69157400 |
| H  | 3.87969300  | -0.71734500 | 4.50459700  | C           | -2.37902300 | 2.07648700  | 1.06275500  |
| H  | 2.57261800  | -1.94466000 | 4.55591900  | C           | -3.13828200 | 2.34629900  | -1.21559800 |
| H  | -0.50603800 | -2.96025000 | 1.73314500  | H           | -2.05935200 | 1.23116300  | -2.74460900 |
| C  | -2.13049200 | -2.33472600 | 0.43171600  | C           | -0.52332100 | 0.84283000  | 2.72413700  |
| C  | -2.95972700 | -2.02079200 | 1.52509000  | C           | -2.39663400 | 2.33005600  | 2.45390900  |
| C  | -2.62152800 | -2.07916000 | -0.85718300 | C           | -3.26740900 | 2.65829400  | 0.12189400  |
| C  | -4.20690300 | -1.44574500 | 1.34279500  | H           | -3.81352900 | 2.79816100  | -1.93649200 |
| H  | -2.60161700 | -2.21150900 | 2.53265000  | C           | -1.47228000 | 1.72012000  | 3.27819200  |
| C  | -3.87219800 | -1.50119500 | -1.05655300 | H           | 0.20781200  | 0.33427600  | 3.34061100  |
| H  | -2.00180300 | -2.30018000 | -1.71839700 | H           | -3.13784900 | 3.01085700  | 2.86221500  |
| C  | -4.66529400 | -1.16111100 | 0.04752700  | H           | -4.03067600 | 3.34780000  | 0.46753300  |
| H  | -4.83608200 | -1.18482200 | 2.18702100  | H           | -1.46180400 | 1.90438700  | 4.34642200  |
| H  | -4.20433800 | -1.29649700 | -2.06630700 | N           | -0.48558900 | 0.58278000  | 1.42296600  |
| O  | -5.87624600 | -0.54815200 | -0.03354400 | Co          | 0.66236100  | -0.68074100 | 0.46357200  |

|             |             |             |             |    |             |             |             |
|-------------|-------------|-------------|-------------|----|-------------|-------------|-------------|
| C           | -0.61854100 | -2.20271100 | 0.82450700  | C  | 1.74670400  | -0.54754500 | -2.15169500 |
| C           | 0.35119000  | -2.73754200 | -0.06808900 | C  | 1.87481200  | -1.35734500 | -1.00616500 |
| C           | 0.17317500  | -3.68903800 | -1.19048900 | C  | 3.11669300  | -1.90603200 | -0.67226700 |
| C           | 1.01385000  | -4.06194800 | 0.03307200  | H  | 5.18725000  | -2.08253600 | -1.22955000 |
| H           | 0.71738200  | -3.53652900 | -2.11492800 | H  | 4.93842300  | -0.73621100 | -3.30408400 |
| H           | -0.81469900 | -4.12552700 | -1.30892100 | H  | 2.72130900  | 0.29974400  | -3.85231200 |
| H           | 0.59721700  | -4.74582600 | 0.76829900  | H  | 3.22109900  | -2.52141500 | 0.21474600  |
| H           | 2.07841200  | -4.16375800 | -0.12860700 | C  | 0.48342000  | 0.23311600  | -2.33024400 |
| C           | -2.02986800 | -1.95658400 | 0.53379000  | O  | 0.13702200  | 0.74232900  | -3.40093600 |
| C           | -2.89021100 | -1.68335300 | 1.61793700  | N  | -0.15312100 | 0.32192100  | -1.12324200 |
| C           | -2.57904300 | -1.92703500 | -0.75861900 | C  | -1.29606700 | 1.05472700  | -0.86665800 |
| C           | -4.22447000 | -1.37431700 | 1.42305900  | C  | -1.67920100 | 1.06861100  | 0.51542500  |
| H           | -2.48689100 | -1.69607000 | 2.62650400  | C  | -2.09650400 | 1.73686000  | -1.77570400 |
| C           | -3.91867800 | -1.62081300 | -0.97050700 | C  | -2.84413200 | 1.75380100  | 0.95119200  |
| H           | -1.94254800 | -2.09938100 | -1.61662700 | C  | -3.26318700 | 2.40413500  | -1.33767000 |
| C           | -4.74841600 | -1.32584000 | 0.12075900  | H  | -1.81182800 | 1.74255300  | -2.81796300 |
| H           | -4.88015800 | -1.14941000 | 2.25742800  | C  | -1.15434900 | 0.40694100  | 2.68934800  |
| H           | -4.29796000 | -1.58597800 | -1.98388500 | C  | -3.12176200 | 1.73771100  | 2.33863100  |
| H           | -0.40907500 | -2.35843800 | 1.88040400  | C  | -3.64751000 | 2.41744800  | -0.01349200 |
| O           | -6.05647900 | -0.98374700 | 0.02027500  | H  | -3.86656800 | 2.92544400  | -2.07552300 |
| C           | -6.60768000 | -0.82252500 | -1.28306200 | C  | -2.27402900 | 1.08230700  | 3.20761600  |
| H           | -6.59572200 | -1.76385600 | -1.84575900 | H  | -0.47330300 | -0.14478400 | 3.32911500  |
| H           | -7.64182000 | -0.50792100 | -1.13471500 | H  | -4.00329600 | 2.25372800  | 2.70821600  |
| H           | -6.07116500 | -0.05185500 | -1.84927700 | H  | -4.53995600 | 2.94390500  | 0.30956500  |
| C           | 2.64961900  | -0.63909000 | 2.52169500  | H  | -2.45923200 | 1.07036500  | 4.27576500  |
| O           | 1.63975100  | -1.25392100 | 2.05146300  | N  | -0.88113600 | 0.39139600  | 1.39363000  |
| O           | 3.14075200  | 0.43007700  | 2.05763800  | Co | 0.54791200  | -0.67950800 | 0.39621700  |
| C           | 3.33447300  | -1.25585400 | 3.71812600  | C  | -4.05113600 | -1.73698000 | 1.23847700  |
| H           | 4.20803700  | -1.81715900 | 3.36716000  | C  | -4.58903900 | -1.26532000 | 0.02575800  |
| H           | 3.69175400  | -0.47597500 | 4.39376300  | C  | -3.81321000 | -1.31278100 | -1.14218200 |
| H           | 2.66805200  | -1.94221900 | 4.24227000  | C  | -2.50822400 | -1.78284100 | -1.08656700 |
| C           | 0.94528500  | 3.23215500  | -1.16454000 | C  | -1.93702600 | -2.22691900 | 0.12380800  |
| O           | 1.87696800  | 2.36001300  | -1.41568100 | C  | -2.75416700 | -2.20419300 | 1.28116800  |
| O           | 0.55220900  | 3.53113200  | -0.02816800 | H  | -4.66795700 | -1.69976800 | 2.12973900  |
| C           | 0.35673200  | 3.87672700  | -2.40836200 | H  | -4.20402100 | -0.95087700 | -2.08399500 |
| H           | 0.05474200  | 3.09676700  | -3.11219000 | H  | -1.90591000 | -1.75957800 | -1.98537400 |
| H           | -0.49840500 | 4.50325000  | -2.15166000 | H  | -2.33474200 | -2.53664700 | 2.22614100  |
| H           | 1.12162400  | 4.48723600  | -2.90073500 | C  | -0.55516800 | -2.63762700 | 0.26504700  |
| Ag          | 2.40310300  | 1.39219800  | 0.34178700  | C  | 0.38215300  | -2.84710700 | -0.76932200 |
|             |             |             |             | C  | 0.18528500  | -3.39629100 | -2.13112800 |
|             |             |             |             | C  | 1.08112400  | -4.11203700 | -1.11765500 |
| TS1_AgOAc_T |             |             |             | H  | 0.68749100  | -2.92823800 | -2.97021800 |
| C           | 4.21987100  | -1.66642600 | -1.49572900 | H  | -0.79064600 | -3.81604100 | -2.36071400 |
| C           | 4.07913300  | -0.90802800 | -2.66321900 | H  | 0.71158700  | -5.01742400 | -0.64268000 |
| C           | 2.84338600  | -0.34503600 | -2.98757900 |    |             |             |             |

|    |             |             |             |    |             |             |             |
|----|-------------|-------------|-------------|----|-------------|-------------|-------------|
| H  | 2.14493900  | -4.10488300 | -1.32145900 | C  | -2.83372700 | 2.12468200  | 2.21101200  |
| H  | -0.27049200 | -2.99625700 | 1.25243200  | C  | -3.31608400 | 2.77774300  | -0.17363800 |
| O  | -5.85188400 | -0.78617400 | 0.08897400  | H  | -3.50420000 | 3.21542800  | -2.25303300 |
| C  | -6.40898500 | -0.20014100 | -1.08601300 | C  | -2.04275700 | 1.40198300  | 3.08132000  |
| H  | -6.51390700 | -0.93708400 | -1.89087700 | H  | -0.38047500 | -0.01476300 | 3.21360600  |
| H  | -7.39806000 | 0.15995800  | -0.79942300 | H  | -3.64430100 | 2.74254700  | 2.58622200  |
| H  | -5.79876200 | 0.64105900  | -1.43244100 | H  | -4.14033800 | 3.41705200  | 0.12573200  |
| C  | 1.19016500  | 3.25972100  | -0.64015900 | H  | -2.20868700 | 1.43651100  | 4.15183500  |
| O  | 0.60303600  | 3.29470800  | 0.45203400  | N  | -0.76778800 | 0.51944500  | 1.27377100  |
| O  | 2.26004300  | 2.56370800  | -0.88114100 | Co | 0.52466000  | -0.55245100 | 0.40549600  |
| C  | 0.67719800  | 4.04026200  | -1.83959000 | C  | -0.55074300 | -2.18350900 | 0.09108700  |
| H  | 1.45862900  | 4.71186200  | -2.20991000 | C  | 0.22822600  | -2.70184200 | -1.10515000 |
| H  | 0.43938000  | 3.33845100  | -2.64447300 | C  | -0.43175000 | -3.17020800 | -2.38166100 |
| H  | -0.21162700 | 4.61600100  | -1.57781400 | C  | 0.14385400  | -4.18183400 | -1.42829700 |
| C  | 2.47688900  | -0.94800400 | 2.68238700  | H  | 0.09673100  | -2.98275400 | -3.31081600 |
| O  | 3.12761100  | 0.09415200  | 2.38845600  | H  | -1.50986000 | -3.11686900 | -2.45887200 |
| O  | 1.47399000  | -1.39923800 | 2.04295400  | H  | -0.55343500 | -4.77401100 | -0.84310800 |
| C  | 2.94637400  | -1.75647800 | 3.87163200  | H  | 1.05387800  | -4.70160800 | -1.71058500 |
| H  | 3.60150900  | -1.16541200 | 4.51235000  | C  | -2.00492100 | -1.94868400 | 0.06995500  |
| H  | 2.09117800  | -2.12900600 | 4.44051300  | C  | -2.73437400 | -2.16396700 | 1.25924500  |
| H  | 3.50334900  | -2.62618900 | 3.50463300  | C  | -2.70430700 | -1.39635700 | -1.01601300 |
| Ag | 2.61988800  | 1.32969900  | 0.75994800  | C  | -4.07147800 | -1.82409600 | 1.36903100  |

5\_AgOAc\_S

|   |             |             |             |   |             |             |             |
|---|-------------|-------------|-------------|---|-------------|-------------|-------------|
| C | 4.02011300  | -2.20507800 | -0.94271100 | H | -2.18032200 | -1.18077800 | -1.93643600 |
| C | 4.19090800  | -1.03092000 | -1.68645100 | C | -4.73968200 | -1.24808600 | 0.27704700  |
| C | 3.08343700  | -0.34970300 | -2.17929400 | H | -4.62148700 | -1.97948800 | 2.29095800  |
| C | 1.78967300  | -0.83647600 | -1.93967400 | H | -4.53629200 | -0.60304600 | -1.78116100 |
| C | 1.60389000  | -2.05728300 | -1.23700900 | H | -0.25938600 | -2.72331000 | 0.99413400  |
| C | 2.74506400  | -2.71484900 | -0.73464500 | O | -6.03999700 | -0.91043600 | 0.48463100  |
| H | 4.88376700  | -2.72308200 | -0.53781500 | C | -6.72204300 | -0.23006300 | -0.55778600 |
| H | 5.18717700  | -0.63497600 | -1.85681500 | H | -6.81742800 | -0.85305500 | -1.45629300 |
| H | 3.19056700  | 0.59063800  | -2.70720400 | H | -7.71877400 | -0.00882900 | -0.17235000 |
| H | 2.61120400  | -3.64579400 | -0.19305700 | H | -6.21826000 | 0.70891800  | -0.82045500 |
| C | 0.61814300  | 0.05342900  | -2.29297000 | C | 2.42629100  | -1.09843000 | 2.50316200  |
| O | 0.41898100  | 0.53386700  | -3.40625200 | O | 1.28025000  | -1.36487100 | 2.01122900  |
| N | -0.08499800 | 0.27774400  | -1.15121100 | O | 3.18817200  | -0.15969300 | 2.14368400  |
| C | -1.14909000 | 1.13800500  | -0.97673300 | C | 2.91613800  | -2.01834000 | 3.59772500  |
| C | -1.51562500 | 1.25125800  | 0.39377800  | H | 3.33298200  | -2.91865700 | 3.13232000  |
| C | -1.86976500 | 1.85301600  | -1.92163000 | H | 3.69759900  | -1.53787800 | 4.18715800  |
| C | -2.58750500 | 2.07040400  | 0.81944900  | H | 2.08756900  | -2.33008100 | 4.23703800  |
| C | -2.95087800 | 2.66238600  | -1.49971900 | C | 1.34132900  | 3.25004600  | -0.66074800 |
| H | -1.59015000 | 1.78273200  | -2.96392000 | O | 2.38514300  | 2.53117100  | -0.94925700 |
| C | -1.00969700 | 0.59335900  | 2.57550800  | O | 0.75053000  | 3.21803200  | 0.42861900  |



|    |             |            |             |
|----|-------------|------------|-------------|
| C  | 0.86976200  | 4.14304100 | -1.79517100 |
| H  | 0.64140100  | 3.52265400 | -2.66666000 |
| H  | -0.01407300 | 4.70931400 | -1.50011600 |
| H  | 1.67199900  | 4.82945300 | -2.08412900 |
| Ag | 2.71170400  | 1.22272800 | 0.63706100  |
